# Supplementary material for: Network stratification analysis for identifying function-specific network layers
Source: Royal Society of Chemistry journal article supplement (doi:10.1039/c5mb00782h), 2016-02-08
Supplement: c5mb00782h1.zip [file c5mb00782h1.zip]

## Sheet: normal
GO terms	Significance p-value	diseae enrichment ratio	GO term type
formation of translation preinitiation complex	6.48e-14	0	dependent GO term
DNA replication initiation	1.11e-13	0.142857	dependent GO term
DNA metabolic process	1.23e-11	0.333333	dependent GO term
regulation of translational initiation	9.6e-11	0	dependent GO term
DNA replication	1.15e-10	0.142857	dependent GO term
fibroblast growth factor receptor signaling pathway	1.75e-10	0.4	dependent GO term
translational initiation	2.31e-10	0	independent GO term
mismatch repair	3.09e-10	0.333333	dependent GO term
cellular response to fibroblast growth factor stimulus	1.06e-09	0.4	dependent GO term
DNA-dependent DNA replication	1.36e-09	0.142857	dependent GO term
Tie signaling pathway	2.66e-09	0.75	dependent GO term
ribonucleoprotein complex assembly	3.99e-09	0	dependent GO term
SCF-dependent proteasomal ubiquitin-dependent protein catabolic process	4.23e-09	0	dependent GO term
ribonucleoprotein complex subunit organization	5.35e-09	0	dependent GO term
regulation of gene expression, epigenetic	7.73e-09	0.2	dependent GO term
C-5 methylation of cytosine	8.11e-09	0.2	dependent GO term
anaphase-promoting complex-dependent proteasomal ubiquitin-dependent protein catabolic process	1.84e-08	0	dependent GO term
protein neddylation	1.85e-08	0	dependent GO term
macromolecule methylation	1.88e-08	0.2	dependent GO term
methylation	2.42e-08	0.2	independent GO term
acetyl-CoA biosynthetic process from pyruvate	2.97e-08	1	dependent GO term
superoxide anion generation	3.29e-08	0.833333	dependent GO term
transmembrane receptor protein tyrosine kinase signaling pathway	3.68e-08	0.642857	dependent GO term
negative regulation of axon extension involved in axon guidance	4.45e-08	0.333333	dependent GO term
transcription from mitochondrial promoter	4.45e-08	0.333333	dependent GO term
cellular response to interferon-alpha	4.45e-08	0	dependent GO term
purinergic nucleotide receptor signaling pathway	4.45e-08	0.333333	dependent GO term
DNA replication	4.48e-08	0.333333	dependent GO term
specification of organ identity	5.96e-08	0.4	dependent GO term
translational initiation	6.29e-08	0.25	independent GO term
mitotic chromosome condensation	6.35e-08	0	dependent GO term
S-adenosylmethioninamine metabolic process	8.11e-08	0.2	dependent GO term
DNA methylation on cytosine	8.11e-08	0.2	dependent GO term
DNA methylation on cytosine within a CG sequence	8.11e-08	0.2	dependent GO term
leukocyte activation	8.83e-08	0.363636	dependent GO term
detection of molecule of bacterial origin	9.31e-08	0.8	dependent GO term
regulation of translation	1.15e-07	0	dependent GO term
regulation of axon extension involved in axon guidance	1.17e-07	0.333333	dependent GO term
acetyl-CoA biosynthetic process	1.17e-07	1	dependent GO term
T cell activation	1.34e-07	0.363636	dependent GO term
regulation of leukocyte activation	1.4e-07	0.363636	dependent GO term
regulation of endothelial cell migration	1.44e-07	0.75	dependent GO term
cellular response to sterol depletion	1.49e-07	0.5	dependent GO term
SREBP signaling pathway	1.49e-07	0.5	dependent GO term
exocytosis	2.11e-07	0.555556	dependent GO term
response to sterol depletion	2.24e-07	0.5	dependent GO term
regulation of cell activation	2.36e-07	0.363636	independent GO term
thioester biosynthetic process	2.41e-07	1	dependent GO term
acyl-CoA biosynthetic process	2.41e-07	1	dependent GO term
regulation of actin filament polymerization	2.47e-07	0	dependent GO term
histone lysine methylation	2.85e-07	0.2	dependent GO term
ribonucleoprotein complex biogenesis	2.88e-07	0	dependent GO term
cell activation	2.92e-07	0.363636	independent GO term
mitochondrial RNA metabolic process	2.97e-07	0.333333	dependent GO term
response to interferon-alpha	2.97e-07	0	dependent GO term
actin filament polymerization	3.3e-07	0	dependent GO term
purinergic receptor signaling pathway	3.6e-07	0.333333	dependent GO term
epidermal growth factor receptor signaling pathway	4.17e-07	0.642857	dependent GO term
organ formation	4.4e-07	0.4	dependent GO term
regulation of actin filament length	4.52e-07	0	dependent GO term
regulation of actin polymerization or depolymerization	4.52e-07	0	dependent GO term
plasma lipoprotein particle clearance	5.02e-07	0.875	independent GO term
superoxide metabolic process	5.04e-07	0.833333	dependent GO term
regulation of epithelial cell migration	5.58e-07	0.75	dependent GO term
regulation of T cell activation	5.76e-07	0.363636	dependent GO term
neuron projection extension involved in neuron projection guidance	6.04e-07	0.333333	dependent GO term
axon extension involved in axon guidance	6.04e-07	0.333333	dependent GO term
negative regulation of axon extension	6.04e-07	0.333333	dependent GO term
antigen receptor-mediated signaling pathway	6.54e-07	0.363636	dependent GO term
endothelial cell migration	6.56e-07	0.75	dependent GO term
metaphase/anaphase transition of cell cycle	6.59e-07	0	dependent GO term
metaphase/anaphase transition of mitotic cell cycle	6.59e-07	0	dependent GO term
otic vesicle formation	6.81e-07	0.4	dependent GO term
ERBB signaling pathway	7.11e-07	0.642857	dependent GO term
histone methylation	7.34e-07	0.2	dependent GO term
regulation of protein polymerization	7.65e-07	0	dependent GO term
covalent chromatin modification	8.17e-07	0.2	dependent GO term
actin polymerization or depolymerization	8.56e-07	0	dependent GO term
response to ATP	9.38e-07	0.333333	dependent GO term
pyruvate metabolic process	1.07e-06	1	dependent GO term
positive regulation of interleukin-12 biosynthetic process	1.27e-06	0.428571	dependent GO term
regulation of immune system process	1.34e-06	0.363636	independent GO term
otic vesicle morphogenesis	1.34e-06	0.4	dependent GO term
circadian rhythm	1.35e-06	0.75	dependent GO term
negative regulation of chemotaxis	1.38e-06	0.333333	dependent GO term
cell division	1.43e-06	0.166667	independent GO term
immune response-activating cell surface receptor signaling pathway	1.49e-06	0.363636	dependent GO term
acetyl-CoA metabolic process	1.55e-06	1	dependent GO term
chromosome segregation	1.58e-06	0	independent GO term
lymphocyte activation	1.68e-06	0.363636	dependent GO term
enzyme linked receptor protein signaling pathway	1.76e-06	0.642857	dependent GO term
postreplication repair	1.81e-06	0	dependent GO term
endoplasmic reticulum unfolded protein response	1.94e-06	1	dependent GO term
DNA metabolic process	2.11e-06	0.142857	dependent GO term
posttranscriptional regulation of gene expression	2.14e-06	0	dependent GO term
chromosome condensation	2.15e-06	0	dependent GO term
cellular response to unfolded protein	2.15e-06	1	dependent GO term
hydrogen peroxide biosynthetic process	2.22e-06	0.833333	dependent GO term
transmembrane receptor protein tyrosine kinase signaling pathway	2.27e-06	0.4	dependent GO term
very-low-density lipoprotein particle clearance	2.31e-06	0.875	dependent GO term
S-adenosylhomocysteine metabolic process	2.32e-06	0.2	dependent GO term
negative regulation of developmental growth	2.38e-06	0.333333	dependent GO term
epithelium migration	2.48e-06	0.75	dependent GO term
epithelial cell migration	2.48e-06	0.75	dependent GO term
cellular response to growth factor stimulus	2.65e-06	0.4	dependent GO term
tissue migration	2.77e-06	0.75	independent GO term
planar cell polarity pathway involved in heart morphogenesis	2.77e-06	0.333333	dependent GO term
planar cell polarity pathway involved in outflow tract morphogenesis	2.77e-06	0.333333	dependent GO term
planar cell polarity pathway involved in cardiac right atrium morphogenesis	2.77e-06	0.333333	dependent GO term
planar cell polarity pathway involved in cardiac muscle tissue morphogenesis	2.77e-06	0.333333	dependent GO term
planar cell polarity pathway involved in ventricular septum morphogenesis	2.77e-06	0.333333	dependent GO term
planar cell polarity pathway involved in pericardium morphogenesis	2.77e-06	0.333333	dependent GO term
sphinganine biosynthetic process	2.77e-06	0	dependent GO term
peroxisomal long-chain fatty acid import	2.77e-06	0.5	dependent GO term
negative regulation of T-helper 1 type immune response	2.77e-06	0.5	dependent GO term
protein alkylation	2.87e-06	0.2	dependent GO term
protein methylation	2.87e-06	0.2	dependent GO term
protein polymerization	3e-06	0	dependent GO term
immune response-regulating cell surface receptor signaling pathway	3.03e-06	0.363636	dependent GO term
detection of biotic stimulus	3.03e-06	0.8	dependent GO term
interleukin-12 biosynthetic process	3.05e-06	0.428571	dependent GO term
regulation of interleukin-12 biosynthetic process	3.05e-06	0.428571	dependent GO term
chromatin modification	3.07e-06	0.2	dependent GO term
positive regulation of helicase activity	3.17e-06	0.333333	dependent GO term
base-excision repair	3.47e-06	0	dependent GO term
regulation of plasma lipoprotein particle levels	3.55e-06	0.875	independent GO term
cellular response to topologically incorrect protein	4.11e-06	1	dependent GO term
positive regulation of stem cell proliferation	4.19e-06	0.285714	dependent GO term
negative regulation of behavior	4.47e-06	0.333333	dependent GO term
otic vesicle development	4.54e-06	0.4	dependent GO term
regulation of gene expression by genetic imprinting	4.54e-06	0.2	dependent GO term
regulation of lymphocyte activation	4.58e-06	0.363636	dependent GO term
mitotic sister chromatid segregation	4.84e-06	0	dependent GO term
synaptic vesicle exocytosis	4.84e-06	0	dependent GO term
regulation of actin cytoskeleton organization	4.86e-06	0	dependent GO term
protein monoubiquitination	5.23e-06	0.25	dependent GO term
negative regulation of axonogenesis	5.23e-06	0.333333	dependent GO term
sister chromatid segregation	5.65e-06	0	dependent GO term
immune system process	5.92e-06	0.363636	independent GO term
telomere maintenance	6.08e-06	0	dependent GO term
telomere organization	6.54e-06	0	dependent GO term
ER to Golgi vesicle-mediated transport	6.54e-06	0	dependent GO term
ER-nucleus signaling pathway	6.54e-06	1	independent GO term
nucleotide-excision repair	6.54e-06	0.333333	dependent GO term
regulation of circadian rhythm	7.01e-06	0.333333	independent GO term
regulation of cellular component size	7.64e-06	0	dependent GO term
positive regulation of histone methylation	7.85e-06	0.2	dependent GO term
DNA unwinding involved in DNA replication	8.31e-06	0.142857	dependent GO term
cardiac right atrium morphogenesis	8.32e-06	0.333333	dependent GO term
atrioventricular node development	8.32e-06	0.666667	dependent GO term
cellular response to cycloheximide	8.32e-06	1	dependent GO term
maturation of LSU-rRNA	8.32e-06	0	dependent GO term
maturation of LSU-rRNA from tricistronic rRNA transcript (SSU-rRNA, 5.8S rRNA, LSU-rRNA)	8.32e-06	0	dependent GO term
sphinganine metabolic process	8.32e-06	0	dependent GO term
S-adenosylmethionine biosynthetic process	8.32e-06	1	dependent GO term
nucleotide-excision repair, DNA incision, 5'-to lesion	8.32e-06	0	dependent GO term
nucleotide-excision repair, DNA incision, 3'-to lesion	8.32e-06	0	dependent GO term
regulation of translation	8.84e-06	0.25	dependent GO term
extrinsic apoptotic signaling pathway via death domain receptors	9.16e-06	0.75	dependent GO term
regulation of axon extension	9.16e-06	0.333333	dependent GO term
MHC protein complex assembly	9.5e-06	1	dependent GO term
MHC class I protein complex assembly	9.5e-06	1	dependent GO term
transcription initiation from mitochondrial promoter	9.5e-06	0.333333	dependent GO term
neutrophil aggregation	9.5e-06	0.666667	dependent GO term
endonucleolytic cleavage in ITS1 to separate SSU-rRNA from 5.8S rRNA and LSU-rRNA from tricistronic rRNA transcript (SSU-rRNA, 5.8S rRNA, LSU-rRNA)	9.5e-06	0	dependent GO term
endonucleolytic cleavage to generate mature 3'-end of SSU-rRNA from (SSU-rRNA, 5.8S rRNA, LSU-rRNA)	9.5e-06	0	dependent GO term
regulation of actin filament-based process	9.99e-06	0	independent GO term
mitotic cell cycle	1.01e-05	0	dependent GO term
vesicle-mediated transport	1.06e-05	0.555556	independent GO term
actin filament organization	1.06e-05	0	dependent GO term
regulation of protein complex assembly	1.1e-05	0	dependent GO term
regulation of helicase activity	1.11e-05	0.333333	dependent GO term
somatic diversification of immune receptors via somatic mutation	1.11e-05	0.333333	dependent GO term
somatic hypermutation of immunoglobulin genes	1.11e-05	0.333333	dependent GO term
ubiquitin-dependent protein catabolic process	1.21e-05	0.285714	dependent GO term
chromatin organization	1.21e-05	0.2	dependent GO term
response to unfolded protein	1.24e-05	1	dependent GO term
fibrinolysis	1.26e-05	0.833333	dependent GO term
regulation of stem cell proliferation	1.27e-05	0.285714	dependent GO term
modification-dependent protein catabolic process	1.33e-05	0.285714	dependent GO term
ameboidal cell migration	1.33e-05	0.75	dependent GO term
modification-dependent macromolecule catabolic process	1.38e-05	0.285714	dependent GO term
positive regulation of cAMP biosynthetic process	1.39e-05	1	dependent GO term
genetic imprinting	1.43e-05	0.2	dependent GO term
somatic recombination of immunoglobulin gene segments	1.44e-05	0.333333	dependent GO term
mitotic cell cycle phase transition	1.46e-05	0	dependent GO term
regulation of phosphate metabolic process	1.49e-05	0.642857	dependent GO term
chromatin assembly or disassembly	1.5e-05	0	dependent GO term
regulation of phosphorus metabolic process	1.55e-05	0.642857	dependent GO term
regulation of extent of cell growth	1.55e-05	0.333333	dependent GO term
mesenchymal cell apoptotic process involved in metanephros development	1.66e-05	0.5	dependent GO term
regulation of mesenchymal cell apoptotic process involved in metanephros development	1.66e-05	0.5	dependent GO term
negative regulation of mesenchymal cell apoptotic process involved in metanephros development	1.66e-05	0.5	dependent GO term
sphingomyelin biosynthetic process	1.66e-05	0	dependent GO term
positive regulation of arachidonic acid secretion	1.66e-05	0.5	dependent GO term
positive regulation of telomere maintenance	1.66e-05	0	dependent GO term
hypusine metabolic process	1.66e-05	0	dependent GO term
peptidyl-lysine modification to hypusine	1.66e-05	0	dependent GO term
receptor internalization	1.72e-05	1	dependent GO term
somatic diversification of immunoglobulins	1.76e-05	0.333333	dependent GO term
positive regulation of cAMP metabolic process	1.81e-05	1	dependent GO term
thioester metabolic process	1.81e-05	1	independent GO term
acyl-CoA metabolic process	1.81e-05	1	dependent GO term
cellular macromolecular complex assembly	1.86e-05	0	dependent GO term
regulation of immune effector process	1.92e-05	0.5	dependent GO term
RNA biosynthetic process	1.93e-05	0.363636	dependent GO term
nuclear division	1.95e-05	0	dependent GO term
mitosis	1.95e-05	0	dependent GO term
response to topologically incorrect protein	2e-05	1	dependent GO term
regulation of phosphorylation	2.14e-05	0.642857	dependent GO term
tissue development	2.17e-05	0.285714	dependent GO term
T cell receptor signaling pathway	2.22e-05	0.363636	dependent GO term
regulation of organ morphogenesis	2.24e-05	0.4	dependent GO term
positive regulation of cyclic nucleotide biosynthetic process	2.31e-05	1	dependent GO term
immune response-activating signal transduction	2.35e-05	0.363636	dependent GO term
organ induction	2.37e-05	0.4	dependent GO term
membrane disassembly	2.39e-05	0.25	dependent GO term
nuclear envelope disassembly	2.39e-05	0.25	dependent GO term
DNA biosynthetic process	2.43e-05	0	dependent GO term
regulation of blood vessel endothelial cell migration	2.43e-05	0.75	dependent GO term
respiratory burst	2.46e-05	0.833333	independent GO term
DNA repair	2.5e-05	0.333333	dependent GO term
proteolysis involved in cellular protein catabolic process	2.52e-05	0.285714	dependent GO term
response to endoplasmic reticulum stress	2.54e-05	1	dependent GO term
enzyme linked receptor protein signaling pathway	2.62e-05	0.4	dependent GO term
positive regulation of endothelial cell migration	2.63e-05	0.75	dependent GO term
positive regulation of nucleotide biosynthetic process	2.65e-05	1	dependent GO term
positive regulation of purine nucleotide biosynthetic process	2.65e-05	1	dependent GO term
rhythmic process	2.67e-05	0.75	independent GO term
pericardium morphogenesis	2.77e-05	0.333333	dependent GO term
regulation of mast cell chemotaxis	2.77e-05	1	dependent GO term
positive regulation of mast cell chemotaxis	2.77e-05	1	dependent GO term
positive regulation of natural killer cell mediated immune response to tumor cell	2.77e-05	1	dependent GO term
positive regulation of natural killer cell mediated cytotoxicity directed against tumor cell target	2.77e-05	1	dependent GO term
positive regulation of natural killer cell chemotaxis	2.77e-05	1	dependent GO term
maturation of 5.8S rRNA from tricistronic rRNA transcript (SSU-rRNA, 5.8S rRNA, LSU-rRNA)	2.77e-05	0	dependent GO term
regulation of arachidonic acid secretion	2.77e-05	0.5	dependent GO term
positive regulation of cytoplasmic mRNA processing body assembly	2.77e-05	0	dependent GO term
succinyl-CoA metabolic process	2.77e-05	0	dependent GO term
protein phosphorylation	2.8e-05	0.666667	dependent GO term
meiotic chromosome condensation	2.85e-05	0	dependent GO term
activation of signaling protein activity involved in unfolded protein response	2.85e-05	1	dependent GO term
RNA phosphodiester bond hydrolysis, endonucleolytic	2.85e-05	0	dependent GO term
cleavage involved in rRNA processing	2.85e-05	0	dependent GO term
endonucleolytic cleavage involved in rRNA processing	2.85e-05	0	dependent GO term
endonucleolytic cleavage of tricistronic rRNA transcript (SSU-rRNA, 5.8S rRNA, LSU-rRNA)	2.85e-05	0	dependent GO term
rRNA 3'-end processing	2.85e-05	0	dependent GO term
neuron projection extension	2.9e-05	0.333333	dependent GO term
axon extension	2.9e-05	0.333333	dependent GO term
regulation of histone methylation	2.96e-05	0.2	dependent GO term
cellular protein catabolic process	2.97e-05	0.285714	dependent GO term
regulation of cytoskeleton organization	3.12e-05	0	dependent GO term
positive regulation of cyclic nucleotide metabolic process	3.16e-05	1	dependent GO term
ER-nucleus signaling pathway	3.28e-05	0.5	independent GO term
regulation of kinase activity	3.3e-05	0.642857	dependent GO term
somatic cell DNA recombination	3.32e-05	0.333333	dependent GO term
somatic diversification of immune receptors via germline recombination within a single locus	3.32e-05	0.333333	dependent GO term
reactive oxygen species metabolic process	3.48e-05	0.833333	independent GO term
organelle fission	3.49e-05	0	dependent GO term
transcription initiation from RNA polymerase II promoter	3.52e-05	0	dependent GO term
insulin receptor signaling pathway	3.72e-05	0.75	dependent GO term
positive regulation of nucleotide metabolic process	3.72e-05	1	dependent GO term
positive regulation of purine nucleotide metabolic process	3.72e-05	1	dependent GO term
establishment of synaptic vesicle localization	3.72e-05	0	dependent GO term
synaptic vesicle transport	3.72e-05	0	dependent GO term
embryonic hemopoiesis	3.74e-05	0.5	dependent GO term
immune response-regulating signaling pathway	3.79e-05	0.363636	dependent GO term
somatic diversification of immune receptors	3.91e-05	0.333333	dependent GO term
negative regulation of gene expression, epigenetic	4.01e-05	0.2	dependent GO term
receptor guanylyl cyclase signaling pathway	4.16e-05	0.5	dependent GO term
regulation of metanephric glomerulus development	4.16e-05	0.5	dependent GO term
natural killer cell mediated immune response to tumor cell	4.16e-05	1	dependent GO term
natural killer cell mediated cytotoxicity directed against tumor cell target	4.16e-05	1	dependent GO term
regulation of natural killer cell mediated immune response to tumor cell	4.16e-05	1	dependent GO term
regulation of natural killer cell mediated cytotoxicity directed against tumor cell target	4.16e-05	1	dependent GO term
complement activation, alternative pathway	4.16e-05	1	dependent GO term
diol biosynthetic process	4.16e-05	0	dependent GO term
sphingosine biosynthetic process	4.16e-05	0	dependent GO term
positive regulation of interleukin-5 production	4.16e-05	0.5	dependent GO term
synaptic vesicle localization	4.19e-05	0	dependent GO term
regulation of transferase activity	4.34e-05	0.642857	dependent GO term
chromosome organization	4.54e-05	0.2	dependent GO term
regulation of immune response	4.85e-05	0.363636	dependent GO term
regulation of cAMP biosynthetic process	4.87e-05	1	dependent GO term
regulation of translational initiation	4.89e-05	0.25	dependent GO term
cell cycle phase transition	4.9e-05	0	dependent GO term
DNA repair	4.97e-05	0	dependent GO term
DNA repair	4.97e-05	0	dependent GO term
coenzyme biosynthetic process	5.05e-05	1	dependent GO term
leukocyte activation	5.11e-05	0.5	dependent GO term
smooth muscle contraction	5.23e-05	0.333333	dependent GO term
response to hypoxia	5.24e-05	0.75	dependent GO term
regulation of translation	5.34e-05	0.4	dependent GO term
cellular response to endogenous stimulus	5.38e-05	0.4	dependent GO term
response to decreased oxygen levels	5.45e-05	0.75	dependent GO term
positive regulation of cell proliferation	5.46e-05	0.4	dependent GO term
cellular protein complex assembly	5.67e-05	0	dependent GO term
interleukin-2-mediated signaling pathway	5.7e-05	1	dependent GO term
dichotomous subdivision of terminal units involved in salivary gland branching	5.7e-05	0.333333	dependent GO term
renal control of peripheral vascular resistance involved in regulation of systemic arterial blood pressure	5.7e-05	0.666667	dependent GO term
renin-angiotensin regulation of aldosterone production	5.7e-05	0.666667	dependent GO term
regulation of blood vessel size by renin-angiotensin	5.7e-05	0.666667	dependent GO term
RNA phosphodiester bond hydrolysis	5.7e-05	0	dependent GO term
nucleobase-containing compound biosynthetic process	5.76e-05	0.363636	dependent GO term
DNA alkylation	5.77e-05	0.2	dependent GO term
DNA methylation	5.77e-05	0.2	dependent GO term
negative regulation of cell projection organization	5.81e-05	0.333333	dependent GO term
SRP-dependent cotranslational protein targeting to membrane	5.82e-05	0	dependent GO term
natural killer cell chemotaxis	5.82e-05	1	dependent GO term
regulation of natural killer cell chemotaxis	5.82e-05	1	dependent GO term
sphingoid biosynthetic process	5.82e-05	0	dependent GO term
protein localization to chromosome, telomeric region	5.82e-05	0	dependent GO term
regulation of cytoplasmic mRNA processing body assembly	5.82e-05	0	dependent GO term
very long-chain fatty acid catabolic process	5.82e-05	0.5	dependent GO term
positive regulation of chemokine secretion	5.82e-05	0.5	dependent GO term
Mo-molybdopterin cofactor metabolic process	5.82e-05	0	dependent GO term
molybdopterin cofactor biosynthetic process	5.82e-05	0	dependent GO term
Mo-molybdopterin cofactor biosynthetic process	5.82e-05	0	dependent GO term
nucleotide-excision repair, DNA incision	5.82e-05	0	dependent GO term
membrane fusion	5.96e-05	0.555556	dependent GO term
regulation of cell size	6.01e-05	0.333333	dependent GO term
phosphorylation	6.53e-05	0.666667	dependent GO term
cAMP biosynthetic process	6.65e-05	1	dependent GO term
regulation of anatomical structure size	6.77e-05	0	independent GO term
protein transport	7.08e-05	0.555556	dependent GO term
negative regulation of neurogenesis	7.1e-05	0.333333	dependent GO term
Notch signaling pathway	7.1e-05	0.333333	dependent GO term
detection of lipopolysaccharide	7.16e-05	0.8	dependent GO term
translation	7.21e-05	0	dependent GO term
aromatic compound biosynthetic process	7.26e-05	0.363636	dependent GO term
response to oxygen levels	7.28e-05	0.75	dependent GO term
heterocycle biosynthetic process	7.31e-05	0.363636	dependent GO term
regulation of organ formation	7.39e-05	0.4	dependent GO term
regulation of transcription from RNA polymerase II promoter	7.51e-05	0.363636	dependent GO term
immune response	7.67e-05	0.363636	dependent GO term
stem cell proliferation	7.72e-05	0.285714	dependent GO term
protein localization to chromatin	7.76e-05	0	dependent GO term
cellular copper ion homeostasis	7.76e-05	0	dependent GO term
response to cycloheximide	7.76e-05	1	dependent GO term
skeletal muscle tissue growth	7.76e-05	0.5	dependent GO term
chemokine secretion	7.76e-05	0.5	dependent GO term
regulation of chemokine secretion	7.76e-05	0.5	dependent GO term
prosthetic group metabolic process	7.76e-05	0	dependent GO term
molybdopterin cofactor metabolic process	7.76e-05	0	dependent GO term
UV protection	7.76e-05	0	dependent GO term
negative regulation of ATPase activity	7.76e-05	1	dependent GO term
blood vessel endothelial cell migration	7.77e-05	0.75	dependent GO term
organ growth	7.81e-05	0.333333	dependent GO term
establishment of vesicle localization	7.81e-05	0	dependent GO term
neurotransmitter secretion	7.81e-05	0	dependent GO term
regulation of transcription from RNA polymerase II promoter	7.92e-05	0.5	dependent GO term
developmental induction	7.99e-05	0.4	dependent GO term
cellular response to amino acid stimulus	7.99e-05	0.2	dependent GO term
negative regulation of hemostasis	8.3e-05	0.833333	dependent GO term
negative regulation of blood coagulation	8.3e-05	0.833333	dependent GO term
activation of immune response	8.31e-05	0.363636	dependent GO term
angiogenesis	8.31e-05	0.75	dependent GO term
regulation of cyclic nucleotide biosynthetic process	8.56e-05	1	dependent GO term
regulation of cAMP metabolic process	8.56e-05	1	dependent GO term
developmental cell growth	8.56e-05	0.333333	dependent GO term
cell-cell signaling involved in cell fate commitment	8.62e-05	0.4	dependent GO term
positive regulation of histone modification	8.62e-05	0.2	dependent GO term
ventricular septum development	8.62e-05	0.6	dependent GO term
negative regulation of angiogenesis	8.63e-05	0.75	dependent GO term
cellular nitrogen compound biosynthetic process	8.83e-05	0.363636	dependent GO term
negative regulation of DNA recombination	9.04e-05	0.333333	dependent GO term
posttranscriptional regulation of gene expression	9.12e-05	0.25	dependent GO term
protein catabolic process	9.23e-05	0.285714	dependent GO term
regulation of purine nucleotide biosynthetic process	9.37e-05	1	dependent GO term
negative regulation of sodium ion transport	9.5e-05	0.25	dependent GO term
bone mineralization involved in bone maturation	9.5e-05	0.666667	dependent GO term
regulation of branching involved in salivary gland morphogenesis by mesenchymal-epithelial signaling	9.5e-05	0.333333	dependent GO term
nucleosome positioning	9.5e-05	0	dependent GO term
negative regulation of neurotrophin TRK receptor signaling pathway	9.5e-05	0.666667	dependent GO term
maturation of 5.8S rRNA from tricistronic rRNA transcript (SSU-rRNA, 5.8S rRNA, LSU-rRNA)	9.5e-05	0	dependent GO term
transmembrane receptor protein tyrosine kinase signaling pathway	9.54e-05	0.75	dependent GO term
regulation of adaptive immune response based on somatic recombination of immune receptors built from immunoglobulin superfamily domains	9.55e-05	0.5	dependent GO term
regulation of nucleotide biosynthetic process	9.64e-05	1	dependent GO term
establishment of protein localization	9.77e-05	0.555556	independent GO term
cotranslational protein targeting to membrane	9.98e-05	0	dependent GO term
protein targeting to ER	9.98e-05	0	dependent GO term
positive regulation of response to tumor cell	9.98e-05	1	dependent GO term
positive regulation of immune response to tumor cell	9.98e-05	1	dependent GO term
negative regulation of telomere maintenance	9.98e-05	0	dependent GO term
leukocyte tethering or rolling	9.98e-05	1	dependent GO term
negative regulation of telomere maintenance	9.98e-05	0	dependent GO term
positive regulation of epithelial cell migration	0.0001	0.75	dependent GO term
negative regulation of coagulation	0.000101	0.833333	dependent GO term
organic cyclic compound biosynthetic process	0.000104	0.363636	dependent GO term
cofactor biosynthetic process	0.000105	1	dependent GO term
transcription from RNA polymerase II promoter	0.000106	0.5	dependent GO term
cell fate commitment	0.000109	0.4	dependent GO term
transcription from RNA polymerase II promoter	0.00011	0.363636	dependent GO term
hydrogen peroxide metabolic process	0.00011	0.833333	dependent GO term
vesicle-mediated transport	0.00011	0.333333	independent GO term
endocytosis	0.000113	0.875	dependent GO term
cellular macromolecule catabolic process	0.000117	0.285714	dependent GO term
receptor-mediated endocytosis	0.000117	1	dependent GO term
regulation of chemotaxis	0.000121	0.333333	dependent GO term
regulation of axonogenesis	0.000121	0.333333	dependent GO term
DNA methylation or demethylation	0.000123	0.2	dependent GO term
ventricular cardiac muscle tissue development	0.000123	0.6	dependent GO term
regulation of cellular component biogenesis	0.000123	0	independent GO term
regulation of adaptive immune response	0.000124	0.5	dependent GO term
receptor metabolic process	0.000124	1	dependent GO term
cell activation	0.000125	0.5	independent GO term
primitive streak formation	0.000125	0.333333	dependent GO term
establishment of protein localization to endoplasmic reticulum	0.000125	0	dependent GO term
negative regulation of mesenchymal cell apoptotic process	0.000125	0.5	dependent GO term
mast cell chemotaxis	0.000125	1	dependent GO term
regulation of response to tumor cell	0.000125	1	dependent GO term
regulation of immune response to tumor cell	0.000125	1	dependent GO term
response to interleukin-15	0.000125	1	dependent GO term
copper ion homeostasis	0.000125	0	dependent GO term
sphingosine metabolic process	0.000125	0	dependent GO term
negative regulation of intracellular estrogen receptor signaling pathway	0.000125	0	dependent GO term
succinate metabolic process	0.000125	0	dependent GO term
complement activation, lectin pathway	0.000125	0.5	dependent GO term
positive regulation of macrophage activation	0.000125	0.5	dependent GO term
cellular response to acid	0.000131	0.2	dependent GO term
negative regulation of cell development	0.000131	0.333333	dependent GO term
positive regulation of immune system process	0.000133	0.363636	dependent GO term
regulation of ubiquitin-protein ligase activity	0.000133	0	dependent GO term
immunoglobulin production	0.000134	0.333333	dependent GO term
RNA metabolic process	0.000134	0.363636	dependent GO term
Golgi vesicle transport	0.000134	0	dependent GO term
nucleic acid metabolic process	0.00014	0.333333	dependent GO term
mRNA processing	0.00014	0	dependent GO term
cyclic nucleotide biosynthetic process	0.000141	1	dependent GO term
cyclic purine nucleotide metabolic process	0.000141	1	dependent GO term
regulation of telomere maintenance via telomerase	0.000143	0	dependent GO term
isocitrate metabolic process	0.000143	0	dependent GO term
positive regulation of nuclease activity	0.000143	1	dependent GO term
transforming growth factor beta receptor signaling pathway	0.000145	0.666667	dependent GO term
serotonin production involved in inflammatory response	0.000146	0.4	dependent GO term
serotonin secretion involved in inflammatory response	0.000146	0.4	dependent GO term
serotonin secretion by platelet	0.000146	0.4	dependent GO term
regulation of translational initiation	0.000149	0.4	dependent GO term
positive regulation of chromosome organization	0.000149	0.2	dependent GO term
vesicle localization	0.000149	0	dependent GO term
proteasomal protein catabolic process	0.00015	0	dependent GO term
actin cytoskeleton organization	0.000151	0	dependent GO term
cardiac conduction system development	0.000152	0.666667	dependent GO term
cranial suture morphogenesis	0.000152	0	dependent GO term
cardiac chamber formation	0.000152	0.5	dependent GO term
positive regulation of vascular endothelial growth factor receptor signaling pathway	0.000152	1	dependent GO term
immune response to tumor cell	0.000152	1	dependent GO term
maturation of 5.8S rRNA	0.000152	0	dependent GO term
diol metabolic process	0.000152	0	dependent GO term
regulation of stem cell maintenance	0.000152	0	dependent GO term
regulation of ventricular cardiac muscle cell membrane repolarization	0.000152	1	dependent GO term
oxaloacetate metabolic process	0.000152	0.5	dependent GO term
positive regulation of mast cell activation involved in immune response	0.000152	0.5	dependent GO term
positive regulation of mast cell degranulation	0.000152	0.5	dependent GO term
regulation of cyclic nucleotide metabolic process	0.00016	1	dependent GO term
cAMP metabolic process	0.00016	1	dependent GO term
circadian rhythm	0.00016	0.333333	dependent GO term
regulation of synaptic plasticity	0.000164	0.666667	dependent GO term
regulation of mRNA processing	0.000168	0	dependent GO term
glial cell differentiation	0.00017	0.285714	dependent GO term
regulation of leukocyte mediated immunity	0.000177	0.5	dependent GO term
negative regulation of neuron apoptotic process	0.000177	0	dependent GO term
regulation of cardiac muscle tissue development	0.000178	0.4	dependent GO term
inflammatory response	0.000179	0.5	dependent GO term
chromosome segregation	0.000181	0	independent GO term
regulation of leukocyte activation	0.000182	0.5	dependent GO term
prepulse inhibition	0.000183	0.5	dependent GO term
metanephric mesenchyme development	0.000183	0.5	dependent GO term
mesonephric tubule development	0.000183	0.5	dependent GO term
outflow tract septum morphogenesis	0.000183	0.5	dependent GO term
copper ion transport	0.000183	0	dependent GO term
sphingomyelin metabolic process	0.000183	0	dependent GO term
negative regulation of oligodendrocyte differentiation	0.000183	0.5	dependent GO term
wound healing, spreading of epidermal cells	0.000183	1	dependent GO term
positive regulation of leukocyte degranulation	0.000183	0.5	dependent GO term
blood vessel morphogenesis	0.000186	0.75	dependent GO term
DNA modification	0.000189	0.2	dependent GO term
neurotransmitter transport	0.000189	0	independent GO term
secretion by cell	0.000192	0.555556	dependent GO term
regulation of ligase activity	0.000192	0	dependent GO term
regulation of developmental growth	0.000194	0.333333	dependent GO term
minus-end-directed organelle transport along microtubule	0.000198	0.25	dependent GO term
lymphocyte homeostasis	0.0002	0.8	dependent GO term
SRP-dependent cotranslational protein targeting to membrane	0.0002	0.25	dependent GO term
follicle-stimulating hormone signaling pathway	0.0002	0.333333	dependent GO term
Sertoli cell proliferation	0.0002	0.333333	dependent GO term
cellular sodium ion homeostasis	0.0002	0.666667	dependent GO term
brain renin-angiotensin system	0.0002	0.666667	dependent GO term
nucleotide-excision repair, DNA incision	0.0002	0.333333	dependent GO term
ncRNA 3'-end processing	0.0002	0	dependent GO term
negative regulation of cell growth	0.000203	0.333333	dependent GO term
cell cycle process	0.000204	0	independent GO term
negative regulation of response to external stimulus	0.000208	0.333333	dependent GO term
developmental growth involved in morphogenesis	0.000212	0.333333	dependent GO term
craniofacial suture morphogenesis	0.000216	0	dependent GO term
lymph node development	0.000216	0.5	dependent GO term
mesenchymal cell apoptotic process	0.000216	0.5	dependent GO term
regulation of mesenchymal cell apoptotic process	0.000216	0.5	dependent GO term
regulation of glomerulus development	0.000216	0.5	dependent GO term
mesonephric epithelium development	0.000216	0.5	dependent GO term
positive regulation of mast cell activation	0.000216	1	dependent GO term
negative regulation by host of viral transcription	0.000216	1	dependent GO term
regulation of lymphocyte chemotaxis	0.000216	1	dependent GO term
gamma-aminobutyric acid secretion	0.000216	0.5	dependent GO term
sphingoid metabolic process	0.000216	0	dependent GO term
positive regulation of icosanoid secretion	0.000216	0.5	dependent GO term
positive regulation of organelle assembly	0.000216	0	dependent GO term
semaphorin-plexin signaling pathway	0.000216	0	dependent GO term
positive regulation of mast cell activation	0.000216	0.5	dependent GO term
interleukin-5 production	0.000216	0.5	independent GO term
regulation of interleukin-5 production	0.000216	0.5	dependent GO term
retrograde vesicle-mediated transport, Golgi to ER	0.000216	0	dependent GO term
response to organophosphorus	0.000217	0.333333	dependent GO term
actin filament-based process	0.000224	0	independent GO term
positive regulation of immune effector process	0.000229	0.5	dependent GO term
histone modification	0.00023	0.2	dependent GO term
regulation of cell migration	0.000231	0.75	dependent GO term
anatomical structure morphogenesis	0.000237	0.285714	dependent GO term
meiotic cytokinesis	0.000239	0	dependent GO term
hemidesmosome assembly	0.000239	0.5	dependent GO term
activation of transmembrane receptor protein tyrosine kinase activity	0.000239	0.75	dependent GO term
positive regulation of granulocyte macrophage colony-stimulating factor production	0.000239	0.5	dependent GO term
positive regulation of immune system process	0.000243	0.75	dependent GO term
regulation of cAMP biosynthetic process	0.000244	0.75	dependent GO term
interphase	0.000247	0.666667	dependent GO term
negative regulation of neuron death	0.000247	0	dependent GO term
translational initiation	0.000249	0.4	independent GO term
regulation of establishment of planar polarity involved in neural tube closure	0.000252	0.333333	dependent GO term
planar cell polarity pathway involved in neural tube closure	0.000252	0.333333	dependent GO term
coronary vasculature development	0.000252	1	dependent GO term
response to tumor cell	0.000252	1	dependent GO term
gamma-aminobutyric acid transport	0.000252	0.5	dependent GO term
serotonin receptor signaling pathway	0.000252	0.5	dependent GO term
regulation of telomere maintenance	0.000252	0	dependent GO term
negative regulation of adaptive immune response based on somatic recombination of immune receptors built from immunoglobulin superfamily domains	0.000252	0.5	dependent GO term
regulation of telomere maintenance	0.000252	0	dependent GO term
regulation of neurotransmitter levels	0.000253	0	independent GO term
cellular response to insulin stimulus	0.000258	0.75	dependent GO term
cardiac septum development	0.000262	0.6	dependent GO term
regulation of cell activation	0.000263	0.5	independent GO term
cellular response to interleukin-15	0.000266	1	dependent GO term
negative regulation of skeletal muscle tissue development	0.000266	0.666667	dependent GO term
protein deneddylation	0.000266	0	dependent GO term
cullin deneddylation	0.000266	0	dependent GO term
regulation of follicle-stimulating hormone secretion	0.000266	0.666667	dependent GO term
neuroendocrine cell differentiation	0.000266	0.666667	dependent GO term
regulation of attachment of spindle microtubules to kinetochore	0.000266	0.333333	dependent GO term
UV protection	0.000266	0.333333	dependent GO term
transcription-coupled nucleotide-excision repair	0.000266	0.333333	dependent GO term
urinary bladder smooth muscle contraction	0.000266	0.333333	dependent GO term
regulation of DNA metabolic process	0.000271	0.333333	dependent GO term
regulation of cell motility	0.000271	0.75	dependent GO term
negative regulation of B cell mediated immunity	0.000279	0.5	dependent GO term
negative regulation of immunoglobulin mediated immune response	0.000279	0.5	dependent GO term
negative regulation of humoral immune response mediated by circulating immunoglobulin	0.000279	0.5	dependent GO term
negative regulation of cardiac muscle tissue development	0.000291	0.4	dependent GO term
intracellular mRNA localization	0.000291	0.4	dependent GO term
Notch receptor processing	0.000291	0.6	dependent GO term
establishment of planar polarity of embryonic epithelium	0.000291	0.333333	dependent GO term
establishment of planar polarity involved in neural tube closure	0.000291	0.333333	dependent GO term
dopaminergic neuron differentiation	0.000291	0.333333	dependent GO term
adenohypophysis development	0.000291	0.5	dependent GO term
kidney mesenchyme development	0.000291	0.5	dependent GO term
muscle cell fate commitment	0.000291	0.5	dependent GO term
positive regulation of response to biotic stimulus	0.000291	1	dependent GO term
negative regulation of viral transcription	0.000291	1	dependent GO term
epiboly	0.000291	1	dependent GO term
epiboly involved in wound healing	0.000291	1	dependent GO term
wound healing, spreading of cells	0.000291	1	dependent GO term
S-adenosylmethionine metabolic process	0.000291	1	dependent GO term
positive regulation of MAPK cascade	0.000295	0.5	dependent GO term
mRNA metabolic process	0.000303	0	dependent GO term
regulation of transmembrane receptor protein serine/threonine kinase signaling pathway	0.000304	0.666667	dependent GO term
cardiac ventricle morphogenesis	0.000305	0.6	dependent GO term
mitotic cell cycle	0.000311	0	dependent GO term
cellular response to transforming growth factor beta stimulus	0.000316	0.666667	dependent GO term
establishment of organelle localization	0.000329	0	independent GO term
regulation of interleukin-12 production	0.00033	0.428571	dependent GO term
cAMP biosynthetic process	0.000333	0.75	dependent GO term
convergent extension	0.000333	0.333333	dependent GO term
mismatch repair	0.000333	0	dependent GO term
mesodermal cell fate specification	0.000333	0	dependent GO term
positive regulation of lymphocyte migration	0.000333	1	dependent GO term
2-oxoglutarate metabolic process	0.000333	0.5	dependent GO term
regulation of icosanoid secretion	0.000333	0.5	dependent GO term
positive regulation of fatty acid transport	0.000333	0.5	dependent GO term
cytoplasmic mRNA processing body assembly	0.000333	0	dependent GO term
negative regulation of adaptive immune response	0.000333	0.5	dependent GO term
response to purine-containing compound	0.000335	0.333333	dependent GO term
regulation of protein phosphorylation	0.000338	0.642857	dependent GO term
blood vessel development	0.000338	0.75	dependent GO term
cotranslational protein targeting to membrane	0.000342	0.25	dependent GO term
protein targeting to ER	0.000342	0.25	dependent GO term
telomere maintenance via telomerase	0.000342	0	dependent GO term
cell cycle phase	0.000342	0.666667	dependent GO term
DNA packaging	0.000342	0	dependent GO term
disruption by host of symbiont cells	0.000342	0.666667	dependent GO term
killing by host of symbiont cells	0.000342	0.666667	dependent GO term
ossification involved in bone maturation	0.000342	0.666667	independent GO term
regulation of neurotrophin TRK receptor signaling pathway	0.000342	0.666667	dependent GO term
leukocyte migration involved in inflammatory response	0.000342	0.666667	dependent GO term
leukocyte aggregation	0.000342	0.666667	dependent GO term
peristalsis	0.000342	0.333333	dependent GO term
urinary tract smooth muscle contraction	0.000342	0.333333	dependent GO term
cholesterol metabolic process	0.000344	0.5	dependent GO term
cyclic nucleotide metabolic process	0.000348	1	dependent GO term
protein ubiquitination	0.000352	0	dependent GO term
neuron projection guidance	0.000355	0.333333	dependent GO term
axon guidance	0.000355	0.333333	dependent GO term
positive regulation of macrophage cytokine production	0.000358	0.8	dependent GO term
regulation of RNA biosynthetic process	0.00036	0.363636	dependent GO term
protein dephosphorylation	0.000366	0.666667	dependent GO term
positive regulation of angiogenesis	0.000367	0.75	dependent GO term
regulation of action potential	0.000368	0.333333	independent GO term
regulation of locomotion	0.00037	0.75	independent GO term
pericardium development	0.000377	0.333333	dependent GO term
fibrinolysis	0.000377	1	dependent GO term
induction of positive chemotaxis	0.000377	1	dependent GO term
positive regulation of B cell mediated immunity	0.000377	1	dependent GO term
positive regulation of immunoglobulin mediated immune response	0.000377	1	dependent GO term
membrane repolarization	0.000377	1	dependent GO term
regulation of membrane repolarization	0.000377	1	dependent GO term
organ regeneration	0.000379	0.75	dependent GO term
interleukin-12 production	0.000385	0.428571	independent GO term
adenylate cyclase-modulating G-protein coupled receptor signaling pathway	0.000391	0.6	dependent GO term
macromolecule catabolic process	0.000394	0.285714	dependent GO term
endocytosis	0.000402	0.333333	dependent GO term
gliogenesis	0.000407	0.285714	dependent GO term
regionalization	0.000407	0.4	dependent GO term
regulation of behavior	0.000411	0.333333	dependent GO term
sterol metabolic process	0.000416	0.5	dependent GO term
cellular response to interleukin-6	0.00042	0.642857	dependent GO term
regulation of cellular component movement	0.00042	0.75	dependent GO term
vasculature development	0.000423	0.75	dependent GO term
mesenchymal to epithelial transition	0.000424	0.5	dependent GO term
regulation of metanephros development	0.000424	0.5	dependent GO term
metanephric glomerulus development	0.000424	0.5	dependent GO term
positive regulation of natural killer cell mediated immunity	0.000424	1	dependent GO term
positive regulation of natural killer cell mediated cytotoxicity	0.000424	1	dependent GO term
regulation of mast cell degranulation	0.000424	0.5	dependent GO term
regulation of T-helper 1 type immune response	0.000424	0.5	dependent GO term
negative regulation of locomotion	0.000426	0.333333	dependent GO term
establishment of protein localization to endoplasmic reticulum	0.000428	0.25	dependent GO term
ubiquitin-dependent protein catabolic process via the multivesicular body sorting pathway	0.000428	0.25	dependent GO term
response to interleukin-15	0.000428	1	dependent GO term
3'-UTR-mediated mRNA stabilization	0.000428	0	dependent GO term
follicle-stimulating hormone secretion	0.000428	0.666667	dependent GO term
ER overload response	0.000428	1	dependent GO term
bone maturation	0.000428	0.666667	dependent GO term
regulation of branching involved in salivary gland morphogenesis	0.000428	0.333333	dependent GO term
retrograde transport, vesicle recycling within Golgi	0.000428	0	dependent GO term
phosphorylation	0.000429	0.642857	dependent GO term
regulation of cAMP metabolic process	0.000429	0.75	dependent GO term
regulation of cyclic nucleotide biosynthetic process	0.000429	0.75	dependent GO term
regulation of MAPK cascade	0.000434	0.642857	dependent GO term
leukocyte homeostasis	0.000441	0.8	dependent GO term
cytokine-mediated signaling pathway	0.000449	1	dependent GO term
cytokine-mediated signaling pathway	0.000449	0.666667	dependent GO term
regulation of RNA metabolic process	0.000463	0.363636	dependent GO term
regulation of purine nucleotide biosynthetic process	0.000469	0.75	dependent GO term
positive regulation of activated T cell proliferation	0.000474	1	dependent GO term
lymphocyte chemotaxis	0.000474	1	dependent GO term
arachidonic acid secretion	0.000474	0.5	dependent GO term
regulation of mast cell activation involved in immune response	0.000474	0.5	dependent GO term
regulation of macrophage activation	0.000474	0.5	dependent GO term
response to virus	0.000481	0	dependent GO term
regulation of nucleotide biosynthetic process	0.000483	0.75	dependent GO term
positive regulation of immune response	0.000485	0.363636	dependent GO term
nuclear RNA surveillance	0.000485	0.2	dependent GO term
nuclear mRNA surveillance	0.000485	0.2	dependent GO term
regulation of organelle organization	0.000489	0	dependent GO term
response to lipoteichoic acid	0.000501	0.8	dependent GO term
cellular response to lipoteichoic acid	0.000501	0.8	dependent GO term
retrograde axon cargo transport	0.000501	0.25	dependent GO term
artery smooth muscle contraction	0.000501	0.75	dependent GO term
maternal process involved in parturition	0.000501	0.75	independent GO term
cellular macromolecular complex assembly	0.000512	0	dependent GO term
extrinsic apoptotic signaling pathway	0.000515	0.75	dependent GO term
RNA-dependent DNA replication	0.000523	0	dependent GO term
kinetochore organization	0.000523	0	dependent GO term
dichotomous subdivision of an epithelial terminal unit	0.000523	0.333333	dependent GO term
regulation of nuclease activity	0.000523	1	dependent GO term
beta-amyloid metabolic process	0.000523	0	dependent GO term
mesenchymal-epithelial cell signaling	0.000523	0.333333	dependent GO term
maturation of 5.8S rRNA	0.000523	0	dependent GO term
cell surface receptor signaling pathway involved in heart development	0.000527	0.333333	dependent GO term
toll-like receptor 4 signaling pathway	0.000527	0.5	dependent GO term
cardioblast differentiation	0.000527	0.5	dependent GO term
ribosomal large subunit biogenesis	0.000527	0	dependent GO term
dorsal spinal cord development	0.000527	0	dependent GO term
trophectodermal cell differentiation	0.000527	0	dependent GO term
cellular extravasation	0.000527	1	dependent GO term
secretion	0.000528	0.555556	independent GO term
protein modification by small protein conjugation	0.00053	0	dependent GO term
regulation of hemostasis	0.000539	0.833333	dependent GO term
regulation of blood coagulation	0.000539	0.833333	dependent GO term
G-protein coupled receptor signaling pathway, coupled to cyclic nucleotide second messenger	0.000541	0.6	dependent GO term
DNA duplex unwinding	0.000543	0.142857	dependent GO term
posttranscriptional regulation of gene expression	0.000547	0.4	dependent GO term
regulation of ion transport	0.000559	0.5	dependent GO term
cellular response to peptide hormone stimulus	0.000568	0.75	dependent GO term
negative regulation of growth	0.000577	0.333333	dependent GO term
post-anal tail morphogenesis	0.000582	0.333333	dependent GO term
protein localization to endoplasmic reticulum	0.000582	0	dependent GO term
regulation of glutamate secretion	0.000582	1	dependent GO term
metanephric epithelium development	0.000582	0.5	dependent GO term
modulation by host of symbiont transcription	0.000582	1	dependent GO term
modulation by host of viral transcription	0.000582	1	dependent GO term
regulation of intracellular estrogen receptor signaling pathway	0.000582	0	dependent GO term
positive regulation of blood vessel endothelial cell migration	0.000582	1	dependent GO term
regulation of immune response	0.000585	0.5	dependent GO term
regulation of transcription from RNA polymerase II promoter	0.000586	0.285714	dependent GO term
regulation of cellular component size	0.000586	0.333333	dependent GO term
reelin-mediated signaling pathway	0.000593	0.875	dependent GO term
macromolecular complex assembly	0.000597	0	dependent GO term
regulation of histone modification	0.000613	0.2	dependent GO term
gene silencing	0.000613	0.2	dependent GO term
regulation of neuron apoptotic process	0.000615	0	dependent GO term
DNA conformation change	0.000625	0	dependent GO term
telomere maintenance via telomere lengthening	0.000627	0	dependent GO term
chromatin disassembly	0.000627	0.333333	dependent GO term
protein-DNA complex disassembly	0.000627	0.333333	dependent GO term
nucleosome disassembly	0.000627	0.333333	dependent GO term
NADH metabolic process	0.000627	0	dependent GO term
chromatin disassembly	0.000627	0.333333	dependent GO term
protein-DNA complex disassembly	0.000627	0.333333	dependent GO term
nucleosome disassembly	0.000627	0.333333	dependent GO term
phosphatidylinositol-3-phosphate biosynthetic process	0.000627	0.666667	dependent GO term
regulation of blood volume by renin-angiotensin	0.000627	0.666667	dependent GO term
positive regulation of renal sodium excretion	0.000627	0.666667	dependent GO term
cellular response to interferon-beta	0.000627	0	dependent GO term
positive regulation of transcription from RNA polymerase II promoter	0.000638	0.5	dependent GO term
regulation of myotube differentiation	0.00064	0.666667	dependent GO term
ionotropic glutamate receptor signaling pathway	0.00064	0.5	dependent GO term
mesodermal cell fate commitment	0.00064	0	dependent GO term
mesonephros development	0.00064	0.5	dependent GO term
regulation of vascular endothelial growth factor receptor signaling pathway	0.00064	1	dependent GO term
modulation of transcription in other organism involved in symbiotic interaction	0.00064	1	dependent GO term
tetrapyrrole biosynthetic process	0.00064	0	dependent GO term
porphyrin-containing compound biosynthetic process	0.00064	0	dependent GO term
complement activation, classical pathway	0.00064	0.5	dependent GO term
regulation of leukocyte degranulation	0.00064	0.5	dependent GO term
regulation of signal transduction	0.000642	0.642857	dependent GO term
RNA biosynthetic process	0.000647	0.428571	dependent GO term
coenzyme metabolic process	0.000654	1	dependent GO term
protein localization	0.000661	0.555556	dependent GO term
regulation of coagulation	0.000662	0.833333	dependent GO term
modulation by organism of defense response of other organism involved in symbiotic interaction	0.000668	0.8	dependent GO term
positive regulation by organism of defense response of other organism involved in symbiotic interaction	0.000668	0.8	dependent GO term
modulation by symbiont of host defense response	0.000668	0.8	dependent GO term
positive regulation by symbiont of host defense response	0.000668	0.8	dependent GO term
modulation by organism of immune response of other organism involved in symbiotic interaction	0.000668	0.8	dependent GO term
modulation by organism of innate immune response in other organism involved in symbiotic interaction	0.000668	0.8	dependent GO term
pathogen-associated molecular pattern dependent modulation by organism of innate immune response in other organism involved in symbiotic interaction	0.000668	0.8	dependent GO term
positive regulation by organism of immune response of other organism involved in symbiotic interaction	0.000668	0.8	dependent GO term
positive regulation by organism of innate immune response in other organism involved in symbiotic interaction	0.000668	0.8	dependent GO term
pathogen-associated molecular pattern dependent induction by organism of innate immune response of other organism involved in symbiotic interaction	0.000668	0.8	dependent GO term
modulation by symbiont of host immune response	0.000668	0.8	dependent GO term
modulation by symbiont of host innate immune response	0.000668	0.8	dependent GO term
pathogen-associated molecular pattern dependent modulation by symbiont of host innate immune response	0.000668	0.8	dependent GO term
positive regulation by symbiont of host immune response	0.000668	0.8	dependent GO term
positive regulation by symbiont of host innate immune response	0.000668	0.8	dependent GO term
pathogen-associated molecular pattern dependent induction by symbiont of host innate immune response	0.000668	0.8	dependent GO term
negative regulation of interleukin-17 production	0.000668	0.8	dependent GO term
positive regulation of myeloid leukocyte cytokine production involved in immune response	0.000668	0.8	dependent GO term
Arp2/3 complex-mediated actin nucleation	0.000668	0	dependent GO term
tonic smooth muscle contraction	0.000668	0.75	dependent GO term
granulocyte macrophage colony-stimulating factor production	0.000668	0.5	independent GO term
regulation of granulocyte macrophage colony-stimulating factor production	0.000668	0.5	dependent GO term
enzyme linked receptor protein signaling pathway	0.000673	0.75	dependent GO term
immune effector process	0.000675	0.5	dependent GO term
nucleic acid metabolic process	0.000685	0.363636	dependent GO term
cellular response to peptide	0.000685	0.75	dependent GO term
startle response	0.000701	0.5	dependent GO term
metanephric nephron morphogenesis	0.000701	0.5	dependent GO term
regulation of natural killer cell mediated immunity	0.000701	1	dependent GO term
regulation of natural killer cell mediated cytotoxicity	0.000701	1	dependent GO term
regulation of lymphocyte migration	0.000701	1	dependent GO term
replacement ossification	0.000701	1	independent GO term
endochondral ossification	0.000701	1	dependent GO term
muscle contraction	0.000706	0.333333	dependent GO term
cyclic nucleotide biosynthetic process	0.000707	0.75	dependent GO term
cyclic purine nucleotide metabolic process	0.000707	0.75	dependent GO term
glucose metabolic process	0.000717	1	dependent GO term
RNA surveillance	0.000727	0.2	dependent GO term
platelet degranulation	0.000727	0.4	dependent GO term
negative regulation of histone H3-K9 methylation	0.000727	0.2	dependent GO term
production of molecular mediator of immune response	0.000733	0.333333	dependent GO term
regulation of potassium ion transmembrane transporter activity	0.000741	0.25	dependent GO term
disruption of cells of other organism involved in symbiotic interaction	0.000741	0.666667	dependent GO term
killing of cells in other organism involved in symbiotic interaction	0.000741	0.666667	dependent GO term
semaphorin-plexin signaling pathway	0.000741	0.333333	dependent GO term
regulation of gonadotropin secretion	0.000741	0.666667	dependent GO term
regulation of transcription from RNA polymerase II promoter involved in heart development	0.000741	0.666667	dependent GO term
physiological muscle hypertrophy	0.000741	0.666667	dependent GO term
physiological cardiac muscle hypertrophy	0.000741	0.666667	dependent GO term
cell growth involved in cardiac muscle cell development	0.000741	0.666667	dependent GO term
cell adhesion	0.000742	0.666667	dependent GO term
exocytosis	0.000749	0	dependent GO term
biological adhesion	0.000756	0.666667	independent GO term
reciprocal DNA recombination	0.000765	0	dependent GO term
reciprocal meiotic recombination	0.000765	0	dependent GO term
skeletal muscle contraction	0.000765	1	dependent GO term
branching involved in salivary gland morphogenesis	0.000765	1	dependent GO term
regulation of astrocyte differentiation	0.000765	0.5	dependent GO term
negative regulation of glial cell differentiation	0.000765	0.5	dependent GO term
negative regulation of lipid transport	0.000765	0.5	dependent GO term
regulation of fatty acid transport	0.000765	0.5	dependent GO term
membrane hyperpolarization	0.000765	0.5	dependent GO term
negative regulation of interferon-gamma production	0.000765	0.5	dependent GO term
hypothalamus development	0.000765	0.5	dependent GO term
skeletal muscle contraction	0.000765	0.5	dependent GO term
cell activation	0.000767	0.75	independent GO term
regulation of B cell mediated immunity	0.000772	0.5	dependent GO term
regulation of immunoglobulin mediated immune response	0.000772	0.5	dependent GO term
regulation of transcription from RNA polymerase II promoter	0.00078	0.4	dependent GO term
regulation of cell proliferation	0.00078	0.4	independent GO term
transcription from RNA polymerase II promoter	0.000783	0.285714	dependent GO term
regulation of neuron death	0.000783	0	dependent GO term
purine ribonucleotide biosynthetic process	0.000794	1	dependent GO term
regulation of cell morphogenesis involved in differentiation	0.000794	0.333333	dependent GO term
regulation of cyclic nucleotide metabolic process	0.000801	0.75	dependent GO term
cAMP metabolic process	0.000801	0.75	dependent GO term
chordate embryonic development	0.000823	0.285714	dependent GO term
cardiac atrium morphogenesis	0.000832	0.333333	dependent GO term
Golgi to plasma membrane protein transport	0.000832	0.5	dependent GO term
protein localization to chromosome	0.000832	0	dependent GO term
positive regulation of calcium-mediated signaling	0.000832	1	dependent GO term
protein localization to chromosome	0.000832	0	dependent GO term
negative regulation of intracellular steroid hormone receptor signaling pathway	0.000832	0	dependent GO term
cellular macromolecule biosynthetic process	0.000833	0.363636	dependent GO term
regulation of cellular protein metabolic process	0.000833	0	dependent GO term
production of siRNA involved in RNA interference	0.000838	0.3	dependent GO term
regulation of catalytic activity	0.000849	0.642857	dependent GO term
immune response-activating cell surface receptor signaling pathway	0.000853	0.4	dependent GO term
regulation of chromatin organization	0.000853	0.2	dependent GO term
microglial cell activation involved in immune response	0.000859	0.8	dependent GO term
response to immune response of other organism involved in symbiotic interaction	0.000859	0.8	dependent GO term
response to host immune response	0.000859	0.8	dependent GO term
positive regulation of odontogenesis	0.000859	0.75	dependent GO term
regulation of telomere maintenance	0.000864	0	dependent GO term
positive regulation of viral genome replication	0.000864	0.333333	dependent GO term
response to fungicide	0.000864	0.333333	dependent GO term
peptide hormone processing	0.000864	0.666667	dependent GO term
maturation of SSU-rRNA from tricistronic rRNA transcript (SSU-rRNA, 5.8S rRNA, LSU-rRNA)	0.000864	0	dependent GO term
purine nucleotide biosynthetic process	0.000877	1	dependent GO term
proteasomal protein catabolic process	0.000879	0	dependent GO term
ameboidal cell migration	0.000889	0.333333	dependent GO term
positive regulation of cytokine biosynthetic process	0.000893	0.428571	dependent GO term
embryo development ending in birth or egg hatching	0.000893	0.285714	dependent GO term
regulation of cellular macromolecule biosynthetic process	0.000896	0.363636	dependent GO term
lipid transport	0.000898	0.875	dependent GO term
regulation of mast cell activation	0.000901	1	dependent GO term
regulation of activated T cell proliferation	0.000901	1	dependent GO term
protein K11-linked ubiquitination	0.000901	0	dependent GO term
regulation of cardiac muscle cell action potential	0.000901	1	dependent GO term
very long-chain fatty acid metabolic process	0.000901	0.5	dependent GO term
tricarboxylic acid cycle	0.000901	0	independent GO term
regulation of mast cell activation	0.000901	0.5	dependent GO term
regulation of ATPase activity	0.000901	1	dependent GO term
organelle localization	0.000902	0	dependent GO term
neuron apoptotic process	0.000914	0	dependent GO term
MAPK cascade	0.000925	0.642857	dependent GO term
ribonucleotide biosynthetic process	0.00094	1	dependent GO term
activation of MAPK activity	0.000946	0.5	dependent GO term
DNA geometric change	0.000957	0.142857	dependent GO term
purine-containing compound biosynthetic process	0.000966	1	dependent GO term
maternal placenta development	0.000973	0.25	dependent GO term
ventricular septum morphogenesis	0.000973	0.333333	dependent GO term
branching involved in mammary gland duct morphogenesis	0.000973	0.333333	dependent GO term
neuron recognition	0.000973	0	dependent GO term
ephrin receptor signaling pathway	0.000973	0	dependent GO term
mesodermal cell differentiation	0.000973	0	dependent GO term
cGMP biosynthetic process	0.000973	0.5	dependent GO term
metanephros morphogenesis	0.000973	0.5	dependent GO term
positive regulation of positive chemotaxis	0.000973	1	dependent GO term
cGMP biosynthetic process	0.000973	0	dependent GO term
peptide cross-linking	0.000973	0	dependent GO term
regulation of oligodendrocyte differentiation	0.000973	0.5	dependent GO term
regulation of cardiac muscle cell membrane potential	0.000973	1	dependent GO term
mast cell degranulation	0.000973	0.5	dependent GO term
ribose phosphate biosynthetic process	0.000979	1	dependent GO term
synaptic vesicle exocytosis	0.000987	0.555556	dependent GO term
response to interleukin-6	0.000995	0.642857	dependent GO term
ATP-dependent chromatin remodeling	0.000997	0.333333	dependent GO term
tricarboxylic acid metabolic process	0.000997	0	dependent GO term
negative chemotaxis	0.000997	0.333333	dependent GO term
axonal fasciculation	0.000997	0.333333	dependent GO term
maturation of SSU-rRNA	0.000997	0	dependent GO term
cellular response to organic substance	0.001	0.4	dependent GO term
heart development	0.00101	0.6	dependent GO term
cardiac ventricle development	0.00101	0.6	dependent GO term
B cell activation	0.00102	0.5	dependent GO term
rRNA catabolic process	0.00102	0.2	dependent GO term
nucleobase-containing compound metabolic process	0.00103	0.333333	dependent GO term
nuclear division	0.00103	0	dependent GO term
mitosis	0.00103	0	dependent GO term
nuclear division	0.00103	0.333333	dependent GO term
mitosis	0.00103	0.333333	dependent GO term
rRNA metabolic process	0.00104	0.2	dependent GO term
RNA catabolic process	0.00104	0.2	dependent GO term
adaptive immune response based on somatic recombination of immune receptors built from immunoglobulin superfamily domains	0.00105	0.5	dependent GO term
transmembrane receptor protein serine/threonine kinase signaling pathway	0.00105	0.666667	dependent GO term
negative regulation of fat cell differentiation	0.00105	0.333333	dependent GO term
regulation of skeletal muscle cell differentiation	0.00105	0.666667	dependent GO term
transmembrane receptor protein serine/threonine kinase signaling pathway	0.00105	0.666667	dependent GO term
hexose metabolic process	0.00105	1	dependent GO term
Golgi to plasma membrane transport	0.00105	0.5	dependent GO term
glutamate secretion	0.00105	1	dependent GO term
positive regulation of smooth muscle cell migration	0.00105	1	dependent GO term
middle ear morphogenesis	0.00105	0	dependent GO term
regulation of positive chemotaxis	0.00105	1	dependent GO term
regulation of viral transcription	0.00105	1	dependent GO term
protein O-linked glycosylation	0.00105	0.5	dependent GO term
epithelial tube branching involved in lung morphogenesis	0.00105	1	dependent GO term
negative regulation of homeostatic process	0.00105	0	dependent GO term
mast cell mediated immunity	0.00105	0.5	dependent GO term
regulation of myeloid leukocyte mediated immunity	0.00105	0.5	dependent GO term
mast cell activation involved in immune response	0.00105	0.5	dependent GO term
negative regulation of homeostatic process	0.00105	0	dependent GO term
macromolecule biosynthetic process	0.00106	0.363636	dependent GO term
lymphocyte activation	0.00106	0.5	dependent GO term
cellular response to molecule of bacterial origin	0.00106	0.8	dependent GO term
cell division	0.00107	0.142857	independent GO term
protein modification by small protein conjugation or removal	0.00107	0	dependent GO term
positive regulation of tumor necrosis factor biosynthetic process	0.00107	0.8	dependent GO term
regulation of macrophage cytokine production	0.00107	0.8	dependent GO term
asymmetric cell division	0.00107	0	dependent GO term
centrosome localization	0.00107	0.25	dependent GO term
histamine secretion	0.00107	0.75	dependent GO term
protein folding	0.00109	0.2	dependent GO term
transcription from RNA polymerase II promoter	0.00109	0.4	dependent GO term
cytokinesis	0.00111	0.166667	dependent GO term
microtubule-based movement	0.00113	0.25	dependent GO term
cardiac atrium development	0.00113	0.333333	dependent GO term
regulation of establishment of planar polarity	0.00113	0.333333	dependent GO term
dopamine transport	0.00113	0.5	dependent GO term
natural killer cell mediated immunity	0.00113	1	dependent GO term
natural killer cell mediated cytotoxicity	0.00113	1	dependent GO term
viral transcription	0.00113	1	dependent GO term
regulation of metaphase/anaphase transition of cell cycle	0.00113	0	dependent GO term
regulation of mitotic metaphase/anaphase transition	0.00113	0	dependent GO term
regulation of organelle assembly	0.00113	0	dependent GO term
regulation of macromolecule biosynthetic process	0.00114	0.363636	dependent GO term
cell cycle	0.00114	0	independent GO term
regulation of potassium ion transmembrane transport	0.00114	0.25	dependent GO term
2-oxoglutarate metabolic process	0.00114	0	dependent GO term
gonadotropin secretion	0.00114	0.666667	dependent GO term
attachment of spindle microtubules to kinetochore	0.00114	0.333333	dependent GO term
phasic smooth muscle contraction	0.00114	0.333333	dependent GO term
behavioral response to pain	0.00114	0.333333	dependent GO term
cofactor metabolic process	0.00115	1	independent GO term
negative regulation of ubiquitin-protein ligase activity involved in mitotic cell cycle	0.00118	0	dependent GO term
negative regulation of mitotic anaphase-promoting complex activity	0.00118	0	dependent GO term
regulation of blood vessel size	0.00118	0.75	dependent GO term
positive regulation of metabolic process	0.0012	0.642857	dependent GO term
regulation of tube size	0.00121	0.75	dependent GO term
axis elongation	0.00121	0.333333	dependent GO term
cellular response to calcium ion	0.00121	0.333333	dependent GO term
dopamine metabolic process	0.00121	0.5	dependent GO term
regulation of amino acid transport	0.00121	1	dependent GO term
ceramide biosynthetic process	0.00121	0	dependent GO term
negative regulation of gliogenesis	0.00121	0.5	dependent GO term
regulation of calcium ion transmembrane transporter activity	0.00121	0.5	dependent GO term
icosanoid secretion	0.00121	0.5	dependent GO term
intracellular estrogen receptor signaling pathway	0.00121	0	dependent GO term
positive regulation of transcription from RNA polymerase II promoter	0.00122	0.4	dependent GO term
muscle system process	0.00124	0.333333	independent GO term
negative regulation of cAMP-dependent protein kinase activity	0.00125	0.333333	dependent GO term
neuron death	0.00127	0	dependent GO term
organ development	0.00129	0.285714	dependent GO term
cellular response to epidermal growth factor stimulus	0.00129	0.8	dependent GO term
ovulation from ovarian follicle	0.00129	0.75	dependent GO term
gastrulation with mouth forming second	0.00129	0.333333	dependent GO term
negative regulation of hemostasis	0.00129	1	dependent GO term
negative regulation of blood coagulation	0.00129	1	dependent GO term
regulation of norepinephrine secretion	0.00129	0.666667	dependent GO term
regulation of systemic arterial blood pressure by circulatory renin-angiotensin	0.00129	0.666667	dependent GO term
vesicle targeting	0.00129	0	independent GO term
positive regulation of multicellular organism growth	0.00129	0.5	dependent GO term
epithelial cell differentiation involved in kidney development	0.00129	0.5	dependent GO term
regulation of cardiac muscle cell proliferation	0.00129	0.5	dependent GO term
modification by host of symbiont morphology or physiology	0.00129	1	dependent GO term
positive regulation of organic acid transport	0.00129	0.5	dependent GO term
blastocyst formation	0.00129	0	dependent GO term
positive regulation of chemokine production	0.00129	0.5	dependent GO term
T-helper 1 type immune response	0.00129	0.5	dependent GO term
inner ear morphogenesis	0.0013	0.4	dependent GO term
immune response-regulating cell surface receptor signaling pathway	0.0013	0.4	dependent GO term
regulation of synaptic transmission	0.0013	1	dependent GO term
regulation of synaptic transmission	0.0013	0.666667	dependent GO term
response to defenses of other organism involved in symbiotic interaction	0.00131	0.8	dependent GO term
response to host	0.00131	0.8	dependent GO term
response to host defenses	0.00131	0.8	dependent GO term
macrophage cytokine production	0.00131	0.8	dependent GO term
response to peptidoglycan	0.00131	1	dependent GO term
type I interferon biosynthetic process	0.00131	1	dependent GO term
translesion synthesis	0.00131	0	dependent GO term
mitochondrion organization	0.00131	0.333333	dependent GO term
regulation of MAPK cascade	0.00132	0.5	dependent GO term
pattern specification process	0.00132	0.4	dependent GO term
response to endogenous stimulus	0.00134	0.4	independent GO term
DNA recombination	0.00134	0	dependent GO term
protein homooligomerization	0.00135	0.333333	dependent GO term
protein homooligomerization	0.00135	0.333333	dependent GO term
positive regulation of immune system process	0.00136	0.5	dependent GO term
establishment of localization in cell	0.00136	0.555556	independent GO term
peripheral nervous system development	0.00136	0.285714	dependent GO term
positive regulation of intracellular estrogen receptor signaling pathway	0.00136	0.8	dependent GO term
cellular response to sterol depletion	0.00136	0.6	dependent GO term
SREBP signaling pathway	0.00136	0.6	dependent GO term
morphogenesis of an epithelial sheet	0.00137	0.333333	dependent GO term
T cell homeostasis	0.00137	1	dependent GO term
activated T cell proliferation	0.00137	1	dependent GO term
lymphocyte migration	0.00137	1	dependent GO term
metaphase/anaphase transition of cell cycle	0.00137	0	dependent GO term
metaphase/anaphase transition of mitotic cell cycle	0.00137	0	dependent GO term
morphogenesis of an epithelial sheet	0.00137	1	dependent GO term
morphogenesis of an epithelial sheet	0.00137	1	dependent GO term
one-carbon metabolic process	0.00137	1	dependent GO term
regulation of protein modification process	0.00138	0.642857	dependent GO term
positive regulation of cell proliferation	0.00138	0.285714	dependent GO term
cardiac chamber morphogenesis	0.00138	0.6	dependent GO term
monosaccharide metabolic process	0.00138	1	dependent GO term
regulation of proteasomal protein catabolic process	0.0014	0.166667	dependent GO term
development of primary sexual characteristics	0.0014	0.666667	dependent GO term
nucleobase-containing compound biosynthetic process	0.00141	0.428571	dependent GO term
adaptive immune response	0.00142	0.5	dependent GO term
cellular response to biotic stimulus	0.00143	0.8	dependent GO term
regulation of primary metabolic process	0.00144	0.642857	dependent GO term
S phase	0.00145	0.666667	dependent GO term
negative regulation of striated muscle tissue development	0.00145	0.666667	dependent GO term
norepinephrine secretion	0.00145	0.666667	dependent GO term
response to interferon-beta	0.00145	0	dependent GO term
protein sumoylation	0.00146	0.25	dependent GO term
organelle fission	0.00146	0	dependent GO term
organelle fission	0.00146	0.333333	dependent GO term
negative regulation of coagulation	0.00146	1	dependent GO term
response to iron ion	0.00146	0.5	dependent GO term
nephron morphogenesis	0.00146	0.5	dependent GO term
multicellular organismal movement	0.00146	1	independent GO term
musculoskeletal movement	0.00146	1	dependent GO term
multicellular organismal movement	0.00146	0.5	independent GO term
musculoskeletal movement	0.00146	0.5	dependent GO term
amide biosynthetic process	0.00146	0	dependent GO term
negative regulation of cyclic nucleotide metabolic process	0.00146	0.5	dependent GO term
negative regulation of cAMP metabolic process	0.00146	0.5	dependent GO term
GPI anchor biosynthetic process	0.00146	0	dependent GO term
multicellular organismal movement	0.00146	0.5	independent GO term
musculoskeletal movement	0.00146	0.5	dependent GO term
heterocycle metabolic process	0.00149	0.333333	independent GO term
macromolecular complex subunit organization	0.0015	0	independent GO term
rhythmic process	0.0015	0.333333	independent GO term
translation	0.00151	0.25	dependent GO term
calcium ion transport	0.00155	1	dependent GO term
gene expression	0.00156	0.363636	independent GO term
establishment of planar polarity	0.00156	0.333333	dependent GO term
positive regulation of leukocyte mediated cytotoxicity	0.00156	1	dependent GO term
fatty acid derivative transport	0.00156	0.5	dependent GO term
icosanoid transport	0.00156	0.5	dependent GO term
positive regulation of nitric-oxide synthase biosynthetic process	0.00157	0.8	dependent GO term
I-kappaB phosphorylation	0.00157	0.8	dependent GO term
histone H2A acetylation	0.00157	0.25	dependent GO term
actin nucleation	0.00157	0	dependent GO term
histamine transport	0.00157	0.75	dependent GO term
cellular aromatic compound metabolic process	0.00159	0.333333	independent GO term
RNA processing	0.00159	0	dependent GO term
ubiquitin-dependent protein catabolic process	0.00161	0	dependent GO term
lipid localization	0.00162	0.875	dependent GO term
GTP catabolic process	0.00162	0.25	dependent GO term
negative regulation of muscle tissue development	0.00162	0.666667	dependent GO term
meiotic chromosome segregation	0.00162	0	dependent GO term
negative regulation of JNK cascade	0.00162	0.333333	dependent GO term
regulation of cardiac muscle cell differentiation	0.00162	0.666667	dependent GO term
regulation of osteoblast proliferation	0.00162	0.666667	dependent GO term
neurological system process involved in regulation of systemic arterial blood pressure	0.00162	0.666667	independent GO term
intra-Golgi vesicle-mediated transport	0.00162	0	dependent GO term
neuromuscular synaptic transmission	0.00162	0.333333	dependent GO term
macromolecular complex remodeling	0.00162	0.666667	dependent GO term
protein-lipid complex remodeling	0.00162	0.666667	dependent GO term
plasma lipoprotein particle remodeling	0.00162	0.666667	dependent GO term
induction of programmed cell death	0.00164	0	dependent GO term
establishment of tissue polarity	0.00165	0.333333	dependent GO term
positive regulation of tumor necrosis factor production	0.00165	0.5	dependent GO term
synaptic transmission, GABAergic	0.00165	1	dependent GO term
cell fate commitment involved in formation of primary germ layer	0.00165	0	dependent GO term
positive regulation of tumor necrosis factor production	0.00165	1	dependent GO term
salivary gland morphogenesis	0.00165	1	dependent GO term
aromatic compound biosynthetic process	0.00166	0.428571	dependent GO term
regulation of immune system process	0.00166	0.75	independent GO term
stem cell differentiation	0.00166	0.666667	dependent GO term
regulation of cellular metabolic process	0.00167	0.642857	dependent GO term
heterocycle biosynthetic process	0.00167	0.428571	dependent GO term
interleukin-4-mediated signaling pathway	0.00168	0.5	dependent GO term
guanosine-containing compound catabolic process	0.00168	0.25	dependent GO term
regulation of wound healing	0.00169	0.833333	dependent GO term
vascular process in circulatory system	0.00171	0.75	dependent GO term
modification-dependent protein catabolic process	0.00172	0	dependent GO term
nucleotide biosynthetic process	0.00172	1	dependent GO term
regulation of neuron projection development	0.00172	0.333333	dependent GO term
negative regulation of fibrinolysis	0.00174	0.833333	dependent GO term
response to sterol depletion	0.00174	0.6	dependent GO term
histone H3-K27 methylation	0.00174	0.2	dependent GO term
regulation of histone H3-K9 methylation	0.00174	0.2	dependent GO term
cyclic nucleotide metabolic process	0.00174	0.75	dependent GO term
regulation of transmission of nerve impulse	0.00174	1	dependent GO term
regulation of transmission of nerve impulse	0.00174	0.666667	dependent GO term
regulation of B cell mediated immunity	0.00175	1	dependent GO term
regulation of immunoglobulin mediated immune response	0.00175	1	dependent GO term
regulation of calcium-mediated signaling	0.00175	1	dependent GO term
porphyrin-containing compound metabolic process	0.00175	0	dependent GO term
protein K48-linked ubiquitination	0.00175	0.5	dependent GO term
humoral immune response mediated by circulating immunoglobulin	0.00175	0.5	dependent GO term
negative regulation of purine nucleotide metabolic process	0.00175	0.5	dependent GO term
membrane protein ectodomain proteolysis	0.00175	1	dependent GO term
GPI anchor metabolic process	0.00175	0	dependent GO term
nucleoside phosphate biosynthetic process	0.00176	1	dependent GO term
regulation of cellular biosynthetic process	0.00177	0.363636	dependent GO term
receptor-mediated endocytosis	0.00178	0.333333	dependent GO term
modification-dependent macromolecule catabolic process	0.00178	0	dependent GO term
regulation of protein metabolic process	0.0018	0	dependent GO term
negative regulation of muscle organ development	0.0018	0.666667	dependent GO term
modulation of growth of symbiont involved in interaction with host	0.0018	0.666667	dependent GO term
regulation of growth of symbiont in host	0.0018	0.666667	dependent GO term
negative regulation of growth of symbiont involved in interaction with host	0.0018	0.666667	dependent GO term
negative regulation of growth of symbiont in host	0.0018	0.666667	dependent GO term
regulation of receptor recycling	0.0018	0.333333	dependent GO term
macromolecule localization	0.00181	0.555556	independent GO term
immune response	0.00182	0.75	dependent GO term
regulation of cell growth	0.00182	0.333333	dependent GO term
purine ribonucleoside metabolic process	0.00184	0.2	dependent GO term
regulation of blood pressure	0.00184	0.75	independent GO term
divalent metal ion transport	0.00184	1	dependent GO term
mitotic cell cycle	0.00185	0.166667	dependent GO term
adenylate cyclase-inhibiting G-protein coupled receptor signaling pathway	0.00185	1	dependent GO term
post-Golgi vesicle-mediated transport	0.00185	0.5	dependent GO term
interaction with symbiont	0.00185	1	independent GO term
polyol biosynthetic process	0.00185	0	dependent GO term
leukocyte cell-cell adhesion	0.00185	1	dependent GO term
adenylate cyclase-inhibiting G-protein coupled receptor signaling pathway	0.00185	1	dependent GO term
retrograde vesicle-mediated transport, Golgi to ER	0.00186	0	dependent GO term
microglial cell activation	0.00186	0.8	dependent GO term
vesicle transport along microtubule	0.00186	0.25	dependent GO term
regulation of angiogenesis	0.00187	0.75	dependent GO term
somatic diversification of immunoglobulins involved in immune response	0.00188	0.333333	dependent GO term
somatic recombination of immunoglobulin genes involved in immune response	0.00188	0.333333	dependent GO term
isotype switching	0.00188	0.333333	dependent GO term
GTP metabolic process	0.00188	0.25	dependent GO term
purine nucleoside metabolic process	0.0019	0.2	dependent GO term
divalent inorganic cation transport	0.0019	1	dependent GO term
sex differentiation	0.0019	0.666667	dependent GO term
myeloid cell differentiation	0.0019	0.333333	dependent GO term
cellular nitrogen compound biosynthetic process	0.00191	0.428571	dependent GO term
response to wounding	0.00194	0.5	dependent GO term
positive regulation of mesenchymal cell proliferation	0.00195	0.333333	dependent GO term
mammary gland duct morphogenesis	0.00195	0.333333	dependent GO term
complement activation	0.00195	0.666667	dependent GO term
activation of MAPKK activity	0.00195	1	dependent GO term
cell differentiation involved in kidney development	0.00195	0.5	dependent GO term
regulation of vasodilation	0.00195	0.5	dependent GO term
regulation of leukocyte mediated cytotoxicity	0.00195	1	dependent GO term
negative regulation of viral process	0.00195	1	dependent GO term
complement activation	0.00195	1	dependent GO term
complement activation	0.00195	0.5	dependent GO term
sodium ion transmembrane transport	0.00195	1	dependent GO term
positive regulation of lipid transport	0.00195	0.5	dependent GO term
potassium ion transmembrane transport	0.00195	1	dependent GO term
peroxisome organization	0.00195	0.5	dependent GO term
complement activation	0.00195	0.5	dependent GO term
leukocyte mediated immunity	0.00196	0.5	dependent GO term
negative regulation of immune system process	0.00196	0.5	dependent GO term
cytoskeleton organization	0.00196	0	dependent GO term
protein polyubiquitination	0.00198	0.4	dependent GO term
protein localization to endoplasmic reticulum	0.00199	0.25	dependent GO term
disruption of cells of other organism	0.00199	0.666667	dependent GO term
killing of cells of other organism	0.00199	0.666667	dependent GO term
positive regulation of Notch signaling pathway	0.00199	0.333333	dependent GO term
positive regulation of membrane potential	0.00199	1	dependent GO term
norepinephrine transport	0.00199	0.666667	dependent GO term
renal sodium excretion	0.00199	0.666667	dependent GO term
regulation of renal sodium excretion	0.00199	0.666667	dependent GO term
regulation of biosynthetic process	0.00201	0.363636	dependent GO term
tube development	0.00201	0.4	dependent GO term
tube development	0.00201	0.6	dependent GO term
regulation of nucleobase-containing compound metabolic process	0.00202	0.363636	dependent GO term
intracellular signal transduction	0.00202	0.363636	independent GO term
organic substance transport	0.00204	0.555556	independent GO term
guanosine-containing compound metabolic process	0.00204	0.25	dependent GO term
microtubule cytoskeleton organization	0.00204	0.333333	dependent GO term
anterior/posterior axis specification	0.00205	0.333333	dependent GO term
peptidyl-tyrosine dephosphorylation	0.00205	0.666667	dependent GO term
response to cocaine	0.00205	0.5	dependent GO term
regulation of synaptic transmission, glutamatergic	0.00205	1	dependent GO term
cellular response to ionizing radiation	0.00205	0	dependent GO term
epithelial cell morphogenesis	0.00205	0.5	dependent GO term
regulation of cardiac muscle tissue growth	0.00205	0.5	dependent GO term
cellular potassium ion transport	0.00205	0.5	dependent GO term
cellular potassium ion transport	0.00205	1	dependent GO term
leukocyte degranulation	0.00205	0.5	dependent GO term
regulation of blood vessel endothelial cell migration	0.00205	1	dependent GO term
cellular nitrogen compound metabolic process	0.00206	0.333333	dependent GO term
DNA metabolic process	0.00208	0	dependent GO term
DNA metabolic process	0.00208	0	dependent GO term
cardiac chamber development	0.00209	0.6	dependent GO term
regulation of gene expression	0.0021	0.363636	dependent GO term
organic cyclic compound biosynthetic process	0.00214	0.428571	dependent GO term
apoptotic process	0.00214	0.333333	dependent GO term
regulation of chromosome organization	0.00214	0.2	dependent GO term
face development	0.00216	0.333333	dependent GO term
response to vitamin D	0.00216	1	dependent GO term
vascular endothelial growth factor receptor signaling pathway	0.00216	0.5	dependent GO term
cardiac muscle cell proliferation	0.00216	0.5	dependent GO term
vascular endothelial growth factor receptor signaling pathway	0.00216	1	dependent GO term
negative regulation of nucleotide metabolic process	0.00216	0.5	dependent GO term
negative regulation of chromosome organization	0.00216	0	dependent GO term
aerobic respiration	0.00216	0	dependent GO term
positive regulation of endothelial cell migration	0.00216	1	dependent GO term
macrophage activation	0.00216	0.5	dependent GO term
negative regulation of chromosome organization	0.00216	0	dependent GO term
chromatin organization	0.00217	0	dependent GO term
macrophage activation involved in immune response	0.00217	0.8	dependent GO term
ribonucleoside metabolic process	0.00217	0.2	dependent GO term
negative regulation of endothelial cell apoptotic process	0.00217	0.75	dependent GO term
methylation-dependent chromatin silencing	0.00218	0.2	dependent GO term
muscle structure development	0.00218	0.6	dependent GO term
atrioventricular valve morphogenesis	0.00218	0.6	dependent GO term
ionotropic glutamate receptor signaling pathway	0.00219	0.333333	dependent GO term
positive regulation of tyrosine phosphorylation of Stat3 protein	0.00219	0	dependent GO term
positive regulation of branching involved in ureteric bud morphogenesis	0.00219	0.666667	dependent GO term
MAPK cascade	0.0022	0.5	dependent GO term
cell proliferation	0.00222	0.4	independent GO term
negative regulation of cell adhesion	0.00223	0.833333	dependent GO term
reproductive structure development	0.00224	0.666667	dependent GO term
ventricular septum development	0.00227	0.333333	dependent GO term
positive regulation of interleukin-6 production	0.00227	0.5	dependent GO term
positive regulation of histone modification	0.00227	0.5	dependent GO term
salivary gland development	0.00227	1	dependent GO term
sphingolipid biosynthetic process	0.00227	0	dependent GO term
regulation of cation channel activity	0.00227	0.5	dependent GO term
membrane protein proteolysis	0.00227	1	dependent GO term
regulation of interleukin-2 production	0.00227	1	dependent GO term
RNA export from nucleus	0.00227	0	dependent GO term
regulation of signaling	0.00229	0.642857	independent GO term
regulation of sequence-specific DNA binding transcription factor activity	0.00229	0.75	dependent GO term
circulatory system development	0.00229	0.75	dependent GO term
cardiovascular system development	0.00229	0.75	dependent GO term
regulation of neurological system process	0.00229	1	dependent GO term
regulation of neurological system process	0.00229	0.666667	dependent GO term
reproductive system development	0.00229	0.666667	dependent GO term
regulation of RNA biosynthetic process	0.0023	0.333333	dependent GO term
regulation of RNA biosynthetic process	0.0023	0.4	dependent GO term
programmed cell death	0.0023	0.333333	dependent GO term
regulation of nitrogen compound metabolic process	0.00231	0.363636	dependent GO term
regulation of cell communication	0.00232	0.642857	independent GO term
cell cycle process	0.00234	0	independent GO term
regulation of vasculature development	0.00236	0.75	dependent GO term
negative regulation of RNA metabolic process	0.00238	0.333333	dependent GO term
tissue morphogenesis	0.00238	0.6	dependent GO term
DNA repair	0.00238	0.333333	dependent GO term
DNA repair	0.00238	0	dependent GO term
morphogenesis of a polarized epithelium	0.00239	0.333333	dependent GO term
regulation of potassium ion transport	0.00239	0.5	dependent GO term
cGMP metabolic process	0.00239	0.5	dependent GO term
adenylate cyclase-activating G-protein coupled receptor signaling pathway	0.00239	1	dependent GO term
metanephric nephron development	0.00239	0.5	dependent GO term
cGMP metabolic process	0.00239	0	dependent GO term
mast cell activation	0.00239	1	dependent GO term
telomere maintenance	0.00239	0	dependent GO term
mast cell activation	0.00239	0.5	dependent GO term
telomere maintenance	0.00239	0	dependent GO term
ventricular cardiac muscle tissue morphogenesis	0.00239	1	dependent GO term
organic cyclic compound metabolic process	0.0024	0.333333	independent GO term
regulation of gene expression	0.0024	0.3	dependent GO term
proteolysis	0.0024	0.285714	independent GO term
response to virus	0.0024	1	dependent GO term
antigen processing and presentation of peptide antigen via MHC class I	0.0024	1	dependent GO term
neurotrophin TRK receptor signaling pathway	0.0024	0.666667	dependent GO term
regulation of activin receptor signaling pathway	0.0024	0.666667	dependent GO term
negative regulation of stress-activated protein kinase signaling cascade	0.0024	0.333333	dependent GO term
negative regulation of stress-activated MAPK cascade	0.0024	0.333333	dependent GO term
neurotrophin TRK receptor signaling pathway	0.0024	0.666667	dependent GO term
positive regulation of transcription from RNA polymerase II promoter	0.00241	0.285714	dependent GO term
regulation of JNK cascade	0.00243	0.5	dependent GO term
response to acid	0.00243	0.2	independent GO term
regulation of actin filament length	0.00246	0.4	dependent GO term
regulation of actin polymerization or depolymerization	0.00246	0.4	dependent GO term
regulation of immune response	0.00248	0.5	dependent GO term
response to hypoxia	0.00248	0.666667	dependent GO term
ear morphogenesis	0.00249	0.4	dependent GO term
regulation of striated muscle tissue development	0.00249	0.4	dependent GO term
regulation of mesenchymal cell proliferation	0.0025	0.333333	dependent GO term
protein activation cascade	0.0025	0.666667	independent GO term
striated muscle cell proliferation	0.0025	0.5	dependent GO term
regulation of heart growth	0.0025	0.5	dependent GO term
positive regulation of cell killing	0.0025	1	dependent GO term
tetrapyrrole metabolic process	0.0025	0	dependent GO term
protein activation cascade	0.0025	1	independent GO term
protein activation cascade	0.0025	0.5	independent GO term
telomere organization	0.0025	0	dependent GO term
endochondral bone morphogenesis	0.0025	1	dependent GO term
positive regulation of exocytosis	0.0025	0.5	dependent GO term
protein activation cascade	0.0025	0.5	independent GO term
telomere organization	0.0025	0	dependent GO term
nucleotide-excision repair	0.0025	0	dependent GO term
glycolipid biosynthetic process	0.0025	0	dependent GO term
regulation of excitatory postsynaptic membrane potential	0.0025	0	dependent GO term
tumor necrosis factor biosynthetic process	0.00251	0.8	dependent GO term
regulation of tumor necrosis factor biosynthetic process	0.00251	0.8	dependent GO term
negative regulation of translational initiation	0.00251	0.25	dependent GO term
azole transport	0.00251	0.75	dependent GO term
regulation of cell morphogenesis	0.00253	0.333333	dependent GO term
response to decreased oxygen levels	0.00255	0.666667	dependent GO term
regulation of membrane potential	0.00255	0.333333	independent GO term
RNA metabolic process	0.00256	0.428571	dependent GO term
negative regulation of transcription from RNA polymerase II promoter	0.00256	0.2	dependent GO term
defense response	0.00256	0.5	dependent GO term
response to lipopolysaccharide	0.00258	0.666667	dependent GO term
signal release	0.00258	0	dependent GO term
protein modification process	0.00259	0.666667	dependent GO term
cellular protein modification process	0.00259	0.666667	dependent GO term
regulation of muscle organ development	0.00261	0.4	dependent GO term
regulation of muscle tissue development	0.00261	0.4	dependent GO term
chromatin assembly	0.00261	0	dependent GO term
erythrocyte differentiation	0.00262	0.5	dependent GO term
autophagic vacuole assembly	0.00262	0.25	dependent GO term
branching involved in salivary gland morphogenesis	0.00262	0.333333	dependent GO term
cardiac septum morphogenesis	0.00262	0.333333	dependent GO term
osteoblast proliferation	0.00262	0.666667	dependent GO term
branching involved in salivary gland morphogenesis	0.00262	0.333333	dependent GO term
autophagic vacuole assembly	0.00262	0	dependent GO term
regulation of branching involved in ureteric bud morphogenesis	0.00262	0.666667	dependent GO term
regulation of excretion	0.00262	0.666667	dependent GO term
renal system process involved in regulation of systemic arterial blood pressure	0.00262	0.666667	dependent GO term
chronic inflammatory response	0.00262	0.666667	dependent GO term
transcription initiation from RNA polymerase II promoter	0.00262	0	dependent GO term
catechol-containing compound metabolic process	0.00262	0.5	dependent GO term
catecholamine metabolic process	0.00262	0.5	dependent GO term
defense response to Gram-positive bacterium	0.00262	0.5	dependent GO term
regulation of smooth muscle cell migration	0.00262	1	dependent GO term
cardiac septum morphogenesis	0.00262	0.5	dependent GO term
glutathione metabolic process	0.00262	1	dependent GO term
transcription initiation from RNA polymerase II promoter	0.00262	0	dependent GO term
long-chain fatty acid transport	0.00262	0.5	dependent GO term
long-chain fatty acid transport	0.00262	0.5	dependent GO term
regulation of translational initiation in response to stress	0.00267	0.4	dependent GO term
positive regulation of mast cell activation involved in immune response	0.00267	0.4	dependent GO term
positive regulation of mast cell degranulation	0.00267	0.4	dependent GO term
negative regulation of histone methylation	0.00267	0.2	dependent GO term
positive regulation of histone H3-K4 methylation	0.00267	0.2	dependent GO term
anatomical structure homeostasis	0.00268	0	independent GO term
anatomical structure homeostasis	0.00268	0.333333	independent GO term
cellular response to organonitrogen compound	0.00273	0.75	dependent GO term
positive regulation of ossification	0.00274	0.333333	dependent GO term
positive chemotaxis	0.00274	1	dependent GO term
DNA recombination	0.00275	0.333333	dependent GO term
synaptic vesicle docking involved in exocytosis	0.00279	0.555556	dependent GO term
cellular response to metal ion	0.00279	0.666667	dependent GO term
developmental growth	0.00279	0.333333	dependent GO term
cell adhesion	0.0028	0.714286	dependent GO term
nucleoside metabolic process	0.00283	0.2	dependent GO term
regeneration	0.00283	0.75	dependent GO term
growth involved in symbiotic interaction	0.00285	0.666667	dependent GO term
growth of symbiont involved in interaction with host	0.00285	0.666667	dependent GO term
growth of symbiont in host	0.00285	0.666667	dependent GO term
neurotrophin signaling pathway	0.00285	0.666667	dependent GO term
positive regulation of pathway-restricted SMAD protein phosphorylation	0.00285	0.666667	dependent GO term
regulation of chromosome segregation	0.00285	0.333333	independent GO term
positive regulation of pathway-restricted SMAD protein phosphorylation	0.00285	0.666667	dependent GO term
neurotrophin signaling pathway	0.00285	0.666667	dependent GO term
biological adhesion	0.00286	0.714286	independent GO term
nitric-oxide synthase biosynthetic process	0.00286	0.8	dependent GO term
regulation of nitric-oxide synthase biosynthetic process	0.00286	0.8	dependent GO term
MyD88-dependent toll-like receptor signaling pathway	0.00286	0.8	dependent GO term
myeloid leukocyte cytokine production	0.00286	0.8	dependent GO term
MyD88-dependent toll-like receptor signaling pathway	0.00286	1	dependent GO term
attachment of spindle microtubules to kinetochore	0.00286	0	dependent GO term
nuclear envelope organization	0.00286	0.25	dependent GO term
positive regulation of neutrophil chemotaxis	0.00286	0.75	dependent GO term
positive regulation of muscle hypertrophy	0.00286	0.75	dependent GO term
positive regulation of cardiac muscle hypertrophy	0.00286	0.75	dependent GO term
parturition	0.00286	0.75	independent GO term
regulation of RNA metabolic process	0.00287	0.333333	dependent GO term
regulation of RNA metabolic process	0.00287	0.4	dependent GO term
proteolysis involved in cellular protein catabolic process	0.00287	0	dependent GO term
response to molecule of bacterial origin	0.00287	0.666667	dependent GO term
genitalia development	0.00287	0.333333	dependent GO term
kidney morphogenesis	0.00287	0.5	dependent GO term
ventricular cardiac muscle tissue development	0.00287	1	dependent GO term
phosphate-containing compound metabolic process	0.00288	0.666667	dependent GO term
cell migration	0.00288	0.75	dependent GO term
cellular response to cytokine stimulus	0.00292	1	dependent GO term
cellular response to cytokine stimulus	0.00292	0.666667	dependent GO term
cellular response to cytokine stimulus	0.00292	0	dependent GO term
regulation of RNA biosynthetic process	0.00294	0.5	dependent GO term
regulation of cytokine biosynthetic process	0.00295	0.428571	dependent GO term
cell division	0.00295	0.333333	independent GO term
regulation of ubiquitin-protein ligase activity involved in mitotic cell cycle	0.00296	0	dependent GO term
microtubule anchoring at microtubule organizing center	0.00296	0.25	dependent GO term
endocytosis	0.00297	1	dependent GO term
regulation of cAMP-dependent protein kinase activity	0.00299	0.333333	dependent GO term
regulation of anatomical structure size	0.003	0.333333	independent GO term
regulation of cell projection organization	0.003	0.333333	dependent GO term
heart looping	0.003	0.333333	dependent GO term
pituitary gland development	0.003	0.5	dependent GO term
heart looping	0.003	0.5	dependent GO term
pituitary gland development	0.003	0.5	dependent GO term
regulation of cell killing	0.003	1	independent GO term
regulated secretory pathway	0.003	0.5	dependent GO term
interleukin-2 production	0.003	1	independent GO term
pituitary gland development	0.003	0.5	dependent GO term
positive regulation of GTPase activity	0.00301	0.4	dependent GO term
cell death	0.00304	0.333333	dependent GO term
cellular response to chemical stimulus	0.00307	0.4	independent GO term
cellular response to chemical stimulus	0.00307	0.8	independent GO term
positive regulation of cell activation	0.00307	0.75	dependent GO term
regulation of DNA recombination	0.00309	0.333333	dependent GO term
immunoglobulin production involved in immunoglobulin mediated immune response	0.00309	0.333333	dependent GO term
death	0.00309	0.333333	independent GO term
positive regulation of cyclase activity	0.00309	1	dependent GO term
tricarboxylic acid cycle	0.00309	0	independent GO term
tricarboxylic acid cycle	0.00309	1	independent GO term
myotube differentiation	0.00313	0.666667	dependent GO term
smooth muscle cell migration	0.00313	1	dependent GO term
positive regulation of cellular carbohydrate metabolic process	0.00313	1	dependent GO term
astrocyte differentiation	0.00313	0.5	dependent GO term
regulation of intracellular steroid hormone receptor signaling pathway	0.00313	0	dependent GO term
histone deacetylation	0.00313	1	dependent GO term
cardiac chamber morphogenesis	0.00314	0.5	dependent GO term
nucleic acid metabolic process	0.00315	0.4	dependent GO term
negative regulation of immune response	0.00315	0.5	dependent GO term
response to oxygen levels	0.00317	0.666667	dependent GO term
response to lipid	0.00319	1	dependent GO term
regulation of phosphorylation	0.0032	0.857143	dependent GO term
outflow tract septum morphogenesis	0.0032	0.4	dependent GO term
positive regulation of intracellular steroid hormone receptor signaling pathway	0.0032	0.8	dependent GO term
positive regulation of leukocyte degranulation	0.0032	0.4	dependent GO term
neutrophil activation involved in immune response	0.0032	0.4	dependent GO term
atrioventricular valve development	0.0032	0.6	dependent GO term
positive regulation of kinase activity	0.00322	0.642857	dependent GO term
protein complex assembly	0.00322	0	dependent GO term
macromolecule modification	0.00323	0.666667	independent GO term
regulation of interleukin-17 production	0.00324	0.8	dependent GO term
circadian regulation of gene expression	0.00324	0.75	dependent GO term
positive regulation of granulocyte chemotaxis	0.00324	0.75	dependent GO term
vascular smooth muscle contraction	0.00324	0.75	dependent GO term
positive regulation of RNA metabolic process	0.00325	0.5	dependent GO term
protein complex biogenesis	0.00325	0	dependent GO term
phosphorus metabolic process	0.00326	0.666667	independent GO term
cell-substrate adhesion	0.00326	0.75	dependent GO term
positive regulation of chromosome organization	0.00326	0.5	dependent GO term
lung morphogenesis	0.00326	1	dependent GO term
positive regulation of chromosome organization	0.00326	0	dependent GO term
establishment of protein localization to plasma membrane	0.00326	0	dependent GO term
regulation of chemokine production	0.00326	0.5	dependent GO term
regulation of postsynaptic membrane potential	0.00326	0	dependent GO term
protein phosphorylation	0.00327	0.642857	dependent GO term
cellular protein catabolic process	0.00327	0	dependent GO term
glycosyl compound metabolic process	0.0033	0.2	independent GO term
neuron recognition	0.00333	0.333333	dependent GO term
RNA stabilization	0.00333	0	dependent GO term
mRNA stabilization	0.00333	0	dependent GO term
intrinsic apoptotic signaling pathway in response to endoplasmic reticulum stress	0.00333	1	dependent GO term
receptor recycling	0.00333	0.333333	dependent GO term
regulation of tyrosine phosphorylation of Stat3 protein	0.00333	0	dependent GO term
regulation of glucan biosynthetic process	0.00333	0.666667	dependent GO term
regulation of glycogen biosynthetic process	0.00333	0.666667	dependent GO term
regulation of systemic arterial blood pressure by renin-angiotensin	0.00333	0.666667	dependent GO term
plasma lipoprotein particle organization	0.00333	0.666667	dependent GO term
protein ubiquitination	0.00337	0	dependent GO term
determination of heart left/right asymmetry	0.0034	0.333333	dependent GO term
cardiac cell development	0.0034	0.666667	dependent GO term
determination of heart left/right asymmetry	0.0034	0.5	dependent GO term
positive regulation of cell division	0.0034	1	dependent GO term
myeloid leukocyte mediated immunity	0.0034	0.5	dependent GO term
maintenance of DNA repeat elements	0.00341	0.333333	dependent GO term
negative regulation of cellular component organization	0.00341	0.333333	dependent GO term
regulation of RNA metabolic process	0.00349	0.5	dependent GO term
cell growth	0.0035	0.333333	dependent GO term
anatomical structure formation involved in morphogenesis	0.00352	0.75	dependent GO term
erythrocyte homeostasis	0.00353	0.5	dependent GO term
regulation of purine nucleotide metabolic process	0.00353	1	dependent GO term
mesenchymal cell proliferation	0.00353	0.333333	dependent GO term
positive regulation of JNK cascade	0.00353	0.5	dependent GO term
regulation of kidney development	0.00353	0.5	dependent GO term
acid secretion	0.00353	0.5	dependent GO term
exocrine system development	0.00353	1	dependent GO term
regulation of glial cell differentiation	0.00353	0.5	dependent GO term
acid secretion	0.00353	0.5	dependent GO term
negative regulation of cellular macromolecule biosynthetic process	0.00359	0.333333	dependent GO term
positive regulation of lyase activity	0.00359	1	dependent GO term
glutamate secretion	0.00359	0.666667	dependent GO term
protein-lipid complex subunit organization	0.00359	0.666667	dependent GO term
nuclear-transcribed mRNA catabolic process, nonsense-mediated decay	0.00359	0	dependent GO term
negative regulation of gene expression	0.00363	0.333333	dependent GO term
interleukin-17 production	0.00365	0.8	independent GO term
positive regulation of interferon-beta production	0.00365	0.8	dependent GO term
cellular response to nitrogen compound	0.00366	0.75	dependent GO term
embryonic heart tube morphogenesis	0.00368	0.333333	dependent GO term
head development	0.00368	0.333333	dependent GO term
regulation of skeletal muscle fiber development	0.00368	0.666667	dependent GO term
response to nicotine	0.00368	0.5	dependent GO term
regulation of organic acid transport	0.00368	1	dependent GO term
embryonic heart tube morphogenesis	0.00368	0.5	dependent GO term
cardiac muscle tissue growth	0.00368	0.5	dependent GO term
regulation of cardiac muscle tissue development	0.00368	0.5	dependent GO term
positive regulation of leukocyte chemotaxis	0.00368	1	dependent GO term
positive regulation of T cell differentiation	0.00368	1	dependent GO term
positive regulation of leukocyte chemotaxis	0.00368	1	dependent GO term
regulation of organic acid transport	0.00368	0.5	dependent GO term
cellular modified amino acid biosynthetic process	0.00368	0	dependent GO term
establishment of protein localization to membrane	0.00368	0	dependent GO term
chemokine production	0.00368	0.5	independent GO term
cellular modified amino acid biosynthetic process	0.00368	1	dependent GO term
phospholipase C-activating G-protein coupled receptor signaling pathway	0.00368	1	dependent GO term
regulation of nucleotide metabolic process	0.00372	1	dependent GO term
cellular component assembly	0.00373	0	independent GO term
mRNA transcription from RNA polymerase II promoter	0.00374	0.5	dependent GO term
regulation of stress-activated MAPK cascade	0.00374	0.5	dependent GO term
negative regulation of apoptotic signaling pathway	0.00374	0.6	dependent GO term
cellular response to hormone stimulus	0.00375	0.75	dependent GO term
cellular localization	0.00377	0.555556	independent GO term
negative regulation of mRNA splicing, via spliceosome	0.00378	0	dependent GO term
regulation of translation in response to stress	0.00378	0.4	dependent GO term
positive regulation of interleukin-1 secretion	0.00378	1	dependent GO term
positive regulation of interleukin-1 beta secretion	0.00378	1	dependent GO term
positive regulation of mast cell activation	0.00378	0.4	dependent GO term
serotonin secretion	0.00378	0.4	dependent GO term
regulation of neuron projection development	0.0038	0.875	dependent GO term
smoothened signaling pathway	0.0038	0.285714	dependent GO term
cell surface receptor signaling pathway	0.00381	0.642857	independent GO term
phosphate-containing compound metabolic process	0.00382	0.642857	dependent GO term
regulation of stress-activated protein kinase signaling cascade	0.00382	0.5	dependent GO term
embryonic pattern specification	0.00382	0.333333	dependent GO term
positive regulation of hydrolase activity	0.00382	1	dependent GO term
muscle cell migration	0.00382	1	dependent GO term
glomerulus development	0.00382	0.5	dependent GO term
cellular response to inorganic substance	0.00384	0.666667	dependent GO term
B cell receptor signaling pathway	0.00385	0.8	dependent GO term
regulation of Rac protein signal transduction	0.00385	0.666667	dependent GO term
localization of cell	0.00387	0.75	independent GO term
cell motility	0.00387	0.75	dependent GO term
triglyceride metabolic process	0.00388	0.875	dependent GO term
transmembrane receptor protein tyrosine kinase signaling pathway	0.00388	0.75	dependent GO term
positive regulation of transferase activity	0.0039	0.642857	dependent GO term
RNA biosynthetic process	0.0039	0.333333	dependent GO term
RNA biosynthetic process	0.0039	0.4	dependent GO term
RNA metabolic process	0.00393	0.3	dependent GO term
actin polymerization or depolymerization	0.00395	0.4	dependent GO term
purine ribonucleotide biosynthetic process	0.00396	0.75	dependent GO term
positive regulation of transport	0.00397	1	dependent GO term
cardiac muscle tissue morphogenesis	0.00397	0.333333	dependent GO term
histone lysine methylation	0.00397	0.333333	dependent GO term
catecholamine transport	0.00397	0.5	dependent GO term
toll-like receptor signaling pathway	0.00397	0.5	dependent GO term
lymphocyte homeostasis	0.00397	0.5	dependent GO term
bone resorption	0.00397	1	dependent GO term
lymphocyte homeostasis	0.00397	1	dependent GO term
ethanolamine-containing compound metabolic process	0.00397	0	dependent GO term
myeloid cell activation involved in immune response	0.00397	0.5	dependent GO term
cardiac muscle tissue morphogenesis	0.00397	1	dependent GO term
regulation of cell cycle process	0.00398	0.666667	dependent GO term
axonogenesis	0.00398	0.333333	dependent GO term
JNK cascade	0.00399	0.5	dependent GO term
enzyme linked receptor protein signaling pathway	0.004	0.6	dependent GO term
negative regulation of immune effector process	0.00406	0.5	dependent GO term
positive regulation of interleukin-10 production	0.00408	0.8	dependent GO term
negative regulation of blood vessel endothelial cell migration	0.00408	0.75	dependent GO term
positive regulation of multicellular organismal process	0.00411	0.4	dependent GO term
positive regulation of cellular component organization	0.00411	0.2	dependent GO term
ribonucleoside triphosphate catabolic process	0.00412	0.25	dependent GO term
purine ribonucleoside triphosphate catabolic process	0.00412	0.25	dependent GO term
outflow tract morphogenesis	0.00412	0.333333	dependent GO term
protein targeting to membrane	0.00412	0	dependent GO term
positive regulation of carbohydrate metabolic process	0.00412	1	dependent GO term
outflow tract morphogenesis	0.00412	0.5	dependent GO term
response to xenobiotic stimulus	0.00412	0	independent GO term
positive regulation of endothelial cell proliferation	0.00412	1	dependent GO term
fibroblast growth factor receptor signaling pathway	0.00412	0	dependent GO term
nucleic acid phosphodiester bond hydrolysis	0.00412	0	dependent GO term
vitamin metabolic process	0.00412	1	dependent GO term
protein K63-linked ubiquitination	0.00413	0.25	dependent GO term
positive regulation of viral process	0.00413	0.333333	dependent GO term
regulation of bone resorption	0.00413	0.333333	dependent GO term
tyrosine phosphorylation of Stat3 protein	0.00413	0	dependent GO term
regulation of bone resorption	0.00413	0.666667	dependent GO term
B cell activation involved in immune response	0.00414	0.333333	dependent GO term
lipoprotein catabolic process	0.00414	0.875	dependent GO term
regulation of axonogenesis	0.00417	0.666667	dependent GO term
RNA interference	0.00419	0.3	dependent GO term
purine nucleoside triphosphate catabolic process	0.00419	0.25	dependent GO term
nucleobase-containing compound metabolic process	0.0042	0.363636	dependent GO term
cellular response to growth factor stimulus	0.00426	0.666667	dependent GO term
actin cytoskeleton reorganization	0.00427	0.333333	dependent GO term
embryonic digit morphogenesis	0.00427	0.333333	dependent GO term
embryonic digit morphogenesis	0.00427	0	dependent GO term
embryonic digit morphogenesis	0.00427	0.5	dependent GO term
negative regulation of NF-kappaB transcription factor activity	0.00427	0.5	dependent GO term
regulation of morphogenesis of a branching structure	0.00427	1	dependent GO term
nitrogen compound metabolic process	0.00428	0.333333	independent GO term
negative regulation of nucleobase-containing compound metabolic process	0.00432	0.333333	dependent GO term
cytokine biosynthetic process	0.00435	0.428571	dependent GO term
nucleoside triphosphate catabolic process	0.00436	0.25	dependent GO term
positive regulation of cellular process	0.00437	0.285714	dependent GO term
purine nucleotide biosynthetic process	0.00437	0.75	dependent GO term
negative regulation of mRNA processing	0.00441	0	dependent GO term
epithelial cell differentiation involved in prostate gland development	0.00441	0.8	dependent GO term
negative regulation of B cell proliferation	0.00441	0.8	dependent GO term
ncRNA catabolic process	0.00441	0.2	dependent GO term
sister chromatid cohesion	0.00441	0	dependent GO term
modification by host of symbiont morphology or physiology	0.00441	0.666667	dependent GO term
NAD metabolic process	0.00441	0	dependent GO term
regulation of polysaccharide biosynthetic process	0.00441	0.666667	dependent GO term
regulation of glycogen metabolic process	0.00441	0.666667	dependent GO term
sodium ion homeostasis	0.00441	0.666667	dependent GO term
positive regulation of MAP kinase activity	0.00442	0.5	dependent GO term
cardiac muscle tissue development	0.00442	0.4	dependent GO term
immune response-activating signal transduction	0.00442	0.4	dependent GO term
cardiac muscle tissue development	0.00442	0.6	dependent GO term
maternal process involved in female pregnancy	0.00442	0.25	independent GO term
forebrain generation of neurons	0.00442	0.333333	dependent GO term
regulation of hemostasis	0.00442	1	dependent GO term
regulation of blood coagulation	0.00442	1	dependent GO term
DNA damage response, signal transduction by p53 class mediator	0.00442	0.5	dependent GO term
regulation of response to biotic stimulus	0.00442	1	dependent GO term
platelet activation	0.00442	1	dependent GO term
platelet activation	0.00442	1	dependent GO term
protein deacetylation	0.00442	1	dependent GO term
blood vessel endothelial cell migration	0.00442	1	dependent GO term
negative regulation of immune response	0.00442	0.5	dependent GO term
tRNA processing	0.00442	0	dependent GO term
RNA biosynthetic process	0.00443	0.5	dependent GO term
negative regulation of cell differentiation	0.00443	0.5	dependent GO term
positive regulation of protein modification process	0.00443	0.2	dependent GO term
purine nucleoside catabolic process	0.00443	0.25	dependent GO term
purine ribonucleoside catabolic process	0.00443	0.25	dependent GO term
peptidyl-tyrosine phosphorylation	0.00443	0.75	dependent GO term
positive regulation of leukocyte activation	0.00453	0.363636	dependent GO term
positive regulation of NF-kappaB import into nucleus	0.00453	0.8	dependent GO term
positive regulation of interleukin-8 production	0.00453	0.8	dependent GO term
regulation of neutrophil chemotaxis	0.00453	0.75	dependent GO term
positive regulation of interleukin-8 production	0.00453	0.5	dependent GO term
positive regulation of NF-kappaB import into nucleus	0.00453	0.5	dependent GO term
phosphorus metabolic process	0.00455	0.642857	independent GO term
peptidyl-tyrosine modification	0.00455	0.75	dependent GO term
regulation of fibrinolysis	0.00457	0.833333	independent GO term
cellular response to thyroid hormone stimulus	0.00457	0.5	dependent GO term
platelet-derived growth factor receptor signaling pathway	0.00458	0.642857	dependent GO term
generation of precursor metabolites and energy	0.00458	0.545455	independent GO term
intracellular protein transport	0.00458	0.555556	dependent GO term
chemotaxis	0.00458	0.333333	dependent GO term
glutamate receptor signaling pathway	0.00458	0.5	dependent GO term
heart growth	0.00458	0.5	dependent GO term
leukocyte mediated cytotoxicity	0.00458	1	dependent GO term
positive regulation of lymphocyte mediated immunity	0.00458	1	dependent GO term
ceramide metabolic process	0.00458	0	dependent GO term
fatty acid beta-oxidation	0.00458	0.5	dependent GO term
negative regulation of macromolecule biosynthetic process	0.00459	0.333333	dependent GO term
ribonucleoside catabolic process	0.00462	0.25	dependent GO term
response to peptide	0.00462	0.75	dependent GO term
taxis	0.00462	0.333333	dependent GO term
regulation of hormone levels	0.00465	0.666667	independent GO term
protein modification by small protein conjugation	0.00467	0	dependent GO term
ribonucleotide biosynthetic process	0.00468	0.75	dependent GO term
nucleoside catabolic process	0.00469	0.25	dependent GO term
positive regulation of gene expression	0.0047	0.5	dependent GO term
response to abiotic stimulus	0.00471	0.75	independent GO term
microtubule anchoring	0.00471	0.333333	dependent GO term
response to pain	0.00471	0.333333	dependent GO term
regulation of DNA-dependent DNA replication initiation	0.00474	0.142857	dependent GO term
negative regulation of nitrogen compound metabolic process	0.00474	0.333333	dependent GO term
cardiac septum development	0.00474	0.333333	dependent GO term
mammary gland morphogenesis	0.00474	0.333333	dependent GO term
myoblast differentiation	0.00474	0.666667	dependent GO term
cardiac septum development	0.00474	0.5	dependent GO term
positive regulation of leukocyte mediated immunity	0.00474	1	dependent GO term
negative regulation of neuron differentiation	0.00474	0.5	dependent GO term
positive regulation of cytokine secretion	0.00474	0.5	dependent GO term
cardiac chamber development	0.00475	0.5	dependent GO term
purine-containing compound biosynthetic process	0.00481	0.75	dependent GO term
ribose phosphate biosynthetic process	0.00487	0.75	dependent GO term
positive regulation of immune system process	0.00489	0.5	dependent GO term
muscle tissue morphogenesis	0.00491	0.333333	dependent GO term
dicarboxylic acid transport	0.00491	1	dependent GO term
organ formation	0.00491	0.5	dependent GO term
positive regulation of adaptive immune response based on somatic recombination of immune receptors built from immunoglobulin superfamily domains	0.00491	1	dependent GO term
thioester metabolic process	0.00491	0.5	independent GO term
acyl-CoA metabolic process	0.00491	0.5	dependent GO term
thioester metabolic process	0.00491	0	independent GO term
acyl-CoA metabolic process	0.00491	0	dependent GO term
protein deacylation	0.00491	1	dependent GO term
protein lipidation	0.00491	0	dependent GO term
muscle tissue morphogenesis	0.00491	1	dependent GO term
glycosyl compound catabolic process	0.00492	0.25	dependent GO term
cytokine metabolic process	0.00495	0.428571	independent GO term
regulation of response to stimulus	0.00496	0.642857	independent GO term
purine ribonucleotide catabolic process	0.00496	0.25	dependent GO term
monocarboxylic acid metabolic process	0.00496	1	dependent GO term
transmembrane receptor protein tyrosine kinase signaling pathway	0.00497	0.857143	dependent GO term
ribonucleotide catabolic process	0.005	0.25	dependent GO term
positive regulation of type I interferon production	0.00501	0.8	dependent GO term
positive regulation of cytokine production involved in immune response	0.00501	0.8	dependent GO term
positive regulation of vasoconstriction	0.00501	1	dependent GO term
ovulation	0.00501	0.75	independent GO term
positive regulation of blood vessel endothelial cell migration	0.00501	0.75	dependent GO term
regulation of pathway-restricted SMAD protein phosphorylation	0.00501	0.666667	dependent GO term
regulation of pathway-restricted SMAD protein phosphorylation	0.00501	0.666667	dependent GO term
positive regulation of epithelial cell differentiation	0.00501	0.333333	dependent GO term
regulation of pathway-restricted SMAD protein phosphorylation	0.00501	0.666667	dependent GO term
regulation of calcium ion-dependent exocytosis	0.00501	0	dependent GO term
GPI anchor biosynthetic process	0.00501	0.333333	dependent GO term
positive regulation of stem cell proliferation	0.00507	0.333333	dependent GO term
regulation of coagulation	0.00507	1	dependent GO term
protein deubiquitination	0.00507	0	dependent GO term
positive regulation of stress-activated MAPK cascade	0.00507	0.5	dependent GO term
positive regulation of lymphocyte differentiation	0.00507	1	dependent GO term
regulation of response to external stimulus	0.00508	0.333333	dependent GO term
regulation of interleukin-1 beta secretion	0.00509	1	dependent GO term
cardiac right ventricle morphogenesis	0.00509	0.6	dependent GO term
nuclear division	0.00514	0	dependent GO term
mitosis	0.00514	0	dependent GO term
regulation of cellular macromolecule biosynthetic process	0.00516	0.333333	dependent GO term
regulation of cellular macromolecule biosynthetic process	0.00516	0.4	dependent GO term
DNA packaging	0.00516	0	dependent GO term
transmembrane receptor protein serine/threonine kinase signaling pathway	0.00521	0.5	dependent GO term
positive regulation of stress-activated protein kinase signaling cascade	0.00524	0.5	dependent GO term
branching involved in ureteric bud morphogenesis	0.00524	0.5	dependent GO term
positive regulation of adaptive immune response	0.00524	1	dependent GO term
positive regulation of epithelial cell migration	0.00524	1	dependent GO term
cardiac ventricle morphogenesis	0.00524	1	dependent GO term
chromosome organization involved in meiosis	0.00533	0	dependent GO term
activin receptor signaling pathway	0.00533	0.666667	dependent GO term
negative regulation of ossification	0.00533	0.666667	dependent GO term
negative regulation of osteoblast differentiation	0.00533	0.666667	dependent GO term
activin receptor signaling pathway	0.00533	0.333333	dependent GO term
synaptic transmission, glutamatergic	0.00541	0.5	dependent GO term
synaptic transmission, glutamatergic	0.00541	1	dependent GO term
meiosis I	0.00541	0	dependent GO term
regulation of RNA splicing	0.00541	0	dependent GO term
kidney epithelium development	0.00541	0.5	dependent GO term
regulation of leukocyte chemotaxis	0.00541	1	dependent GO term
regulation of leukocyte chemotaxis	0.00541	1	dependent GO term
regulation of RNA splicing	0.00541	0	dependent GO term
phosphatidylinositol biosynthetic process	0.00541	0	dependent GO term
synaptic transmission, glutamatergic	0.00541	0	dependent GO term
actin cytoskeleton organization	0.00548	0.666667	dependent GO term
positive regulation of cell activation	0.00549	0.363636	dependent GO term
regulation of cellular macromolecule biosynthetic process	0.0055	0.5	dependent GO term
positive regulation of interleukin-12 production	0.00551	0.8	dependent GO term
glomerulus vasculature development	0.00551	0.75	dependent GO term
ionotropic glutamate receptor signaling pathway	0.00551	0.25	dependent GO term
positive regulation of cellular process	0.00556	0.642857	dependent GO term
regulation of cell proliferation	0.00559	0.5	independent GO term
somitogenesis	0.00559	0.333333	dependent GO term
mesoderm formation	0.00559	0	dependent GO term
regulation of cyclin-dependent protein serine/threonine kinase activity	0.00559	0.5	dependent GO term
sensory perception of taste	0.00559	1	independent GO term
fatty acid transport	0.00559	0.5	dependent GO term
fatty acid transport	0.00559	0.5	dependent GO term
salivary gland morphogenesis	0.00565	0.333333	dependent GO term
salivary gland morphogenesis	0.00565	0.333333	dependent GO term
regulation of polysaccharide metabolic process	0.00565	0.666667	dependent GO term
regulation of protein processing	0.00565	0.333333	dependent GO term
positive regulation of intrinsic apoptotic signaling pathway	0.00565	0.666667	dependent GO term
cholesterol biosynthetic process	0.00565	0.666667	dependent GO term
meiotic mismatch repair	0.00569	0.333333	dependent GO term
regulation of neuron differentiation	0.00573	0.333333	dependent GO term
acylglycerol metabolic process	0.00575	0.875	dependent GO term
negative regulation of cellular biosynthetic process	0.00576	0.333333	dependent GO term
steroid metabolic process	0.00577	0.5	dependent GO term
vasodilation	0.00577	0.5	dependent GO term
negative regulation of multi-organism process	0.00577	1	dependent GO term
cellular response to hydrogen peroxide	0.00577	1	dependent GO term
lipoprotein biosynthetic process	0.00577	0	dependent GO term
regulation of anatomical structure morphogenesis	0.00578	0.4	dependent GO term
cell-type specific apoptotic process	0.00578	0	dependent GO term
atrial septum development	0.00581	0.6	dependent GO term
cellular component biogenesis	0.00582	0	independent GO term
cellular process involved in reproduction	0.00582	0.25	independent GO term
regulation of lymphocyte activation	0.00584	0.5	dependent GO term
heterocycle metabolic process	0.00585	0.363636	independent GO term
neutrophil degranulation	0.00586	0.2	dependent GO term
purine nucleotide catabolic process	0.00586	0.25	dependent GO term
positive regulation of macromolecule biosynthetic process	0.00587	0.5	dependent GO term
immune response-regulating signaling pathway	0.00588	0.4	dependent GO term
protein ubiquitination	0.00591	0.25	dependent GO term
protein oligomerization	0.00591	0.333333	dependent GO term
protein oligomerization	0.00591	0.333333	dependent GO term
positive regulation of catalytic activity	0.00594	0.875	dependent GO term
myeloid cell homeostasis	0.00594	0.5	dependent GO term
embryonic heart tube development	0.00595	0.333333	dependent GO term
pattern recognition receptor signaling pathway	0.00595	0.5	dependent GO term
positive regulation of T cell proliferation	0.00595	1	dependent GO term
ureteric bud morphogenesis	0.00595	0.5	dependent GO term
embryonic heart tube development	0.00595	0.5	dependent GO term
positive regulation of T cell proliferation	0.00595	1	dependent GO term
positive regulation of calcium ion transport	0.00595	1	dependent GO term
blastocyst development	0.00595	0	dependent GO term
protein trimerization	0.00598	0	dependent GO term
GPI anchor metabolic process	0.00598	0.333333	dependent GO term
positive regulation of nucleobase-containing compound metabolic process	0.00599	0.5	dependent GO term
regulation of activin receptor signaling pathway	0.00603	0.5	dependent GO term
renal system vasculature development	0.00603	0.75	dependent GO term
kidney vasculature development	0.00603	0.75	dependent GO term
cerebral cortex radially oriented cell migration	0.00603	0.25	dependent GO term
positive regulation of axon extension	0.00603	0.25	dependent GO term
startle response	0.00603	0.25	dependent GO term
oxidation-reduction process	0.00612	0.833333	independent GO term
regulation of anion transport	0.00613	1	dependent GO term
mesoderm morphogenesis	0.00613	0	dependent GO term
regulation of anion transport	0.00613	0.5	dependent GO term
negative regulation of DNA metabolic process	0.00613	0	dependent GO term
negative regulation of DNA metabolic process	0.00613	0	dependent GO term
glycolipid metabolic process	0.00613	0	dependent GO term
cardiac muscle contraction	0.00613	1	dependent GO term
muscle system process	0.00615	0.75	independent GO term
purine-containing compound catabolic process	0.00617	0.25	dependent GO term
neutral lipid metabolic process	0.00619	0.875	independent GO term
chromosome organization	0.0062	0	dependent GO term
cellular aromatic compound metabolic process	0.00621	0.363636	independent GO term
stress-activated MAPK cascade	0.00621	0.5	dependent GO term
purine ribonucleoside triphosphate metabolic process	0.00622	0.25	dependent GO term
blood coagulation	0.00623	0.833333	dependent GO term
cellular biosynthetic process	0.00628	0.363636	dependent GO term
regulation of molecular function	0.00631	0.642857	independent GO term
muscle organ morphogenesis	0.00631	0.333333	dependent GO term
histone methylation	0.00631	0.333333	dependent GO term
hippocampus development	0.00631	0.5	dependent GO term
monoamine transport	0.00631	0.5	dependent GO term
negative regulation of cellular response to growth factor stimulus	0.00631	0	dependent GO term
sulfur compound biosynthetic process	0.00631	1	dependent GO term
muscle organ morphogenesis	0.00631	1	dependent GO term
interaction with symbiont	0.00632	0.666667	independent GO term
regulation of mRNA stability	0.00632	0	dependent GO term
regulation of bone remodeling	0.00632	0.333333	dependent GO term
hematopoietic progenitor cell differentiation	0.00632	0.666667	dependent GO term
pathway-restricted SMAD protein phosphorylation	0.00632	0.666667	dependent GO term
regulation of endocrine process	0.00632	0.666667	dependent GO term
pathway-restricted SMAD protein phosphorylation	0.00632	0.666667	dependent GO term
regulation of bone remodeling	0.00632	0.666667	dependent GO term
pathway-restricted SMAD protein phosphorylation	0.00632	0.666667	dependent GO term
negative regulation of BMP signaling pathway	0.00632	0.666667	dependent GO term
leukocyte cell-cell adhesion	0.00632	0.666667	dependent GO term
cholesterol efflux	0.00632	0.666667	dependent GO term
negative regulation of biosynthetic process	0.00637	0.333333	dependent GO term
positive regulation of peptidyl-tyrosine phosphorylation	0.00638	0.5	dependent GO term
protein phosphorylation	0.00639	0.25	dependent GO term
regulation of macromolecule biosynthetic process	0.00641	0.333333	dependent GO term
regulation of macromolecule biosynthetic process	0.00641	0.4	dependent GO term
purine nucleoside triphosphate metabolic process	0.00645	0.25	dependent GO term
nucleotide catabolic process	0.00645	0.25	dependent GO term
thyroid hormone generation	0.00648	0.5	dependent GO term
regulation of macromolecule biosynthetic process	0.0065	0.5	dependent GO term
regulation of fat cell differentiation	0.0065	0.333333	dependent GO term
innate immune response-activating signal transduction	0.0065	0.5	dependent GO term
signal transduction in response to DNA damage	0.0065	0.5	dependent GO term
regulation of carbohydrate biosynthetic process	0.0065	1	dependent GO term
modification of morphology or physiology of other organism involved in symbiotic interaction	0.0065	1	dependent GO term
regulation of viral process	0.0065	1	dependent GO term
oligodendrocyte differentiation	0.0065	0.5	dependent GO term
regulation of gliogenesis	0.0065	0.5	dependent GO term
regulation of fat cell differentiation	0.0065	0.5	dependent GO term
regulation of stem cell differentiation	0.0065	0	dependent GO term
hemostasis	0.00653	0.833333	independent GO term
ribonucleoside triphosphate metabolic process	0.00654	0.25	dependent GO term
cellular modified amino acid metabolic process	0.00655	0.2	dependent GO term
regulation of interleukin-1 secretion	0.00659	1	dependent GO term
forebrain neuron development	0.00659	0.4	dependent GO term
regulation of homotypic cell-cell adhesion	0.00659	0.8	dependent GO term
SMAD protein signal transduction	0.00659	0.6	independent GO term
regulation of metabolic process	0.00661	0.642857	independent GO term
positive regulation of nitrogen compound metabolic process	0.00665	0.5	dependent GO term
stress-activated protein kinase signaling cascade	0.00666	0.5	dependent GO term
sulfur compound metabolic process	0.00666	0.2	independent GO term
potassium ion transmembrane transport	0.00667	0.25	dependent GO term
coagulation	0.00668	0.833333	independent GO term
leukocyte homeostasis	0.00669	0.5	dependent GO term
regulation of organ growth	0.00669	0.5	dependent GO term
leukocyte homeostasis	0.00669	1	dependent GO term
regulation of lipid transport	0.00669	0.5	dependent GO term
cell morphogenesis involved in neuron differentiation	0.00673	0.333333	dependent GO term
nucleoside phosphate catabolic process	0.00678	0.25	dependent GO term
positive regulation of protein phosphorylation	0.00681	0.5	dependent GO term
ion transmembrane transport	0.00682	0.333333	dependent GO term
bone morphogenesis	0.00689	0	dependent GO term
positive regulation of synaptic transmission	0.00689	0.5	dependent GO term
regulation of amine transport	0.00689	1	dependent GO term
bone morphogenesis	0.00689	0	dependent GO term
bone morphogenesis	0.00689	1	dependent GO term
regulation of endothelial cell migration	0.00689	1	dependent GO term
activation of protein kinase activity	0.0069	0.5	dependent GO term
response to inorganic substance	0.00692	0.666667	independent GO term
organophosphate biosynthetic process	0.00697	1	dependent GO term
microtubule-based process	0.00697	0.333333	independent GO term
sodium ion transport	0.00699	0.666667	dependent GO term
protein complex subunit organization	0.007	0	dependent GO term
cellular potassium ion transport	0.00703	0.25	dependent GO term
positive regulation of multi-organism process	0.00703	0.333333	dependent GO term
neuroepithelial cell differentiation	0.00703	0.666667	dependent GO term
regulation of cardiac muscle tissue growth	0.00703	0.333333	dependent GO term
positive regulation of tyrosine phosphorylation of STAT protein	0.00703	0	dependent GO term
synaptic vesicle exocytosis	0.00703	0.333333	dependent GO term
glucan biosynthetic process	0.00703	0.666667	dependent GO term
glycogen biosynthetic process	0.00703	0.666667	dependent GO term
striated muscle hypertrophy	0.00703	0.666667	dependent GO term
cardiac muscle hypertrophy	0.00703	0.666667	dependent GO term
regulation of systemic arterial blood pressure by hormone	0.00703	0.666667	dependent GO term
axis specification	0.00708	0.333333	dependent GO term
response to ammonium ion	0.00708	0.5	dependent GO term
tumor necrosis factor production	0.00708	0.5	dependent GO term
regulation of tumor necrosis factor production	0.00708	0.5	dependent GO term
tumor necrosis factor production	0.00708	1	dependent GO term
regulation of tumor necrosis factor production	0.00708	1	dependent GO term
regulation of interferon-gamma production	0.00708	0.5	dependent GO term
positive regulation of dendrite development	0.0071	0.875	dependent GO term
dephosphorylation	0.00711	0.666667	dependent GO term
regulation of cellular response to growth factor stimulus	0.00715	0.333333	dependent GO term
leukotriene metabolic process	0.00715	0.8	dependent GO term
spindle localization	0.00715	0	dependent GO term
organelle transport along microtubule	0.00715	0.25	dependent GO term
negative regulation of cyclic nucleotide biosynthetic process	0.00715	0.75	dependent GO term
negative regulation of cAMP biosynthetic process	0.00715	0.75	dependent GO term
organic substance biosynthetic process	0.00722	0.363636	dependent GO term
nucleoside triphosphate metabolic process	0.00726	0.25	dependent GO term
regulation of MAPK cascade	0.00726	0.25	dependent GO term
regulation of MAPK cascade	0.00726	0.333333	dependent GO term
negative regulation of cell differentiation	0.00726	0.333333	dependent GO term
pattern specification process	0.00726	0.666667	dependent GO term
organelle fission	0.00728	0	dependent GO term
mammary gland epithelium development	0.00728	0.333333	dependent GO term
palate development	0.00728	0.333333	dependent GO term
palate development	0.00728	0	dependent GO term
cell recognition	0.00728	0	independent GO term
positive regulation of homeostatic process	0.00728	0	dependent GO term
regulation of fibroblast proliferation	0.00728	1	dependent GO term
positive regulation of inflammatory response	0.00728	0.5	dependent GO term
actin filament-based process	0.00737	0.666667	independent GO term
androgen receptor signaling pathway	0.0074	0.333333	dependent GO term
aerobic respiration	0.0074	0	dependent GO term
endocrine hormone secretion	0.0074	0.666667	dependent GO term
regulation of epithelial to mesenchymal transition	0.0074	0.666667	dependent GO term
aerobic respiration	0.0074	1	dependent GO term
regulation of catecholamine secretion	0.0074	0.666667	dependent GO term
sterol biosynthetic process	0.0074	0.666667	dependent GO term
mitochondrial outer membrane permeabilization	0.00741	0.333333	dependent GO term
interleukin-1 beta secretion	0.00741	1	dependent GO term
positive regulation of interleukin-1 beta production	0.00741	1	dependent GO term
negative regulation of striated muscle tissue development	0.00741	0.4	dependent GO term
regulation of B cell apoptotic process	0.00741	0.8	dependent GO term
regulation of mast cell degranulation	0.00741	0.4	dependent GO term
regulation of histone H3-K4 methylation	0.00741	0.2	dependent GO term
locomotion	0.00744	0.75	independent GO term
cell cycle	0.00747	0	independent GO term
regulation of skeletal muscle tissue development	0.00749	0.666667	dependent GO term
protein modification by small protein removal	0.00749	0	dependent GO term
tumor necrosis factor superfamily cytokine production	0.00749	0.5	independent GO term
positive regulation of leukocyte migration	0.00749	1	dependent GO term
tumor necrosis factor superfamily cytokine production	0.00749	1	independent GO term
positive regulation of leukocyte migration	0.00749	1	dependent GO term
membrane lipid biosynthetic process	0.00749	0	dependent GO term
membrane lipid biosynthetic process	0.00749	0	dependent GO term
establishment of synaptic vesicle localization	0.00752	0.555556	dependent GO term
synaptic vesicle transport	0.00752	0.555556	dependent GO term
mRNA transcription	0.00755	0.5	dependent GO term
apoptotic signaling pathway	0.00757	0.75	independent GO term
protein modification by small protein conjugation	0.00757	0.25	dependent GO term
response to bacterium	0.00757	0.666667	dependent GO term
protein modification by small protein conjugation	0.00757	0	dependent GO term
cerebral cortex development	0.00762	0.875	dependent GO term
negative regulation of mitotic cell cycle phase transition	0.00762	0	dependent GO term
purine-containing compound metabolic process	0.00765	0.2	dependent GO term
epithelial to mesenchymal transition	0.00769	0.333333	dependent GO term
positive regulation of transmission of nerve impulse	0.00769	0.5	dependent GO term
activation of innate immune response	0.00769	0.5	dependent GO term
amine transport	0.00769	1	dependent GO term
integrin-mediated signaling pathway	0.00769	0.5	dependent GO term
protein localization to plasma membrane	0.00769	0.5	dependent GO term
integrin-mediated signaling pathway	0.00769	0	dependent GO term
negative regulation of extrinsic apoptotic signaling pathway	0.00769	0	dependent GO term
alpha-amino acid biosynthetic process	0.00769	0	dependent GO term
fatty acid catabolic process	0.00769	0.5	dependent GO term
epithelial to mesenchymal transition	0.00769	1	dependent GO term
fibroblast proliferation	0.00769	1	dependent GO term
protein localization to plasma membrane	0.00769	0	dependent GO term
histone H4 deacetylation	0.00771	0.333333	dependent GO term
cellular response to organic cyclic compound	0.00771	0.5	dependent GO term
regulation of interferon-beta production	0.00775	0.8	dependent GO term
B cell homeostasis	0.00775	0.25	dependent GO term
positive regulation of heart contraction	0.00775	0.5	dependent GO term
regulation of endothelial cell apoptotic process	0.00775	0.75	dependent GO term
regulation of cardiac muscle hypertrophy	0.00775	0.75	dependent GO term
regulation of cellular protein metabolic process	0.00776	0.642857	dependent GO term
temperature homeostasis	0.00778	0.25	independent GO term
antigen processing and presentation of peptide antigen	0.00778	1	dependent GO term
platelet-derived growth factor receptor signaling pathway	0.00778	0.666667	dependent GO term
regulation of cyclase activity	0.00778	1	dependent GO term
lamellipodium assembly	0.00778	0.666667	dependent GO term
salivary gland development	0.00778	0.333333	dependent GO term
regulation of RNA stability	0.00778	0	dependent GO term
Rac protein signal transduction	0.00778	0.666667	dependent GO term
[truncated: 2,360 more rows]

## Sheet: new
GO terms	Significance p-value	diseae enrichment ratio	GO term type
nucleobase-containing compound biosynthetic process	3.25e-15	0.393939	dependent GO term
aromatic compound biosynthetic process	5.66e-15	0.393939	dependent GO term
heterocycle biosynthetic process	5.76e-15	0.393939	dependent GO term
cellular nitrogen compound biosynthetic process	9.09e-15	0.393939	dependent GO term
RNA biosynthetic process	1.25e-14	0.393939	dependent GO term
organic cyclic compound biosynthetic process	1.35e-14	0.393939	dependent GO term
RNA metabolic process	2.48e-14	0.393939	dependent GO term
transcription from RNA polymerase II promoter	7.33e-14	0.393939	dependent GO term
regulation of transcription from RNA polymerase II promoter	9.98e-13	0.393939	dependent GO term
nucleic acid metabolic process	1.27e-12	0.393939	dependent GO term
nucleobase-containing compound metabolic process	2.31e-12	0.393939	dependent GO term
regulation of RNA biosynthetic process	3.6e-12	0.393939	dependent GO term
heterocycle metabolic process	5.35e-12	0.393939	dependent GO term
cellular aromatic compound metabolic process	6.24e-12	0.393939	dependent GO term
regulation of RNA metabolic process	6.48e-12	0.393939	dependent GO term
gene expression	9.19e-12	0.393939	dependent GO term
cellular nitrogen compound metabolic process	1.14e-11	0.393939	dependent GO term
organic cyclic compound metabolic process	1.61e-11	0.393939	dependent GO term
regulation of cellular macromolecule biosynthetic process	3.02e-11	0.393939	dependent GO term
regulation of macromolecule biosynthetic process	5.34e-11	0.393939	dependent GO term
nitrogen compound metabolic process	6.15e-11	0.393939	dependent GO term
cellular macromolecule biosynthetic process	6.98e-11	0.393939	dependent GO term
macromolecule biosynthetic process	1.2e-10	0.393939	dependent GO term
regulation of cellular biosynthetic process	1.47e-10	0.393939	dependent GO term
regulation of biosynthetic process	1.98e-10	0.393939	dependent GO term
regulation of nucleobase-containing compound metabolic process	1.99e-10	0.393939	dependent GO term
regulation of gene expression	2.18e-10	0.393939	dependent GO term
cellular biosynthetic process	2.65e-10	0.393939	dependent GO term
regulation of nitrogen compound metabolic process	2.74e-10	0.393939	dependent GO term
organic substance biosynthetic process	3.71e-10	0.393939	dependent GO term
Tie signaling pathway	5.3e-10	1	dependent GO term
biosynthetic process	5.49e-10	0.393939	dependent GO term
fibroblast growth factor receptor signaling pathway	1.2e-09	0.5	dependent GO term
epidermal growth factor receptor signaling pathway	1.55e-09	0.428571	dependent GO term
translational initiation	1.58e-09	0.166667	dependent GO term
positive regulation of RNA metabolic process	1.71e-09	0.393939	dependent GO term
hypusine metabolic process	2.12e-09	0	dependent GO term
peptidyl-lysine modification to hypusine	2.12e-09	0	dependent GO term
formation of translation preinitiation complex	2.21e-09	0.166667	dependent GO term
ERBB signaling pathway	2.97e-09	0.428571	dependent GO term
positive regulation of gene expression	5e-09	0.393939	dependent GO term
cellular response to fibroblast growth factor stimulus	7.27e-09	0.5	dependent GO term
positive regulation of macromolecule biosynthetic process	9.5e-09	0.393939	dependent GO term
positive regulation of nucleobase-containing compound metabolic process	1.01e-08	0.393939	dependent GO term
positive regulation of transcription from RNA polymerase II promoter	1.07e-08	0.393939	dependent GO term
positive regulation of nitrogen compound metabolic process	1.37e-08	0.393939	dependent GO term
transcription initiation from RNA polymerase II promoter	2.01e-08	0	dependent GO term
positive regulation of cellular biosynthetic process	2.73e-08	0.393939	dependent GO term
cellular response to sterol depletion	2.97e-08	0.666667	dependent GO term
SREBP signaling pathway	2.97e-08	0.666667	dependent GO term
DNA replication initiation	3.34e-08	0.125	dependent GO term
regulation of macromolecule metabolic process	3.38e-08	0.393939	dependent GO term
positive regulation of biosynthetic process	3.69e-08	0.393939	dependent GO term
parental behavior	4.45e-08	1	dependent GO term
maternal behavior	4.45e-08	1	dependent GO term
response to sterol depletion	4.45e-08	0.666667	dependent GO term
purinergic nucleotide receptor signaling pathway	4.45e-08	0.333333	dependent GO term
cellular response to interferon-alpha	4.45e-08	0	dependent GO term
ISG15-protein conjugation	5.32e-08	0.5	dependent GO term
tangential migration from the subventricular zone to the olfactory bulb	6.35e-08	0	dependent GO term
regulation of primary metabolic process	6.68e-08	0.393939	dependent GO term
protein K11-linked ubiquitination	8.11e-08	0.105263	dependent GO term
superoxide anion generation	8.58e-08	0.857143	dependent GO term
regulation of cellular metabolic process	8.86e-08	0.393939	dependent GO term
detection of molecule of bacterial origin	9.31e-08	0.75	dependent GO term
DNA replication	1.1e-07	0.125	dependent GO term
exocytosis	1.45e-07	0.2	dependent GO term
immune response-activating cell surface receptor signaling pathway	1.5e-07	0.625	dependent GO term
protein ubiquitination	1.83e-07	0.105263	dependent GO term
negative chemotaxis	2.41e-07	0	dependent GO term
cellular macromolecule metabolic process	2.44e-07	0.393939	dependent GO term
penile erection	2.97e-07	1	dependent GO term
response to interferon-alpha	2.97e-07	0	independent GO term
immune response-regulating cell surface receptor signaling pathway	3.05e-07	0.625	dependent GO term
postreplication repair	3.6e-07	0	dependent GO term
purinergic receptor signaling pathway	3.6e-07	0.333333	dependent GO term
protein modification by small protein conjugation	3.8e-07	0.105263	dependent GO term
calcium ion-dependent exocytosis	4.4e-07	0.2	dependent GO term
rhythmic process	4.61e-07	0.6	independent GO term
multicellular organismal reproductive behavior	5.13e-07	1	dependent GO term
DNA metabolic process	5.65e-07	0.6	dependent GO term
regulation of translational initiation	6.54e-07	0.166667	dependent GO term
leukocyte activation	6.93e-07	0.533333	dependent GO term
T cell activation	7.17e-07	0.533333	dependent GO term
DNA replication	9.37e-07	0.6	dependent GO term
response to ATP	9.38e-07	0.333333	dependent GO term
fibroblast growth factor receptor signaling pathway	1.05e-06	0.285714	dependent GO term
integrin-mediated signaling pathway	1.09e-06	0.4	dependent GO term
regulation of metabolic process	1.17e-06	0.393939	independent GO term
regulation of cell cycle	1.29e-06	0.571429	dependent GO term
superoxide metabolic process	1.31e-06	0.857143	dependent GO term
protein modification by small protein conjugation or removal	1.32e-06	0.105263	dependent GO term
circadian rhythm	1.35e-06	0.75	dependent GO term
copulation	1.38e-06	1	dependent GO term
negative regulation of chemotaxis	1.38e-06	0	dependent GO term
anaphase-promoting complex-dependent proteasomal ubiquitin-dependent protein catabolic process	1.49e-06	0.105263	dependent GO term
mismatch repair	1.49e-06	0	dependent GO term
cGMP biosynthetic process	1.55e-06	0	dependent GO term
ephrin receptor signaling pathway	1.55e-06	0	dependent GO term
regulation of extrinsic apoptotic signaling pathway via death domain receptors	1.73e-06	0.666667	dependent GO term
enzyme linked receptor protein signaling pathway	1.76e-06	0.428571	dependent GO term
positive regulation of RNA metabolic process	1.81e-06	0.6	dependent GO term
RNA processing	1.81e-06	0	dependent GO term
fibrinolysis	1.81e-06	0.6	dependent GO term
RNA biosynthetic process	1.88e-06	0.0833333	dependent GO term
endoplasmic reticulum unfolded protein response	1.94e-06	1	dependent GO term
cellular response to unfolded protein	2.15e-06	1	dependent GO term
cell activation	2.28e-06	0.533333	independent GO term
DNA unwinding involved in DNA replication	2.31e-06	0.125	dependent GO term
semaphorin-plexin signaling pathway	2.32e-06	0.2	dependent GO term
immune response-activating signal transduction	2.38e-06	0.625	dependent GO term
positive regulation of amine transport	2.38e-06	1	dependent GO term
transmembrane receptor protein tyrosine kinase signaling pathway	2.49e-06	0.428571	dependent GO term
vesicle organization	2.63e-06	0.2	dependent GO term
DNA recombination	2.69e-06	0	dependent GO term
DNA recombination	2.69e-06	0.25	dependent GO term
transcription initiation from mitochondrial promoter	2.77e-06	0.5	dependent GO term
negative regulation of T-helper 1 type immune response	2.77e-06	0.5	dependent GO term
positive regulation of telomere maintenance via telomerase	2.77e-06	0	dependent GO term
regulation of muscle filament sliding speed	2.77e-06	0.5	dependent GO term
GPI anchor biosynthetic process	2.89e-06	0	dependent GO term
positive regulation of macromolecule metabolic process	3.03e-06	0.393939	dependent GO term
detection of biotic stimulus	3.03e-06	0.75	dependent GO term
establishment of vesicle localization	3.12e-06	0.2	dependent GO term
neurotransmitter secretion	3.12e-06	0.2	dependent GO term
olfactory bulb development	3.17e-06	0	dependent GO term
RNA splicing	3.29e-06	0	dependent GO term
olfactory lobe development	3.47e-06	0	dependent GO term
positive regulation of gene expression	3.5e-06	0.6	dependent GO term
proteolysis involved in cellular protein catabolic process	3.74e-06	0	dependent GO term
positive regulation of cellular metabolic process	3.75e-06	0.393939	dependent GO term
intraspecies interaction between organisms	3.78e-06	1	dependent GO term
social behavior	3.78e-06	1	dependent GO term
GPI anchor metabolic process	3.78e-06	0	dependent GO term
immune response-regulating signaling pathway	3.85e-06	0.625	dependent GO term
positive regulation of interferon-gamma production	4.11e-06	1	dependent GO term
cellular response to topologically incorrect protein	4.11e-06	1	dependent GO term
macromolecule metabolic process	4.28e-06	0.393939	dependent GO term
hydrogen peroxide biosynthetic process	4.35e-06	0.857143	dependent GO term
cellular response to fibroblast growth factor stimulus	4.39e-06	0.285714	dependent GO term
cellular protein catabolic process	4.41e-06	0	dependent GO term
peroxisome organization	4.47e-06	0	dependent GO term
negative regulation of behavior	4.47e-06	0	dependent GO term
DNA biosynthetic process	4.84e-06	0	dependent GO term
positive regulation of macromolecule biosynthetic process	5.19e-06	0.6	dependent GO term
autophagy	5.19e-06	0	dependent GO term
vascular endothelial growth factor receptor signaling pathway	5.23e-06	0.666667	dependent GO term
reciprocal DNA recombination	5.38e-06	0	dependent GO term
reciprocal meiotic recombination	5.38e-06	0	dependent GO term
activation of JUN kinase activity	5.38e-06	0.25	dependent GO term
positive regulation of nucleobase-containing compound metabolic process	5.39e-06	0.6	dependent GO term
nucleobase-containing compound biosynthetic process	5.72e-06	0.0833333	dependent GO term
positive regulation of macromolecule metabolic process	5.91e-06	0.6	dependent GO term
cGMP metabolic process	6.08e-06	0	dependent GO term
positive regulation of actin filament polymerization	6.08e-06	0	dependent GO term
positive regulation of pathway-restricted SMAD protein phosphorylation	6.12e-06	0.75	dependent GO term
regulation of actin filament length	6.48e-06	0.166667	dependent GO term
regulation of actin polymerization or depolymerization	6.48e-06	0.166667	dependent GO term
positive regulation of nitrogen compound metabolic process	6.5e-06	0.6	dependent GO term
positive regulation of blood pressure	6.54e-06	1	dependent GO term
mating	6.54e-06	1	dependent GO term
nucleotide-excision repair	6.54e-06	0.333333	dependent GO term
ER-nucleus signaling pathway	6.54e-06	1	dependent GO term
ER-nucleus signaling pathway	6.54e-06	0.666667	dependent GO term
glycolipid biosynthetic process	6.54e-06	0	dependent GO term
cellular response to estradiol stimulus	6.74e-06	1	dependent GO term
positive regulation of cellular metabolic process	6.87e-06	0.6	dependent GO term
positive regulation of immune system process	7.04e-06	0.5	dependent GO term
aromatic compound biosynthetic process	7.23e-06	0.0833333	dependent GO term
response to hypoxia	7.25e-06	0.333333	dependent GO term
heterocycle biosynthetic process	7.28e-06	0.0833333	dependent GO term
vesicle localization	7.39e-06	0.2	dependent GO term
response to decreased oxygen levels	7.61e-06	0.333333	dependent GO term
cellular metabolic process	7.72e-06	0.393939	dependent GO term
binding of sperm to zona pellucida	7.78e-06	0.25	dependent GO term
homophilic cell adhesion	7.9e-06	0	dependent GO term
circadian rhythm	8.16e-06	0.6	dependent GO term
targeting of mRNA for destruction involved in RNA interference	8.32e-06	0	dependent GO term
production of siRNA involved in RNA interference	8.32e-06	0	dependent GO term
operant conditioning	8.32e-06	0.333333	dependent GO term
spinal cord oligodendrocyte cell differentiation	8.32e-06	0.5	dependent GO term
spinal cord oligodendrocyte cell fate specification	8.32e-06	0.5	dependent GO term
cellular response to cycloheximide	8.32e-06	1	dependent GO term
meiotic chromosome condensation	8.32e-06	0	dependent GO term
reelin-mediated signaling pathway	8.32e-06	0.5	dependent GO term
S-adenosylmethionine biosynthetic process	8.32e-06	1	dependent GO term
positive regulation of somatostatin secretion	8.32e-06	1	dependent GO term
regulation of muscle filament sliding	8.32e-06	0.5	dependent GO term
activation of immune response	8.46e-06	0.625	dependent GO term
sperm-egg recognition	8.71e-06	0.25	dependent GO term
cellular nitrogen compound biosynthetic process	8.82e-06	0.0833333	dependent GO term
lymphocyte activation	8.87e-06	0.533333	dependent GO term
cellular response to steroid hormone stimulus	8.98e-06	1	dependent GO term
extrinsic apoptotic signaling pathway via death domain receptors	9.16e-06	0.666667	dependent GO term
chemorepulsion involved in postnatal olfactory bulb interneuron migration	9.5e-06	0	dependent GO term
translational frameshifting	9.5e-06	0	dependent GO term
regulation of translational termination	9.5e-06	0	dependent GO term
positive regulation of translational termination	9.5e-06	0	dependent GO term
positive regulation of endocytic recycling	9.5e-06	0	dependent GO term
MHC protein complex assembly	9.5e-06	1	dependent GO term
MHC class I protein complex assembly	9.5e-06	1	dependent GO term
positive regulation of metabolic process	9.7e-06	0.393939	dependent GO term
telencephalon cell migration	9.76e-06	0	dependent GO term
positive regulation of cellular biosynthetic process	9.94e-06	0.6	dependent GO term
mRNA processing	1.01e-05	0	dependent GO term
neurotransmitter transport	1.02e-05	0.2	dependent GO term
organic cyclic compound biosynthetic process	1.04e-05	0.0833333	dependent GO term
response to oxygen levels	1.09e-05	0.333333	dependent GO term
negative regulation of macromolecule metabolic process	1.15e-05	0.393939	dependent GO term
locomotory behavior	1.16e-05	0.555556	dependent GO term
forebrain cell migration	1.17e-05	0	dependent GO term
cellular modified amino acid biosynthetic process	1.17e-05	0	dependent GO term
negative regulation of hemostasis	1.19e-05	0.6	dependent GO term
negative regulation of blood coagulation	1.19e-05	0.6	dependent GO term
cell-cell recognition	1.19e-05	0.25	dependent GO term
positive regulation of biosynthetic process	1.2e-05	0.6	dependent GO term
response to unfolded protein	1.24e-05	1	dependent GO term
ribonucleoprotein complex assembly	1.25e-05	0.166667	dependent GO term
positive regulation of metabolic process	1.34e-05	0.6	dependent GO term
RNA metabolic process	1.35e-05	0.0833333	dependent GO term
protein catabolic process	1.38e-05	0	dependent GO term
DNA-dependent DNA replication	1.39e-05	0.125	dependent GO term
negative regulation of RNA metabolic process	1.44e-05	0.393939	dependent GO term
actin polymerization or depolymerization	1.44e-05	0.166667	dependent GO term
negative regulation of coagulation	1.45e-05	0.6	dependent GO term
regulation of pathway-restricted SMAD protein phosphorylation	1.45e-05	0.75	dependent GO term
regulation of neurotransmitter levels	1.5e-05	0.2	dependent GO term
transmembrane receptor protein tyrosine kinase signaling pathway	1.53e-05	0.5	dependent GO term
positive regulation of protein polymerization	1.55e-05	0	dependent GO term
ribonucleoprotein complex subunit organization	1.58e-05	0.166667	dependent GO term
autophagic vacuole assembly	1.64e-05	0	dependent GO term
intracellular mRNA localization	1.66e-05	0	dependent GO term
oligodendrocyte progenitor proliferation	1.66e-05	1	dependent GO term
regulation of oligodendrocyte progenitor proliferation	1.66e-05	1	dependent GO term
vesicle targeting, rough ER to cis-Golgi	1.66e-05	0	dependent GO term
COPII vesicle coating	1.66e-05	0	dependent GO term
vein smooth muscle contraction	1.66e-05	1	dependent GO term
epithelial fluid transport	1.66e-05	1	dependent GO term
negative regulation of luteinizing hormone secretion	1.66e-05	0.5	dependent GO term
positive regulation of telomere maintenance	1.66e-05	0	dependent GO term
microtubule anchoring at centrosome	1.66e-05	0.5	dependent GO term
primary metabolic process	1.68e-05	0.393939	dependent GO term
cellular macromolecule catabolic process	1.76e-05	0	dependent GO term
cellular response to growth factor stimulus	1.78e-05	0.5	dependent GO term
protein lipidation	1.81e-05	0	dependent GO term
multi-organism behavior	2e-05	1	dependent GO term
response to topologically incorrect protein	2e-05	1	dependent GO term
pathway-restricted SMAD protein phosphorylation	2.06e-05	0.75	dependent GO term
antigen receptor-mediated signaling pathway	2.09e-05	0.625	dependent GO term
antigen receptor-mediated signaling pathway	2.09e-05	0.5	dependent GO term
phosphatidylinositol biosynthetic process	2.1e-05	0	dependent GO term
establishment of organelle localization	2.13e-05	0.2	independent GO term
lipoprotein biosynthetic process	2.31e-05	0	dependent GO term
response to diacyl bacterial lipopeptide	2.39e-05	0.75	dependent GO term
detection of bacterial lipoprotein	2.39e-05	0.75	dependent GO term
detection of bacterial lipopeptide	2.39e-05	0.75	dependent GO term
detection of diacyl bacterial lipopeptide	2.39e-05	0.75	dependent GO term
cellular response to diacyl bacterial lipopeptide	2.39e-05	0.75	dependent GO term
neutrophil aggregation	2.39e-05	0.5	dependent GO term
endonucleolytic cleavage to generate mature 3'-end of SSU-rRNA from (SSU-rRNA, 5.8S rRNA, LSU-rRNA)	2.39e-05	0	dependent GO term
endonucleolytic cleavage in ITS1 to separate SSU-rRNA from 5.8S rRNA and LSU-rRNA from tricistronic rRNA transcript (SSU-rRNA, 5.8S rRNA, LSU-rRNA)	2.39e-05	0	dependent GO term
regulation of Rho protein signal transduction	2.42e-05	0.2	dependent GO term
positive regulation of T cell proliferation	2.42e-05	1	dependent GO term
response to endoplasmic reticulum stress	2.54e-05	1	dependent GO term
glycolipid metabolic process	2.54e-05	0	dependent GO term
mRNA metabolic process	2.67e-05	0	dependent GO term
rhythmic process	2.67e-05	0.75	independent GO term
regulation of stem cell differentiation	2.77e-05	0.333333	dependent GO term
COPII-coated vesicle budding	2.77e-05	0	dependent GO term
glial cell fate specification	2.77e-05	0.5	dependent GO term
oligodendrocyte cell fate specification	2.77e-05	0.5	dependent GO term
positive regulation of dendritic spine morphogenesis	2.77e-05	0	dependent GO term
positive regulation of dendritic spine morphogenesis	2.77e-05	0.5	dependent GO term
succinyl-CoA metabolic process	2.77e-05	0	dependent GO term
regulation of serotonin secretion	2.77e-05	0.5	dependent GO term
regulation of somatostatin secretion	2.77e-05	1	dependent GO term
transcription initiation from RNA polymerase I promoter	2.77e-05	0	dependent GO term
calcium ion transport	2.8e-05	0.4	dependent GO term
Roundabout signaling pathway	2.85e-05	0	dependent GO term
substrate-dependent cerebral cortex tangential migration	2.85e-05	0	dependent GO term
cerebral cortex tangential migration using cell-cell interactions	2.85e-05	0	dependent GO term
postnatal olfactory bulb interneuron migration	2.85e-05	0	dependent GO term
translational termination	2.85e-05	0	dependent GO term
positive regulation of translational elongation	2.85e-05	0	dependent GO term
oncostatin-M-mediated signaling pathway	2.85e-05	0.666667	dependent GO term
regulation of myoblast fusion	2.85e-05	0	dependent GO term
positive regulation of myoblast fusion	2.85e-05	0	dependent GO term
regulation of endocytic recycling	2.85e-05	0	dependent GO term
endomembrane system organization	2.85e-05	0.333333	independent GO term
notochord formation	2.85e-05	0	dependent GO term
negative regulation of extracellular matrix disassembly	2.85e-05	1	dependent GO term
regulation of amine transport	3.03e-05	1	independent GO term
regulation of endothelial cell migration	3.03e-05	1	dependent GO term
negative regulation of gene expression	3.05e-05	0.393939	dependent GO term
regulation of interferon-gamma production	3.16e-05	1	dependent GO term
negative regulation of metabolic process	3.2e-05	0.393939	dependent GO term
regulation of neuron projection development	3.21e-05	1	dependent GO term
cytokine-mediated signaling pathway	3.23e-05	1	dependent GO term
cellular response to estrogen stimulus	3.27e-05	1	dependent GO term
membrane lipid biosynthetic process	3.43e-05	0	dependent GO term
divalent metal ion transport	3.51e-05	0.4	dependent GO term
transcription initiation from RNA polymerase II promoter	3.52e-05	0.25	dependent GO term
cell cycle	3.53e-05	0.571429	independent GO term
amine transport	3.58e-05	1	dependent GO term
alpha-amino acid biosynthetic process	3.58e-05	0	dependent GO term
divalent inorganic cation transport	3.66e-05	0.4	dependent GO term
recombinational repair	3.77e-05	0.25	dependent GO term
double-strand break repair via homologous recombination	3.77e-05	0.25	dependent GO term
reproductive behavior	3.87e-05	1	dependent GO term
organic substance metabolic process	3.96e-05	0.393939	dependent GO term
protein localization to synapse	3.96e-05	0.444444	dependent GO term
immune response-activating cell surface receptor signaling pathway	4.04e-05	0.5	dependent GO term
negative regulation of nucleobase-containing compound metabolic process	4.14e-05	0.393939	dependent GO term
negative regulation of transcription from RNA polymerase II promoter	4.15e-05	0.393939	dependent GO term
RNA interference	4.16e-05	0	dependent GO term
oligodendrocyte cell fate commitment	4.16e-05	0.5	dependent GO term
regulation of cardiac muscle contraction by regulation of the release of sequestered calcium ion	4.16e-05	0.5	dependent GO term
positive regulation of interleukin-5 production	4.16e-05	0.5	dependent GO term
negative regulation of epinephrine secretion	4.16e-05	0.5	dependent GO term
exonucleolytic nuclear-transcribed mRNA catabolic process involved in deadenylation-dependent decay	4.16e-05	0	dependent GO term
isocitrate metabolic process	4.16e-05	0	dependent GO term
regulation of telomere maintenance via telomerase	4.16e-05	0	dependent GO term
microtubule anchoring at microtubule organizing center	4.16e-05	0.5	dependent GO term
Rho protein signal transduction	4.33e-05	0.2	dependent GO term
interferon-gamma production	4.35e-05	1	dependent GO term
regulation of calcium ion-dependent exocytosis	4.41e-05	0.2	dependent GO term
secretion by cell	4.44e-05	0.2	dependent GO term
regulation of actin filament polymerization	4.52e-05	0	dependent GO term
regulation of leukocyte activation	4.56e-05	0.533333	dependent GO term
respiratory burst	4.82e-05	0.857143	dependent GO term
negative regulation of osteoblast differentiation	4.84e-05	0	dependent GO term
nucleotide-excision repair, DNA damage recognition	4.85e-05	0.2	dependent GO term
semaphorin-plexin signaling pathway involved in bone trabecula morphogenesis	4.85e-05	0.2	dependent GO term
negative regulation of nitrogen compound metabolic process	4.89e-05	0.393939	dependent GO term
DNA repair	4.97e-05	0	dependent GO term
DNA repair	4.97e-05	0.25	dependent GO term
positive regulation of immune response	4.99e-05	0.625	dependent GO term
DNA conformation change	5.02e-05	0	dependent GO term
smooth muscle contraction	5.23e-05	1	dependent GO term
smooth muscle contraction	5.23e-05	0.333333	dependent GO term
metaphase/anaphase transition of cell cycle	5.27e-05	0.105263	dependent GO term
metaphase/anaphase transition of mitotic cell cycle	5.27e-05	0.105263	dependent GO term
organ induction	5.41e-05	0.285714	dependent GO term
activation of Ras GTPase activity	5.41e-05	0.666667	dependent GO term
positive regulation of JUN kinase activity	5.53e-05	0.25	dependent GO term
negative regulation of protein kinase activity	5.56e-05	0.571429	dependent GO term
actin filament polymerization	5.61e-05	0	dependent GO term
maternal aggressive behavior	5.7e-05	1	dependent GO term
positive regulation of norepinephrine secretion	5.7e-05	1	dependent GO term
regulation of chemokine-mediated signaling pathway	5.7e-05	0	dependent GO term
negative regulation of chemokine-mediated signaling pathway	5.7e-05	0	dependent GO term
regulation of negative chemotaxis	5.7e-05	0	dependent GO term
dorsal/ventral axon guidance	5.7e-05	0	dependent GO term
leukemia inhibitory factor signaling pathway	5.7e-05	0.666667	dependent GO term
negative regulation of macrophage apoptotic process	5.7e-05	1	dependent GO term
polyprenol metabolic process	5.7e-05	0	dependent GO term
dolichol metabolic process	5.7e-05	0	dependent GO term
RNA splicing, via transesterification reactions	5.81e-05	0	dependent GO term
RNA splicing, via transesterification reactions with bulged adenosine as nucleophile	5.81e-05	0	dependent GO term
mRNA splicing, via spliceosome	5.81e-05	0	dependent GO term
pre-miRNA processing	5.82e-05	0	dependent GO term
positive regulation of uterine smooth muscle contraction	5.82e-05	0.333333	dependent GO term
vesicle targeting, to, from or within Golgi	5.82e-05	0	dependent GO term
regulation of cardiac muscle contraction by calcium ion signaling	5.82e-05	0.5	dependent GO term
positive regulation of natural killer cell differentiation	5.82e-05	0.5	dependent GO term
positive regulation of chemokine secretion	5.82e-05	0.5	dependent GO term
negative regulation of norepinephrine secretion	5.82e-05	0.5	dependent GO term
regulation of epinephrine secretion	5.82e-05	0.5	dependent GO term
regulation of luteinizing hormone secretion	5.82e-05	0.5	dependent GO term
somatostatin secretion	5.82e-05	1	dependent GO term
protein neddylation	5.82e-05	0	dependent GO term
very long-chain fatty acid catabolic process	5.82e-05	0.5	dependent GO term
macromolecule catabolic process	5.92e-05	0	dependent GO term
visual perception	6.22e-05	0	dependent GO term
extracellular matrix organization	6.36e-05	0.666667	dependent GO term
spinal cord development	6.43e-05	0	dependent GO term
extracellular structure organization	6.54e-05	0.666667	independent GO term
endocytosis	6.68e-05	0.4	dependent GO term
regulation of cell projection organization	6.77e-05	1	dependent GO term
cholesterol metabolic process	6.87e-05	0.666667	dependent GO term
regulation of protein kinase activity	6.88e-05	0.571429	dependent GO term
regulation of RNA biosynthetic process	6.95e-05	0.0833333	dependent GO term
positive regulation of cAMP biosynthetic process	6.97e-05	1	dependent GO term
immune system process	7.07e-05	0.533333	independent GO term
protein transport	7.08e-05	0	dependent GO term
regulation of cell activation	7.09e-05	0.533333	dependent GO term
immune response-regulating cell surface receptor signaling pathway	7.09e-05	0.5	dependent GO term
regulation of actin filament length	7.1e-05	0	dependent GO term
regulation of actin polymerization or depolymerization	7.1e-05	0	dependent GO term
Notch signaling pathway	7.1e-05	0.666667	dependent GO term
nucleic acid metabolic process	7.11e-05	0.0833333	dependent GO term
leukotriene production involved in inflammatory response	7.16e-05	0.5	dependent GO term
spindle midzone assembly involved in mitosis	7.16e-05	0.25	dependent GO term
RNA phosphodiester bond hydrolysis, endonucleolytic	7.16e-05	0	dependent GO term
cleavage involved in rRNA processing	7.16e-05	0	dependent GO term
endonucleolytic cleavage involved in rRNA processing	7.16e-05	0	dependent GO term
endonucleolytic cleavage of tricistronic rRNA transcript (SSU-rRNA, 5.8S rRNA, LSU-rRNA)	7.16e-05	0	dependent GO term
rRNA 3'-end processing	7.16e-05	0	dependent GO term
synaptic vesicle exocytosis	7.39e-05	0.2	dependent GO term
negative regulation of kinase activity	7.45e-05	0.571429	dependent GO term
organ regeneration	7.57e-05	1	dependent GO term
sensory perception of light stimulus	7.57e-05	0	dependent GO term
regulation of system process	7.66e-05	0.555556	independent GO term
small GTPase mediated signal transduction	7.66e-05	0.333333	dependent GO term
acetyl-CoA biosynthetic process from pyruvate	7.76e-05	1	dependent GO term
response to cycloheximide	7.76e-05	1	dependent GO term
chemokine secretion	7.76e-05	0.5	dependent GO term
regulation of chemokine secretion	7.76e-05	0.5	dependent GO term
acetyl-CoA biosynthetic process from pyruvate	7.76e-05	1	dependent GO term
epinephrine secretion	7.76e-05	0.5	dependent GO term
negative regulation of gonadotropin secretion	7.76e-05	0.5	dependent GO term
nuclear-transcribed mRNA catabolic process, exonucleolytic	7.76e-05	0	dependent GO term
activation-induced cell death of T cells	7.76e-05	0.5	dependent GO term
cellular copper ion homeostasis	7.76e-05	0	dependent GO term
muscle filament sliding	7.76e-05	0.5	dependent GO term
bundle of His cell to Purkinje myocyte communication	7.76e-05	0.5	dependent GO term
regulation of hemostasis	7.77e-05	0.6	independent GO term
regulation of blood coagulation	7.77e-05	0.6	dependent GO term
positive regulation of lymphocyte proliferation	7.81e-05	1	dependent GO term
lipoprotein metabolic process	7.81e-05	0	dependent GO term
protein monoubiquitination	7.99e-05	0.2	dependent GO term
positive regulation of mononuclear cell proliferation	8.05e-05	1	dependent GO term
organelle localization	8.19e-05	0.2	dependent GO term
MAPK cascade	8.27e-05	0.285714	dependent GO term
regulation of epithelial cell migration	8.31e-05	1	dependent GO term
sterol metabolic process	8.31e-05	0.666667	dependent GO term
alveolar secondary septum development	8.32e-05	0.285714	dependent GO term
substantia nigra development	8.32e-05	0.285714	dependent GO term
fibroblast growth factor receptor signaling pathway involved in orbitofrontal cortex development	8.32e-05	0.5	dependent GO term
glycerophospholipid biosynthetic process	8.56e-05	0	dependent GO term
receptor internalization	8.63e-05	1	dependent GO term
cellular macromolecule biosynthetic process	8.68e-05	0.0833333	dependent GO term
regulation of RNA metabolic process	8.98e-05	0.0833333	dependent GO term
reactive oxygen species metabolic process	9.04e-05	0.857143	dependent GO term
positive regulation of cAMP metabolic process	9.09e-05	1	dependent GO term
positive regulation of protein complex assembly	9.09e-05	0	dependent GO term
positive regulation of leukocyte proliferation	9.09e-05	1	dependent GO term
intracellular receptor signaling pathway	9.13e-05	0.393939	dependent GO term
mismatch repair	9.14e-05	0.6	dependent GO term
telomere maintenance	9.28e-05	0.6	dependent GO term
endothelial cell migration	9.37e-05	1	dependent GO term
regulation of lipid transport by regulation of transcription from RNA polymerase II promoter	9.5e-05	0.4	dependent GO term
negative regulation of gastric acid secretion	9.5e-05	1	dependent GO term
mammary duct terminal end bud growth	9.5e-05	0	dependent GO term
tube lumen cavitation	9.5e-05	0.333333	dependent GO term
salivary gland cavitation	9.5e-05	0.333333	dependent GO term
negative regulation of DNA endoreduplication	9.5e-05	0	dependent GO term
negative regulation of transferase activity	9.54e-05	0.571429	dependent GO term
regulation of coagulation	9.56e-05	0.6	independent GO term
cellular amino acid biosynthetic process	9.64e-05	0	dependent GO term
establishment of protein localization	9.77e-05	0	independent GO term
regulation of kinase activity	9.89e-05	0.571429	dependent GO term
telomere organization	9.97e-05	0.6	dependent GO term
positive regulation of vascular permeability	9.98e-05	0.333333	dependent GO term
regulation of uterine smooth muscle contraction	9.98e-05	0.333333	dependent GO term
response to redox state	9.98e-05	0.5	independent GO term
transcription from mitochondrial promoter	9.98e-05	0.5	dependent GO term
epinephrine transport	9.98e-05	0.5	dependent GO term
telomere maintenance via telomerase	9.98e-05	0	dependent GO term
actin-myosin filament sliding	9.98e-05	0.5	dependent GO term
nuclear pore organization	9.98e-05	0.5	dependent GO term
nuclear-transcribed mRNA catabolic process	0.0001	0	dependent GO term
secretion	0.000104	0.2	dependent GO term
regulation of Ras protein signal transduction	0.000105	0.333333	dependent GO term
single fertilization	0.000105	0.25	dependent GO term
meiosis I	0.000105	0	dependent GO term
regulation of JUN kinase activity	0.000105	0.25	dependent GO term
regulation of protein polymerization	0.000105	0	dependent GO term
positive regulation of cytoskeleton organization	0.000105	0	dependent GO term
regulation of T cell proliferation	0.000105	1	dependent GO term
phosphatidylinositol metabolic process	0.000105	0	dependent GO term
regulation of circadian rhythm	0.000107	0.6	independent GO term
vesicle-mediated transport	0.00011	0.2	independent GO term
macromolecule biosynthetic process	0.000111	0.0833333	dependent GO term
cell adhesion	0.000112	0	dependent GO term
biological adhesion	0.000114	0	independent GO term
actin polymerization or depolymerization	0.000114	0	dependent GO term
macroautophagy	0.000115	0	dependent GO term
positive regulation of cyclic nucleotide biosynthetic process	0.000116	1	dependent GO term
chemotaxis	0.000119	0.4	dependent GO term
taxis	0.00012	0.4	dependent GO term
regulation of transferase activity	0.000121	0.571429	dependent GO term
regulation of chemotaxis	0.000121	0	dependent GO term
regulation of axonogenesis	0.000121	0	dependent GO term
regulation of immune system process	0.000122	0.5	independent GO term
regulation of actin cytoskeleton organization	0.000124	0.166667	dependent GO term
adenylate cyclase-modulating G-protein coupled receptor signaling pathway	0.000124	0.555556	dependent GO term
cellular macromolecular complex assembly	0.000124	0.166667	dependent GO term
uterine smooth muscle contraction	0.000125	0.333333	dependent GO term
mitotic chromosome condensation	0.000125	0	dependent GO term
retrograde transport, vesicle recycling within Golgi	0.000125	0	dependent GO term
endothelial cell chemotaxis	0.000125	1	dependent GO term
succinate metabolic process	0.000125	0	dependent GO term
positive regulation of macrophage activation	0.000125	0.5	dependent GO term
luteinizing hormone secretion	0.000125	0.5	dependent GO term
copper ion homeostasis	0.000125	0	dependent GO term
complement activation, lectin pathway	0.000125	0.5	dependent GO term
positive regulation of growth hormone secretion	0.000125	1	dependent GO term
chromatin remodeling	0.000127	0.25	dependent GO term
protein polyubiquitination	0.000131	0.333333	dependent GO term
regulation of cellular component organization	0.000133	0.285714	independent GO term
positive regulation of nucleotide biosynthetic process	0.000133	1	dependent GO term
positive regulation of purine nucleotide biosynthetic process	0.000133	1	dependent GO term
negative regulation of cellular metabolic process	0.000134	0.393939	dependent GO term
positive regulation of T cell activation	0.000134	1	dependent GO term
positive regulation of cysteine-type endopeptidase activity	0.000141	0.5	dependent GO term
cyclic nucleotide biosynthetic process	0.000141	0	dependent GO term
cyclic purine nucleotide metabolic process	0.000141	0	dependent GO term
proteolysis involved in cellular protein catabolic process	0.000142	0.5	dependent GO term
specification of organ identity	0.000143	0.285714	dependent GO term
collagen fibril organization	0.000143	0.666667	dependent GO term
positive regulation of fibrinolysis	0.000143	0.6	dependent GO term
response to bacterial lipoprotein	0.000143	0.75	dependent GO term
response to bacterial lipopeptide	0.000143	0.75	dependent GO term
cellular response to bacterial lipoprotein	0.000143	0.75	dependent GO term
cellular response to bacterial lipopeptide	0.000143	0.75	dependent GO term
arachidonic acid metabolite production involved in inflammatory response	0.000143	0.5	dependent GO term
spindle midzone assembly	0.000143	0.25	dependent GO term
RNA phosphodiester bond hydrolysis	0.000143	0	dependent GO term
cerebral cortex tangential migration	0.000143	0	dependent GO term
sterol transmembrane transport	0.000143	1	dependent GO term
sterol import	0.000143	1	dependent GO term
cholesterol import	0.000143	1	dependent GO term
positive regulation of syncytium formation by plasma membrane fusion	0.000143	0	dependent GO term
regulation of cellular macromolecule biosynthetic process	0.000145	0.6	dependent GO term
VEGF-activated platelet-derived growth factor receptor signaling pathway	0.000146	0.6	dependent GO term
positive regulation of cell proliferation by VEGF-activated platelet derived growth factor receptor signaling pathway	0.000146	0.6	dependent GO term
metanephric glomerulus morphogenesis	0.000146	0.6	dependent GO term
metanephric glomerulus vasculature morphogenesis	0.000146	0.6	dependent GO term
metanephric glomerular capillary formation	0.000146	0.6	dependent GO term
regulation of smooth muscle cell-matrix adhesion	0.000146	0.8	dependent GO term
positive regulation of axonogenesis	0.000149	0.2	dependent GO term
DNA duplex unwinding	0.000151	0.125	dependent GO term
production of miRNAs involved in gene silencing by miRNA	0.000152	0	dependent GO term
positive regulation of mast cell activation involved in immune response	0.000152	0.5	dependent GO term
positive regulation of mast cell degranulation	0.000152	0.5	dependent GO term
kinetochore organization	0.000152	0	dependent GO term
RNA-dependent DNA replication	0.000152	0	dependent GO term
entrainment of circadian clock	0.000152	0.5	dependent GO term
metabolic process	0.000156	0.393939	independent GO term
positive regulation of transmembrane receptor protein serine/threonine kinase signaling pathway	0.000158	0.75	dependent GO term
positive regulation of cyclic nucleotide metabolic process	0.000158	1	dependent GO term
leukocyte chemotaxis	0.00016	1	dependent GO term
regulation of neuron differentiation	0.000161	1	dependent GO term
cell-type specific apoptotic process	0.000162	0.666667	dependent GO term
cellular protein catabolic process	0.000162	0.5	dependent GO term
glycerolipid biosynthetic process	0.000164	0	dependent GO term
gene expression	0.000165	0.0833333	dependent GO term
mRNA catabolic process	0.000165	0	dependent GO term
cell recognition	0.000165	0.25	independent GO term
regulation of MAPK cascade	0.000167	0.75	dependent GO term
regulation of organ formation	0.000169	0.285714	dependent GO term
regulation of T cell activation	0.00017	0.533333	dependent GO term
DNA metabolic process	0.000171	0.125	dependent GO term
lung development	0.000171	0.285714	dependent GO term
enzyme linked receptor protein signaling pathway	0.000175	0.5	dependent GO term
regulation of cellular macromolecule biosynthetic process	0.000176	0.0833333	dependent GO term
protein polyubiquitination	0.000178	0.105263	dependent GO term
respiratory tube development	0.000178	0.285714	dependent GO term
positive regulation of leukocyte chemotaxis	0.000178	0.4	dependent GO term
positive regulation of endopeptidase activity	0.000181	0.5	dependent GO term
blood coagulation	0.000181	0.666667	dependent GO term
membrane lipid metabolic process	0.000181	0	dependent GO term
developmental induction	0.000182	0.285714	dependent GO term
regulation of translation	0.000182	0.166667	dependent GO term
dsRNA fragmentation	0.000183	0	dependent GO term
production of small RNA involved in gene silencing by RNA	0.000183	0	dependent GO term
positive regulation of leukocyte degranulation	0.000183	0.5	dependent GO term
acetyl-CoA biosynthetic process	0.000183	1	dependent GO term
Rap protein signal transduction	0.000183	0.5	dependent GO term
regulation of release of sequestered calcium ion into cytosol by sarcoplasmic reticulum	0.000183	0.5	dependent GO term
positive regulation of renal sodium excretion	0.000183	1	dependent GO term
retinal metabolic process	0.000183	1	dependent GO term
regulation of natural killer cell differentiation	0.000183	0.5	dependent GO term
acetyl-CoA biosynthetic process	0.000183	1	dependent GO term
negative regulation of catecholamine secretion	0.000183	0.5	dependent GO term
NADH metabolic process	0.000183	0	dependent GO term
telomere maintenance via telomere lengthening	0.000183	0	dependent GO term
copper ion transport	0.000183	0	dependent GO term
regulation of Ras protein signal transduction	0.000185	0.2	dependent GO term
positive regulation of nucleotide metabolic process	0.000187	1	dependent GO term
positive regulation of purine nucleotide metabolic process	0.000187	1	dependent GO term
neurotransmitter transport	0.000189	0.666667	dependent GO term
regulation of extrinsic apoptotic signaling pathway	0.000189	0.666667	dependent GO term
hemostasis	0.000189	0.666667	dependent GO term
regulation of macromolecule biosynthetic process	0.00019	0.6	dependent GO term
G-protein coupled receptor signaling pathway, coupled to cyclic nucleotide second messenger	0.000191	0.555556	dependent GO term
single-organism developmental process	0.000193	0.393939	dependent GO term
positive regulation of transcription from RNA polymerase II promoter	0.000193	0.6	dependent GO term
coagulation	0.000194	0.666667	independent GO term
phospholipid biosynthetic process	0.000194	0	dependent GO term
cell-cell signaling involved in cell fate commitment	0.000197	0.285714	dependent GO term
positive regulation of uterine smooth muscle contraction	0.0002	1	dependent GO term
sperm ejaculation	0.0002	1	dependent GO term
regulation of gastric acid secretion	0.0002	1	dependent GO term
positive regulation of guanylate cyclase activity	0.0002	0	dependent GO term
regulation of syncytium formation by plasma membrane fusion	0.0002	0	dependent GO term
Toll signaling pathway	0.0002	0.666667	dependent GO term
nucleotide-excision repair, DNA incision	0.0002	0.333333	dependent GO term
macrophage apoptotic process	0.0002	1	dependent GO term
regulation of macrophage apoptotic process	0.0002	1	dependent GO term
SRP-dependent cotranslational protein targeting to membrane	0.0002	0.333333	dependent GO term
regulation of extracellular matrix disassembly	0.0002	1	dependent GO term
peptide cross-linking via chondroitin 4-sulfate glycosaminoglycan	0.0002	0.333333	dependent GO term
ion transmembrane transport	0.000203	0.4	dependent GO term
protein transport	0.000207	0.428571	dependent GO term
regulation of small GTPase mediated signal transduction	0.000208	0.333333	dependent GO term
negative regulation of response to external stimulus	0.000208	0	dependent GO term
T cell proliferation	0.000208	1	dependent GO term
regulation of transcription from RNA polymerase II promoter	0.000212	0.6	dependent GO term
developmental growth involved in morphogenesis	0.000212	0	dependent GO term
regulation of membrane potential	0.000214	0.444444	dependent GO term
hydrogen peroxide metabolic process	0.000216	0.857143	dependent GO term
positive regulation of mast cell activation	0.000216	0.5	dependent GO term
positive regulation of oligodendrocyte differentiation	0.000216	0.5	dependent GO term
positive regulation of urine volume	0.000216	1	dependent GO term
positive regulation of CREB transcription factor activity	0.000216	0.5	dependent GO term
semaphorin-plexin signaling pathway	0.000216	0	dependent GO term
interleukin-5 production	0.000216	0.5	dependent GO term
regulation of interleukin-5 production	0.000216	0.5	dependent GO term
serotonin secretion	0.000216	0.5	dependent GO term
regulation of gonadotropin secretion	0.000216	0.5	dependent GO term
regulation of growth hormone secretion	0.000216	1	dependent GO term
regulation of cellular component size	0.000217	0.166667	dependent GO term
positive regulation of peptidase activity	0.000217	0.5	dependent GO term
response to organophosphorus	0.000217	0.333333	independent GO term
regulation of macromolecule biosynthetic process	0.000225	0.0833333	dependent GO term
nucleotide-excision repair	0.000228	0.166667	dependent GO term
response to alkaloid	0.000232	1	dependent GO term
tissue regeneration	0.000236	0.8	dependent GO term
regulation of blood vessel size	0.000237	1	dependent GO term
nuclear RNA surveillance	0.000239	0	dependent GO term
nuclear mRNA surveillance	0.000239	0	dependent GO term
positive regulation of natural killer cell chemotaxis	0.000239	0.4	dependent GO term
postsynaptic membrane assembly	0.000239	0.25	dependent GO term
lipoxygenase pathway	0.000239	0.5	dependent GO term
telomere assembly	0.000239	0.5	dependent GO term
negative regulation of telomere maintenance via telomerase	0.000239	0.5	dependent GO term
potassium ion export	0.000239	0.75	dependent GO term
positive regulation of potassium ion transmembrane transport	0.000239	0.75	dependent GO term
maturation of 5.8S rRNA from tricistronic rRNA transcript (SSU-rRNA, 5.8S rRNA, LSU-rRNA)	0.000239	0	dependent GO term
regulation of immune response	0.000241	0.625	dependent GO term
regulation of tube size	0.000242	1	dependent GO term
negative regulation of protein phosphorylation	0.000244	0.571429	dependent GO term
regulation of wound healing	0.000244	0.6	dependent GO term
regulation of cAMP biosynthetic process	0.000244	1	dependent GO term
corticotropin hormone secreting cell differentiation	0.000249	0.285714	dependent GO term
orbitofrontal cortex development	0.000249	0.5	dependent GO term
ventricular zone neuroblast division	0.000249	0.5	dependent GO term
somatostatin receptor signaling pathway	0.000249	1	dependent GO term
somatostatin signaling pathway	0.000249	1	dependent GO term
vacuole organization	0.000249	0	dependent GO term
actin cytoskeleton organization	0.00025	0.166667	dependent GO term
cytoplasmic microtubule organization	0.000252	0.666667	dependent GO term
activation of NF-kappaB-inducing kinase activity	0.000252	0.5	dependent GO term
glial cell fate commitment	0.000252	0.5	dependent GO term
negative regulation of adaptive immune response based on somatic recombination of immune receptors built from immunoglobulin superfamily domains	0.000252	0.5	dependent GO term
regulation of telomere maintenance	0.000252	0	dependent GO term
regulation of ventricular cardiac muscle cell action potential	0.000252	0.5	dependent GO term
activation of cysteine-type endopeptidase activity involved in apoptotic process	0.000253	0.75	dependent GO term
regulation of neurotransmitter levels	0.000253	0.666667	dependent GO term
epithelium migration	0.000253	1	dependent GO term
epithelial cell migration	0.000253	1	dependent GO term
positive regulation of apoptotic process	0.000264	0.5	dependent GO term
organ development	0.000266	0.6	dependent GO term
aggressive behavior	0.000266	1	dependent GO term
protein deneddylation	0.000266	0	dependent GO term
cullin deneddylation	0.000266	0	dependent GO term
neuroendocrine cell differentiation	0.000266	0.333333	dependent GO term
synaptic vesicle priming	0.000266	0.666667	dependent GO term
DNA endoreduplication	0.000266	0	dependent GO term
regulation of DNA endoreduplication	0.000266	0	dependent GO term
nucleotide-excision repair, DNA gap filling	0.000266	0.333333	dependent GO term
regulation of guanylate cyclase activity	0.000266	0	dependent GO term
Arp2/3 complex-mediated actin nucleation	0.000266	0	dependent GO term
UV protection	0.000266	0.333333	dependent GO term
transcription-coupled nucleotide-excision repair	0.000266	0.333333	dependent GO term
notochord morphogenesis	0.000266	0	dependent GO term
urinary bladder smooth muscle contraction	0.000266	0.333333	dependent GO term
DNA geometric change	0.000267	0.125	dependent GO term
respiratory system development	0.000273	0.285714	dependent GO term
establishment of protein localization	0.000274	0.428571	independent GO term
intracellular receptor signaling pathway	0.000275	1	dependent GO term
tissue migration	0.000275	1	independent GO term
multicellular organismal development	0.000282	0.393939	dependent GO term
positive regulation of programmed cell death	0.000283	0.5	dependent GO term
regulation of cell projection assembly	0.00029	0.2	dependent GO term
glomerulus vasculature morphogenesis	0.000291	0.6	dependent GO term
glomerular capillary formation	0.000291	0.6	dependent GO term
activation of cysteine-type endopeptidase activity	0.000291	0.75	dependent GO term
thioester biosynthetic process	0.000291	1	dependent GO term
acyl-CoA biosynthetic process	0.000291	1	dependent GO term
positive regulation of dendritic spine development	0.000291	0	dependent GO term
release of sequestered calcium ion into cytosol by sarcoplasmic reticulum	0.000291	0.5	dependent GO term
plasminogen activation	0.000291	1	dependent GO term
positive regulation of dendritic spine development	0.000291	0.5	dependent GO term
positive regulation of natural killer cell activation	0.000291	0.5	dependent GO term
S-adenosylmethionine metabolic process	0.000291	1	dependent GO term
thioester biosynthetic process	0.000291	1	dependent GO term
acyl-CoA biosynthetic process	0.000291	1	dependent GO term
tricarboxylic acid metabolic process	0.000291	0	dependent GO term
release of sequestered calcium ion into cytosol by sarcoplasmic reticulum	0.000291	0	dependent GO term
adenohypophysis development	0.000291	1	dependent GO term
protein polymerization	0.000292	0	dependent GO term
regulation of lymphocyte proliferation	0.000292	1	dependent GO term
regulation of mononuclear cell proliferation	0.000298	1	dependent GO term
DNA repair	0.000299	0.2	dependent GO term
DNA repair	0.000299	0.2	dependent GO term
calcium ion transmembrane transport	0.000301	0.4	dependent GO term
regulation of actin filament-based process	0.000302	0.166667	dependent GO term
Ras protein signal transduction	0.000302	0.333333	dependent GO term
regulation of cellular biosynthetic process	0.000309	0.6	dependent GO term
negative regulation of molecular function	0.000309	0.571429	dependent GO term
transcription from RNA polymerase II promoter	0.00031	0.6	dependent GO term
negative regulation of phosphorylation	0.00031	0.571429	dependent GO term
JAK-STAT cascade	0.000312	0.5	dependent GO term
activation of MAPK activity	0.000312	0.25	dependent GO term
MAPK cascade	0.000317	0.75	dependent GO term
regulation of small GTPase mediated signal transduction	0.000319	0.2	dependent GO term
regulation of leukocyte chemotaxis	0.00032	0.4	dependent GO term
cell chemotaxis	0.000322	1	dependent GO term
actin filament organization	0.000325	0.166667	dependent GO term
regulation of leukocyte proliferation	0.000329	1	dependent GO term
signal release	0.000332	0.2	dependent GO term
cAMP biosynthetic process	0.000333	1	dependent GO term
DNA replication initiation	0.000333	0	dependent GO term
regulation of ryanodine-sensitive calcium-release channel activity	0.000333	0.5	dependent GO term
histone H2A ubiquitination	0.000333	0	dependent GO term
phasic smooth muscle contraction	0.000333	1	dependent GO term
mitochondrial RNA metabolic process	0.000333	0.5	dependent GO term
negative regulation of adaptive immune response	0.000333	0.5	dependent GO term
gonadotropin secretion	0.000333	0.5	dependent GO term
2-oxoglutarate metabolic process	0.000333	0	dependent GO term
gastric acid secretion	0.000333	1	dependent GO term
transcription from RNA polymerase I promoter	0.000333	0	dependent GO term
regulation of immune system process	0.000335	0.533333	independent GO term
response to purine-containing compound	0.000335	0.333333	dependent GO term
negative regulation of digestive system process	0.000342	1	dependent GO term
regulation of uterine smooth muscle contraction	0.000342	1	dependent GO term
female mating behavior	0.000342	1	dependent GO term
regulation of female receptivity	0.000342	1	dependent GO term
positive regulation of penile erection	0.000342	1	dependent GO term
positive regulation of T-helper 1 type immune response	0.000342	1	dependent GO term
vascular process in circulatory system	0.000342	1	dependent GO term
disruption by host of symbiont cells	0.000342	0.666667	dependent GO term
killing by host of symbiont cells	0.000342	0.666667	dependent GO term
positive regulation of tyrosine phosphorylation of Stat1 protein	0.000342	0.666667	dependent GO term
eosinophil chemotaxis	0.000342	1	dependent GO term
cotranslational protein targeting to membrane	0.000342	0.333333	dependent GO term
protein targeting to ER	0.000342	0.333333	dependent GO term
pulmonary valve development	0.000342	0.666667	dependent GO term
pulmonary valve morphogenesis	0.000342	0.666667	dependent GO term
peristalsis	0.000342	0.333333	dependent GO term
urinary tract smooth muscle contraction	0.000342	0.333333	dependent GO term
RNA catabolic process	0.000344	0	dependent GO term
positive regulation of cell death	0.000346	0.5	dependent GO term
regulation of neurogenesis	0.000346	1	dependent GO term
cyclic nucleotide metabolic process	0.000348	0	dependent GO term
regulation of cellular biosynthetic process	0.000351	0.0833333	dependent GO term
neuron projection guidance	0.000355	0	dependent GO term
axon guidance	0.000355	0	dependent GO term
regulation of biosynthetic process	0.000357	0.6	dependent GO term
cellular response to endogenous stimulus	0.000357	0.5	dependent GO term
regulation of nucleobase-containing compound metabolic process	0.000358	0.6	dependent GO term
RNA surveillance	0.000358	0	dependent GO term
response to potassium ion	0.000358	0.8	independent GO term
regulation of telomere maintenance via telomerase	0.000358	0.5	dependent GO term
positive regulation of nuclear-transcribed mRNA poly(A) tail shortening	0.000358	0.5	dependent GO term
immune response-activating signal transduction	0.000363	0.5	dependent GO term
positive regulation of cell proliferation	0.000363	0.5	dependent GO term
proteolysis	0.000366	0	dependent GO term
cytokinesis	0.000367	0.25	dependent GO term
regulation of blood pressure	0.000368	1	dependent GO term
regulation of blood pressure	0.000368	1	dependent GO term
regulation of action potential	0.000368	0.333333	independent GO term
cell fate commitment	0.00037	0.285714	dependent GO term
ribonucleoprotein complex biogenesis	0.000376	0.166667	dependent GO term
vesicle targeting	0.000377	0	independent GO term
regulation of dendritic spine morphogenesis	0.000377	0	dependent GO term
vascular smooth muscle contraction	0.000377	1	dependent GO term
regulation of dendritic spine morphogenesis	0.000377	0.5	dependent GO term
regulation of norepinephrine secretion	0.000377	0.5	dependent GO term
circadian regulation of gene expression	0.000377	0.5	dependent GO term
regulation of Rac GTPase activity	0.000377	0.5	dependent GO term
growth hormone secretion	0.000377	1	dependent GO term
fertilization	0.000379	0.25	dependent GO term
positive regulation of lymphocyte activation	0.000382	1	dependent GO term
mesenchymal cell proliferation	0.000384	0.5	dependent GO term
peptidyl-lysine modification	0.000389	0	dependent GO term
cellular response to cytokine stimulus	0.000392	1	dependent GO term
negative regulation of cellular macromolecule biosynthetic process	0.000398	0.393939	dependent GO term
regulation of biosynthetic process	0.0004	0.0833333	dependent GO term
regulation of nucleobase-containing compound metabolic process	0.000401	0.0833333	dependent GO term
protein catabolic process	0.000403	0.5	dependent GO term
ATP catabolic process	0.000403	0	dependent GO term
regulation of behavior	0.000411	0	dependent GO term
regulation of nitrogen compound metabolic process	0.000416	0.6	dependent GO term
regulation of gene expression	0.000417	0.0833333	dependent GO term
regulation of actin cytoskeleton organization	0.000418	0	dependent GO term
positive regulation of osteoclast differentiation	0.000424	1	dependent GO term
L-glutamate transport	0.000424	0	dependent GO term
regulation of mast cell degranulation	0.000424	0.5	dependent GO term
vesicle coating	0.000424	0	dependent GO term
protein targeting to plasma membrane	0.000424	0.5	dependent GO term
sarcoplasmic reticulum calcium ion transport	0.000424	0.5	dependent GO term
regulation of T-helper 1 type immune response	0.000424	0.5	dependent GO term
norepinephrine secretion	0.000424	0.5	dependent GO term
sarcoplasmic reticulum calcium ion transport	0.000424	0	dependent GO term
negative adaptation of signaling pathway	0.000424	1	dependent GO term
desensitization of G-protein coupled receptor protein signaling pathway	0.000424	1	dependent GO term
regulation of heart rate by cardiac conduction	0.000424	0.5	dependent GO term
negative regulation of locomotion	0.000426	0	dependent GO term
uterine smooth muscle contraction	0.000428	1	dependent GO term
olfactory bulb interneuron development	0.000428	0	dependent GO term
3'-UTR-mediated mRNA stabilization	0.000428	0.333333	dependent GO term
corticosteroid receptor signaling pathway	0.000428	1	dependent GO term
negative regulation of DNA-dependent DNA replication	0.000428	0	dependent GO term
positive regulation of astrocyte differentiation	0.000428	0.666667	dependent GO term
ER overload response	0.000428	1	dependent GO term
mast cell chemotaxis	0.000428	1	dependent GO term
positive regulation of monocyte chemotaxis	0.000428	1	dependent GO term
positive regulation of fever generation	0.000428	1	dependent GO term
establishment of protein localization to endoplasmic reticulum	0.000428	0.333333	dependent GO term
regulation of cAMP metabolic process	0.000429	1	dependent GO term
regulation of cyclic nucleotide biosynthetic process	0.000429	1	dependent GO term
Ras protein signal transduction	0.000432	0.2	dependent GO term
cellular modified amino acid metabolic process	0.000434	0	dependent GO term
glycerophospholipid metabolic process	0.000434	0	dependent GO term
response to morphine	0.000439	0.555556	dependent GO term
actin filament-based process	0.000446	0.166667	independent GO term
nucleobase-containing compound metabolic process	0.000455	0.0833333	dependent GO term
digestive tract morphogenesis	0.000457	0.333333	dependent GO term
response to ketone	0.000457	1	independent GO term
regulation of nitrogen compound metabolic process	0.00046	0.0833333	dependent GO term
regulation of purine nucleotide biosynthetic process	0.000469	1	dependent GO term
positive regulation of T cell mediated cytotoxicity	0.000474	0.857143	dependent GO term
inositol phosphate-mediated signaling	0.000474	0.666667	dependent GO term
regulation of mast cell activation involved in immune response	0.000474	0.5	dependent GO term
meiotic chromosome segregation	0.000474	0	dependent GO term
zymogen activation	0.000474	1	dependent GO term
intra-Golgi vesicle-mediated transport	0.000474	0	dependent GO term
regulation of urine volume	0.000474	1	dependent GO term
natural killer cell differentiation	0.000474	0.5	dependent GO term
regulation of macrophage activation	0.000474	0.5	dependent GO term
serotonin transport	0.000474	0.5	dependent GO term
natural killer cell differentiation	0.000474	1	dependent GO term
ubiquitin-dependent protein catabolic process	0.000476	0	dependent GO term
ubiquitin-dependent protein catabolic process	0.000476	0.2	dependent GO term
translation	0.000478	0.166667	dependent GO term
response to virus	0.000481	0	dependent GO term
outflow tract morphogenesis	0.000483	0.333333	dependent GO term
regulation of nucleotide biosynthetic process	0.000483	1	dependent GO term
renal system vasculature morphogenesis	0.000485	0.6	dependent GO term
kidney vasculature morphogenesis	0.000485	0.6	dependent GO term
smooth muscle cell-matrix adhesion	0.000485	0.8	dependent GO term
replication fork processing	0.000485	0.6	dependent GO term
response to isoquinoline alkaloid	0.000486	0.555556	dependent GO term
cellular macromolecule catabolic process	0.000489	0.5	dependent GO term
metal ion transport	0.000489	0.4	dependent GO term
regulation of Golgi inheritance	0.000499	0.428571	dependent GO term
thyroid-stimulating hormone-secreting cell differentiation	0.000499	0.285714	dependent GO term
subthalamus development	0.000499	0.285714	dependent GO term
cell proliferation involved in outflow tract morphogenesis	0.000499	0.333333	dependent GO term
endodermal digestive tract morphogenesis	0.000499	0.333333	dependent GO term
cardiac cell fate specification	0.000499	0.333333	dependent GO term
regulation of cardiac cell fate specification	0.000499	0.333333	dependent GO term
natural killer cell chemotaxis	0.000501	0.4	dependent GO term
regulation of natural killer cell chemotaxis	0.000501	0.4	dependent GO term
presynaptic membrane assembly	0.000501	0.25	dependent GO term
protein localization to chromosome, telomeric region	0.000501	0.5	dependent GO term
very-low-density lipoprotein particle clearance	0.000501	1	dependent GO term
somatic diversification of immune receptors via somatic mutation	0.000501	0	dependent GO term
somatic hypermutation of immunoglobulin genes	0.000501	0	dependent GO term
regulation of nuclear-transcribed mRNA catabolic process, deadenylation-dependent decay	0.000501	0.5	dependent GO term
regulation of nuclear-transcribed mRNA poly(A) tail shortening	0.000501	0.5	dependent GO term
ncRNA 3'-end processing	0.000501	0	dependent GO term
regulation of T cell activation	0.000506	1	dependent GO term
regulation of T cell activation	0.000506	1	dependent GO term
anatomical structure development	0.00051	0.393939	dependent GO term
modification-dependent protein catabolic process	0.00051	0	dependent GO term
modification-dependent protein catabolic process	0.00051	0.2	dependent GO term
BMP signaling pathway	0.000511	0.75	dependent GO term
extrinsic apoptotic signaling pathway	0.000515	0.666667	dependent GO term
positive regulation of leukocyte migration	0.000523	0.4	dependent GO term
regulation of penile erection	0.000523	1	dependent GO term
positive regulation of defense response to virus by host	0.000523	1	dependent GO term
positive regulation of vascular endothelial growth factor receptor signaling pathway	0.000523	1	dependent GO term
reverse cholesterol transport	0.000523	1	dependent GO term
regulation of ventricular cardiac muscle cell membrane repolarization	0.000523	0.666667	dependent GO term
translesion synthesis	0.000523	0	dependent GO term
cranial suture morphogenesis	0.000523	0	dependent GO term
trophectodermal cell differentiation	0.000527	0.5	dependent GO term
adaptation of signaling pathway	0.000527	1	dependent GO term
cell communication involved in cardiac conduction	0.000527	0.5	independent GO term
apoptotic cell clearance	0.000527	1	dependent GO term
modification-dependent macromolecule catabolic process	0.000528	0	dependent GO term
modification-dependent macromolecule catabolic process	0.000528	0.2	dependent GO term
immune response-regulating signaling pathway	0.000532	0.5	dependent GO term
positive regulation of leukocyte activation	0.000532	1	dependent GO term
regulation of protein phosphorylation	0.000538	0.571429	dependent GO term
regulation of nervous system development	0.000539	1	dependent GO term
sexual reproduction	0.000551	0.25	dependent GO term
protein heterooligomerization	0.000556	0.25	dependent GO term
double-strand break repair	0.000556	0.25	dependent GO term
positive regulation of immune system process	0.000561	0.625	dependent GO term
exocytosis	0.000563	0.428571	dependent GO term
establishment of synaptic vesicle localization	0.000567	0.2	dependent GO term
synaptic vesicle transport	0.000567	0.2	dependent GO term
cellular response to glucocorticoid stimulus	0.000568	1	dependent GO term
regeneration	0.000568	1	dependent GO term
leukocyte migration	0.000568	1	dependent GO term
cellular response to stress	0.00057	0	dependent GO term
cellular response to organic cyclic compound	0.000572	1	dependent GO term
regulation of T cell mediated cytotoxicity	0.000582	0.857143	dependent GO term
acidic amino acid transport	0.000582	0	dependent GO term
positive regulation of blood vessel endothelial cell migration	0.000582	1	dependent GO term
renal sodium excretion	0.000582	1	dependent GO term
regulation of renal sodium excretion	0.000582	1	dependent GO term
norepinephrine transport	0.000582	0.5	dependent GO term
regulation of cellular component size	0.000586	0	dependent GO term
lymphocyte proliferation	0.000586	1	dependent GO term
receptor-mediated endocytosis	0.000588	0.4	dependent GO term
histone acetylation	0.000588	0.25	dependent GO term
receptor-mediated endocytosis	0.000588	1	dependent GO term
positive regulation of cysteine-type endopeptidase activity involved in apoptotic process	0.000588	0.75	dependent GO term
negative regulation of macromolecule biosynthetic process	0.00059	0.393939	dependent GO term
regulation of immune effector process	0.000596	1	dependent GO term
mononuclear cell proliferation	0.000596	1	dependent GO term
cellular response to corticosteroid stimulus	0.000598	1	dependent GO term
regulation of axonogenesis	0.000604	1	dependent GO term
positive regulation of cell activation	0.000615	1	dependent GO term
receptor metabolic process	0.00062	1	dependent GO term
stem cell differentiation	0.000627	0.333333	dependent GO term
regulation of translational elongation	0.000627	0	dependent GO term
endocytic recycling	0.000627	0	dependent GO term
actin nucleation	0.000627	0	dependent GO term
eosinophil migration	0.000627	1	dependent GO term
positive regulation of heat generation	0.000627	1	dependent GO term
regulation of fever generation	0.000627	1	dependent GO term
negative regulation of extrinsic apoptotic signaling pathway via death domain receptors	0.000627	0.666667	dependent GO term
extracellular matrix disassembly	0.000627	1	dependent GO term
clathrin coat assembly	0.000627	0	dependent GO term
cellular response to interferon-beta	0.000627	0	dependent GO term
organ formation	0.00063	0.285714	dependent GO term
positive regulation of apoptotic signaling pathway	0.000637	0.666667	dependent GO term
synaptic vesicle localization	0.000637	0.2	dependent GO term
internal peptidyl-lysine acetylation	0.000637	0.25	dependent GO term
positive regulation of transcription from RNA polymerase II promoter	0.000638	0.333333	dependent GO term
heterocycle metabolic process	0.00064	0.0833333	dependent GO term
gene silencing by miRNA	0.00064	0	dependent GO term
regulation of leukocyte degranulation	0.00064	0.5	dependent GO term
tetrapyrrole biosynthetic process	0.00064	0	dependent GO term
porphyrin-containing compound biosynthetic process	0.00064	0	dependent GO term
complement activation, classical pathway	0.00064	0.5	dependent GO term
regulation of calcium ion import	0.00064	0.5	dependent GO term
nuclear-transcribed mRNA catabolic process, deadenylation-dependent decay	0.00064	0	dependent GO term
cell-substrate adhesion	0.000654	1	dependent GO term
protein localization	0.000661	0	dependent GO term
ERBB signaling pathway	0.000662	0.5	dependent GO term
cell differentiation	0.000664	0.393939	dependent GO term
positive regulation of cytokine production	0.000665	1	dependent GO term
enucleate erythrocyte differentiation	0.000668	0.2	dependent GO term
embryonic process involved in female pregnancy	0.000668	0.2	dependent GO term
presynaptic membrane organization	0.000668	0.25	independent GO term
neuron cell-cell adhesion	0.000668	0.25	dependent GO term
protein deneddylation	0.000668	0.5	dependent GO term
cullin deneddylation	0.000668	0.5	dependent GO term
modulation by organism of defense response of other organism involved in symbiotic interaction	0.000668	0.75	dependent GO term
positive regulation by organism of defense response of other organism involved in symbiotic interaction	0.000668	0.75	dependent GO term
modulation by symbiont of host defense response	0.000668	0.75	dependent GO term
positive regulation by symbiont of host defense response	0.000668	0.75	dependent GO term
modulation by organism of immune response of other organism involved in symbiotic interaction	0.000668	0.75	dependent GO term
modulation by organism of innate immune response in other organism involved in symbiotic interaction	0.000668	0.75	dependent GO term
pathogen-associated molecular pattern dependent modulation by organism of innate immune response in other organism involved in symbiotic interaction	0.000668	0.75	dependent GO term
positive regulation by organism of immune response of other organism involved in symbiotic interaction	0.000668	0.75	dependent GO term
positive regulation by organism of innate immune response in other organism involved in symbiotic interaction	0.000668	0.75	dependent GO term
pathogen-associated molecular pattern dependent induction by organism of innate immune response of other organism involved in symbiotic interaction	0.000668	0.75	dependent GO term
modulation by symbiont of host immune response	0.000668	0.75	dependent GO term
modulation by symbiont of host innate immune response	0.000668	0.75	dependent GO term
pathogen-associated molecular pattern dependent modulation by symbiont of host innate immune response	0.000668	0.75	dependent GO term
positive regulation by symbiont of host immune response	0.000668	0.75	dependent GO term
positive regulation by symbiont of host innate immune response	0.000668	0.75	dependent GO term
pathogen-associated molecular pattern dependent induction by symbiont of host innate immune response	0.000668	0.75	dependent GO term
radial glial cell differentiation	0.000668	0.5	dependent GO term
regulation of attachment of spindle microtubules to kinetochore	0.000668	0.25	dependent GO term
enzyme linked receptor protein signaling pathway	0.000673	0.5	dependent GO term
leukocyte proliferation	0.000675	1	dependent GO term
positive regulation of developmental process	0.000677	0.285714	dependent GO term
cellular aromatic compound metabolic process	0.00068	0.0833333	dependent GO term
RNA splicing	0.000685	0	dependent GO term
regulation of cysteine-type endopeptidase activity	0.000685	0.5	dependent GO term
RNA splicing	0.000685	0	dependent GO term
alpha-amino acid metabolic process	0.000685	0	dependent GO term
cellular biosynthetic process	0.000688	0.0833333	dependent GO term
peptidyl-lysine acetylation	0.000689	0.25	dependent GO term
cell-cell adhesion	0.00069	0	dependent GO term
positive regulation of cellular component organization	0.000692	0.5	dependent GO term
antigen processing and presentation of peptide antigen via MHC class I	0.000701	0.857143	dependent GO term
regulation of vascular permeability	0.000701	0.333333	dependent GO term
dendritic spine morphogenesis	0.000701	0	dependent GO term
fluid transport	0.000701	1	dependent GO term
dendritic spine morphogenesis	0.000701	0.5	dependent GO term
regulation of natural killer cell activation	0.000701	0.5	dependent GO term
muscle contraction	0.000706	1	dependent GO term
muscle contraction	0.000706	0.333333	dependent GO term
internal protein amino acid acetylation	0.000707	0.25	dependent GO term
positive regulation of phosphorus metabolic process	0.000707	1	dependent GO term
positive regulation of phosphate metabolic process	0.000707	1	dependent GO term
cyclic nucleotide biosynthetic process	0.000707	1	dependent GO term
cyclic purine nucleotide metabolic process	0.000707	1	dependent GO term
positive regulation of cysteine-type endopeptidase activity	0.000707	0.75	dependent GO term
regulation of Rho GTPase activity	0.000713	0.2	dependent GO term
negative regulation of protein modification process	0.000715	0.571429	dependent GO term
negative regulation of phosphorus metabolic process	0.000715	0.571429	dependent GO term
negative regulation of phosphate metabolic process	0.000715	0.571429	dependent GO term
regulation of actin filament-based process	0.000717	0	dependent GO term
negative regulation of cAMP-dependent protein kinase activity	0.000727	0.2	dependent GO term
cellular response to platelet-derived growth factor stimulus	0.000727	0.6	dependent GO term
telencephalon development	0.000738	0	dependent GO term
intrinsic apoptotic signaling pathway	0.000738	0.666667	dependent GO term
positive regulation of chemotaxis	0.00074	0.4	dependent GO term
insemination	0.000741	1	dependent GO term
positive regulation of catecholamine secretion	0.000741	1	dependent GO term
hyperosmotic salinity response	0.000741	1	dependent GO term
disruption of cells of other organism involved in symbiotic interaction	0.000741	0.666667	dependent GO term
killing of cells in other organism involved in symbiotic interaction	0.000741	0.666667	dependent GO term
cell cycle DNA replication	0.000741	0	dependent GO term
regulation of tyrosine phosphorylation of Stat1 protein	0.000741	0.666667	dependent GO term
positive regulation of protein export from nucleus	0.000741	0.333333	dependent GO term
formation of translation preinitiation complex	0.000741	0	dependent GO term
regulation of cell-cell adhesion mediated by integrin	0.000741	1	dependent GO term
craniofacial suture morphogenesis	0.000741	0	dependent GO term
cell adhesion	0.000742	0.666667	dependent GO term
cell adhesion	0.000742	0.666667	dependent GO term
actin filament organization	0.000749	0	dependent GO term
biological adhesion	0.000756	0.666667	independent GO term
biological adhesion	0.000756	0.666667	independent GO term
negative regulation of amine transport	0.000765	0.75	dependent GO term
membrane budding	0.000765	0	dependent GO term
platelet aggregation	0.000765	1	dependent GO term
pyruvate metabolic process	0.000765	1	dependent GO term
endoplasmic reticulum organization	0.000765	0	dependent GO term
regulation of excretion	0.000765	1	dependent GO term
regulation of ARF GTPase activity	0.000765	0	dependent GO term
negative regulation of interferon-gamma production	0.000765	0.5	dependent GO term
pyruvate metabolic process	0.000765	1	dependent GO term
negative regulation of amine transport	0.000765	0.5	dependent GO term
hypothalamus development	0.000765	0.5	dependent GO term
regulation of protein complex assembly	0.000772	0	dependent GO term
regulation of cell morphogenesis involved in differentiation	0.000794	0.333333	dependent GO term
regulation of cell morphogenesis involved in differentiation	0.000794	0	dependent GO term
purine ribonucleotide biosynthetic process	0.000794	0	dependent GO term
organic substance biosynthetic process	0.000795	0.0833333	dependent GO term
regulation of JNK cascade	0.000801	0.4	dependent GO term
regulation of JNK cascade	0.000801	0.25	dependent GO term
regulation of cyclic nucleotide metabolic process	0.000801	1	dependent GO term
cAMP metabolic process	0.000801	1	dependent GO term
stem cell development	0.000829	0.333333	dependent GO term
oxygen homeostasis	0.000831	0.333333	dependent GO term
regulation of microtubule polymerization	0.000832	0	dependent GO term
positive regulation of smooth muscle contraction	0.000832	0.333333	dependent GO term
dendritic spine organization	0.000832	0	independent GO term
dendritic spine organization	0.000832	0.5	independent GO term
adenylate cyclase-inhibiting G-protein coupled receptor signaling pathway	0.00084	0.555556	dependent GO term
regulation of cell development	0.000842	1	dependent GO term
negative regulation of cellular biosynthetic process	0.000844	0.393939	dependent GO term
single-organism behavior	0.000845	0.555556	dependent GO term
regulation of phosphorylation	0.000848	0.571429	dependent GO term
proteolysis involved in cellular protein catabolic process	0.000852	0.2	dependent GO term
response to immune response of other organism involved in symbiotic interaction	0.000859	0.75	dependent GO term
response to host immune response	0.000859	0.75	dependent GO term
microglial cell activation involved in immune response	0.000859	0.75	dependent GO term
telomere maintenance via telomerase	0.000859	0.5	dependent GO term
negative regulation of telomere maintenance	0.000859	0.5	dependent GO term
leukocyte migration involved in inflammatory response	0.000859	0.5	dependent GO term
leukocyte aggregation	0.000859	0.5	dependent GO term
positive regulation of mRNA catabolic process	0.000859	0.5	dependent GO term
ovulation cycle	0.000862	1	dependent GO term
negative regulation of endothelial cell apoptotic process	0.000864	1	dependent GO term
inflammatory cell apoptotic process	0.000864	1	dependent GO term
negative regulation of myeloid cell apoptotic process	0.000864	1	dependent GO term
regulation of monocyte chemotaxis	0.000864	1	dependent GO term
positive regulation of alpha-beta T cell proliferation	0.000864	1	dependent GO term
multi-multicellular organism process	0.000865	1	dependent GO term
cellular nitrogen compound metabolic process	0.000868	0.0833333	dependent GO term
transmembrane transport	0.000875	0.4	dependent GO term
purine nucleotide biosynthetic process	0.000877	0	dependent GO term
peptidyl-tyrosine phosphorylation	0.000889	1	dependent GO term
ameboidal cell migration	0.000889	1	dependent GO term
cellular response to dsRNA	0.000901	0	dependent GO term
posttranscriptional gene silencing	0.000901	0	dependent GO term
posttranscriptional gene silencing by RNA	0.000901	0	dependent GO term
positive regulation of stress fiber assembly	0.000901	0.5	dependent GO term
regulation of mast cell activation	0.000901	0.5	dependent GO term
regulation of ATPase activity	0.000901	1	dependent GO term
chromatin silencing	0.000901	0	dependent GO term
tricarboxylic acid cycle	0.000901	0	dependent GO term
tricarboxylic acid cycle	0.000901	0	dependent GO term
regulation of ATPase activity	0.000901	0.5	dependent GO term
regulation of cardiac muscle cell action potential	0.000901	0.5	dependent GO term
very long-chain fatty acid metabolic process	0.000901	0.5	dependent GO term
blood coagulation	0.000904	0.6	dependent GO term
positive regulation of endopeptidase activity	0.000904	0.75	dependent GO term
regulation of cell shape	0.000914	0.2	dependent GO term
peptidyl-tyrosine modification	0.000914	1	dependent GO term
multi-organism reproductive process	0.000927	1	dependent GO term
neuron projection development	0.000934	1	dependent GO term
biosynthetic process	0.000939	0.0833333	dependent GO term
ribonucleotide biosynthetic process	0.00094	0	dependent GO term
regulation of lymphocyte activation	0.000942	0.533333	dependent GO term
hemostasis	0.000947	0.6	dependent GO term
regulation of Rho protein signal transduction	0.000949	0.333333	dependent GO term
cellular response to calcium ion	0.000957	0.416667	dependent GO term
purine-containing compound biosynthetic process	0.000966	0	dependent GO term
protein acetylation	0.000969	0	dependent GO term
coagulation	0.000969	0.6	independent GO term
protein acetylation	0.000969	0.25	dependent GO term
cellular protein catabolic process	0.000971	0.2	dependent GO term
mast cell degranulation	0.000973	0.5	dependent GO term
acetyl-CoA metabolic process	0.000973	1	dependent GO term
regulation of oligodendrocyte differentiation	0.000973	0.5	dependent GO term
acetyl-CoA metabolic process	0.000973	1	dependent GO term
cardiac muscle cell contraction	0.000973	0.5	dependent GO term
regulation of cardiac muscle cell membrane potential	0.000973	0.5	dependent GO term
regulation of cardiac muscle cell contraction	0.000973	0.5	dependent GO term
ephrin receptor signaling pathway	0.000973	0.5	dependent GO term
cellular response to starvation	0.000978	0	dependent GO term
cytosolic calcium ion homeostasis	0.000979	1	dependent GO term
ribose phosphate biosynthetic process	0.000979	0	dependent GO term
negative regulation of biosynthetic process	0.00099	0.393939	dependent GO term
activation of immune response	0.000997	0.5	dependent GO term
olfactory bulb interneuron differentiation	0.000997	0	dependent GO term
tyrosine phosphorylation of Stat1 protein	0.000997	0.666667	dependent GO term
regulation of heat generation	0.000997	1	independent GO term
anterograde synaptic vesicle transport	0.000997	1	dependent GO term
organic cyclic compound metabolic process	0.000998	0.0833333	dependent GO term
positive regulation of MAPK cascade	0.000998	0.285714	dependent GO term
positive regulation of MAPK cascade	0.000998	0.5	dependent GO term
protein ubiquitination	0.001	0.2	dependent GO term
intracellular signal transduction	0.00101	0.285714	dependent GO term
DNA repair	0.00101	0.166667	dependent GO term
intracellular signal transduction	0.00101	0.666667	dependent GO term
cellular response to lipid	0.00102	1	dependent GO term
DNA topological change	0.00102	0	dependent GO term
chronic inflammatory response to antigenic stimulus	0.00102	1	dependent GO term
natural killer cell chemotaxis	0.00102	0.4	dependent GO term
regulation of natural killer cell chemotaxis	0.00102	0.4	dependent GO term
glomerulus morphogenesis	0.00102	0.6	dependent GO term
synaptic vesicle maturation	0.00102	0.2	dependent GO term
T cell mediated cytotoxicity	0.00105	0.857143	dependent GO term
bone morphogenesis	0.00105	0.5	dependent GO term
mast cell mediated immunity	0.00105	0.5	dependent GO term
regulation of myeloid leukocyte mediated immunity	0.00105	0.5	dependent GO term
mast cell activation involved in immune response	0.00105	0.5	dependent GO term
negative regulation of insulin receptor signaling pathway	0.00105	1	dependent GO term
regulation of dendritic spine development	0.00105	0	dependent GO term
regulation of dendritic spine development	0.00105	0.5	dependent GO term
cardiac conduction	0.00105	0.5	dependent GO term
mRNA export from nucleus	0.00105	0	dependent GO term
mRNA export from nucleus	0.00105	0.5	dependent GO term
cellular response to molecule of bacterial origin	0.00106	0.75	dependent GO term
positive regulation of organelle organization	0.00106	0	dependent GO term
positive regulation of T cell cytokine production	0.00107	0.4	dependent GO term
membrane assembly	0.00107	0.25	dependent GO term
interleukin-6-mediated signaling pathway	0.00107	0.5	dependent GO term
regulation of mRNA catabolic process	0.00107	0.5	dependent GO term
nuclear-transcribed mRNA poly(A) tail shortening	0.00107	0.5	dependent GO term
regulation of osteoblast differentiation	0.00108	0	dependent GO term
meiotic cell cycle	0.00109	0	dependent GO term
positive regulation of peptidase activity	0.00109	0.75	dependent GO term
axis specification	0.0011	0.333333	dependent GO term
vasculogenesis	0.0011	0.333333	dependent GO term
cytokinesis	0.00111	0.333333	dependent GO term
cytokinesis	0.00111	0.6	dependent GO term
microtubule-based movement	0.00113	0.5	dependent GO term
antigen processing and presentation of exogenous antigen	0.00113	0	dependent GO term
positive regulation of glial cell differentiation	0.00113	0.5	dependent GO term
histone ubiquitination	0.00113	0	dependent GO term
positive regulation of protein tyrosine kinase activity	0.00113	0.5	dependent GO term
regulation of Rac protein signal transduction	0.00113	0.5	dependent GO term
response to axon injury	0.00114	0.285714	dependent GO term
MyD88-dependent toll-like receptor signaling pathway	0.00114	0.75	dependent GO term
parturition	0.00114	1	dependent GO term
gastric acid secretion	0.00114	1	dependent GO term
DNA replication initiation	0.00114	0.333333	dependent GO term
positive regulation of protein complex disassembly	0.00114	0	dependent GO term
fever generation	0.00114	1	dependent GO term
phasic smooth muscle contraction	0.00114	0.333333	dependent GO term
behavioral response to pain	0.00114	0.333333	dependent GO term
steroid metabolic process	0.00116	0.666667	dependent GO term
phospholipid metabolic process	0.00116	0	dependent GO term
glycerolipid metabolic process	0.00117	0	dependent GO term
adenylate cyclase-modulating G-protein coupled receptor signaling pathway	0.00119	0.666667	dependent GO term
T cell receptor signaling pathway	0.00121	0.625	dependent GO term
T cell receptor signaling pathway	0.00121	0.5	dependent GO term
response to lipid	0.00121	1	independent GO term
ATP metabolic process	0.00121	0	dependent GO term
microtubule polymerization	0.00121	0	dependent GO term
positive regulation of actin filament bundle assembly	0.00121	0.5	dependent GO term
response to pH	0.00121	1	dependent GO term
spinal cord motor neuron differentiation	0.00121	0.5	dependent GO term
regulation of calcium ion transmembrane transporter activity	0.00121	0.5	dependent GO term
chromosome condensation	0.00121	0	dependent GO term
long-term synaptic potentiation	0.00121	0.5	dependent GO term
ATP catabolic process	0.00122	0.6	dependent GO term
regulation of exocytosis	0.00122	0.2	dependent GO term
regulation of cytoskeleton organization	0.00123	0.166667	dependent GO term
regulation of stress-activated MAPK cascade	0.00124	0.4	dependent GO term
muscle system process	0.00124	1	dependent GO term
regulation of stress-activated MAPK cascade	0.00124	0.25	dependent GO term
muscle system process	0.00124	0.333333	dependent GO term
regulation of early endosome to late endosome transport	0.00125	0.428571	dependent GO term
forebrain ventricular zone progenitor cell division	0.00125	0.5	dependent GO term
peptidyl-proline hydroxylation to 4-hydroxy-L-proline	0.00125	0.333333	dependent GO term
regulation of stress-activated protein kinase signaling cascade	0.00126	0.4	dependent GO term
regulation of stress-activated protein kinase signaling cascade	0.00126	0.25	dependent GO term
regulation of RNA biosynthetic process	0.00128	0.6	dependent GO term
macromolecule catabolic process	0.00129	0.5	dependent GO term
regulation of norepinephrine secretion	0.00129	1	dependent GO term
vascular smooth muscle contraction	0.00129	0.666667	dependent GO term
substrate-dependent cell migration	0.00129	0	dependent GO term
regulation of cGMP biosynthetic process	0.00129	0	dependent GO term
inactivation of MAPK activity	0.00129	0.666667	dependent GO term
T cell costimulation	0.00129	1	dependent GO term
notochord development	0.00129	0	dependent GO term
membrane repolarization	0.00129	0.666667	dependent GO term
regulation of membrane repolarization	0.00129	0.666667	dependent GO term
fibrinolysis	0.00129	0.666667	dependent GO term
vesicle targeting	0.00129	0	independent GO term
negative regulation of cellular response to insulin stimulus	0.00129	1	dependent GO term
sister chromatid cohesion	0.00129	0	dependent GO term
sodium ion homeostasis	0.00129	1	dependent GO term
blastocyst formation	0.00129	0.5	dependent GO term
positive regulation of chemokine production	0.00129	0.5	dependent GO term
T-helper 1 type immune response	0.00129	0.5	dependent GO term
ATP hydrolysis coupled proton transport	0.00129	0	dependent GO term
NAD metabolic process	0.00129	0	dependent GO term
positive regulation of multicellular organism growth	0.00129	1	dependent GO term
commissural neuron axon guidance	0.0013	0.285714	dependent GO term
regulation of leukocyte migration	0.0013	0.4	dependent GO term
histone mRNA catabolic process	0.00131	0	dependent GO term
regulation of fibrinolysis	0.00131	0.6	independent GO term
regulation of N-methyl-D-aspartate selective glutamate receptor activity	0.00131	0.25	dependent GO term
response to defenses of other organism involved in symbiotic interaction	0.00131	0.75	dependent GO term
response to host	0.00131	0.75	dependent GO term
response to host defenses	0.00131	0.75	dependent GO term
RNA-dependent DNA replication	0.00131	0.5	dependent GO term
positive regulation of mRNA 3'-end processing	0.00131	0.5	dependent GO term
regulation of ventricular cardiac muscle cell membrane repolarization	0.00131	0.75	dependent GO term
maturation of 5.8S rRNA	0.00131	0	dependent GO term
JNK cascade	0.00132	0.4	dependent GO term
protein folding	0.00132	0.25	dependent GO term
positive regulation of cellular protein metabolic process	0.00132	1	dependent GO term
JNK cascade	0.00132	0.25	dependent GO term
nucleotide-excision repair	0.00133	0.555556	dependent GO term
regulation of excitatory postsynaptic membrane potential	0.00133	0.444444	dependent GO term
transcription from RNA polymerase II promoter	0.00133	0	dependent GO term
positive regulation of behavior	0.00134	0.4	dependent GO term
DNA recombination	0.00134	0	dependent GO term
mRNA processing	0.00135	0	dependent GO term
mRNA processing	0.00135	0	dependent GO term
protein homooligomerization	0.00135	0.333333	dependent GO term
protein localization to chromatin	0.00136	0	dependent GO term
negative regulation of glutamate secretion	0.00136	1	dependent GO term
synaptic vesicle priming	0.00136	0.2	dependent GO term
positive regulation of T cell mediated immunity	0.00137	0.857143	dependent GO term
regionalization	0.00137	0.333333	dependent GO term
negative regulation of gene expression, epigenetic	0.00137	0	dependent GO term
cellular aldehyde metabolic process	0.00137	1	dependent GO term
energy coupled proton transmembrane transport, against electrochemical gradient	0.00137	0	dependent GO term
one-carbon metabolic process	0.00137	1	dependent GO term
insulin secretion involved in cellular response to glucose stimulus	0.00137	0.5	dependent GO term
regulation of insulin secretion involved in cellular response to glucose stimulus	0.00137	0.5	dependent GO term
T cell homeostasis	0.00137	0.5	dependent GO term
microtubule anchoring	0.00137	0.5	dependent GO term
insulin secretion involved in cellular response to glucose stimulus	0.00137	0.5	dependent GO term
regulation of insulin secretion involved in cellular response to glucose stimulus	0.00137	0.5	dependent GO term
regulation of vesicle-mediated transport	0.00138	0.666667	dependent GO term
protein modification by small protein conjugation	0.00139	0.2	dependent GO term
protein modification by small protein conjugation	0.00139	0	dependent GO term
response to organic cyclic compound	0.00142	1	independent GO term
regulation of G-protein coupled receptor protein signaling pathway	0.00142	0.2	dependent GO term
protein localization	0.00143	0.428571	dependent GO term
cellular response to biotic stimulus	0.00143	0.75	dependent GO term
regulation of lymphocyte activation	0.00143	1	dependent GO term
regulation of lymphocyte activation	0.00143	1	dependent GO term
positive regulation of cellular process	0.00144	0.6	dependent GO term
norepinephrine secretion	0.00145	1	dependent GO term
regulation of T-helper 1 type immune response	0.00145	1	dependent GO term
regulation of defense response to virus by host	0.00145	1	dependent GO term
retinal ganglion cell axon guidance	0.00145	0	dependent GO term
lymphocyte costimulation	0.00145	1	dependent GO term
cell-cell adhesion mediated by integrin	0.00145	1	dependent GO term
vesicle coating	0.00145	0	dependent GO term
response to interferon-beta	0.00145	0	independent GO term
positive regulation of MAP kinase activity	0.00146	0.25	dependent GO term
positive regulation of muscle contraction	0.00146	0.333333	dependent GO term
protein sumoylation	0.00146	0	dependent GO term
endocrine pancreas development	0.00146	1	dependent GO term
cation transport	0.00149	0.4	dependent GO term
regulation of body fluid levels	0.0015	0.666667	dependent GO term
regulation of protein modification process	0.00151	0.571429	dependent GO term
regulation of nuclear division	0.00151	0.285714	dependent GO term
regulation of mitosis	0.00151	0.285714	dependent GO term
regulation of transmembrane receptor protein serine/threonine kinase signaling pathway	0.00152	0.75	dependent GO term
glial cell differentiation	0.00152	1	dependent GO term
forebrain development	0.00153	1	dependent GO term
positive regulation of leukocyte mediated cytotoxicity	0.00156	0.857143	dependent GO term
chromosome organization involved in meiosis	0.00156	0	dependent GO term
cellular developmental process	0.00157	0.393939	dependent GO term
ubiquitin-dependent protein catabolic process	0.00157	0.105263	dependent GO term
positive regulation of excitatory postsynaptic membrane potential	0.00157	0.25	dependent GO term
chromatin disassembly	0.00157	0.25	dependent GO term
protein-DNA complex disassembly	0.00157	0.25	dependent GO term
nucleosome disassembly	0.00157	0.25	dependent GO term
telomere maintenance via telomere lengthening	0.00157	0.5	dependent GO term
clathrin coat assembly	0.00157	0	dependent GO term
alcohol metabolic process	0.00157	0.666667	dependent GO term
protein acylation	0.00158	0	dependent GO term
protein acylation	0.00158	0.25	dependent GO term
positive regulation of cell migration	0.00159	1	dependent GO term
grooming behavior	0.00162	1	dependent GO term
positive regulation of secretion	0.00162	1	dependent GO term
positive regulation of activated T cell proliferation	0.00162	1	dependent GO term
myoblast fusion	0.00162	1	dependent GO term
arachidonic acid secretion	0.00162	1	dependent GO term
positive regulation of secretion	0.00162	0.666667	dependent GO term
macromolecular complex remodeling	0.00162	1	dependent GO term
protein-lipid complex remodeling	0.00162	1	dependent GO term
plasma lipoprotein particle remodeling	0.00162	1	dependent GO term
myoblast fusion	0.00162	0	dependent GO term
regulation of alpha-beta T cell proliferation	0.00162	1	dependent GO term
neuromuscular synaptic transmission	0.00162	0.333333	dependent GO term
regulation of RNA metabolic process	0.00164	0.6	dependent GO term
G-protein coupled receptor signaling pathway, coupled to cyclic nucleotide second messenger	0.00164	0.666667	dependent GO term
induction of programmed cell death	0.00164	0.5	dependent GO term
positive regulation of tumor necrosis factor production	0.00165	0.666667	dependent GO term
base-excision repair	0.00165	1	dependent GO term
dendritic spine development	0.00165	0	dependent GO term
regulation of chondrocyte differentiation	0.00165	0.5	dependent GO term
regulation of sensory perception	0.00165	1	dependent GO term
regulation of sensory perception of pain	0.00165	1	dependent GO term
dendritic spine development	0.00165	0.5	dependent GO term
stem cell differentiation	0.00166	0.333333	dependent GO term
positive regulation of cell motility	0.00166	1	dependent GO term
regulation of protein phosphorylation	0.00167	1	dependent GO term
regulation of cytoskeleton organization	0.00168	0	dependent GO term
Rho protein signal transduction	0.00169	0.333333	dependent GO term
double-strand break repair	0.00169	0.2	dependent GO term
double-strand break repair	0.00169	0.6	dependent GO term
nitrogen compound metabolic process	0.00172	0.0833333	dependent GO term
regulation of neuron projection development	0.00172	0	dependent GO term
regulation of cell adhesion	0.00172	1	dependent GO term
nucleotide biosynthetic process	0.00172	0	dependent GO term
modification-dependent protein catabolic process	0.00174	0.105263	dependent GO term
organelle inheritance	0.00174	0.428571	dependent GO term
Golgi inheritance	0.00174	0.428571	dependent GO term
regulation of transcription from RNA polymerase II promoter in response to hypoxia	0.00174	0.333333	dependent GO term
4-hydroxyproline metabolic process	0.00174	0.333333	dependent GO term
gas homeostasis	0.00174	0.333333	dependent GO term
eosinophil chemotaxis	0.00174	0.4	dependent GO term
regulation of cAMP-dependent protein kinase activity	0.00174	0.2	dependent GO term
ossification involved in bone maturation	0.00174	0.2	dependent GO term
regulation of transmission of nerve impulse	0.00174	1	dependent GO term
cyclic nucleotide metabolic process	0.00174	1	dependent GO term
diencephalon development	0.00175	0.285714	dependent GO term
regulation of stress fiber assembly	0.00175	0.5	dependent GO term
porphyrin-containing compound metabolic process	0.00175	0	dependent GO term
centrosome cycle	0.00175	0	dependent GO term
humoral immune response mediated by circulating immunoglobulin	0.00175	0.5	dependent GO term
protein targeting to mitochondrion	0.00175	0.5	dependent GO term
cAMP-mediated signaling	0.00175	1	dependent GO term
organic acid biosynthetic process	0.00176	0	dependent GO term
carboxylic acid biosynthetic process	0.00176	0	dependent GO term
nucleoside phosphate biosynthetic process	0.00176	0	dependent GO term
negative regulation of heart contraction	0.0018	0.75	dependent GO term
positive regulation of interleukin-8 production	0.0018	0.75	dependent GO term
mating behavior	0.0018	1	dependent GO term
modulation of growth of symbiont involved in interaction with host	0.0018	0.666667	dependent GO term
regulation of growth of symbiont in host	0.0018	0.666667	dependent GO term
negative regulation of growth of symbiont involved in interaction with host	0.0018	0.666667	dependent GO term
negative regulation of growth of symbiont in host	0.0018	0.666667	dependent GO term
neuron projection extension involved in neuron projection guidance	0.0018	0	dependent GO term
axon extension involved in axon guidance	0.0018	0	dependent GO term
positive regulation of NF-kappaB import into nucleus	0.0018	0.333333	dependent GO term
positive regulation of cyclin-dependent protein kinase activity	0.0018	0.333333	dependent GO term
positive regulation of cellular component movement	0.0018	1	dependent GO term
chondroitin sulfate metabolic process	0.0018	0.333333	dependent GO term
synaptic transmission, cholinergic	0.0018	0.333333	dependent GO term
anterograde axon cargo transport	0.0018	1	dependent GO term
macromolecule localization	0.00181	0	independent GO term
neuropeptide signaling pathway	0.00181	1	dependent GO term
modification-dependent macromolecule catabolic process	0.00183	0.105263	dependent GO term
regulation of chemotaxis	0.00183	0.4	dependent GO term
regulation of axonogenesis	0.00183	0.2	dependent GO term
cellular response to hormone stimulus	0.00185	1	dependent GO term
posttranscriptional regulation of gene expression	0.00185	0.166667	dependent GO term
adenylate cyclase-inhibiting G-protein coupled receptor signaling pathway	0.00185	0.75	dependent GO term
respiratory electron transport chain	0.00185	0.333333	dependent GO term
regulation of release of sequestered calcium ion into cytosol	0.00185	0.5	dependent GO term
regulation of endocrine process	0.00185	0.5	dependent GO term
response to food	0.00185	0.5	dependent GO term
positive regulation of protein oligomerization	0.00186	0.666667	dependent GO term
gamma-aminobutyric acid secretion	0.00186	0.4	dependent GO term
regulation of lymphocyte chemotaxis	0.00186	0.4	dependent GO term
negative regulation by host of viral transcription	0.00186	0.4	dependent GO term
regulation of T cell cytokine production	0.00186	0.4	dependent GO term
positive regulation of interleukin-2 production	0.00186	0.4	dependent GO term
microglial cell activation	0.00186	0.75	dependent GO term
detection of bacterium	0.00186	0.75	dependent GO term
regulation of mRNA 3'-end processing	0.00186	0.5	dependent GO term
positive regulation of DNA damage response, signal transduction by p53 class mediator	0.00186	0	dependent GO term
spindle assembly involved in mitosis	0.00186	0.25	dependent GO term
positive regulation of locomotion	0.00186	1	dependent GO term
single organism reproductive process	0.00187	0.25	dependent GO term
neuron development	0.00187	1	dependent GO term
negative regulation of sequence-specific DNA binding transcription factor activity	0.00188	0	dependent GO term
G1/S transition of mitotic cell cycle	0.00188	0.2	dependent GO term
regulation of endopeptidase activity	0.0019	0.5	dependent GO term
transmembrane receptor protein tyrosine kinase signaling pathway	0.00193	0.5	dependent GO term
transmembrane receptor protein tyrosine kinase signaling pathway	0.00193	0.285714	dependent GO term
determination of bilateral symmetry	0.00194	0.333333	dependent GO term
cerebellum development	0.00194	1	dependent GO term
peptidyl-lysine modification	0.00194	0.25	dependent GO term
regulation of leukocyte mediated cytotoxicity	0.00195	0.857143	dependent GO term
regulation of vasodilation	0.00195	0.75	dependent GO term
complement activation	0.00195	0.666667	dependent GO term
complement activation	0.00195	0	dependent GO term
potassium ion transmembrane transport	0.00195	1	dependent GO term
regulation of insulin receptor signaling pathway	0.00195	1	dependent GO term
complement activation	0.00195	0.5	dependent GO term
cerebral cortex cell migration	0.00195	0.5	dependent GO term
substrate adhesion-dependent cell spreading	0.00195	0.5	dependent GO term
T cell apoptotic process	0.00195	0.5	dependent GO term
complement activation	0.00195	0.5	dependent GO term
response to abiotic stimulus	0.00196	0.333333	independent GO term
regulation of postsynaptic membrane potential	0.00198	0.444444	dependent GO term
regulation of apoptotic signaling pathway	0.00198	0.666667	dependent GO term
regulation of apoptotic signaling pathway	0.00198	0.666667	dependent GO term
embryonic organ morphogenesis	0.00198	0	dependent GO term
renal sodium excretion	0.00199	1	dependent GO term
norepinephrine transport	0.00199	1	dependent GO term
regulation of renal sodium excretion	0.00199	1	dependent GO term
disruption of cells of other organism	0.00199	0.666667	dependent GO term
killing of cells of other organism	0.00199	0.666667	dependent GO term
chemokine-mediated signaling pathway	0.00199	0	dependent GO term
negative regulation of cytokine-mediated signaling pathway	0.00199	0	dependent GO term
acylglycerol homeostasis	0.00199	1	dependent GO term
triglyceride homeostasis	0.00199	1	dependent GO term
chemokine-mediated signaling pathway	0.00199	1	dependent GO term
protein localization to endoplasmic reticulum	0.00199	0.333333	dependent GO term
positive regulation of Notch signaling pathway	0.00199	0.666667	dependent GO term
proteasomal protein catabolic process	0.002	0.105263	dependent GO term
positive regulation of developmental process	0.002	1	dependent GO term
specification of symmetry	0.00201	0.333333	dependent GO term
developmental process	0.00204	0.393939	independent GO term
organic substance transport	0.00204	0	independent GO term
regulation of protein phosphorylation	0.00204	0.75	dependent GO term
stress-activated MAPK cascade	0.00205	0.4	dependent GO term
stress-activated MAPK cascade	0.00205	0.25	dependent GO term
leukocyte degranulation	0.00205	0.5	dependent GO term
cellular potassium ion transport	0.00205	1	dependent GO term
mitotic sister chromatid segregation	0.00205	0	dependent GO term
regulation of blood vessel endothelial cell migration	0.00205	1	dependent GO term
ARF protein signal transduction	0.00205	0	dependent GO term
regulation of ARF protein signal transduction	0.00205	0	dependent GO term
regulation of interleukin-12 production	0.00205	0.5	dependent GO term
cellular calcium ion homeostasis	0.00206	1	dependent GO term
DNA metabolic process	0.00208	0	dependent GO term
DNA metabolic process	0.00208	0	dependent GO term
DNA metabolic process	0.00208	0.25	dependent GO term
fatty acid metabolic process	0.00211	1	dependent GO term
vesicle-mediated transport	0.00212	0.4	independent GO term
positive regulation of protein metabolic process	0.00213	1	dependent GO term
monovalent inorganic cation transport	0.00213	0.666667	dependent GO term
cellular response to alcohol	0.00215	1	dependent GO term
positive regulation of Ras GTPase activity	0.00215	0.666667	dependent GO term
regulation of T cell mediated immunity	0.00216	0.857143	dependent GO term
protein monoubiquitination	0.00216	0	dependent GO term
ventral spinal cord development	0.00216	0.5	dependent GO term
positive regulation of endothelial cell migration	0.00216	1	dependent GO term
vascular endothelial growth factor receptor signaling pathway	0.00216	1	dependent GO term
retinoid metabolic process	0.00216	1	dependent GO term
retina morphogenesis in camera-type eye	0.00216	1	dependent GO term
aerobic respiration	0.00216	0	dependent GO term
natural killer cell activation	0.00216	0.5	dependent GO term
macrophage activation	0.00216	0.5	dependent GO term
hormone-mediated signaling pathway	0.00216	0.5	dependent GO term
endocrine hormone secretion	0.00216	0.5	dependent GO term
regulation of catecholamine secretion	0.00216	0.5	dependent GO term
aerobic respiration	0.00216	0	dependent GO term
establishment of protein localization to mitochondrion	0.00216	0.5	dependent GO term
natural killer cell activation	0.00216	1	dependent GO term
gamma-aminobutyric acid transport	0.00217	0.4	dependent GO term
activation of NF-kappaB-inducing kinase activity	0.00217	0.2	dependent GO term
activation of NF-kappaB-inducing kinase activity	0.00217	0.4	dependent GO term
macrophage activation involved in immune response	0.00217	0.75	dependent GO term
regulation of telomere maintenance	0.00217	0.5	dependent GO term
regulation of ventricular cardiac muscle cell action potential	0.00217	0.75	dependent GO term
positive regulation of cytokinesis	0.00217	0.25	dependent GO term
maturation of SSU-rRNA from tricistronic rRNA transcript (SSU-rRNA, 5.8S rRNA, LSU-rRNA)	0.00217	0	dependent GO term
cellular response to growth factor stimulus	0.00218	0.5	dependent GO term
cellular response to growth factor stimulus	0.00218	0.285714	dependent GO term
metanephric glomerulus vasculature development	0.00218	0.6	dependent GO term
maintenance of fidelity involved in DNA-dependent DNA replication	0.00218	0.6	dependent GO term
bone maturation	0.00218	0.2	dependent GO term
bone trabecula morphogenesis	0.00218	0.2	dependent GO term
regulation of vascular endothelial growth factor receptor signaling pathway	0.00219	1	dependent GO term
regulation of vascular endothelial growth factor receptor signaling pathway	0.00219	0.666667	dependent GO term
glomerulus vasculature development	0.00219	1	dependent GO term
positive regulation of tyrosine phosphorylation of Stat3 protein	0.00219	0.666667	dependent GO term
regulation of myotube differentiation	0.00219	0	dependent GO term
stress-activated protein kinase signaling cascade	0.0022	0.4	dependent GO term
stress-activated protein kinase signaling cascade	0.0022	0.25	dependent GO term
synaptic transmission	0.00222	0.2	dependent GO term
positive regulation of ERK1 and ERK2 cascade	0.00223	0.285714	dependent GO term
positive regulation of ERK1 and ERK2 cascade	0.00223	0.5	dependent GO term
central nervous system development	0.00224	1	dependent GO term
antigen processing and presentation of peptide antigen	0.00227	0.857143	dependent GO term
regulation of peptidase activity	0.00227	0.5	dependent GO term
T cell activation	0.00227	1	dependent GO term
response to dsRNA	0.00227	0	dependent GO term
T cell activation	0.00227	1	dependent GO term
regulation of cation channel activity	0.00227	0.5	dependent GO term
sister chromatid segregation	0.00227	0	dependent GO term
regulation of interleukin-2 production	0.00227	1	dependent GO term
patterning of blood vessels	0.00227	1	dependent GO term
platelet-derived growth factor receptor signaling pathway	0.00227	1	dependent GO term
interleukin-12 production	0.00227	0.5	dependent GO term
RNA export from nucleus	0.00227	0	dependent GO term
calcium ion import	0.00227	0.5	dependent GO term
protein localization to mitochondrion	0.00227	0.5	dependent GO term
Rac protein signal transduction	0.00227	0.5	dependent GO term
RNA export from nucleus	0.00227	0	dependent GO term
RNA export from nucleus	0.00227	0.5	dependent GO term
activation of protein kinase activity	0.00228	0.25	dependent GO term
regulation of neurological system process	0.00229	1	dependent GO term
RNA biosynthetic process	0.00231	0.6	dependent GO term
regulation of leukocyte activation	0.00231	1	dependent GO term
regulation of leukocyte activation	0.00231	1	dependent GO term
neuroendocrine cell differentiation	0.00233	0.285714	dependent GO term
negative regulation of thymocyte apoptotic process	0.00233	0.333333	dependent GO term
positive regulation of actin cytoskeleton reorganization	0.00233	0.666667	dependent GO term
calcium ion homeostasis	0.00234	1	dependent GO term
cell cycle process	0.00234	0	independent GO term
wound healing	0.00236	0.666667	dependent GO term
negative regulation of RNA metabolic process	0.00238	0.0833333	dependent GO term
phospholipase C-activating G-protein coupled receptor signaling pathway	0.00238	0.555556	dependent GO term
DNA repair	0.00238	0.333333	dependent GO term
DNA repair	0.00238	0	dependent GO term
cellular response to cAMP	0.00239	0.666667	dependent GO term
positive regulation of myeloid leukocyte differentiation	0.00239	1	dependent GO term
mast cell activation	0.00239	0.5	dependent GO term
positive regulation of gliogenesis	0.00239	0.5	dependent GO term
adenylate cyclase-activating G-protein coupled receptor signaling pathway	0.00239	0	dependent GO term
negative regulation of peptide hormone secretion	0.00239	0.5	dependent GO term
telomere maintenance	0.00239	0	dependent GO term
ventricular cardiac muscle tissue morphogenesis	0.00239	0.5	dependent GO term
adenylate cyclase-activating G-protein coupled receptor signaling pathway	0.00239	1	dependent GO term
protein catabolic process	0.0024	0.2	dependent GO term
regulation of phosphorylation	0.0024	1	dependent GO term
synaptic vesicle endocytosis	0.0024	0.5	dependent GO term
renal system vasculature development	0.0024	1	dependent GO term
kidney vasculature development	0.0024	1	dependent GO term
regulation of cGMP metabolic process	0.0024	0	dependent GO term
alpha-beta T cell proliferation	0.0024	1	dependent GO term
antigen processing and presentation of peptide antigen via MHC class I	0.0024	1	dependent GO term
regulation of protein export from nucleus	0.0024	0.333333	dependent GO term
mRNA metabolic process	0.00241	0	dependent GO term
mRNA metabolic process	0.00241	0	dependent GO term
regulation of JNK cascade	0.00243	0.333333	dependent GO term
leukocyte chemotaxis	0.00243	0.4	dependent GO term
protein modification by small protein conjugation or removal	0.00244	0.2	dependent GO term
protein modification by small protein conjugation or removal	0.00244	0	dependent GO term
cellular divalent inorganic cation homeostasis	0.00246	1	dependent GO term
response to hypoxia	0.00248	1	dependent GO term
response to hypoxia	0.00248	1	dependent GO term
positive regulation of cell killing	0.0025	0.857143	dependent GO term
ER to Golgi vesicle-mediated transport	0.0025	0	dependent GO term
protein activation cascade	0.0025	0.666667	dependent GO term
regulation of actin filament bundle assembly	0.0025	0.5	dependent GO term
protein activation cascade	0.0025	0	dependent GO term
positive regulation of exocytosis	0.0025	0.5	dependent GO term
ER to Golgi vesicle-mediated transport	0.0025	0	dependent GO term
tetrapyrrole metabolic process	0.0025	0	dependent GO term
regulation of cardiac muscle contraction	0.0025	0.5	dependent GO term
protein activation cascade	0.0025	0.5	dependent GO term
ER to Golgi vesicle-mediated transport	0.0025	0	dependent GO term
negative regulation of peptide secretion	0.0025	0.5	dependent GO term
ER to Golgi vesicle-mediated transport	0.0025	0	dependent GO term
telomere organization	0.0025	0	dependent GO term
actin-mediated cell contraction	0.0025	0.5	dependent GO term
actin-mediated cell contraction	0.0025	0.5	dependent GO term
regulation of cardiac muscle contraction	0.0025	0.5	dependent GO term
protein activation cascade	0.0025	0.5	dependent GO term
negative regulation of viral transcription	0.00251	0.4	dependent GO term
plasminogen activation	0.00251	0.6	dependent GO term
postsynaptic membrane organization	0.00251	0.25	independent GO term
ATP-dependent chromatin remodeling	0.00251	0.25	dependent GO term
leukotriene biosynthetic process	0.00251	0.5	dependent GO term
positive regulation of signal transduction by p53 class mediator	0.00251	0	dependent GO term
maturation of SSU-rRNA	0.00251	0	dependent GO term
cellular catabolic process	0.00253	0	dependent GO term
cellular catabolic process	0.00253	0	dependent GO term
nucleocytoplasmic transport	0.00253	0.333333	dependent GO term
regulation of cell morphogenesis	0.00253	0.333333	dependent GO term
regulation of cell morphogenesis	0.00253	0	dependent GO term
response to starvation	0.00255	0	dependent GO term
response to decreased oxygen levels	0.00255	1	dependent GO term
response to decreased oxygen levels	0.00255	1	dependent GO term
regulation of membrane potential	0.00255	0.333333	dependent GO term
negative regulation of cellular protein metabolic process	0.00256	0.571429	dependent GO term
positive regulation of cell projection organization	0.00257	1	dependent GO term
response to lipopolysaccharide	0.00258	1	dependent GO term
signal release	0.00258	0.666667	dependent GO term
response to lipopolysaccharide	0.00258	1	dependent GO term
epithelial tube morphogenesis	0.00258	0	dependent GO term
actin filament bundle assembly	0.00262	0.375	dependent GO term
regulation of excretion	0.00262	1	dependent GO term
positive regulation of nervous system development	0.00262	1	dependent GO term
positive regulation of synapse assembly	0.00262	1	dependent GO term
gene silencing by RNA	0.00262	0	dependent GO term
regulation of viral genome replication	0.00262	0	dependent GO term
thyroid gland development	0.00262	0.333333	dependent GO term
cell migration involved in sprouting angiogenesis	0.00262	0	dependent GO term
regulation of DNA-dependent DNA replication	0.00262	0	dependent GO term
regulation of astrocyte differentiation	0.00262	0.666667	dependent GO term
negative regulation of microtubule depolymerization	0.00262	0	dependent GO term
phototransduction	0.00262	0	dependent GO term
regulation of osteoclast differentiation	0.00262	1	dependent GO term
chronic inflammatory response	0.00262	1	dependent GO term
heart valve morphogenesis	0.00262	0.666667	dependent GO term
chondroitin sulfate proteoglycan metabolic process	0.00262	0.333333	dependent GO term
glutathione metabolic process	0.00262	1	dependent GO term
membrane budding	0.00262	0	dependent GO term
tRNA aminoacylation for protein translation	0.00262	0	dependent GO term
catecholamine secretion	0.00262	0.5	dependent GO term
regulation of circadian rhythm	0.00262	0.5	independent GO term
cellular protein complex assembly	0.00263	0	dependent GO term
tissue development	0.00264	0.2	dependent GO term
intracellular transport	0.00265	0	dependent GO term
establishment of localization in cell	0.00266	0.428571	independent GO term
nuclear transport	0.00268	0.333333	dependent GO term
anatomical structure homeostasis	0.00268	0.333333	dependent GO term
skeletal system development	0.00273	0.5	dependent GO term
skeletal system development	0.00273	0.666667	dependent GO term
positive regulation of interleukin-12 biosynthetic process	0.00274	0.714286	dependent GO term
chromosome segregation	0.00274	0.6	independent GO term
stress fiber assembly	0.00274	0.5	dependent GO term
cyclic-nucleotide-mediated signaling	0.00274	1	dependent GO term
vesicle-mediated transport	0.00275	0.428571	independent GO term
vocalization behavior	0.00279	0.444444	dependent GO term
developmental growth	0.00279	0	dependent GO term
divalent inorganic cation homeostasis	0.00281	1	dependent GO term
leukocyte migration	0.00283	0.4	dependent GO term
positive regulation of smooth muscle contraction	0.00285	1	dependent GO term
hyperosmotic response	0.00285	1	dependent GO term
positive regulation of cellular component biogenesis	0.00285	1	dependent GO term
syncytium formation by plasma membrane fusion	0.00285	1	dependent GO term
growth involved in symbiotic interaction	0.00285	0.666667	dependent GO term
growth of symbiont involved in interaction with host	0.00285	0.666667	dependent GO term
growth of symbiont in host	0.00285	0.666667	dependent GO term
motor neuron axon guidance	0.00285	0	dependent GO term
positive regulation of pathway-restricted SMAD protein phosphorylation	0.00285	0.666667	dependent GO term
syncytium formation by plasma membrane fusion	0.00285	0	dependent GO term
monocyte chemotaxis	0.00285	1	dependent GO term
heat generation	0.00285	1	dependent GO term
protein phosphorylation	0.00286	0.571429	dependent GO term
protein phosphorylation	0.00286	0.166667	dependent GO term
histone mRNA metabolic process	0.00286	0	dependent GO term
positive regulation of lymphocyte migration	0.00286	0.4	dependent GO term
T cell cytokine production	0.00286	0.4	dependent GO term
MyD88-dependent toll-like receptor signaling pathway	0.00286	0.75	dependent GO term
regulation of potassium ion transmembrane transport	0.00286	0.75	dependent GO term
attachment of spindle microtubules to kinetochore	0.00286	0.25	dependent GO term
response to molecule of bacterial origin	0.00287	1	dependent GO term
superoxide metabolic process	0.00287	1	dependent GO term
response to molecule of bacterial origin	0.00287	1	dependent GO term
regulation of cellular response to insulin stimulus	0.00287	1	dependent GO term
excretion	0.00287	1	dependent GO term
ventricular cardiac muscle tissue development	0.00287	0.5	dependent GO term
cell migration	0.00288	0.75	dependent GO term
regulation of cell activation	0.00289	1	dependent GO term
regulation of cell activation	0.00289	1	dependent GO term
cellular macromolecule catabolic process	0.00291	0.2	dependent GO term
regulation of cysteine-type endopeptidase activity involved in apoptotic process	0.00292	0.666667	dependent GO term
lymphocyte proliferation	0.00292	0.5	dependent GO term
gliogenesis	0.00292	1	dependent GO term
cellular response to cytokine stimulus	0.00292	1	dependent GO term
regulation of cysteine-type endopeptidase activity involved in apoptotic process	0.00292	0.75	dependent GO term
cellular response to cytokine stimulus	0.00292	0	dependent GO term
regulation of RNA biosynthetic process	0.00294	0.166667	dependent GO term
cellular response to nutrient levels	0.00294	0	dependent GO term
platelet degranulation	0.00296	0.625	dependent GO term
Fc receptor mediated stimulatory signaling pathway	0.00296	0.625	dependent GO term
metencephalon development	0.00296	1	dependent GO term
mononuclear cell proliferation	0.00297	0.5	dependent GO term
lung saccule development	0.00299	0.285714	dependent GO term
forebrain neuroblast division	0.00299	0.5	dependent GO term
peptidyl-proline hydroxylation	0.00299	0.333333	dependent GO term
regulation of cell killing	0.003	0.857143	independent GO term
viral genome replication	0.003	0	dependent GO term
regulation of anatomical structure size	0.003	1	dependent GO term
regulation of cell projection organization	0.003	0	dependent GO term
regulation of anatomical structure size	0.003	0	dependent GO term
regulation of cell projection organization	0.003	0	dependent GO term
regulated secretory pathway	0.003	0.5	dependent GO term
homotypic cell-cell adhesion	0.003	1	dependent GO term
regulation of cartilage development	0.003	0.5	dependent GO term
interleukin-2 production	0.003	1	dependent GO term
pituitary gland development	0.003	1	dependent GO term
tube morphogenesis	0.00306	0	dependent GO term
regulation of digestive system process	0.00309	1	dependent GO term
regulation of activated T cell proliferation	0.00309	1	dependent GO term
negative regulation of response to cytokine stimulus	0.00309	0	dependent GO term
regulation of endothelial cell apoptotic process	0.00309	1	dependent GO term
positive regulation of cyclase activity	0.00309	0	dependent GO term
response to sterol	0.00309	1	dependent GO term
response to cholesterol	0.00309	1	dependent GO term
heart valve development	0.00309	0.666667	dependent GO term
regulation of cardiac muscle cell action potential	0.00309	0.666667	dependent GO term
L-amino acid transport	0.00313	0	dependent GO term
regulation of smooth muscle contraction	0.00313	0.333333	dependent GO term
histone deacetylation	0.00313	1	dependent GO term
regulation of protein tyrosine kinase activity	0.00313	0.5	dependent GO term
amino acid activation	0.00313	0	dependent GO term
tRNA aminoacylation	0.00313	0	dependent GO term
nucleic acid metabolic process	0.00315	0.6	dependent GO term
regulation of anatomical structure size	0.00317	0.166667	dependent GO term
response to oxygen levels	0.00317	1	dependent GO term
response to oxygen levels	0.00317	1	dependent GO term
response to lipid	0.00319	1	independent GO term
regulation of phosphorylation	0.0032	0.75	dependent GO term
regulation of heterotypic cell-cell adhesion	0.0032	1	dependent GO term
negative regulation of amino acid transport	0.0032	1	dependent GO term
regulation of cell-cell adhesion involved in gastrulation	0.0032	1	dependent GO term
chromatin disassembly	0.0032	0.4	dependent GO term
protein-DNA complex disassembly	0.0032	0.4	dependent GO term
nucleosome disassembly	0.0032	0.4	dependent GO term
phosphatidylinositol-3-phosphate biosynthetic process	0.0032	0.6	dependent GO term
eosinophil migration	0.0032	0.4	dependent GO term
positive regulation of protein serine/threonine kinase activity	0.00321	0.25	dependent GO term
membrane repolarization	0.00324	0.75	dependent GO term
regulation of membrane repolarization	0.00324	0.75	dependent GO term
positive regulation of RNA metabolic process	0.00325	0.333333	dependent GO term
forebrain development	0.00326	0	dependent GO term
establishment of protein localization to plasma membrane	0.00326	0	dependent GO term
establishment of protein localization to plasma membrane	0.00326	0.5	dependent GO term
cell differentiation in spinal cord	0.00326	0.5	dependent GO term
regulation of translational initiation	0.00326	1	dependent GO term
forebrain neuron differentiation	0.00326	0	dependent GO term
telencephalon cell migration	0.00326	0.5	dependent GO term
regulation of chemokine production	0.00326	0.5	dependent GO term
positive regulation of chromosome organization	0.00326	0	dependent GO term
negative regulation of response to stimulus	0.00328	0.2	dependent GO term
small GTPase mediated signal transduction	0.00328	0.4	dependent GO term
small GTPase mediated signal transduction	0.00328	0.2	dependent GO term
glutamate receptor signaling pathway	0.00332	0.444444	dependent GO term
CD4-positive, alpha-beta T cell differentiation involved in immune response	0.00333	1	dependent GO term
T-helper cell differentiation	0.00333	1	dependent GO term
syncytium formation	0.00333	1	dependent GO term
ephrin receptor signaling pathway	0.00333	0.333333	dependent GO term
RNA stabilization	0.00333	0.333333	dependent GO term
mRNA stabilization	0.00333	0.333333	dependent GO term
regulation of tyrosine phosphorylation of Stat3 protein	0.00333	0.666667	dependent GO term
regulation of microtubule depolymerization	0.00333	0	dependent GO term
plasma lipoprotein particle organization	0.00333	1	dependent GO term
phospholipid transport	0.00333	1	dependent GO term
syncytium formation	0.00333	0	dependent GO term
regulation of myeloid cell apoptotic process	0.00333	1	dependent GO term
regulation of actin filament depolymerization	0.00333	0.333333	dependent GO term
regulation of cardiac muscle cell membrane potential	0.00333	0.666667	dependent GO term
peptide cross-linking	0.00333	0.333333	dependent GO term
regulation of fatty acid biosynthetic process	0.00333	0.666667	dependent GO term
leukocyte proliferation	0.00336	0.5	dependent GO term
myeloid leukocyte mediated immunity	0.0034	0.5	dependent GO term
diterpenoid metabolic process	0.0034	1	dependent GO term
nucleic acid metabolic process	0.00341	0.6	dependent GO term
macromolecule localization	0.00341	0.428571	independent GO term
regulation of cysteine-type endopeptidase activity	0.00341	0.666667	dependent GO term
regulation of cysteine-type endopeptidase activity	0.00341	0.75	dependent GO term
locomotion	0.00345	0.666667	independent GO term
regulation of RNA metabolic process	0.00349	0.166667	dependent GO term
angiogenesis	0.0035	1	dependent GO term
response to mechanical stimulus	0.00352	1	dependent GO term
regulation of glial cell differentiation	0.00353	0.5	dependent GO term
neural crest cell development	0.00353	1	dependent GO term
acid secretion	0.00353	1	dependent GO term
negative regulation of cellular macromolecule biosynthetic process	0.00359	0.0833333	dependent GO term
retinoic acid receptor signaling pathway	0.00359	0.666667	dependent GO term
nuclear-transcribed mRNA catabolic process, nonsense-mediated decay	0.00359	0	dependent GO term
positive regulation of lyase activity	0.00359	0	dependent GO term
protein-lipid complex subunit organization	0.00359	1	dependent GO term
regulation of skeletal muscle cell differentiation	0.00359	0	dependent GO term
positive regulation of acute inflammatory response	0.00359	1	dependent GO term
cell projection organization	0.0036	1	independent GO term
RNA metabolic process	0.00362	0.416667	dependent GO term
negative regulation of gene expression	0.00363	0.0833333	dependent GO term
cardiocyte differentiation	0.00363	0.333333	dependent GO term
membrane biogenesis	0.00365	0.25	dependent GO term
regulation of alpha-amino-3-hydroxy-5-methyl-4-isoxazole propionate selective glutamate receptor activity	0.00365	0.25	dependent GO term
vesicle coating	0.00365	0	dependent GO term
regulation of heart rate by cardiac conduction	0.00365	0.75	dependent GO term
positive regulation of potassium ion transport	0.00365	0.75	dependent GO term
proteolysis involved in cellular protein catabolic process	0.00366	0.105263	dependent GO term
organic substance catabolic process	0.00366	0	dependent GO term
positive regulation of helicase activity	0.00367	0.6	dependent GO term
ATP metabolic process	0.00367	0.6	dependent GO term
regulation of Ras GTPase activity	0.00367	0.2	dependent GO term
establishment of protein localization to membrane	0.00368	0	dependent GO term
establishment of protein localization to membrane	0.00368	0.5	dependent GO term
positive regulation of insulin secretion	0.00368	1	dependent GO term
positive regulation of T cell differentiation	0.00368	1	dependent GO term
positive regulation of insulin secretion	0.00368	1	dependent GO term
regulation of striated muscle contraction	0.00368	0.5	dependent GO term
response to nicotine	0.00368	1	dependent GO term
phospholipase C-activating G-protein coupled receptor signaling pathway	0.00368	1	dependent GO term
forebrain cell migration	0.00368	0.5	dependent GO term
chemokine production	0.00368	0.5	dependent GO term
cellular modified amino acid biosynthetic process	0.00368	1	dependent GO term
regulation of striated muscle contraction	0.00368	0.5	dependent GO term
phospholipase C-activating G-protein coupled receptor signaling pathway	0.00368	1	dependent GO term
establishment of localization in cell	0.00372	0.2	independent GO term
system development	0.00373	0.6	dependent GO term
regulation of stress-activated MAPK cascade	0.00374	0.333333	dependent GO term
embryonic foregut morphogenesis	0.00374	0.333333	dependent GO term
interphase	0.00374	0.2	dependent GO term
organic substance transport	0.00378	0.428571	independent GO term
interleukin-1-mediated signaling pathway	0.00378	1	dependent GO term
cell-cell adhesion involved in gastrulation	0.00378	1	dependent GO term
regulation of lymphocyte chemotaxis	0.00378	0.4	dependent GO term
vascular endothelial growth factor signaling pathway	0.00378	0.6	dependent GO term
cardiac myofibril assembly	0.00378	0.6	dependent GO term
regulation of macromolecule metabolic process	0.00382	0.0833333	dependent GO term
regulation of stress-activated protein kinase signaling cascade	0.00382	0.333333	dependent GO term
positive regulation of hydrolase activity	0.00382	0.5	dependent GO term
regulation of protein modification process	0.00382	1	dependent GO term
organic hydroxy compound metabolic process	0.00382	0.666667	dependent GO term
muscle cell migration	0.00382	0.5	dependent GO term
T cell differentiation involved in immune response	0.00385	1	dependent GO term
alpha-beta T cell differentiation involved in immune response	0.00385	1	dependent GO term
endothelial cell apoptotic process	0.00385	1	dependent GO term
positive regulation of glial cell differentiation	0.00385	0.666667	dependent GO term
localization of cell	0.00387	0.75	independent GO term
cell motility	0.00387	0.75	dependent GO term
transmembrane receptor protein tyrosine kinase signaling pathway	0.00388	0.666667	dependent GO term
transmembrane receptor protein tyrosine kinase signaling pathway	0.00388	1	dependent GO term
transmembrane receptor protein tyrosine kinase signaling pathway	0.00388	0	dependent GO term
macromolecular complex assembly	0.00389	0.166667	dependent GO term
protein targeting to nucleus	0.0039	0.5	dependent GO term
protein import into nucleus	0.0039	0.5	dependent GO term
osteoblast differentiation	0.00391	0	dependent GO term
RNA splicing, via transesterification reactions	0.00393	0	dependent GO term
RNA splicing, via transesterification reactions with bulged adenosine as nucleophile	0.00393	0	dependent GO term
mRNA splicing, via spliceosome	0.00393	0	dependent GO term
cellular amino acid metabolic process	0.00395	0	dependent GO term
regulation of cell morphogenesis involved in differentiation	0.00396	1	dependent GO term
purine ribonucleotide biosynthetic process	0.00396	1	dependent GO term
myeloid cell activation involved in immune response	0.00397	0.5	dependent GO term
regulation of dendrite morphogenesis	0.00397	0	dependent GO term
regulation of calcium ion transport into cytosol	0.00397	0.5	dependent GO term
regulation of dendrite morphogenesis	0.00397	0.5	dependent GO term
catecholamine transport	0.00397	0.5	dependent GO term
positive regulation of DNA replication	0.00397	0	dependent GO term
lymphocyte homeostasis	0.00397	0.5	dependent GO term
cardiac muscle tissue morphogenesis	0.00397	0.5	dependent GO term
actin filament-based movement	0.00397	0.5	dependent GO term
actin filament-based movement	0.00397	0.5	dependent GO term
blood circulation	0.00398	1	dependent GO term
blood circulation	0.00398	1	dependent GO term
axonogenesis	0.00398	0	dependent GO term
JNK cascade	0.00399	0.333333	dependent GO term
regulation of MAP kinase activity	0.00401	0.25	dependent GO term
nuclear import	0.00401	0.5	dependent GO term
circulatory system process	0.00402	1	dependent GO term
circulatory system process	0.00402	1	dependent GO term
DNA recombination	0.00407	0.2	dependent GO term
lymphocyte chemotaxis	0.00408	0.4	dependent GO term
zymogen activation	0.00408	0.6	dependent GO term
positive regulation of synaptic transmission, glutamatergic	0.00408	0.25	dependent GO term
cellular response to interleukin-6	0.00408	0.5	dependent GO term
positive regulation of adenylate cyclase activity	0.00408	1	dependent GO term
positive regulation of mRNA processing	0.00408	0.5	dependent GO term
positive regulation of immune response	0.00409	0.5	dependent GO term
T cell mediated immunity	0.00412	0.857143	dependent GO term
regulation of microtubule polymerization or depolymerization	0.00412	0	dependent GO term
protein targeting to membrane	0.00412	0.5	dependent GO term
neutrophil chemotaxis	0.00412	0	dependent GO term
positive regulation of cAMP biosynthetic process	0.00412	0.5	dependent GO term
pyridine nucleotide metabolic process	0.00412	0	dependent GO term
nicotinamide nucleotide metabolic process	0.00412	0	dependent GO term
positive regulation of cAMP biosynthetic process	0.00412	1	dependent GO term
cellular macromolecule biosynthetic process	0.00413	0.6	dependent GO term
response to salt stress	0.00413	1	dependent GO term
alpha-beta T cell activation involved in immune response	0.00413	1	dependent GO term
regulation of defense response to virus	0.00413	1	dependent GO term
icosanoid secretion	0.00413	1	dependent GO term
regulation of bone resorption	0.00413	0.666667	dependent GO term
positive regulation of transcription factor import into nucleus	0.00413	0.333333	dependent GO term
tyrosine phosphorylation of Stat3 protein	0.00413	0.666667	dependent GO term
endoderm formation	0.00413	0.666667	dependent GO term
myeloid cell apoptotic process	0.00413	1	dependent GO term
regulation of myeloid cell differentiation	0.00416	0.6	dependent GO term
regulation of cytokine production	0.00419	1	independent GO term
regulation of macromolecule metabolic process	0.0042	0.6	dependent GO term
negative regulation of RNA metabolic process	0.00423	0.125	dependent GO term
cellular response to growth factor stimulus	0.00426	0.666667	dependent GO term
regulation of pH	0.00427	1	dependent GO term
positive regulation of biological process	0.00428	0.6	independent GO term
intracellular signal transduction	0.0043	0.333333	dependent GO term
negative regulation of nucleobase-containing compound metabolic process	0.00432	0.0833333	dependent GO term
purine nucleotide biosynthetic process	0.00437	1	dependent GO term
bone development	0.0044	0.5	dependent GO term
negative regulation of multicellular organismal process	0.0044	1	dependent GO term
cellular metal ion homeostasis	0.0044	1	dependent GO term
sodium ion homeostasis	0.00441	1	dependent GO term
positive regulation of organic acid transport	0.00441	1	dependent GO term
T-helper 1 type immune response	0.00441	1	dependent GO term
modification by host of symbiont morphology or physiology	0.00441	0.666667	dependent GO term
sister chromatid cohesion	0.00441	0	dependent GO term
actin filament depolymerization	0.00441	0.333333	dependent GO term
negative regulation of hemostasis	0.00441	0.666667	dependent GO term
negative regulation of blood coagulation	0.00441	0.666667	dependent GO term
cellular protein catabolic process	0.00442	0.105263	dependent GO term
hormone biosynthetic process	0.00442	1	dependent GO term
tissue regeneration	0.00442	1	dependent GO term
tRNA processing	0.00442	0	dependent GO term
platelet activation	0.00442	1	dependent GO term
forebrain generation of neurons	0.00442	0	dependent GO term
protein deacetylation	0.00442	1	dependent GO term
blood vessel endothelial cell migration	0.00442	1	dependent GO term
tRNA processing	0.00442	0	dependent GO term
negative regulation of immune response	0.00442	0.5	dependent GO term
lymphocyte apoptotic process	0.00442	0.5	dependent GO term
cell redox homeostasis	0.00442	0.5	dependent GO term
regulation of MAPK cascade	0.00443	0.285714	dependent GO term
pattern specification process	0.00443	0.333333	dependent GO term
regulation of MAPK cascade	0.00443	0.5	dependent GO term
RNA biosynthetic process	0.00443	0.166667	dependent GO term
negative regulation of protein metabolic process	0.00447	0.571429	dependent GO term
cell-cell adhesion	0.00447	0.666667	dependent GO term
regulation of protein oligomerization	0.00453	0.666667	dependent GO term
cellular extravasation	0.00453	1	dependent GO term
trophectodermal cell differentiation	0.00453	0.2	dependent GO term
negative regulation of heart contraction	0.00453	0.75	dependent GO term
positive regulation of ion transmembrane transport	0.00453	0.75	dependent GO term
foregut morphogenesis	0.00457	0.333333	dependent GO term
negative regulation of cell fate specification	0.00457	0.333333	dependent GO term
cranial suture morphogenesis	0.00457	0.5	dependent GO term
leukocyte mediated cytotoxicity	0.00458	0.857143	dependent GO term
positive regulation of lymphocyte mediated immunity	0.00458	0.857143	dependent GO term
chemotaxis	0.00458	0	dependent GO term
chemotaxis	0.00458	1	dependent GO term
chemotaxis	0.00458	1	dependent GO term
negative regulation of lipid metabolic process	0.00458	1	dependent GO term
translational initiation	0.00458	1	dependent GO term
neural crest cell differentiation	0.00458	1	dependent GO term
cellular response to glucocorticoid stimulus	0.00458	0.5	dependent GO term
regulation of neuronal synaptic plasticity	0.00458	0.5	dependent GO term
fatty acid beta-oxidation	0.00458	0.5	dependent GO term
negative regulation of macromolecule biosynthetic process	0.00459	0.0833333	dependent GO term
regulation of transmembrane receptor protein serine/threonine kinase signaling pathway	0.0046	0.2	dependent GO term
positive regulation of neurogenesis	0.0046	0.2	dependent GO term
taxis	0.00462	0	dependent GO term
taxis	0.00462	1	dependent GO term
taxis	0.00462	1	dependent GO term
regulation of cell migration	0.00463	0.666667	dependent GO term
regulation of cell migration	0.00463	0.666667	dependent GO term
ribonucleotide biosynthetic process	0.00468	1	dependent GO term
actin crosslink formation	0.00469	0.375	dependent GO term
interleukin-12 biosynthetic process	0.00469	0.714286	dependent GO term
regulation of interleukin-12 biosynthetic process	0.00469	0.714286	dependent GO term
regulation of immune response	0.00469	1	dependent GO term
regulation of cellular component biogenesis	0.00469	0	independent GO term
positive regulation of gene expression	0.0047	0.333333	dependent GO term
positive regulation of gene expression	0.0047	0.166667	dependent GO term
activated T cell proliferation	0.00471	1	dependent GO term
detection of light stimulus	0.00471	0	dependent GO term
phosphatidylcholine metabolic process	0.00471	1	dependent GO term
morphogenesis of an epithelial sheet	0.00471	0.666667	dependent GO term
response to pain	0.00471	0.333333	dependent GO term
negative regulation of nitrogen compound metabolic process	0.00474	0.0833333	dependent GO term
positive regulation of leukocyte mediated immunity	0.00474	0.857143	dependent GO term
positive regulation of B cell activation	0.00474	1	dependent GO term
negative regulation of neuron differentiation	0.00474	0.5	dependent GO term
intrinsic apoptotic signaling pathway by p53 class mediator	0.00474	0	dependent GO term
positive regulation of cytokine secretion	0.00474	0.5	dependent GO term
cellular response to corticosteroid stimulus	0.00474	0.5	dependent GO term
pyridine-containing compound metabolic process	0.00474	0	dependent GO term
negative regulation of G-protein coupled receptor protein signaling pathway	0.00474	1	dependent GO term
purine-containing compound biosynthetic process	0.00481	1	dependent GO term
cell chemotaxis	0.00487	0.4	dependent GO term
ribose phosphate biosynthetic process	0.00487	1	dependent GO term
DNA replication	0.00487	0.75	dependent GO term
transmission of nerve impulse	0.00489	0.2	dependent GO term
positive regulation of adaptive immune response based on somatic recombination of immune receptors built from immunoglobulin superfamily domains	0.00491	0.857143	dependent GO term
dicarboxylic acid transport	0.00491	0	dependent GO term
regulation of neural precursor cell proliferation	0.00491	1	dependent GO term
thioester metabolic process	0.00491	1	dependent GO term
[truncated: 3,055 more rows]

## Sheet: 1-month
GO terms	Significance p-value	diseae enrichment ratio	GO term type
transmembrane receptor protein tyrosine kinase signaling pathway	1.65e-11	0.65	dependent GO term
enzyme linked receptor protein signaling pathway	7.3e-11	0.65	dependent GO term
epidermal growth factor receptor signaling pathway	1.39e-10	0.65	dependent GO term
MyD88-dependent toll-like receptor signaling pathway	2.7e-10	0.75	dependent GO term
ERBB signaling pathway	2.99e-10	0.65	dependent GO term
production of siRNA involved in RNA interference	5.3e-10	0.333333	dependent GO term
anterograde synaptic vesicle transport	1.23e-09	0.6	dependent GO term
anterograde axon cargo transport	4.38e-09	0.6	dependent GO term
positive regulation of RNA metabolic process	8.68e-09	0.363636	dependent GO term
RNA interference	1.06e-08	0.333333	dependent GO term
complement activation	1.09e-08	0.75	dependent GO term
positive regulation of pathway-restricted SMAD protein phosphorylation	1.14e-08	0.8	dependent GO term
positive regulation of gene expression	1.7e-08	0.363636	dependent GO term
protein activation cascade	1.83e-08	0.75	dependent GO term
mRNA modification	1.85e-08	0.333333	dependent GO term
very long-chain fatty acid catabolic process	1.85e-08	0.333333	dependent GO term
cellular response to calcium ion	2.47e-08	0.333333	dependent GO term
positive regulation of macromolecule biosynthetic process	2.54e-08	0.363636	dependent GO term
positive regulation of nucleobase-containing compound metabolic process	2.64e-08	0.363636	dependent GO term
ciliary neurotrophic factor-mediated signaling pathway	2.66e-08	0.5	dependent GO term
protein deneddylation	2.97e-08	0	dependent GO term
cullin deneddylation	2.97e-08	0	dependent GO term
cellular response to sterol depletion	2.97e-08	0.666667	dependent GO term
SREBP signaling pathway	2.97e-08	0.666667	dependent GO term
regulation of transmembrane receptor protein serine/threonine kinase signaling pathway	3.19e-08	0.8	dependent GO term
positive regulation of nitrogen compound metabolic process	3.2e-08	0.363636	dependent GO term
regulation of pathway-restricted SMAD protein phosphorylation	3.69e-08	0.8	dependent GO term
response to sterol depletion	4.45e-08	0.666667	dependent GO term
cellular response to interferon-alpha	4.45e-08	0	dependent GO term
nuclear pore organization	4.45e-08	0.333333	dependent GO term
peptidyl-tyrosine phosphorylation	4.51e-08	0.65	dependent GO term
toll-like receptor signaling pathway	4.69e-08	0.75	dependent GO term
axon cargo transport	4.73e-08	0.6	dependent GO term
peptidyl-tyrosine modification	4.85e-08	0.65	dependent GO term
positive regulation of cellular biosynthetic process	4.93e-08	0.363636	dependent GO term
fibroblast growth factor receptor signaling pathway	5.06e-08	0.25	dependent GO term
pathway-restricted SMAD protein phosphorylation	5.96e-08	0.8	dependent GO term
positive regulation of biosynthetic process	5.98e-08	0.363636	dependent GO term
DNA unwinding involved in DNA replication	9.31e-08	0	dependent GO term
positive regulation of transcription from RNA polymerase II promoter	9.41e-08	0.363636	dependent GO term
pattern recognition receptor signaling pathway	1.07e-07	0.75	dependent GO term
dsRNA fragmentation	1.17e-07	0.333333	dependent GO term
production of small RNA involved in gene silencing by RNA	1.17e-07	0.333333	dependent GO term
innate immune response-activating signal transduction	1.28e-07	0.75	dependent GO term
JNK cascade	1.71e-07	0.333333	dependent GO term
regulation of MAPK cascade	1.77e-07	0.333333	dependent GO term
activation of innate immune response	1.8e-07	0.75	dependent GO term
peptide hormone processing	1.93e-07	1	dependent GO term
humoral immune response	2.01e-07	0.75	dependent GO term
cellular response to fibroblast growth factor stimulus	2.12e-07	0.25	dependent GO term
transmembrane receptor protein serine/threonine kinase signaling pathway	2.53e-07	0.8	dependent GO term
response to lipoteichoic acid	2.84e-07	0.833333	dependent GO term
detection of molecule of bacterial origin	2.84e-07	0.833333	dependent GO term
cellular response to lipoteichoic acid	2.84e-07	0.833333	dependent GO term
ubiquitin-dependent protein catabolic process	2.94e-07	0.25	dependent GO term
response to interferon-alpha	2.97e-07	0	independent GO term
modification-dependent protein catabolic process	3.27e-07	0.25	dependent GO term
modification-dependent macromolecule catabolic process	3.45e-07	0.25	dependent GO term
stress-activated MAPK cascade	3.6e-07	0.333333	dependent GO term
regulation of systemic arterial blood pressure by circulatory renin-angiotensin	3.6e-07	1	dependent GO term
circadian regulation of gene expression	3.6e-07	0.666667	dependent GO term
MAPK cascade	3.86e-07	0.333333	dependent GO term
stress-activated protein kinase signaling cascade	4.05e-07	0.333333	dependent GO term
type I interferon biosynthetic process	4.39e-07	0.75	dependent GO term
Notch signaling pathway	4.52e-07	0.75	dependent GO term
neurotransmitter biosynthetic process	4.54e-07	0.8	dependent GO term
microtubule-based transport	5.37e-07	0.6	dependent GO term
cytoskeleton-dependent intracellular transport	5.73e-07	0.6	dependent GO term
positive regulation of innate immune response	6.06e-07	0.75	dependent GO term
proteolysis involved in cellular protein catabolic process	7.07e-07	0.25	dependent GO term
cellular protein catabolic process	8.61e-07	0.25	dependent GO term
positive regulation of transmembrane receptor protein serine/threonine kinase signaling pathway	9.27e-07	0.8	dependent GO term
positive regulation of macromolecule metabolic process	9.98e-07	0.363636	dependent GO term
positive regulation of kinase activity	1.15e-06	0.65	dependent GO term
positive regulation of cellular metabolic process	1.15e-06	0.363636	dependent GO term
establishment of synaptic vesicle localization	1.16e-06	0.6	dependent GO term
synaptic vesicle transport	1.16e-06	0.6	dependent GO term
transforming growth factor beta receptor signaling pathway	1.18e-06	0.75	dependent GO term
synaptic vesicle localization	1.35e-06	0.6	dependent GO term
cellular response to dsRNA	1.38e-06	0.333333	dependent GO term
posttranscriptional gene silencing	1.38e-06	0.333333	dependent GO term
posttranscriptional gene silencing by RNA	1.38e-06	0.333333	dependent GO term
very long-chain fatty acid metabolic process	1.38e-06	0.333333	dependent GO term
regulation of kinase activity	1.44e-06	0.65	dependent GO term
DNA replication initiation	1.49e-06	0	dependent GO term
binding of sperm to zona pellucida	1.55e-06	0.333333	dependent GO term
regulation of systemic arterial blood pressure by renin-angiotensin	1.55e-06	1	dependent GO term
ephrin receptor signaling pathway	1.55e-06	0	dependent GO term
positive regulation of transferase activity	1.57e-06	0.65	dependent GO term
regulation of innate immune response	1.63e-06	0.75	dependent GO term
sperm-egg recognition	1.73e-06	0.333333	dependent GO term
regulation of transferase activity	2.05e-06	0.65	dependent GO term
positive regulation of metabolic process	2.12e-06	0.363636	dependent GO term
retrograde vesicle-mediated transport, Golgi to ER	2.32e-06	0.2	dependent GO term
cell-cell recognition	2.38e-06	0.333333	dependent GO term
ascending aorta development	2.77e-06	0.5	dependent GO term
ascending aorta morphogenesis	2.77e-06	0.5	dependent GO term
positive regulation of telomere maintenance via telomerase	2.77e-06	0	dependent GO term
regulation of fever generation by regulation of prostaglandin secretion	2.77e-06	1	dependent GO term
positive regulation of fever generation by positive regulation of prostaglandin secretion	2.77e-06	1	dependent GO term
TNFSF11-mediated signaling pathway	2.77e-06	1	dependent GO term
positive regulation of ERK1 and ERK2 cascade via TNFSF11-mediated signaling	2.77e-06	1	dependent GO term
endonucleolytic cleavage in ITS1 to separate SSU-rRNA from 5.8S rRNA and LSU-rRNA from tricistronic rRNA transcript (SSU-rRNA, 5.8S rRNA, LSU-rRNA)	2.77e-06	0	dependent GO term
endonucleolytic cleavage to generate mature 3'-end of SSU-rRNA from (SSU-rRNA, 5.8S rRNA, LSU-rRNA)	2.77e-06	0	dependent GO term
peptide hormone processing	2.95e-06	0.6	dependent GO term
immune response-activating signal transduction	3e-06	0.75	dependent GO term
establishment of vesicle localization	3.12e-06	0.6	dependent GO term
cellular response to metal ion	3.25e-06	0.333333	dependent GO term
cellular response to transforming growth factor beta stimulus	3.34e-06	0.75	dependent GO term
protein catabolic process	3.37e-06	0.25	dependent GO term
vesicle fusion	3.47e-06	0	dependent GO term
adenylate cyclase-inhibiting G-protein coupled receptor signaling pathway	4.11e-06	0.75	dependent GO term
regulation of transcription from RNA polymerase II promoter	4.16e-06	0.363636	dependent GO term
positive regulation of defense response	4.31e-06	0.75	dependent GO term
immune response-regulating signaling pathway	4.42e-06	0.75	dependent GO term
BMP signaling pathway	4.47e-06	0.8	dependent GO term
cellular macromolecule catabolic process	4.5e-06	0.25	dependent GO term
regulation of cell proliferation	4.81e-06	0.65	independent GO term
regulation of systemic arterial blood pressure by hormone	4.84e-06	1	dependent GO term
cellular response to inorganic substance	5e-06	0.333333	dependent GO term
positive regulation of DNA damage response, signal transduction by p53 class mediator	5.29e-06	0.166667	dependent GO term
positive regulation of cell cycle process	5.38e-06	0.65	dependent GO term
negative regulation of B cell activation	5.38e-06	0.75	dependent GO term
cytolysis	5.38e-06	0.75	independent GO term
response to dsRNA	5.65e-06	0.333333	dependent GO term
DNA duplex unwinding	6.12e-06	0	dependent GO term
transcription from RNA polymerase II promoter	6.14e-06	0.363636	dependent GO term
response to calcium ion	6.22e-06	0.333333	dependent GO term
ER-nucleus signaling pathway	6.54e-06	0.666667	dependent GO term
negative regulation of apoptotic process	6.57e-06	0.65	dependent GO term
gene silencing by RNA	7.01e-06	0.333333	dependent GO term
transcription initiation from RNA polymerase II promoter	7.01e-06	0.333333	dependent GO term
regulation of circadian rhythm	7.01e-06	0.666667	independent GO term
tRNA aminoacylation for protein translation	7.01e-06	0	dependent GO term
vesicle localization	7.39e-06	0.6	dependent GO term
regulation of RNA biosynthetic process	7.42e-06	0.363636	dependent GO term
regulation of systemic arterial blood pressure mediated by a chemical signal	7.51e-06	1	dependent GO term
negative regulation of programmed cell death	7.58e-06	0.65	dependent GO term
activation of immune response	8.31e-06	0.75	dependent GO term
activation of immune response	8.31e-06	0.75	dependent GO term
post-chaperonin tubulin folding pathway	8.32e-06	0	dependent GO term
Tie signaling pathway	8.32e-06	1	dependent GO term
spinal cord oligodendrocyte cell differentiation	8.32e-06	0.5	dependent GO term
spinal cord oligodendrocyte cell fate specification	8.32e-06	0.5	dependent GO term
synaptic transmission involved in micturition	8.32e-06	0	dependent GO term
RNA phosphodiester bond hydrolysis, endonucleolytic	8.32e-06	0	dependent GO term
cleavage involved in rRNA processing	8.32e-06	0	dependent GO term
endonucleolytic cleavage involved in rRNA processing	8.32e-06	0	dependent GO term
endonucleolytic cleavage of tricistronic rRNA transcript (SSU-rRNA, 5.8S rRNA, LSU-rRNA)	8.32e-06	0	dependent GO term
rRNA 3'-end processing	8.32e-06	0	dependent GO term
pigment catabolic process	8.32e-06	1	dependent GO term
heme catabolic process	8.32e-06	1	dependent GO term
positive regulation of signal transduction by p53 class mediator	8.42e-06	0.166667	dependent GO term
extrinsic apoptotic signaling pathway via death domain receptors	9.16e-06	0.5	dependent GO term
amino acid activation	9.16e-06	0	dependent GO term
tRNA aminoacylation	9.16e-06	0	dependent GO term
developmental process involved in reproduction	9.22e-06	0.8	dependent GO term
detection of biotic stimulus	9.23e-06	0.833333	dependent GO term
morphogenesis of a branching epithelium	9.4e-06	0.75	dependent GO term
cytidine to uridine editing	9.5e-06	0.333333	dependent GO term
angiotensin maturation	9.5e-06	1	dependent GO term
sequestering of TGFbeta in extracellular matrix	9.5e-06	0.666667	dependent GO term
neutrophil aggregation	9.5e-06	0.666667	dependent GO term
peroxisomal long-chain fatty acid import	9.5e-06	0.333333	dependent GO term
regulation of RNA metabolic process	9.62e-06	0.363636	dependent GO term
DNA geometric change	1.08e-05	0	dependent GO term
cellular response to molecule of bacterial origin	1.19e-05	0.833333	dependent GO term
morphogenesis of a branching structure	1.19e-05	0.75	dependent GO term
microtubule-based movement	1.3e-05	0.6	dependent GO term
RNA biosynthetic process	1.37e-05	0.363636	dependent GO term
fibroblast growth factor receptor signaling pathway	1.39e-05	0.25	dependent GO term
RNA modification	1.39e-05	0.333333	dependent GO term
negative regulation of cell death	1.45e-05	0.65	dependent GO term
type I interferon production	1.45e-05	0.75	dependent GO term
auditory receptor cell differentiation	1.59e-05	0.75	dependent GO term
organelle fusion	1.63e-05	0	independent GO term
fatty acid beta-oxidation	1.63e-05	0.333333	dependent GO term
transmembrane receptor protein serine/threonine kinase signaling pathway	1.66e-05	0.75	dependent GO term
prolactin signaling pathway	1.66e-05	1	dependent GO term
regulation of auditory receptor cell differentiation	1.66e-05	0.5	dependent GO term
regulation of oxidative phosphorylation uncoupler activity	1.66e-05	0.5	dependent GO term
positive regulation of telomere maintenance	1.66e-05	0	dependent GO term
microtubule anchoring at centrosome	1.66e-05	0.5	dependent GO term
RNA phosphodiester bond hydrolysis	1.66e-05	0	dependent GO term
detection of carbohydrate stimulus	1.66e-05	1	dependent GO term
detection of monosaccharide stimulus	1.66e-05	1	dependent GO term
detection of hexose stimulus	1.66e-05	1	dependent GO term
detection of glucose	1.66e-05	1	dependent GO term
mechanoreceptor differentiation	1.72e-05	1	dependent GO term
cellular response to biotic stimulus	1.77e-05	0.833333	dependent GO term
regulation of bone mineralization	1.81e-05	1	dependent GO term
regulation of cellular macromolecule biosynthetic process	1.9e-05	0.363636	dependent GO term
hair cell differentiation	1.9e-05	0.75	dependent GO term
nucleus organization	1.91e-05	0.333333	independent GO term
macromolecule catabolic process	1.93e-05	0.25	dependent GO term
cardiac ventricle morphogenesis	2e-05	0.666667	dependent GO term
neurotransmitter metabolic process	2.1e-05	0.8	dependent GO term
single fertilization	2.1e-05	0.333333	dependent GO term
mRNA transport	2.1e-05	0.333333	dependent GO term
establishment of organelle localization	2.13e-05	0.6	dependent GO term
cerebral cortex cell migration	2.24e-05	0.75	dependent GO term
complement activation	2.24e-05	0.75	dependent GO term
regulation of biomineral tissue development	2.31e-05	1	dependent GO term
regulation of protein kinase activity	2.32e-05	0.65	dependent GO term
regulation of macromolecule biosynthetic process	2.45e-05	0.363636	dependent GO term
proteolysis involved in cellular protein catabolic process	2.52e-05	0.333333	dependent GO term
positive regulation of protein kinase activity	2.57e-05	0.65	dependent GO term
enzyme linked receptor protein signaling pathway	2.62e-05	0.8	dependent GO term
positive regulation of protein phosphorylation	2.64e-05	0.65	dependent GO term
regulation of mechanoreceptor differentiation	2.77e-05	0.5	dependent GO term
regulation of inner ear receptor cell differentiation	2.77e-05	0.5	dependent GO term
positive regulation of anoikis	2.77e-05	0	dependent GO term
ciliary neurotrophic factor-mediated signaling pathway	2.77e-05	1	dependent GO term
glial cell fate specification	2.77e-05	0.5	dependent GO term
oligodendrocyte cell fate specification	2.77e-05	0.5	dependent GO term
positive regulation of cytoplasmic mRNA processing body assembly	2.77e-05	0	dependent GO term
succinyl-CoA metabolic process	2.77e-05	0	dependent GO term
membrane tubulation	2.77e-05	0	dependent GO term
positive regulation of saliva secretion	2.77e-05	1	dependent GO term
maturation of 5.8S rRNA from tricistronic rRNA transcript (SSU-rRNA, 5.8S rRNA, LSU-rRNA)	2.77e-05	0	dependent GO term
positive regulation of interleukin-23 production	2.77e-05	0.5	dependent GO term
regulation of JNK cascade	2.78e-05	0.333333	dependent GO term
regulation of protein phosphorylation	2.81e-05	0.65	dependent GO term
spindle midzone assembly involved in mitosis	2.85e-05	0.666667	dependent GO term
targeting of mRNA for destruction involved in RNA interference	2.85e-05	0.333333	dependent GO term
cellular protein catabolic process	2.97e-05	0.333333	dependent GO term
regulation of peptidyl-tyrosine phosphorylation	3e-05	0.65	dependent GO term
mesenchymal cell apoptotic process	3.11e-05	0.363636	dependent GO term
regulation of mesenchymal cell apoptotic process	3.11e-05	0.363636	dependent GO term
protein activation cascade	3.28e-05	0.75	dependent GO term
cell recognition	3.29e-05	0.333333	independent GO term
protein modification by small protein removal	3.43e-05	0	dependent GO term
positive regulation of phosphorylation	3.46e-05	0.65	dependent GO term
positive regulation of immune response	3.46e-05	0.75	dependent GO term
positive regulation of immune response	3.46e-05	0.75	dependent GO term
fatty acid catabolic process	3.58e-05	0.333333	dependent GO term
positive regulation of bone mineralization	3.64e-05	0.8	dependent GO term
nucleobase-containing compound biosynthetic process	3.73e-05	0.363636	dependent GO term
innate immune response	3.83e-05	0.75	dependent GO term
regulation of cellular biosynthetic process	3.84e-05	0.363636	dependent GO term
cellular response to stress	3.85e-05	0.333333	dependent GO term
response to wounding	3.91e-05	0.65	dependent GO term
positive regulation of biomineral tissue development	4.01e-05	0.8	dependent GO term
cellular response to fibroblast growth factor stimulus	4.03e-05	0.25	dependent GO term
gene silencing	4.03e-05	0.333333	dependent GO term
endocrine process	4.03e-05	1	independent GO term
fatty acid oxidation	4.03e-05	0.333333	dependent GO term
negative regulation of dendrite morphogenesis	4.16e-05	0	dependent GO term
vascular smooth muscle cell development	4.16e-05	0.5	dependent GO term
isocitrate metabolic process	4.16e-05	0	dependent GO term
potassium ion import	4.16e-05	1	dependent GO term
regulation of telomere maintenance via telomerase	4.16e-05	0	dependent GO term
oligodendrocyte cell fate commitment	4.16e-05	0.5	dependent GO term
microtubule anchoring at microtubule organizing center	4.16e-05	0.5	dependent GO term
tachykinin receptor signaling pathway	4.16e-05	1	dependent GO term
regulation of saliva secretion	4.16e-05	1	dependent GO term
ISG15-protein conjugation	4.16e-05	0.5	dependent GO term
exonucleolytic nuclear-transcribed mRNA catabolic process involved in deadenylation-dependent decay	4.16e-05	0	dependent GO term
fibroblast activation	4.16e-05	0.5	dependent GO term
cell proliferation	4.29e-05	0.65	independent GO term
lipid homeostasis	4.35e-05	1	dependent GO term
nucleic acid transport	4.35e-05	0.333333	dependent GO term
establishment of RNA localization	4.35e-05	0.333333	dependent GO term
RNA transport	4.35e-05	0.333333	dependent GO term
regulation of biosynthetic process	4.38e-05	0.363636	dependent GO term
regulation of nucleobase-containing compound metabolic process	4.39e-05	0.363636	dependent GO term
regulation of systemic arterial blood pressure	4.52e-05	1	dependent GO term
membrane fusion	4.52e-05	0	dependent GO term
lipid oxidation	4.52e-05	0.333333	dependent GO term
regulation of gene expression	4.58e-05	0.363636	dependent GO term
aromatic compound biosynthetic process	4.61e-05	0.363636	dependent GO term
regulation of cysteine-type endopeptidase activity involved in apoptotic process	4.62e-05	0.833333	dependent GO term
heterocycle biosynthetic process	4.64e-05	0.363636	dependent GO term
telencephalon cell migration	4.89e-05	0.75	dependent GO term
regulation of stress-activated MAPK cascade	4.97e-05	0.333333	dependent GO term
activation of cysteine-type endopeptidase activity involved in apoptotic process	5.05e-05	0.666667	dependent GO term
regulation of nitrogen compound metabolic process	5.06e-05	0.363636	dependent GO term
regulation of stress-activated protein kinase signaling cascade	5.11e-05	0.333333	dependent GO term
cardiac cell development	5.21e-05	0.75	dependent GO term
neuropeptide signaling pathway	5.23e-05	0.25	dependent GO term
positive regulation of tumor necrosis factor production	5.29e-05	0.833333	dependent GO term
regulation of defense response	5.31e-05	0.75	dependent GO term
cell-substrate adhesion	5.34e-05	1	dependent GO term
ephrin receptor signaling pathway	5.41e-05	0.666667	dependent GO term
regulation of DNA damage response, signal transduction by p53 class mediator	5.41e-05	0.166667	dependent GO term
RNA localization	5.42e-05	0.333333	dependent GO term
cellular nitrogen compound biosynthetic process	5.51e-05	0.363636	dependent GO term
mesenchymal cell proliferation	5.53e-05	0.25	dependent GO term
monocarboxylic acid catabolic process	5.61e-05	0.333333	dependent GO term
regulation of cysteine-type endopeptidase activity	5.68e-05	0.833333	dependent GO term
renal control of peripheral vascular resistance involved in regulation of systemic arterial blood pressure	5.7e-05	0.75	dependent GO term
renin-angiotensin regulation of aldosterone production	5.7e-05	0.75	dependent GO term
regulation of blood vessel size by renin-angiotensin	5.7e-05	0.75	dependent GO term
spindle midzone assembly	5.7e-05	0.666667	dependent GO term
negative regulation of macrophage cytokine production	5.7e-05	1	dependent GO term
vein smooth muscle contraction	5.7e-05	0.666667	dependent GO term
protein localization to extracellular region	5.7e-05	0.666667	dependent GO term
maintenance of protein location in extracellular region	5.7e-05	0.666667	dependent GO term
activation of cysteine-type endopeptidase activity	5.81e-05	0.666667	dependent GO term
bone mineralization	5.81e-05	1	dependent GO term
tubulin complex biogenesis	5.82e-05	0	independent GO term
SRP-dependent cotranslational protein targeting to membrane	5.82e-05	0	dependent GO term
thyroid hormone transport	5.82e-05	0.5	dependent GO term
regulation of cytoplasmic mRNA processing body assembly	5.82e-05	0	dependent GO term
Mo-molybdopterin cofactor metabolic process	5.82e-05	0	dependent GO term
molybdopterin cofactor biosynthetic process	5.82e-05	0	dependent GO term
Mo-molybdopterin cofactor biosynthetic process	5.82e-05	0	dependent GO term
positive regulation of synaptic transmission, cholinergic	5.82e-05	1	dependent GO term
positive regulation of action potential	5.82e-05	1	dependent GO term
ncRNA 3'-end processing	5.82e-05	0	dependent GO term
positive regulation of cytokine production involved in inflammatory response	5.82e-05	0.5	dependent GO term
forebrain cell migration	5.87e-05	0.75	dependent GO term
transmembrane receptor protein tyrosine kinase signaling pathway	5.9e-05	0.428571	dependent GO term
response to mechanical stimulus	5.91e-05	0.333333	dependent GO term
regulation of phosphorylation	6.2e-05	0.65	dependent GO term
inner ear receptor cell differentiation	6.22e-05	0.75	dependent GO term
response to light stimulus	6.28e-05	0.333333	dependent GO term
organic cyclic compound biosynthetic process	6.41e-05	0.363636	dependent GO term
cardiac ventricle development	6.65e-05	0.666667	dependent GO term
cholesterol metabolic process	6.87e-05	0.666667	dependent GO term
vesicle organization	6.87e-05	0	independent GO term
regulation of protein kinase activity	6.88e-05	0.5	dependent GO term
negative regulation of cell proliferation	6.95e-05	0.5	dependent GO term
striated muscle contraction	7.1e-05	0.333333	dependent GO term
lateral motor column neuron migration	7.16e-05	0.75	dependent GO term
reelin-mediated signaling pathway	7.16e-05	0.75	dependent GO term
trachea formation	7.16e-05	0.75	dependent GO term
atrioventricular node development	7.16e-05	0.75	dependent GO term
inactivation of MAPK activity	7.38e-05	0.5	dependent GO term
regulation of interleukin-12 production	7.39e-05	0.8	dependent GO term
fertilization	7.57e-05	0.333333	dependent GO term
histone H2B ubiquitination	7.76e-05	0.25	dependent GO term
protein localization to chromatin	7.76e-05	0	dependent GO term
chemosensory behavior	7.76e-05	0.5	dependent GO term
urinary bladder smooth muscle contraction	7.76e-05	0	dependent GO term
prosthetic group metabolic process	7.76e-05	0	independent GO term
molybdopterin cofactor metabolic process	7.76e-05	0	dependent GO term
regulation of synaptic transmission, cholinergic	7.76e-05	1	dependent GO term
tetrapyrrole catabolic process	7.76e-05	1	dependent GO term
porphyrin-containing compound catabolic process	7.76e-05	1	dependent GO term
nuclear-transcribed mRNA catabolic process, exonucleolytic	7.76e-05	0	dependent GO term
melanin biosynthetic process	7.76e-05	0.5	dependent GO term
regulation of cytokine production involved in inflammatory response	7.76e-05	0.5	dependent GO term
interleukin-23 production	7.76e-05	0.5	dependent GO term
regulation of interleukin-23 production	7.76e-05	0.5	dependent GO term
adenylate cyclase-modulating G-protein coupled receptor signaling pathway	7.81e-05	0.75	dependent GO term
skeletal muscle cell differentiation	7.81e-05	1	dependent GO term
adenylate cyclase-modulating G-protein coupled receptor signaling pathway	7.81e-05	1	dependent GO term
neurotransmitter secretion	7.81e-05	0.666667	dependent GO term
regulation of immune system process	8.06e-05	0.333333	independent GO term
RNA metabolic process	8.07e-05	0.363636	dependent GO term
organelle localization	8.19e-05	0.6	dependent GO term
sterol metabolic process	8.31e-05	0.666667	dependent GO term
positive regulation of nuclear division	8.62e-05	0.65	dependent GO term
positive regulation of mitosis	8.62e-05	0.65	dependent GO term
interleukin-12 production	8.62e-05	0.8	dependent GO term
mechanoreceptor differentiation	8.63e-05	0.75	dependent GO term
nucleobase-containing compound transport	8.83e-05	0.333333	dependent GO term
cell surface receptor signaling pathway	9.06e-05	0.65	dependent GO term
cardiac chamber morphogenesis	9.09e-05	0.666667	dependent GO term
protein catabolic process	9.23e-05	0.333333	dependent GO term
tRNA metabolic process	9.37e-05	0	dependent GO term
negative regulation of neurotrophin TRK receptor signaling pathway	9.5e-05	0.75	dependent GO term
type III hypersensitivity	9.5e-05	0.75	dependent GO term
regulation of type III hypersensitivity	9.5e-05	0.75	dependent GO term
positive regulation of type III hypersensitivity	9.5e-05	0.75	dependent GO term
frontal suture morphogenesis	9.5e-05	1	dependent GO term
base conversion or substitution editing	9.5e-05	0.333333	dependent GO term
bone mineralization involved in bone maturation	9.5e-05	1	dependent GO term
Clara cell differentiation	9.5e-05	0.666667	dependent GO term
sequestering of extracellular ligand from receptor	9.5e-05	0.666667	dependent GO term
transmembrane receptor protein tyrosine kinase signaling pathway	9.54e-05	0.25	dependent GO term
positive regulation of transport	9.75e-05	0.65	dependent GO term
nuclear division	9.81e-05	0.333333	dependent GO term
mitosis	9.81e-05	0.333333	dependent GO term
regulation of kinase activity	9.89e-05	0.5	dependent GO term
cotranslational protein targeting to membrane	9.98e-05	0	dependent GO term
protein targeting to ER	9.98e-05	0	dependent GO term
disruption by host of symbiont cells	9.98e-05	0.5	dependent GO term
killing by host of symbiont cells	9.98e-05	0.5	dependent GO term
positive regulation of steroid hormone biosynthetic process	9.98e-05	1	dependent GO term
transcription from mitochondrial promoter	9.98e-05	0	dependent GO term
Golgi localization	9.98e-05	0	dependent GO term
telomere maintenance via telomerase	9.98e-05	0	dependent GO term
peristalsis	9.98e-05	0	dependent GO term
urinary tract smooth muscle contraction	9.98e-05	0	dependent GO term
purinergic nucleotide receptor signaling pathway	9.98e-05	0	dependent GO term
lens fiber cell development	9.98e-05	0.5	dependent GO term
positive regulation of prostaglandin secretion	9.98e-05	1	dependent GO term
behavioral response to nicotine	9.98e-05	0	dependent GO term
melanin metabolic process	9.98e-05	0.5	dependent GO term
cytokine production involved in inflammatory response	9.98e-05	0.5	dependent GO term
regulation of cellular protein metabolic process	0.000101	0.65	dependent GO term
positive regulation of developmental process	0.000102	0.8	dependent GO term
regulation of muscle contraction	0.000102	1	dependent GO term
cardiocyte differentiation	0.000105	0.666667	dependent GO term
regulation of cytokine production	0.000106	0.75	dependent GO term
positive regulation of phosphorus metabolic process	0.000108	0.65	dependent GO term
positive regulation of phosphate metabolic process	0.000108	0.65	dependent GO term
G-protein coupled receptor signaling pathway, coupled to cyclic nucleotide second messenger	0.000108	0.75	dependent GO term
cellular response to growth factor stimulus	0.000108	0.25	dependent GO term
cellular response to growth factor stimulus	0.000108	0.75	dependent GO term
G-protein coupled receptor signaling pathway, coupled to cyclic nucleotide second messenger	0.000108	1	dependent GO term
actin polymerization or depolymerization	0.000114	0	dependent GO term
biomineral tissue development	0.000114	1	dependent GO term
positive regulation of ossification	0.000115	0.8	dependent GO term
cellular macromolecule catabolic process	0.000117	0.333333	dependent GO term
positive regulation of cysteine-type endopeptidase activity involved in apoptotic process	0.000117	0.666667	dependent GO term
positive regulation of protein modification process	0.000121	0.65	dependent GO term
regulation of transferase activity	0.000121	0.5	dependent GO term
regulation of immune response	0.000123	0.75	dependent GO term
regulation of immune response	0.000123	0.75	dependent GO term
positive regulation of immune effector process	0.000124	0.666667	dependent GO term
complement activation, lectin pathway	0.000125	0.666667	dependent GO term
positive regulation of growth hormone secretion	0.000125	1	dependent GO term
response to interleukin-15	0.000125	1	independent GO term
establishment of protein localization to endoplasmic reticulum	0.000125	0	dependent GO term
3'-UTR-mediated mRNA stabilization	0.000125	0	dependent GO term
retrograde transport, vesicle recycling within Golgi	0.000125	0	dependent GO term
interleukin-6-mediated signaling pathway	0.000125	1	dependent GO term
inner cell mass cell proliferation	0.000125	1	dependent GO term
negative regulation of intracellular estrogen receptor signaling pathway	0.000125	0	dependent GO term
succinate metabolic process	0.000125	0	dependent GO term
prostaglandin secretion	0.000125	1	dependent GO term
positive regulation of fever generation	0.000125	1	dependent GO term
regulation of prostaglandin secretion	0.000125	1	dependent GO term
saliva secretion	0.000125	1	dependent GO term
micturition	0.000125	0	dependent GO term
secondary metabolite biosynthetic process	0.000125	0.5	dependent GO term
DNA-dependent DNA replication	0.000127	0	dependent GO term
regulation of gene expression, epigenetic	0.000131	0.333333	dependent GO term
protein processing	0.000131	1	dependent GO term
regulation of stress fiber assembly	0.000132	0.5	dependent GO term
immune effector process	0.000138	0.75	dependent GO term
cardiac chamber development	0.000138	0.666667	dependent GO term
positive regulation of cysteine-type endopeptidase activity	0.000141	0.666667	dependent GO term
cyclic nucleotide biosynthetic process	0.000141	1	dependent GO term
cyclic purine nucleotide metabolic process	0.000141	1	dependent GO term
collagen fibril organization	0.000143	0.666667	dependent GO term
adenylate cyclase-inhibiting G-protein coupled receptor signaling pathway	0.000143	0.166667	dependent GO term
motor neuron migration	0.000143	0.75	dependent GO term
spinal cord motor neuron migration	0.000143	0.75	dependent GO term
leukemia inhibitory factor signaling pathway	0.000143	0.5	dependent GO term
type II hypersensitivity	0.000143	0.75	dependent GO term
type IIa hypersensitivity	0.000143	0.75	dependent GO term
regulation of type II hypersensitivity	0.000143	0.75	dependent GO term
regulation of type IIa hypersensitivity	0.000143	0.75	dependent GO term
positive regulation of type II hypersensitivity	0.000143	0.75	dependent GO term
positive regulation of type IIa hypersensitivity	0.000143	0.75	dependent GO term
dichotomous subdivision of terminal units involved in salivary gland branching	0.000143	0.75	dependent GO term
positive regulation of female receptivity	0.000143	0.5	dependent GO term
regulation of cardiac muscle contraction by regulation of the release of sequestered calcium ion	0.000143	0.333333	dependent GO term
menstrual cycle phase	0.000143	1	dependent GO term
receptor guanylyl cyclase signaling pathway	0.000143	1	dependent GO term
Type II pneumocyte differentiation	0.000143	0.666667	dependent GO term
positive regulation of male gonad development	0.000143	0.333333	dependent GO term
negative regulation of platelet activation	0.000143	1	dependent GO term
detection of lipopolysaccharide	0.000146	0.833333	dependent GO term
response to peptidoglycan	0.000152	1	dependent GO term
RNA-dependent DNA replication	0.000152	0	dependent GO term
regulation of stem cell maintenance	0.000152	0	dependent GO term
regulation of ventricular cardiac muscle cell membrane repolarization	0.000152	1	dependent GO term
positive regulation of synaptic transmission, GABAergic	0.000152	1	dependent GO term
positive regulation of digestive system process	0.000152	1	dependent GO term
maturation of 5.8S rRNA	0.000152	0	dependent GO term
translesion synthesis	0.000152	0	dependent GO term
organelle fission	0.000156	0.333333	independent GO term
homophilic cell adhesion	0.000156	0	dependent GO term
positive regulation of cellular process	0.00016	0.363636	dependent GO term
regulation of heart contraction	0.00016	1	dependent GO term
protein maturation	0.00016	1	dependent GO term
circadian rhythm	0.00016	0.666667	dependent GO term
signal transduction	0.000164	0.65	dependent GO term
morphogenesis of an epithelium	0.000165	0.75	dependent GO term
cellular response to mechanical stimulus	0.000165	0.75	dependent GO term
peptidyl-amino acid modification	0.000166	0.65	dependent GO term
regulation of protein modification process	0.000168	0.65	dependent GO term
positive regulation of osteoblast differentiation	0.000168	0.8	dependent GO term
proteolysis	0.000169	0.25	dependent GO term
regulation of signal transduction by p53 class mediator	0.000169	0.166667	dependent GO term
positive regulation of cell migration	0.000174	1	dependent GO term
cytokine production	0.000174	0.75	independent GO term
negative regulation of neuron apoptotic process	0.000177	1	dependent GO term
positive regulation of endopeptidase activity	0.000181	0.666667	dependent GO term
NADH metabolic process	0.000183	0	dependent GO term
spinal cord motor neuron cell fate specification	0.000183	0.5	dependent GO term
regulation of proton transport	0.000183	0.5	dependent GO term
telomere maintenance via telomere lengthening	0.000183	0	dependent GO term
protein-DNA complex disassembly	0.000183	0.5	dependent GO term
chromatin disassembly	0.000183	0.5	dependent GO term
nucleosome disassembly	0.000183	0.5	dependent GO term
aldosterone metabolic process	0.000183	0.5	dependent GO term
positive regulation of heat generation	0.000183	1	dependent GO term
regulation of fever generation	0.000183	1	dependent GO term
positive regulation of renal sodium excretion	0.000183	1	dependent GO term
positive regulation of cell motility	0.000185	1	dependent GO term
endocrine system development	0.000185	0.666667	dependent GO term
endocrine system development	0.000185	0.333333	dependent GO term
insulin receptor signaling pathway	0.000187	0.75	dependent GO term
neurotransmitter transport	0.000189	0.666667	dependent GO term
humoral immune response	0.000194	0.75	dependent GO term
positive regulation of cell cycle	0.000195	0.65	dependent GO term
cellular sodium ion homeostasis	0.0002	0.75	dependent GO term
brain renin-angiotensin system	0.0002	0.75	dependent GO term
antigen processing and presentation of exogenous peptide antigen via MHC class I	0.0002	0.75	dependent GO term
positive regulation of myeloid leukocyte mediated immunity	0.0002	0.75	dependent GO term
regulation of cardiac muscle contraction by calcium ion signaling	0.0002	0.333333	dependent GO term
pre-miRNA processing	0.0002	0.333333	dependent GO term
regulation of angiotensin levels in blood	0.0002	1	dependent GO term
regulation of male gonad development	0.0002	0.333333	dependent GO term
regulation of T-helper 1 cell differentiation	0.0002	0.666667	dependent GO term
nuclear pore complex assembly	0.0002	0.333333	dependent GO term
sodium ion transport	0.000203	1	dependent GO term
positive regulation of cellular component movement	0.000205	1	dependent GO term
regulation of muscle system process	0.000208	1	dependent GO term
positive regulation of locomotion	0.000214	1	dependent GO term
regulation of growth hormone secretion	0.000216	1	dependent GO term
disruption of cells of other organism involved in symbiotic interaction	0.000216	0.5	dependent GO term
killing of cells in other organism involved in symbiotic interaction	0.000216	0.5	dependent GO term
interleukin-1-mediated signaling pathway	0.000216	1	dependent GO term
vascular smooth muscle cell differentiation	0.000216	0.5	dependent GO term
positive regulation of hormone biosynthetic process	0.000216	1	dependent GO term
positive regulation of oligodendrocyte differentiation	0.000216	0.5	dependent GO term
positive regulation of organelle assembly	0.000216	0	dependent GO term
semaphorin-plexin signaling pathway	0.000216	0	dependent GO term
mineralocorticoid metabolic process	0.000216	0.5	dependent GO term
prostaglandin transport	0.000216	1	dependent GO term
positive regulation of icosanoid secretion	0.000216	1	dependent GO term
formation of translation preinitiation complex	0.000216	0	dependent GO term
positive regulation of peptidase activity	0.000217	0.666667	dependent GO term
regulation of stem cell proliferation	0.000218	0.75	dependent GO term
regulation of endopeptidase activity	0.000221	0.833333	dependent GO term
sex differentiation	0.000221	0.8	dependent GO term
epithelial cell proliferation	0.000224	0.8	dependent GO term
regulation of mitotic cell cycle	0.000226	0.65	dependent GO term
cell activation involved in immune response	0.000227	0.666667	dependent GO term
leukocyte activation involved in immune response	0.000227	0.666667	dependent GO term
regulation of actin filament bundle assembly	0.000228	0.5	dependent GO term
platelet activation	0.000236	1	dependent GO term
lipid modification	0.000237	0.333333	dependent GO term
positive regulation of dendritic spine morphogenesis	0.000239	0.75	dependent GO term
response to indole-3-methanol	0.000239	0.75	dependent GO term
cellular response to indole-3-methanol	0.000239	0.75	dependent GO term
Notch signaling involved in heart development	0.000239	0.75	dependent GO term
positive regulation of immune system process	0.000243	0.75	dependent GO term
positive regulation of immune system process	0.000243	0.75	dependent GO term
negative regulation of neuron death	0.000247	1	dependent GO term
negative regulation of potassium ion transport	0.000252	1	dependent GO term
regulation of telomere maintenance	0.000252	0	dependent GO term
blastocyst growth	0.000252	1	dependent GO term
glial cell fate commitment	0.000252	0.5	dependent GO term
maturation of SSU-rRNA from tricistronic rRNA transcript (SSU-rRNA, 5.8S rRNA, LSU-rRNA)	0.000252	0	dependent GO term
serotonin receptor signaling pathway	0.000252	1	dependent GO term
regulation of neurotransmitter levels	0.000253	0.666667	dependent GO term
cellular lipid catabolic process	0.000253	0.333333	dependent GO term
osteoblast differentiation	0.000258	1	dependent GO term
stress fiber assembly	0.000262	0.5	dependent GO term
intrinsic apoptotic signaling pathway by p53 class mediator	0.000262	0.2	dependent GO term
protein folding	0.000264	0.333333	dependent GO term
embryonic neurocranium morphogenesis	0.000266	1	dependent GO term
regulation of angiotensin metabolic process	0.000266	1	dependent GO term
protein targeting to Golgi	0.000266	0	dependent GO term
regulation of T-helper 2 cell differentiation	0.000266	0.666667	dependent GO term
negative regulation of CD4-positive, alpha-beta T cell differentiation	0.000266	0.666667	dependent GO term
negative regulation of T-helper cell differentiation	0.000266	0.666667	dependent GO term
positive regulation of T-helper cell differentiation	0.000266	0.666667	dependent GO term
heart process	0.000269	1	dependent GO term
heart contraction	0.000269	1	dependent GO term
regulation of B cell activation	0.000271	0.75	dependent GO term
positive regulation of cAMP metabolic process	0.000276	0.5	dependent GO term
regulation of bone mineralization	0.000276	0.8	dependent GO term
reproductive structure development	0.000276	0.8	dependent GO term
regulation of peptidase activity	0.00028	0.833333	dependent GO term
reproductive system development	0.000283	0.8	dependent GO term
regulation of leukocyte activation	0.000287	0.333333	dependent GO term
adenohypophysis development	0.000291	1	dependent GO term
negative regulation of NF-kappaB import into nucleus	0.000291	0.5	dependent GO term
tricarboxylic acid metabolic process	0.000291	0	dependent GO term
regulation of heat generation	0.000291	1	dependent GO term
maturation of SSU-rRNA	0.000291	0	dependent GO term
positive regulation of neurogenesis	0.000304	1	dependent GO term
positive regulation of cell proliferation	0.000306	0.65	dependent GO term
cerebral cortex development	0.000312	0.75	dependent GO term
regulation of intracellular steroid hormone receptor signaling pathway	0.000319	0.5	dependent GO term
negative regulation of cell proliferation	0.000321	0.75	dependent GO term
cytokine biosynthetic process	0.000322	0.75	dependent GO term
multi-organism process	0.00033	0.333333	independent GO term
response to lipopolysaccharide	0.000332	0.833333	dependent GO term
2-oxoglutarate metabolic process	0.000333	0	dependent GO term
positive regulation of hormone metabolic process	0.000333	1	dependent GO term
mitochondrial RNA metabolic process	0.000333	0	dependent GO term
transcription from RNA polymerase I promoter	0.000333	0	dependent GO term
cytoplasmic mRNA processing body assembly	0.000333	0	dependent GO term
phasic smooth muscle contraction	0.000333	0	dependent GO term
behavioral response to pain	0.000333	0	dependent GO term
fever generation	0.000333	1	dependent GO term
regulation of icosanoid secretion	0.000333	1	dependent GO term
positive regulation of fatty acid transport	0.000333	1	dependent GO term
hormone metabolic process	0.000335	1	dependent GO term
blood vessel development	0.000338	0.75	dependent GO term
regulation of neurotrophin TRK receptor signaling pathway	0.000342	0.75	dependent GO term
Fc receptor signaling pathway	0.000342	0.75	dependent GO term
positive regulation of hypersensitivity	0.000342	0.75	dependent GO term
response to redox state	0.000342	0.333333	independent GO term
histone H3 deacetylation	0.000342	0.333333	dependent GO term
ossification involved in bone maturation	0.000342	1	dependent GO term
establishment of protein localization to Golgi	0.000342	0	dependent GO term
lung saccule development	0.000342	0.666667	dependent GO term
microtubule nucleation	0.000342	0	dependent GO term
negative regulation of CD4-positive, alpha-beta T cell activation	0.000342	0.666667	dependent GO term
mesenchyme development	0.000342	0.666667	dependent GO term
cardiac ventricle formation	0.000342	0.666667	dependent GO term
extracellular regulation of signal transduction	0.000342	0.666667	dependent GO term
extracellular negative regulation of signal transduction	0.000342	0.666667	dependent GO term
leukocyte migration involved in inflammatory response	0.000342	0.666667	dependent GO term
leukocyte aggregation	0.000342	0.666667	dependent GO term
pore complex assembly	0.000342	0.333333	independent GO term
negative regulation of lymphocyte activation	0.000344	0.75	dependent GO term
cyclic nucleotide metabolic process	0.000348	1	dependent GO term
regulation of biomineral tissue development	0.000352	0.8	dependent GO term
positive regulation of cellular protein metabolic process	0.000358	0.65	dependent GO term
negative regulation of stem cell differentiation	0.000358	0.75	dependent GO term
complement activation, alternative pathway	0.000358	0.75	dependent GO term
forebrain anterior/posterior pattern specification	0.000358	0.25	dependent GO term
negative regulation of cAMP-dependent protein kinase activity	0.000358	0.25	dependent GO term
positive regulation of cell migration	0.00036	0.65	dependent GO term
nucleic acid metabolic process	0.00036	0.363636	dependent GO term
cytokine metabolic process	0.000367	0.75	dependent GO term
regulation of blood pressure	0.000368	1	dependent GO term
regulation of blood pressure	0.000368	1	dependent GO term
synaptic transmission	0.000373	0.5	dependent GO term
regulation of ossification	0.000375	1	dependent GO term
growth hormone secretion	0.000377	1	dependent GO term
circadian regulation of gene expression	0.000377	0.5	dependent GO term
intermediate filament organization	0.000377	1	dependent GO term
triglyceride catabolic process	0.000377	1	dependent GO term
regulation of steroid hormone biosynthetic process	0.000377	1	dependent GO term
negative regulation of ion transmembrane transporter activity	0.000377	1	dependent GO term
purinergic receptor signaling pathway	0.000377	0	dependent GO term
membrane repolarization	0.000377	1	dependent GO term
regulation of membrane repolarization	0.000377	1	dependent GO term
cofactor catabolic process	0.000377	1	dependent GO term
postreplication repair	0.000377	0	dependent GO term
response to molecule of bacterial origin	0.000382	0.833333	dependent GO term
positive regulation of response to DNA damage stimulus	0.000384	0.166667	dependent GO term
regulation of cell activation	0.000387	0.333333	independent GO term
positive regulation of cell motility	0.000394	0.65	dependent GO term
macromolecule catabolic process	0.000394	0.333333	dependent GO term
tissue morphogenesis	0.0004	0.75	dependent GO term
regulation of exocytosis	0.000403	0.166667	dependent GO term
vasculature development	0.000423	0.75	dependent GO term
S phase	0.000424	0.5	dependent GO term
positive regulation of acute inflammatory response to antigenic stimulus	0.000428	0.75	dependent GO term
bicarbonate transport	0.000428	0.666667	dependent GO term
regulation of macrophage cytokine production	0.000428	1	dependent GO term
negative regulation of bone resorption	0.000428	1	dependent GO term
bone maturation	0.000428	1	dependent GO term
retrograde transport, vesicle recycling within Golgi	0.000428	0	dependent GO term
atrioventricular valve morphogenesis	0.000428	0.666667	dependent GO term
regulation of protein metabolic process	0.000429	0.65	dependent GO term
cellular macromolecule biosynthetic process	0.000431	0.363636	dependent GO term
branching morphogenesis of an epithelial tube	0.000434	1	dependent GO term
regulation of macromolecule metabolic process	0.000438	0.363636	dependent GO term
positive regulation of biological process	0.000446	0.363636	independent GO term
negative regulation of signal transduction	0.000455	0.666667	dependent GO term
positive regulation of cellular component movement	0.000459	0.65	dependent GO term
labyrinthine layer blood vessel development	0.000474	0.5	dependent GO term
neutral lipid catabolic process	0.000474	1	dependent GO term
acylglycerol catabolic process	0.000474	1	dependent GO term
positive regulation of histone methylation	0.000474	0	dependent GO term
positive regulation of steroid biosynthetic process	0.000474	1	dependent GO term
arachidonic acid secretion	0.000474	1	dependent GO term
intra-Golgi vesicle-mediated transport	0.000474	0	dependent GO term
cellular response to interleukin-6	0.000474	1	dependent GO term
modified amino acid transport	0.000474	0.5	dependent GO term
neuromuscular synaptic transmission	0.000474	0	dependent GO term
lens fiber cell differentiation	0.000474	0.5	dependent GO term
positive regulation of adenylate cyclase activity	0.000474	0.5	dependent GO term
neuromuscular synaptic transmission	0.000474	0	dependent GO term
G-protein coupled receptor signaling pathway	0.000477	0.166667	dependent GO term
tumor necrosis factor production	0.000481	0.833333	dependent GO term
regulation of tumor necrosis factor production	0.000481	0.833333	dependent GO term
positive regulation of cyclic nucleotide metabolic process	0.000481	0.5	dependent GO term
response to virus	0.000481	0	dependent GO term
organic acid catabolic process	0.000481	0.333333	dependent GO term
carboxylic acid catabolic process	0.000481	0.333333	dependent GO term
conditioned taste aversion	0.000485	0.333333	dependent GO term
positive regulation of locomotion	0.000489	0.65	dependent GO term
response to radiation	0.000493	0.333333	dependent GO term
DNA hypermethylation	0.000499	0.666667	dependent GO term
hypermethylation of CpG island	0.000499	0.666667	dependent GO term
response to metal ion	0.000499	0.333333	dependent GO term
protein transport	0.0005	0.65	dependent GO term
histone H4 deacetylation	0.000501	0.166667	dependent GO term
negative regulation of protein activation cascade	0.000501	0.75	dependent GO term
negative regulation of complement activation	0.000501	0.75	dependent GO term
chronic inflammatory response to antigenic stimulus	0.000501	1	dependent GO term
protein phosphorylation	0.000504	0.65	dependent GO term
regulation of purine nucleotide metabolic process	0.000504	0.5	dependent GO term
negative regulation of leukocyte activation	0.000511	0.75	dependent GO term
extrinsic apoptotic signaling pathway	0.000515	0.5	dependent GO term
tumor necrosis factor superfamily cytokine production	0.000523	0.833333	dependent GO term
positive regulation of leukocyte migration	0.000523	1	dependent GO term
regulation of hypersensitivity	0.000523	0.75	dependent GO term
cytokinetic process	0.000523	0.666667	dependent GO term
cranial suture morphogenesis	0.000523	1	dependent GO term
macrophage cytokine production	0.000523	1	dependent GO term
negative regulation of cytokine production involved in immune response	0.000523	1	dependent GO term
cranial suture morphogenesis	0.000523	0	dependent GO term
production of miRNAs involved in gene silencing by miRNA	0.000523	0.333333	dependent GO term
negative regulation of alpha-beta T cell differentiation	0.000523	0.666667	dependent GO term
heart morphogenesis	0.000523	0.666667	dependent GO term
cardiac chamber formation	0.000523	0.666667	dependent GO term
entrainment of circadian clock	0.000523	0.666667	dependent GO term
cardiocyte differentiation	0.000526	0.75	dependent GO term
modulation of growth of symbiont involved in interaction with host	0.000527	0.5	dependent GO term
regulation of growth of symbiont in host	0.000527	0.5	dependent GO term
negative regulation of growth of symbiont involved in interaction with host	0.000527	0.5	dependent GO term
negative regulation of growth of symbiont in host	0.000527	0.5	dependent GO term
aorta morphogenesis	0.000527	0.5	dependent GO term
regulation of anoikis	0.000527	0	dependent GO term
cartilage development involved in endochondral bone morphogenesis	0.000527	0.5	dependent GO term
regulation of necrotic cell death	0.000527	0.5	dependent GO term
trophectodermal cell differentiation	0.000527	0	dependent GO term
synaptic transmission, cholinergic	0.000527	1	dependent GO term
macromolecule biosynthetic process	0.000536	0.363636	dependent GO term
regulation of protein phosphorylation	0.000538	0.5	dependent GO term
DNA damage response, signal transduction by p53 class mediator	0.000539	0.166667	dependent GO term
regulation of nucleotide metabolic process	0.000541	0.5	dependent GO term
positive regulation of catalytic activity	0.000555	0.65	dependent GO term
inner ear development	0.000559	1	dependent GO term
positive regulation of nucleotide metabolic process	0.000567	0.5	dependent GO term
positive regulation of purine nucleotide metabolic process	0.000567	0.5	dependent GO term
spindle assembly checkpoint	0.000582	0.5	dependent GO term
mitotic spindle checkpoint	0.000582	0.5	dependent GO term
protein localization to endoplasmic reticulum	0.000582	0	dependent GO term
disruption of cells of other organism	0.000582	0.5	dependent GO term
killing of cells of other organism	0.000582	0.5	dependent GO term
positive regulation of blood vessel endothelial cell migration	0.000582	1	dependent GO term
acylglycerol homeostasis	0.000582	1	dependent GO term
triglyceride homeostasis	0.000582	1	dependent GO term
regulation of intracellular estrogen receptor signaling pathway	0.000582	0	dependent GO term
renal sodium excretion	0.000582	1	dependent GO term
regulation of renal sodium excretion	0.000582	1	dependent GO term
regulation of cysteine-type endopeptidase activity involved in apoptotic process	0.000586	0.666667	dependent GO term
apoptotic process	0.000593	0.65	dependent GO term
regulation of immune effector process	0.000596	0.666667	dependent GO term
regulation of primary metabolic process	0.000597	0.363636	dependent GO term
negative regulation of cell activation	0.000604	0.75	dependent GO term
negative regulation of signaling	0.000609	0.666667	dependent GO term
regulation of neuron apoptotic process	0.000615	1	dependent GO term
signaling	0.000617	0.65	independent GO term
single organism signaling	0.000617	0.65	dependent GO term
receptor metabolic process	0.00062	0.5	dependent GO term
negative regulation of cell communication	0.000625	0.666667	dependent GO term
lung development	0.000625	1	dependent GO term
regulation of blood volume by renin-angiotensin	0.000627	0.75	dependent GO term
positive regulation of renal sodium excretion	0.000627	0.75	dependent GO term
hypersensitivity	0.000627	0.75	dependent GO term
wound healing, spreading of epidermal cells	0.000627	1	dependent GO term
regulation of release of sequestered calcium ion into cytosol by sarcoplasmic reticulum	0.000627	0.333333	dependent GO term
negative regulation of production of molecular mediator of immune response	0.000627	1	dependent GO term
negative regulation of bone remodeling	0.000627	1	dependent GO term
T-helper 2 cell differentiation	0.000627	0.666667	dependent GO term
atrioventricular valve development	0.000627	0.666667	dependent GO term
cellular response to interferon-beta	0.000627	0	dependent GO term
positive regulation of cell development	0.000634	1	dependent GO term
aorta development	0.00064	0.5	dependent GO term
cellular response to gonadotropin stimulus	0.00064	1	dependent GO term
glomerulus vasculature development	0.00064	1	dependent GO term
positive regulation of tyrosine phosphorylation of Stat3 protein	0.00064	1	dependent GO term
nuclear-transcribed mRNA catabolic process, deadenylation-dependent decay	0.00064	0	dependent GO term
respiratory tube development	0.000644	1	dependent GO term
reproductive process	0.000649	0.8	independent GO term
regulation of cell adhesion	0.000655	0.5	independent GO term
enzyme linked receptor protein signaling pathway	0.000666	0.428571	dependent GO term
synaptic vesicle priming	0.000668	0.5	independent GO term
bundle of His cell to Purkinje myocyte communication	0.000668	0.4	dependent GO term
inner ear receptor cell fate commitment	0.000668	0.75	dependent GO term
auditory receptor cell fate commitment	0.000668	0.75	dependent GO term
negative regulation of glutamate secretion	0.000668	1	dependent GO term
enzyme linked receptor protein signaling pathway	0.000673	0.25	dependent GO term
enzyme linked receptor protein signaling pathway	0.000673	0.75	dependent GO term
programmed cell death	0.000678	0.65	dependent GO term
regulation of cellular metabolic process	0.000678	0.363636	dependent GO term
regulation of cell differentiation	0.000679	0.8	dependent GO term
regulation of cysteine-type endopeptidase activity	0.000685	0.666667	dependent GO term
morphogenesis of a branching epithelium	0.000685	1	dependent GO term
antigen processing and presentation of peptide antigen via MHC class I	0.000701	1	dependent GO term
positive regulation of autophagy	0.000701	0	dependent GO term
regulation of hormone biosynthetic process	0.000701	1	dependent GO term
renal system vasculature development	0.000701	1	dependent GO term
kidney vasculature development	0.000701	1	dependent GO term
genetic imprinting	0.000701	0.5	dependent GO term
response to ATP	0.000701	0	dependent GO term
mammary gland lobule development	0.000701	1	dependent GO term
mammary gland alveolus development	0.000701	1	dependent GO term
DNA catabolic process, endonucleolytic	0.000701	0	dependent GO term
apoptotic DNA fragmentation	0.000701	0	dependent GO term
muscle contraction	0.000706	0.333333	dependent GO term
muscle contraction	0.000706	1	dependent GO term
DNA metabolic process	0.000709	0.166667	dependent GO term
positive regulation of macrophage cytokine production	0.000727	0.833333	dependent GO term
odontogenesis of dentin-containing tooth	0.00074	0.8	dependent GO term
establishment of protein localization	0.000741	0.65	dependent GO term
physiological muscle hypertrophy	0.000741	0.75	dependent GO term
physiological cardiac muscle hypertrophy	0.000741	0.75	dependent GO term
cell growth involved in cardiac muscle cell development	0.000741	0.75	dependent GO term
spindle assembly involved in mitosis	0.000741	0.666667	dependent GO term
craniofacial suture morphogenesis	0.000741	1	dependent GO term
response to laminar fluid shear stress	0.000741	1	dependent GO term
DNA demethylation	0.000741	0.333333	dependent GO term
regulation of transcription from RNA polymerase II promoter involved in heart development	0.000741	1	dependent GO term
craniofacial suture morphogenesis	0.000741	0	dependent GO term
positive regulation of urine volume	0.000741	1	dependent GO term
T-helper 1 cell differentiation	0.000741	0.666667	dependent GO term
cell adhesion	0.000742	0.666667	dependent GO term
MAPK cascade	0.000743	0.65	dependent GO term
epidermal cell differentiation	0.000744	0.75	dependent GO term
exocytosis	0.000749	0.666667	dependent GO term
actin filament organization	0.000749	0	independent GO term
biological adhesion	0.000756	0.666667	independent GO term
anoikis	0.000765	0	dependent GO term
necrotic cell death	0.000765	0.5	dependent GO term
negative regulation of endocytosis	0.000765	0	dependent GO term
regulation of fatty acid transport	0.000765	1	dependent GO term
regulation of excretion	0.000765	1	dependent GO term
membrane hyperpolarization	0.000765	0.5	dependent GO term
autophagic vacuole assembly	0.000765	0	dependent GO term
gene expression	0.000768	0.363636	independent GO term
homophilic cell adhesion	0.000782	0.5	dependent GO term
regulation of neuron death	0.000783	1	dependent GO term
purine ribonucleotide biosynthetic process	0.000794	1	dependent GO term
skeletal system development	0.000809	0.8	dependent GO term
morphogenesis of a branching structure	0.000817	1	dependent GO term
regulation of synaptic plasticity	0.000821	0.25	dependent GO term
transmission of nerve impulse	0.000825	0.5	dependent GO term
transmission of nerve impulse	0.000825	0.25	dependent GO term
regulation of signal transduction	0.000826	0.333333	dependent GO term
regulation of chromosome segregation	0.000832	0.5	independent GO term
growth involved in symbiotic interaction	0.000832	0.5	dependent GO term
growth of symbiont involved in interaction with host	0.000832	0.5	dependent GO term
growth of symbiont in host	0.000832	0.5	dependent GO term
protein localization to chromosome	0.000832	0	dependent GO term
positive regulation of steroid metabolic process	0.000832	1	dependent GO term
negative regulation of transporter activity	0.000832	1	dependent GO term
response to interleukin-6	0.000832	1	independent GO term
positive regulation of calcium-mediated signaling	0.000832	1	dependent GO term
negative regulation of intracellular steroid hormone receptor signaling pathway	0.000832	0	dependent GO term
heat generation	0.000832	1	dependent GO term
stem cell proliferation	0.000841	0.75	dependent GO term
stem cell proliferation	0.000841	0.25	dependent GO term
regulation of phosphorylation	0.000848	0.5	dependent GO term
ear development	0.000853	1	dependent GO term
response to muramyl dipeptide	0.000859	0.75	dependent GO term
pulmonary valve development	0.000859	0.75	dependent GO term
pulmonary valve morphogenesis	0.000859	0.75	dependent GO term
female mating behavior	0.000859	0.5	dependent GO term
regulation of female receptivity	0.000859	0.5	dependent GO term
negative regulation of humoral immune response	0.000859	0.75	dependent GO term
regulation of cAMP-dependent protein kinase activity	0.000859	0.25	dependent GO term
regulation of acute inflammatory response to antigenic stimulus	0.000864	0.75	dependent GO term
positive regulation of inflammatory response to antigenic stimulus	0.000864	0.75	dependent GO term
positive regulation of cytokinesis	0.000864	0.666667	dependent GO term
protein localization to Golgi apparatus	0.000864	0	dependent GO term
positive regulation of viral genome replication	0.000864	0	dependent GO term
positive regulation of CD4-positive, alpha-beta T cell differentiation	0.000864	0.666667	dependent GO term
anaphase-promoting complex-dependent proteasomal ubiquitin-dependent protein catabolic process	0.000864	0.333333	dependent GO term
reproduction	0.000874	0.8	independent GO term
purine nucleotide biosynthetic process	0.000877	1	dependent GO term
cell communication	0.000878	0.65	independent GO term
bone mineralization	0.000884	0.8	dependent GO term
respiratory system development	0.000889	1	dependent GO term
positive regulation of protein metabolic process	0.000897	0.65	dependent GO term
tricarboxylic acid cycle	0.000901	0	independent GO term
protein K11-linked ubiquitination	0.000901	0	dependent GO term
regulation of cardiac muscle cell action potential	0.000901	1	dependent GO term
tricarboxylic acid cycle	0.000901	0	independent GO term
tumor necrosis factor-mediated signaling pathway	0.000901	1	dependent GO term
positive regulation of stress fiber assembly	0.000901	1	dependent GO term
regulation of digestive system process	0.000901	1	dependent GO term
positive regulation of cyclase activity	0.000901	0.5	dependent GO term
heme metabolic process	0.000901	1	dependent GO term
neuron apoptotic process	0.000914	1	dependent GO term
ribonucleotide biosynthetic process	0.00094	1	dependent GO term
regulation of cytokine secretion	0.000946	0.833333	dependent GO term
intracellular signal transduction	0.000953	0.375	dependent GO term
signal transduction in response to DNA damage	0.000963	0.166667	dependent GO term
purine-containing compound biosynthetic process	0.000966	1	dependent GO term
multicellular organismal signaling	0.00097	0.5	dependent GO term
multicellular organismal signaling	0.00097	0.25	dependent GO term
ventricular septum morphogenesis	0.000973	0.5	dependent GO term
RNA stabilization	0.000973	0	dependent GO term
mRNA stabilization	0.000973	0	dependent GO term
organ induction	0.000973	0.5	dependent GO term
cGMP biosynthetic process	0.000973	0	dependent GO term
ephrin receptor signaling pathway	0.000973	0.5	dependent GO term
regulation of tyrosine phosphorylation of Stat3 protein	0.000973	1	dependent GO term
regulation of oligodendrocyte differentiation	0.000973	0.5	dependent GO term
regulation of cardiac muscle cell membrane potential	0.000973	1	dependent GO term
CD4-positive, alpha-beta T cell differentiation involved in immune response	0.000973	1	dependent GO term
T-helper cell differentiation	0.000973	1	dependent GO term
retrograde transport, endosome to Golgi	0.000973	0.5	dependent GO term
cGMP biosynthetic process	0.000973	0	dependent GO term
phenol-containing compound biosynthetic process	0.000973	0.5	dependent GO term
cytosolic calcium ion homeostasis	0.000979	0.333333	dependent GO term
ribose phosphate biosynthetic process	0.000979	1	dependent GO term
epiboly	0.000997	1	dependent GO term
epiboly involved in wound healing	0.000997	1	dependent GO term
wound healing, spreading of cells	0.000997	1	dependent GO term
release of sequestered calcium ion into cytosol by sarcoplasmic reticulum	0.000997	0.333333	dependent GO term
negative regulation of tissue remodeling	0.000997	1	dependent GO term
DNA dealkylation	0.000997	0.333333	dependent GO term
regulation of T-helper cell differentiation	0.000997	0.666667	dependent GO term
cardiac right ventricle morphogenesis	0.000997	0.666667	dependent GO term
intracellular signal transduction	0.00101	0.333333	dependent GO term
DNA repair	0.00101	0.166667	dependent GO term
lipid catabolic process	0.00101	0.333333	dependent GO term
regulation of aldosterone biosynthetic process	0.00102	0.8	dependent GO term
ncRNA metabolic process	0.00102	0	dependent GO term
circulatory system development	0.00103	0.65	dependent GO term
cardiovascular system development	0.00103	0.65	dependent GO term
regulation of cellular response to stress	0.00104	0.333333	dependent GO term
regulation of transcription from RNA polymerase II promoter	0.00104	0.8	dependent GO term
protein catabolic process	0.00105	0.125	dependent GO term
spindle checkpoint	0.00105	0.5	dependent GO term
protein O-linked glycosylation	0.00105	0	dependent GO term
placenta blood vessel development	0.00105	0.5	dependent GO term
nuclear-transcribed mRNA catabolic process, nonsense-mediated decay	0.00105	0	dependent GO term
protein O-linked glycosylation	0.00105	0.5	dependent GO term
positive regulation of acute inflammatory response	0.00105	1	dependent GO term
regulation of synaptic transmission, GABAergic	0.00105	1	dependent GO term
positive regulation of lyase activity	0.00105	0.5	dependent GO term
cell migration	0.00106	0.666667	dependent GO term
trachea morphogenesis	0.00107	0.75	dependent GO term
regulation of osteoblast differentiation	0.00108	0.8	dependent GO term
regulation of localization	0.00109	0.65	independent GO term
pallium development	0.00109	0.75	dependent GO term
single-organism catabolic process	0.00109	0.333333	dependent GO term
small molecule catabolic process	0.00109	0.333333	dependent GO term
skeletal muscle tissue development	0.0011	1	dependent GO term
regulation of response to stress	0.00111	0.75	dependent GO term
histone ubiquitination	0.00113	0.25	dependent GO term
intermediate filament cytoskeleton organization	0.00113	1	dependent GO term
regulation of epidermal cell differentiation	0.00113	0.5	dependent GO term
glycerolipid catabolic process	0.00113	1	dependent GO term
regulation of histone methylation	0.00113	0	dependent GO term
positive regulation of glial cell differentiation	0.00113	0.5	dependent GO term
regulation of organelle assembly	0.00113	0	dependent GO term
T cell differentiation involved in immune response	0.00113	1	dependent GO term
alpha-beta T cell differentiation involved in immune response	0.00113	1	dependent GO term
long-term memory	0.00113	1	dependent GO term
cell death	0.00114	0.65	dependent GO term
regulation of ryanodine-sensitive calcium-release channel activity	0.00114	0.333333	dependent GO term
myeloid leukocyte cytokine production	0.00114	1	dependent GO term
phasic smooth muscle contraction	0.00114	0.666667	dependent GO term
positive regulation of CD4-positive, alpha-beta T cell activation	0.00114	0.666667	dependent GO term
atrial septum development	0.00114	0.666667	dependent GO term
steroid metabolic process	0.00116	0.666667	dependent GO term
death	0.00118	0.65	independent GO term
gland development	0.0012	0.65	dependent GO term
pattern specification process	0.0012	0.363636	dependent GO term
regulation of MAPK cascade	0.0012	0.5	dependent GO term
cellular response to endogenous stimulus	0.0012	0.25	dependent GO term
cellular response to endogenous stimulus	0.0012	0.75	dependent GO term
skeletal muscle organ development	0.0012	1	dependent GO term
protein K63-linked ubiquitination	0.00121	0.25	dependent GO term
positive regulation of cell proliferation	0.00121	0.25	dependent GO term
regulation of calcium ion transmembrane transporter activity	0.00121	0.333333	dependent GO term
response to morphine	0.00121	0.5	dependent GO term
spinal cord motor neuron differentiation	0.00121	0.5	dependent GO term
icosanoid secretion	0.00121	1	dependent GO term
tyrosine phosphorylation of Stat3 protein	0.00121	1	dependent GO term
spinal cord motor neuron differentiation	0.00121	0.5	dependent GO term
intracellular estrogen receptor signaling pathway	0.00121	0	dependent GO term
alpha-beta T cell activation involved in immune response	0.00121	1	dependent GO term
C21-steroid hormone metabolic process	0.00121	0.5	dependent GO term
icosanoid secretion	0.00121	1	dependent GO term
positive regulation of actin filament bundle assembly	0.00121	1	dependent GO term
response to morphine	0.00121	1	dependent GO term
signal transduction by p53 class mediator	0.00122	0.2	dependent GO term
muscle system process	0.00124	0.333333	independent GO term
muscle system process	0.00124	1	independent GO term
negative regulation of response to stimulus	0.00125	0.666667	dependent GO term
microtubule-based process	0.00125	0.6	independent GO term
regulation of multicellular organismal development	0.00126	0.8	dependent GO term
epithelium migration	0.00126	0.75	dependent GO term
epithelial cell migration	0.00126	0.75	dependent GO term
neuron death	0.00127	1	dependent GO term
regulation of norepinephrine secretion	0.00129	0.75	dependent GO term
regulation of systemic arterial blood pressure by circulatory renin-angiotensin	0.00129	0.75	dependent GO term
positive regulation of B cell mediated immunity	0.00129	0.75	dependent GO term
positive regulation of immunoglobulin mediated immune response	0.00129	0.75	dependent GO term
cellular response to insulin stimulus	0.00129	0.75	dependent GO term
morphogenesis of an epithelial bud	0.00129	0.666667	dependent GO term
vascular smooth muscle contraction	0.00129	0.666667	dependent GO term
positive regulation of Ras protein signal transduction	0.00129	0.333333	dependent GO term
negative regulation of alpha-beta T cell activation	0.00129	0.666667	dependent GO term
pericardium development	0.00129	0.666667	dependent GO term
fibrinolysis	0.00129	0.666667	dependent GO term
positive regulation of multicellular organism growth	0.00129	1	dependent GO term
modification by host of symbiont morphology or physiology	0.00129	0.5	dependent GO term
NAD metabolic process	0.00129	0	dependent GO term
insulin-like growth factor receptor signaling pathway	0.00129	1	dependent GO term
regulation of hormone metabolic process	0.00129	1	dependent GO term
response to isoquinoline alkaloid	0.00129	0.5	dependent GO term
blastocyst formation	0.00129	0	dependent GO term
mitotic spindle organization	0.00129	0	dependent GO term
positive regulation of organic acid transport	0.00129	1	dependent GO term
response to isoquinoline alkaloid	0.00129	1	dependent GO term
sodium ion homeostasis	0.00129	1	dependent GO term
production of molecular mediator involved in inflammatory response	0.00129	0.5	independent GO term
regulation of cAMP metabolic process	0.0013	0.5	dependent GO term
regulation of leukocyte migration	0.0013	1	dependent GO term
regulation of synaptic transmission	0.0013	1	dependent GO term
regulation of type I interferon-mediated signaling pathway	0.00131	0.6	dependent GO term
neuronal stem cell maintenance	0.00131	0.75	dependent GO term
distal tubule development	0.00131	0.75	dependent GO term
cardiac conduction system development	0.00131	0.75	dependent GO term
dichotomous subdivision of an epithelial terminal unit	0.00131	0.75	dependent GO term
cranial suture morphogenesis	0.00131	0.25	dependent GO term
pattern specification process	0.00132	0.8	dependent GO term
transcription from RNA polymerase II promoter	0.00133	0.8	dependent GO term
actin filament bundle assembly	0.00134	0.5	dependent GO term
gland development	0.00134	0.5	dependent GO term
mRNA processing	0.00135	0	dependent GO term
modulation by organism of defense response of other organism involved in symbiotic interaction	0.00136	0.833333	dependent GO term
positive regulation by organism of defense response of other organism involved in symbiotic interaction	0.00136	0.833333	dependent GO term
modulation by symbiont of host defense response	0.00136	0.833333	dependent GO term
positive regulation by symbiont of host defense response	0.00136	0.833333	dependent GO term
modulation by organism of immune response of other organism involved in symbiotic interaction	0.00136	0.833333	dependent GO term
modulation by organism of innate immune response in other organism involved in symbiotic interaction	0.00136	0.833333	dependent GO term
pathogen-associated molecular pattern dependent modulation by organism of innate immune response in other organism involved in symbiotic interaction	0.00136	0.833333	dependent GO term
positive regulation by organism of immune response of other organism involved in symbiotic interaction	0.00136	0.833333	dependent GO term
positive regulation by organism of innate immune response in other organism involved in symbiotic interaction	0.00136	0.833333	dependent GO term
pathogen-associated molecular pattern dependent induction by organism of innate immune response of other organism involved in symbiotic interaction	0.00136	0.833333	dependent GO term
modulation by symbiont of host immune response	0.00136	0.833333	dependent GO term
modulation by symbiont of host innate immune response	0.00136	0.833333	dependent GO term
pathogen-associated molecular pattern dependent modulation by symbiont of host innate immune response	0.00136	0.833333	dependent GO term
positive regulation by symbiont of host immune response	0.00136	0.833333	dependent GO term
positive regulation by symbiont of host innate immune response	0.00136	0.833333	dependent GO term
pathogen-associated molecular pattern dependent induction by symbiont of host innate immune response	0.00136	0.833333	dependent GO term
negative regulation of interleukin-17 production	0.00136	0.833333	dependent GO term
positive regulation of myeloid leukocyte cytokine production involved in immune response	0.00136	0.833333	dependent GO term
quaternary ammonium group transport	0.00136	0.333333	dependent GO term
regulation of aldosterone metabolic process	0.00136	0.8	dependent GO term
tissue migration	0.00137	0.75	independent GO term
negative regulation of transcription factor import into nucleus	0.00137	0.5	dependent GO term
neuron fate specification	0.00137	0.5	dependent GO term
microtubule anchoring	0.00137	0.5	dependent GO term
response to pain	0.00137	0	dependent GO term
response to pain	0.00137	1	dependent GO term
regulation of cell migration	0.00138	1	dependent GO term
response to bacterium	0.00139	0.833333	dependent GO term
regulation of proteasomal protein catabolic process	0.0014	0.333333	dependent GO term
DNA damage checkpoint	0.0014	0.166667	dependent GO term
dendrite development	0.00143	0.75	dependent GO term
regulation of cellular catabolic process	0.00144	0.2	dependent GO term
norepinephrine secretion	0.00145	0.75	dependent GO term
sarcoplasmic reticulum calcium ion transport	0.00145	0.333333	dependent GO term
regulation of T-helper 1 type immune response	0.00145	0.666667	dependent GO term
sarcoplasmic reticulum calcium ion transport	0.00145	0.333333	dependent GO term
response to interferon-beta	0.00145	0	independent GO term
cytokine secretion	0.00146	0.833333	dependent GO term
appendage morphogenesis	0.00146	0.25	dependent GO term
limb morphogenesis	0.00146	0.25	dependent GO term
regulation of adenylate cyclase activity	0.00146	0.5	dependent GO term
negative regulation of cyclic nucleotide metabolic process	0.00146	1	dependent GO term
negative regulation of cAMP metabolic process	0.00146	1	dependent GO term
secondary metabolic process	0.00146	0.5	dependent GO term
regulation of apoptotic process	0.0015	0.65	dependent GO term
regulation of body fluid levels	0.0015	1	dependent GO term
rhythmic process	0.0015	0.666667	independent GO term
regulation of protein modification process	0.00151	0.5	dependent GO term
regulation of phosphate metabolic process	0.00153	0.65	dependent GO term
localization of cell	0.00153	0.666667	dependent GO term
cell motility	0.00153	0.666667	dependent GO term
BMP signaling pathway	0.00155	0.6	dependent GO term
calcium ion transport	0.00155	0.333333	dependent GO term
cellular response to organic cyclic compound	0.00155	0.333333	dependent GO term
calcium ion transport	0.00155	0.333333	dependent GO term
response to interleukin-4	0.00156	1	independent GO term
auditory receptor cell differentiation	0.00156	0.5	dependent GO term
fatty acid derivative transport	0.00156	1	dependent GO term
icosanoid transport	0.00156	1	dependent GO term
neuron maturation	0.00156	1	dependent GO term
fatty acid derivative transport	0.00156	1	dependent GO term
icosanoid transport	0.00156	1	dependent GO term
negative regulation of smooth muscle cell proliferation	0.00156	0.5	dependent GO term
lung-associated mesenchyme development	0.00157	0.25	dependent GO term
regulation of cell-cell adhesion involved in gastrulation	0.00157	1	dependent GO term
negative regulation of amino acid transport	0.00157	1	dependent GO term
regulation of heterotypic cell-cell adhesion	0.00157	1	dependent GO term
interferon-alpha production	0.00157	0.75	dependent GO term
regulation of interferon-alpha production	0.00157	0.75	dependent GO term
alcohol metabolic process	0.00157	0.666667	dependent GO term
regulation of phosphorus metabolic process	0.00159	0.65	dependent GO term
ubiquitin-dependent protein catabolic process	0.00161	0.333333	dependent GO term
regulation of cell motility	0.00162	1	dependent GO term
neurological system process involved in regulation of systemic arterial blood pressure	0.00162	0.75	independent GO term
inositol phosphate-mediated signaling	0.00162	0.5	dependent GO term
positive regulation of heart rate	0.00162	1	dependent GO term
negative regulation of JNK cascade	0.00162	0.666667	dependent GO term
SMAD protein import into nucleus	0.00162	1	dependent GO term
positive regulation of microtubule polymerization or depolymerization	0.00162	0.666667	dependent GO term
regulation of osteoblast proliferation	0.00162	1	dependent GO term
regulation of cardiac muscle cell differentiation	0.00162	1	dependent GO term
regulation of urine volume	0.00162	1	dependent GO term
intra-Golgi vesicle-mediated transport	0.00162	0	dependent GO term
regulation of type 2 immune response	0.00162	0.666667	dependent GO term
G-protein coupled receptor signaling pathway, coupled to cyclic nucleotide second messenger	0.00164	0.5	dependent GO term
intermediate filament-based process	0.00165	1	independent GO term
regulation of NF-kappaB import into nucleus	0.00165	0.5	dependent GO term
base-excision repair	0.00165	1	dependent GO term
base-excision repair	0.00165	1	dependent GO term
synaptic transmission, GABAergic	0.00165	1	dependent GO term
phosphorylation	0.00166	0.65	dependent GO term
regulation of immune system process	0.00166	0.75	independent GO term
regulation of immune system process	0.00166	0.75	independent GO term
regulation of Ras protein signal transduction	0.00166	0.666667	dependent GO term
regulation of Golgi inheritance	0.00168	0.5	dependent GO term
cellular catabolic process	0.00168	0.25	dependent GO term
negative regulation of biological process	0.00169	0.65	independent GO term
regulation of programmed cell death	0.00169	0.65	dependent GO term
DNA integrity checkpoint	0.00169	0.166667	dependent GO term
modification-dependent protein catabolic process	0.00172	0.333333	dependent GO term
nucleotide biosynthetic process	0.00172	1	dependent GO term
response to cAMP	0.00173	0.333333	dependent GO term
biomineral tissue development	0.00173	0.8	dependent GO term
response to immune response of other organism involved in symbiotic interaction	0.00174	0.833333	dependent GO term
response to host immune response	0.00174	0.833333	dependent GO term
microglial cell activation involved in immune response	0.00174	0.833333	dependent GO term
positive regulation of dendrite development	0.00174	0.8	dependent GO term
regulation of ketone biosynthetic process	0.00174	0.8	dependent GO term
ADP biosynthetic process	0.00174	0	dependent GO term
regulation of transmission of nerve impulse	0.00174	1	dependent GO term
protein K48-linked ubiquitination	0.00175	0.25	dependent GO term
positive regulation of small GTPase mediated signal transduction	0.00175	0.333333	dependent GO term
cAMP-mediated signaling	0.00175	1	dependent GO term
NF-kappaB import into nucleus	0.00175	0.5	dependent GO term
hair cell differentiation	0.00175	0.5	dependent GO term
regulation of calcium-mediated signaling	0.00175	1	dependent GO term
protein K48-linked ubiquitination	0.00175	0.5	dependent GO term
regulation of stress fiber assembly	0.00175	1	dependent GO term
porphyrin-containing compound metabolic process	0.00175	1	dependent GO term
negative regulation of purine nucleotide metabolic process	0.00175	1	dependent GO term
nucleoside phosphate biosynthetic process	0.00176	1	dependent GO term
modification-dependent macromolecule catabolic process	0.00178	0.333333	dependent GO term
appendage development	0.0018	0.166667	dependent GO term
limb development	0.0018	0.166667	dependent GO term
regulation of Rho protein signal transduction	0.0018	0.25	dependent GO term
appendage development	0.0018	0.25	dependent GO term
limb development	0.0018	0.25	dependent GO term
negative regulation of T cell differentiation	0.0018	0.666667	dependent GO term
intracellular steroid hormone receptor signaling pathway	0.00181	0.5	dependent GO term
immune response	0.00182	0.75	dependent GO term
immune response	0.00182	0.75	dependent GO term
immune response	0.00182	0.75	dependent GO term
divalent metal ion transport	0.00184	0.333333	dependent GO term
divalent metal ion transport	0.00184	0.333333	dependent GO term
mitotic cell cycle	0.00185	0.333333	dependent GO term
interaction with symbiont	0.00185	0.5	dependent GO term
regulation of mRNA stability	0.00185	0	dependent GO term
specification of organ identity	0.00185	0.5	dependent GO term
leukocyte cell-cell adhesion	0.00185	1	dependent GO term
response to food	0.00185	0.5	independent GO term
positive regulation of interferon-gamma production	0.00185	1	dependent GO term
DNA catabolic process	0.00185	0	dependent GO term
pigment biosynthetic process	0.00185	0.5	dependent GO term
positive regulation of CREB transcription factor activity	0.00186	0.75	dependent GO term
regulation of protein activation cascade	0.00186	0.75	dependent GO term
regulation of complement activation	0.00186	0.75	dependent GO term
craniofacial suture morphogenesis	0.00186	0.25	dependent GO term
cell-cell adhesion involved in gastrulation	0.00186	1	dependent GO term
regulation of endopeptidase activity	0.0019	0.666667	dependent GO term
divalent inorganic cation transport	0.0019	0.333333	dependent GO term
divalent inorganic cation transport	0.0019	0.333333	dependent GO term
B cell activation	0.00191	0.75	dependent GO term
B cell activation	0.00191	0.75	dependent GO term
positive regulation of signal transduction	0.00192	0.65	dependent GO term
nucleobase-containing compound metabolic process	0.00192	0.363636	dependent GO term
organelle assembly	0.00194	0.666667	independent GO term
complement activation	0.00195	0.666667	dependent GO term
cochlea development	0.00195	0.5	dependent GO term
potassium ion transmembrane transport	0.00195	1	dependent GO term
potassium ion transmembrane transport	0.00195	1	dependent GO term
potassium ion transmembrane transport	0.00195	1	dependent GO term
positive regulation of lipid transport	0.00195	1	dependent GO term
striated muscle cell differentiation	0.00196	1	dependent GO term
protein processing	0.00198	0.6	dependent GO term
regulation of apoptotic signaling pathway	0.00198	0.5	dependent GO term
embryonic organ morphogenesis	0.00198	0	dependent GO term
norepinephrine transport	0.00199	0.75	dependent GO term
renal sodium excretion	0.00199	0.75	dependent GO term
regulation of renal sodium excretion	0.00199	0.75	dependent GO term
acute inflammatory response to antigenic stimulus	0.00199	0.75	dependent GO term
post-anal tail morphogenesis	0.00199	0.25	dependent GO term
positive regulation of transforming growth factor beta receptor signaling pathway	0.00199	0.333333	dependent GO term
chemokine-mediated signaling pathway	0.00199	1	dependent GO term
regulation of platelet activation	0.00199	1	dependent GO term
positive regulation of cardiac muscle cell proliferation	0.00199	0.666667	dependent GO term
regulation of signaling	0.00201	0.333333	independent GO term
regulation of cell communication	0.00203	0.333333	independent GO term
positive regulation of protein phosphorylation	0.00203	0.8	dependent GO term
Golgi vesicle transport	0.00204	0.2	dependent GO term
regulation of blood vessel endothelial cell migration	0.00205	1	dependent GO term
cellular potassium ion transport	0.00205	1	dependent GO term
regulation of blood vessel endothelial cell migration	0.00205	1	dependent GO term
cellular potassium ion transport	0.00205	1	dependent GO term
regulation of organ formation	0.00205	0.5	dependent GO term
fatty acid derivative biosynthetic process	0.00205	1	dependent GO term
icosanoid biosynthetic process	0.00205	1	dependent GO term
positive regulation of tyrosine phosphorylation of STAT protein	0.00205	1	dependent GO term
CD4-positive, alpha-beta T cell differentiation	0.00205	0.5	dependent GO term
synaptic vesicle exocytosis	0.00205	1	dependent GO term
cellular potassium ion transport	0.00205	1	dependent GO term
CD4-positive, alpha-beta T cell differentiation	0.00205	1	dependent GO term
apoptotic nuclear changes	0.00205	0	dependent GO term
DNA biosynthetic process	0.00205	0	dependent GO term
response to inorganic substance	0.00206	0.333333	independent GO term
immune system process	0.00206	0.333333	independent GO term
regulation of neurogenesis	0.00206	0.8	dependent GO term
cellular calcium ion homeostasis	0.00206	0.333333	dependent GO term
DNA metabolic process	0.00208	0	dependent GO term
odontogenesis	0.00209	0.8	dependent GO term
aging	0.00211	1	dependent GO term
fatty acid metabolic process	0.00211	0.333333	dependent GO term
vesicle-mediated transport	0.00212	0	dependent GO term
vesicle-mediated transport	0.00212	0.5	dependent GO term
vesicle-mediated transport	0.00212	0	dependent GO term
positive regulation of cellular component organization	0.00213	0.65	dependent GO term
monovalent inorganic cation transport	0.00213	1	dependent GO term
apoptotic process	0.00214	0.833333	dependent GO term
positive regulation of Ras GTPase activity	0.00215	0.5	dependent GO term
regulation of cell cycle process	0.00216	0.65	dependent GO term
cell adhesion	0.00216	0.5	dependent GO term
branching morphogenesis of an epithelial tube	0.00216	0.75	dependent GO term
developmental induction	0.00216	0.666667	dependent GO term
hormone-mediated signaling pathway	0.00216	1	dependent GO term
aerobic respiration	0.00216	0	dependent GO term
positive regulation of endothelial cell migration	0.00216	1	dependent GO term
ventral spinal cord development	0.00216	0.5	dependent GO term
developmental induction	0.00216	0.5	dependent GO term
ventral spinal cord development	0.00216	0.5	dependent GO term
aerobic respiration	0.00216	0	dependent GO term
negative regulation of nucleotide metabolic process	0.00216	1	dependent GO term
regulation of ventricular cardiac muscle cell action potential	0.00217	0.4	dependent GO term
response to fungicide	0.00217	0.5	dependent GO term
negative regulation of B cell proliferation	0.00217	0.75	dependent GO term
regulation of protein localization to cell surface	0.00217	0.75	dependent GO term
regulation of macrophage cytokine production	0.00218	0.833333	dependent GO term
positive regulation of tumor necrosis factor biosynthetic process	0.00218	0.833333	dependent GO term
purine nucleoside diphosphate biosynthetic process	0.00218	0	dependent GO term
purine ribonucleoside diphosphate biosynthetic process	0.00218	0	dependent GO term
positive regulation of branching involved in ureteric bud morphogenesis	0.00219	0.75	dependent GO term
biological adhesion	0.00219	0.5	independent GO term
phagocytosis, engulfment	0.00219	0.75	dependent GO term
gene silencing by miRNA	0.00219	0.333333	dependent GO term
cellular response to gonadotropin stimulus	0.00219	0.666667	dependent GO term
glomerulus vasculature development	0.00219	1	dependent GO term
regulation of CD4-positive, alpha-beta T cell differentiation	0.00219	0.666667	dependent GO term
regulation of metabolic process	0.0022	0.363636	independent GO term
regulation of locomotion	0.0022	1	independent GO term
cell proliferation	0.00222	0.8	independent GO term
synaptic transmission	0.00222	0.8	dependent GO term
synaptic transmission	0.00222	0.6	dependent GO term
negative regulation of cell adhesion	0.00223	0.666667	dependent GO term
cytokine-mediated signaling pathway	0.00224	0.5	dependent GO term
cytokine-mediated signaling pathway	0.00224	1	dependent GO term
regulation of nuclear division	0.00225	0.65	dependent GO term
regulation of mitosis	0.00225	0.65	dependent GO term
MAPK cascade	0.00227	0.5	dependent GO term
cell-cell signaling	0.00227	0.5	dependent GO term
regulation of peptidase activity	0.00227	0.666667	dependent GO term
antigen processing and presentation of peptide antigen	0.00227	1	dependent GO term
T cell activation	0.00227	1	dependent GO term
cell-cell signaling involved in cell fate commitment	0.00227	0.666667	dependent GO term
ventricular septum development	0.00227	0.5	dependent GO term
regulation of RNA stability	0.00227	0	dependent GO term
regulation of interleukin-2 production	0.00227	1	dependent GO term
positive regulation of histone modification	0.00227	0	dependent GO term
cell-cell signaling involved in cell fate commitment	0.00227	0.5	dependent GO term
unsaturated fatty acid biosynthetic process	0.00227	1	dependent GO term
RNA export from nucleus	0.00227	0	dependent GO term
T cell activation involved in immune response	0.00227	1	dependent GO term
temperature homeostasis	0.00227	1	dependent GO term
regulation of cyclase activity	0.00227	0.5	dependent GO term
RNA export from nucleus	0.00227	0	dependent GO term
circulatory system development	0.00229	0.75	dependent GO term
cardiovascular system development	0.00229	0.75	dependent GO term
regulation of neurological system process	0.00229	1	dependent GO term
programmed cell death	0.0023	0.833333	dependent GO term
regulation of leukocyte activation	0.00231	0.666667	dependent GO term
negative regulation of cardiac muscle hypertrophy	0.00233	0.666667	dependent GO term
seminiferous tubule development	0.00233	0.333333	dependent GO term
positive regulation of intracellular estrogen receptor signaling pathway	0.00233	0.5	dependent GO term
positive regulation of phosphorylation	0.00233	0.8	dependent GO term
calcium ion homeostasis	0.00234	0.333333	dependent GO term
growth	0.00235	1	independent GO term
wound healing	0.00236	1	dependent GO term
wound healing	0.00236	1	dependent GO term
cholesterol metabolic process	0.00238	1	dependent GO term
DNA repair	0.00238	0	dependent GO term
adenylate cyclase-activating G-protein coupled receptor signaling pathway	0.00239	1	dependent GO term
mast cell activation	0.00239	0.5	dependent GO term
regulation of potassium ion transport	0.00239	1	dependent GO term
cGMP metabolic process	0.00239	0	dependent GO term
telomere maintenance	0.00239	0	dependent GO term
positive regulation of actin filament polymerization	0.00239	1	dependent GO term
CD4-positive, alpha-beta T cell activation	0.00239	0.5	dependent GO term
positive regulation of gliogenesis	0.00239	0.5	dependent GO term
CD4-positive, alpha-beta T cell activation	0.00239	1	dependent GO term
cGMP metabolic process	0.00239	0	dependent GO term
proteolysis	0.0024	0.333333	dependent GO term
neurotrophin TRK receptor signaling pathway	0.0024	0.75	dependent GO term
antigen processing and presentation of peptide antigen via MHC class I	0.0024	0.75	dependent GO term
antigen processing and presentation of exogenous peptide antigen	0.0024	0.75	dependent GO term
replacement ossification	0.0024	1	dependent GO term
endochondral ossification	0.0024	1	dependent GO term
regulation of activin receptor signaling pathway	0.0024	0.666667	dependent GO term
negative regulation of stress-activated protein kinase signaling cascade	0.0024	0.666667	dependent GO term
negative regulation of stress-activated MAPK cascade	0.0024	0.666667	dependent GO term
renal system vasculature development	0.0024	1	dependent GO term
kidney vasculature development	0.0024	1	dependent GO term
type 2 immune response	0.0024	0.666667	dependent GO term
mRNA metabolic process	0.00241	0	dependent GO term
mRNA metabolic process	0.00241	0.333333	dependent GO term
integrin-mediated signaling pathway	0.00242	0.428571	dependent GO term
regulation of cyclic nucleotide metabolic process	0.00243	0.5	dependent GO term
cAMP metabolic process	0.00243	0.5	dependent GO term
protein maturation	0.00243	0.6	dependent GO term
cellular divalent inorganic cation homeostasis	0.00246	0.333333	dependent GO term
localization	0.00249	0.65	independent GO term
leukocyte activation	0.0025	0.333333	dependent GO term
regulation of cellular component movement	0.0025	1	dependent GO term
regulation of small GTPase mediated signal transduction	0.0025	0.666667	dependent GO term
protein activation cascade	0.0025	0.666667	dependent GO term
regulation of Notch signaling pathway	0.0025	0.5	dependent GO term
regulation of epidermis development	0.0025	0.5	dependent GO term
endochondral bone morphogenesis	0.0025	0.5	dependent GO term
telomere organization	0.0025	0	independent GO term
regulation of actin filament bundle assembly	0.0025	1	dependent GO term
tetrapyrrole metabolic process	0.0025	1	dependent GO term
cellular response to type I interferon	0.00251	0.6	dependent GO term
positive regulation of dendritic spine development	0.00251	0.75	dependent GO term
cerebral cortex radial glia guided migration	0.00251	0.75	dependent GO term
trachea development	0.00251	0.75	dependent GO term
cardiac right ventricle morphogenesis	0.00251	0.75	dependent GO term
heterotypic cell-cell adhesion	0.00251	1	dependent GO term
nucleocytoplasmic transport	0.00253	0.333333	dependent GO term
defense response	0.00256	0.75	dependent GO term
defense response	0.00256	0.75	dependent GO term
epithelial tube morphogenesis	0.00258	1	dependent GO term
epithelial tube morphogenesis	0.00258	0	dependent GO term
signal release	0.00258	0.666667	dependent GO term
regulation of cell death	0.00259	0.65	independent GO term
protein modification process	0.00259	0.333333	dependent GO term
cellular protein modification process	0.00259	0.333333	dependent GO term
heterocycle metabolic process	0.0026	0.363636	independent GO term
regulation of catabolic process	0.0026	0.2	dependent GO term
organic substance catabolic process	0.00261	0.25	dependent GO term
regulation of branching involved in ureteric bud morphogenesis	0.00262	0.75	dependent GO term
regulation of excretion	0.00262	0.75	dependent GO term
renal system process involved in regulation of systemic arterial blood pressure	0.00262	0.75	dependent GO term
regulation of inflammatory response to antigenic stimulus	0.00262	0.75	dependent GO term
membrane invagination	0.00262	0.75	dependent GO term
osteoblast proliferation	0.00262	1	dependent GO term
renal system process involved in regulation of systemic arterial blood pressure	0.00262	1	dependent GO term
glutathione metabolic process	0.00262	1	dependent GO term
thyroid gland development	0.00262	0.666667	dependent GO term
regulation of CD4-positive, alpha-beta T cell activation	0.00262	0.666667	dependent GO term
heart valve morphogenesis	0.00262	0.666667	dependent GO term
chronic inflammatory response	0.00262	0.666667	dependent GO term
defense response to Gram-positive bacterium	0.00262	0.5	dependent GO term
cardiac septum morphogenesis	0.00262	0.5	dependent GO term
transcription initiation from RNA polymerase II promoter	0.00262	0	dependent GO term
long-chain fatty acid transport	0.00262	1	dependent GO term
regulation of lyase activity	0.00262	0.5	dependent GO term
epithelium development	0.00263	0.75	dependent GO term
tissue development	0.00264	0.8	dependent GO term
cellular response to stimulus	0.00266	0.65	independent GO term
response to host	0.00267	0.833333	dependent GO term
response to defenses of other organism involved in symbiotic interaction	0.00267	0.833333	dependent GO term
response to host defenses	0.00267	0.833333	dependent GO term
macrophage cytokine production	0.00267	0.833333	dependent GO term
aldosterone biosynthetic process	0.00267	0.8	dependent GO term
type B pancreatic cell development	0.00267	0.8	dependent GO term
ribonucleoside diphosphate biosynthetic process	0.00267	0	dependent GO term
ADP metabolic process	0.00267	0	dependent GO term
interferon-gamma-mediated signaling pathway	0.00267	0.6	dependent GO term
nuclear transport	0.00268	0.333333	dependent GO term
adenylate cyclase-modulating G-protein coupled receptor signaling pathway	0.0027	0.166667	dependent GO term
regulation of MAP kinase activity	0.00274	0.5	dependent GO term
chromosome segregation	0.00274	0.4	independent GO term
blood coagulation	0.00274	1	dependent GO term
macroautophagy	0.00274	0	dependent GO term
cyclic-nucleotide-mediated signaling	0.00274	1	dependent GO term
labyrinthine layer development	0.00274	0.5	dependent GO term
smooth muscle cell differentiation	0.00274	0.5	dependent GO term
positive chemotaxis	0.00274	1	dependent GO term
recombinational repair	0.00274	1	dependent GO term
double-strand break repair via homologous recombination	0.00274	1	dependent GO term
positive regulation of ossification	0.00274	1	dependent GO term
stress fiber assembly	0.00274	1	dependent GO term
macroautophagy	0.00274	0	dependent GO term
cellular component disassembly involved in execution phase of apoptosis	0.00274	0	dependent GO term
cellular aromatic compound metabolic process	0.00275	0.363636	independent GO term
cellular biosynthetic process	0.00278	0.363636	dependent GO term
signal transduction by p53 class mediator	0.00279	0.166667	dependent GO term
response to toxic substance	0.00279	0.5	independent GO term
Rho protein signal transduction	0.00279	0.25	dependent GO term
inner ear development	0.00279	0.75	dependent GO term
positive regulation of epithelial cell proliferation	0.0028	0.8	dependent GO term
endocrine system development	0.0028	0.8	dependent GO term
ossification	0.00281	1	independent GO term
divalent inorganic cation homeostasis	0.00281	0.333333	dependent GO term
ossification	0.00281	1	independent GO term
cellular response to peptide hormone stimulus	0.00283	0.75	dependent GO term
cellular response to abiotic stimulus	0.00283	0.75	dependent GO term
stem cell development	0.00285	0.363636	dependent GO term
neurotrophin signaling pathway	0.00285	0.75	dependent GO term
regulation of microtubule polymerization	0.00285	0.25	dependent GO term
positive regulation of epithelial to mesenchymal transition	0.00285	1	dependent GO term
regulation of microtubule polymerization	0.00285	0.666667	dependent GO term
monocyte chemotaxis	0.00285	1	dependent GO term
leukotriene metabolic process	0.00285	0.333333	dependent GO term
protein phosphorylation	0.00286	0.5	dependent GO term
protein phosphorylation	0.00286	0.333333	dependent GO term
negative regulation of protein processing	0.00286	0.75	dependent GO term
fever generation	0.00286	1	dependent GO term
organic substance transport	0.00287	0.65	dependent GO term
sterol metabolic process	0.00287	1	dependent GO term
cellular response to lipopolysaccharide	0.00287	0.833333	dependent GO term
hemostasis	0.00287	1	dependent GO term
excretion	0.00287	1	independent GO term
excretion	0.00287	1	independent GO term
excretion	0.00287	0	independent GO term
ribosomal small subunit biogenesis	0.00287	0	independent GO term
phosphate-containing compound metabolic process	0.00288	0.333333	dependent GO term
learning or memory	0.00288	0.5	dependent GO term
cell migration	0.00288	0.75	dependent GO term
regulation of cell activation	0.00289	0.666667	independent GO term
lymphocyte proliferation	0.00292	0.75	dependent GO term
cellular response to cytokine stimulus	0.00292	0	dependent GO term
mammary gland lobule development	0.00293	0.65	dependent GO term
mammary gland alveolus development	0.00293	0.65	dependent GO term
coagulation	0.00294	1	independent GO term
gland development	0.00295	0.333333	dependent GO term
mononuclear cell proliferation	0.00297	0.75	dependent GO term
negative regulation of muscle hypertrophy	0.00299	0.666667	dependent GO term
replicative senescence	0.00299	0.166667	dependent GO term
pituitary gland development	0.003	1	dependent GO term
interleukin-2 production	0.003	1	dependent GO term
pituitary gland development	0.003	0.5	dependent GO term
regulation of tyrosine phosphorylation of STAT protein	0.003	1	dependent GO term
homotypic cell-cell adhesion	0.003	1	dependent GO term
RNA 3'-end processing	0.003	0	dependent GO term
negative regulation of RNA metabolic process	0.00301	0.166667	dependent GO term
positive regulation of GTPase activity	0.00301	0.2	dependent GO term
negative regulation of RNA metabolic process	0.00301	0.25	dependent GO term
cell death	0.00304	0.833333	dependent GO term
tube morphogenesis	0.00306	1	dependent GO term
tube morphogenesis	0.00306	0	dependent GO term
tube morphogenesis	0.00306	0.666667	dependent GO term
death	0.00309	0.833333	independent GO term
positive regulation of heart contraction	0.00309	1	dependent GO term
regulation of cardiac muscle hypertrophy	0.00309	1	dependent GO term
melanocyte differentiation	0.00309	0.666667	dependent GO term
heart valve development	0.00309	0.666667	dependent GO term
protein K11-linked ubiquitination	0.00309	0.333333	dependent GO term
positive regulation of signaling	0.0031	0.65	dependent GO term
DNA conformation change	0.00311	0	dependent GO term
negative regulation of immune system process	0.00311	0.75	dependent GO term
activation of immune response	0.00311	0.75	dependent GO term
negative regulation of protein import into nucleus	0.00313	0.5	dependent GO term
artery morphogenesis	0.00313	0.5	dependent GO term
histone deacetylation	0.00313	1	dependent GO term
regulation of plasma lipoprotein particle levels	0.00313	1	independent GO term
regulation of intracellular steroid hormone receptor signaling pathway	0.00313	0	dependent GO term
acute-phase response	0.00313	1	dependent GO term
regulation of smooth muscle contraction	0.00313	0	dependent GO term
Ras protein signal transduction	0.00314	0.666667	dependent GO term
maternal process involved in female pregnancy	0.00315	0.3	dependent GO term
positive regulation of cell communication	0.00316	0.65	dependent GO term
organic substance biosynthetic process	0.00316	0.363636	dependent GO term
I-kappaB phosphorylation	0.0032	0.833333	dependent GO term
positive regulation of nitric-oxide synthase biosynthetic process	0.0032	0.833333	dependent GO term
organic cation transport	0.0032	0.333333	dependent GO term
mineralocorticoid biosynthetic process	0.0032	0.8	dependent GO term
aldosterone metabolic process	0.0032	0.8	dependent GO term
cellular response to interferon-beta	0.0032	0.6	dependent GO term
regulation of nervous system development	0.00321	0.8	dependent GO term
macromolecule modification	0.00323	0.333333	independent GO term
response to type I interferon	0.00324	0.6	independent GO term
regulation of dendritic spine morphogenesis	0.00324	0.75	dependent GO term
epithelial cell fate commitment	0.00324	0.75	dependent GO term
inactivation of MAPK activity	0.00324	0.75	dependent GO term
induction of positive chemotaxis	0.00324	0.75	dependent GO term
vesicle targeting	0.00324	0	independent GO term
phosphorus metabolic process	0.00326	0.333333	independent GO term
positive regulation of chromosome organization	0.00326	0	dependent GO term
cell differentiation in spinal cord	0.00326	0.5	dependent GO term
positive regulation of axonogenesis	0.00326	0	dependent GO term
positive regulation of chromosome organization	0.00326	0	dependent GO term
cell differentiation in spinal cord	0.00326	0.5	dependent GO term
regulation of translational initiation	0.00326	0	dependent GO term
response to organophosphorus	0.00329	0.333333	independent GO term
cellular process involved in reproduction	0.0033	0.5	independent GO term
positive regulation of cytokine production	0.00331	0.75	dependent GO term
positive regulation of molecular function	0.00332	0.65	dependent GO term
negative regulation of MAP kinase activity	0.00332	0.5	dependent GO term
regulation of response to DNA damage stimulus	0.00333	0.166667	dependent GO term
histone H3-K4 methylation	0.00333	0	dependent GO term
regulation of systemic arterial blood pressure by renin-angiotensin	0.00333	0.75	dependent GO term
morphogenesis of an epithelial fold	0.00333	0.666667	dependent GO term
regulation of muscle hypertrophy	0.00333	1	dependent GO term
cGMP biosynthetic process	0.00333	1	dependent GO term
regulation of fatty acid biosynthetic process	0.00333	0.666667	dependent GO term
CD4-positive, alpha-beta T cell differentiation involved in immune response	0.00333	0.666667	dependent GO term
T-helper cell differentiation	0.00333	0.666667	dependent GO term
leukocyte proliferation	0.00336	0.75	dependent GO term
ubiquitin-dependent protein catabolic process	0.00338	0.333333	dependent GO term
lipid storage	0.0034	1	dependent GO term
pigment metabolic process	0.0034	1	dependent GO term
pigment metabolic process	0.0034	0.5	dependent GO term
cellular response to peptide	0.00341	0.75	dependent GO term
cellular nitrogen compound metabolic process	0.00342	0.363636	dependent GO term
regulation of protein secretion	0.00344	0.833333	dependent GO term
locomotion	0.00345	0.666667	independent GO term
regulation of response to stimulus	0.00346	0.333333	independent GO term
cognition	0.00347	0.5	independent GO term
regulation of catalytic activity	0.0035	0.65	dependent GO term
placenta development	0.00351	0	dependent GO term
anatomical structure formation involved in morphogenesis	0.00352	0.75	dependent GO term
response to mechanical stimulus	0.00352	0.75	dependent GO term
acid secretion	0.00353	1	dependent GO term
regulation of glial cell differentiation	0.00353	0.5	dependent GO term
positive regulation of JUN kinase activity	0.00353	1	dependent GO term
regulation of developmental process	0.00354	0.8	independent GO term
regulation of MAP kinase activity	0.00355	0.65	dependent GO term
modification-dependent protein catabolic process	0.00356	0.333333	dependent GO term
regulation of extrinsic apoptotic signaling pathway via death domain receptors	0.00359	0.5	dependent GO term
regulation of myeloid leukocyte mediated immunity	0.00359	0.75	dependent GO term
positive regulation of acute inflammatory response	0.00359	0.75	dependent GO term
regulation of skeletal muscle cell differentiation	0.00359	1	dependent GO term
response to fluid shear stress	0.00359	1	dependent GO term
negative regulation of homeostatic process	0.00359	1	dependent GO term
glutamate secretion	0.00359	1	dependent GO term
lung epithelial cell differentiation	0.00359	0.666667	dependent GO term
positive regulation of alpha-beta T cell differentiation	0.00359	0.666667	dependent GO term
endocardial cushion development	0.00359	0.666667	dependent GO term
mRNA export from nucleus	0.00359	0.333333	dependent GO term
regulation of heart rate by cardiac conduction	0.00365	0.4	dependent GO term
midgut development	0.00365	0.75	dependent GO term
interleukin-2 biosynthetic process	0.00365	1	dependent GO term
cellular response to nitrogen compound	0.00366	0.333333	dependent GO term
modification-dependent macromolecule catabolic process	0.00366	0.333333	dependent GO term
biosynthetic process	0.00367	0.363636	independent GO term
telencephalon development	0.00368	0.75	dependent GO term
phospholipase C-activating G-protein coupled receptor signaling pathway	0.00368	0.666667	dependent GO term
regulation of autophagy	0.00368	0	dependent GO term
regulation of cardiac muscle tissue development	0.00368	0.333333	dependent GO term
positive regulation of JAK-STAT cascade	0.00368	1	dependent GO term
tyrosine phosphorylation of STAT protein	0.00368	1	dependent GO term
regulation of organic acid transport	0.00368	1	dependent GO term
response to nicotine	0.00368	0	dependent GO term
phospholipase C-activating G-protein coupled receptor signaling pathway	0.00368	1	dependent GO term
cellular response to stress	0.00371	0.166667	dependent GO term
G-protein coupled receptor signaling pathway, coupled to cyclic nucleotide second messenger	0.00373	0.166667	dependent GO term
exocytosis	0.00373	0.166667	dependent GO term
epidermis development	0.00373	0.75	dependent GO term
muscle cell differentiation	0.00375	1	dependent GO term
posttranscriptional regulation of gene expression	0.00375	0.333333	dependent GO term
microglial cell activation	0.00378	0.833333	dependent GO term
mineralocorticoid metabolic process	0.00378	0.8	dependent GO term
glandular epithelial cell development	0.00378	0.8	dependent GO term
regulation of neurotransmitter levels	0.00382	0.8	dependent GO term
positive regulation of hydrolase activity	0.00382	0.666667	dependent GO term
positive regulation of hydrolase activity	0.00382	0.333333	dependent GO term
organic hydroxy compound metabolic process	0.00382	0.666667	independent GO term
inner ear receptor cell differentiation	0.00382	0.5	dependent GO term
glomerulus development	0.00382	1	dependent GO term
regulation of acute inflammatory response	0.00382	1	dependent GO term
B cell receptor signaling pathway	0.00385	1	dependent GO term
antigen processing and presentation of exogenous antigen	0.00385	0.75	dependent GO term
regulation of cytokinesis	0.00385	0.666667	dependent GO term
lung cell differentiation	0.00385	0.666667	dependent GO term
T cell differentiation involved in immune response	0.00385	0.666667	dependent GO term
alpha-beta T cell differentiation involved in immune response	0.00385	0.666667	dependent GO term
cardiac atrium development	0.00385	0.666667	dependent GO term
transmembrane receptor protein serine/threonine kinase signaling pathway	0.00387	0.272727	dependent GO term
localization of cell	0.00387	0.75	dependent GO term
cell motility	0.00387	0.75	dependent GO term
organic cyclic compound metabolic process	0.00388	0.363636	independent GO term
transmembrane receptor protein tyrosine kinase signaling pathway	0.00388	0.25	dependent GO term
transmembrane receptor protein tyrosine kinase signaling pathway	0.00388	0	dependent GO term
intracellular protein transport	0.00389	0.6	dependent GO term
osteoblast differentiation	0.00391	0.8	dependent GO term
osteoblast differentiation	0.00391	0.6	dependent GO term
cellular amino acid metabolic process	0.00395	0	dependent GO term
regulation of cell morphogenesis involved in differentiation	0.00396	0.75	dependent GO term
regulation of dendrite morphogenesis	0.00397	0	dependent GO term
negative regulation of nucleocytoplasmic transport	0.00397	0.5	dependent GO term
toll-like receptor signaling pathway	0.00397	1	dependent GO term
histone lysine methylation	0.00397	0	dependent GO term
positive regulation of DNA replication	0.00397	0	dependent GO term
blood circulation	0.00398	1	dependent GO term
axonogenesis	0.00398	1	dependent GO term
blood circulation	0.00398	1	dependent GO term
blood circulation	0.00398	1	dependent GO term
membrane organization	0.00398	0	independent GO term
negative regulation of cellular macromolecule biosynthetic process	0.00399	0.166667	dependent GO term
negative regulation of cellular macromolecule biosynthetic process	0.00399	0.25	dependent GO term
circulatory system process	0.00402	1	independent GO term
circulatory system process	0.00402	1	independent GO term
circulatory system process	0.00402	1	independent GO term
negative regulation of gene expression	0.00403	0.166667	dependent GO term
negative regulation of gene expression	0.00403	0.25	dependent GO term
multicellular organismal reproductive behavior	0.00408	0.5	dependent GO term
positive regulation of activated T cell proliferation	0.00408	1	dependent GO term
positive regulation of multicellular organismal process	0.00411	0.8	dependent GO term
positive regulation of cAMP biosynthetic process	0.00412	1	dependent GO term
protein targeting to membrane	0.00412	0	dependent GO term
artery development	0.00412	0.5	dependent GO term
outflow tract morphogenesis	0.00412	0.5	dependent GO term
pyridine nucleotide metabolic process	0.00412	0	dependent GO term
nicotinamide nucleotide metabolic process	0.00412	0	dependent GO term
fibroblast growth factor receptor signaling pathway	0.00412	0.5	dependent GO term
protein targeting to membrane	0.00412	0.5	dependent GO term
regulation of alpha-beta T cell activation	0.00412	1	dependent GO term
positive regulation of cAMP biosynthetic process	0.00412	0.5	dependent GO term
nucleic acid phosphodiester bond hydrolysis	0.00412	0	dependent GO term
nucleic acid phosphodiester bond hydrolysis	0.00412	0	dependent GO term
anterior/posterior pattern specification	0.00413	0.25	dependent GO term
microtubule polymerization	0.00413	0.25	dependent GO term
regulation of calcium ion transmembrane transporter activity	0.00413	0.333333	dependent GO term
regulation of bone resorption	0.00413	1	dependent GO term
microtubule polymerization	0.00413	0.666667	dependent GO term
pigment cell differentiation	0.00413	0.666667	dependent GO term
positive regulation of viral process	0.00413	0	dependent GO term
alpha-beta T cell activation involved in immune response	0.00413	0.666667	dependent GO term
negative regulation of lymphocyte differentiation	0.00413	0.666667	dependent GO term
regulation of early endosome to late endosome transport	0.00419	0.5	dependent GO term
positive regulation of phosphorus metabolic process	0.00419	0.8	dependent GO term
positive regulation of phosphate metabolic process	0.00419	0.8	dependent GO term
muscle organ development	0.00419	1	dependent GO term
ear development	0.00425	0.75	dependent GO term
cellular response to growth factor stimulus	0.00426	0.25	dependent GO term
cellular response to growth factor stimulus	0.00426	1	dependent GO term
negative regulation of NF-kappaB transcription factor activity	0.00427	1	dependent GO term
positive regulation of lipid biosynthetic process	0.00427	1	dependent GO term
lens development in camera-type eye	0.00427	0.5	dependent GO term
male sex differentiation	0.00433	0.8	dependent GO term
macromolecule catabolic process	0.00439	0.125	dependent GO term
striated muscle tissue development	0.0044	1	dependent GO term
cellular metal ion homeostasis	0.0044	0.333333	dependent GO term
macrophage activation involved in immune response	0.00441	0.833333	dependent GO term
nucleoside diphosphate biosynthetic process	0.00441	0	dependent GO term
sodium ion homeostasis	0.00441	0.75	dependent GO term
mitotic spindle organization	0.00441	0.666667	dependent GO term
negative regulation of hemostasis	0.00441	1	dependent GO term
negative regulation of blood coagulation	0.00441	1	dependent GO term
T-helper 1 type immune response	0.00441	0.666667	dependent GO term
regulation of cardiac muscle cell proliferation	0.00441	0.666667	dependent GO term
positive regulation of Ras protein signal transduction	0.00441	0.666667	dependent GO term
negative regulation of hemostasis	0.00441	0.666667	dependent GO term
negative regulation of blood coagulation	0.00441	0.666667	dependent GO term
tRNA processing	0.00442	0	dependent GO term
protein deacetylation	0.00442	1	dependent GO term
blood vessel endothelial cell migration	0.00442	1	dependent GO term
hormone biosynthetic process	0.00442	1	dependent GO term
blood vessel endothelial cell migration	0.00442	1	dependent GO term
positive regulation of protein polymerization	0.00442	1	dependent GO term
regulation of MAPK cascade	0.00443	0.5	dependent GO term
positive regulation of protein modification process	0.00443	0.8	dependent GO term
ameboidal cell migration	0.00443	0.75	dependent GO term
cell-cell adhesion	0.00447	0	dependent GO term
negative regulation of nucleobase-containing compound metabolic process	0.00453	0.166667	dependent GO term
cell communication involved in cardiac conduction	0.00453	0.4	dependent GO term
negative regulation of heart contraction	0.00453	0.75	dependent GO term
regulation of receptor recycling	0.00453	0.5	dependent GO term
cellular extravasation	0.00453	0.5	dependent GO term
cell surface receptor signaling pathway involved in heart development	0.00453	0.75	dependent GO term
mating behavior	0.00453	0.5	dependent GO term
negative regulation of nucleobase-containing compound metabolic process	0.00453	0.25	dependent GO term
negative regulation of organic acid transport	0.00453	1	dependent GO term
cell activation	0.00455	0.333333	independent GO term
regulation of DNA methylation	0.00457	0.666667	dependent GO term
chemotaxis	0.00458	1	dependent GO term
glutamate receptor signaling pathway	0.00458	0	dependent GO term
translational initiation	0.00458	0	independent GO term
vacuole organization	0.00458	0	independent GO term
translational initiation	0.00458	0	independent GO term
catabolic process	0.00459	0.25	independent GO term
cellular protein metabolic process	0.0046	0.25	dependent GO term
taxis	0.00462	1	dependent GO term
regulation of cell migration	0.00463	0.666667	dependent GO term
regulation of hormone levels	0.00465	1	dependent GO term
regulation of immune response	0.00469	0.666667	dependent GO term
collagen biosynthetic process	0.00471	0.666667	dependent GO term
morphogenesis of an epithelial sheet	0.00471	1	dependent GO term
negative regulation of macromolecule biosynthetic process	0.00473	0.166667	dependent GO term
purine ribonucleotide metabolic process	0.00473	0.5	dependent GO term
negative regulation of macromolecule biosynthetic process	0.00473	0.25	dependent GO term
cardiac septum development	0.00474	0.5	dependent GO term
mechanoreceptor differentiation	0.00474	0.5	dependent GO term
pyridine-containing compound metabolic process	0.00474	0	dependent GO term
negative regulation of angiogenesis	0.00474	1	dependent GO term
negative regulation of neuron differentiation	0.00474	0.5	dependent GO term
negative regulation of nitrogen compound metabolic process	0.00483	0.166667	dependent GO term
negative regulation of nitrogen compound metabolic process	0.00483	0.25	dependent GO term
DNA replication	0.00487	0	dependent GO term
transmission of nerve impulse	0.00489	0.8	dependent GO term
transmission of nerve impulse	0.00489	0.6	dependent GO term
[truncated: 2,643 more rows]

## Sheet: 4-month
GO terms	Significance p-value	diseae enrichment ratio	GO term type
[truncated: 3,349 more rows]
