# Supplementary material for: Network stratification analysis for identifying function-specific network layers
Source: Royal Society of Chemistry journal article supplement (doi:10.1039/c5mb00782h), 2016-02-08
Supplement: c5mb00782h1.zip [file Supplementary_Table_S1.xlsx]

## Sheet: Sheet1
GO Terms	normal	cirrhotic	dysplastic	early	SD	1/CV
cellular response to thyroid hormone stimulus	0.978885	0	1	0	0.57132	0.865927
DNA ligation	1	0	0.974314	0	0.570032	0.865879
myeloid dendritic cell differentiation	0	1	0.974314	0	0.570032	0.865879
leukocyte migration involved in inflammatory response	0.978885	0.982889	0	0	0.566318	0.866022
positive regulation of protein processing	0.978885	0.982889	0	0	0.566318	0.866022
negative regulation of gastric acid secretion	0.978885	0	0	0.982304	0.566148	0.866023
positive regulation of mRNA catabolic process	0.978885	0	0	0.982304	0.566148	0.866023
smooth muscle cell migration	0.978885	0	0	0.982304	0.566148	0.866023
negative regulation of intestinal phytosterol absorption	0	0.982889	0.974314	0	0.565006	0.866009
postsynaptic density protein 95 clustering	0	0.982889	0.974314	0	0.565006	0.866009
cholesterol import	0	0	0.974314	0.982304	0.564836	0.866011
type I interferon biosynthetic process	0.978885	0	0.974314	0	0.563843	0.866021
spliceosomal snRNP assembly	0.999801	0	0	0.950523	0.563369	0.865473
regulation of mRNA processing	0.98921	0	0	0.945624	0.558822	0.865586
zymogen activation	0.94279	0.953141	0	0	0.547324	0.866
regulation of alpha-amino-3-hydroxy-5-methyl-4-isoxazole propionate selective glutamate receptor activity	0	0.953141	0.931173	0	0.544029	0.865908
negative regulation of endothelial cell proliferation	0	0.869405	0.997125	0	0.541338	0.861999
high-density lipoprotein particle remodeling	0	0	0.815985	0.980911	0.523071	0.858821
regulation of mast cell degranulation	0.832219	0	0	0.966226	0.522041	0.861257
glomerular visceral epithelial cell development	0	0.755467	1	0	0.516499	0.849695
regulation of interleukin-6 biosynthetic process	0	0	1	0.751623	0.515717	0.849121
positive regulation of positive chemotaxis	0	0.820566	0.943723	0	0.511782	0.861836
base conversion or substitution editing	0.730471	1	0	0	0.511519	0.845751
positive regulation of saliva secretion	0.730471	1	0	0	0.511519	0.845751
mesonephric tubule development	0	0.755467	0	0.982304	0.510127	0.851636
purine ribonucleoside salvage	0	0.755467	0	0.982304	0.510127	0.851636
Clara cell differentiation	0	0.982889	0	0.751623	0.509534	0.851028
DNA demethylation	0.978885	0.755467	0	0	0.508905	0.852002
positive regulation of receptor biosynthetic process	0.978885	0.755467	0	0	0.508905	0.852002
polyamine biosynthetic process	0.978885	0	0	0.751623	0.508097	0.851465
regulation of glucose import in response to insulin stimulus	0.978885	0	0	0.751623	0.508097	0.851465
synaptic transmission involved in micturition	0.978885	0	0	0.751623	0.508097	0.851465
positive regulation of epithelial cell proliferation involved in lung morphogenesis	0	0.755467	0.974314	0	0.507274	0.852488
regulation of receptor internalization	0	0.755467	0.974314	0	0.507274	0.852488
deoxyribonucleoside diphosphate metabolic process	0	0	0.974314	0.751623	0.506462	0.851958
gamma-aminobutyric acid signaling pathway	0	0	0.974314	0.751623	0.506462	0.851958
keratan sulfate catabolic process	0	0	0.974314	0.751623	0.506462	0.851958
positive regulation of macrophage activation	0.730471	0.982889	0	0	0.505225	0.84782
regulation of DNA biosynthetic process	0.730471	0	0	0.982304	0.505012	0.847889
sensory perception of smell	0.730471	0	0	0.982304	0.505012	0.847889
vesicle transport along microtubule	0	0	0.752117	0.965572	0.503453	0.852954
synaptic transmission, dopaminergic	0	0.982889	0.705125	0	0.500308	0.843487
DNA strand elongation	1	0	0	0	0.5	0.5
COPI coating of Golgi vesicle	1	0	0	0	0.5	0.5
cellular response to calcium ion	0.999935	0	0	0	0.499968	0.5
telomere maintenance	0.999925	0	0	0	0.499962	0.5
proton transport	0	0	0	0.999778	0.499889	0.5
negative regulation of blood coagulation	0	0.999569	0	0	0.499785	0.5
dendritic cell migration	0	0.999362	0	0	0.499681	0.5
patterning of blood vessels	0	0.998396	0	0	0.499198	0.5
DNA deamination	0.998031	0	0	0	0.499016	0.5
purinergic nucleotide receptor signaling pathway	0.978885	0	0.705125	0	0.498813	0.844008
spliceosomal complex assembly	0	0.666647	0	0.996714	0.49872	0.833815
intrinsic apoptotic signaling pathway in response to endoplasmic reticulum stress	0	0	0	0.996714	0.498357	0.5
neutrophil activation	0	0	0	0.996249	0.498125	0.5
positive regulation of calcium-mediated signaling	0	0	0.992475	0	0.496237	0.5
regulation of response to food	0	0	0.992475	0	0.496237	0.5
regulation of endothelial cell apoptotic process	0	0	0	0.991525	0.495763	0.5
nucleotide-excision repair, DNA gap filling	0.991393	0	0	0	0.495697	0.5
membrane protein intracellular domain proteolysis	0	0	0.986905	0	0.493452	0.5
negative regulation of peptide secretion	0	0	0.985515	0	0.492757	0.5
spinal cord motor neuron differentiation	0	0	0.985515	0	0.492757	0.5
macrophage activation involved in immune response	0	0.982889	0	0	0.491444	0.5
negative regulation of autophagy	0	0.982889	0	0	0.491444	0.5
response to vitamin D	0	0.982889	0	0	0.491444	0.5
dolichol metabolic process	0	0	0	0.982304	0.491152	0.5
epithelial cell morphogenesis	0	0	0	0.982304	0.491152	0.5
hyaluronan catabolic process	0	0	0	0.982304	0.491152	0.5
negative regulation of bone mineralization	0	0	0	0.982304	0.491152	0.5
negative regulation of erythrocyte differentiation	0	0	0	0.982304	0.491152	0.5
positive regulation of megakaryocyte differentiation	0	0	0	0.982304	0.491152	0.5
positive regulation of vascular permeability	0	0	0	0.982304	0.491152	0.5
synaptic vesicle clustering	0	0.982889	0.974314	0.982304	0.489933	1.49995
membrane protein ectodomain proteolysis	0	0	0.979122	0	0.489561	0.5
cellular response to interferon-alpha	0.978885	0	0	0	0.489442	0.5
cellular response to potassium ion	0.978885	0	0	0	0.489442	0.5
positive regulation of autophagy	0.978885	0	0	0	0.489442	0.5
protein targeting to Golgi	0.978885	0	0	0	0.489442	0.5
termination of signal transduction	0.978885	0	0	0	0.489442	0.5
B cell homeostasis	0	0	0	0.978796	0.489398	0.5
cellular response to lithium ion	0.978885	0.982889	0.974314	0	0.48936	1.49996
plasma kallikrein-kinin cascade	0.978885	0.982889	0.974314	0	0.48936	1.49996
regulation of RNA splicing	0	0.978656	0	0	0.489328	0.5
positive regulation of heart rate	0	0	0.974314	0	0.487157	0.5
regulation of activin receptor signaling pathway	0	0	0.973184	0	0.486592	0.5
SMAD protein complex assembly	0	0.867369	0.174277	0.966226	0.485938	1.03299
regulation of defense response to virus by virus	0.971686	0	0	0	0.485843	0.5
positive regulation of protein insertion into mitochondrial membrane involved in apoptotic signaling pathway	0.971164	0	0	0	0.485582	0.5
DNA biosynthetic process	0.969847	0	0	0	0.484924	0.5
DNA replication initiation	0	0	0.559559	0.999997	0.484784	0.804253
triglyceride homeostasis	0	0	0	0.965572	0.482786	0.5
pro-B cell differentiation	0.94279	0.997762	0.931173	0	0.479501	1.49725
Notch signaling involved in heart development	0.843774	0	0.815985	0	0.479266	0.865783
succinate metabolic process	0.533578	0	0	0.991525	0.478311	0.79713
negative regulation of cell-matrix adhesion	0	0	0	0.95162	0.47581	0.5
positive regulation of collagen biosynthetic process	0	0	0	0.95162	0.47581	0.5
regulation of tumor necrosis factor biosynthetic process	0	0	0	0.95162	0.47581	0.5
ventricular trabecula myocardium morphogenesis	0.624312	0.953141	0	0	0.474747	0.830681
extracellular negative regulation of signal transduction	0.624312	0	0	0.95162	0.47415	0.830924
clathrin coat assembly	0.989067	0	0.497191	0	0.473713	0.784366
regulation of protein sumoylation	0	0.65663	0.931173	0	0.471864	0.84124
tachykinin receptor signaling pathway	0	0.994561	0	0.239844	0.471076	0.655098
anterograde axon cargo transport	0.93708	0	0	0	0.46854	0.5
carnitine transport	0.97562	0.49605	0	0	0.467777	0.786523
positive regulation of fatty acid metabolic process	0.931905	0	0	0	0.465953	0.5
positive regulation of erythrocyte differentiation	0	0	0.931173	0	0.465586	0.5
synaptic transmission, glutamatergic	0	0	0.931173	0	0.465586	0.5
cargo loading into vesicle	0.978885	0.755467	0	0.982304	0.465049	1.46041
mitochondrial protein catabolic process	0	0.982889	0.974314	0.751623	0.46399	1.45953
positive regulation of myeloid leukocyte cytokine production involved in immune response	0	0.982889	0.705125	0.982304	0.463876	1.43913
enteroendocrine cell differentiation	0.730471	0.982889	0.974314	0	0.462979	1.45129
spinal cord oligodendrocyte cell fate specification	0.730471	0.982889	0.974314	0	0.462979	1.45129
regulation of interleukin-12 biosynthetic process	0	0.967085	0.943723	0.424598	0.462824	1.2615
peptidyl-glutamic acid carboxylation	0	0	0	0.916839	0.458419	0.5
embryonic camera-type eye development	0	0.967085	0.350567	0	0.456106	0.722229
regulation of fatty acid oxidation	0.980886	0.924601	0	0.710964	0.451309	1.44937
nucleosome disassembly	0	0.897574	0	0	0.448787	0.5
positive regulation of cytokinesis	0.896513	0	0	0	0.448256	0.5
skeletal muscle contraction	0.896513	0	0	0	0.448256	0.5
enucleate erythrocyte differentiation	0.896513	0	0.876831	0.911715	0.447737	1.49924
cellular response to indole-3-methanol	0.843774	0	0.997125	0.489764	0.442751	1.31601
positive regulation of bone mineralization	0	0	0.291647	0.937633	0.442128	0.695093
positive regulation of exocytosis	0	0	0	0.883312	0.441656	0.5
granulocyte differentiation	0	0	0.497191	0.911715	0.440518	0.799573
cellular response to interleukin-4	0	0	0.876831	0	0.438415	0.5
copper ion homeostasis	0	0	0.876831	0	0.438415	0.5
epithelial tube branching involved in lung morphogenesis	0	0	0.876831	0	0.438415	0.5
regulation of N-methyl-D-aspartate selective glutamate receptor activity	0	0	0.876831	0	0.438415	0.5
eye photoreceptor cell differentiation	0	0.755467	0	0.751623	0.435062	0.86602
peripheral nervous system myelin maintenance	0	0.755467	0	0.751623	0.435062	0.86602
positive regulation of telomerase activity	0	0.755467	0	0.751623	0.435062	0.86602
positive regulation of vasculogenesis	0	0.755467	0	0.751623	0.435062	0.86602
post-chaperonin tubulin folding pathway	0	0.755467	0	0.751623	0.435062	0.86602
phosphatidylcholine metabolic process	0.729639	0.769623	0	0	0.433107	0.86541
viral protein processing	0.869025	0.666647	0.957759	0	0.433061	1.43942
nucleoside triphosphate biosynthetic process	0	0	0	0.865584	0.432792	0.5
substrate adhesion-dependent cell spreading	0.533578	0	0.876831	0	0.430591	0.818881
DNA strand renaturation	0.730471	0.755467	0	0	0.429075	0.86578
attachment of spindle microtubules to kinetochore	0.730471	0.755467	0	0	0.429075	0.86578
cellular response to cholesterol	0.730471	0.755467	0	0	0.429075	0.86578
negative regulation of heterotypic cell-cell adhesion	0.730471	0.755467	0	0	0.429075	0.86578
oligodendrocyte cell fate commitment	0.730471	0.755467	0	0	0.429075	0.86578
phosphatidylglycerol acyl-chain remodeling	0.730471	0.755467	0	0	0.429075	0.86578
positive regulation of circadian sleep/wake cycle, wakefulness	0.730471	0.755467	0	0	0.429075	0.86578
Mo-molybdopterin cofactor biosynthetic process	0.730471	0	0	0.751623	0.427931	0.865849
cellular response to catecholamine stimulus	0.730471	0	0	0.751623	0.427931	0.865849
intestinal cholesterol absorption	0.730471	0	0	0.751623	0.427931	0.865849
positive regulation of interleukin-1 alpha production	0.730471	0	0	0.751623	0.427931	0.865849
regulation of execution phase of apoptosis	0.730471	0	0	0.751623	0.427931	0.865849
regulation of B cell receptor signaling pathway	0.978885	0.755467	0	0.751623	0.427733	1.453
phospholipid homeostasis	0.730471	1	0.705125	0	0.4273	1.42499
regulation of telomere maintenance	0.461878	0	0.8881	0	0.426787	0.790779
negative regulation of negative chemotaxis	0.730471	0.755467	0	0.982304	0.426687	1.44617
negative regulation of interleukin-1 beta production	0	0.755467	0.974314	0.751623	0.426464	1.45464
regulation of branching involved in salivary gland morphogenesis by mesenchymal-epithelial signaling	0	0.755467	0.974314	0.751623	0.426464	1.45464
cellular response to epidermal growth factor stimulus	0.730471	0.982889	0	0.751623	0.426443	1.44508
gephyrin clustering	0	0.755467	0.705125	0.982304	0.424624	1.43827
replication fork processing	0	0.755467	0.705125	0.982304	0.424624	1.43827
tonic smooth muscle contraction	0.730471	0.755467	0.974314	0	0.42442	1.44919
cholesterol catabolic process	0	0.982889	0.705125	0.751623	0.424363	1.43723
positive regulation of gastrulation	0	0.982889	0.705125	0.751623	0.424363	1.43723
T-helper cell lineage commitment	0.730471	0	0.974314	0.751623	0.424	1.44835
bile acid and bile salt transport	0.730471	0	0.974314	0.751623	0.424	1.44835
keratan sulfate biosynthetic process	0.730471	0	0.974314	0.751623	0.424	1.44835
cellular response to gamma radiation	0.978885	0.755467	0.705125	0	0.423629	1.43963
cellular response to gonadotropin stimulus	0	0.755467	0.705125	0	0.422137	0.864998
positive regulation of hormone biosynthetic process	0	0.755467	0.705125	0	0.422137	0.864998
positive regulation of lipopolysaccharide-mediated signaling pathway	0	0.755467	0.705125	0	0.422137	0.864998
positive regulation of synapse maturation	0	0.755467	0.705125	0	0.422137	0.864998
regulation of myeloid cell apoptotic process	0	0.755467	0.705125	0	0.422137	0.864998
sphingolipid catabolic process	0	0.755467	0.705125	0	0.422137	0.864998
surfactant homeostasis	0	0.755467	0.705125	0	0.422137	0.864998
autophagic vacuole fusion	0.730471	0.982889	0.705125	0	0.422134	1.4323
mature dendritic cell differentiation	0.730471	0.982889	0.705125	0	0.422134	1.4323
pyrimidine nucleoside metabolic process	0.843774	0	0	0	0.421887	0.5
regulation of T cell receptor signaling pathway	0.843774	0	0	0	0.421887	0.5
regulation of glycoprotein biosynthetic process	0.843774	0	0	0	0.421887	0.5
lactose biosynthetic process	0	0	0.705125	0.751623	0.420955	0.865144
metanephric loop of Henle development	0	0	0.705125	0.751623	0.420955	0.865144
negative regulation of female receptivity	0	0	0.705125	0.751623	0.420955	0.865144
regulation of circadian sleep/wake cycle, REM sleep	0	0	0.705125	0.751623	0.420955	0.865144
regulation of glomerular filtration	0	0	0.705125	0.751623	0.420955	0.865144
sulfate transport	0	0	0.705125	0.751623	0.420955	0.865144
triglyceride-rich lipoprotein particle remodeling	0	0	0.705125	0.751623	0.420955	0.865144
nitric oxide mediated signal transduction	0.456029	0.869405	0	0	0.418184	0.792375
protein export from nucleus	0.832219	0	0	0	0.41611	0.5
Golgi to plasma membrane protein transport	0.730471	0	0.705125	0	0.41455	0.865756
growth plate cartilage development	0.730471	0	0.705125	0	0.41455	0.865756
high-density lipoprotein particle assembly	0.730471	0	0.705125	0	0.41455	0.865756
histamine secretion	0.730471	0	0.705125	0	0.41455	0.865756
regulation of fibroblast migration	0.730471	0	0.705125	0	0.41455	0.865756
sphingomyelin metabolic process	0.730471	0	0.705125	0	0.41455	0.865756
zinc ion transport	0.730471	0	0.705125	0	0.41455	0.865756
regulation of nitric-oxide synthase activity	0	0.826225	0	0	0.413112	0.5
regulation of the force of heart contraction by chemical signal	0.624312	0.997762	0.592101	0	0.412406	1.34223
positive regulation of synapse assembly	0	0	0.815985	0	0.407993	0.5
reverse cholesterol transport	0	0	0.815985	0	0.407993	0.5
protein localization to Golgi apparatus	0.989067	0.570721	0.497191	0	0.405538	1.26805
positive regulation of endoplasmic reticulum unfolded protein response	0.624312	0.65663	0	0.95162	0.400177	1.39473
T cell homeostasis	0.177713	0.568003	0.146336	0.990433	0.396082	1.18819
negative regulation of protein catabolic process	0.787429	0	0	0	0.393715	0.5
focal adhesion assembly	0	0	0	0.763576	0.381788	0.5
positive regulation of release of cytochrome c from mitochondria	0	0	0	0.763576	0.381788	0.5
eye photoreceptor cell development	0	0.755467	0	0	0.377733	0.5
killing by host of symbiont cells	0	0.755467	0	0	0.377733	0.5
maintenance of gastrointestinal epithelium	0	0.755467	0	0	0.377733	0.5
mitotic cell cycle arrest	0	0.755467	0	0	0.377733	0.5
negative regulation of lipid catabolic process	0	0.755467	0	0	0.377733	0.5
phosphatidic acid metabolic process	0	0.755467	0	0	0.377733	0.5
positive regulation of striated muscle cell differentiation	0	0.755467	0	0	0.377733	0.5
positive regulation of toll-like receptor signaling pathway	0	0.755467	0	0	0.377733	0.5
post-embryonic camera-type eye development	0	0.755467	0	0	0.377733	0.5
regulation of keratinocyte differentiation	0	0.755467	0	0	0.377733	0.5
sphingolipid biosynthetic process	0	0.755467	0	0	0.377733	0.5
positive regulation of cardioblast differentiation	0	0.65663	0	0.651624	0.377666	0.866013
transmembrane receptor protein tyrosine phosphatase signaling pathway	0.533578	0.570721	0	0.911715	0.37664	1.33816
positive regulation of T cell cytokine production	0	0	0.752117	0	0.376058	0.5
regulation of actin cytoskeleton reorganization	0	0	0.752117	0	0.376058	0.5
regulation of focal adhesion assembly	0	0	0.752117	0	0.376058	0.5
B cell proliferation	0	0	0	0.751623	0.375811	0.5
RNA (guanine-N7)-methylation	0	0	0	0.751623	0.375811	0.5
Type II pneumocyte differentiation	0	0	0	0.751623	0.375811	0.5
acetylcholine catabolic process in synaptic cleft	0	0	0	0.751623	0.375811	0.5
monocyte differentiation	0	0	0	0.751623	0.375811	0.5
negative regulation of Notch signaling pathway	0	0	0	0.751623	0.375811	0.5
negative regulation of cell fate specification	0	0	0	0.751623	0.375811	0.5
positive regulation of ERBB signaling pathway	0	0	0	0.751623	0.375811	0.5
positive regulation of cytokine production involved in inflammatory response	0	0	0	0.751623	0.375811	0.5
positive regulation of mesenchymal stem cell differentiation	0	0	0	0.751623	0.375811	0.5
protein import into peroxisome matrix, translocation	0	0	0	0.751623	0.375811	0.5
proteoglycan biosynthetic process	0	0	0	0.751623	0.375811	0.5
regulation of granulocyte differentiation	0	0	0	0.751623	0.375811	0.5
positive regulation of pseudopodium assembly	0.533578	0.914356	0.497191	0	0.375088	1.29645
cellular extravasation	0.730471	0.755467	0	0.751623	0.373089	1.49935
cellular response to glucose starvation	0.730471	0.755467	0	0.751623	0.373089	1.49935
myosin filament assembly	0.730471	0.755467	0	0.751623	0.373089	1.49935
positive regulation of epidermal cell differentiation	0.730471	0.755467	0	0.751623	0.373089	1.49935
protein localization to M-band	0.730471	0.755467	0	0.751623	0.373089	1.49935
protein prenylation	0.730471	0.755467	0	0.751623	0.373089	1.49935
regulation of smooth muscle cell-matrix adhesion	0.730471	0.755467	0	0.751623	0.373089	1.49935
nucleotide-excision repair, DNA incision	0.896513	0.570721	0.497191	0	0.370547	1.32535
forebrain neuroblast division	0	0.755467	0.705125	0.751623	0.369412	1.49712
protein retention in ER lumen	0	0.755467	0.705125	0.751623	0.369412	1.49712
positive regulation of mitochondrial outer membrane permeabilization	0.624312	0	0	0.651624	0.3685	0.865629
L-ascorbic acid metabolic process	0.730471	0.755467	0.705125	0	0.365755	1.49763
isocitrate metabolic process	0.730471	0.755467	0.705125	0	0.365755	1.49763
metanephric distal tubule development	0.730471	0.755467	0.705125	0	0.365755	1.49763
regulation of systemic arterial blood pressure by endothelin	0.730471	0.755467	0.705125	0	0.365755	1.49763
vascular smooth muscle cell differentiation	0.730471	0.755467	0.705125	0	0.365755	1.49763
mRNA splice site selection	0.730471	0	0	0	0.365236	0.5
mitochondrion transport along microtubule	0.730471	0	0	0	0.365236	0.5
negative regulation of helicase activity	0.730471	0	0	0	0.365236	0.5
negative regulation of macrophage derived foam cell differentiation	0.730471	0	0	0	0.365236	0.5
positive regulation of antigen receptor-mediated signaling pathway	0.730471	0	0	0	0.365236	0.5
positive regulation of cytoplasmic mRNA processing body assembly	0.730471	0	0	0	0.365236	0.5
positive regulation of dermatome development	0.730471	0	0	0	0.365236	0.5
regulation of germinal center formation	0.730471	0	0	0	0.365236	0.5
targeting of mRNA for destruction involved in RNA interference	0.730471	0	0	0	0.365236	0.5
G-protein coupled acetylcholine receptor signaling pathway	0.730471	0	0.705125	0.751623	0.365032	1.49796
cellular response to bacterial lipopeptide	0.730471	0	0.705125	0.751623	0.365032	1.49796
detection of diacyl bacterial lipopeptide	0.730471	0	0.705125	0.751623	0.365032	1.49796
detection of triacyl bacterial lipopeptide	0.730471	0	0.705125	0.751623	0.365032	1.49796
lens induction in camera-type eye	0.730471	0	0.705125	0.751623	0.365032	1.49796
negative regulation of epinephrine secretion	0.730471	0	0.705125	0.751623	0.365032	1.49796
negative regulation of establishment of protein localization to plasma membrane	0.730471	0	0.705125	0.751623	0.365032	1.49796
negative regulation of lipoprotein metabolic process	0.730471	0	0.705125	0.751623	0.365032	1.49796
negative regulation of macrophage cytokine production	0.730471	0	0.705125	0.751623	0.365032	1.49796
negative regulation of receptor biosynthetic process	0.730471	0	0.705125	0.751623	0.365032	1.49796
positive regulation of insulin receptor signaling pathway	0.730471	0	0.705125	0.751623	0.365032	1.49796
positive regulation of odontogenesis	0.730471	0	0.705125	0.751623	0.365032	1.49796
regulation of cardiac cell fate specification	0.730471	0	0.705125	0.751623	0.365032	1.49796
regulation of secondary heart field cardioblast proliferation	0.730471	0	0.705125	0.751623	0.365032	1.49796
signal complex assembly	0	0.867369	0.507023	0.607989	0.36359	1.36306
sensory perception of taste	0	0.769623	0.294369	0	0.363297	0.732179
positive regulation of immune response to tumor cell	0	0.65663	0.592101	0	0.361439	0.863722
positive regulation of lipid catabolic process	0	0.65663	0.592101	0	0.361439	0.863722
protein refolding	0	0	0	0.710964	0.355482	0.5
regulation of follicle-stimulating hormone secretion	0.456029	0.869405	0.417492	0	0.355284	1.22643
glycolipid catabolic process	0	0	0.705125	0	0.352562	0.5
inflammatory cell apoptotic process	0	0	0.705125	0	0.352562	0.5
maintenance of protein location in nucleus	0	0	0.705125	0	0.352562	0.5
microtubule anchoring at microtubule organizing center	0	0	0.705125	0	0.352562	0.5
negative regulation of circadian sleep/wake cycle, sleep	0	0	0.705125	0	0.352562	0.5
negative regulation of collagen biosynthetic process	0	0	0.705125	0	0.352562	0.5
negative regulation of heart contraction	0	0	0.705125	0	0.352562	0.5
neuronal stem cell maintenance	0	0	0.705125	0	0.352562	0.5
positive regulation of catecholamine secretion	0	0	0.705125	0	0.352562	0.5
positive regulation of smoothened signaling pathway	0	0	0.705125	0	0.352562	0.5
protein trimerization	0	0	0.705125	0	0.352562	0.5
regulation of circadian sleep/wake cycle, non-REM sleep	0	0	0.705125	0	0.352562	0.5
regulation of norepinephrine secretion	0	0	0.705125	0	0.352562	0.5
spinal cord association neuron differentiation	0	0	0.705125	0	0.352562	0.5
pyrimidine nucleobase metabolic process	0.729639	0	0	0.368102	0.349578	0.785048
receptor clustering	0	0	0.687756	0	0.343878	0.5
positive regulation of cytokine-mediated signaling pathway	0	0.65663	0	0	0.328315	0.5
macrophage differentiation	0	0.570721	0	0.564928	0.327842	0.866003
melanosome localization	0.533578	0.570721	0	0	0.319144	0.865047
negative regulation of cell cycle arrest	0	0.65663	0.592101	0.651624	0.318079	1.49362
progesterone receptor signaling pathway	0.624312	0.65663	0.592101	0	0.313283	1.49469
cellular response to fatty acid	0.624312	0	0	0	0.312156	0.5
positive regulation of chondrocyte differentiation	0	0.570721	0.497191	0	0.309738	0.861949
regulation of smooth muscle cell migration	0	0	0	0.607989	0.303994	0.5
diterpenoid metabolic process	0	0	0.597623	0	0.298812	0.5
nuclear pore complex assembly	0.533578	0	0.497191	0	0.297928	0.864948
establishment of spindle orientation	0	0	0.592101	0	0.29605	0.5
negative regulation of smoothened signaling pathway	0	0	0.592101	0	0.29605	0.5
ribonucleoside monophosphate biosynthetic process	0	0	0.592101	0	0.29605	0.5
negative regulation of endocytosis	0	0.570721	0	0	0.285361	0.5
positive regulation of cell morphogenesis involved in differentiation	0	0	0	0.56964	0.28482	0.5
mitotic nuclear envelope disassembly	0.565241	0	0	0	0.28262	0.5
polyamine metabolic process	0	0	0	0.564928	0.282464	0.5
preassembly of GPI anchor in ER membrane	0	0	0.56419	0	0.282095	0.5
negative regulation of growth of symbiont in host	0.456029	0.49605	0	0	0.275327	0.864499
positive regulation of intracellular steroid hormone receptor signaling pathway	0	0.570721	0.497191	0.564928	0.27418	1.48884
regulation of gene expression by genetic imprinting	0.456029	0	0	0.489764	0.273374	0.864926
negative regulation of striated muscle cell differentiation	0.533578	0	0	0	0.266789	0.5
COPI-coated vesicle budding	0.624689	0	0.281099	0.387885	0.259043	1.24851
positive regulation of interferon-beta production	0	0	0.507023	0	0.253512	0.5
positive regulation of interleukin-1 beta production	0	0	0.507023	0	0.253512	0.5
behavioral response to nicotine	0	0	0.497191	0	0.248595	0.5
negative regulation of transmission of nerve impulse	0	0	0.497191	0	0.248595	0.5
positive regulation of Notch signaling pathway	0	0	0.497191	0	0.248595	0.5
positive regulation of cell-matrix adhesion	0	0	0.497191	0	0.248595	0.5
mitotic nuclear envelope reassembly	0	0.49605	0	0	0.248025	0.5
positive regulation of glucose import	0	0	0	0.491579	0.24579	0.5
regulation of ATPase activity	0	0	0	0.489764	0.244882	0.5
regulation of systemic arterial blood pressure by renin-angiotensin	0	0.246041	0.507023	0	0.242097	0.777648
leukemia inhibitory factor signaling pathway	0.456029	0.49605	0	0.489764	0.240949	1.49601
neural crest cell differentiation	0.0810217	0.361572	0.514924	0	0.240302	0.996159
intracellular estrogen receptor signaling pathway	0.461878	0	0	0	0.230939	0.5
N-terminal protein amino acid modification	0.456029	0	0	0	0.228015	0.5
cardiac muscle hypertrophy	0.456029	0	0	0	0.228015	0.5
macroautophagy	0.389749	0	0.350567	0	0.214309	0.86361
regulation of natural killer cell activation	0.389749	0	0.350567	0	0.214309	0.86361
cellular polysaccharide biosynthetic process	0	0	0	0.424598	0.212299	0.5
regulation of intracellular estrogen receptor signaling pathway	0	0	0	0.424598	0.212299	0.5
hair cell differentiation	0	0	0.417492	0	0.208746	0.5
inner ear receptor cell differentiation	0	0	0.417492	0	0.208746	0.5
spindle assembly	0	0	0.417492	0	0.208746	0.5
bicarbonate transport	0.416822	0	0	0	0.208411	0.5
intermediate filament bundle assembly	0.996932	0.997762	0.592101	0.997647	0.202674	4.42145
forebrain neuron differentiation	0.389749	0	0	0	0.194875	0.5
regulation of interleukin-2 biosynthetic process	0.389749	0	0	0	0.194875	0.5
positive regulation of protein catabolic process	0.384469	0	0	0	0.192234	0.5
citrate metabolic process	0.624312	0.65663	0.592101	0.997647	0.1885	3.80729
DNA recombinase assembly	0.729639	0.769623	0.687756	0.368102	0.183522	3.48068
attachment of GPI anchor to protein	0.896513	0.570721	0.497191	0.564928	0.179252	3.52765
ventricular cardiac muscle tissue development	0	0	0.247695	0.351899	0.178239	0.840997
neural crest cell development	0.375105	0	0	0.135472	0.176903	0.721549
cellular response to interleukin-6	0	0	0.350567	0	0.175283	0.5
regulation of androgen receptor signaling pathway	0	0	0.350567	0	0.175283	0.5
cardiac muscle cell development	0.336707	0.122024	0	0	0.158801	0.72218
immune response-inhibiting cell surface receptor signaling pathway	1	0.755467	0.705125	1	0.157064	5.50824
negative regulation of dendritic cell differentiation	0.978885	0.755467	0.705125	0.982304	0.145971	5.86038
positive regulation of T cell tolerance induction	0.978885	0.755467	0.705125	0.982304	0.145971	5.86038
synaptic vesicle exocytosis	0	0	0.291647	0	0.145824	0.5
acetyl-CoA biosynthetic process	0.730471	0.755467	1	0.982304	0.143833	6.02824
peptide cross-linking	0	0	0.281099	0	0.140549	0.5
regulation of heart rate by cardiac conduction	0	0	0	0.276658	0.138329	0.5
caveola assembly	0.730471	0.755467	0.974314	0.982304	0.136295	6.31452
maintenance of DNA repeat elements	0.730471	0.755467	0.974314	0.982304	0.136295	6.31452
positive regulation of helicase activity	0.730471	0.755467	0.974314	0.982304	0.136295	6.31452
vesicle fusion with Golgi apparatus	1	0.755467	0.705125	0.751623	0.133276	6.02549
positive regulation of platelet-derived growth factor receptor signaling pathway	0.730471	0.982889	0.705125	0.751623	0.128324	6.17601
auditory receptor cell fate commitment	0.730471	0.755467	0.705125	0.982304	0.127641	6.21543
natural killer cell differentiation	0.730471	0.755467	0.705125	0.982304	0.127641	6.21543
positive regulation of chemokine (C-X-C motif) ligand 2 production	0.730471	0.755467	0.705125	0.982304	0.127641	6.21543
regulation of RNA export from nucleus	0.730471	0.755467	0.705125	0.982304	0.127641	6.21543
regulation of definitive erythrocyte differentiation	0.730471	0.755467	0.705125	0.982304	0.127641	6.21543
serotonin secretion by platelet	0.730471	0.755467	0.705125	0.982304	0.127641	6.21543
opioid receptor signaling pathway	0.978885	0.755467	0.705125	0.751623	0.122889	6.49185
protein import into peroxisome matrix, docking	0.978885	0.755467	0.705125	0.751623	0.122889	6.49185
regulation of myelination	0.978885	0.755467	0.705125	0.751623	0.122889	6.49185
cilium morphogenesis	0	0	0	0.239844	0.119922	0.5
Bergmann glial cell differentiation	0.730471	0.755467	0.974314	0.751623	0.114757	6.9971
branch elongation involved in salivary gland morphogenesis	0.730471	0.755467	0.974314	0.751623	0.114757	6.9971
cellular response to peptidoglycan	0.730471	0.755467	0.974314	0.751623	0.114757	6.9971
low-density lipoprotein particle remodeling	0.730471	0.755467	0.974314	0.751623	0.114757	6.9971
mesenchymal cell differentiation involved in lung development	0.730471	0.755467	0.974314	0.751623	0.114757	6.9971
positive regulation of NAD(P)H oxidase activity	0.730471	0.755467	0.974314	0.751623	0.114757	6.9971
retrograde axon cargo transport	0.730471	0.755467	0.974314	0.751623	0.114757	6.9971
positive regulation of interferon-alpha production	0	0	0.207552	0	0.103776	0.5
DNA damage response, signal transduction resulting in transcription	0	0	0.122874	0.180257	0.0905879	0.836566
dopamine receptor signaling pathway	0.177713	0	0	0	0.0888563	0.5
protein localization to endoplasmic reticulum	0.129801	0.161538	0	0.156268	0.0758827	1.47467
cardiac muscle cell differentiation	0	0	0	0.102911	0.0514557	0.5
peptide hormone processing	0	0	0.086631	0	0.0433155	0.5
mitochondrial ATP synthesis coupled electron transport	0.624312	0.65663	0.592101	0.651624	0.029665	21.2765
formation of translation preinitiation complex	0	0	0	0.0498472	0.0249236	0.5
DNA replication, synthesis of RNA primer	0.730471	0.755467	0.705125	0.751623	0.0231406	31.7914
branch elongation involved in mammary gland duct branching	0.730471	0.755467	0.705125	0.751623	0.0231406	31.7914
cellular response to erythropoietin	0.730471	0.755467	0.705125	0.751623	0.0231406	31.7914
cellular response to interferon-beta	0.730471	0.755467	0.705125	0.751623	0.0231406	31.7914
cellular response to interleukin-3	0.730471	0.755467	0.705125	0.751623	0.0231406	31.7914
convergent extension involved in neural plate elongation	0.730471	0.755467	0.705125	0.751623	0.0231406	31.7914
dosage compensation	0.730471	0.755467	0.705125	0.751623	0.0231406	31.7914
fusion of sperm to egg plasma membrane	0.730471	0.755467	0.705125	0.751623	0.0231406	31.7914
glomerular visceral epithelial cell differentiation	0.730471	0.755467	0.705125	0.751623	0.0231406	31.7914
glucocorticoid receptor signaling pathway	0.730471	0.755467	0.705125	0.751623	0.0231406	31.7914
heme catabolic process	0.730471	0.755467	0.705125	0.751623	0.0231406	31.7914
minus-end-directed organelle transport along microtubule	0.730471	0.755467	0.705125	0.751623	0.0231406	31.7914
negative regulation of chondrocyte differentiation	0.730471	0.755467	0.705125	0.751623	0.0231406	31.7914
negative regulation of keratinocyte proliferation	0.730471	0.755467	0.705125	0.751623	0.0231406	31.7914
negative regulation of telomerase activity	0.730471	0.755467	0.705125	0.751623	0.0231406	31.7914
platelet activating factor metabolic process	0.730471	0.755467	0.705125	0.751623	0.0231406	31.7914
positive regulation of retinoic acid receptor signaling pathway	0.730471	0.755467	0.705125	0.751623	0.0231406	31.7914
regulation of DNA methylation	0.730471	0.755467	0.705125	0.751623	0.0231406	31.7914
regulation of attachment of spindle microtubules to kinetochore	0.730471	0.755467	0.705125	0.751623	0.0231406	31.7914
regulation of centromeric sister chromatid cohesion	0.730471	0.755467	0.705125	0.751623	0.0231406	31.7914
sarcomerogenesis	0.730471	0.755467	0.705125	0.751623	0.0231406	31.7914
semaphorin-plexin signaling pathway involved in bone trabecula morphogenesis	0.730471	0.755467	0.705125	0.751623	0.0231406	31.7914
sphingosine metabolic process	0.730471	0.755467	0.705125	0.751623	0.0231406	31.7914
neutrophil aggregation	0.978885	0.982889	0.974314	0.982304	0.00394062	248.59
protein localization to nucleus	0	8.06166e-05	0.000507449	7.75456e-06	0.000241739	0.616181
regulation of G1/S transition of mitotic cell cycle	0	0	0.000302856	0	0.000151428	0.5
cell morphogenesis involved in neuron differentiation	1.06316e-40	1.59449e-37	0	0	7.97065e-38	0.500445
2-oxoglutarate metabolic process	0	0	0	0	0	0
5-phosphoribose 1-diphosphate biosynthetic process	0	0	0	0	0	0
B cell differentiation	0	0	0	0	0	0
B cell receptor transport into membrane raft	0	0	0	0	0	0
C21-steroid hormone biosynthetic process	0	0	0	0	0	0
CD8-positive, alpha-beta T cell lineage commitment	0	0	0	0	0	0
DNA catabolic process	0	0	0	0	0	0
DNA conformation change	0	0	0	0	0	0
DNA damage response, signal transduction by p53 class mediator	0	0	0	0	0	0
DNA dealkylation involved in DNA repair	0	0	0	0	0	0
DNA integration	0	0	0	0	0	0
DNA methylation	0	0	0	0	0	0
DNA protection	0	0	0	0	0	0
DNA recombination	0	0	0	0	0	0
DNA repair	0	0	0	0	0	0
DNA replication	0	0	0	0	0	0
DNA-templated transcription, elongation	0	0	0	0	0	0
DNA-templated transcription, initiation	0	0	0	0	0	0
DNA-templated transcription, termination	0	0	0	0	0	0
FasL biosynthetic process	0	0	0	0	0	0
Fc receptor signaling pathway	0	0	0	0	0	0
G-protein coupled glutamate receptor signaling pathway	0	0	0	0	0	0
G-protein coupled receptor internalization	0	0	0	0	0	0
G-protein coupled receptor signaling pathway, coupled to cyclic nucleotide second messenger	0	0	0	0	0	0
Golgi vesicle fusion to target membrane	0	0	0	0	0	0
Golgi vesicle prefusion complex stabilization	0	0	0	0	0	0
I-kappaB kinase/NF-kappaB signaling	0	0	0	0	0	0
ISG15-protein conjugation	0	0	0	0	0	0
JAK-STAT cascade	0	0	0	0	0	0
L-xylitol metabolic process	0	0	0	0	0	0
MAPK cascade	0	0	0	0	0	0
N-acetylglucosamine biosynthetic process	0	0	0	0	0	0
N-acetylneuraminate metabolic process	0	0	0	0	0	0
RNA catabolic process	0	0	0	0	0	0
RNA export from nucleus	0	0	0	0	0	0
RNA import into nucleus	0	0	0	0	0	0
RNA polymerase II transcriptional preinitiation complex assembly	0	0	0	0	0	0
RNA processing	0	0	0	0	0	0
RNA secondary structure unwinding	0	0	0	0	0	0
Ras protein signal transduction	0	0	0	0	0	0
S-adenosylmethioninamine metabolic process	0	0	0	0	0	0
SCF complex assembly	0	0	0	0	0	0
SNARE complex disassembly	0	0	0	0	0	0
SRP-dependent cotranslational protein targeting to membrane, signal sequence recognition	0	0	0	0	0	0
SRP-dependent cotranslational protein targeting to membrane, translocation	0	0	0	0	0	0
T cell activation involved in immune response	0	0	0	0	0	0
T cell aggregation	0	0	0	0	0	0
T cell differentiation	0	0	0	0	0	0
T cell proliferation	0	0	0	0	0	0
T-helper 2 cell cytokine production	0	0	0	0	0	0
Type I pneumocyte differentiation	0	0	0	0	0	0
UDP-galactose transport	0	0	0	0	0	0
Wnt receptor catabolic process	0	0	0	0	0	0
Wnt signaling pathway involved in dorsal/ventral axis specification	0	0	0	0	0	0
Wnt signaling pathway involved in forebrain neuroblast division	0	0	0	0	0	0
Wnt signaling pathway involved in somitogenesis	0	0	0	0	0	0
Wnt signaling pathway involved in wound healing, spreading of epidermal cells	0	0	0	0	0	0
Wnt-activated signaling pathway involved in forebrain neuron fate commitment	0	0	0	0	0	0
acrosome matrix dispersal	0	0	0	0	0	0
actin filament depolymerization	0	0	0	0	0	0
actin filament reorganization involved in cell cycle	0	0	0	0	0	0
actin modification	0	0	0	0	0	0
activation of plasma proteins involved in acute inflammatory response	0	0	0	0	0	0
acylglycerol acyl-chain remodeling	0	0	0	0	0	0
acylglycerol catabolic process	0	0	0	0	0	0
adenosine metabolic process	0	0	0	0	0	0
adenosine receptor signaling pathway	0	0	0	0	0	0
adrenergic receptor signaling pathway involved in heart process	0	0	0	0	0	0
amino acid transport	0	0	0	0	0	0
ammonium transport	0	0	0	0	0	0
androgen biosynthetic process	0	0	0	0	0	0
androgen receptor signaling pathway	0	0	0	0	0	0
angiotensin catabolic process in blood	0	0	0	0	0	0
angiotensin-activated signaling pathway	0	0	0	0	0	0
anterior compartment pattern formation	0	0	0	0	0	0
antibacterial peptide secretion	0	0	0	0	0	0
antigen processing and presentation of endogenous peptide antigen via MHC class I via ER pathway, TAP-dependent	0	0	0	0	0	0
antigen processing and presentation of endogenous peptide antigen via MHC class Ib via ER pathway, TAP-dependent	0	0	0	0	0	0
apoptotic process involved in heart morphogenesis	0	0	0	0	0	0
arterial endothelial cell differentiation	0	0	0	0	0	0
astral microtubule organization	0	0	0	0	0	0
astrocyte cell migration	0	0	0	0	0	0
atrioventricular node cell fate commitment	0	0	0	0	0	0
auditory receptor cell development	0	0	0	0	0	0
autophagy in response to ER overload	0	0	0	0	0	0
axon transport of mitochondrion	0	0	0	0	0	0
axoneme assembly	0	0	0	0	0	0
base-excision repair, gap-filling	0	0	0	0	0	0
behavioral response to cocaine	0	0	0	0	0	0
beta-amyloid formation	0	0	0	0	0	0
bile acid secretion	0	0	0	0	0	0
blood vessel lumenization	0	0	0	0	0	0
blue light signaling pathway	0	0	0	0	0	0
box C/D snoRNP assembly	0	0	0	0	0	0
bradykinin catabolic process	0	0	0	0	0	0
branch elongation involved in ureteric bud branching	0	0	0	0	0	0
branching involved in mammary gland duct morphogenesis	0	0	0	0	0	0
branching involved in ureteric bud morphogenesis	0	0	0	0	0	0
branchiomeric skeletal muscle development	0	0	0	0	0	0
branchiomotor neuron axon guidance	0	0	0	0	0	0
bud elongation involved in lung branching	0	0	0	0	0	0
bud outgrowth involved in lung branching	0	0	0	0	0	0
cAMP-mediated signaling	0	0	0	0	0	0
cGMP-mediated signaling	0	0	0	0	0	0
calcitonin catabolic process	0	0	0	0	0	0
calcium ion export	0	0	0	0	0	0
calcium ion transport	0	0	0	0	0	0
calcium ion-dependent exocytosis	0	0	0	0	0	0
calcium-mediated signaling	0	0	0	0	0	0
canonical Wnt signaling pathway	0	0	0	0	0	0
carboxylic acid catabolic process	0	0	0	0	0	0
cardiac muscle contraction	0	0	0	0	0	0
cardiac vascular smooth muscle cell development	0	0	0	0	0	0
cardiolipin metabolic process	0	0	0	0	0	0
catecholamine biosynthetic process	0	0	0	0	0	0
cell cycle checkpoint	0	0	0	0	0	0
cell migration involved in coronary angiogenesis	0	0	0	0	0	0
cell migration involved in coronary vasculogenesis	0	0	0	0	0	0
cell migration involved in endocardial cushion formation	0	0	0	0	0	0
cell migration involved in gastrulation	0	0	0	0	0	0
cellular amino acid metabolic process	0	0	0	0	0	0
cellular glucose homeostasis	0	0	0	0	0	0
cellular hypotonic salinity response	0	0	0	0	0	0
cellular response to ATP	0	0	0	0	0	0
cellular response to BMP stimulus	0	0	0	0	0	0
cellular response to UV	0	0	0	0	0	0
cellular response to X-ray	0	0	0	0	0	0
cellular response to alkaloid	0	0	0	0	0	0
cellular response to aluminum ion	0	0	0	0	0	0
cellular response to amino acid stimulus	0	0	0	0	0	0
cellular response to cAMP	0	0	0	0	0	0
cellular response to cGMP	0	0	0	0	0	0
cellular response to cadmium ion	0	0	0	0	0	0
cellular response to cobalt ion	0	0	0	0	0	0
cellular response to copper ion	0	0	0	0	0	0
cellular response to copper ion starvation	0	0	0	0	0	0
cellular response to ethanol	0	0	0	0	0	0
cellular response to exogenous dsRNA	0	0	0	0	0	0
cellular response to fibroblast growth factor stimulus	0	0	0	0	0	0
cellular response to heparin	0	0	0	0	0	0
cellular response to hepatocyte growth factor stimulus	0	0	0	0	0	0
cellular response to histamine	0	0	0	0	0	0
cellular response to hydrogen peroxide	0	0	0	0	0	0
cellular response to hydrostatic pressure	0	0	0	0	0	0
cellular response to hyperoxia	0	0	0	0	0	0
cellular response to hypoxia	0	0	0	0	0	0
cellular response to interferon-gamma	0	0	0	0	0	0
cellular response to interleukin-1	0	0	0	0	0	0
cellular response to interleukin-18	0	0	0	0	0	0
cellular response to iron ion	0	0	0	0	0	0
cellular response to iron ion starvation	0	0	0	0	0	0
cellular response to jasmonic acid stimulus	0	0	0	0	0	0
cellular response to leptin stimulus	0	0	0	0	0	0
cellular response to lipopolysaccharide	0	0	0	0	0	0
cellular response to macrophage colony-stimulating factor stimulus	0	0	0	0	0	0
cellular response to magnesium ion	0	0	0	0	0	0
cellular response to manganese ion	0	0	0	0	0	0
cellular response to mercury ion	0	0	0	0	0	0
cellular response to misfolded protein	0	0	0	0	0	0
cellular response to mycophenolic acid	0	0	0	0	0	0
cellular response to nitric oxide	0	0	0	0	0	0
cellular response to parathyroid hormone stimulus	0	0	0	0	0	0
cellular response to peptide hormone stimulus	0	0	0	0	0	0
cellular response to platelet-derived growth factor stimulus	0	0	0	0	0	0
cellular response to potassium ion starvation	0	0	0	0	0	0
cellular response to retinoic acid	0	0	0	0	0	0
cellular response to steroid hormone stimulus	0	0	0	0	0	0
cellular response to sucrose stimulus	0	0	0	0	0	0
cellular response to transforming growth factor beta stimulus	0	0	0	0	0	0
cellular response to trichostatin A	0	0	0	0	0	0
cellular response to triglyceride	0	0	0	0	0	0
cellular response to tumor necrosis factor	0	0	0	0	0	0
cellular response to type I interferon	0	0	0	0	0	0
cellular response to unfolded protein	0	0	0	0	0	0
cellular response to vascular endothelial growth factor stimulus	0	0	0	0	0	0
cellular response to water deprivation	0	0	0	0	0	0
cellular response to zinc ion	0	0	0	0	0	0
central nervous system myelin maintenance	0	0	0	0	0	0
centrosome-templated microtubule nucleation	0	0	0	0	0	0
ceramide metabolic process	0	0	0	0	0	0
cerebellar Purkinje cell differentiation	0	0	0	0	0	0
cerebellar granule cell differentiation	0	0	0	0	0	0
cerebral cortex neuron differentiation	0	0	0	0	0	0
chaperone-mediated protein complex assembly	0	0	0	0	0	0
chaperone-mediated protein folding	0	0	0	0	0	0
chemokine biosynthetic process	0	0	0	0	0	0
chemokine receptor transport out of membrane raft	0	0	0	0	0	0
chitin catabolic process	0	0	0	0	0	0
chloride transport	0	0	0	0	0	0
cholesterol biosynthetic process	0	0	0	0	0	0
cholesterol efflux	0	0	0	0	0	0
cholesterol esterification	0	0	0	0	0	0
cholesterol homeostasis	0	0	0	0	0	0
choline metabolic process	0	0	0	0	0	0
chondroitin sulfate biosynthetic process	0	0	0	0	0	0
chondroitin sulfate catabolic process	0	0	0	0	0	0
chromatin assembly	0	0	0	0	0	0
chromatin remodeling	0	0	0	0	0	0
circadian sleep/wake cycle, REM sleep	0	0	0	0	0	0
cis assembly of pre-catalytic spliceosome	0	0	0	0	0	0
co-translational protein modification	0	0	0	0	0	0
cobalt ion transport	0	0	0	0	0	0
commitment of neuronal cell to specific neuron type in forebrain	0	0	0	0	0	0
complement activation	0	0	0	0	0	0
connective tissue growth factor biosynthetic process	0	0	0	0	0	0
contractile actin filament bundle assembly	0	0	0	0	0	0
convergent extension involved in somitogenesis	0	0	0	0	0	0
copper ion transport	0	0	0	0	0	0
cortical microtubule organization	0	0	0	0	0	0
cortisol biosynthetic process	0	0	0	0	0	0
cristae formation	0	0	0	0	0	0
cytochrome complex assembly	0	0	0	0	0	0
cytokine secretion	0	0	0	0	0	0
cytokine-mediated signaling pathway	0	0	0	0	0	0
cytokinesis, actomyosin contractile ring assembly	0	0	0	0	0	0
cytoplasmic mRNA processing body assembly	0	0	0	0	0	0
de novo' protein folding	0	0	0	0	0	0
deadenylation-independent decapping of nuclear-transcribed mRNA	0	0	0	0	0	0
definitive erythrocyte differentiation	0	0	0	0	0	0
deoxyribonucleoside triphosphate metabolic process	0	0	0	0	0	0
detection of hypoxic conditions in blood by carotid body chemoreceptor signaling	0	0	0	0	0	0
detection of light stimulus involved in visual perception	0	0	0	0	0	0
detection of muramyl dipeptide	0	0	0	0	0	0
determination of affect	0	0	0	0	0	0
determination of digestive tract left/right asymmetry	0	0	0	0	0	0
determination of left/right asymmetry in nervous system	0	0	0	0	0	0
determination of liver left/right asymmetry	0	0	0	0	0	0
determination of pancreatic left/right asymmetry	0	0	0	0	0	0
diacylglycerol metabolic process	0	0	0	0	0	0
diapedesis	0	0	0	0	0	0
dicarboxylic acid transport	0	0	0	0	0	0
diphosphoinositol polyphosphate catabolic process	0	0	0	0	0	0
distal tubule morphogenesis	0	0	0	0	0	0
dopamine metabolic process	0	0	0	0	0	0
dopamine uptake involved in synaptic transmission	0	0	0	0	0	0
elastin biosynthetic process	0	0	0	0	0	0
embryonic skeletal limb joint morphogenesis	0	0	0	0	0	0
endocardial cell differentiation	0	0	0	0	0	0
endocardial cushion cell fate commitment	0	0	0	0	0	0
endoplasmic reticulum membrane fusion	0	0	0	0	0	0
endothelial cell apoptotic process	0	0	0	0	0	0
endothelin receptor signaling pathway	0	0	0	0	0	0
engulfment of apoptotic cell	0	0	0	0	0	0
enteric smooth muscle cell differentiation	0	0	0	0	0	0
enucleate erythrocyte development	0	0	0	0	0	0
enzyme active site formation via L-cysteine persulfide	0	0	0	0	0	0
epinephrine metabolic process	0	0	0	0	0	0
epithelial cell differentiation involved in mammary gland alveolus development	0	0	0	0	0	0
epithelial cell migration	0	0	0	0	0	0
epithelial cilium movement involved in determination of left/right asymmetry	0	0	0	0	0	0
epithelial to mesenchymal transition	0	0	0	0	0	0
ergosterol biosynthetic process	0	0	0	0	0	0
establishment of blood-nerve barrier	0	0	0	0	0	0
establishment of endothelial barrier	0	0	0	0	0	0
establishment of epithelial cell apical/basal polarity	0	0	0	0	0	0
establishment of meiotic spindle localization	0	0	0	0	0	0
estrogen biosynthetic process	0	0	0	0	0	0
ethanol catabolic process	0	0	0	0	0	0
ethanol oxidation	0	0	0	0	0	0
evasion or tolerance of host defenses by virus	0	0	0	0	0	0
extraocular skeletal muscle development	0	0	0	0	0	0
extrinsic apoptotic signaling pathway in absence of ligand	0	0	0	0	0	0
extrinsic apoptotic signaling pathway via death domain receptors	0	0	0	0	0	0
eye photoreceptor cell fate commitment	0	0	0	0	0	0
eye pigment biosynthetic process	0	0	0	0	0	0
farnesol catabolic process	0	0	0	0	0	0
farnesyl diphosphate biosynthetic process	0	0	0	0	0	0
fatty acid homeostasis	0	0	0	0	0	0
fatty acid transport	0	0	0	0	0	0
female meiosis sister chromatid cohesion	0	0	0	0	0	0
fever generation	0	0	0	0	0	0
fibroblast apoptotic process	0	0	0	0	0	0
fibroblast migration	0	0	0	0	0	0
follicle-stimulating hormone signaling pathway	0	0	0	0	0	0
forebrain astrocyte development	0	0	0	0	0	0
forebrain neuron development	0	0	0	0	0	0
forebrain radial glial cell differentiation	0	0	0	0	0	0
formate transport	0	0	0	0	0	0
formation of radial glial scaffolds	0	0	0	0	0	0
formation of translation initiation complex	0	0	0	0	0	0
fractalkine metabolic process	0	0	0	0	0	0
fructose metabolic process	0	0	0	0	0	0
fucose metabolic process	0	0	0	0	0	0
fumarate metabolic process	0	0	0	0	0	0
galactose metabolic process	0	0	0	0	0	0
gamma-delta T cell activation	0	0	0	0	0	0
gamma-tubulin complex localization	0	0	0	0	0	0
gene silencing	0	0	0	0	0	0
geranyl diphosphate biosynthetic process	0	0	0	0	0	0
germ-line stem cell maintenance	0	0	0	0	0	0
glial cell apoptotic process	0	0	0	0	0	0
glomerular parietal epithelial cell differentiation	0	0	0	0	0	0
glucosamine biosynthetic process	0	0	0	0	0	0
glucose metabolic process	0	0	0	0	0	0
glucose transport	0	0	0	0	0	0
glutathione transport	0	0	0	0	0	0
glycerol metabolic process	0	0	0	0	0	0
glycerol-3-phosphate catabolic process	0	0	0	0	0	0
glycerophospholipid biosynthetic process	0	0	0	0	0	0
glycogen metabolic process	0	0	0	0	0	0
glycosphingolipid metabolic process	0	0	0	0	0	0
granulocyte macrophage colony-stimulating factor biosynthetic process	0	0	0	0	0	0
growth plate cartilage chondrocyte differentiation	0	0	0	0	0	0
guanylate kinase-associated protein clustering	0	0	0	0	0	0
heart jogging	0	0	0	0	0	0
heart looping	0	0	0	0	0	0
hematopoietic stem cell migration to bone marrow	0	0	0	0	0	0
heme biosynthetic process	0	0	0	0	0	0
heme oxidation	0	0	0	0	0	0
heparan sulfate proteoglycan catabolic process	0	0	0	0	0	0
heparin biosynthetic process	0	0	0	0	0	0
hepatocyte apoptotic process	0	0	0	0	0	0
hexose biosynthetic process	0	0	0	0	0	0
hexose transmembrane transport	0	0	0	0	0	0
histamine uptake	0	0	0	0	0	0
histone modification	0	0	0	0	0	0
hormone secretion	0	0	0	0	0	0
hormone-mediated signaling pathway	0	0	0	0	0	0
humoral immune response mediated by circulating immunoglobulin	0	0	0	0	0	0
hyaluronan biosynthetic process	0	0	0	0	0	0
hypochlorous acid biosynthetic process	0	0	0	0	0	0
icosanoid metabolic process	0	0	0	0	0	0
immune response-activating cell surface receptor signaling pathway	0	0	0	0	0	0
immunoglobulin secretion	0	0	0	0	0	0
indolalkylamine biosynthetic process	0	0	0	0	0	0
induction of bacterial agglutination	0	0	0	0	0	0
induction of negative chemotaxis	0	0	0	0	0	0
induction of programmed cell death	0	0	0	0	0	0
inner cell mass cellular morphogenesis	0	0	0	0	0	0
inorganic diphosphate transport	0	0	0	0	0	0
inositol biosynthetic process	0	0	0	0	0	0
inositol phosphate biosynthetic process	0	0	0	0	0	0
inositol phosphate dephosphorylation	0	0	0	0	0	0
inositol phosphate-mediated signaling	0	0	0	0	0	0
inositol trisphosphate metabolic process	0	0	0	0	0	0
intein-mediated protein splicing	0	0	0	0	0	0
interferon-gamma biosynthetic process	0	0	0	0	0	0
interleukin-1 beta biosynthetic process	0	0	0	0	0	0
interleukin-13 biosynthetic process	0	0	0	0	0	0
interleukin-2 biosynthetic process	0	0	0	0	0	0
interleukin-6 biosynthetic process	0	0	0	0	0	0
interleukin-8 biosynthetic process	0	0	0	0	0	0
intestinal epithelial cell development	0	0	0	0	0	0
intestinal epithelial cell differentiation	0	0	0	0	0	0
intestinal epithelial cell maturation	0	0	0	0	0	0
intracellular cholesterol transport	0	0	0	0	0	0
intracellular distribution of mitochondria	0	0	0	0	0	0
intracellular transport of viral protein in host cell	0	0	0	0	0	0
intrinsic apoptotic signaling pathway by p53 class mediator	0	0	0	0	0	0
intrinsic apoptotic signaling pathway in response to DNA damage	0	0	0	0	0	0
intrinsic apoptotic signaling pathway in response to oxidative stress	0	0	0	0	0	0
iodide transport	0	0	0	0	0	0
ionotropic glutamate receptor signaling pathway	0	0	0	0	0	0
iron incorporation into metallo-sulfur cluster	0	0	0	0	0	0
iron ion homeostasis	0	0	0	0	0	0
iron ion transport	0	0	0	0	0	0
keratinocyte differentiation	0	0	0	0	0	0
kinetochore assembly	0	0	0	0	0	0
lactate transport	0	0	0	0	0	0
lateral motor column neuron migration	0	0	0	0	0	0
learning	0	0	0	0	0	0
left ventricular cardiac muscle tissue morphogenesis	0	0	0	0	0	0
lens fiber cell morphogenesis	0	0	0	0	0	0
leukocyte chemotaxis	0	0	0	0	0	0
leukocyte migration involved in immune response	0	0	0	0	0	0
long-chain fatty-acyl-CoA metabolic process	0	0	0	0	0	0
low-density lipoprotein particle receptor biosynthetic process	0	0	0	0	0	0
lung ciliated cell differentiation	0	0	0	0	0	0
lung goblet cell differentiation	0	0	0	0	0	0
luteinizing hormone signaling pathway	0	0	0	0	0	0
lymphatic endothelial cell differentiation	0	0	0	0	0	0
lymphocyte migration	0	0	0	0	0	0
lymphotoxin A biosynthetic process	0	0	0	0	0	0
mRNA metabolic process	0	0	0	0	0	0
mRNA transport	0	0	0	0	0	0
magnesium ion transport	0	0	0	0	0	0
maintenance of DNA methylation	0	0	0	0	0	0
maintenance of epithelial cell apical/basal polarity	0	0	0	0	0	0
maintenance of granzyme B location in T cell secretory granule	0	0	0	0	0	0
maintenance of protein location in plasma membrane	0	0	0	0	0	0
malate metabolic process	0	0	0	0	0	0
manganese ion transport	0	0	0	0	0	0
mannose metabolic process	0	0	0	0	0	0
mast cell differentiation	0	0	0	0	0	0
meiotic sister chromatid cohesion, centromeric	0	0	0	0	0	0
meiotic spindle organization	0	0	0	0	0	0
melatonin biosynthetic process	0	0	0	0	0	0
membrane raft polarization	0	0	0	0	0	0
memory	0	0	0	0	0	0
mesenchymal cell differentiation involved in kidney development	0	0	0	0	0	0
mesonephric tubule formation	0	0	0	0	0	0
metanephric DCT cell differentiation	0	0	0	0	0	0
metanephric connecting tubule development	0	0	0	0	0	0
metanephric glomerular endothelium development	0	0	0	0	0	0
metanephric glomerular mesangial cell development	0	0	0	0	0	0
metanephric nephron tubule formation	0	0	0	0	0	0
metanephric nephron tubule morphogenesis	0	0	0	0	0	0
metanephric proximal tubule development	0	0	0	0	0	0
metanephric smooth muscle tissue development	0	0	0	0	0	0
miRNA loading onto RISC involved in gene silencing by miRNA	0	0	0	0	0	0
microglial cell activation	0	0	0	0	0	0
microtubule depolymerization	0	0	0	0	0	0
microtubule-dependent intracellular transport of viral material towards nucleus	0	0	0	0	0	0
mineralocorticoid biosynthetic process	0	0	0	0	0	0
mineralocorticoid receptor signaling pathway	0	0	0	0	0	0
misfolded or incompletely synthesized protein catabolic process	0	0	0	0	0	0
mitochondrial protein processing	0	0	0	0	0	0
mitochondrial respiratory chain complex assembly	0	0	0	0	0	0
mitochondrial translation	0	0	0	0	0	0
mitotic centrosome separation	0	0	0	0	0	0
mitotic spindle organization	0	0	0	0	0	0
modification-dependent protein catabolic process	0	0	0	0	0	0
modulation by virus of host process	0	0	0	0	0	0
monocarboxylic acid metabolic process	0	0	0	0	0	0
monocyte aggregation	0	0	0	0	0	0
monoterpenoid metabolic process	0	0	0	0	0	0
muscle cell apoptotic process	0	0	0	0	0	0
muscle fiber development	0	0	0	0	0	0
muscle filament sliding	0	0	0	0	0	0
myeloid dendritic cell activation involved in immune response	0	0	0	0	0	0
myoblast migration	0	0	0	0	0	0
myofibril assembly	0	0	0	0	0	0
natural killer cell proliferation	0	0	0	0	0	0
ncRNA metabolic process	0	0	0	0	0	0
negative regulation of ATP citrate synthase activity	0	0	0	0	0	0
negative regulation of CD40 signaling pathway	0	0	0	0	0	0
negative regulation of DNA metabolic process	0	0	0	0	0	0
negative regulation of G-protein coupled receptor protein signaling pathway	0	0	0	0	0	0
negative regulation of G0 to G1 transition	0	0	0	0	0	0
negative regulation of GTP cyclohydrolase I activity	0	0	0	0	0	0
negative regulation of MHC class II biosynthetic process	0	0	0	0	0	0
negative regulation of NAD(P)H oxidase activity	0	0	0	0	0	0
negative regulation of SNARE complex assembly	0	0	0	0	0	0
negative regulation of T cell cytokine production	0	0	0	0	0	0
negative regulation of T cell mediated cytotoxicity	0	0	0	0	0	0
negative regulation of TOR signaling	0	0	0	0	0	0
negative regulation of Wnt signaling pathway	0	0	0	0	0	0
negative regulation of actin filament bundle assembly	0	0	0	0	0	0
negative regulation of angiogenesis	0	0	0	0	0	0
negative regulation of apoptotic process	0	0	0	0	0	0
negative regulation of apoptotic signaling pathway	0	0	0	0	0	0
negative regulation of bone resorption	0	0	0	0	0	0
negative regulation of calcium-independent cell-cell adhesion	0	0	0	0	0	0
negative regulation of cell migration	0	0	0	0	0	0
negative regulation of cell proliferation involved in mesonephros development	0	0	0	0	0	0
negative regulation of cell-cell adhesion mediated by cadherin	0	0	0	0	0	0
negative regulation of cellular protein metabolic process	0	0	0	0	0	0
negative regulation of cellular response to growth factor stimulus	0	0	0	0	0	0
negative regulation of cellular senescence	0	0	0	0	0	0
negative regulation of cerebellar granule cell precursor proliferation	0	0	0	0	0	0
negative regulation of chemokine (C-C motif) ligand 5 production	0	0	0	0	0	0
negative regulation of chemokine (C-X-C motif) ligand 2 production	0	0	0	0	0	0
negative regulation of collagen catabolic process	0	0	0	0	0	0
negative regulation of cyclic-nucleotide phosphodiesterase activity	0	0	0	0	0	0
negative regulation of cytokine activity	0	0	0	0	0	0
negative regulation of cytokine biosynthetic process	0	0	0	0	0	0
negative regulation of defense response to virus	0	0	0	0	0	0
negative regulation of dendritic cell cytokine production	0	0	0	0	0	0
negative regulation of dendritic cell dendrite assembly	0	0	0	0	0	0
negative regulation of dermatome development	0	0	0	0	0	0
negative regulation of determination of dorsal identity	0	0	0	0	0	0
negative regulation of endothelial cell differentiation	0	0	0	0	0	0
negative regulation of entry of bacterium into host cell	0	0	0	0	0	0
negative regulation of epidermal cell differentiation	0	0	0	0	0	0
negative regulation of epithelial cell proliferation involved in lung morphogenesis	0	0	0	0	0	0
negative regulation of epithelial cell proliferation involved in prostate gland development	0	0	0	0	0	0
negative regulation of estrogen receptor binding	0	0	0	0	0	0
negative regulation of exocytosis	0	0	0	0	0	0
negative regulation of filopodium assembly	0	0	0	0	0	0
negative regulation of gene expression, epigenetic	0	0	0	0	0	0
negative regulation of glomerulus development	0	0	0	0	0	0
negative regulation of glycogen (starch) synthase activity	0	0	0	0	0	0
negative regulation of growth of symbiont on or near host surface	0	0	0	0	0	0
negative regulation of guanylate cyclase activity	0	0	0	0	0	0
negative regulation of hair follicle development	0	0	0	0	0	0
negative regulation of hepatocyte proliferation	0	0	0	0	0	0
negative regulation of homotypic cell-cell adhesion	0	0	0	0	0	0
negative regulation of hydrogen peroxide metabolic process	0	0	0	0	0	0
negative regulation of inflammatory response	0	0	0	0	0	0
negative regulation of innate immune response	0	0	0	0	0	0
negative regulation of integrin biosynthetic process	0	0	0	0	0	0
negative regulation of interferon-beta production	0	0	0	0	0	0
negative regulation of intracellular steroid hormone receptor signaling pathway	0	0	0	0	0	0
negative regulation of lamellipodium assembly	0	0	0	0	0	0
negative regulation of lamellipodium morphogenesis	0	0	0	0	0	0
negative regulation of lipase activity	0	0	0	0	0	0
negative regulation of lymphocyte activation	0	0	0	0	0	0
negative regulation of macrophage activation	0	0	0	0	0	0
negative regulation of mammary gland epithelial cell proliferation	0	0	0	0	0	0
negative regulation of mast cell activation	0	0	0	0	0	0
negative regulation of mast cell cytokine production	0	0	0	0	0	0
negative regulation of mast cell proliferation	0	0	0	0	0	0
negative regulation of megakaryocyte differentiation	0	0	0	0	0	0
negative regulation of meiosis	0	0	0	0	0	0
negative regulation of mesenchymal cell proliferation	0	0	0	0	0	0
negative regulation of mesenchymal stem cell differentiation	0	0	0	0	0	0
negative regulation of metanephric S-shaped body morphogenesis	0	0	0	0	0	0
negative regulation of metanephric comma-shaped body morphogenesis	0	0	0	0	0	0
negative regulation of mitochondrial fusion	0	0	0	0	0	0
negative regulation of mitosis	0	0	0	0	0	0
negative regulation of monocyte chemotactic protein-1 production	0	0	0	0	0	0
negative regulation of mononuclear cell proliferation	0	0	0	0	0	0
negative regulation of monooxygenase activity	0	0	0	0	0	0
negative regulation of mucus secretion	0	0	0	0	0	0
negative regulation of muscle contraction	0	0	0	0	0	0
negative regulation of muscle hyperplasia	0	0	0	0	0	0
negative regulation of muscle hypertrophy	0	0	0	0	0	0
negative regulation of myeloid dendritic cell activation	0	0	0	0	0	0
negative regulation of myeloid leukocyte differentiation	0	0	0	0	0	0
negative regulation of necroptotic process	0	0	0	0	0	0
negative regulation of neurogenesis	0	0	0	0	0	0
negative regulation of nitric oxide biosynthetic process	0	0	0	0	0	0
negative regulation of nitric-oxide synthase biosynthetic process	0	0	0	0	0	0
negative regulation of nuclease activity	0	0	0	0	0	0
negative regulation of odontogenesis	0	0	0	0	0	0
negative regulation of osteoclast proliferation	0	0	0	0	0	0
negative regulation of pancreatic juice secretion	0	0	0	0	0	0
negative regulation of peptidase activity	0	0	0	0	0	0
negative regulation of protein localization to cell surface	0	0	0	0	0	0
negative regulation of protein processing	0	0	0	0	0	0
negative regulation of protein transport	0	0	0	0	0	0
negative regulation of receptor activity	0	0	0	0	0	0
negative regulation of receptor catabolic process	0	0	0	0	0	0
negative regulation of receptor recycling	0	0	0	0	0	0
negative regulation of release of cytochrome c from mitochondria	0	0	0	0	0	0
negative regulation of retinal cell programmed cell death	0	0	0	0	0	0
negative regulation of retinoic acid receptor signaling pathway	0	0	0	0	0	0
negative regulation of ruffle assembly	0	0	0	0	0	0
negative regulation of serotonin secretion	0	0	0	0	0	0
negative regulation of single stranded viral RNA replication via double stranded DNA intermediate	0	0	0	0	0	0
negative regulation of sister chromatid cohesion	0	0	0	0	0	0
negative regulation of small GTPase mediated signal transduction	0	0	0	0	0	0
negative regulation of smooth muscle cell differentiation	0	0	0	0	0	0
negative regulation of striated muscle tissue development	0	0	0	0	0	0
negative regulation of synapse assembly	0	0	0	0	0	0
negative regulation of synapse maturation	0	0	0	0	0	0
negative regulation of testicular blood vessel morphogenesis	0	0	0	0	0	0
negative regulation of thymidylate synthase biosynthetic process	0	0	0	0	0	0
negative regulation of tooth mineralization	0	0	0	0	0	0
negative regulation of transforming growth factor beta1 production	0	0	0	0	0	0
negative regulation of transforming growth factor beta2 production	0	0	0	0	0	0
negative regulation of transforming growth factor beta3 production	0	0	0	0	0	0
negative regulation of vascular permeability	0	0	0	0	0	0
nephron tubule epithelial cell differentiation	0	0	0	0	0	0
neural crest cell migration	0	0	0	0	0	0
neurexin clustering	0	0	0	0	0	0
neuroepithelial cell differentiation	0	0	0	0	0	0
neuroligin clustering	0	0	0	0	0	0
neuron apoptotic process	0	0	0	0	0	0
neuron projection morphogenesis	0	0	0	0	0	0
neuropeptide catabolic process	0	0	0	0	0	0
neuropeptide signaling pathway	0	0	0	0	0	0
neurotransmitter receptor biosynthetic process	0	0	0	0	0	0
neurotransmitter secretion	0	0	0	0	0	0
neurotrophin signaling pathway	0	0	0	0	0	0
nicotinamide riboside catabolic process	0	0	0	0	0	0
nitrate catabolic process	0	0	0	0	0	0
non-canonical Wnt signaling pathway	0	0	0	0	0	0
norepinephrine metabolic process	0	0	0	0	0	0
norepinephrine secretion	0	0	0	0	0	0
nuclear pore distribution	0	0	0	0	0	0
nuclear retention of unspliced pre-mRNA at the site of transcription	0	0	0	0	0	0
nucleoside triphosphate catabolic process	0	0	0	0	0	0
nucleosome assembly	0	0	0	0	0	0
nucleotide metabolic process	0	0	0	0	0	0
organ induction	0	0	0	0	0	0
orthogonal dichotomous subdivision of terminal units involved in lung branching morphogenesis	0	0	0	0	0	0
osteoclast differentiation	0	0	0	0	0	0
oxaloacetate metabolic process	0	0	0	0	0	0
oxidative stress-induced premature senescence	0	0	0	0	0	0
pancreatic A cell development	0	0	0	0	0	0
parallel actin filament bundle assembly	0	0	0	0	0	0
pentacyclic triterpenoid metabolic process	0	0	0	0	0	0
pentose biosynthetic process	0	0	0	0	0	0
pentose-phosphate shunt, non-oxidative branch	0	0	0	0	0	0
pentose-phosphate shunt, oxidative branch	0	0	0	0	0	0
peptide amidation	0	0	0	0	0	0
peptide antigen stabilization	0	0	0	0	0	0
peptidyl-cysteine S-nitrosylation	0	0	0	0	0	0
peptidyl-lysine modification	0	0	0	0	0	0
peptidyl-methionine modification	0	0	0	0	0	0
peptidyl-proline modification	0	0	0	0	0	0
peptidyl-pyrromethane cofactor linkage	0	0	0	0	0	0
peptidyl-tyrosine sulfation	0	0	0	0	0	0
peroxisome transport along microtubule	0	0	0	0	0	0
phagosome-lysosome fusion	0	0	0	0	0	0
phosphate ion transport	0	0	0	0	0	0
phosphatidylinositol metabolic process	0	0	0	0	0	0
phosphatidylinositol-mediated signaling	0	0	0	0	0	0
phosphatidylserine exposure on apoptotic cell surface	0	0	0	0	0	0
phospholipase C-activating G-protein coupled receptor signaling pathway	0	0	0	0	0	0
phospholipase C-inhibiting G-protein coupled receptor signaling pathway	0	0	0	0	0	0
phospholipase D-activating G-protein coupled receptor signaling pathway	0	0	0	0	0	0
phospholipid transport	0	0	0	0	0	0
phototransduction, visible light	0	0	0	0	0	0
phthalate metabolic process	0	0	0	0	0	0
planar dichotomous subdivision of terminal units involved in lung branching morphogenesis	0	0	0	0	0	0
plasma lipoprotein particle oxidation	0	0	0	0	0	0
platelet degranulation	0	0	0	0	0	0
polyubiquitinated misfolded protein transport	0	0	0	0	0	0
positive regulation of B cell activation	0	0	0	0	0	0
positive regulation of B cell tolerance induction	0	0	0	0	0	0
positive regulation of DNA metabolic process	0	0	0	0	0	0
positive regulation of Fc receptor mediated stimulatory signaling pathway	0	0	0	0	0	0
positive regulation of G-protein coupled receptor protein signaling pathway	0	0	0	0	0	0
positive regulation of G0 to G1 transition	0	0	0	0	0	0
positive regulation of IP-10 production	0	0	0	0	0	0
positive regulation of MHC class I biosynthetic process	0	0	0	0	0	0
positive regulation of MHC class II biosynthetic process	0	0	0	0	0	0
positive regulation of NAD+ ADP-ribosyltransferase activity	0	0	0	0	0	0
positive regulation of NIK/NF-kappaB signaling	0	0	0	0	0	0
positive regulation of TOR signaling	0	0	0	0	0	0
positive regulation of Wnt signaling pathway	0	0	0	0	0	0
positive regulation of actin filament bundle assembly	0	0	0	0	0	0
positive regulation of adenylate cyclase activity	0	0	0	0	0	0
positive regulation of angiogenesis	0	0	0	0	0	0
positive regulation of antigen processing and presentation of peptide antigen via MHC class I	0	0	0	0	0	0
positive regulation of antigen processing and presentation of peptide antigen via MHC class II	0	0	0	0	0	0
positive regulation of apoptotic process	0	0	0	0	0	0
positive regulation of apoptotic signaling pathway	0	0	0	0	0	0
positive regulation of behavioral fear response	0	0	0	0	0	0
positive regulation of blood coagulation	0	0	0	0	0	0
positive regulation of bone resorption	0	0	0	0	0	0
positive regulation of branching involved in lung morphogenesis	0	0	0	0	0	0
positive regulation of branching involved in ureteric bud morphogenesis	0	0	0	0	0	0
positive regulation of brown fat cell differentiation	0	0	0	0	0	0
positive regulation of cAMP-mediated signaling	0	0	0	0	0	0
positive regulation of calcium-dependent cell-cell adhesion	0	0	0	0	0	0
positive regulation of cardiolipin metabolic process	0	0	0	0	0	0
positive regulation of cell cycle arrest	0	0	0	0	0	0
positive regulation of cell fate specification	0	0	0	0	0	0
positive regulation of cell migration	0	0	0	0	0	0
positive regulation of cell-cell adhesion mediated by integrin	0	0	0	0	0	0
positive regulation of cellular glucuronidation	0	0	0	0	0	0
positive regulation of cellular protein metabolic process	0	0	0	0	0	0
positive regulation of cellular senescence	0	0	0	0	0	0
positive regulation of cerebellar granule cell precursor proliferation	0	0	0	0	0	0
positive regulation of chemokine (C-C motif) ligand 5 production	0	0	0	0	0	0
positive regulation of chemokine (C-X-C motif) ligand 1 production	0	0	0	0	0	0
positive regulation of chromatin assembly or disassembly	0	0	0	0	0	0
positive regulation of cyclic-nucleotide phosphodiesterase activity	0	0	0	0	0	0
positive regulation of cytokine activity	0	0	0	0	0	0
positive regulation of cytokine biosynthetic process	0	0	0	0	0	0
positive regulation of deacetylase activity	0	0	0	0	0	0
positive regulation of dendritic cell cytokine production	0	0	0	0	0	0
positive regulation of dendritic cell dendrite assembly	0	0	0	0	0	0
positive regulation of dipeptide transmembrane transport	0	0	0	0	0	0
positive regulation of early endosome to late endosome transport	0	0	0	0	0	0
positive regulation of endocytic recycling	0	0	0	0	0	0
positive regulation of endocytosis	0	0	0	0	0	0
positive regulation of endothelial cell differentiation	0	0	0	0	0	0
positive regulation of endothelial cell proliferation	0	0	0	0	0	0
positive regulation of ephrin receptor signaling pathway	0	0	0	0	0	0
positive regulation of epithelial cell proliferation involved in prostate gland development	0	0	0	0	0	0
positive regulation of epithelial cell proliferation involved in wound healing	0	0	0	0	0	0
positive regulation of establishment of protein localization to plasma membrane	0	0	0	0	0	0
positive regulation of extracellular matrix constituent secretion	0	0	0	0	0	0
positive regulation of female receptivity	0	0	0	0	0	0
positive regulation of fibroblast growth factor receptor signaling pathway	0	0	0	0	0	0
positive regulation of filopodium assembly	0	0	0	0	0	0
positive regulation of gamma-aminobutyric acid secretion	0	0	0	0	0	0
positive regulation of gene expression involved in extracellular matrix organization	0	0	0	0	0	0
positive regulation of glomerulus development	0	0	0	0	0	0
positive regulation of glutamate metabolic process	0	0	0	0	0	0
positive regulation of glutamate receptor signaling pathway	0	0	0	0	0	0
positive regulation of glycogen (starch) synthase activity	0	0	0	0	0	0
positive regulation of granulocyte colony-stimulating factor production	0	0	0	0	0	0
positive regulation of granzyme A production	0	0	0	0	0	0
positive regulation of granzyme B production	0	0	0	0	0	0
positive regulation of growth hormone receptor signaling pathway	0	0	0	0	0	0
positive regulation of guanylate cyclase activity	0	0	0	0	0	0
positive regulation of hair follicle development	0	0	0	0	0	0
positive regulation of hepatocyte proliferation	0	0	0	0	0	0
positive regulation of heterotypic cell-cell adhesion	0	0	0	0	0	0
positive regulation of hippo signaling	0	0	0	0	0	0
positive regulation of homotypic cell-cell adhesion	0	0	0	0	0	0
positive regulation of hormone secretion	0	0	0	0	0	0
positive regulation of humoral immune response mediated by circulating immunoglobulin	0	0	0	0	0	0
positive regulation of hyaluronan biosynthetic process	0	0	0	0	0	0
positive regulation of hydrogen peroxide biosynthetic process	0	0	0	0	0	0
positive regulation of hydrogen peroxide-mediated programmed cell death	0	0	0	0	0	0
positive regulation of immunoglobulin production	0	0	0	0	0	0
positive regulation of immunological synapse formation	0	0	0	0	0	0
positive regulation of inflammatory response	0	0	0	0	0	0
positive regulation of innate immune response	0	0	0	0	0	0
positive regulation of inositol phosphate biosynthetic process	0	0	0	0	0	0
positive regulation of insulin-like growth factor receptor signaling pathway	0	0	0	0	0	0
positive regulation of integrin biosynthetic process	0	0	0	0	0	0
positive regulation of integrin-mediated signaling pathway	0	0	0	0	0	0
positive regulation of intermediate filament depolymerization	0	0	0	0	0	0
positive regulation of intestinal epithelial structure maintenance	0	0	0	0	0	0
positive regulation of ion transmembrane transport	0	0	0	0	0	0
positive regulation of ion transmembrane transporter activity	0	0	0	0	0	0
positive regulation of keratinocyte proliferation	0	0	0	0	0	0
positive regulation of lamellipodium assembly	0	0	0	0	0	0
positive regulation of lens epithelial cell proliferation	0	0	0	0	0	0
positive regulation of leukocyte mediated cytotoxicity	0	0	0	0	0	0
positive regulation of lipid biosynthetic process	0	0	0	0	0	0
positive regulation of lipoprotein lipase activity	0	0	0	0	0	0
positive regulation of lung goblet cell differentiation	0	0	0	0	0	0
positive regulation of lymphangiogenesis	0	0	0	0	0	0
positive regulation of macrophage fusion	0	0	0	0	0	0
positive regulation of macrophage tolerance induction	0	0	0	0	0	0
positive regulation of mammary gland epithelial cell proliferation	0	0	0	0	0	0
positive regulation of mast cell activation	0	0	0	0	0	0
positive regulation of mast cell proliferation	0	0	0	0	0	0
positive regulation of meiosis	0	0	0	0	0	0
positive regulation of melanocyte differentiation	0	0	0	0	0	0
positive regulation of membrane depolarization involved in regulation of cardiac muscle cell action potential	0	0	0	0	0	0
positive regulation of mesenchymal cell proliferation	0	0	0	0	0	0
positive regulation of metanephric ureteric bud development	0	0	0	0	0	0
positive regulation of miRNA metabolic process	0	0	0	0	0	0
positive regulation of mitochondrial depolarization	0	0	0	0	0	0
positive regulation of mitochondrial fission	0	0	0	0	0	0
positive regulation of mitochondrial membrane permeability	0	0	0	0	0	0
positive regulation of mitosis	0	0	0	0	0	0
positive regulation of mitotic cell cycle, embryonic	0	0	0	0	0	0
positive regulation of monocyte chemotactic protein-1 production	0	0	0	0	0	0
positive regulation of mononuclear cell proliferation	0	0	0	0	0	0
positive regulation of monooxygenase activity	0	0	0	0	0	0
positive regulation of mucus secretion	0	0	0	0	0	0
positive regulation of myeloid dendritic cell activation	0	0	0	0	0	0
positive regulation of myeloid leukocyte differentiation	0	0	0	0	0	0
positive regulation of necroptotic process	0	0	0	0	0	0
positive regulation of neurogenesis	0	0	0	0	0	0
positive regulation of nitric oxide biosynthetic process	0	0	0	0	0	0
positive regulation of nitric-oxide synthase biosynthetic process	0	0	0	0	0	0
positive regulation of nuclease activity	0	0	0	0	0	0
positive regulation of nucleocytoplasmic transport	0	0	0	0	0	0
positive regulation of nucleoside transport	0	0	0	0	0	0
positive regulation of nucleotide-binding oligomerization domain containing 1 signaling pathway	0	0	0	0	0	0
positive regulation of nucleotide-binding oligomerization domain containing 2 signaling pathway	0	0	0	0	0	0
positive regulation of oocyte development	0	0	0	0	0	0
positive regulation of optic nerve formation	0	0	0	0	0	0
positive regulation of oxidative phosphorylation uncoupler activity	0	0	0	0	0	0
positive regulation of pancreatic juice secretion	0	0	0	0	0	0
positive regulation of pancreatic stellate cell proliferation	0	0	0	0	0	0
positive regulation of peptidase activity	0	0	0	0	0	0
positive regulation of peptide secretion	0	0	0	0	0	0
positive regulation of peroxisome proliferator activated receptor signaling pathway	0	0	0	0	0	0
positive regulation of phosphatidylinositol 3-kinase signaling	0	0	0	0	0	0
positive regulation of phospholipid scramblase activity	0	0	0	0	0	0
positive regulation of podosome assembly	0	0	0	0	0	0
positive regulation of polarized epithelial cell differentiation	0	0	0	0	0	0
positive regulation of prostaglandin-E synthase activity	0	0	0	0	0	0
positive regulation of prostaglandin-endoperoxide synthase activity	0	0	0	0	0	0
positive regulation of protein homooligomerization	0	0	0	0	0	0
positive regulation of protein transport	0	0	0	0	0	0
positive regulation of receptor activity	0	0	0	0	0	0
positive regulation of response to DNA damage stimulus	0	0	0	0	0	0
positive regulation of ruffle assembly	0	0	0	0	0	0
positive regulation of satellite cell activation involved in skeletal muscle regeneration	0	0	0	0	0	0
positive regulation of semaphorin-plexin signaling pathway involved in outflow tract morphogenesis	0	0	0	0	0	0
positive regulation of single stranded viral RNA replication via double stranded DNA intermediate	0	0	0	0	0	0
positive regulation of skeletal muscle tissue regeneration	0	0	0	0	0	0
positive regulation of small GTPase mediated signal transduction	0	0	0	0	0	0
positive regulation of smooth muscle cell differentiation	0	0	0	0	0	0
positive regulation of spindle checkpoint	0	0	0	0	0	0
positive regulation of steroid metabolic process	0	0	0	0	0	0
positive regulation of striated muscle tissue development	0	0	0	0	0	0
positive regulation of thyroid hormone generation	0	0	0	0	0	0
positive regulation of tolerance induction to self antigen	0	0	0	0	0	0
positive regulation of tooth mineralization	0	0	0	0	0	0
positive regulation of transforming growth factor beta1 production	0	0	0	0	0	0
positive regulation of transforming growth factor beta2 production	0	0	0	0	0	0
positive regulation of transforming growth factor beta3 production	0	0	0	0	0	0
positive regulation of transmission of nerve impulse	0	0	0	0	0	0
positive regulation of type B pancreatic cell development	0	0	0	0	0	0
positive regulation of ureteric bud formation	0	0	0	0	0	0
positive regulation of urothelial cell proliferation	0	0	0	0	0	0
positive regulation of vascular endothelial growth factor receptor signaling pathway	0	0	0	0	0	0
positive regulation of vascular endothelial growth factor signaling pathway	0	0	0	0	0	0
positive regulation of vesicle fusion	0	0	0	0	0	0
positive regulation of vitamin D 24-hydroxylase activity	0	0	0	0	0	0
positive regulation of white fat cell proliferation	0	0	0	0	0	0
post-translational protein modification	0	0	0	0	0	0
posterior compartment specification	0	0	0	0	0	0
posttranslational protein targeting to membrane, translocation	0	0	0	0	0	0
potassium ion transport	0	0	0	0	0	0
primary heart field specification	0	0	0	0	0	0
primitive erythrocyte differentiation	0	0	0	0	0	0
primitive hemopoiesis	0	0	0	0	0	0
pro-T cell differentiation	0	0	0	0	0	0
progesterone metabolic process	0	0	0	0	0	0
pronephric field specification	0	0	0	0	0	0
proprioception involved in equilibrioception	0	0	0	0	0	0
prostate epithelial cord arborization involved in prostate glandular acinus morphogenesis	0	0	0	0	0	0
prostate epithelial cord elongation	0	0	0	0	0	0
prostatic bud formation	0	0	0	0	0	0
proteasomal protein catabolic process	0	0	0	0	0	0
proteasome assembly	0	0	0	0	0	0
protein acetylation	0	0	0	0	0	0
protein adenylylation	0	0	0	0	0	0
protein amidation	0	0	0	0	0	0
protein autoprocessing	0	0	0	0	0	0
protein deacetylation	0	0	0	0	0	0
protein deamination	0	0	0	0	0	0
protein deglycosylation	0	0	0	0	0	0
protein demethylation	0	0	0	0	0	0
protein dephosphorylation	0	0	0	0	0	0
protein glycosylation	0	0	0	0	0	0
protein heterooligomerization	0	0	0	0	0	0
protein hexamerization	0	0	0	0	0	0
protein homooligomerization	0	0	0	0	0	0
protein hydroxylation	0	0	0	0	0	0
protein import into mitochondrial inner membrane	0	0	0	0	0	0
protein import into mitochondrial matrix	0	0	0	0	0	0
protein import into mitochondrial outer membrane	0	0	0	0	0	0
protein import into nucleus	0	0	0	0	0	0
protein import into nucleus, docking	0	0	0	0	0	0
protein import into peroxisome matrix, substrate release	0	0	0	0	0	0
protein insertion into mitochondrial membrane involved in apoptotic signaling pathway	0	0	0	0	0	0
protein kinase A signaling	0	0	0	0	0	0
protein kinase B signaling	0	0	0	0	0	0
protein kinase C deactivation	0	0	0	0	0	0
protein kinase C signaling	0	0	0	0	0	0
protein kinase C-activating G-protein coupled receptor signaling pathway	0	0	0	0	0	0
protein lipidation	0	0	0	0	0	0
protein lipoylation	0	0	0	0	0	0
protein localization to centrosome	0	0	0	0	0	0
protein localization to chromosome	0	0	0	0	0	0
protein localization to cilium	0	0	0	0	0	0
protein localization to lysosome	0	0	0	0	0	0
protein localization to plasma membrane	0	0	0	0	0	0
protein maturation by protein folding	0	0	0	0	0	0
protein methylation	0	0	0	0	0	0
protein modification by small protein conjugation	0	0	0	0	0	0
protein oxidation	0	0	0	0	0	0
protein phosphorylation	0	0	0	0	0	0
protein polymerization	0	0	0	0	0	0
protein secretion by platelet	0	0	0	0	0	0
protein targeting to ER	0	0	0	0	0	0
protein targeting to lysosome	0	0	0	0	0	0
protein targeting to membrane	0	0	0	0	0	0
protein targeting to mitochondrion	0	0	0	0	0	0
protein targeting to peroxisome	0	0	0	0	0	0
protein tetramerization	0	0	0	0	0	0
protein-FAD linkage	0	0	0	0	0	0
protein-chromophore linkage	0	0	0	0	0	0
protein-pyridoxal-5-phosphate linkage	0	0	0	0	0	0
protoporphyrinogen IX biosynthetic process	0	0	0	0	0	0
pseudouridine synthesis	0	0	0	0	0	0
pulmonary artery endothelial tube morphogenesis	0	0	0	0	0	0
purine nucleobase metabolic process	0	0	0	0	0	0
purine ribonucleotide transport	0	0	0	0	0	0
quinolinate metabolic process	0	0	0	0	0	0
rRNA transport	0	0	0	0	0	0
receptor guanylyl cyclase signaling pathway	0	0	0	0	0	0
receptor internalization involved in canonical Wnt signaling pathway	0	0	0	0	0	0
recruitment of mRNA capping enzyme to RNA polymerase II holoenzyme complex	0	0	0	0	0	0
red, far-red light phototransduction	0	0	0	0	0	0
regulated secretory pathway	0	0	0	0	0	0
regulation of ATP:ADP antiporter activity	0	0	0	0	0	0
regulation of B cell cytokine production	0	0	0	0	0	0
regulation of B cell proliferation	0	0	0	0	0	0
regulation of BMP signaling pathway	0	0	0	0	0	0
regulation of DNA damage checkpoint	0	0	0	0	0	0
regulation of DNA damage response, signal transduction by p53 class mediator	0	0	0	0	0	0
regulation of DNA recombination	0	0	0	0	0	0
regulation of DNA repair	0	0	0	0	0	0
regulation of DNA replication	0	0	0	0	0	0
regulation of G2/M transition of mitotic cell cycle	0	0	0	0	0	0
regulation of GTP catabolic process	0	0	0	0	0	0
regulation of I-kappaB kinase/NF-kappaB signaling	0	0	0	0	0	0
regulation of JAK-STAT cascade	0	0	0	0	0	0
regulation of MAPK cascade	0	0	0	0	0	0
regulation of MyD88-dependent toll-like receptor signaling pathway	0	0	0	0	0	0
regulation of MyD88-independent toll-like receptor signaling pathway	0	0	0	0	0	0
regulation of RIG-I signaling pathway	0	0	0	0	0	0
regulation of RNA biosynthetic process	0	0	0	0	0	0
regulation of Ras protein signal transduction	0	0	0	0	0	0
regulation of T cell activation	0	0	0	0	0	0
regulation of T cell anergy	0	0	0	0	0	0
regulation of actin cytoskeleton organization by cell-cell adhesion	0	0	0	0	0	0
regulation of actin filament length	0	0	0	0	0	0
regulation of actin nucleation	0	0	0	0	0	0
regulation of acyl-CoA biosynthetic process	0	0	0	0	0	0
regulation of adrenergic receptor signaling pathway	0	0	0	0	0	0
regulation of aldosterone metabolic process	0	0	0	0	0	0
regulation of apoptosis involved in tissue homeostasis	0	0	0	0	0	0
regulation of autophagic vacuole assembly	0	0	0	0	0	0
regulation of blood volume by renal aldosterone	0	0	0	0	0	0
regulation of branch elongation involved in ureteric bud branching	0	0	0	0	0	0
regulation of branching involved in salivary gland morphogenesis by epithelial-mesenchymal signaling	0	0	0	0	0	0
regulation of branching involved in salivary gland morphogenesis by extracellular matrix-epithelial cell signaling	0	0	0	0	0	0
regulation of calcium ion transport	0	0	0	0	0	0
regulation of calcium ion-dependent exocytosis	0	0	0	0	0	0
regulation of canonical Wnt signaling pathway	0	0	0	0	0	0
regulation of cardiac muscle cell proliferation	0	0	0	0	0	0
regulation of cation channel activity	0	0	0	0	0	0
regulation of cell motility involved in somitogenic axis elongation	0	0	0	0	0	0
regulation of centriole-centriole cohesion	0	0	0	0	0	0
regulation of centrosome cycle	0	0	0	0	0	0
regulation of ceramide biosynthetic process	0	0	0	0	0	0
regulation of cholesterol metabolic process	0	0	0	0	0	0
regulation of cholesterol transport	0	0	0	0	0	0
regulation of chondrocyte development	0	0	0	0	0	0
regulation of chromatin assembly	0	0	0	0	0	0
regulation of chromosome condensation	0	0	0	0	0	0
regulation of chronic inflammatory response	0	0	0	0	0	0
regulation of clathrin-mediated endocytosis	0	0	0	0	0	0
regulation of cohesin localization to chromatin	0	0	0	0	0	0
regulation of complement activation	0	0	0	0	0	0
regulation of defense response to virus by host	0	0	0	0	0	0
regulation of dephosphorylation	0	0	0	0	0	0
regulation of dopamine metabolic process	0	0	0	0	0	0
regulation of dopamine receptor signaling pathway	0	0	0	0	0	0
regulation of dopamine secretion	0	0	0	0	0	0
regulation of endocannabinoid signaling pathway	0	0	0	0	0	0
regulation of endodeoxyribonuclease activity	0	0	0	0	0	0
regulation of endodermal cell fate specification	0	0	0	0	0	0
regulation of endopeptidase activity	0	0	0	0	0	0
regulation of endoribonuclease activity	0	0	0	0	0	0
regulation of epidermal growth factor receptor signaling pathway	0	0	0	0	0	0
regulation of epithelial cell migration	0	0	0	0	0	0
regulation of epithelial to mesenchymal transition	0	0	0	0	0	0
regulation of exit from mitosis	0	0	0	0	0	0
regulation of exocyst assembly	0	0	0	0	0	0
regulation of extrinsic apoptotic signaling pathway	0	0	0	0	0	0
regulation of fatty acid biosynthetic process	0	0	0	0	0	0
regulation of fatty acid transport	0	0	0	0	0	0
regulation of fibroblast growth factor receptor signaling pathway involved in neural plate anterior/posterior pattern formation	0	0	0	0	0	0
regulation of gliogenesis	0	0	0	0	0	0
regulation of glomerular mesangial cell proliferation	0	0	0	0	0	0
regulation of glucocorticoid metabolic process	0	0	0	0	0	0
regulation of glucose metabolic process	0	0	0	0	0	0
regulation of glutamate secretion	0	0	0	0	0	0
regulation of growth hormone secretion	0	0	0	0	0	0
regulation of heart rate by chemical signal	0	0	0	0	0	0
regulation of hemoglobin biosynthetic process	0	0	0	0	0	0
regulation of histone modification	0	0	0	0	0	0
regulation of inositol trisphosphate biosynthetic process	0	0	0	0	0	0
regulation of insulin secretion	0	0	0	0	0	0
regulation of interleukin-1-mediated signaling pathway	0	0	0	0	0	0
regulation of intracellular protein transport	0	0	0	0	0	0
regulation of intrinsic apoptotic signaling pathway	0	0	0	0	0	0
regulation of kinetochore assembly	0	0	0	0	0	0
regulation of lateral mesodermal cell fate specification	0	0	0	0	0	0
regulation of leukocyte migration	0	0	0	0	0	0
regulation of lipoprotein lipid oxidation	0	0	0	0	0	0
regulation of lymphocyte differentiation	0	0	0	0	0	0
regulation of mast cell differentiation	0	0	0	0	0	0
regulation of membrane potential	0	0	0	0	0	0
regulation of microtubule polymerization or depolymerization	0	0	0	0	0	0
regulation of mitotic cell cycle spindle assembly checkpoint	0	0	0	0	0	0
regulation of mitotic metaphase/anaphase transition	0	0	0	0	0	0
regulation of mitotic sister chromatid separation	0	0	0	0	0	0
regulation of mitotic spindle organization	0	0	0	0	0	0
regulation of monocyte differentiation	0	0	0	0	0	0
regulation of muscle filament sliding	0	0	0	0	0	0
regulation of myosin II filament organization	0	0	0	0	0	0
regulation of natural killer cell mediated cytotoxicity	0	0	0	0	0	0
regulation of nephron tubule epithelial cell differentiation	0	0	0	0	0	0
regulation of nerve growth factor receptor activity	0	0	0	0	0	0
regulation of neuron apoptotic process	0	0	0	0	0	0
regulation of neuron differentiation	0	0	0	0	0	0
regulation of neuron migration	0	0	0	0	0	0
regulation of neutrophil degranulation	0	0	0	0	0	0
regulation of odontogenesis of dentin-containing tooth	0	0	0	0	0	0
regulation of opioid receptor signaling pathway	0	0	0	0	0	0
regulation of osteoclast differentiation	0	0	0	0	0	0
regulation of peptidyl-cysteine S-nitrosylation	0	0	0	0	0	0
regulation of phagocytosis	0	0	0	0	0	0
regulation of phosphate transport	0	0	0	0	0	0
regulation of phosphatidylcholine catabolic process	0	0	0	0	0	0
regulation of phospholipase activity	0	0	0	0	0	0
regulation of phosphorylation	0	0	0	0	0	0
regulation of platelet activation	0	0	0	0	0	0
regulation of potassium ion transport	0	0	0	0	0	0
regulation of primitive erythrocyte differentiation	0	0	0	0	0	0
regulation of progesterone secretion	0	0	0	0	0	0
regulation of prostatic bud formation	0	0	0	0	0	0
regulation of proteasomal protein catabolic process	0	0	0	0	0	0
regulation of protein deacetylation	0	0	0	0	0	0
regulation of protein deubiquitination	0	0	0	0	0	0
regulation of protein folding in endoplasmic reticulum	0	0	0	0	0	0
regulation of protein kinase A signaling	0	0	0	0	0	0
regulation of protein kinase B signaling	0	0	0	0	0	0
regulation of protein secretion	0	0	0	0	0	0
regulation of protein stability	0	0	0	0	0	0
regulation of protein ubiquitination	0	0	0	0	0	0
regulation of proteinase activated receptor activity	0	0	0	0	0	0
regulation of relaxation of cardiac muscle	0	0	0	0	0	0
regulation of removal of superoxide radicals	0	0	0	0	0	0
regulation of renal sodium excretion	0	0	0	0	0	0
regulation of response to interferon-gamma	0	0	0	0	0	0
regulation of rhodopsin mediated signaling pathway	0	0	0	0	0	0
regulation of rubidium ion transport	0	0	0	0	0	0
regulation of sarcomere organization	0	0	0	0	0	0
regulation of sensory perception of pain	0	0	0	0	0	0
regulation of signal transduction by receptor internalization	0	0	0	0	0	0
regulation of skeletal muscle adaptation	0	0	0	0	0	0
regulation of skeletal muscle tissue development	0	0	0	0	0	0
regulation of smooth muscle contraction	0	0	0	0	0	0
regulation of sodium ion transport	0	0	0	0	0	0
regulation of somatostatin secretion	0	0	0	0	0	0
regulation of spindle assembly	0	0	0	0	0	0
regulation of steroid biosynthetic process	0	0	0	0	0	0
regulation of stress fiber assembly	0	0	0	0	0	0
regulation of striated muscle contraction	0	0	0	0	0	0
regulation of superoxide anion generation	0	0	0	0	0	0
regulation of synaptic transmission	0	0	0	0	0	0
regulation of systemic arterial blood pressure by vasopressin	0	0	0	0	0	0
regulation of the force of heart contraction by cardiac conduction	0	0	0	0	0	0
regulation of thyroid-stimulating hormone secretion	0	0	0	0	0	0
regulation of transforming growth factor beta receptor signaling pathway	0	0	0	0	0	0
regulation of translation	0	0	0	0	0	0
regulation of triglyceride biosynthetic process	0	0	0	0	0	0
regulation of tumor necrosis factor-mediated signaling pathway	0	0	0	0	0	0
regulation of type I interferon-mediated signaling pathway	0	0	0	0	0	0
regulation of vascular permeability involved in acute inflammatory response	0	0	0	0	0	0
regulation of vascular wound healing	0	0	0	0	0	0
regulation of vasoconstriction by circulating norepinephrine	0	0	0	0	0	0
regulation of vitamin D receptor signaling pathway	0	0	0	0	0	0
regulation of water loss via skin	0	0	0	0	0	0
removal of superoxide radicals	0	0	0	0	0	0
renal vesicle induction	0	0	0	0	0	0
renal water absorption	0	0	0	0	0	0
renal water homeostasis	0	0	0	0	0	0
renin secretion into blood stream	0	0	0	0	0	0
response to L-ascorbic acid	0	0	0	0	0	0
response to biotin	0	0	0	0	0	0
response to cobalamin	0	0	0	0	0	0
response to defense-related host nitric oxide production	0	0	0	0	0	0
response to estradiol	0	0	0	0	0	0
response to folic acid	0	0	0	0	0	0
response to fructose	0	0	0	0	0	0
response to genistein	0	0	0	0	0	0
response to glucagon	0	0	0	0	0	0
response to glucocorticoid	0	0	0	0	0	0
response to glucose	0	0	0	0	0	0
response to growth hormone	0	0	0	0	0	0
response to insulin	0	0	0	0	0	0
response to mineralocorticoid	0	0	0	0	0	0
response to morphine	0	0	0	0	0	0
response to norepinephrine	0	0	0	0	0	0
response to prostaglandin E	0	0	0	0	0	0
response to prostaglandin F	0	0	0	0	0	0
response to vitamin A	0	0	0	0	0	0
response to vitamin B1	0	0	0	0	0	0
response to vitamin B2	0	0	0	0	0	0
response to vitamin B3	0	0	0	0	0	0
response to vitamin E	0	0	0	0	0	0
response to vitamin K	0	0	0	0	0	0
retinal cell apoptotic process	0	0	0	0	0	0
retinol transport	0	0	0	0	0	0
rhodopsin mediated signaling pathway	0	0	0	0	0	0
riboflavin biosynthetic process	0	0	0	0	0	0
ribonucleoprotein complex import into nucleus	0	0	0	0	0	0
ribosomal small subunit assembly	0	0	0	0	0	0
ribosomal subunit export from nucleus	0	0	0	0	0	0
ribosome assembly	0	0	0	0	0	0
right ventricular cardiac muscle tissue morphogenesis	0	0	0	0	0	0
sarcomere organization	0	0	0	0	0	0
secondary heart field specification	0	0	0	0	0	0
secretion of lysosomal enzymes	0	0	0	0	0	0
secretory columnal luminar epithelial cell differentiation involved in prostate glandular acinus development	0	0	0	0	0	0
sensory perception of sound	0	0	0	0	0	0
sensory perception of touch	0	0	0	0	0	0
serotonin receptor signaling pathway	0	0	0	0	0	0
serotonin uptake	0	0	0	0	0	0
signal peptide processing	0	0	0	0	0	0
signal transduction involved in intra-S DNA damage checkpoint	0	0	0	0	0	0
skeletal muscle cell differentiation	0	0	0	0	0	0
smooth muscle hyperplasia	0	0	0	0	0	0
smooth muscle hypertrophy	0	0	0	0	0	0
smoothened signaling pathway involved in dorsal/ventral neural tube patterning	0	0	0	0	0	0
smoothened signaling pathway involved in regulation of cerebellar granule cell precursor cell proliferation	0	0	0	0	0	0
smoothened signaling pathway involved in spinal cord motor neuron cell fate specification	0	0	0	0	0	0
smoothened signaling pathway involved in ventral spinal cord interneuron specification	0	0	0	0	0	0
sodium ion transport	0	0	0	0	0	0
sodium-dependent organic cation transport	0	0	0	0	0	0
sodium-independent organic anion transport	0	0	0	0	0	0
somatic stem cell maintenance	0	0	0	0	0	0
sorbitol catabolic process	0	0	0	0	0	0
specification of anterior mesonephric tubule identity	0	0	0	0	0	0
specification of posterior mesonephric tubule identity	0	0	0	0	0	0
spliceosomal tri-snRNP complex assembly	0	0	0	0	0	0
squamous basal epithelial stem cell differentiation involved in prostate gland acinus development	0	0	0	0	0	0
steroid hormone receptor complex assembly	0	0	0	0	0	0
stress fiber assembly	0	0	0	0	0	0
stress granule assembly	0	0	0	0	0	0
stress-activated protein kinase signaling cascade	0	0	0	0	0	0
stress-induced mitochondrial fusion	0	0	0	0	0	0
synaptic transmission, GABAergic	0	0	0	0	0	0
synaptic vesicle fusion to presynaptic membrane	0	0	0	0	0	0
synaptic vesicle priming	0	0	0	0	0	0
telencephalon cell migration	0	0	0	0	0	0
telomere formation via telomerase	0	0	0	0	0	0
thermoception	0	0	0	0	0	0
thrombin receptor signaling pathway	0	0	0	0	0	0
transcription, DNA-templated	0	0	0	0	0	0
transformation of host cell by virus	0	0	0	0	0	0
transformed cell apoptotic process	0	0	0	0	0	0
transforming growth factor beta receptor complex assembly	0	0	0	0	0	0
translational frameshifting	0	0	0	0	0	0
translational termination	0	0	0	0	0	0
transmembrane receptor protein serine/threonine kinase signaling pathway	0	0	0	0	0	0
transmembrane receptor protein tyrosine kinase signaling pathway	0	0	0	0	0	0
trehalose biosynthetic process	0	0	0	0	0	0
triglyceride metabolic process	0	0	0	0	0	0
trophectodermal cellular morphogenesis	0	0	0	0	0	0
tubulin complex assembly	0	0	0	0	0	0
type B pancreatic cell apoptotic process	0	0	0	0	0	0
type B pancreatic cell development	0	0	0	0	0	0
ubiquinone biosynthetic process	0	0	0	0	0	0
urate transport	0	0	0	0	0	0
ureter smooth muscle cell differentiation	0	0	0	0	0	0
uridine transport	0	0	0	0	0	0
vasoconstriction	0	0	0	0	0	0
vasodilation	0	0	0	0	0	0
venous endothelial cell differentiation	0	0	0	0	0	0
ventral spinal cord interneuron differentiation	0	0	0	0	0	0
ventricular compact myocardium morphogenesis	0	0	0	0	0	0
very-low-density lipoprotein particle assembly	0	0	0	0	0	0
viral entry into host cell	0	0	0	0	0	0
viral transcription	0	0	0	0	0	0
visual perception	0	0	0	0	0	0
vitamin D catabolic process	0	0	0	0	0	0
vitamin E biosynthetic process	0	0	0	0	0	0
wound healing, spreading of epidermal cells	0	0	0	0	0	0
zygotic determination of anterior/posterior axis, embryo	0	0	0	0	0	0
