# Supplementary material for: Network stratification analysis for identifying function-specific network layers
Source: Royal Society of Chemistry journal article supplement (doi:10.1039/c5mb00782h), 2016-02-08
Supplement: c5mb00782h1.zip [file Supplementary_Table_S2.xlsx]

## Sheet: Sheet1
GO Terms	normal	new	one-months	four-months	SD	1/CV
formation of translation preinitiation complex	0.999937	0.999023	0	0	0.57705	0.866025
regulation of interferon-gamma-mediated signaling pathway	0.961341	0.999435	0	0	0.566241	0.865699
chromatin assembly	0.988411	0.972714	0	0	0.566164	0.86597
Notch signaling involved in heart development	0	0.941906	0	0.99961	0.560962	0.865261
extracellular negative regulation of signal transduction	0	0	0.954314	0.974174	0.556766	0.865934
Wnt signaling pathway involved in somitogenesis	0	0.895774	0.99785	0	0.548228	0.86352
positive regulation of helicase activity	0.99674	0.895774	0	0	0.547875	0.863571
isocitrate metabolic process	0.940558	0	0.954314	0	0.547031	0.86598
positive regulation of cytokinesis	0.892704	0	0.992231	0	0.545649	0.863621
nucleosome disassembly	0.96736	0.914062	0	0	0.543555	0.865331
leukocyte migration involved in inflammatory response	0	0.895774	0	0.974174	0.540756	0.864507
organ induction	0	0.878726	0.969434	0	0.534802	0.863947
positive regulation of epithelial cell proliferation involved in lung morphogenesis	0	0.895774	0.954314	0	0.534609	0.86516
regulation of branching involved in salivary gland morphogenesis by mesenchymal-epithelial signaling	0	0.895774	0.954314	0	0.534609	0.86516
eye photoreceptor cell development	0.940558	0.895774	0	0	0.530419	0.865511
gamma-aminobutyric acid signaling pathway	0.940558	0.895774	0	0	0.530419	0.865511
inflammatory cell apoptotic process	0.940558	0.895774	0	0	0.530419	0.865511
macrophage activation involved in immune response	0.940558	0.895774	0	0	0.530419	0.865511
regulation of membrane repolarization	0.940558	0.895774	0	0	0.530419	0.865511
regulation of telomere maintenance	0.977178	0.793951	0	0	0.516724	0.856903
positive regulation of mRNA catabolic process	0	0.991973	0	0.738979	0.510246	0.848097
regulation of gene expression by genetic imprinting	0.974222	0.736788	0	0	0.503348	0.849815
regulation of interleukin-12 biosynthetic process	0	1	0	0	0.5	0.5
signal transduction involved in cell cycle checkpoint	0	1	0	0	0.5	0.5
DNA strand elongation	0	1	0	0	0.5	0.5
regulation of G1/S transition of mitotic cell cycle	0	1	0	0	0.5	0.5
positive regulation of cell cycle arrest	0	1	0	0	0.5	0.5
COPI coating of Golgi vesicle	0.999993	0	0	0	0.499996	0.5
DNA damage response, signal transduction by p53 class mediator	0	0.999914	0	0	0.499957	0.5
triglyceride homeostasis	0	0	0.999808	0	0.499904	0.5
regulation of acyl-CoA biosynthetic process	0	0.917955	0	0.806542	0.499893	0.862433
regulation of mast cell degranulation	0	0.999131	0	0	0.499565	0.5
regulation of platelet activation	0.997943	0	0	0	0.498971	0.5
endothelial cell apoptotic process	0.99674	0	0	0	0.49837	0.5
positive regulation of interferon-beta production	0.990611	0.677074	0	0	0.498145	0.836947
positive regulation of blood coagulation	0	0	0	0.996224	0.498112	0.5
glycosphingolipid metabolic process	0	0.995306	0	0	0.497653	0.5
epithelial tube branching involved in lung morphogenesis	0	0	0.954314	0.738979	0.496654	0.852351
regulation of fatty acid biosynthetic process	0	0	0.992985	0	0.496493	0.5
smooth muscle cell migration	0	0.737569	0	0.952378	0.495665	0.852363
protein localization to chromosome, telomeric region	0.892704	0.818835	0	0	0.494998	0.864417
DNA replication initiation	1	0.999886	0.964842	0	0.494398	1.49916
regulation of calcium ion-dependent exocytosis	0.988411	0	0	0	0.494206	0.5
regulation of endothelial cell apoptotic process	0.988411	0	0	0	0.494206	0.5
attachment of spindle microtubules to kinetochore	0.940558	0	0	0.738979	0.491775	0.853814
positive regulation of odontogenesis	0.940558	0	0	0.738979	0.491775	0.853814
positive regulation of bone mineralization	0	0	0.982644	0	0.491322	0.5
regulation of epidermal growth factor receptor signaling pathway	0	0.97767	0	0	0.488835	0.5
telomere maintenance	0	0.975982	0	0	0.487991	0.5
negative regulation of growth of symbiont in host	0.974222	0	0	0	0.487111	0.5
2-oxoglutarate metabolic process	0	0	0	0.974174	0.487087	0.5
hydrogen peroxide catabolic process	0	0	0	0.974174	0.487087	0.5
monocyte differentiation	0	0	0	0.974174	0.487087	0.5
chaperone-mediated protein folding	0.897655	0.989546	0.987397	0	0.481009	1.49404
spliceosomal complex assembly	0.928344	0.96653	0	0.97705	0.479111	1.49857
gene silencing	0	0.956715	0	0	0.478357	0.5
regulation of smooth muscle cell migration	0	0.677074	0	0.936701	0.477762	0.844444
SMAD protein complex assembly	0.999852	0	0.485308	0	0.477424	0.777694
negative regulation of protein catabolic process	0.954079	0	0	0	0.47704	0.5
lipopolysaccharide-mediated signaling pathway	0	0.95296	0	0	0.47648	0.5
G-protein coupled glutamate receptor signaling pathway	0.940558	0	0.660554	0	0.476127	0.840696
autophagic vacuole fusion	0.940558	0	0.660554	0	0.476127	0.840696
myotube cell development	0.940558	0	0.660554	0	0.476127	0.840696
regulation of attachment of spindle microtubules to kinetochore	0.940558	0	0.660554	0	0.476127	0.840696
regulation of natural killer cell mediated cytotoxicity	0	0	0	0.951622	0.475811	0.5
succinate metabolic process	0	0	0	0.951622	0.475811	0.5
regulation of defense response to virus by virus	0	0.848496	0.796319	0	0.475295	0.865155
regulation of DNA damage response, signal transduction by p53 class mediator	0	0.943515	0	0	0.471758	0.5
G-protein coupled acetylcholine receptor signaling pathway	0.940558	0	0	0	0.470279	0.5
Golgi to plasma membrane transport	0.940558	0	0	0	0.470279	0.5
killing by host of symbiont cells	0.940558	0	0	0	0.470279	0.5
mRNA splice site selection	0.940558	0.895774	0	0.974174	0.469517	1.49649
regulation of mitotic metaphase/anaphase transition	0	0.937489	0	0	0.468744	0.5
regulation of glucose import in response to insulin stimulus	0	0.511523	0	0.974174	0.468632	0.792572
DNA deamination	0	0	0	0.924434	0.462217	0.5
protein refolding	0.979492	0	0.330919	0	0.461742	0.709493
purinergic nucleotide receptor signaling pathway	0	0.991973	0.954314	0.738979	0.461213	1.45555
growth plate cartilage development	0	0.511523	0.954314	0	0.460145	0.796399
regulation of DNA biosynthetic process	0	0.511523	0.954314	0	0.460145	0.796399
ventricular cardiac muscle tissue development	0	0.511523	0.954314	0	0.460145	0.796399
NLS-bearing protein import into nucleus	0.892704	0	0	0.668099	0.459801	0.84863
negative regulation of chondrocyte differentiation	0	0.895774	0.660554	0	0.459421	0.846896
tonic smooth muscle contraction	0	0.895774	0.660554	0	0.459421	0.846896
positive regulation of cytokine production involved in inflammatory response	0	0.511523	0.954314	0.974174	0.459337	1.32801
negative regulation of gene expression, epigenetic	0.404959	0.969821	0	0	0.458999	0.748793
immune response-inhibiting cell surface receptor signaling pathway	0.940558	0.991973	0	0.738979	0.458442	1.45684
actin filament bundle assembly	0	0.914062	0	0	0.457031	0.5
intrinsic apoptotic signaling pathway in response to endoplasmic reticulum stress	0.605391	0.914062	0	0	0.456371	0.832356
macroautophagy	0.940558	0.511523	0	0.974174	0.455939	1.33036
type I interferon biosynthetic process	0.940558	0.511523	0	0.974174	0.455939	1.33036
MAPK import into nucleus	0.940558	0.511523	0	0	0.454302	0.799073
cellular response to catecholamine stimulus	0.940558	0.511523	0	0	0.454302	0.799073
positive regulation of cytoplasmic mRNA processing body assembly	0.940558	0.511523	0	0	0.454302	0.799073
negative regulation of gastric acid secretion	0.617825	0.895774	0	0	0.451433	0.83822
positive regulation of insulin receptor signaling pathway	0.617825	0.895774	0	0	0.451433	0.83822
retrograde transport, vesicle recycling within Golgi	0.617825	0.895774	0	0	0.451433	0.83822
positive regulation of erythrocyte differentiation	0.940558	0.511523	0.954314	0	0.450679	1.33487
positive regulation of T cell cytokine production	0	0.900838	0	0	0.450419	0.5
maintenance of DNA repeat elements	0.99674	0.895774	0.660554	0	0.448217	1.42401
hair cell differentiation	0	0.895774	0	0	0.447887	0.5
sensory perception of smell	0	0.895774	0	0	0.447887	0.5
clathrin coat assembly	0	0.972714	0.916396	0.668099	0.446274	1.43253
spinal cord oligodendrocyte cell fate specification	0.617825	0.895774	0	0.974174	0.44192	1.40737
enucleate erythrocyte differentiation	0.892704	0.972714	0	0.668099	0.441502	1.4346
extrinsic apoptotic signaling pathway via death domain receptors	0.909141	0.0924576	0	0	0.441319	0.56739
negative regulation of mitosis	0	0.88113	0	0	0.440565	0.5
ciliary neurotrophic factor-mediated signaling pathway	0	0.167333	0.999898	0.446335	0.438221	0.920522
regulation of DNA methylation	0.940558	0.895774	0	0.738979	0.437833	1.47049
oncostatin-M-mediated signaling pathway	0.617825	0.895774	0.954314	0	0.436725	1.41274
muscle fiber development	0	0	0.872364	0	0.436182	0.5
positive regulation of cell morphogenesis involved in differentiation	0	0.866541	0	0	0.43327	0.5
nucleotide-excision repair, DNA incision	0.988411	0.818835	0	0.668099	0.432809	1.42981
viral protein processing	0.235799	0.914062	0	0	0.432267	0.665017
JAK-STAT cascade involved in growth hormone signaling pathway	0.932633	0.899817	0	0.615519	0.432127	1.41623
mitotic cell cycle checkpoint	0	0.856159	0	0	0.42808	0.5
regulation of actin cytoskeleton reorganization	0.381692	0.900838	0	0	0.426606	0.75159
dendritic cell migration	0	0.851568	0	0	0.425784	0.5
leukemia inhibitory factor signaling pathway	0.44816	0.736788	0.982445	0	0.422099	1.2837
positive regulation of interferon-alpha production	0.96736	0.737569	0	0.403518	0.420806	1.25262
signal complex assembly	0	0.677074	0.623103	0.998651	0.417468	1.37665
positive regulation of protein catabolic process	0	0.831569	0	0	0.415785	0.5
regulation of type I interferon-mediated signaling pathway	0	0.831569	0	0	0.415785	0.5
DNA recombinase assembly	0.325081	0.995306	0	0.493694	0.41526	1.09214
transmembrane receptor protein tyrosine phosphatase signaling pathway	0	0.818835	0.575274	0	0.414546	0.840744
regulation of T cell receptor signaling pathway	0	0.32716	0.501001	0.992403	0.414039	1.09927
regulation of fatty acid transport	0	0.818835	0.916396	0.668099	0.413372	1.45349
nitric oxide mediated signal transduction	0	0	0.824426	0.546076	0.411626	0.832371
regulation of systemic arterial blood pressure by renin-angiotensin	0	0	0.824426	0.546076	0.411626	0.832371
phosphatidic acid metabolic process	0	0.511523	0.954314	0.738979	0.409535	1.34593
phosphatidylglycerol acyl-chain remodeling	0	0.511523	0.954314	0.738979	0.409535	1.34593
synaptic vesicle exocytosis	0	0.818835	0	0	0.409417	0.5
interleukin-5-mediated signaling pathway	0.617825	0	0.660554	0.974174	0.407658	1.3814
histamine secretion	0.940558	0	0.660554	0.738979	0.407457	1.43579
hormone-mediated apoptotic signaling pathway	0.940558	0	0.660554	0.738979	0.407457	1.43579
positive regulation of antigen receptor-mediated signaling pathway	0	0.511523	0.660554	0.974174	0.406368	1.32039
regulation of germinal center formation	0	0	0.660554	0.738979	0.405277	0.863319
positive regulation of vascular permeability	0.940558	0.511523	0	0.738979	0.405055	1.35232
regulation of mRNA processing	0	0.7964	0	0	0.3982	0.5
Clara cell differentiation	0.617825	0.511523	0.954314	0	0.39525	1.31794
positive regulation of synaptic transmission, cholinergic	0.617825	0.511523	0.954314	0	0.39525	1.31794
post-chaperonin tubulin folding pathway	0.617825	0.511523	0.954314	0	0.39525	1.31794
myeloid dendritic cell differentiation	0	0.895774	0.660554	0.738979	0.394852	1.45327
semaphorin-plexin signaling pathway involved in bone trabecula morphogenesis	0	0.895774	0.660554	0.738979	0.394852	1.45327
negative regulation of apoptotic signaling pathway	0	0.789363	0	0	0.394682	0.5
DNA strand renaturation	0.940558	0.511523	0.660554	0	0.394474	1.33889
mesonephric tubule development	0.940558	0.511523	0.660554	0	0.394474	1.33889
microtubule anchoring at microtubule organizing center	0.617825	0.895774	0	0.738979	0.392293	1.43552
positive regulation of T cell tolerance induction	0.617825	0.895774	0	0.738979	0.392293	1.43552
positive regulation of catecholamine secretion	0.617825	0.895774	0	0.738979	0.392293	1.43552
regulation of protein kinase A signaling	0.617825	0.895774	0	0.738979	0.392293	1.43552
spliceosomal snRNP assembly	0.829612	0.321564	0	0	0.39173	0.734673
regulation of phosphatidylinositol 3-kinase signaling	0	0.783433	0	0	0.391716	0.5
positive regulation of synapse assembly	0.44816	0.941906	0.501001	0	0.385142	1.22751
cholesterol catabolic process	0.617825	0.895774	0.660554	0	0.382411	1.42134
dolichol metabolic process	0.617825	0.895774	0.660554	0	0.382411	1.42134
N-terminal protein amino acid modification	0.838358	0.736788	0	0.604015	0.375655	1.45024
cGMP-mediated signaling	0	0.511523	0	0.738979	0.372741	0.838721
interleukin-23-mediated signaling pathway	0	0.511523	0	0.738979	0.372741	0.838721
negative regulation of autophagy	0	0.511523	0	0.738979	0.372741	0.838721
positive regulation of cardioblast differentiation	0	0.511523	0	0.738979	0.372741	0.838721
positive regulation of dermatome development	0	0.511523	0	0.738979	0.372741	0.838721
positive regulation of saliva secretion	0	0.511523	0	0.738979	0.372741	0.838721
positive regulation of synaptic transmission, GABAergic	0	0.511523	0	0.738979	0.372741	0.838721
proteoglycan biosynthetic process	0	0.511523	0	0.738979	0.372741	0.838721
purine nucleobase metabolic process	0	0.511523	0	0.738979	0.372741	0.838721
regulation of RNA export from nucleus	0	0.511523	0	0.738979	0.372741	0.838721
sphingosine metabolic process	0	0.511523	0	0.738979	0.372741	0.838721
positive regulation of filopodium assembly	0	0.736788	0.501001	0	0.370058	0.836214
DNA demethylation	0	0	0	0.738979	0.36949	0.5
atrial cardiac muscle cell action potential	0	0	0	0.738979	0.36949	0.5
deoxyribonucleoside diphosphate metabolic process	0	0	0	0.738979	0.36949	0.5
kinetochore assembly	0	0	0	0.738979	0.36949	0.5
negative regulation of appetite	0	0	0	0.738979	0.36949	0.5
negative regulation of heart contraction	0	0	0	0.738979	0.36949	0.5
neuronal stem cell maintenance	0	0	0	0.738979	0.36949	0.5
positive regulation of establishment of protein localization to plasma membrane	0	0	0	0.738979	0.36949	0.5
positive regulation of heart rate	0	0	0	0.738979	0.36949	0.5
positive regulation of immune response to tumor cell	0	0	0	0.738979	0.36949	0.5
positive regulation of macrophage activation	0	0	0	0.738979	0.36949	0.5
positive regulation of monooxygenase activity	0	0	0	0.738979	0.36949	0.5
regulation of glutamate secretion	0	0	0	0.738979	0.36949	0.5
regulation of granulocyte differentiation	0	0	0	0.738979	0.36949	0.5
regulation of norepinephrine secretion	0	0	0	0.738979	0.36949	0.5
regulation of sensory perception of pain	0	0	0	0.738979	0.36949	0.5
regulation of smooth muscle cell-matrix adhesion	0	0	0	0.738979	0.36949	0.5
myosin filament assembly	0.617825	0	0.660554	0	0.369448	0.86506
negative regulation of transmission of nerve impulse	0.617825	0	0.660554	0	0.369448	0.86506
sarcomerogenesis	0.617825	0	0.660554	0	0.369448	0.86506
sulfate transport	0.617825	0	0.660554	0	0.369448	0.86506
regulation of DNA recombination	0	0.737569	0	0	0.368785	0.5
negative regulation of cytokine biosynthetic process	0	0.736788	0	0	0.368394	0.5
positive regulation of mitosis	0	0.736788	0	0	0.368394	0.5
macrophage differentiation	0	0	0.723419	0	0.36171	0.5
regulation of activin receptor signaling pathway	0	0	0.723419	0	0.36171	0.5
sarcomere organization	0	0	0.723419	0	0.36171	0.5
copper ion transport	0	0	0.575274	0.668099	0.360926	0.861239
peptide cross-linking	0	0	0.69557	0	0.347785	0.5
Wnt signaling pathway involved in dorsal/ventral axis specification	0	0.511523	0.660554	0	0.343776	0.852355
apoptotic process involved in morphogenesis	0	0.511523	0.660554	0	0.343776	0.852355
intermediate filament bundle assembly	0	0.511523	0.660554	0	0.343776	0.852355
keratan sulfate catabolic process	0	0.511523	0.660554	0	0.343776	0.852355
mature dendritic cell differentiation	0	0.511523	0.660554	0	0.343776	0.852355
positive regulation of ERBB signaling pathway	0	0.511523	0.660554	0	0.343776	0.852355
positive regulation of NAD(P)H oxidase activity	0	0.511523	0.660554	0	0.343776	0.852355
positive regulation of receptor biosynthetic process	0	0.511523	0.660554	0	0.343776	0.852355
prostatic bud formation	0	0.511523	0.660554	0	0.343776	0.852355
protein import into peroxisome matrix, docking	0	0.511523	0.660554	0	0.343776	0.852355
somatic stem cell maintenance	0	0.511523	0.660554	0	0.343776	0.852355
sphingomyelin metabolic process	0	0.511523	0.660554	0	0.343776	0.852355
tubulin complex assembly	0	0.511523	0.660554	0	0.343776	0.852355
Bergmann glial cell differentiation	0.617825	0	0.660554	0.738979	0.339949	1.48357
L-ascorbic acid metabolic process	0.617825	0	0.660554	0.738979	0.339949	1.48357
granulocyte differentiation	0.617825	0	0.660554	0.738979	0.339949	1.48357
negative regulation of collagen biosynthetic process	0.617825	0	0.660554	0.738979	0.339949	1.48357
regulation of B cell receptor signaling pathway	0.617825	0	0.660554	0.738979	0.339949	1.48357
interleukin-1-mediated signaling pathway	0	0.321366	0	0.714787	0.339506	0.762985
protein deacetylation	0	0.499509	0.655007	0	0.339272	0.85073
behavioral response to nicotine	0	0	0	0.668099	0.334049	0.5
ceramide metabolic process	0	0	0	0.668099	0.334049	0.5
nuclear pore complex assembly	0	0	0	0.668099	0.334049	0.5
positive regulation of glucose import	0.413183	0.803465	0.512841	0	0.332415	1.3007
STAT protein import into nucleus	0	0.511523	0.660554	0.738979	0.332187	1.43824
convergent extension involved in neural plate elongation	0	0.511523	0.660554	0.738979	0.332187	1.43824
interleukin-3-mediated signaling pathway	0	0.511523	0.660554	0.738979	0.332187	1.43824
keratan sulfate biosynthetic process	0	0.511523	0.660554	0.738979	0.332187	1.43824
lens induction in camera-type eye	0	0.511523	0.660554	0.738979	0.332187	1.43824
negative regulation of heterotypic cell-cell adhesion	0	0.511523	0.660554	0.738979	0.332187	1.43824
negative regulation of hydrogen peroxide-mediated programmed cell death	0	0.511523	0.660554	0.738979	0.332187	1.43824
opioid receptor signaling pathway	0	0.511523	0.660554	0.738979	0.332187	1.43824
phospholipid homeostasis	0	0.511523	0.660554	0.738979	0.332187	1.43824
positive regulation of deacetylase activity	0	0.511523	0.660554	0.738979	0.332187	1.43824
positive regulation of lipopolysaccharide-mediated signaling pathway	0	0.511523	0.660554	0.738979	0.332187	1.43824
positive regulation of myeloid leukocyte cytokine production involved in immune response	0	0.511523	0.660554	0.738979	0.332187	1.43824
pro-B cell differentiation	0	0.511523	0.660554	0.738979	0.332187	1.43824
regulation of interleukin-6 biosynthetic process	0	0.511523	0.660554	0.738979	0.332187	1.43824
viral budding	0	0.511523	0.660554	0.738979	0.332187	1.43824
cardiac muscle hypertrophy	0	0	0.660554	0	0.330277	0.5
cellular response to cholesterol	0	0	0.660554	0	0.330277	0.5
neural crest cell differentiation	0	0	0.660554	0	0.330277	0.5
peripheral nervous system myelin maintenance	0	0	0.660554	0	0.330277	0.5
positive regulation of cytokine-mediated signaling pathway	0	0	0.660554	0	0.330277	0.5
positive regulation of striated muscle cell differentiation	0	0	0.660554	0	0.330277	0.5
positive regulation of vasculogenesis	0	0	0.660554	0	0.330277	0.5
regulation of myeloid cell apoptotic process	0	0	0.660554	0	0.330277	0.5
response to vitamin D	0	0	0.660554	0	0.330277	0.5
viral entry into host cell	0	0	0.660554	0	0.330277	0.5
C21-steroid hormone biosynthetic process	0.617825	0.511523	0	0	0.328891	0.858453
apoptotic process involved in luteolysis	0.617825	0.511523	0	0	0.328891	0.858453
maintenance of protein location in nucleus	0.617825	0.511523	0	0	0.328891	0.858453
negative regulation of cell cycle arrest	0.617825	0.511523	0	0	0.328891	0.858453
negative regulation of negative chemotaxis	0.617825	0.511523	0	0	0.328891	0.858453
positive regulation of endoplasmic reticulum unfolded protein response	0.617825	0.511523	0	0	0.328891	0.858453
positive regulation of megakaryocyte differentiation	0.617825	0.511523	0	0	0.328891	0.858453
positive regulation of toll-like receptor signaling pathway	0.617825	0.511523	0	0	0.328891	0.858453
protein prenylation	0.617825	0.511523	0	0	0.328891	0.858453
regulation of dopamine metabolic process	0.617825	0.511523	0	0	0.328891	0.858453
ribosomal protein import into nucleus	0.617825	0.511523	0	0	0.328891	0.858453
cellular response to estrogen stimulus	0	0.409086	0	0.668099	0.328444	0.819916
caveola assembly	0.617825	0.511523	0	0.738979	0.324958	1.43736
cilium morphogenesis	0.617825	0.511523	0	0.738979	0.324958	1.43736
cortisol biosynthetic process	0.617825	0.511523	0	0.738979	0.324958	1.43736
heme catabolic process	0.617825	0.511523	0	0.738979	0.324958	1.43736
interferon-gamma biosynthetic process	0.617825	0.511523	0	0.738979	0.324958	1.43736
mineralocorticoid biosynthetic process	0.617825	0.511523	0	0.738979	0.324958	1.43736
negative regulation of protein oligomerization	0.617825	0.511523	0	0.738979	0.324958	1.43736
protein import into peroxisome matrix, translocation	0.617825	0.511523	0	0.738979	0.324958	1.43736
regulation of chromatin assembly or disassembly	0.617825	0.511523	0	0.738979	0.324958	1.43736
ISG15-protein conjugation	0.617825	0	0	0	0.308913	0.5
cellular response to caffeine	0.617825	0	0	0	0.308913	0.5
fusion of sperm to egg plasma membrane	0.617825	0	0	0	0.308913	0.5
glial cell apoptotic process	0.617825	0	0	0	0.308913	0.5
maintenance of gastrointestinal epithelium	0.617825	0	0	0	0.308913	0.5
peptidyl-proline modification	0.617825	0	0	0	0.308913	0.5
regulation of circadian sleep/wake cycle, sleep	0.617825	0	0	0	0.308913	0.5
regulation of glomerular filtration	0.617825	0	0	0	0.308913	0.5
synaptic transmission, dopaminergic	0.617825	0	0	0	0.308913	0.5
extrinsic apoptotic signaling pathway in absence of ligand	0.44816	0.736788	0.501001	0	0.307734	1.36965
RNA polymerase II transcriptional preinitiation complex assembly	0.617825	0.511523	0.660554	0	0.304827	1.46797
dosage compensation	0.617825	0.511523	0.660554	0	0.304827	1.46797
hyaluronan catabolic process	0.617825	0.511523	0.660554	0	0.304827	1.46797
low-density lipoprotein particle receptor biosynthetic process	0.617825	0.511523	0.660554	0	0.304827	1.46797
mitochondrial protein catabolic process	0.617825	0.511523	0.660554	0	0.304827	1.46797
mitotic cell cycle arrest	0.617825	0.511523	0.660554	0	0.304827	1.46797
negative regulation of establishment of protein localization to plasma membrane	0.617825	0.511523	0.660554	0	0.304827	1.46797
negative regulation of keratinocyte proliferation	0.617825	0.511523	0.660554	0	0.304827	1.46797
negative regulation of receptor biosynthetic process	0.617825	0.511523	0.660554	0	0.304827	1.46797
positive regulation of gastrulation	0.617825	0.511523	0.660554	0	0.304827	1.46797
positive regulation of platelet-derived growth factor receptor signaling pathway	0.617825	0.511523	0.660554	0	0.304827	1.46797
regulation of fibroblast migration	0.617825	0.511523	0.660554	0	0.304827	1.46797
regulation of keratinocyte differentiation	0.617825	0.511523	0.660554	0	0.304827	1.46797
vesicle fusion with Golgi apparatus	0.617825	0.511523	0.660554	0	0.304827	1.46797
regulation of mitochondrial outer membrane permeabilization involved in apoptotic signaling pathway	0.603941	0	0	0	0.30197	0.5
protein methylation	0	0.584895	0	0	0.292447	0.5
intrinsic apoptotic signaling pathway in response to oxidative stress	0	0.409086	0.575274	0	0.292147	0.842349
positive regulation of cell-matrix adhesion	0	0.409086	0.575274	0	0.292147	0.842349
substrate adhesion-dependent cell spreading	0	0	0.575274	0	0.287637	0.5
positive regulation of pseudopodium assembly	0.526199	0.409086	0	0	0.274194	0.852758
branching involved in mammary gland duct morphogenesis	0	0	0.529036	0	0.264518	0.5
negative regulation of striated muscle cell differentiation	0.526199	0.409086	0.575274	0	0.261234	1.4456
DNA ligation	0	0.511523	0	0	0.255762	0.5
cellular response to glucose starvation	0	0.511523	0	0	0.255762	0.5
cellular response to prostaglandin stimulus	0	0.511523	0	0	0.255762	0.5
defense response to Gram-negative bacterium	0	0.511523	0	0	0.255762	0.5
establishment of spindle orientation	0	0.511523	0	0	0.255762	0.5
glomerular visceral epithelial cell development	0	0.511523	0	0	0.255762	0.5
inner ear receptor cell differentiation	0	0.511523	0	0	0.255762	0.5
negative regulation of bone mineralization	0	0.511523	0	0	0.255762	0.5
negative regulation of erythrocyte differentiation	0	0.511523	0	0	0.255762	0.5
neural crest cell development	0	0.511523	0	0	0.255762	0.5
positive regulation of autophagy	0	0.511523	0	0	0.255762	0.5
positive regulation of circadian sleep/wake cycle, wakefulness	0	0.511523	0	0	0.255762	0.5
positive regulation of collagen biosynthetic process	0	0.511523	0	0	0.255762	0.5
protein retention in ER lumen	0	0.511523	0	0	0.255762	0.5
regulation of dopamine secretion	0	0.511523	0	0	0.255762	0.5
regulation of execution phase of apoptosis	0	0.511523	0	0	0.255762	0.5
regulation of receptor internalization	0	0.511523	0	0	0.255762	0.5
telencephalon cell migration	0	0.511523	0	0	0.255762	0.5
positive regulation of vascular endothelial growth factor receptor signaling pathway	0	0.502587	0.330919	0	0.250611	0.831473
organelle transport along microtubule	0	0.500737	0	0	0.250368	0.5
regulation of glycolytic process	0	0	0	0.493694	0.246847	0.5
prolactin signaling pathway	0.617825	0.511523	0.954314	0.999118	0.242509	3.178
positive regulation of intracellular steroid hormone receptor signaling pathway	0.892704	0.409086	0.916396	0.668099	0.236467	3.05147
regulation of protein deacetylation	0	0.557475	0.190344	0.298169	0.232659	1.12395
protein dephosphorylation	0	0.462052	0	0	0.231026	0.5
cellular process regulating host cell cycle in response to virus	0.940558	0.511523	0.660554	0.974174	0.223274	3.4563
negative regulation of macrophage cytokine production	0.99674	0.511523	0.954314	0.738979	0.223205	3.58589
oxaloacetate metabolic process	0	0	0.436316	0	0.218158	0.5
preassembly of GPI anchor in ER membrane	0	0.43545	0	0	0.217725	0.5
attachment of GPI anchor to protein	0.999517	0.972714	0.575274	0.668099	0.214069	3.75534
Mo-molybdopterin cofactor biosynthetic process	0.940558	0.511523	0.954314	0.738979	0.207979	3.78088
muscle cell apoptotic process	0	0.409086	0	0	0.204543	0.5
response to prostaglandin E	0	0.409086	0	0	0.204543	0.5
regulation of epithelial to mesenchymal transition	0	0	0	0.388393	0.194196	0.5
DNA methylation	0.381692	0.26164	0	0	0.192072	0.837357
Type II pneumocyte differentiation	0.617825	0.511523	0.954314	0.738979	0.190038	3.71327
platelet activating factor metabolic process	0.617825	0.511523	0.954314	0.738979	0.190038	3.71327
positive regulation of mast cell activation	0	0	0.379981	0	0.189991	0.5
interleukin-2-mediated signaling pathway	0.999517	0.818835	0.575274	0.668099	0.185546	4.1253
regulation of glucose metabolic process	0	0.368348	0	0	0.184174	0.5
pyrimidine nucleobase metabolic process	0	0.20924	0.379981	0	0.183822	0.801347
tachykinin receptor signaling pathway	0	0	0	0.364808	0.182404	0.5
intrinsic apoptotic signaling pathway by p53 class mediator	0	0.358829	0	0	0.179414	0.5
acetyl-CoA biosynthetic process	0.940558	0.511523	0.660554	0.738979	0.1787	3.98939
erythropoietin-mediated signaling pathway	0.940558	0.511523	0.660554	0.738979	0.1787	3.98939
negative regulation of Notch signaling pathway	0.940558	0.511523	0.660554	0.738979	0.1787	3.98939
regulation of systemic arterial blood pressure by endothelin	0.940558	0.511523	0.660554	0.738979	0.1787	3.98939
androgen receptor signaling pathway	0	0.350372	0	0	0.175186	0.5
citrate metabolic process	0.617825	0.895774	0.660554	0.974174	0.174618	4.50744
maternal behavior	0.617825	0.991973	0.660554	0.738979	0.167453	4.4928
myotube differentiation	0	0	0.330919	0	0.165459	0.5
regulation of fatty acid oxidation	0	0	0.330919	0	0.165459	0.5
T cell homeostasis	0	0.32716	0	0	0.16358	0.5
regulation of follicle-stimulating hormone secretion	0	0.32716	0	0	0.16358	0.5
regulation of glycoprotein biosynthetic process	0	0.32716	0	0	0.16358	0.5
axon cargo transport	0.325082	0	0	0	0.162541	0.5
auditory receptor cell fate commitment	0.617825	0.895774	0.954314	0.738979	0.152627	5.25284
targeting of mRNA for destruction involved in RNA interference	0.617825	0.895774	0.954314	0.738979	0.152627	5.25284
positive regulation of stress-activated protein kinase signaling cascade	0	0.295463	0	0	0.147731	0.5
ventricular trabecula myocardium morphogenesis	0.940558	0.895774	0.660554	0.974174	0.141824	6.11859
regulation of androgen receptor signaling pathway	0	0.26164	0	0	0.13082	0.5
negative regulation of cell fate specification	0.617825	0.895774	0.660554	0.738979	0.122414	5.94933
progesterone receptor signaling pathway	0.617825	0.895774	0.660554	0.738979	0.122414	5.94933
regulation of cardiac cell fate specification	0.617825	0.895774	0.660554	0.738979	0.122414	5.94933
regulation of the force of heart contraction by chemical signal	0.617825	0.895774	0.660554	0.738979	0.122414	5.94933
replication fork processing	0.617825	0.895774	0.660554	0.738979	0.122414	5.94933
mitotic nuclear envelope reassembly	0.838358	0.736788	0.872364	0.604015	0.120558	6.32793
negative regulation of endothelial cell proliferation	0.44816	0.32716	0.501001	0.604015	0.115183	4.0812
SMAD protein import into nucleus	0.99674	0.895774	0.954314	0.738979	0.112848	7.94391
patterning of blood vessels	0	0	0	0.220318	0.110159	0.5
negative regulation of myeloid leukocyte differentiation	0	0.20924	0	0	0.10462	0.5
regulated secretory pathway	0	0.20924	0	0	0.10462	0.5
regulation of histone modification	0	0.203323	0	0	0.101662	0.5
cargo loading into vesicle	0.940558	0.895774	0.954314	0.738979	0.0988302	8.92851
negative regulation of dendritic cell differentiation	0.940558	0.895774	0.954314	0.738979	0.0988302	8.92851
protein localization to chromatin	0.940558	0.895774	0.954314	0.738979	0.0988302	8.92851
DNA replication, synthesis of RNA primer	0.617825	0.511523	0.660554	0.738979	0.094825	6.66724
N-methyl-D-aspartate receptor clustering	0.617825	0.511523	0.660554	0.738979	0.094825	6.66724
Wnt signaling pathway involved in forebrain neuroblast division	0.617825	0.511523	0.660554	0.738979	0.094825	6.66724
acetylcholine catabolic process in synaptic cleft	0.617825	0.511523	0.660554	0.738979	0.094825	6.66724
alpha-amino-3-hydroxy-5-methyl-4-isoxazole propionate selective glutamate receptor clustering	0.617825	0.511523	0.660554	0.738979	0.094825	6.66724
branch elongation involved in salivary gland morphogenesis	0.617825	0.511523	0.660554	0.738979	0.094825	6.66724
glucocorticoid receptor signaling pathway	0.617825	0.511523	0.660554	0.738979	0.094825	6.66724
interleukin-6 biosynthetic process	0.617825	0.511523	0.660554	0.738979	0.094825	6.66724
interleukin-7-mediated signaling pathway	0.617825	0.511523	0.660554	0.738979	0.094825	6.66724
intestinal cholesterol absorption	0.617825	0.511523	0.660554	0.738979	0.094825	6.66724
mesenchymal cell differentiation involved in lung development	0.617825	0.511523	0.660554	0.738979	0.094825	6.66724
negative regulation of mucus secretion	0.617825	0.511523	0.660554	0.738979	0.094825	6.66724
positive regulation of chemokine (C-X-C motif) ligand 2 production	0.617825	0.511523	0.660554	0.738979	0.094825	6.66724
positive regulation of mesenchymal stem cell differentiation	0.617825	0.511523	0.660554	0.738979	0.094825	6.66724
positive regulation of necroptotic process	0.617825	0.511523	0.660554	0.738979	0.094825	6.66724
positive regulation of receptor activity	0.617825	0.511523	0.660554	0.738979	0.094825	6.66724
positive regulation of retinoic acid receptor signaling pathway	0.617825	0.511523	0.660554	0.738979	0.094825	6.66724
positive regulation of synapse maturation	0.617825	0.511523	0.660554	0.738979	0.094825	6.66724
positive regulation of synaptic plasticity	0.617825	0.511523	0.660554	0.738979	0.094825	6.66724
regulation of centromeric sister chromatid cohesion	0.617825	0.511523	0.660554	0.738979	0.094825	6.66724
regulation of definitive erythrocyte differentiation	0.617825	0.511523	0.660554	0.738979	0.094825	6.66724
regulation of female receptivity	0.617825	0.511523	0.660554	0.738979	0.094825	6.66724
zinc ion transport	0.617825	0.511523	0.660554	0.738979	0.094825	6.66724
non-canonical Wnt signaling pathway	0	0.0684388	0.190344	0	0.0897639	0.720733
response to glucagon	0.149883	0	0	0	0.0749414	0.5
interleukin-4-mediated signaling pathway	0.838358	0.941906	0.872364	0.999992	0.0721706	12.6527
interleukin-6-mediated signaling pathway	0.721359	0.851568	0.774326	0.86037	0.0661636	12.12
protein targeting to peroxisome	0.0899798	0.0349995	0	0	0.0424907	0.735334
protein lipidation	0	0	0.0830264	0	0.0415132	0.5
detection of triacyl bacterial lipopeptide	0.940558	0.895774	0.954314	0.974174	0.0332825	28.2793
neutrophil aggregation	0.940558	0.895774	0.954314	0.974174	0.0332825	28.2793
cellular response to bacterial lipopeptide	0.940558	0.991973	0.954314	0.999118	0.0284883	34.1014
detection of diacyl bacterial lipopeptide	0.940558	0.991973	0.954314	0.999118	0.0284883	34.1014
5-phosphoribose 1-diphosphate biosynthetic process	0	0	0	0	0	0
B cell differentiation	0	0	0	0	0	0
B cell homeostasis	0	0	0	0	0	0
B cell proliferation	0	0	0	0	0	0
B cell receptor transport into membrane raft	0	0	0	0	0	0
CD8-positive, alpha-beta T cell lineage commitment	0	0	0	0	0	0
DNA biosynthetic process	0	0	0	0	0	0
DNA catabolic process	0	0	0	0	0	0
DNA conformation change	0	0	0	0	0	0
DNA dealkylation involved in DNA repair	0	0	0	0	0	0
DNA integration	0	0	0	0	0	0
DNA protection	0	0	0	0	0	0
DNA recombination	0	0	0	0	0	0
DNA repair	0	0	0	0	0	0
DNA replication	0	0	0	0	0	0
DNA-templated transcription, elongation	0	0	0	0	0	0
DNA-templated transcription, initiation	0	0	0	0	0	0
DNA-templated transcription, termination	0	0	0	0	0	0
FasL biosynthetic process	0	0	0	0	0	0
Fc receptor signaling pathway	0	0	0	0	0	0
G-protein coupled receptor internalization	0	0	0	0	0	0
G-protein coupled receptor signaling pathway, coupled to cyclic nucleotide second messenger	0	0	0	0	0	0
G2 DNA damage checkpoint	0	0	0	0	0	0
Golgi to endosome transport	0	0	0	0	0	0
Golgi vesicle budding	0	0	0	0	0	0
Golgi vesicle fusion to target membrane	0	0	0	0	0	0
Golgi vesicle prefusion complex stabilization	0	0	0	0	0	0
L-xylitol metabolic process	0	0	0	0	0	0
MAPK cascade	0	0	0	0	0	0
N-acetylglucosamine biosynthetic process	0	0	0	0	0	0
N-acetylneuraminate metabolic process	0	0	0	0	0	0
NFAT protein import into nucleus	0	0	0	0	0	0
RNA catabolic process	0	0	0	0	0	0
RNA export from nucleus	0	0	0	0	0	0
RNA import into nucleus	0	0	0	0	0	0
RNA modification	0	0	0	0	0	0
RNA processing	0	0	0	0	0	0
RNA secondary structure unwinding	0	0	0	0	0	0
Ras protein signal transduction	0	0	0	0	0	0
SCF complex assembly	0	0	0	0	0	0
SNARE complex disassembly	0	0	0	0	0	0
SRP-dependent cotranslational protein targeting to membrane, signal sequence recognition	0	0	0	0	0	0
SRP-dependent cotranslational protein targeting to membrane, translocation	0	0	0	0	0	0
T cell activation involved in immune response	0	0	0	0	0	0
T cell aggregation	0	0	0	0	0	0
T cell differentiation	0	0	0	0	0	0
T cell proliferation	0	0	0	0	0	0
T-helper 2 cell cytokine production	0	0	0	0	0	0
Type I pneumocyte differentiation	0	0	0	0	0	0
Wnt signaling pathway involved in wound healing, spreading of epidermal cells	0	0	0	0	0	0
Wnt-activated signaling pathway involved in forebrain neuron fate commitment	0	0	0	0	0	0
actin filament depolymerization	0	0	0	0	0	0
actin filament reorganization involved in cell cycle	0	0	0	0	0	0
actin modification	0	0	0	0	0	0
actomyosin contractile ring assembly	0	0	0	0	0	0
adenosine receptor signaling pathway	0	0	0	0	0	0
adiponectin-activated signaling pathway	0	0	0	0	0	0
adrenergic receptor signaling pathway involved in heart process	0	0	0	0	0	0
alpha-beta T cell activation	0	0	0	0	0	0
alpha-ketoglutarate transport	0	0	0	0	0	0
amino acid transport	0	0	0	0	0	0
ammonium transport	0	0	0	0	0	0
androgen biosynthetic process	0	0	0	0	0	0
angiotensin catabolic process in blood	0	0	0	0	0	0
angiotensin-activated signaling pathway	0	0	0	0	0	0
anterior compartment pattern formation	0	0	0	0	0	0
antibacterial peptide secretion	0	0	0	0	0	0
antigen processing and presentation of endogenous peptide antigen via MHC class I via ER pathway, TAP-dependent	0	0	0	0	0	0
antigen processing and presentation of endogenous peptide antigen via MHC class Ib via ER pathway, TAP-dependent	0	0	0	0	0	0
astral microtubule organization	0	0	0	0	0	0
astrocyte cell migration	0	0	0	0	0	0
auditory receptor cell development	0	0	0	0	0	0
autophagy in response to ER overload	0	0	0	0	0	0
axon extension involved in axon guidance	0	0	0	0	0	0
base-excision repair, gap-filling	0	0	0	0	0	0
behavioral response to cocaine	0	0	0	0	0	0
beta-amyloid formation	0	0	0	0	0	0
bicarbonate transport	0	0	0	0	0	0
blood vessel lumenization	0	0	0	0	0	0
blue light signaling pathway	0	0	0	0	0	0
box C/D snoRNP assembly	0	0	0	0	0	0
bradykinin catabolic process	0	0	0	0	0	0
branch elongation involved in mammary gland duct branching	0	0	0	0	0	0
branch elongation involved in ureteric bud branching	0	0	0	0	0	0
branching involved in ureteric bud morphogenesis	0	0	0	0	0	0
branchiomeric skeletal muscle development	0	0	0	0	0	0
branchiomotor neuron axon guidance	0	0	0	0	0	0
bud elongation involved in lung branching	0	0	0	0	0	0
bud outgrowth involved in lung branching	0	0	0	0	0	0
cAMP-mediated signaling	0	0	0	0	0	0
calcitonin catabolic process	0	0	0	0	0	0
calcium ion export	0	0	0	0	0	0
calcium ion transport	0	0	0	0	0	0
calcium ion-dependent exocytosis	0	0	0	0	0	0
calcium-mediated signaling	0	0	0	0	0	0
canonical Wnt signaling pathway	0	0	0	0	0	0
carboxylic acid catabolic process	0	0	0	0	0	0
cardiac muscle cell development	0	0	0	0	0	0
cardiac muscle cell differentiation	0	0	0	0	0	0
cardiac muscle contraction	0	0	0	0	0	0
cardiac vascular smooth muscle cell development	0	0	0	0	0	0
catecholamine biosynthetic process	0	0	0	0	0	0
catenin import into nucleus	0	0	0	0	0	0
cell migration involved in coronary angiogenesis	0	0	0	0	0	0
cell migration involved in coronary vasculogenesis	0	0	0	0	0	0
cell migration involved in endocardial cushion formation	0	0	0	0	0	0
cell migration involved in gastrulation	0	0	0	0	0	0
cell morphogenesis involved in neuron differentiation	0	0	0	0	0	0
cellular amino acid metabolic process	0	0	0	0	0	0
cellular extravasation	0	0	0	0	0	0
cellular glucose homeostasis	0	0	0	0	0	0
cellular polysaccharide biosynthetic process	0	0	0	0	0	0
cellular response to ATP	0	0	0	0	0	0
cellular response to UV-A	0	0	0	0	0	0
cellular response to UV-B	0	0	0	0	0	0
cellular response to UV-C	0	0	0	0	0	0
cellular response to cAMP	0	0	0	0	0	0
cellular response to cocaine	0	0	0	0	0	0
cellular response to copper ion starvation	0	0	0	0	0	0
cellular response to corticosteroid stimulus	0	0	0	0	0	0
cellular response to exogenous dsRNA	0	0	0	0	0	0
cellular response to follicle-stimulating hormone stimulus	0	0	0	0	0	0
cellular response to iron ion starvation	0	0	0	0	0	0
cellular response to iron(III) ion	0	0	0	0	0	0
cellular response to isoquinoline alkaloid	0	0	0	0	0	0
cellular response to leucine	0	0	0	0	0	0
cellular response to nicotine	0	0	0	0	0	0
cellular response to peptide hormone stimulus	0	0	0	0	0	0
cellular response to potassium ion starvation	0	0	0	0	0	0
cellular response to progesterone stimulus	0	0	0	0	0	0
cellular response to sucrose stimulus	0	0	0	0	0	0
central nervous system myelin maintenance	0	0	0	0	0	0
centrosome-templated microtubule nucleation	0	0	0	0	0	0
cerebellar Purkinje cell differentiation	0	0	0	0	0	0
cerebellar granule cell differentiation	0	0	0	0	0	0
cerebral cortex neuron differentiation	0	0	0	0	0	0
chaperone-mediated protein complex assembly	0	0	0	0	0	0
chemokine biosynthetic process	0	0	0	0	0	0
chemokine receptor transport out of membrane raft	0	0	0	0	0	0
chemokine-mediated signaling pathway	0	0	0	0	0	0
chitin catabolic process	0	0	0	0	0	0
chloride transport	0	0	0	0	0	0
cholesterol biosynthetic process	0	0	0	0	0	0
cholesterol efflux	0	0	0	0	0	0
cholesterol esterification	0	0	0	0	0	0
cholesterol homeostasis	0	0	0	0	0	0
cholesterol import	0	0	0	0	0	0
choline metabolic process	0	0	0	0	0	0
chondroitin sulfate biosynthetic process	0	0	0	0	0	0
chondroitin sulfate catabolic process	0	0	0	0	0	0
chromatin remodeling	0	0	0	0	0	0
ciliary receptor clustering involved in smoothened signaling pathway	0	0	0	0	0	0
cis assembly of pre-catalytic spliceosome	0	0	0	0	0	0
co-translational protein modification	0	0	0	0	0	0
commitment of neuronal cell to specific neuron type in forebrain	0	0	0	0	0	0
complement activation	0	0	0	0	0	0
connective tissue growth factor biosynthetic process	0	0	0	0	0	0
convergent extension involved in somitogenesis	0	0	0	0	0	0
coreceptor-mediated virion attachment to host cell	0	0	0	0	0	0
cortical microtubule organization	0	0	0	0	0	0
cristae formation	0	0	0	0	0	0
cytochrome complex assembly	0	0	0	0	0	0
cytokine secretion	0	0	0	0	0	0
cytoplasmic mRNA processing body assembly	0	0	0	0	0	0
de novo' protein folding	0	0	0	0	0	0
deadenylation-independent decapping of nuclear-transcribed mRNA	0	0	0	0	0	0
defense response to Gram-positive bacterium	0	0	0	0	0	0
defense response to fungus, incompatible interaction	0	0	0	0	0	0
definitive erythrocyte differentiation	0	0	0	0	0	0
detection of hypoxic conditions in blood by carotid body chemoreceptor signaling	0	0	0	0	0	0
detection of light stimulus involved in visual perception	0	0	0	0	0	0
detection of muramyl dipeptide	0	0	0	0	0	0
determination of affect	0	0	0	0	0	0
determination of digestive tract left/right asymmetry	0	0	0	0	0	0
determination of left/right asymmetry in lateral mesoderm	0	0	0	0	0	0
determination of left/right asymmetry in nervous system	0	0	0	0	0	0
determination of liver left/right asymmetry	0	0	0	0	0	0
determination of pancreatic left/right asymmetry	0	0	0	0	0	0
detoxification of copper ion	0	0	0	0	0	0
diacylglycerol metabolic process	0	0	0	0	0	0
diapedesis	0	0	0	0	0	0
diphosphoinositol polyphosphate catabolic process	0	0	0	0	0	0
distal tubule morphogenesis	0	0	0	0	0	0
diterpenoid metabolic process	0	0	0	0	0	0
dopamine metabolic process	0	0	0	0	0	0
dopamine receptor signaling pathway	0	0	0	0	0	0
dopamine uptake involved in synaptic transmission	0	0	0	0	0	0
early endosome to Golgi transport	0	0	0	0	0	0
elastin biosynthetic process	0	0	0	0	0	0
embryonic camera-type eye development	0	0	0	0	0	0
embryonic skeletal limb joint morphogenesis	0	0	0	0	0	0
endocardial cell differentiation	0	0	0	0	0	0
endocardial cushion cell fate commitment	0	0	0	0	0	0
endoplasmic reticulum unfolded protein response	0	0	0	0	0	0
endosome to lysosome transport	0	0	0	0	0	0
endosome to lysosome transport via multivesicular body sorting pathway	0	0	0	0	0	0
endothelin receptor signaling pathway	0	0	0	0	0	0
enteric smooth muscle cell differentiation	0	0	0	0	0	0
enucleate erythrocyte development	0	0	0	0	0	0
enzyme active site formation via L-cysteine persulfide	0	0	0	0	0	0
epinephrine metabolic process	0	0	0	0	0	0
epithelial cell differentiation involved in mammary gland alveolus development	0	0	0	0	0	0
epithelial cell migration	0	0	0	0	0	0
epithelial cell morphogenesis	0	0	0	0	0	0
epithelial to mesenchymal transition	0	0	0	0	0	0
ergosterol biosynthetic process	0	0	0	0	0	0
establishment of blood-nerve barrier	0	0	0	0	0	0
establishment of endothelial barrier	0	0	0	0	0	0
establishment of epithelial cell apical/basal polarity	0	0	0	0	0	0
establishment of meiotic spindle localization	0	0	0	0	0	0
establishment or maintenance of cell polarity regulating cell shape	0	0	0	0	0	0
estrogen biosynthetic process	0	0	0	0	0	0
ethanol catabolic process	0	0	0	0	0	0
ethanol oxidation	0	0	0	0	0	0
evasion or tolerance of host defenses by virus	0	0	0	0	0	0
extraocular skeletal muscle development	0	0	0	0	0	0
eye photoreceptor cell differentiation	0	0	0	0	0	0
eye pigment biosynthetic process	0	0	0	0	0	0
farnesol catabolic process	0	0	0	0	0	0
farnesyl diphosphate metabolic process	0	0	0	0	0	0
fatty acid homeostasis	0	0	0	0	0	0
female courtship behavior	0	0	0	0	0	0
female meiosis	0	0	0	0	0	0
female meiosis sister chromatid cohesion	0	0	0	0	0	0
fever generation	0	0	0	0	0	0
fibroblast apoptotic process	0	0	0	0	0	0
fibroblast migration	0	0	0	0	0	0
focal adhesion assembly	0	0	0	0	0	0
follicle-stimulating hormone signaling pathway	0	0	0	0	0	0
forebrain astrocyte development	0	0	0	0	0	0
forebrain neuron development	0	0	0	0	0	0
forebrain neuron differentiation	0	0	0	0	0	0
forebrain radial glial cell differentiation	0	0	0	0	0	0
formation of radial glial scaffolds	0	0	0	0	0	0
formation of translation initiation complex	0	0	0	0	0	0
fractalkine metabolic process	0	0	0	0	0	0
fructose metabolic process	0	0	0	0	0	0
fucose metabolic process	0	0	0	0	0	0
fusion of virus membrane with host plasma membrane	0	0	0	0	0	0
galactolipid catabolic process	0	0	0	0	0	0
galactose metabolic process	0	0	0	0	0	0
gamma-aminobutyric acid receptor clustering	0	0	0	0	0	0
gamma-delta T cell activation	0	0	0	0	0	0
geranyl diphosphate biosynthetic process	0	0	0	0	0	0
germ-line stem cell maintenance	0	0	0	0	0	0
glucosamine biosynthetic process	0	0	0	0	0	0
glucose metabolic process	0	0	0	0	0	0
glucose transport	0	0	0	0	0	0
glycerol metabolic process	0	0	0	0	0	0
glycerol-3-phosphate catabolic process	0	0	0	0	0	0
glycerophospholipid biosynthetic process	0	0	0	0	0	0
glycogen metabolic process	0	0	0	0	0	0
granulocyte macrophage colony-stimulating factor biosynthetic process	0	0	0	0	0	0
growth plate cartilage chondrocyte differentiation	0	0	0	0	0	0
heart jogging	0	0	0	0	0	0
heart looping	0	0	0	0	0	0
hematopoietic stem cell migration to bone marrow	0	0	0	0	0	0
heme biosynthetic process	0	0	0	0	0	0
heme oxidation	0	0	0	0	0	0
heparan sulfate proteoglycan catabolic process	0	0	0	0	0	0
heparin biosynthetic process	0	0	0	0	0	0
hepatocyte apoptotic process	0	0	0	0	0	0
hexose transmembrane transport	0	0	0	0	0	0
high-density lipoprotein particle assembly	0	0	0	0	0	0
high-density lipoprotein particle remodeling	0	0	0	0	0	0
histamine uptake	0	0	0	0	0	0
histone displacement	0	0	0	0	0	0
histone modification	0	0	0	0	0	0
hormone secretion	0	0	0	0	0	0
humoral immune response mediated by circulating immunoglobulin	0	0	0	0	0	0
hyaluronan biosynthetic process	0	0	0	0	0	0
hypoxia-inducible factor-1alpha signaling pathway	0	0	0	0	0	0
icosanoid metabolic process	0	0	0	0	0	0
immune response-activating cell surface receptor signaling pathway	0	0	0	0	0	0
immunoglobulin secretion	0	0	0	0	0	0
indolalkylamine biosynthetic process	0	0	0	0	0	0
induction of bacterial agglutination	0	0	0	0	0	0
induction of negative chemotaxis	0	0	0	0	0	0
induction of programmed cell death	0	0	0	0	0	0
inductive cell-cell signaling	0	0	0	0	0	0
inner cell mass cellular morphogenesis	0	0	0	0	0	0
inorganic diphosphate transport	0	0	0	0	0	0
inositol biosynthetic process	0	0	0	0	0	0
inositol phosphate biosynthetic process	0	0	0	0	0	0
inositol phosphate dephosphorylation	0	0	0	0	0	0
inositol phosphate-mediated signaling	0	0	0	0	0	0
inositol trisphosphate metabolic process	0	0	0	0	0	0
intein-mediated protein splicing	0	0	0	0	0	0
interferon-gamma-mediated signaling pathway	0	0	0	0	0	0
interleukin-1 beta biosynthetic process	0	0	0	0	0	0
interleukin-12-mediated signaling pathway	0	0	0	0	0	0
interleukin-13 biosynthetic process	0	0	0	0	0	0
interleukin-15-mediated signaling pathway	0	0	0	0	0	0
interleukin-2 biosynthetic process	0	0	0	0	0	0
interleukin-21-mediated signaling pathway	0	0	0	0	0	0
interleukin-27-mediated signaling pathway	0	0	0	0	0	0
interleukin-8 biosynthetic process	0	0	0	0	0	0
interleukin-9-mediated signaling pathway	0	0	0	0	0	0
intestinal epithelial cell development	0	0	0	0	0	0
intestinal epithelial cell differentiation	0	0	0	0	0	0
intestinal epithelial cell maturation	0	0	0	0	0	0
intracellular cholesterol transport	0	0	0	0	0	0
intracellular estrogen receptor signaling pathway	0	0	0	0	0	0
intracellular transport of viral protein in host cell	0	0	0	0	0	0
intraciliary transport	0	0	0	0	0	0
intrinsic apoptotic signaling pathway in response to DNA damage	0	0	0	0	0	0
iodide transport	0	0	0	0	0	0
ionotropic glutamate receptor signaling pathway	0	0	0	0	0	0
iron incorporation into metallo-sulfur cluster	0	0	0	0	0	0
iron ion transport	0	0	0	0	0	0
isopentenyl diphosphate biosynthetic process, mevalonate pathway	0	0	0	0	0	0
keratinocyte differentiation	0	0	0	0	0	0
lateral motor column neuron migration	0	0	0	0	0	0
learning	0	0	0	0	0	0
left ventricular cardiac muscle tissue morphogenesis	0	0	0	0	0	0
lens fiber cell morphogenesis	0	0	0	0	0	0
leptin-mediated signaling pathway	0	0	0	0	0	0
leukocyte chemotaxis	0	0	0	0	0	0
leukocyte migration involved in immune response	0	0	0	0	0	0
long term synaptic depression	0	0	0	0	0	0
long-chain fatty-acyl-CoA biosynthetic process	0	0	0	0	0	0
long-term synaptic potentiation	0	0	0	0	0	0
low-density lipoprotein particle remodeling	0	0	0	0	0	0
lung ciliated cell differentiation	0	0	0	0	0	0
lung goblet cell differentiation	0	0	0	0	0	0
luteinizing hormone signaling pathway	0	0	0	0	0	0
lymphatic endothelial cell differentiation	0	0	0	0	0	0
lymphocyte migration	0	0	0	0	0	0
lymphotoxin A biosynthetic process	0	0	0	0	0	0
mRNA metabolic process	0	0	0	0	0	0
mRNA transport	0	0	0	0	0	0
macrophage colony-stimulating factor signaling pathway	0	0	0	0	0	0
macrophage migration inhibitory factor signaling pathway	0	0	0	0	0	0
magnesium ion transport	0	0	0	0	0	0
maintenance of DNA methylation	0	0	0	0	0	0
maintenance of epithelial cell apical/basal polarity	0	0	0	0	0	0
maintenance of granzyme B location in T cell secretory granule	0	0	0	0	0	0
maintenance of protein location in plasma membrane	0	0	0	0	0	0
malate metabolic process	0	0	0	0	0	0
male meiosis	0	0	0	0	0	0
maltose metabolic process	0	0	0	0	0	0
manganese ion transport	0	0	0	0	0	0
mannose metabolic process	0	0	0	0	0	0
mast cell differentiation	0	0	0	0	0	0
meiosis I	0	0	0	0	0	0
meiotic spindle organization	0	0	0	0	0	0
melatonin biosynthetic process	0	0	0	0	0	0
membrane depolarization during SA node cell action potential	0	0	0	0	0	0
membrane raft polarization	0	0	0	0	0	0
membrane repolarization during SA node cell action potential	0	0	0	0	0	0
memory	0	0	0	0	0	0
mesenchymal smoothened signaling pathway involved in prostate gland development	0	0	0	0	0	0
mesonephric tubule formation	0	0	0	0	0	0
metal ion homeostasis	0	0	0	0	0	0
metanephric DCT cell differentiation	0	0	0	0	0	0
metanephric connecting tubule development	0	0	0	0	0	0
metanephric distal tubule development	0	0	0	0	0	0
metanephric glomerular endothelium development	0	0	0	0	0	0
metanephric glomerular mesangial cell development	0	0	0	0	0	0
metanephric loop of Henle development	0	0	0	0	0	0
metanephric mesenchymal cell differentiation	0	0	0	0	0	0
metanephric nephron tubule formation	0	0	0	0	0	0
metanephric nephron tubule morphogenesis	0	0	0	0	0	0
metanephric proximal tubule development	0	0	0	0	0	0
metanephric smooth muscle tissue development	0	0	0	0	0	0
miRNA loading onto RISC involved in gene silencing by miRNA	0	0	0	0	0	0
microglial cell activation	0	0	0	0	0	0
microtubule depolymerization	0	0	0	0	0	0
microtubule-dependent intracellular transport of viral material towards nucleus	0	0	0	0	0	0
mineralocorticoid receptor signaling pathway	0	0	0	0	0	0
mitochondrial ATP synthesis coupled electron transport	0	0	0	0	0	0
mitochondrial protein processing	0	0	0	0	0	0
mitochondrial respiratory chain complex assembly	0	0	0	0	0	0
mitochondrial translation	0	0	0	0	0	0
mitotic centrosome separation	0	0	0	0	0	0
mitotic nuclear envelope disassembly	0	0	0	0	0	0
mitotic spindle organization	0	0	0	0	0	0
modulation by virus of host process	0	0	0	0	0	0
monocarboxylic acid metabolic process	0	0	0	0	0	0
monocarboxylic acid transport	0	0	0	0	0	0
monocyte aggregation	0	0	0	0	0	0
monoterpenoid metabolic process	0	0	0	0	0	0
muscle filament sliding	0	0	0	0	0	0
myeloid dendritic cell activation involved in immune response	0	0	0	0	0	0
myoblast migration	0	0	0	0	0	0
myofibril assembly	0	0	0	0	0	0
natural killer cell differentiation	0	0	0	0	0	0
natural killer cell proliferation	0	0	0	0	0	0
ncRNA metabolic process	0	0	0	0	0	0
negative regulation of CD40 signaling pathway	0	0	0	0	0	0
negative regulation of DNA metabolic process	0	0	0	0	0	0
negative regulation of G-protein coupled receptor protein signaling pathway	0	0	0	0	0	0
negative regulation of MHC class II biosynthetic process	0	0	0	0	0	0
negative regulation of NAD(P)H oxidase activity	0	0	0	0	0	0
negative regulation of T cell cytokine production	0	0	0	0	0	0
negative regulation of T cell mediated cytotoxicity	0	0	0	0	0	0
negative regulation of Wnt signaling pathway	0	0	0	0	0	0
negative regulation of angiogenesis	0	0	0	0	0	0
negative regulation of apoptotic process	0	0	0	0	0	0
negative regulation of binding of sperm to zona pellucida	0	0	0	0	0	0
negative regulation of blood coagulation	0	0	0	0	0	0
negative regulation of bone resorption	0	0	0	0	0	0
negative regulation of bone trabecula formation	0	0	0	0	0	0
negative regulation of calcium-independent cell-cell adhesion	0	0	0	0	0	0
negative regulation of cardiac muscle adaptation	0	0	0	0	0	0
negative regulation of cell differentiation involved in embryonic placenta development	0	0	0	0	0	0
negative regulation of cell migration	0	0	0	0	0	0
negative regulation of cell proliferation involved in mesonephros development	0	0	0	0	0	0
negative regulation of cell-cell adhesion mediated by cadherin	0	0	0	0	0	0
negative regulation of cell-matrix adhesion	0	0	0	0	0	0
negative regulation of cellular protein metabolic process	0	0	0	0	0	0
negative regulation of cellular response to heat	0	0	0	0	0	0
negative regulation of cellular response to hypoxia	0	0	0	0	0	0
negative regulation of cellular response to testosterone stimulus	0	0	0	0	0	0
negative regulation of cellular senescence	0	0	0	0	0	0
negative regulation of chemokine (C-X-C motif) ligand 2 production	0	0	0	0	0	0
negative regulation of collagen catabolic process	0	0	0	0	0	0
negative regulation of cyclic-nucleotide phosphodiesterase activity	0	0	0	0	0	0
negative regulation of cytokine production involved in inflammatory response	0	0	0	0	0	0
negative regulation of cytokine-mediated signaling pathway	0	0	0	0	0	0
negative regulation of defense response to virus	0	0	0	0	0	0
negative regulation of dendritic cell cytokine production	0	0	0	0	0	0
negative regulation of dendritic cell dendrite assembly	0	0	0	0	0	0
negative regulation of determination of dorsal identity	0	0	0	0	0	0
negative regulation of endocytosis	0	0	0	0	0	0
negative regulation of endothelial cell differentiation	0	0	0	0	0	0
negative regulation of entry of bacterium into host cell	0	0	0	0	0	0
negative regulation of epidermal cell differentiation	0	0	0	0	0	0
negative regulation of epithelial cell proliferation involved in lung morphogenesis	0	0	0	0	0	0
negative regulation of epithelial cell proliferation involved in prostate gland development	0	0	0	0	0	0
negative regulation of estrogen receptor binding	0	0	0	0	0	0
negative regulation of exocytosis	0	0	0	0	0	0
negative regulation of filopodium assembly	0	0	0	0	0	0
negative regulation of glomerulus development	0	0	0	0	0	0
negative regulation of glycogen (starch) synthase activity	0	0	0	0	0	0
negative regulation of growth of symbiont on or near host surface	0	0	0	0	0	0
negative regulation of guanylate cyclase activity	0	0	0	0	0	0
negative regulation of hair follicle development	0	0	0	0	0	0
negative regulation of helicase activity	0	0	0	0	0	0
negative regulation of hemoglobin biosynthetic process	0	0	0	0	0	0
negative regulation of hepatocyte proliferation	0	0	0	0	0	0
negative regulation of homotypic cell-cell adhesion	0	0	0	0	0	0
negative regulation of hydrogen peroxide metabolic process	0	0	0	0	0	0
negative regulation of inflammatory response	0	0	0	0	0	0
negative regulation of innate immune response	0	0	0	0	0	0
negative regulation of integrin biosynthetic process	0	0	0	0	0	0
negative regulation of integrin-mediated signaling pathway	0	0	0	0	0	0
negative regulation of interferon-beta production	0	0	0	0	0	0
negative regulation of interleukin-1 beta production	0	0	0	0	0	0
negative regulation of intracellular steroid hormone receptor signaling pathway	0	0	0	0	0	0
negative regulation of lamellipodium assembly	0	0	0	0	0	0
negative regulation of lamellipodium morphogenesis	0	0	0	0	0	0
negative regulation of lipase activity	0	0	0	0	0	0
negative regulation of lipid catabolic process	0	0	0	0	0	0
negative regulation of lipoprotein metabolic process	0	0	0	0	0	0
negative regulation of lymphocyte activation	0	0	0	0	0	0
negative regulation of macrophage activation	0	0	0	0	0	0
negative regulation of macrophage derived foam cell differentiation	0	0	0	0	0	0
negative regulation of macrophage inflammatory protein 1 alpha production	0	0	0	0	0	0
negative regulation of mammary gland epithelial cell proliferation	0	0	0	0	0	0
negative regulation of mast cell activation	0	0	0	0	0	0
negative regulation of mast cell cytokine production	0	0	0	0	0	0
negative regulation of mast cell proliferation	0	0	0	0	0	0
negative regulation of megakaryocyte differentiation	0	0	0	0	0	0
negative regulation of meiosis	0	0	0	0	0	0
negative regulation of mesenchymal cell proliferation	0	0	0	0	0	0
negative regulation of metanephric S-shaped body morphogenesis	0	0	0	0	0	0
negative regulation of metanephric comma-shaped body morphogenesis	0	0	0	0	0	0
negative regulation of mitochondrial depolarization	0	0	0	0	0	0
negative regulation of mitochondrial fusion	0	0	0	0	0	0
negative regulation of monocyte chemotactic protein-1 production	0	0	0	0	0	0
negative regulation of mononuclear cell proliferation	0	0	0	0	0	0
negative regulation of monooxygenase activity	0	0	0	0	0	0
negative regulation of muscle contraction	0	0	0	0	0	0
negative regulation of muscle hyperplasia	0	0	0	0	0	0
negative regulation of muscle hypertrophy	0	0	0	0	0	0
negative regulation of myelination	0	0	0	0	0	0
negative regulation of myeloid dendritic cell activation	0	0	0	0	0	0
negative regulation of necroptotic process	0	0	0	0	0	0
negative regulation of neurogenesis	0	0	0	0	0	0
negative regulation of nitric oxide biosynthetic process	0	0	0	0	0	0
negative regulation of nitric-oxide synthase biosynthetic process	0	0	0	0	0	0
negative regulation of norepinephrine uptake	0	0	0	0	0	0
negative regulation of nuclease activity	0	0	0	0	0	0
negative regulation of odontogenesis	0	0	0	0	0	0
negative regulation of osteoclast proliferation	0	0	0	0	0	0
negative regulation of oxidative phosphorylation uncoupler activity	0	0	0	0	0	0
negative regulation of pancreatic A cell differentiation	0	0	0	0	0	0
negative regulation of pancreatic juice secretion	0	0	0	0	0	0
negative regulation of peptidase activity	0	0	0	0	0	0
negative regulation of peptide secretion	0	0	0	0	0	0
negative regulation of peroxisome proliferator activated receptor signaling pathway	0	0	0	0	0	0
negative regulation of positive chemotaxis	0	0	0	0	0	0
negative regulation of protein localization to nucleus	0	0	0	0	0	0
negative regulation of protein processing	0	0	0	0	0	0
negative regulation of protein transport	0	0	0	0	0	0
negative regulation of receptor activity	0	0	0	0	0	0
negative regulation of receptor recycling	0	0	0	0	0	0
negative regulation of release of cytochrome c from mitochondria	0	0	0	0	0	0
negative regulation of retinal cell programmed cell death	0	0	0	0	0	0
negative regulation of retinoic acid receptor signaling pathway	0	0	0	0	0	0
negative regulation of ruffle assembly	0	0	0	0	0	0
negative regulation of serotonin uptake	0	0	0	0	0	0
negative regulation of sister chromatid cohesion	0	0	0	0	0	0
negative regulation of smooth muscle cell differentiation	0	0	0	0	0	0
negative regulation of smoothened signaling pathway	0	0	0	0	0	0
negative regulation of striated muscle tissue development	0	0	0	0	0	0
negative regulation of synapse assembly	0	0	0	0	0	0
negative regulation of synapse maturation	0	0	0	0	0	0
negative regulation of synaptic plasticity	0	0	0	0	0	0
negative regulation of synaptic transmission, cholinergic	0	0	0	0	0	0
negative regulation of synaptic vesicle clustering	0	0	0	0	0	0
negative regulation of thymidylate synthase biosynthetic process	0	0	0	0	0	0
negative regulation of tooth mineralization	0	0	0	0	0	0
negative regulation of transforming growth factor beta1 production	0	0	0	0	0	0
negative regulation of transforming growth factor beta2 production	0	0	0	0	0	0
negative regulation of transforming growth factor beta3 production	0	0	0	0	0	0
negative regulation of vascular permeability	0	0	0	0	0	0
negative regulation of viral genome replication	0	0	0	0	0	0
nephron tubule epithelial cell differentiation	0	0	0	0	0	0
nerve growth factor signaling pathway	0	0	0	0	0	0
neural crest cell migration	0	0	0	0	0	0
neuroepithelial cell differentiation	0	0	0	0	0	0
neuron apoptotic process	0	0	0	0	0	0
neuron projection morphogenesis	0	0	0	0	0	0
neuropeptide catabolic process	0	0	0	0	0	0
neuropeptide signaling pathway	0	0	0	0	0	0
neurotransmitter receptor biosynthetic process	0	0	0	0	0	0
neurotransmitter secretion	0	0	0	0	0	0
neutrophil activation	0	0	0	0	0	0
nicotinamide riboside catabolic process	0	0	0	0	0	0
nitrate catabolic process	0	0	0	0	0	0
norepinephrine metabolic process	0	0	0	0	0	0
norepinephrine secretion	0	0	0	0	0	0
nucleoside triphosphate biosynthetic process	0	0	0	0	0	0
nucleoside triphosphate catabolic process	0	0	0	0	0	0
nucleosome assembly	0	0	0	0	0	0
nucleotide metabolic process	0	0	0	0	0	0
nucleotide-excision repair, DNA gap filling	0	0	0	0	0	0
oligodendrocyte cell fate commitment	0	0	0	0	0	0
oncosis	0	0	0	0	0	0
osteoclast differentiation	0	0	0	0	0	0
oxalate transport	0	0	0	0	0	0
oxidative stress-induced premature senescence	0	0	0	0	0	0
pancreatic A cell development	0	0	0	0	0	0
pentacyclic triterpenoid metabolic process	0	0	0	0	0	0
pentose biosynthetic process	0	0	0	0	0	0
pentose-phosphate shunt, non-oxidative branch	0	0	0	0	0	0
pentose-phosphate shunt, oxidative branch	0	0	0	0	0	0
peptide amidation	0	0	0	0	0	0
peptide antigen stabilization	0	0	0	0	0	0
peptide hormone processing	0	0	0	0	0	0
peptidyl-cysteine S-nitrosylation	0	0	0	0	0	0
peptidyl-glutamic acid carboxylation	0	0	0	0	0	0
peptidyl-lysine modification	0	0	0	0	0	0
peptidyl-methionine modification	0	0	0	0	0	0
peptidyl-pyrromethane cofactor linkage	0	0	0	0	0	0
peripheral nervous system axon regeneration	0	0	0	0	0	0
phagosome-lysosome fusion	0	0	0	0	0	0
phosphate ion transport	0	0	0	0	0	0
phosphatidylcholine metabolic process	0	0	0	0	0	0
phosphatidylinositol metabolic process	0	0	0	0	0	0
phosphatidylinositol-mediated signaling	0	0	0	0	0	0
phospholipase C-activating G-protein coupled receptor signaling pathway	0	0	0	0	0	0
phospholipase D-activating G-protein coupled receptor signaling pathway	0	0	0	0	0	0
phospholipid transport	0	0	0	0	0	0
phototransduction, visible light	0	0	0	0	0	0
phthalate metabolic process	0	0	0	0	0	0
phylloquinone catabolic process	0	0	0	0	0	0
plasma kallikrein-kinin cascade	0	0	0	0	0	0
plasma lipoprotein particle oxidation	0	0	0	0	0	0
platelet degranulation	0	0	0	0	0	0
polyamine metabolic process	0	0	0	0	0	0
polyubiquitinated misfolded protein transport	0	0	0	0	0	0
positive regulation of B cell activation	0	0	0	0	0	0
positive regulation of B cell tolerance induction	0	0	0	0	0	0
positive regulation of DNA metabolic process	0	0	0	0	0	0
positive regulation of Fc receptor mediated stimulatory signaling pathway	0	0	0	0	0	0
positive regulation of G-protein coupled receptor protein signaling pathway	0	0	0	0	0	0
positive regulation of G0 to G1 transition	0	0	0	0	0	0
positive regulation of MHC class I biosynthetic process	0	0	0	0	0	0
positive regulation of MHC class II biosynthetic process	0	0	0	0	0	0
positive regulation of NAD+ ADP-ribosyltransferase activity	0	0	0	0	0	0
positive regulation of NIK/NF-kappaB signaling	0	0	0	0	0	0
positive regulation of Notch signaling pathway	0	0	0	0	0	0
positive regulation of Wnt signaling pathway	0	0	0	0	0	0
positive regulation of actin filament bundle assembly	0	0	0	0	0	0
positive regulation of adenylate cyclase activity	0	0	0	0	0	0
positive regulation of angiogenesis	0	0	0	0	0	0
positive regulation of antigen processing and presentation of peptide antigen via MHC class I	0	0	0	0	0	0
positive regulation of antigen processing and presentation of peptide antigen via MHC class II	0	0	0	0	0	0
positive regulation of antral ovarian follicle growth	0	0	0	0	0	0
positive regulation of apoptotic process	0	0	0	0	0	0
positive regulation of apoptotic signaling pathway	0	0	0	0	0	0
positive regulation of behavioral fear response	0	0	0	0	0	0
positive regulation of bone resorption	0	0	0	0	0	0
positive regulation of branching involved in lung morphogenesis	0	0	0	0	0	0
positive regulation of branching involved in ureteric bud morphogenesis	0	0	0	0	0	0
positive regulation of brown fat cell differentiation	0	0	0	0	0	0
positive regulation of calcium-dependent cell-cell adhesion	0	0	0	0	0	0
positive regulation of cell fate specification	0	0	0	0	0	0
positive regulation of cell migration	0	0	0	0	0	0
positive regulation of cell-cell adhesion mediated by cadherin	0	0	0	0	0	0
positive regulation of cell-cell adhesion mediated by integrin	0	0	0	0	0	0
positive regulation of cellular glucuronidation	0	0	0	0	0	0
positive regulation of cellular protein metabolic process	0	0	0	0	0	0
positive regulation of cellular senescence	0	0	0	0	0	0
positive regulation of cerebellar granule cell precursor proliferation	0	0	0	0	0	0
positive regulation of chemokine (C-C motif) ligand 5 production	0	0	0	0	0	0
positive regulation of cholesterol esterification	0	0	0	0	0	0
positive regulation of chondrocyte differentiation	0	0	0	0	0	0
positive regulation of cilium assembly	0	0	0	0	0	0
positive regulation of cyclic-nucleotide phosphodiesterase activity	0	0	0	0	0	0
positive regulation of cytokine activity	0	0	0	0	0	0
positive regulation of cytokine biosynthetic process	0	0	0	0	0	0
positive regulation of dendritic cell cytokine production	0	0	0	0	0	0
positive regulation of dendritic cell dendrite assembly	0	0	0	0	0	0
positive regulation of dipeptide transmembrane transport	0	0	0	0	0	0
positive regulation of early endosome to late endosome transport	0	0	0	0	0	0
positive regulation of endocytic recycling	0	0	0	0	0	0
positive regulation of endocytosis	0	0	0	0	0	0
positive regulation of endothelial cell differentiation	0	0	0	0	0	0
positive regulation of endothelial cell proliferation	0	0	0	0	0	0
positive regulation of ephrin receptor signaling pathway	0	0	0	0	0	0
positive regulation of epithelial cell proliferation involved in prostate gland development	0	0	0	0	0	0
positive regulation of epithelial cell proliferation involved in wound healing	0	0	0	0	0	0
positive regulation of exocytosis	0	0	0	0	0	0
positive regulation of extracellular matrix constituent secretion	0	0	0	0	0	0
positive regulation of fibroblast growth factor receptor signaling pathway	0	0	0	0	0	0
positive regulation of gamma-aminobutyric acid secretion	0	0	0	0	0	0
positive regulation of gene expression involved in extracellular matrix organization	0	0	0	0	0	0
positive regulation of gene silencing by miRNA	0	0	0	0	0	0
positive regulation of glutamate metabolic process	0	0	0	0	0	0
positive regulation of glycogen (starch) synthase activity	0	0	0	0	0	0
positive regulation of granulocyte colony-stimulating factor production	0	0	0	0	0	0
positive regulation of granzyme A production	0	0	0	0	0	0
positive regulation of granzyme B production	0	0	0	0	0	0
positive regulation of growth hormone receptor signaling pathway	0	0	0	0	0	0
positive regulation of guanylate cyclase activity	0	0	0	0	0	0
positive regulation of hair follicle development	0	0	0	0	0	0
positive regulation of hemoglobin biosynthetic process	0	0	0	0	0	0
positive regulation of hepatocyte proliferation	0	0	0	0	0	0
positive regulation of heterotypic cell-cell adhesion	0	0	0	0	0	0
positive regulation of homotypic cell-cell adhesion	0	0	0	0	0	0
positive regulation of hormone biosynthetic process	0	0	0	0	0	0
positive regulation of hormone secretion	0	0	0	0	0	0
positive regulation of humoral immune response mediated by circulating immunoglobulin	0	0	0	0	0	0
positive regulation of hyaluronan biosynthetic process	0	0	0	0	0	0
positive regulation of hydrogen peroxide biosynthetic process	0	0	0	0	0	0
positive regulation of hydrogen peroxide-mediated programmed cell death	0	0	0	0	0	0
positive regulation of immunoglobulin production	0	0	0	0	0	0
positive regulation of inflammatory response	0	0	0	0	0	0
positive regulation of innate immune response	0	0	0	0	0	0
positive regulation of inositol phosphate biosynthetic process	0	0	0	0	0	0
positive regulation of insulin-like growth factor receptor signaling pathway	0	0	0	0	0	0
positive regulation of integrin biosynthetic process	0	0	0	0	0	0
positive regulation of integrin-mediated signaling pathway	0	0	0	0	0	0
positive regulation of interleukin-1 alpha production	0	0	0	0	0	0
positive regulation of interleukin-1 beta production	0	0	0	0	0	0
positive regulation of intestinal epithelial structure maintenance	0	0	0	0	0	0
positive regulation of ion transmembrane transport	0	0	0	0	0	0
positive regulation of keratinocyte proliferation	0	0	0	0	0	0
positive regulation of lamellipodium assembly	0	0	0	0	0	0
positive regulation of lens epithelial cell proliferation	0	0	0	0	0	0
positive regulation of leukocyte mediated cytotoxicity	0	0	0	0	0	0
positive regulation of lipid biosynthetic process	0	0	0	0	0	0
positive regulation of lipid catabolic process	0	0	0	0	0	0
positive regulation of lipoprotein lipase activity	0	0	0	0	0	0
positive regulation of lung goblet cell differentiation	0	0	0	0	0	0
positive regulation of lymphangiogenesis	0	0	0	0	0	0
positive regulation of macrophage fusion	0	0	0	0	0	0
positive regulation of macrophage tolerance induction	0	0	0	0	0	0
positive regulation of mammary gland epithelial cell proliferation	0	0	0	0	0	0
positive regulation of mast cell proliferation	0	0	0	0	0	0
positive regulation of meiosis	0	0	0	0	0	0
positive regulation of melanocyte differentiation	0	0	0	0	0	0
positive regulation of mesenchymal cell proliferation	0	0	0	0	0	0
positive regulation of metanephric glomerulus development	0	0	0	0	0	0
positive regulation of metanephric ureteric bud development	0	0	0	0	0	0
positive regulation of miRNA metabolic process	0	0	0	0	0	0
positive regulation of mitochondrial depolarization	0	0	0	0	0	0
positive regulation of mitochondrial fission	0	0	0	0	0	0
positive regulation of mitochondrial membrane permeability	0	0	0	0	0	0
positive regulation of mitotic cell cycle, embryonic	0	0	0	0	0	0
positive regulation of monocyte chemotactic protein-1 production	0	0	0	0	0	0
positive regulation of mononuclear cell proliferation	0	0	0	0	0	0
positive regulation of mucus secretion	0	0	0	0	0	0
positive regulation of myelination	0	0	0	0	0	0
positive regulation of myeloid dendritic cell activation	0	0	0	0	0	0
positive regulation of myeloid leukocyte differentiation	0	0	0	0	0	0
positive regulation of neurogenesis	0	0	0	0	0	0
positive regulation of neurotransmitter secretion	0	0	0	0	0	0
positive regulation of neurotrophin TRK receptor signaling pathway	0	0	0	0	0	0
positive regulation of nitric oxide biosynthetic process	0	0	0	0	0	0
positive regulation of nitric-oxide synthase biosynthetic process	0	0	0	0	0	0
positive regulation of nuclease activity	0	0	0	0	0	0
positive regulation of nucleocytoplasmic transport	0	0	0	0	0	0
positive regulation of nucleoside transport	0	0	0	0	0	0
positive regulation of optic nerve formation	0	0	0	0	0	0
positive regulation of ovarian follicle development	0	0	0	0	0	0
positive regulation of oxidative phosphorylation uncoupler activity	0	0	0	0	0	0
positive regulation of pancreatic juice secretion	0	0	0	0	0	0
positive regulation of pancreatic stellate cell proliferation	0	0	0	0	0	0
positive regulation of peptidase activity	0	0	0	0	0	0
positive regulation of peptide secretion	0	0	0	0	0	0
positive regulation of peroxisome proliferator activated receptor signaling pathway	0	0	0	0	0	0
positive regulation of phospholipid scramblase activity	0	0	0	0	0	0
positive regulation of podosome assembly	0	0	0	0	0	0
positive regulation of polarized epithelial cell differentiation	0	0	0	0	0	0
positive regulation of positive chemotaxis	0	0	0	0	0	0
positive regulation of prostaglandin-E synthase activity	0	0	0	0	0	0
positive regulation of prostaglandin-endoperoxide synthase activity	0	0	0	0	0	0
positive regulation of protein homooligomerization	0	0	0	0	0	0
positive regulation of protein kinase C signaling	0	0	0	0	0	0
positive regulation of protein processing	0	0	0	0	0	0
positive regulation of protein transport	0	0	0	0	0	0
positive regulation of release of cytochrome c from mitochondria	0	0	0	0	0	0
positive regulation of response to DNA damage stimulus	0	0	0	0	0	0
positive regulation of ruffle assembly	0	0	0	0	0	0
positive regulation of satellite cell activation involved in skeletal muscle regeneration	0	0	0	0	0	0
positive regulation of sclerotome development	0	0	0	0	0	0
positive regulation of semaphorin-plexin signaling pathway involved in outflow tract morphogenesis	0	0	0	0	0	0
positive regulation of skeletal muscle tissue regeneration	0	0	0	0	0	0
positive regulation of smooth muscle cell differentiation	0	0	0	0	0	0
positive regulation of smoothened signaling pathway	0	0	0	0	0	0
positive regulation of striated muscle tissue development	0	0	0	0	0	0
positive regulation of synaptic transmission, dopaminergic	0	0	0	0	0	0
positive regulation of synaptic transmission, glutamatergic	0	0	0	0	0	0
positive regulation of thyroid hormone generation	0	0	0	0	0	0
positive regulation of tolerance induction to self antigen	0	0	0	0	0	0
positive regulation of tooth mineralization	0	0	0	0	0	0
positive regulation of transforming growth factor beta1 production	0	0	0	0	0	0
positive regulation of transforming growth factor beta2 production	0	0	0	0	0	0
positive regulation of transforming growth factor beta3 production	0	0	0	0	0	0
positive regulation of transmission of nerve impulse	0	0	0	0	0	0
positive regulation of type B pancreatic cell development	0	0	0	0	0	0
positive regulation of ureteric bud formation	0	0	0	0	0	0
positive regulation of vascular endothelial growth factor signaling pathway	0	0	0	0	0	0
positive regulation of vesicle fusion	0	0	0	0	0	0
positive regulation of viral genome replication	0	0	0	0	0	0
positive regulation of vitamin D 24-hydroxylase activity	0	0	0	0	0	0
post-embryonic camera-type eye development	0	0	0	0	0	0
post-translational protein modification	0	0	0	0	0	0
posterior compartment specification	0	0	0	0	0	0
posttranslational protein targeting to membrane, translocation	0	0	0	0	0	0
potassium ion transport	0	0	0	0	0	0
primary heart field specification	0	0	0	0	0	0
primary prostatic bud elongation	0	0	0	0	0	0
primitive erythrocyte differentiation	0	0	0	0	0	0
primitive hemopoiesis	0	0	0	0	0	0
pro-T cell differentiation	0	0	0	0	0	0
progesterone metabolic process	0	0	0	0	0	0
pronephric field specification	0	0	0	0	0	0
proprioception involved in equilibrioception	0	0	0	0	0	0
prostate epithelial cord arborization involved in prostate glandular acinus morphogenesis	0	0	0	0	0	0
prostate epithelial cord elongation	0	0	0	0	0	0
proteasome assembly	0	0	0	0	0	0
protein acetylation	0	0	0	0	0	0
protein adenylylation	0	0	0	0	0	0
protein amidation	0	0	0	0	0	0
protein autoprocessing	0	0	0	0	0	0
protein de-ADP-ribosylation	0	0	0	0	0	0
protein deamination	0	0	0	0	0	0
protein deglycosylation	0	0	0	0	0	0
protein export from nucleus	0	0	0	0	0	0
protein glycosylation	0	0	0	0	0	0
protein heterooligomerization	0	0	0	0	0	0
protein hexamerization	0	0	0	0	0	0
protein homooligomerization	0	0	0	0	0	0
protein import into mitochondrial matrix	0	0	0	0	0	0
protein import into mitochondrial outer membrane	0	0	0	0	0	0
protein import into nucleus, docking	0	0	0	0	0	0
protein import into peroxisome matrix, substrate release	0	0	0	0	0	0
protein insertion into mitochondrial membrane involved in apoptotic signaling pathway	0	0	0	0	0	0
protein kinase C deactivation	0	0	0	0	0	0
protein kinase C-activating G-protein coupled receptor signaling pathway	0	0	0	0	0	0
protein lipoylation	0	0	0	0	0	0
protein localization to T-tubule	0	0	0	0	0	0
protein localization to centrosome	0	0	0	0	0	0
protein localization to chromosome, centromeric region	0	0	0	0	0	0
protein localization to kinetochore	0	0	0	0	0	0
protein localization to nuclear pore	0	0	0	0	0	0
protein maturation by protein folding	0	0	0	0	0	0
protein modification by small protein conjugation	0	0	0	0	0	0
protein modification by small protein removal	0	0	0	0	0	0
protein oxidation	0	0	0	0	0	0
protein phosphorylation	0	0	0	0	0	0
protein polymerization	0	0	0	0	0	0
protein secretion by platelet	0	0	0	0	0	0
protein sulfation	0	0	0	0	0	0
protein targeting to ER	0	0	0	0	0	0
protein targeting to lysosome	0	0	0	0	0	0
protein targeting to membrane	0	0	0	0	0	0
protein targeting to mitochondrion	0	0	0	0	0	0
protein tetramerization	0	0	0	0	0	0
protein trimerization	0	0	0	0	0	0
protein-chromophore linkage	0	0	0	0	0	0
protein-pyridoxal-5-phosphate linkage	0	0	0	0	0	0
proteolysis	0	0	0	0	0	0
proton transport	0	0	0	0	0	0
protoporphyrinogen IX biosynthetic process	0	0	0	0	0	0
pulmonary artery endothelial tube morphogenesis	0	0	0	0	0	0
purine nucleoside metabolic process	0	0	0	0	0	0
purine ribonucleotide transport	0	0	0	0	0	0
pyrimidine nucleoside metabolic process	0	0	0	0	0	0
quinolinate biosynthetic process	0	0	0	0	0	0
rRNA transport	0	0	0	0	0	0
receptor guanylyl cyclase signaling pathway	0	0	0	0	0	0
receptor internalization involved in canonical Wnt signaling pathway	0	0	0	0	0	0
receptor-mediated virion attachment to host cell	0	0	0	0	0	0
red, far-red light phototransduction	0	0	0	0	0	0
regulation of ATPase activity	0	0	0	0	0	0
regulation of B cell cytokine production	0	0	0	0	0	0
regulation of B cell proliferation	0	0	0	0	0	0
regulation of BMP signaling pathway	0	0	0	0	0	0
regulation of DNA damage checkpoint	0	0	0	0	0	0
regulation of DNA repair	0	0	0	0	0	0
regulation of DNA replication	0	0	0	0	0	0
regulation of G2/M transition of mitotic cell cycle	0	0	0	0	0	0
regulation of GTP catabolic process	0	0	0	0	0	0
regulation of I-kappaB kinase/NF-kappaB signaling	0	0	0	0	0	0
regulation of JAK-STAT cascade	0	0	0	0	0	0
regulation of MyD88-dependent toll-like receptor signaling pathway	0	0	0	0	0	0
regulation of MyD88-independent toll-like receptor signaling pathway	0	0	0	0	0	0
regulation of RIG-I signaling pathway	0	0	0	0	0	0
regulation of RNA biosynthetic process	0	0	0	0	0	0
regulation of RNA splicing	0	0	0	0	0	0
regulation of T cell activation	0	0	0	0	0	0
regulation of T cell anergy	0	0	0	0	0	0
regulation of TOR signaling	0	0	0	0	0	0
regulation of acetylcholine secretion, neurotransmission	0	0	0	0	0	0
regulation of actin cytoskeleton organization by cell-cell adhesion	0	0	0	0	0	0
regulation of actin filament length	0	0	0	0	0	0
regulation of actin nucleation	0	0	0	0	0	0
regulation of adrenergic receptor signaling pathway	0	0	0	0	0	0
regulation of aldosterone metabolic process	0	0	0	0	0	0
regulation of autophagic vacuole assembly	0	0	0	0	0	0
regulation of blood volume by renal aldosterone	0	0	0	0	0	0
regulation of branch elongation involved in ureteric bud branching	0	0	0	0	0	0
regulation of branching involved in salivary gland morphogenesis by epithelial-mesenchymal signaling	0	0	0	0	0	0
regulation of cAMP-mediated signaling	0	0	0	0	0	0
regulation of cGMP-mediated signaling	0	0	0	0	0	0
regulation of calcium ion transport	0	0	0	0	0	0
regulation of calcium-mediated signaling	0	0	0	0	0	0
regulation of canonical Wnt signaling pathway	0	0	0	0	0	0
regulation of cardiac muscle tissue development	0	0	0	0	0	0
regulation of cell motility involved in somitogenic axis elongation	0	0	0	0	0	0
regulation of centriole-centriole cohesion	0	0	0	0	0	0
regulation of centrosome cycle	0	0	0	0	0	0
regulation of cholesterol metabolic process	0	0	0	0	0	0
regulation of cholesterol transport	0	0	0	0	0	0
regulation of chromosome condensation	0	0	0	0	0	0
regulation of chronic inflammatory response	0	0	0	0	0	0
regulation of cilium beat frequency involved in ciliary motility	0	0	0	0	0	0
regulation of clathrin-mediated endocytosis	0	0	0	0	0	0
regulation of cohesin localization to chromatin	0	0	0	0	0	0
regulation of complement activation	0	0	0	0	0	0
regulation of defense response to virus by host	0	0	0	0	0	0
regulation of dephosphorylation	0	0	0	0	0	0
regulation of dopamine uptake involved in synaptic transmission	0	0	0	0	0	0
regulation of endodeoxyribonuclease activity	0	0	0	0	0	0
regulation of endodermal cell fate specification	0	0	0	0	0	0
regulation of endopeptidase activity	0	0	0	0	0	0
regulation of endoribonuclease activity	0	0	0	0	0	0
regulation of epithelial cell migration	0	0	0	0	0	0
regulation of exit from mitosis	0	0	0	0	0	0
regulation of exocyst assembly	0	0	0	0	0	0
regulation of extrinsic apoptotic signaling pathway	0	0	0	0	0	0
regulation of focal adhesion assembly	0	0	0	0	0	0
regulation of gliogenesis	0	0	0	0	0	0
regulation of glomerular mesangial cell proliferation	0	0	0	0	0	0
regulation of glucocorticoid metabolic process	0	0	0	0	0	0
regulation of growth hormone secretion	0	0	0	0	0	0
regulation of heart rate by cardiac conduction	0	0	0	0	0	0
regulation of heart rate by chemical signal	0	0	0	0	0	0
regulation of hippo signaling	0	0	0	0	0	0
regulation of inositol trisphosphate biosynthetic process	0	0	0	0	0	0
regulation of insulin secretion	0	0	0	0	0	0
regulation of interleukin-1-mediated signaling pathway	0	0	0	0	0	0
regulation of intracellular estrogen receptor signaling pathway	0	0	0	0	0	0
regulation of intracellular protein transport	0	0	0	0	0	0
regulation of intrinsic apoptotic signaling pathway	0	0	0	0	0	0
regulation of ion transmembrane transporter activity	0	0	0	0	0	0
regulation of kinetochore assembly	0	0	0	0	0	0
regulation of lateral mesodermal cell fate specification	0	0	0	0	0	0
regulation of leukocyte migration	0	0	0	0	0	0
regulation of lipoprotein lipid oxidation	0	0	0	0	0	0
regulation of low-density lipoprotein particle receptor catabolic process	0	0	0	0	0	0
regulation of lymphocyte differentiation	0	0	0	0	0	0
regulation of mast cell differentiation	0	0	0	0	0	0
regulation of membrane depolarization during cardiac muscle cell action potential	0	0	0	0	0	0
regulation of mesenchymal cell proliferation involved in prostate gland development	0	0	0	0	0	0
regulation of microtubule polymerization or depolymerization	0	0	0	0	0	0
regulation of mitotic sister chromatid separation	0	0	0	0	0	0
regulation of mitotic spindle organization	0	0	0	0	0	0
regulation of monocyte differentiation	0	0	0	0	0	0
regulation of muscle filament sliding	0	0	0	0	0	0
regulation of myosin II filament organization	0	0	0	0	0	0
regulation of myotube differentiation	0	0	0	0	0	0
regulation of natural killer cell activation	0	0	0	0	0	0
regulation of nephron tubule epithelial cell differentiation	0	0	0	0	0	0
regulation of nerve growth factor receptor activity	0	0	0	0	0	0
regulation of neuron apoptotic process	0	0	0	0	0	0
regulation of neuron differentiation	0	0	0	0	0	0
regulation of neuron migration	0	0	0	0	0	0
regulation of neuronal synaptic plasticity	0	0	0	0	0	0
regulation of neutrophil degranulation	0	0	0	0	0	0
regulation of nitric-oxide synthase activity	0	0	0	0	0	0
regulation of nucleotide-binding oligomerization domain containing signaling pathway	0	0	0	0	0	0
regulation of odontogenesis of dentin-containing tooth	0	0	0	0	0	0
regulation of opioid receptor signaling pathway	0	0	0	0	0	0
regulation of osteoclast differentiation	0	0	0	0	0	0
regulation of peptidyl-cysteine S-nitrosylation	0	0	0	0	0	0
regulation of phagocytosis	0	0	0	0	0	0
regulation of phosphatidylcholine catabolic process	0	0	0	0	0	0
regulation of phospholipase activity	0	0	0	0	0	0
regulation of phosphorylation	0	0	0	0	0	0
regulation of potassium ion transport	0	0	0	0	0	0
regulation of progesterone secretion	0	0	0	0	0	0
regulation of prostatic bud formation	0	0	0	0	0	0
regulation of protein deubiquitination	0	0	0	0	0	0
regulation of protein folding in endoplasmic reticulum	0	0	0	0	0	0
regulation of protein kinase B signaling	0	0	0	0	0	0
regulation of protein secretion	0	0	0	0	0	0
regulation of protein stability	0	0	0	0	0	0
regulation of protein sumoylation	0	0	0	0	0	0
regulation of protein ubiquitination	0	0	0	0	0	0
regulation of proteinase activated receptor activity	0	0	0	0	0	0
regulation of proteolysis	0	0	0	0	0	0
regulation of relaxation of cardiac muscle	0	0	0	0	0	0
regulation of removal of superoxide radicals	0	0	0	0	0	0
regulation of renal sodium excretion	0	0	0	0	0	0
regulation of rhodopsin mediated signaling pathway	0	0	0	0	0	0
regulation of rubidium ion transport	0	0	0	0	0	0
regulation of sarcomere organization	0	0	0	0	0	0
regulation of secondary heart field cardioblast proliferation	0	0	0	0	0	0
regulation of signal transduction by receptor internalization	0	0	0	0	0	0
regulation of single stranded viral RNA replication via double stranded DNA intermediate	0	0	0	0	0	0
regulation of skeletal muscle adaptation	0	0	0	0	0	0
regulation of skeletal muscle tissue development	0	0	0	0	0	0
regulation of small GTPase mediated signal transduction	0	0	0	0	0	0
regulation of smooth muscle contraction	0	0	0	0	0	0
regulation of sodium ion transport	0	0	0	0	0	0
regulation of spindle assembly	0	0	0	0	0	0
regulation of spindle checkpoint	0	0	0	0	0	0
regulation of steroid biosynthetic process	0	0	0	0	0	0
regulation of stress fiber assembly	0	0	0	0	0	0
regulation of striated muscle contraction	0	0	0	0	0	0
regulation of superoxide anion generation	0	0	0	0	0	0
regulation of synaptic growth at neuromuscular junction	0	0	0	0	0	0
regulation of synaptic vesicle exocytosis	0	0	0	0	0	0
regulation of systemic arterial blood pressure by vasopressin	0	0	0	0	0	0
regulation of the force of heart contraction by cardiac conduction	0	0	0	0	0	0
regulation of thyroid-stimulating hormone secretion	0	0	0	0	0	0
regulation of transforming growth factor beta receptor signaling pathway	0	0	0	0	0	0
regulation of translation	0	0	0	0	0	0
regulation of triglyceride biosynthetic process	0	0	0	0	0	0
regulation of tumor necrosis factor-mediated signaling pathway	0	0	0	0	0	0
regulation of vascular permeability involved in acute inflammatory response	0	0	0	0	0	0
regulation of vascular wound healing	0	0	0	0	0	0
regulation of vasoconstriction by circulating norepinephrine	0	0	0	0	0	0
regulation of vitamin D receptor signaling pathway	0	0	0	0	0	0
regulation of water loss via skin	0	0	0	0	0	0
removal of superoxide radicals	0	0	0	0	0	0
renal vesicle induction	0	0	0	0	0	0
renal water absorption	0	0	0	0	0	0
renal water homeostasis	0	0	0	0	0	0
renin secretion into blood stream	0	0	0	0	0	0
response to L-ascorbic acid	0	0	0	0	0	0
response to biotin	0	0	0	0	0	0
response to cobalamin	0	0	0	0	0	0
response to estradiol	0	0	0	0	0	0
response to folic acid	0	0	0	0	0	0
response to fructose	0	0	0	0	0	0
response to genistein	0	0	0	0	0	0
response to glucocorticoid	0	0	0	0	0	0
response to glucose	0	0	0	0	0	0
response to growth hormone	0	0	0	0	0	0
response to host immune response	0	0	0	0	0	0
response to insulin	0	0	0	0	0	0
response to mineralocorticoid	0	0	0	0	0	0
response to morphine	0	0	0	0	0	0
response to norepinephrine	0	0	0	0	0	0
response to prostaglandin F	0	0	0	0	0	0
response to vitamin A	0	0	0	0	0	0
response to vitamin B1	0	0	0	0	0	0
response to vitamin B2	0	0	0	0	0	0
response to vitamin B3	0	0	0	0	0	0
response to vitamin E	0	0	0	0	0	0
response to vitamin K	0	0	0	0	0	0
retinal cell apoptotic process	0	0	0	0	0	0
retinol transport	0	0	0	0	0	0
reverse cholesterol transport	0	0	0	0	0	0
rhodopsin mediated signaling pathway	0	0	0	0	0	0
rhythmic excitation	0	0	0	0	0	0
riboflavin biosynthetic process	0	0	0	0	0	0
ribonucleoside monophosphate biosynthetic process	0	0	0	0	0	0
ribosomal small subunit assembly	0	0	0	0	0	0
ribosomal subunit export from nucleus	0	0	0	0	0	0
ribosome assembly	0	0	0	0	0	0
right ventricular cardiac muscle tissue morphogenesis	0	0	0	0	0	0
sebaceous gland cell differentiation	0	0	0	0	0	0
secondary heart field specification	0	0	0	0	0	0
secretion of lysosomal enzymes	0	0	0	0	0	0
secretory columnal luminar epithelial cell differentiation involved in prostate glandular acinus development	0	0	0	0	0	0
sensory perception of sound	0	0	0	0	0	0
sensory perception of taste	0	0	0	0	0	0
sensory perception of touch	0	0	0	0	0	0
serotonin receptor signaling pathway	0	0	0	0	0	0
serotonin secretion	0	0	0	0	0	0
signal peptide processing	0	0	0	0	0	0
skeletal muscle acetylcholine-gated channel clustering	0	0	0	0	0	0
skeletal muscle adaptation	0	0	0	0	0	0
skeletal muscle contraction	0	0	0	0	0	0
slit diaphragm assembly	0	0	0	0	0	0
smooth muscle hyperplasia	0	0	0	0	0	0
smooth muscle hypertrophy	0	0	0	0	0	0
smoothened signaling pathway involved in dorsal/ventral neural tube patterning	0	0	0	0	0	0
smoothened signaling pathway involved in regulation of cerebellar granule cell precursor cell proliferation	0	0	0	0	0	0
smoothened signaling pathway involved in ventral spinal cord patterning	0	0	0	0	0	0
sodium ion transport	0	0	0	0	0	0
sodium-dependent organic cation transport	0	0	0	0	0	0
sodium-independent organic anion transport	0	0	0	0	0	0
somatostatin signaling pathway	0	0	0	0	0	0
sorbitol catabolic process	0	0	0	0	0	0
sperm axoneme assembly	0	0	0	0	0	0
sphingoid catabolic process	0	0	0	0	0	0
sphingolipid biosynthetic process	0	0	0	0	0	0
spinal cord association neuron differentiation	0	0	0	0	0	0
spinal cord motor neuron differentiation	0	0	0	0	0	0
spindle assembly	0	0	0	0	0	0
splicing factor protein import into nucleus	0	0	0	0	0	0
squamous basal epithelial stem cell differentiation involved in prostate gland acinus development	0	0	0	0	0	0
starch catabolic process	0	0	0	0	0	0
steroid hormone mediated signaling pathway	0	0	0	0	0	0
steroid hormone receptor complex assembly	0	0	0	0	0	0
sterol regulatory element binding protein import into nucleus	0	0	0	0	0	0
stress granule assembly	0	0	0	0	0	0
sucrose metabolic process	0	0	0	0	0	0
surfactant homeostasis	0	0	0	0	0	0
synaptic transmission involved in micturition	0	0	0	0	0	0
synaptic transmission, GABAergic	0	0	0	0	0	0
synaptic transmission, glutamatergic	0	0	0	0	0	0
synaptic transmission, glycinergic	0	0	0	0	0	0
synaptic vesicle priming	0	0	0	0	0	0
telomere formation via telomerase	0	0	0	0	0	0
termination of signal transduction	0	0	0	0	0	0
thermoception	0	0	0	0	0	0
thrombin receptor signaling pathway	0	0	0	0	0	0
thyroid hormone mediated signaling pathway	0	0	0	0	0	0
transcription, DNA-templated	0	0	0	0	0	0
transformation of host cell by virus	0	0	0	0	0	0
transformed cell apoptotic process	0	0	0	0	0	0
transforming growth factor beta receptor complex assembly	0	0	0	0	0	0
translational frameshifting	0	0	0	0	0	0
translational termination	0	0	0	0	0	0
transmembrane receptor protein serine/threonine kinase signaling pathway	0	0	0	0	0	0
transmembrane receptor protein tyrosine kinase signaling pathway	0	0	0	0	0	0
trehalose biosynthetic process	0	0	0	0	0	0
triglyceride metabolic process	0	0	0	0	0	0
triglyceride-rich lipoprotein particle remodeling	0	0	0	0	0	0
trophectodermal cellular morphogenesis	0	0	0	0	0	0
tumor necrosis factor-mediated signaling pathway	0	0	0	0	0	0
type B pancreatic cell apoptotic process	0	0	0	0	0	0
type B pancreatic cell development	0	0	0	0	0	0
type I interferon signaling pathway	0	0	0	0	0	0
ubiquinone biosynthetic process	0	0	0	0	0	0
ureter smooth muscle cell differentiation	0	0	0	0	0	0
uridine transport	0	0	0	0	0	0
vascular smooth muscle cell differentiation	0	0	0	0	0	0
vasoconstriction	0	0	0	0	0	0
vasodilation	0	0	0	0	0	0
ventral spinal cord interneuron differentiation	0	0	0	0	0	0
ventricular cardiac muscle cell action potential	0	0	0	0	0	0
ventricular compact myocardium morphogenesis	0	0	0	0	0	0
very-low-density lipoprotein particle assembly	0	0	0	0	0	0
viral penetration into host nucleus	0	0	0	0	0	0
viral transcription	0	0	0	0	0	0
visual perception	0	0	0	0	0	0
vitamin E biosynthetic process	0	0	0	0	0	0
wound healing, spreading of epidermal cells	0	0	0	0	0	0
zygotic determination of anterior/posterior axis, embryo	0	0	0	0	0	0
zymogen activation	0	0	0	0	0	0
