# Supplementary material for: Network stratification analysis for identifying function-specific network layers
Source: Royal Society of Chemistry journal article supplement (doi:10.1039/c5mb00782h), 2016-02-08
Supplement: c5mb00782h1.zip [file Supplementary_Table_S3.xlsx]

## Sheet: normal
GO terms	diseae enrichment ratio	Significance Strength (SS) score	GO term type
immune response-inhibiting cell surface receptor signaling pathway	0.0454545	1	independent GO term
DNA ligation	0.25	1	independent GO term
ATP synthesis coupled proton transport	0.285714	1	independent GO term
phosphatidylinositol-3-phosphate biosynthetic process	0.173913	1	independent GO term
mitochondrial ATP synthesis coupled proton transport	0.285714	1	dependent GO term
vesicle fusion with Golgi apparatus	0	1	independent GO term
DNA strand elongation involved in DNA replication	0.148148	1	independent GO term
COPI coating of Golgi vesicle	0.12	1	independent GO term
cellular response to calcium ion	0.177419	0.999935	independent GO term
telomere maintenance	0.21519	0.999925	independent GO term
negative regulation of epidermal growth factor receptor signaling pathway	0.136364	0.999896	independent GO term
spliceosomal snRNP assembly	0.122449	0.999801	independent GO term
transcription-coupled nucleotide-excision repair	0.129412	0.999664	independent GO term
regulation of fatty acid beta-oxidation	0.347826	0.998031	dependent GO term
DNA deamination	0	0.998031	independent GO term
positive regulation of actin filament polymerization	0.121739	0.99701	independent GO term
intermediate filament bundle assembly	0.25	0.996932	independent GO term
telomere maintenance via recombination	0.166667	0.996731	dependent GO term
telomere maintenance via semi-conservative replication	0.186047	0.996731	dependent GO term
mitotic recombination	0.145455	0.994706	independent GO term
SCF-dependent proteasomal ubiquitin-dependent protein catabolic process	0.0588235	0.993582	independent GO term
nucleotide-excision repair, DNA gap filling	0.153846	0.991393	independent GO term
regulation of mRNA processing	0.208333	0.98921	independent GO term
telomere maintenance via telomere lengthening	0.176471	0.989138	dependent GO term
protein localization to Golgi apparatus	0.210526	0.989067	independent GO term
regulation of translation in response to stress	0.181818	0.989067	independent GO term
clathrin coat assembly	0.238095	0.989067	independent GO term
regulation of dendritic spine morphogenesis	0.205882	0.989067	independent GO term
regulation of fatty acid oxidation	0.25	0.980886	independent GO term
regulation of mitotic recombination	0.222222	0.978885	independent GO term
protein targeting to Golgi	0.0869565	0.978885	independent GO term
DNA double-strand break processing	0.142857	0.978885	dependent GO term
DNA catabolic process, exonucleolytic	0.15	0.978885	independent GO term
plasma kallikrein-kinin cascade	0.5	0.978885	independent GO term
leukocyte migration involved in inflammatory response	0.25	0.978885	independent GO term
Factor XII activation	0.428571	0.978885	dependent GO term
positive regulation of T cell tolerance induction	0.333333	0.978885	independent GO term
transcription from mitochondrial promoter	0	0.978885	independent GO term
transcription initiation from mitochondrial promoter	0	0.978885	independent GO term
tRNA modification	0.153846	0.978885	independent GO term
glutamate metabolic process	0.1	0.978885	independent GO term
glutamate catabolic process	0.1	0.978885	dependent GO term
S-adenosylmethionine biosynthetic process	0.5	0.978885	independent GO term
polyamine biosynthetic process	0	0.978885	independent GO term
phosphatidylcholine biosynthetic process	0.103448	0.978885	dependent GO term
mitotic G2 DNA damage checkpoint	0.473684	0.978885	independent GO term
positive regulation of autophagy	0.212766	0.978885	independent GO term
positive regulation of norepinephrine secretion	0	0.978885	independent GO term
positive regulation of receptor biosynthetic process	0.171429	0.978885	independent GO term
positive regulation of cholesterol esterification	0.230769	0.978885	independent GO term
positive regulation of heparan sulfate proteoglycan biosynthetic process	0.4	0.978885	dependent GO term
positive regulation of protein processing	0.296296	0.978885	independent GO term
smooth muscle cell migration	0.191489	0.978885	independent GO term
heparan sulfate proteoglycan biosynthetic process	0	0.978885	independent GO term
heparan sulfate proteoglycan biosynthetic process, polysaccharide chain biosynthetic process	0	0.978885	independent GO term
telomere capping	0.5	0.978885	dependent GO term
protein import into peroxisome matrix, docking	0	0.978885	independent GO term
histone phosphorylation	0.145833	0.978885	independent GO term
lipoxygenase pathway	0	0.978885	independent GO term
termination of signal transduction	0.173333	0.978885	independent GO term
regulation of myelination	0.242424	0.978885	independent GO term
protection from non-homologous end joining at telomere	0.5	0.978885	dependent GO term
positive regulation of fatty acid beta-oxidation	0.333333	0.978885	dependent GO term
negative regulation of cholesterol transport	0.36	0.978885	independent GO term
fatty acid beta-oxidation using acyl-CoA oxidase	0.333333	0.978885	independent GO term
phospholipid efflux	0.269231	0.978885	independent GO term
negative regulation of protein dephosphorylation	0.111111	0.978885	independent GO term
cellular response to interferon-alpha	0.1875	0.978885	independent GO term
cargo loading into vesicle	0.1	0.978885	independent GO term
purinergic nucleotide receptor signaling pathway	0	0.978885	independent GO term
cellular response to potassium ion	0	0.978885	independent GO term
alpha-linolenic acid metabolic process	0.333333	0.978885	independent GO term
opioid receptor signaling pathway	0	0.978885	independent GO term
interleukin-8-mediated signaling pathway	0	0.978885	independent GO term
type I interferon biosynthetic process	0.266667	0.978885	independent GO term
negative regulation of T-helper 1 cell differentiation	0.363636	0.978885	independent GO term
negative regulation of mitotic recombination	0.4	0.978885	dependent GO term
skeletal muscle fiber development	0.114286	0.978885	independent GO term
regulation of B cell receptor signaling pathway	0.0333333	0.978885	independent GO term
DNA ligation involved in DNA repair	0.384615	0.978885	dependent GO term
positive regulation of fibrinolysis	0.388889	0.978885	independent GO term
synaptic transmission involved in micturition	0	0.978885	independent GO term
long-term synaptic potentiation	0.245614	0.978885	independent GO term
negative regulation of pathway-restricted SMAD protein phosphorylation	0.3	0.978885	dependent GO term
negative regulation of gastric acid secretion	0	0.978885	independent GO term
positive regulation of mRNA catabolic process	0.2	0.978885	independent GO term
nucleotide-binding oligomerization domain containing 2 signaling pathway	0.133333	0.978885	independent GO term
neutrophil aggregation	0.25	0.978885	independent GO term
regulation of bile acid biosynthetic process	0.1	0.978885	independent GO term
protein localization to chromatin	0	0.978885	independent GO term
cellular response to lithium ion	0.309524	0.978885	independent GO term
cellular response to gamma radiation	0.151515	0.978885	independent GO term
DNA demethylation	0.1	0.978885	independent GO term
positive regulation of protein targeting to membrane	0.285714	0.978885	independent GO term
cellular response to thyroid hormone stimulus	0.181818	0.978885	independent GO term
N-methyl-D-aspartate receptor clustering	0	0.978885	independent GO term
negative regulation of dendritic cell differentiation	0	0.978885	independent GO term
regulation of glucose import in response to insulin stimulus	0.24	0.978885	independent GO term
positive regulation of glucose import in response to insulin stimulus	0.285714	0.978885	dependent GO term
lipoxin metabolic process	0	0.978885	independent GO term
carnitine transport	0.25	0.97562	independent GO term
Arp2/3 complex-mediated actin nucleation	0.25	0.97562	dependent GO term
regulation of defense response to virus by virus	0.0909091	0.971686	independent GO term
positive regulation of protein insertion into mitochondrial membrane involved in apoptotic signaling pathway	0.0943396	0.971164	independent GO term
DNA biosynthetic process	0.15	0.969847	independent GO term
transcription elongation from RNA polymerase III promoter	0.176471	0.969501	independent GO term
termination of RNA polymerase III transcription	0.176471	0.969501	independent GO term
DNA replication checkpoint	0.142857	0.94279	independent GO term
pro-B cell differentiation	0.176471	0.94279	independent GO term
carnitine shuttle	0	0.94279	dependent GO term
positive regulation of sodium ion transport	0.111111	0.94279	independent GO term
rRNA catabolic process	0.115385	0.94279	independent GO term
mRNA modification	0.0666667	0.94279	independent GO term
zymogen activation	0.44	0.94279	independent GO term
negative regulation of histone acetylation	0.172414	0.94279	dependent GO term
mast cell degranulation	0.0625	0.94279	independent GO term
negative regulation of DNA recombination	0.470588	0.94279	independent GO term
Tie signaling pathway	1	0.94279	independent GO term
negative regulation of peptidyl-lysine acetylation	0.147059	0.94279	independent GO term
anterograde axon cargo transport	0.176471	0.93708	independent GO term
negative regulation of fibrinolysis	0.263158	0.93708	independent GO term
double-strand break repair via nonhomologous end joining	0.192308	0.916133	independent GO term
DNA synthesis involved in DNA repair	0.15	0.896513	dependent GO term
skeletal muscle contraction	0.266667	0.896513	independent GO term
attachment of GPI anchor to protein	0.5	0.896513	independent GO term
positive regulation of cytokinesis	0.129032	0.896513	independent GO term
nucleotide-excision repair, DNA incision	0	0.896513	independent GO term
interleukin-4-mediated signaling pathway	0.181818	0.896513	independent GO term
enucleate erythrocyte differentiation	0.166667	0.896513	independent GO term
isotype switching	0.294118	0.896513	independent GO term
positive regulation of fatty acid oxidation	0.238095	0.896513	dependent GO term
regulation of mRNA splicing, via spliceosome	0.190476	0.896513	dependent GO term
positive regulation of membrane protein ectodomain proteolysis	0.15	0.896513	dependent GO term
ventricular cardiac muscle cell development	0.184211	0.896513	dependent GO term
protein localization to chromosome, telomeric region	0.1	0.896513	independent GO term
double-strand break repair via homologous recombination	0.119048	0.878219	independent GO term
viral protein processing	0.206897	0.869025	independent GO term
pyrimidine nucleoside metabolic process	0.2	0.843774	independent GO term
RNA-dependent DNA replication	0.178571	0.843774	independent GO term
telomere maintenance via telomerase	0.157895	0.843774	dependent GO term
negative regulation of platelet activation	0.322581	0.843774	independent GO term
regulation of glycoprotein biosynthetic process	0.272727	0.843774	independent GO term
RNA polyadenylation	0.210526	0.843774	independent GO term
negative regulation of JNK cascade	0.227273	0.843774	dependent GO term
regulation of T cell receptor signaling pathway	0.264706	0.843774	independent GO term
mammary gland branching involved in pregnancy	0.217391	0.843774	independent GO term
Notch signaling involved in heart development	0.0588235	0.843774	independent GO term
cellular response to indole-3-methanol	0.333333	0.843774	independent GO term
regulation of platelet aggregation	0.125	0.843774	independent GO term
protein export from nucleus	0.207317	0.832219	independent GO term
regulation of mast cell degranulation	0.1	0.832219	independent GO term
JAK-STAT cascade involved in growth hormone signaling pathway	0.173469	0.818024	independent GO term
postreplication repair	0.173913	0.787429	independent GO term
chromosome condensation	0.222222	0.787429	dependent GO term
negative regulation of stress-activated MAPK cascade	0.22973	0.787429	independent GO term
negative regulation of protein catabolic process	0.194175	0.787429	independent GO term
positive regulation of mast cell degranulation	0.111111	0.787429	dependent GO term
negative regulation of blood vessel endothelial cell migration	0.3	0.787429	dependent GO term
positive regulation of proteasomal ubiquitin-dependent protein catabolic process	0.184466	0.773613	dependent GO term
positive regulation of phosphatidylinositol 3-kinase activity	0.205882	0.739951	dependent GO term
regulation of proteasomal ubiquitin-dependent protein catabolic process	0.185484	0.736128	independent GO term
autophagic vacuole fusion	0	0.730471	independent GO term
inactivation of MAPK activity	0.177419	0.730471	independent GO term
MAPK import into nucleus	0.2	0.730471	independent GO term
mRNA 3'-splice site recognition	0	0.730471	independent GO term
DNA strand renaturation	0.210526	0.730471	independent GO term
prostaglandin biosynthetic process	0.153846	0.730471	independent GO term
natural killer cell differentiation	0.206897	0.730471	independent GO term
histamine secretion	0.102564	0.730471	independent GO term
norepinephrine-epinephrine vasoconstriction involved in regulation of systemic arterial blood pressure	0	0.730471	independent GO term
positive regulation of heart rate by epinephrine-norepinephrine	0	0.730471	independent GO term
positive regulation of the force of heart contraction by epinephrine-norepinephrine	0	0.730471	dependent GO term
vasodilation by norepinephrine-epinephrine involved in regulation of systemic arterial blood pressure	0	0.730471	independent GO term
desensitization of G-protein coupled receptor protein signaling pathway by arrestin	0	0.730471	independent GO term
regulation of blood vessel size by renin-angiotensin	0	0.730471	independent GO term
pre-B cell differentiation	0	0.730471	independent GO term
serotonin secretion by platelet	0	0.730471	independent GO term
regulation of germinal center formation	0.1	0.730471	independent GO term
positive regulation of acute inflammatory response to antigenic stimulus	0.333333	0.730471	dependent GO term
renal sodium ion transport	0.266667	0.730471	independent GO term
regulation of systemic arterial blood pressure by endothelin	0	0.730471	independent GO term
negative regulation of glomerular filtration	0	0.730471	independent GO term
regulation of secondary heart field cardioblast proliferation	0.272727	0.730471	independent GO term
growth plate cartilage development	0.3	0.730471	independent GO term
regulation of glycogen catabolic process	0.208333	0.730471	independent GO term
acetyl-CoA biosynthetic process	0	0.730471	independent GO term
acetyl-CoA biosynthetic process from pyruvate	0	0.730471	dependent GO term
isocitrate metabolic process	0	0.730471	independent GO term
DNA topological change	0.258065	0.730471	independent GO term
DNA replication, synthesis of RNA primer	0.0909091	0.730471	independent GO term
nucleotide-excision repair, DNA incision, 3'-to lesion	0	0.730471	dependent GO term
nucleotide-excision repair, DNA incision, 5'-to lesion	0	0.730471	dependent GO term
DNA replication-dependent nucleosome assembly	0	0.730471	independent GO term
methylation-dependent chromatin silencing	0.0454545	0.730471	independent GO term
arginine catabolic process	0.214286	0.730471	independent GO term
glutamate decarboxylation to succinate	0	0.730471	dependent GO term
ribosomal protein import into nucleus	0	0.730471	independent GO term
platelet activating factor biosynthetic process	0.5	0.730471	dependent GO term
sphingosine metabolic process	0	0.730471	independent GO term
sphingomyelin metabolic process	0	0.730471	independent GO term
sphingomyelin biosynthetic process	0	0.730471	dependent GO term
ganglioside catabolic process	0	0.730471	independent GO term
biotin metabolic process	0	0.730471	independent GO term
Mo-molybdopterin cofactor biosynthetic process	0	0.730471	independent GO term
negative regulation of transcription from RNA polymerase II promoter during mitosis	0.133333	0.730471	independent GO term
common-partner SMAD protein phosphorylation	0.206897	0.730471	independent GO term
adenylate cyclase-activating dopamine receptor signaling pathway	0.2	0.730471	dependent GO term
adenylate cyclase-inhibiting dopamine receptor signaling pathway	0	0.730471	dependent GO term
G-protein coupled acetylcholine receptor signaling pathway	0.0869565	0.730471	independent GO term
cytoplasmic sequestering of NF-kappaB	0.16	0.730471	dependent GO term
JUN phosphorylation	0.2	0.730471	independent GO term
fusion of sperm to egg plasma membrane	0.333333	0.730471	independent GO term
dosage compensation	0.181818	0.730471	independent GO term
sensory perception of smell	0.259259	0.730471	independent GO term
retrograde axon cargo transport	0.166667	0.730471	independent GO term
attachment of spindle microtubules to kinetochore	0.0416667	0.730471	independent GO term
hormone-mediated apoptotic signaling pathway	0.5	0.730471	independent GO term
branched-chain amino acid catabolic process	0	0.730471	independent GO term
mRNA transcription	0.1875	0.730471	independent GO term
gamma-aminobutyric acid metabolic process	0	0.730471	independent GO term
auditory receptor cell fate commitment	0	0.730471	independent GO term
proteasomal ubiquitin-independent protein catabolic process	0	0.730471	independent GO term
positive regulation of cytoplasmic mRNA processing body assembly	0.375	0.730471	independent GO term
positive regulation of platelet-derived growth factor receptor signaling pathway	0	0.730471	independent GO term
regulation of definitive erythrocyte differentiation	0.285714	0.730471	independent GO term
negative regulation of macrophage derived foam cell differentiation	0.205128	0.730471	independent GO term
negative regulation of plasma membrane long-chain fatty acid transport	0.4	0.730471	independent GO term
positive regulation of fibroblast migration	0.4375	0.730471	independent GO term
negative regulation of keratinocyte proliferation	0.285714	0.730471	independent GO term
positive regulation of circadian sleep/wake cycle, wakefulness	0.5	0.730471	independent GO term
negative regulation of receptor biosynthetic process	0.263158	0.730471	independent GO term
negative regulation of steroid biosynthetic process	0.244898	0.730471	independent GO term
negative regulation of macrophage cytokine production	0.428571	0.730471	independent GO term
positive regulation of glutamate secretion	0.166667	0.730471	independent GO term
tonic smooth muscle contraction	0.333333	0.730471	independent GO term
skeletal myofibril assembly	0	0.730471	independent GO term
cardiac muscle hypertrophy in response to stress	0.263158	0.730471	dependent GO term
negative regulation of smooth muscle cell migration	0.25	0.730471	dependent GO term
bile acid and bile salt transport	0.333333	0.730471	independent GO term
L-glutamate transport	0.227273	0.730471	independent GO term
cytidine to uridine editing	0.111111	0.730471	independent GO term
nucleosome positioning	0	0.730471	independent GO term
Rac protein signal transduction	0.130435	0.730471	independent GO term
keratan sulfate biosynthetic process	0.142857	0.730471	independent GO term
peptidyl-arginine methylation	0.222222	0.730471	independent GO term
protein prenylation	0.0769231	0.730471	independent GO term
protein farnesylation	0.166667	0.730471	dependent GO term
peptide cross-linking via chondroitin 4-sulfate glycosaminoglycan	0.428571	0.730471	independent GO term
L-ascorbic acid metabolic process	0.5	0.730471	independent GO term
translesion synthesis	0.206897	0.730471	dependent GO term
visceral motor neuron differentiation	0	0.730471	independent GO term
spinal cord oligodendrocyte cell fate specification	0	0.730471	independent GO term
oligodendrocyte cell fate commitment	0	0.730471	independent GO term
convergent extension involved in neural plate elongation	0.2	0.730471	independent GO term
intestinal cholesterol absorption	0	0.730471	independent GO term
targeting of mRNA for destruction involved in RNA interference	0	0.730471	independent GO term
primary miRNA processing	0.0714286	0.730471	independent GO term
pre-miRNA processing	0	0.730471	independent GO term
intra-S DNA damage checkpoint	0.5	0.730471	independent GO term
positive regulation of synaptic plasticity	0.5	0.730471	independent GO term
regulation of synaptic transmission, cholinergic	0	0.730471	independent GO term
purine nucleotide salvage	0	0.730471	independent GO term
positive regulation of prostaglandin secretion	0.266667	0.730471	independent GO term
regulation of ARF GTPase activity	0.2	0.730471	independent GO term
negative regulation of chondrocyte differentiation	0.12766	0.730471	independent GO term
negative regulation of proteasomal ubiquitin-dependent protein catabolic process	0.2	0.730471	dependent GO term
positive regulation of interleukin-1 alpha production	0.307692	0.730471	independent GO term
negative regulation of epinephrine secretion	0.5	0.730471	independent GO term
regulation of natural killer cell proliferation	0.2	0.730471	dependent GO term
negative regulation of peptidyl-serine phosphorylation	0.2	0.730471	independent GO term
negative regulation of intracellular estrogen receptor signaling pathway	0.133333	0.730471	dependent GO term
positive regulation of NAD(P)H oxidase activity	0	0.730471	independent GO term
negative regulation of heterotypic cell-cell adhesion	0.238095	0.730471	independent GO term
negative regulation of toll-like receptor signaling pathway	0.09375	0.730471	independent GO term
positive regulation of toll-like receptor 4 signaling pathway	0.25	0.730471	independent GO term
low-density lipoprotein particle remodeling	0.257143	0.730471	independent GO term
high-density lipoprotein particle assembly	0.222222	0.730471	independent GO term
cellular response to interferon-beta	0.25	0.730471	independent GO term
enteroendocrine cell differentiation	0.1	0.730471	independent GO term
cellular response to interleukin-3	0.111111	0.730471	independent GO term
cellular response to erythropoietin	0.25	0.730471	independent GO term
phosphatidylglycerol acyl-chain remodeling	0.2	0.730471	independent GO term
phosphatidylinositol acyl-chain remodeling	0.133333	0.730471	independent GO term
phosphatidylserine acyl-chain remodeling	0.133333	0.730471	independent GO term
phosphatidylcholine acyl-chain remodeling	0.133333	0.730471	dependent GO term
phosphatidylethanolamine acyl-chain remodeling	0.133333	0.730471	dependent GO term
protein localization to M-band	0	0.730471	independent GO term
interleukin-7-mediated signaling pathway	0	0.730471	independent GO term
interleukin-23-mediated signaling pathway	1	0.730471	independent GO term
interleukin-3-mediated signaling pathway	0	0.730471	independent GO term
prolactin signaling pathway	0.1875	0.730471	independent GO term
erythropoietin-mediated signaling pathway	0.3	0.730471	dependent GO term
oncostatin-M-mediated signaling pathway	0.285714	0.730471	independent GO term
MDA-5 signaling pathway	0.0625	0.730471	independent GO term
cellular response to glucose starvation	0.173913	0.730471	independent GO term
heme catabolic process	0.125	0.730471	independent GO term
negative regulation of NF-kappaB import into nucleus	0.170213	0.730471	independent GO term
positive regulation of odontogenesis	0.3	0.730471	independent GO term
detection of triacyl bacterial lipopeptide	0.5	0.730471	independent GO term
detection of diacyl bacterial lipopeptide	0.5	0.730471	independent GO term
negative regulation of tyrosine phosphorylation of Stat3 protein	0.241379	0.730471	dependent GO term
mRNA transcription from RNA polymerase II promoter	0.181818	0.730471	dependent GO term
glucocorticoid receptor signaling pathway	0.16129	0.730471	independent GO term
regulation of amyloid precursor protein biosynthetic process	0.230769	0.730471	dependent GO term
Golgi to plasma membrane protein transport	0.137255	0.730471	independent GO term
positive regulation of macrophage activation	0.3125	0.730471	independent GO term
natural killer cell degranulation	0	0.730471	independent GO term
maintenance of DNA repeat elements	0.555556	0.730471	independent GO term
regulation of DNA methylation	0.222222	0.730471	independent GO term
negative regulation of interferon-gamma biosynthetic process	0	0.730471	independent GO term
cellular extravasation	0.2	0.730471	independent GO term
negative regulation of interleukin-6 biosynthetic process	0	0.730471	independent GO term
positive regulation of interleukin-6 biosynthetic process	0	0.730471	independent GO term
negative regulation of B cell differentiation	0.25	0.730471	independent GO term
positive regulation of keratinocyte differentiation	0.24	0.730471	independent GO term
positive regulation of T-helper 2 cell differentiation	0.176471	0.730471	independent GO term
negative regulation of low-density lipoprotein particle receptor biosynthetic process	0.2	0.730471	dependent GO term
positive regulation of fatty acid biosynthetic process	0.190476	0.730471	independent GO term
negative regulation of glucose import	0.1875	0.730471	dependent GO term
negative regulation of JAK-STAT cascade	0.217391	0.730471	independent GO term
platelet activating factor metabolic process	0.111111	0.730471	independent GO term
positive regulation of insulin receptor signaling pathway	0.181818	0.730471	independent GO term
positive regulation of protein export from nucleus	0.236842	0.730471	independent GO term
regulation of RNA export from nucleus	0.333333	0.730471	independent GO term
negative regulation of RNA export from nucleus	0.375	0.730471	dependent GO term
positive regulation of saliva secretion	0	0.730471	independent GO term
mitochondrion transport along microtubule	0.285714	0.730471	independent GO term
positive regulation of retinoic acid receptor signaling pathway	0.285714	0.730471	independent GO term
negative regulation of oligodendrocyte differentiation	0.25	0.730471	independent GO term
sarcomerogenesis	0	0.730471	independent GO term
3'-phosphoadenosine 5'-phosphosulfate metabolic process	0	0.730471	independent GO term
negative regulation of lipoprotein metabolic process	0.294118	0.730471	independent GO term
negative regulation of dendrite morphogenesis	0.105263	0.730471	independent GO term
positive regulation of antigen receptor-mediated signaling pathway	0	0.730471	independent GO term
positive regulation of T cell receptor signaling pathway	0	0.730471	dependent GO term
negative regulation of negative chemotaxis	0	0.730471	independent GO term
positive regulation of helicase activity	0.5	0.730471	independent GO term
negative regulation of helicase activity	0.16	0.730471	independent GO term
negative regulation of neurotrophin TRK receptor signaling pathway	0.5	0.730471	independent GO term
negative regulation of histone H3-K9 methylation	0.25	0.730471	dependent GO term
negative regulation of telomerase activity	0.0769231	0.730471	independent GO term
regulation of attachment of spindle microtubules to kinetochore	0.333333	0.730471	independent GO term
phospholipid homeostasis	0.193548	0.730471	independent GO term
Bergmann glial cell differentiation	0.166667	0.730471	independent GO term
phospholipase C-activating dopamine receptor signaling pathway	0.181818	0.730471	dependent GO term
lens induction in camera-type eye	0.15625	0.730471	independent GO term
positive regulation of transcription initiation from RNA polymerase II promoter	0.125	0.730471	independent GO term
regulation of ventricular cardiac muscle cell membrane repolarization	0.142857	0.730471	independent GO term
cardiac muscle cell myoblast differentiation	0.5	0.730471	independent GO term
positive regulation of cardiac muscle contraction	0.25	0.730471	independent GO term
regulation of calcidiol 1-monooxygenase activity	0.235294	0.730471	independent GO term
negative regulation of mitotic anaphase-promoting complex activity	0.375	0.730471	dependent GO term
branch elongation involved in salivary gland morphogenesis	0	0.730471	independent GO term
branch elongation involved in mammary gland duct branching	1	0.730471	independent GO term
positive regulation of mast cell chemotaxis	0.5	0.730471	independent GO term
mesenchymal cell differentiation involved in lung development	0	0.730471	independent GO term
neuroendocrine cell differentiation	0.1875	0.730471	independent GO term
positive regulation of dermatome development	0	0.730471	independent GO term
negative regulation of transcription from RNA polymerase II promoter in response to hypoxia	0	0.730471	independent GO term
chaperone cofactor-dependent protein refolding	0.222222	0.730471	independent GO term
regulation of centromeric sister chromatid cohesion	0.5	0.730471	independent GO term
caveola assembly	0.2	0.730471	independent GO term
CUT catabolic process	0.157895	0.730471	independent GO term
cellular response to bacterial lipopeptide	0.285714	0.730471	independent GO term
cellular response to peptidoglycan	0.5	0.730471	independent GO term
cellular response to epidermal growth factor stimulus	0.136364	0.730471	independent GO term
cellular response to prostaglandin E stimulus	0.25	0.730471	dependent GO term
cellular response to cholesterol	0.5	0.730471	independent GO term
cellular response to diacyl bacterial lipopeptide	0.5	0.730471	dependent GO term
cellular response to triacyl bacterial lipopeptide	0.5	0.730471	dependent GO term
transcriptional activation by promoter-enhancer looping	0	0.730471	independent GO term
cellular response to catecholamine stimulus	0.318182	0.730471	independent GO term
glomerular visceral epithelial cell differentiation	0	0.730471	independent GO term
metanephric distal tubule development	0	0.730471	independent GO term
minus-end-directed organelle transport along microtubule	0	0.730471	independent GO term
negative regulation of establishment of protein localization to plasma membrane	0.0909091	0.730471	independent GO term
negative regulation of cell migration involved in sprouting angiogenesis	0.117647	0.730471	dependent GO term
positive regulation of chemokine secretion	0.181818	0.730471	independent GO term
regulation of arachidonic acid secretion	0.25	0.730471	independent GO term
positive regulation of arachidonic acid secretion	0.5	0.730471	dependent GO term
mature dendritic cell differentiation	0.166667	0.730471	independent GO term
semaphorin-plexin signaling pathway involved in bone trabecula morphogenesis	0	0.730471	independent GO term
negative regulation of hydrogen peroxide-mediated programmed cell death	0.636364	0.730471	independent GO term
negative regulation of proteasomal protein catabolic process	0.16129	0.730471	dependent GO term
negative regulation of intrinsic apoptotic signaling pathway in response to DNA damage by p53 class mediator	0.147059	0.730471	independent GO term
positive regulation of protein ubiquitination involved in ubiquitin-dependent protein catabolic process	0.135135	0.730471	independent GO term
regulation of smooth muscle cell-matrix adhesion	0.5	0.730471	independent GO term
regulation of DNA biosynthetic process	0.276596	0.730471	independent GO term
positive regulation of chemokine (C-X-C motif) ligand 2 production	0.0909091	0.730471	independent GO term
positive regulation of dendritic cell chemotaxis	0.166667	0.730471	independent GO term
positive regulation of DNA biosynthetic process	0.470588	0.730471	dependent GO term
negative regulation of dendritic cell apoptotic process	0.142857	0.730471	independent GO term
DNA recombinase assembly	0.111111	0.729639	independent GO term
pyrimidine nucleobase metabolic process	0.18	0.729639	independent GO term
negative regulation of telomere maintenance	0.333333	0.729639	dependent GO term
phosphatidylcholine metabolic process	0.166667	0.729639	independent GO term
negative regulation of endothelial cell migration	0.311111	0.672013	dependent GO term
negative regulation of insulin receptor signaling pathway	0.114286	0.667127	independent GO term
COPI-coated vesicle budding	0	0.624689	independent GO term
pathway-restricted SMAD protein phosphorylation	0.1	0.624689	independent GO term
single strand break repair	0.153846	0.624312	independent GO term
chromatin silencing at rDNA	0	0.624312	independent GO term
meiotic mismatch repair	0.5	0.624312	independent GO term
regulation of the force of heart contraction by chemical signal	0.294118	0.624312	independent GO term
ventricular trabecula myocardium morphogenesis	0.181818	0.624312	independent GO term
citrate metabolic process	0.2	0.624312	independent GO term
peptidyl-lysine modification to hypusine	0.111111	0.624312	independent GO term
potassium ion import	0.25	0.624312	independent GO term
negative regulation of glucose transport	0.157895	0.624312	independent GO term
negative regulation of myotube differentiation	0.212121	0.624312	dependent GO term
regulation of ARF protein signal transduction	0	0.624312	independent GO term
positive regulation of telomere maintenance	0.1	0.624312	dependent GO term
sequestering of TGFbeta in extracellular matrix	0.571429	0.624312	dependent GO term
interleukin-2-mediated signaling pathway	0.222222	0.624312	independent GO term
mitochondrial ATP synthesis coupled electron transport	0.25	0.624312	independent GO term
negative regulation of DNA damage response, signal transduction by p53 class mediator	0.268293	0.624312	independent GO term
positive regulation of calcium ion-dependent exocytosis	0.2	0.624312	independent GO term
pyrimidine nucleoside biosynthetic process	0.266667	0.624312	dependent GO term
positive regulation of follicle-stimulating hormone secretion	0	0.624312	independent GO term
progesterone receptor signaling pathway	0.172414	0.624312	independent GO term
cellular response to prostaglandin stimulus	0.233333	0.624312	dependent GO term
cellular response to fatty acid	0.275	0.624312	independent GO term
positive regulation of endoplasmic reticulum unfolded protein response	0.5	0.624312	independent GO term
extracellular negative regulation of signal transduction	0.333333	0.624312	independent GO term
negative regulation of epithelial cell migration	0.295455	0.615724	independent GO term
regulation of phosphatidylinositol 3-kinase activity	0.194444	0.614656	dependent GO term
positive regulation of proteolysis	0.176829	0.614656	dependent GO term
mitotic nuclear envelope disassembly	0.157895	0.565241	independent GO term
histone lysine methylation	0.138889	0.5616	independent GO term
regulation of lipid kinase activity	0.2	0.553635	independent GO term
succinate metabolic process	0.25	0.533578	independent GO term
transmembrane receptor protein tyrosine phosphatase signaling pathway	0.0666667	0.533578	independent GO term
positive regulation of pseudopodium assembly	0.0909091	0.533578	independent GO term
negative regulation of telomere maintenance via telomerase	0.5	0.533578	dependent GO term
melanosome localization	0	0.533578	independent GO term
positive regulation of natural killer cell differentiation	0.0909091	0.533578	dependent GO term
substrate adhesion-dependent cell spreading	0.25	0.533578	independent GO term
positive regulation of B cell differentiation	0.0967742	0.533578	independent GO term
negative regulation of striated muscle cell differentiation	0.203125	0.533578	independent GO term
nuclear pore complex assembly	0.2	0.533578	independent GO term
positive regulation of T-helper 17 cell lineage commitment	1	0.533578	independent GO term
complement activation, alternative pathway	0.166667	0.461878	independent GO term
intracellular estrogen receptor signaling pathway	0.20339	0.461878	independent GO term
regulation of telomere maintenance	0.190476	0.461878	independent GO term
regulation of mitochondrial membrane potential	0.232558	0.461878	independent GO term
cardiac muscle hypertrophy	0.183673	0.456029	independent GO term
pyrimidine nucleobase catabolic process	0.0833333	0.456029	dependent GO term
regulation of gene expression by genetic imprinting	0.25	0.456029	independent GO term
N-terminal protein amino acid acetylation	0.235294	0.456029	independent GO term
nitric oxide mediated signal transduction	0.2	0.456029	independent GO term
olfactory bulb interneuron differentiation	1	0.456029	dependent GO term
positive regulation of transforming growth factor beta receptor signaling pathway	0.215385	0.456029	independent GO term
regulation of microtubule polymerization	0.466667	0.456029	independent GO term
negative regulation of growth of symbiont in host	0.25	0.456029	independent GO term
negative regulation of follicle-stimulating hormone secretion	0	0.456029	independent GO term
leukemia inhibitory factor signaling pathway	0.3	0.456029	independent GO term
histone H3-K4 methylation	0.285714	0.456029	dependent GO term
positive regulation of SMAD protein import into nucleus	0.136364	0.456029	independent GO term
histone mRNA catabolic process	0.0851064	0.456029	independent GO term
tumor necrosis factor-mediated signaling pathway	0.149425	0.433928	independent GO term
bicarbonate transport	0.230769	0.416822	independent GO term
macroautophagy	0.222222	0.389749	independent GO term
forebrain neuron differentiation	0.375	0.389749	independent GO term
regulation of natural killer cell activation	0.230769	0.389749	independent GO term
positive regulation of interleukin-2 biosynthetic process	0.190476	0.389749	independent GO term
negative regulation of anoikis	0.206897	0.389749	independent GO term
positive regulation of protein catabolic process	0.202186	0.384469	independent GO term
neural crest cell development	0.4	0.375105	independent GO term
cardiac muscle cell development	0.2	0.336707	independent GO term
positive regulation of acute inflammatory response	0.275	0.333101	independent GO term
myotube differentiation	0.265306	0.333101	independent GO term
C-terminal protein lipidation	0.5	0.301546	independent GO term
ventricular cardiac muscle cell differentiation	0.285714	0.284685	independent GO term
positive regulation of extrinsic apoptotic signaling pathway	0.197531	0.243305	independent GO term
dopamine receptor signaling pathway	0.147541	0.177713	independent GO term
T cell homeostasis	0.277778	0.177713	independent GO term
positive regulation of epithelial to mesenchymal transition	0.20339	0.149714	independent GO term
protein localization to endoplasmic reticulum	0.2	0.129801	independent GO term
neural crest cell differentiation	0.214286	0.0810217	independent GO term
DNA packaging	0.244898	0.0566984	independent GO term
growth hormone receptor signaling pathway	0.257143	0.0519429	independent GO term
cell morphogenesis involved in neuron differentiation	0.142857	1.06316e-40	independent GO term

## Sheet: cirrhotic
GO terms	diseae enrichment ratio	Significance Strength (SS) score	GO term type
ATP hydrolysis coupled proton transport	0.1875	1	independent GO term
base conversion or substitution editing	0	1	independent GO term
myeloid dendritic cell differentiation	0.16	1	independent GO term
positive regulation of saliva secretion	0.25	1	independent GO term
phospholipid homeostasis	0.2	1	independent GO term
complement activation, alternative pathway	0.166667	1	independent GO term
negative regulation of blood coagulation	0.289474	0.999569	independent GO term
dendritic cell chemotaxis	0.352941	0.999362	dependent GO term
dendritic cell migration	0.368421	0.999362	independent GO term
transferrin transport	0.125	0.99869	independent GO term
positive regulation of membrane potential	0.133333	0.998483	independent GO term
patterning of blood vessels	0.270833	0.998396	independent GO term
pro-B cell differentiation	0.266667	0.997762	independent GO term
regulation of the force of heart contraction by chemical signal	0.136364	0.997762	independent GO term
sequestering of TGFbeta in extracellular matrix	0.2	0.997762	independent GO term
intermediate filament bundle assembly	0.166667	0.997762	independent GO term
tachykinin receptor signaling pathway	0.181818	0.994561	independent GO term
regulation of mRNA splicing, via spliceosome	0.102564	0.991927	dependent GO term
autophagic vacuole fusion	0.111111	0.982889	independent GO term
synaptic transmission, dopaminergic	0.107143	0.982889	independent GO term
positive regulation of heart rate by epinephrine-norepinephrine	0	0.982889	independent GO term
positive regulation of the force of heart contraction by epinephrine-norepinephrine	0	0.982889	dependent GO term
macrophage activation involved in immune response	0.181818	0.982889	independent GO term
plasma kallikrein-kinin cascade	0.5	0.982889	independent GO term
myeloid dendritic cell chemotaxis	0	0.982889	dependent GO term
leukocyte migration involved in inflammatory response	0.130435	0.982889	independent GO term
Factor XII activation	0.5	0.982889	dependent GO term
positive regulation of the force of heart contraction by chemical signal	0.1	0.982889	dependent GO term
transcription initiation from mitochondrial promoter	0	0.982889	independent GO term
glutamate catabolic process	0	0.982889	independent GO term
glutamate decarboxylation to succinate	0	0.982889	dependent GO term
ribosomal protein import into nucleus	0	0.982889	independent GO term
cholesterol catabolic process	0.1	0.982889	independent GO term
biotin metabolic process	0	0.982889	independent GO term
common-partner SMAD protein phosphorylation	0.209302	0.982889	independent GO term
adenylate cyclase-inhibiting dopamine receptor signaling pathway	0.0714286	0.982889	independent GO term
gamma-aminobutyric acid catabolic process	0	0.982889	independent GO term
negative regulation of autophagy	0.136364	0.982889	independent GO term
positive regulation of platelet-derived growth factor receptor signaling pathway	0	0.982889	independent GO term
negative regulation of intestinal phytosterol absorption	0	0.982889	independent GO term
positive regulation of protein processing	0.15	0.982889	independent GO term
cardiac muscle hypertrophy in response to stress	0.222222	0.982889	independent GO term
cytidine to uridine editing	0	0.982889	dependent GO term
short-chain fatty acid catabolic process	0	0.982889	independent GO term
translesion synthesis	0.142857	0.982889	dependent GO term
visceral motor neuron differentiation	0	0.982889	independent GO term
spinal cord oligodendrocyte cell fate specification	0	0.982889	independent GO term
protection from non-homologous end joining at telomere	0.2	0.982889	independent GO term
regulation of synaptic transmission, cholinergic	0.333333	0.982889	independent GO term
positive regulation of synaptic transmission, cholinergic	0.2	0.982889	dependent GO term
positive regulation of synaptic transmission, GABAergic	0.285714	0.982889	independent GO term
positive regulation of RNA splicing	0.166667	0.982889	dependent GO term
response to vitamin D	0.52	0.982889	independent GO term
phospholipid efflux	0.285714	0.982889	independent GO term
mitochondrial protein catabolic process	0	0.982889	independent GO term
enteroendocrine cell differentiation	0.0666667	0.982889	independent GO term
interleukin-7-mediated signaling pathway	0	0.982889	independent GO term
positive regulation of macrophage activation	0.289474	0.982889	independent GO term
negative regulation by host of viral transcription	0.15625	0.982889	independent GO term
positive regulation of interleukin-8 biosynthetic process	0.285714	0.982889	independent GO term
negative regulation of intestinal cholesterol absorption	0	0.982889	independent GO term
negative regulation of striated muscle contraction	0.1	0.982889	independent GO term
lymphocyte chemotaxis	0.30303	0.982889	independent GO term
positive regulation of nitric-oxide synthase activity	0.226415	0.982889	dependent GO term
positive regulation of fibrinolysis	0.444444	0.982889	dependent GO term
positive regulation of growth hormone secretion	0	0.982889	independent GO term
Clara cell differentiation	0	0.982889	independent GO term
DNA cytosine deamination	0	0.982889	independent GO term
nucleotide-binding oligomerization domain containing 2 signaling pathway	0.368421	0.982889	dependent GO term
neutrophil aggregation	0.2	0.982889	independent GO term
protein localization to chromatin	0.2	0.982889	independent GO term
cellular response to lithium ion	0.333333	0.982889	independent GO term
cellular response to epidermal growth factor stimulus	0.2	0.982889	independent GO term
interleukin-12 secretion	0	0.982889	independent GO term
positive regulation of chemokine secretion	0.105263	0.982889	independent GO term
mature dendritic cell differentiation	0.142857	0.982889	independent GO term
synaptic vesicle clustering	0	0.982889	independent GO term
N-methyl-D-aspartate receptor clustering	0.0833333	0.982889	independent GO term
postsynaptic density protein 95 clustering	0	0.982889	independent GO term
positive regulation of natural killer cell chemotaxis	0.210526	0.982889	dependent GO term
positive regulation of dendritic cell chemotaxis	0.2	0.982889	independent GO term
positive regulation of gastrulation	0.142857	0.982889	independent GO term
positive regulation of glucose import in response to insulin stimulus	0.4	0.982889	independent GO term
regulation of RNA splicing	0.0666667	0.978656	independent GO term
regulation of interleukin-1 beta secretion	0.268293	0.968053	independent GO term
postreplication repair	0.1875	0.967085	independent GO term
embryonic camera-type eye development	0.25	0.967085	independent GO term
fibrinolysis	0.263158	0.963061	dependent GO term
ventricular trabecula myocardium morphogenesis	0.272727	0.953141	independent GO term
I-kappaB phosphorylation	0.25	0.953141	independent GO term
mRNA modification	0	0.953141	independent GO term
zymogen activation	0.307692	0.953141	independent GO term
interleukin-2-mediated signaling pathway	0.307692	0.953141	independent GO term
negative regulation of DNA damage response, signal transduction by p53 class mediator	0.296296	0.953141	independent GO term
positive regulation of calcium ion-dependent exocytosis	0	0.953141	independent GO term
negative regulation of calcium ion transport	0.185185	0.953141	independent GO term
positive regulation of synaptic transmission, glutamatergic	0.105263	0.953141	independent GO term
spindle assembly involved in mitosis	0.275862	0.953141	independent GO term
regulation of alpha-amino-3-hydroxy-5-methyl-4-isoxazole propionate selective glutamate receptor activity	0.0384615	0.953141	independent GO term
regulation of lymphocyte migration	0.279412	0.953141	independent GO term
positive regulation of pseudopodium assembly	0.192308	0.914356	independent GO term
interleukin-4-mediated signaling pathway	0.0833333	0.914356	independent GO term
positive regulation of fatty acid oxidation	0.346154	0.914356	independent GO term
cardiac epithelial to mesenchymal transition	0.219512	0.914356	independent GO term
nucleotide-binding oligomerization domain containing signaling pathway	0.258065	0.898717	independent GO term
nucleosome disassembly	0.162162	0.897574	independent GO term
interleukin-1-mediated signaling pathway	0.181818	0.897574	independent GO term
negative regulation of endothelial cell proliferation	0.20339	0.869405	independent GO term
angiotensin maturation	0.222222	0.869405	independent GO term
negative regulation of adenylate cyclase activity	0.125	0.869405	independent GO term
nitric oxide mediated signal transduction	0.157895	0.869405	independent GO term
negative regulation of platelet activation	0.242424	0.869405	dependent GO term
regulation of fatty acid beta-oxidation	0.2	0.869405	independent GO term
regulation of follicle-stimulating hormone secretion	0.545455	0.869405	independent GO term
negative regulation of follicle-stimulating hormone secretion	0.428571	0.869405	dependent GO term
mammary gland branching involved in pregnancy	0.2	0.869405	independent GO term
signal complex assembly	0.136364	0.867369	independent GO term
SMAD protein complex assembly	0.186667	0.867369	independent GO term
negative regulation of fibrinolysis	0.333333	0.83455	dependent GO term
regulation of nitric-oxide synthase activity	0.211765	0.826225	independent GO term
positive regulation of positive chemotaxis	0.193548	0.820566	independent GO term
negative regulation of anoikis	0.222222	0.820566	independent GO term
DNA recombinase assembly	0.125	0.769623	independent GO term
positive regulation of defense response to virus by host	0.107143	0.769623	independent GO term
phosphatidylcholine metabolic process	0.185185	0.769623	independent GO term
sensory perception of taste	0.117647	0.769623	independent GO term
MAPK import into nucleus	0.4375	0.755467	independent GO term
regulation of transcription from RNA polymerase II promoter by glucose	0.272727	0.755467	dependent GO term
DNA double-strand break processing	0.15	0.755467	dependent GO term
DNA strand renaturation	0.166667	0.755467	independent GO term
DNA catabolic process, exonucleolytic	0.125	0.755467	independent GO term
prostaglandin biosynthetic process	0.230769	0.755467	dependent GO term
ganglioside metabolic process	0.142857	0.755467	independent GO term
eye photoreceptor cell differentiation	0.307692	0.755467	independent GO term
natural killer cell differentiation	0.125	0.755467	independent GO term
norepinephrine-epinephrine vasoconstriction involved in regulation of systemic arterial blood pressure	0	0.755467	independent GO term
vasodilation by norepinephrine-epinephrine involved in regulation of systemic arterial blood pressure	0	0.755467	independent GO term
desensitization of G-protein coupled receptor protein signaling pathway by arrestin	0.142857	0.755467	dependent GO term
regulation of blood vessel size by renin-angiotensin	0.428571	0.755467	independent GO term
regulation of receptor internalization	0.0666667	0.755467	independent GO term
immature B cell differentiation	0	0.755467	independent GO term
mast cell chemotaxis	0	0.755467	independent GO term
serotonin secretion by platelet	0	0.755467	independent GO term
positive regulation of T cell tolerance induction	0.28	0.755467	independent GO term
immune response-inhibiting cell surface receptor signaling pathway	0	0.755467	independent GO term
positive regulation of inflammatory response to antigenic stimulus	0.172414	0.755467	independent GO term
regulation of systemic arterial blood pressure by endothelin	0.25	0.755467	independent GO term
regulation of glycogen catabolic process	0.0666667	0.755467	independent GO term
acetyl-CoA biosynthetic process from pyruvate	0	0.755467	independent GO term
isocitrate metabolic process	0	0.755467	independent GO term
purine ribonucleoside salvage	0	0.755467	independent GO term
adenine salvage	0	0.755467	independent GO term
guanine salvage	0	0.755467	independent GO term
DNA topological change	0.047619	0.755467	independent GO term
DNA replication, synthesis of RNA primer	0	0.755467	independent GO term
nucleotide-excision repair, DNA incision, 3'-to lesion	0	0.755467	dependent GO term
methylation-dependent chromatin silencing	0.1	0.755467	independent GO term
transcription initiation from RNA polymerase III promoter	0	0.755467	independent GO term
tRNA modification	0	0.755467	independent GO term
arginine catabolic process	0	0.755467	independent GO term
protein retention in ER lumen	0.272727	0.755467	independent GO term
phosphatidic acid biosynthetic process	0.178571	0.755467	dependent GO term
phosphatidylcholine biosynthetic process	0.142857	0.755467	dependent GO term
platelet activating factor biosynthetic process	0	0.755467	dependent GO term
sphingosine metabolic process	0	0.755467	independent GO term
prostaglandin metabolic process	0.193548	0.755467	independent GO term
post-chaperonin tubulin folding pathway	0	0.755467	independent GO term
negative regulation of transcription from RNA polymerase II promoter during mitosis	0.294118	0.755467	independent GO term
adenylate cyclase-activating dopamine receptor signaling pathway	0.26087	0.755467	independent GO term
G-protein coupled receptor signaling pathway coupled to cGMP nucleotide second messenger	0.3125	0.755467	independent GO term
phospholipase C-activating G-protein coupled glutamate receptor signaling pathway	0	0.755467	independent GO term
cytoplasmic sequestering of NF-kappaB	0.470588	0.755467	independent GO term
JUN phosphorylation	0.125	0.755467	independent GO term
STAT protein import into nucleus	0.2	0.755467	independent GO term
fusion of sperm to egg plasma membrane	0.375	0.755467	independent GO term
cyclin catabolic process	0.571429	0.755467	independent GO term
retrograde axon cargo transport	0.2	0.755467	independent GO term
attachment of spindle microtubules to kinetochore	0.230769	0.755467	independent GO term
snRNA transcription	0.2	0.755467	independent GO term
auditory receptor cell fate commitment	0	0.755467	independent GO term
proteasomal ubiquitin-independent protein catabolic process	0.5	0.755467	independent GO term
regulation of definitive erythrocyte differentiation	0.125	0.755467	independent GO term
negative regulation of plasma membrane long-chain fatty acid transport	0.315789	0.755467	independent GO term
negative regulation of keratinocyte proliferation	0.125	0.755467	independent GO term
positive regulation of circadian sleep/wake cycle, wakefulness	0	0.755467	independent GO term
positive regulation of receptor biosynthetic process	0.228571	0.755467	independent GO term
positive regulation of cholesterol esterification	0.230769	0.755467	independent GO term
positive regulation of heparan sulfate proteoglycan biosynthetic process	0.181818	0.755467	independent GO term
tonic smooth muscle contraction	0.454545	0.755467	independent GO term
skeletal myofibril assembly	0	0.755467	independent GO term
telomere capping	0.333333	0.755467	independent GO term
protein import into peroxisome matrix, docking	0	0.755467	independent GO term
histone phosphorylation	0.0740741	0.755467	independent GO term
Rac protein signal transduction	0.16	0.755467	independent GO term
peptidyl-arginine methylation	0.047619	0.755467	independent GO term
protein prenylation	0.1875	0.755467	independent GO term
protein farnesylation	0.5	0.755467	dependent GO term
peptidyl-proline hydroxylation to 4-hydroxy-L-proline	0.142857	0.755467	independent GO term
L-ascorbic acid metabolic process	0.5	0.755467	independent GO term
oligodendrocyte cell fate commitment	0	0.755467	independent GO term
forebrain neuroblast division	0.153846	0.755467	independent GO term
convergent extension involved in neural plate elongation	0.285714	0.755467	independent GO term
sphingolipid biosynthetic process	0.117647	0.755467	independent GO term
maintenance of gastrointestinal epithelium	0.411765	0.755467	independent GO term
post-embryonic camera-type eye development	0.1875	0.755467	independent GO term
replication fork processing	0.111111	0.755467	independent GO term
intra-S DNA damage checkpoint	0.3	0.755467	independent GO term
regulation of myelination	0.171429	0.755467	independent GO term
positive regulation of cyclin-dependent protein serine/threonine kinase activity involved in G1/S transition of mitotic cell cycle	0.289474	0.755467	independent GO term
positive regulation of lipopolysaccharide-mediated signaling pathway	0.0869565	0.755467	independent GO term
positive regulation of synaptic plasticity	0.5	0.755467	independent GO term
positive regulation of fatty acid beta-oxidation	0.368421	0.755467	dependent GO term
GMP salvage	0	0.755467	independent GO term
IMP salvage	0	0.755467	independent GO term
peripheral nervous system myelin maintenance	0.166667	0.755467	independent GO term
positive regulation of prostaglandin secretion	0.4	0.755467	independent GO term
negative regulation of chondrocyte differentiation	0.153846	0.755467	independent GO term
regulation of phospholipase A2 activity	0.190476	0.755467	independent GO term
positive regulation of phosphoprotein phosphatase activity	0.263158	0.755467	dependent GO term
negative regulation of interleukin-1 beta production	0.2	0.755467	independent GO term
regulation of myeloid cell apoptotic process	0.175439	0.755467	independent GO term
fatty acid beta-oxidation using acyl-CoA oxidase	0.5	0.755467	independent GO term
positive regulation of NAD(P)H oxidase activity	0.333333	0.755467	independent GO term
negative regulation of heterotypic cell-cell adhesion	0.190476	0.755467	independent GO term
positive regulation of toll-like receptor signaling pathway	0.216216	0.755467	independent GO term
positive regulation of toll-like receptor 4 signaling pathway	0.185185	0.755467	dependent GO term
low-density lipoprotein particle remodeling	0.444444	0.755467	independent GO term
histone arginine methylation	0.047619	0.755467	independent GO term
negative regulation of protein dephosphorylation	0.0714286	0.755467	independent GO term
cellular response to interferon-beta	0.272727	0.755467	independent GO term
endothelial cell chemotaxis	0.176471	0.755467	independent GO term
vascular smooth muscle cell differentiation	0.263158	0.755467	independent GO term
cellular response to interleukin-3	0	0.755467	independent GO term
cellular response to erythropoietin	0	0.755467	independent GO term
phosphatidylinositol-3-phosphate biosynthetic process	0.0454545	0.755467	independent GO term
alpha-linolenic acid metabolic process	0.5	0.755467	independent GO term
phosphatidylglycerol acyl-chain remodeling	0.1	0.755467	independent GO term
phosphatidylinositol acyl-chain remodeling	0.1	0.755467	independent GO term
phosphatidylserine acyl-chain remodeling	0.1	0.755467	independent GO term
phosphatidylcholine acyl-chain remodeling	0.1	0.755467	dependent GO term
phosphatidylethanolamine acyl-chain remodeling	0.1	0.755467	dependent GO term
protein localization to M-band	0	0.755467	independent GO term
opioid receptor signaling pathway	0	0.755467	independent GO term
interleukin-5-mediated signaling pathway	0	0.755467	independent GO term
interleukin-3-mediated signaling pathway	0	0.755467	independent GO term
prolactin signaling pathway	0.285714	0.755467	independent GO term
erythropoietin-mediated signaling pathway	0	0.755467	dependent GO term
oncostatin-M-mediated signaling pathway	0.222222	0.755467	independent GO term
MDA-5 signaling pathway	0.111111	0.755467	independent GO term
cellular response to glucose starvation	0.172414	0.755467	independent GO term
heme catabolic process	0.5	0.755467	independent GO term
eye photoreceptor cell development	0.258065	0.755467	independent GO term
negative regulation of tyrosine phosphorylation of Stat3 protein	0.388889	0.755467	dependent GO term
negative regulation of tumor necrosis factor biosynthetic process	0.375	0.755467	independent GO term
glucocorticoid receptor signaling pathway	0.230769	0.755467	independent GO term
surfactant homeostasis	0.25	0.755467	independent GO term
natural killer cell degranulation	0	0.755467	independent GO term
maintenance of DNA repeat elements	1	0.755467	independent GO term
regulation of transcription from RNA polymerase II promoter in response to oxidative stress	0.222222	0.755467	independent GO term
regulation of phosphoprotein phosphatase activity	0.224138	0.755467	independent GO term
regulation of DNA methylation	0.259259	0.755467	independent GO term
negative regulation of interferon-gamma biosynthetic process	0.428571	0.755467	independent GO term
positive regulation of interleukin-12 biosynthetic process	0.266667	0.755467	independent GO term
cellular extravasation	0.2	0.755467	independent GO term
negative regulation of interleukin-6 biosynthetic process	0.222222	0.755467	independent GO term
negative regulation of B cell differentiation	0.5	0.755467	independent GO term
regulation of auditory receptor cell differentiation	0	0.755467	independent GO term
regulation of keratinocyte differentiation	0.314286	0.755467	independent GO term
positive regulation of keratinocyte differentiation	0.333333	0.755467	dependent GO term
negative regulation of T-helper 1 cell differentiation	0	0.755467	independent GO term
negative regulation of macrophage differentiation	0.178571	0.755467	dependent GO term
regulation of myoblast differentiation	0.234043	0.755467	dependent GO term
negative regulation of low-density lipoprotein particle receptor biosynthetic process	0.4	0.755467	independent GO term
negative regulation of gluconeogenesis	0.5	0.755467	independent GO term
negative regulation of mitotic recombination	0	0.755467	independent GO term
carbon catabolite regulation of transcription	0.117647	0.755467	independent GO term
GMP catabolic process	0	0.755467	independent GO term
negative regulation of glucose import	0.181818	0.755467	dependent GO term
negative regulation of JAK-STAT cascade	0.272727	0.755467	independent GO term
platelet activating factor metabolic process	0	0.755467	independent GO term
phosphatidic acid metabolic process	0.178571	0.755467	independent GO term
negative regulation of alpha-beta T cell proliferation	0.375	0.755467	independent GO term
regulation of RNA export from nucleus	0.190476	0.755467	independent GO term
negative regulation of RNA export from nucleus	0.25	0.755467	dependent GO term
positive regulation of hormone biosynthetic process	0.230769	0.755467	independent GO term
macrophage chemotaxis	0.228571	0.755467	independent GO term
vesicle fusion with Golgi apparatus	0	0.755467	independent GO term
positive regulation of retinoic acid receptor signaling pathway	0.176471	0.755467	independent GO term
negative regulation of oligodendrocyte differentiation	0.142857	0.755467	independent GO term
cardiac muscle fiber development	0	0.755467	dependent GO term
sarcomerogenesis	0	0.755467	independent GO term
negative regulation of dendrite morphogenesis	0.153846	0.755467	dependent GO term
positive regulation of dendrite morphogenesis	0.173913	0.755467	independent GO term
regulation of B cell receptor signaling pathway	0	0.755467	independent GO term
negative regulation of negative chemotaxis	0.5	0.755467	independent GO term
induction of positive chemotaxis	0.176471	0.755467	dependent GO term
negative regulation of lipid catabolic process	0.222222	0.755467	independent GO term
positive regulation of helicase activity	0	0.755467	independent GO term
positive regulation of striated muscle cell differentiation	0.227273	0.755467	independent GO term
negative regulation of neurotrophin TRK receptor signaling pathway	0.384615	0.755467	independent GO term
negative regulation of histone H3-K9 methylation	0.181818	0.755467	independent GO term
positive regulation of telomerase activity	0	0.755467	independent GO term
negative regulation of telomerase activity	0.142857	0.755467	independent GO term
regulation of attachment of spindle microtubules to kinetochore	0.166667	0.755467	independent GO term
Bergmann glial cell differentiation	0.0666667	0.755467	independent GO term
positive regulation of transcription initiation from RNA polymerase II promoter	0.15	0.755467	independent GO term
long-term synaptic potentiation	0.127273	0.755467	independent GO term
positive regulation of type I interferon-mediated signaling pathway	0.15	0.755467	dependent GO term
positive regulation of epithelial cell proliferation involved in lung morphogenesis	0.416667	0.755467	independent GO term
positive regulation of vitamin D biosynthetic process	0.5	0.755467	independent GO term
regulation of calcidiol 1-monooxygenase activity	0.285714	0.755467	independent GO term
positive regulation of calcidiol 1-monooxygenase activity	0.5	0.755467	dependent GO term
regulation of branching involved in salivary gland morphogenesis by mesenchymal-epithelial signaling	0.428571	0.755467	independent GO term
branch elongation involved in salivary gland morphogenesis	0.333333	0.755467	independent GO term
branch elongation involved in mammary gland duct branching	0.4	0.755467	independent GO term
mesenchymal cell differentiation involved in lung development	0.333333	0.755467	independent GO term
neuroendocrine cell differentiation	0.411765	0.755467	independent GO term
BMP signaling pathway involved in heart development	0.1875	0.755467	independent GO term
chaperone cofactor-dependent protein refolding	0.125	0.755467	independent GO term
regulation of centromeric sister chromatid cohesion	0.352941	0.755467	independent GO term
caveola assembly	0.4	0.755467	independent GO term
regulation of bile acid biosynthetic process	0.375	0.755467	independent GO term
CUT catabolic process	0	0.755467	independent GO term
cellular response to peptidoglycan	0.363636	0.755467	independent GO term
cellular response to gonadotropin stimulus	0.133333	0.755467	independent GO term
cellular response to cholesterol	0.4	0.755467	independent GO term
potassium ion export	0	0.755467	independent GO term
cellular response to gamma radiation	0.0689655	0.755467	independent GO term
cellular response to diacyl bacterial lipopeptide	0.5	0.755467	independent GO term
transcriptional activation by promoter-enhancer looping	0.125	0.755467	independent GO term
positive regulation of fever generation by positive regulation of prostaglandin secretion	0.444444	0.755467	dependent GO term
TNFSF11-mediated signaling pathway	0.444444	0.755467	independent GO term
mitotic cell cycle arrest	0.357143	0.755467	independent GO term
glomerular visceral epithelial cell development	0.333333	0.755467	independent GO term
glomerular visceral epithelial cell differentiation	0	0.755467	independent GO term
mesonephric tubule development	0.0555556	0.755467	independent GO term
metanephric distal tubule development	0	0.755467	independent GO term
minus-end-directed organelle transport along microtubule	0	0.755467	independent GO term
DNA demethylation	0.142857	0.755467	independent GO term
positive regulation of monocyte chemotaxis	0.4	0.755467	independent GO term
positive regulation of steroid hormone biosynthetic process	0	0.755467	dependent GO term
negative regulation of cell migration involved in sprouting angiogenesis	0.222222	0.755467	dependent GO term
positive regulation of synapse maturation	0.133333	0.755467	independent GO term
regulation of arachidonic acid secretion	0	0.755467	independent GO term
negative regulation of calcium ion import	0.5	0.755467	dependent GO term
positive regulation of protein targeting to membrane	0.157895	0.755467	independent GO term
gephyrin clustering	0	0.755467	independent GO term
semaphorin-plexin signaling pathway involved in bone trabecula morphogenesis	0.125	0.755467	independent GO term
negative regulation of hydrogen peroxide-mediated programmed cell death	0.833333	0.755467	independent GO term
regulation of smooth muscle cell-matrix adhesion	1	0.755467	independent GO term
positive regulation of chemokine (C-X-C motif) ligand 2 production	0.294118	0.755467	independent GO term
regulation of skeletal muscle cell differentiation	0.166667	0.755467	independent GO term
negative regulation of dendritic cell differentiation	0	0.755467	independent GO term
positive regulation of vasculogenesis	0.5	0.755467	independent GO term
spliceosomal complex assembly	0.0882353	0.666647	independent GO term
viral protein processing	0.275862	0.666647	independent GO term
meiotic mismatch repair	0	0.65663	dependent GO term
positive regulation of cytokine-mediated signaling pathway	0.22	0.65663	independent GO term
citrate metabolic process	0.4	0.65663	independent GO term
pyrimidine ribonucleotide biosynthetic process	0.111111	0.65663	independent GO term
negative regulation of glucose transport	0.179487	0.65663	independent GO term
negative regulation of myotube differentiation	0.166667	0.65663	dependent GO term
negative regulation of axon extension	0.148148	0.65663	dependent GO term
positive regulation of intracellular estrogen receptor signaling pathway	0.181818	0.65663	dependent GO term
mitochondrial ATP synthesis coupled electron transport	0.111111	0.65663	independent GO term
mast cell degranulation	0	0.65663	independent GO term
positive regulation of macrophage differentiation	0.205128	0.65663	independent GO term
positive regulation of axon extension	0.178571	0.65663	dependent GO term
pyrimidine nucleoside biosynthetic process	0.0952381	0.65663	independent GO term
phosphatidylinositol phosphorylation	0.166667	0.65663	independent GO term
positive regulation of follicle-stimulating hormone secretion	0.545455	0.65663	dependent GO term
Tie signaling pathway	0.5	0.65663	independent GO term
negative regulation of axon extension involved in axon guidance	0.2	0.65663	dependent GO term
progesterone receptor signaling pathway	0.44	0.65663	independent GO term
positive regulation of lipid catabolic process	0.294118	0.65663	independent GO term
positive regulation of cardioblast differentiation	0.142857	0.65663	independent GO term
cardiac myofibril assembly	0.191489	0.65663	independent GO term
negative regulation of cell cycle arrest	0.178571	0.65663	independent GO term
positive regulation of endoplasmic reticulum unfolded protein response	0.5	0.65663	independent GO term
regulation of blood volume by renin-angiotensin	0.269231	0.570721	independent GO term
desensitization of G-protein coupled receptor protein signaling pathway	0.153846	0.570721	independent GO term
DNA damage induced protein phosphorylation	0.111111	0.570721	independent GO term
transmembrane receptor protein tyrosine phosphatase signaling pathway	0.2	0.570721	independent GO term
vascular smooth muscle contraction	0.214286	0.570721	independent GO term
attachment of GPI anchor to protein	0.25	0.570721	independent GO term
macrophage differentiation	0.210526	0.570721	independent GO term
positive regulation of chondrocyte differentiation	0.205882	0.570721	independent GO term
melanosome localization	0	0.570721	independent GO term
positive regulation of natural killer cell differentiation	0.6	0.570721	independent GO term
positive regulation of intracellular steroid hormone receptor signaling pathway	0.15	0.570721	independent GO term
nucleotide-excision repair, DNA incision	0.25	0.570721	independent GO term
protein localization to Golgi apparatus	0.125	0.570721	independent GO term
5S class rRNA transcription from RNA polymerase III type 1 promoter	0	0.570721	independent GO term
tRNA transcription from RNA polymerase III promoter	0	0.570721	independent GO term
negative regulation of endocytosis	0.142857	0.570721	independent GO term
positive regulation of membrane protein ectodomain proteolysis	0.125	0.570721	dependent GO term
ventricular cardiac muscle cell development	0.153846	0.570721	dependent GO term
regulation of dendritic spine morphogenesis	0.030303	0.570721	independent GO term
T cell homeostasis	0.217391	0.568003	independent GO term
complement activation, lectin pathway	0.75	0.49605	independent GO term
mitotic nuclear envelope reassembly	0.0833333	0.49605	independent GO term
carnitine transport	0	0.49605	independent GO term
olfactory bulb interneuron differentiation	0.25	0.49605	independent GO term
negative regulation of growth of symbiont in host	0.25641	0.49605	independent GO term
leukemia inhibitory factor signaling pathway	0.222222	0.49605	independent GO term
histone H3-K4 methylation	0.125	0.49605	independent GO term
regulation of axon extension	0.142857	0.431147	independent GO term
negative regulation of blood vessel endothelial cell migration	0.355556	0.431147	independent GO term
positive regulation by host of viral transcription	0.191489	0.431147	independent GO term
eosinophil chemotaxis	0.210526	0.431147	independent GO term
regulation of Rac protein signal transduction	0.0571429	0.374734	independent GO term
neural crest cell differentiation	0.205882	0.361572	independent GO term
regulation of systemic arterial blood pressure by circulatory renin-angiotensin	0.5	0.325701	independent GO term
dendrite morphogenesis	0.203125	0.283083	independent GO term
JAK-STAT cascade involved in growth hormone signaling pathway	0.280899	0.282159	independent GO term
mismatch repair	0.333333	0.242773	independent GO term
mitotic spindle assembly checkpoint	0.25	0.213942	dependent GO term
spindle assembly checkpoint	0.25	0.213942	independent GO term
mitotic spindle checkpoint	0.202899	0.197776	independent GO term
protein localization to endoplasmic reticulum	0	0.161538	independent GO term
cardiac muscle cell development	0.157895	0.122024	independent GO term
C-terminal protein lipidation	0.25	0.106054	independent GO term
GPI anchor biosynthetic process	0	0.0921736	independent GO term
regulation of myotube differentiation	0.195652	0.0801097	independent GO term
growth hormone receptor signaling pathway	0.266667	0.00142637	independent GO term
protein localization to nucleus	0.177419	8.06166e-05	independent GO term
mitotic G1 DNA damage checkpoint	0.21875	3.08507e-05	independent GO term
cell morphogenesis involved in neuron differentiation	0.210526	1.59449e-37	independent GO term

## Sheet: dysplastic
GO terms	diseae enrichment ratio	Significance Strength (SS) score	GO term type
acetyl-CoA biosynthetic process	0	1	independent GO term
adenylate cyclase-inhibiting dopamine receptor signaling pathway	0	1	independent GO term
regulation of interleukin-6 biosynthetic process	0.181818	1	independent GO term
glomerular visceral epithelial cell development	0.0714286	1	independent GO term
cellular response to thyroid hormone stimulus	0.115385	1	independent GO term
regulation of SMAD protein import into nucleus	0.149254	0.999894	independent GO term
positive regulation of SMAD protein import into nucleus	0.15625	0.999894	dependent GO term
negative regulation of endothelial cell proliferation	0.152941	0.997125	independent GO term
histone mRNA catabolic process	0.0294118	0.997125	independent GO term
cellular response to indole-3-methanol	0.217391	0.997125	independent GO term
positive regulation of calcium-mediated signaling	0.132075	0.992475	independent GO term
negative regulation of anoikis	0.162162	0.992475	independent GO term
membrane protein intracellular domain proteolysis	0.2	0.986905	independent GO term
negative regulation of peptide secretion	0.0701754	0.985515	independent GO term
spinal cord motor neuron differentiation	0.0555556	0.985515	independent GO term
protein localization to chromosome, telomeric region	0.181818	0.985515	independent GO term
membrane protein ectodomain proteolysis	0.169231	0.979122	independent GO term
activation of MAPKKK activity	0.4375	0.974314	independent GO term
mRNA 3'-splice site recognition	0	0.974314	independent GO term
regulation of blood vessel size by renin-angiotensin	0.375	0.974314	dependent GO term
regulation of receptor internalization	0.166667	0.974314	independent GO term
plasma kallikrein-kinin cascade	0.5	0.974314	independent GO term
Factor XII activation	0.5	0.974314	independent GO term
acetyl-CoA biosynthetic process from pyruvate	0	0.974314	dependent GO term
DNA ligation	0.181818	0.974314	independent GO term
glutamate catabolic process	0.142857	0.974314	independent GO term
glutamate decarboxylation to succinate	0	0.974314	dependent GO term
methionine metabolic process	0.222222	0.974314	independent GO term
S-adenosylmethionine biosynthetic process	0.5	0.974314	independent GO term
activation of transmembrane receptor protein tyrosine kinase activity	0.230769	0.974314	independent GO term
common-partner SMAD protein phosphorylation	0.263158	0.974314	independent GO term
phospholipase C-activating G-protein coupled glutamate receptor signaling pathway	0	0.974314	independent GO term
gamma-aminobutyric acid signaling pathway	0.0666667	0.974314	independent GO term
cytoplasmic sequestering of NF-kappaB	0.166667	0.974314	independent GO term
retrograde axon cargo transport	0.166667	0.974314	independent GO term
deoxyribonucleoside diphosphate metabolic process	0.5	0.974314	independent GO term
gamma-aminobutyric acid catabolic process	0	0.974314	independent GO term
positive regulation of heart rate	0.212121	0.974314	independent GO term
positive regulation of cholesterol esterification	0.5	0.974314	independent GO term
negative regulation of intestinal phytosterol absorption	0	0.974314	independent GO term
tonic smooth muscle contraction	0.3125	0.974314	independent GO term
heparan sulfate proteoglycan biosynthetic process	0	0.974314	independent GO term
heparan sulfate proteoglycan biosynthetic process, polysaccharide chain biosynthetic process	0	0.974314	independent GO term
bile acid and bile salt transport	0.666667	0.974314	independent GO term
telomere capping	0.5	0.974314	independent GO term
keratan sulfate biosynthetic process	0.210526	0.974314	independent GO term
protein farnesylation	0	0.974314	independent GO term
L-methionine salvage from methylthioadenosine	0	0.974314	dependent GO term
spinal cord oligodendrocyte cell fate specification	0	0.974314	independent GO term
protection from non-homologous end joining at telomere	0.333333	0.974314	independent GO term
Ral protein signal transduction	0	0.974314	independent GO term
negative regulation of interleukin-1 beta production	0.344828	0.974314	independent GO term
positive regulation of protein import into nucleus, translocation	0.237288	0.974314	dependent GO term
positive regulation of NAD(P)H oxidase activity	0.5	0.974314	independent GO term
negative regulation of toll-like receptor signaling pathway	0.152174	0.974314	independent GO term
low-density lipoprotein particle remodeling	0.35	0.974314	independent GO term
mitochondrial protein catabolic process	0	0.974314	independent GO term
enteroendocrine cell differentiation	0	0.974314	independent GO term
interleukin-7-mediated signaling pathway	0	0.974314	independent GO term
interleukin-23-mediated signaling pathway	0.5	0.974314	independent GO term
keratan sulfate catabolic process	0.35	0.974314	independent GO term
negative regulation of tumor necrosis factor biosynthetic process	0.25	0.974314	independent GO term
myeloid dendritic cell differentiation	0.290323	0.974314	independent GO term
maintenance of DNA repeat elements	0.25	0.974314	independent GO term
positive regulation of interleukin-12 biosynthetic process	0.25	0.974314	dependent GO term
type I interferon biosynthetic process	0.25	0.974314	independent GO term
positive regulation of interferon-beta biosynthetic process	0.1	0.974314	independent GO term
negative regulation of interleukin-6 biosynthetic process	0	0.974314	dependent GO term
positive regulation of interleukin-6 biosynthetic process	0.1	0.974314	dependent GO term
negative regulation of intestinal cholesterol absorption	0	0.974314	independent GO term
negative regulation of alpha-beta T cell proliferation	0.117647	0.974314	independent GO term
induction of positive chemotaxis	0.25	0.974314	dependent GO term
positive regulation of helicase activity	0.25	0.974314	independent GO term
DNA ligation involved in DNA repair	0.0714286	0.974314	dependent GO term
positive regulation of fibrinolysis	0.357143	0.974314	independent GO term
Bergmann glial cell differentiation	0.0645161	0.974314	independent GO term
negative regulation of pathway-restricted SMAD protein phosphorylation	0.142857	0.974314	dependent GO term
positive regulation of epithelial cell proliferation involved in lung morphogenesis	0	0.974314	independent GO term
regulation of branching involved in salivary gland morphogenesis by mesenchymal-epithelial signaling	0.25	0.974314	independent GO term
branch elongation involved in salivary gland morphogenesis	0	0.974314	independent GO term
positive regulation of mast cell chemotaxis	0.375	0.974314	independent GO term
mesenchymal cell differentiation involved in lung development	0	0.974314	independent GO term
DNA cytosine deamination	0	0.974314	independent GO term
chaperone cofactor-dependent protein refolding	0.25	0.974314	independent GO term
neutrophil aggregation	0.25	0.974314	independent GO term
cholesterol import	0.428571	0.974314	independent GO term
caveola assembly	0.0588235	0.974314	independent GO term
CUT catabolic process	0	0.974314	independent GO term
cellular response to peptidoglycan	0.333333	0.974314	independent GO term
cellular response to lithium ion	0.204082	0.974314	independent GO term
synaptic vesicle clustering	0.166667	0.974314	independent GO term
N-methyl-D-aspartate receptor clustering	0.0588235	0.974314	dependent GO term
postsynaptic density protein 95 clustering	0.0833333	0.974314	independent GO term
negative regulation of hydrogen peroxide-mediated programmed cell death	1	0.974314	independent GO term
regulation of activin receptor signaling pathway	0.0606061	0.973184	independent GO term
Arp2/3 complex-mediated actin nucleation	0.133333	0.968099	independent GO term
regulation of platelet aggregation	0.0925926	0.968099	independent GO term
viral protein processing	0.192308	0.957759	independent GO term
positive regulation by host of viral transcription	0.176471	0.943723	independent GO term
regulation of interleukin-12 biosynthetic process	0.21875	0.943723	independent GO term
positive regulation of positive chemotaxis	0.197183	0.943723	independent GO term
JAK-STAT cascade involved in growth hormone signaling pathway	0.224719	0.937609	independent GO term
chromatin silencing at rDNA	0.142857	0.931173	independent GO term
meiotic mismatch repair	0.125	0.931173	dependent GO term
pro-B cell differentiation	0.08	0.931173	independent GO term
rRNA catabolic process	0	0.931173	independent GO term
positive regulation of telomere maintenance	0.2	0.931173	dependent GO term
regulation of protein import into nucleus, translocation	0.257143	0.931173	independent GO term
regulation of protein sumoylation	0.23913	0.931173	independent GO term
synaptic transmission, glutamatergic	0.113636	0.931173	independent GO term
sequestering of TGFbeta in extracellular matrix	0.0909091	0.931173	independent GO term
mast cell degranulation	0	0.931173	independent GO term
positive regulation of chemokine biosynthetic process	0.181818	0.931173	independent GO term
positive regulation of erythrocyte differentiation	0.0945946	0.931173	independent GO term
negative regulation of DNA recombination	0.111111	0.931173	independent GO term
negative regulation of insulin secretion	0.0652174	0.931173	dependent GO term
regulation of axon extension involved in axon guidance	0.111111	0.931173	independent GO term
negative regulation of axon extension involved in axon guidance	0.111111	0.931173	dependent GO term
positive regulation of synaptic transmission, glutamatergic	0.0769231	0.931173	independent GO term
regulation of alpha-amino-3-hydroxy-5-methyl-4-isoxazole propionate selective glutamate receptor activity	0.0571429	0.931173	independent GO term
pathway-restricted SMAD protein phosphorylation	0.192308	0.921765	independent GO term
nucleotide-excision repair, DNA damage removal	0.189189	0.903859	independent GO term
double-strand break repair via nonhomologous end joining	0.285714	0.8881	independent GO term
regulation of telomere maintenance	0.277778	0.8881	independent GO term
regulation of telomere maintenance via telomerase	0.428571	0.876918	dependent GO term
regulation of blood volume by renin-angiotensin	0.153846	0.876831	dependent GO term
vascular smooth muscle contraction	0.277778	0.876831	independent GO term
positive regulation of activin receptor signaling pathway	0.128205	0.876831	dependent GO term
substrate adhesion-dependent cell spreading	0.139241	0.876831	independent GO term
interleukin-4-mediated signaling pathway	0.0666667	0.876831	dependent GO term
enucleate erythrocyte differentiation	0.0416667	0.876831	independent GO term
regulation of memory T cell differentiation	0.3	0.876831	independent GO term
regulation of translation in response to stress	0.296296	0.876831	independent GO term
copper ion homeostasis	0.133333	0.876831	independent GO term
epithelial tube branching involved in lung morphogenesis	0.233333	0.876831	independent GO term
cellular response to interleukin-4	0.1	0.876831	independent GO term
regulation of N-methyl-D-aspartate selective glutamate receptor activity	0.15625	0.876831	independent GO term
positive regulation of T-helper 17 cell lineage commitment	0.5	0.876831	independent GO term
negative regulation of extrinsic apoptotic signaling pathway in absence of ligand	0.209677	0.876831	dependent GO term
positive regulation of phosphatidylinositol 3-kinase activity	0.21978	0.85099	independent GO term
platelet-derived growth factor receptor signaling pathway	0.202703	0.85099	independent GO term
termination of RNA polymerase I transcription	0.25	0.849341	independent GO term
transcription elongation from RNA polymerase III promoter	0.1	0.836497	independent GO term
termination of RNA polymerase III transcription	0.1	0.836497	independent GO term
negative regulation of adenylate cyclase activity	0.138889	0.815985	independent GO term
high-density lipoprotein particle remodeling	0.3	0.815985	independent GO term
RNA polyadenylation	0.1	0.815985	independent GO term
reverse cholesterol transport	0.3	0.815985	independent GO term
positive regulation of synapse assembly	0.0344828	0.815985	independent GO term
Notch signaling involved in heart development	0.0909091	0.815985	independent GO term
ephrin receptor signaling pathway	0.125	0.790141	independent GO term
positive regulation of T cell cytokine production	0.105263	0.752117	independent GO term
negative regulation of stress-activated MAPK cascade	0.175439	0.752117	independent GO term
positive regulation of Ras protein signal transduction	0.197674	0.752117	independent GO term
vesicle transport along microtubule	0.139535	0.752117	independent GO term
regulation of focal adhesion assembly	0.211765	0.752117	independent GO term
regulation of actin cytoskeleton reorganization	0.137931	0.752117	independent GO term
transcription elongation from RNA polymerase I promoter	0.242424	0.729271	independent GO term
positive regulation of epithelial to mesenchymal transition	0.15	0.729271	independent GO term
autophagic vacuole fusion	0	0.705125	independent GO term
inactivation of MAPK activity	0.05	0.705125	independent GO term
MAPK import into nucleus	0.333333	0.705125	independent GO term
regulation of transcription from RNA polymerase II promoter by glucose	0.5	0.705125	dependent GO term
DNA catabolic process, exonucleolytic	0.2	0.705125	independent GO term
prostaglandin biosynthetic process	0.148148	0.705125	dependent GO term
ganglioside metabolic process	0.5	0.705125	independent GO term
natural killer cell differentiation	0.142857	0.705125	independent GO term
histamine secretion	0.166667	0.705125	independent GO term
synaptic transmission, dopaminergic	0.137931	0.705125	independent GO term
norepinephrine-epinephrine vasoconstriction involved in regulation of systemic arterial blood pressure	0	0.705125	independent GO term
positive regulation of heart rate by epinephrine-norepinephrine	0	0.705125	dependent GO term
positive regulation of neuroblast proliferation	0.244898	0.705125	independent GO term
immature B cell differentiation	0	0.705125	independent GO term
mast cell chemotaxis	0.0869565	0.705125	independent GO term
serotonin secretion by platelet	0	0.705125	independent GO term
positive regulation of T cell tolerance induction	0.172414	0.705125	independent GO term
immune response-inhibiting cell surface receptor signaling pathway	0.173913	0.705125	independent GO term
renal sodium ion transport	0.210526	0.705125	independent GO term
regulation of systemic arterial blood pressure by endothelin	0.25	0.705125	independent GO term
negative regulation of glomerular filtration	0	0.705125	independent GO term
regulation of secondary heart field cardioblast proliferation	0.153846	0.705125	independent GO term
growth plate cartilage development	0.466667	0.705125	independent GO term
regulation of glycogen catabolic process	0.214286	0.705125	independent GO term
lactose biosynthetic process	0	0.705125	independent GO term
isocitrate metabolic process	0.125	0.705125	independent GO term
DNA topological change	0.136364	0.705125	independent GO term
DNA replication, synthesis of RNA primer	0	0.705125	independent GO term
nucleotide-excision repair, DNA incision, 3'-to lesion	0	0.705125	dependent GO term
nucleotide-excision repair, DNA incision, 5'-to lesion	0	0.705125	dependent GO term
DNA replication-dependent nucleosome assembly	0	0.705125	independent GO term
transcription initiation from RNA polymerase III promoter	0	0.705125	independent GO term
transcription initiation from mitochondrial promoter	0	0.705125	independent GO term
histone mRNA 3'-end processing	0	0.705125	independent GO term
arginine catabolic process	0	0.705125	independent GO term
ribosomal protein import into nucleus	0.153846	0.705125	independent GO term
protein retention in ER lumen	0.235294	0.705125	independent GO term
sphingosine metabolic process	0.125	0.705125	independent GO term
sphingomyelin metabolic process	0	0.705125	independent GO term
sphingomyelin biosynthetic process	0	0.705125	dependent GO term
leukotriene metabolic process	0.129032	0.705125	independent GO term
prostaglandin metabolic process	0.219512	0.705125	independent GO term
cholesterol catabolic process	0.5	0.705125	independent GO term
biotin metabolic process	0.222222	0.705125	independent GO term
zinc ion transport	0	0.705125	independent GO term
inflammatory cell apoptotic process	0.212121	0.705125	independent GO term
negative regulation of transcription from RNA polymerase II promoter during mitosis	0.214286	0.705125	independent GO term
G-protein coupled receptor signaling pathway coupled to cGMP nucleotide second messenger	0.117647	0.705125	independent GO term
G-protein coupled acetylcholine receptor signaling pathway	0	0.705125	independent GO term
JUN phosphorylation	0	0.705125	independent GO term
STAT protein import into nucleus	0.307692	0.705125	independent GO term
acrosome reaction	0	0.705125	independent GO term
fusion of sperm to egg plasma membrane	0.333333	0.705125	independent GO term
dosage compensation	0.0454545	0.705125	independent GO term
negative regulation of female receptivity	0	0.705125	independent GO term
sulfate transport	0	0.705125	independent GO term
purine nucleobase biosynthetic process	0.2	0.705125	independent GO term
mRNA transcription	0.181818	0.705125	independent GO term
snRNA transcription	0.125	0.705125	independent GO term
auditory receptor cell fate commitment	0	0.705125	independent GO term
proteasomal ubiquitin-independent protein catabolic process	0.2	0.705125	independent GO term
positive regulation of platelet-derived growth factor receptor signaling pathway	0	0.705125	independent GO term
regulation of definitive erythrocyte differentiation	0	0.705125	independent GO term
negative regulation of plasma membrane long-chain fatty acid transport	0.304348	0.705125	independent GO term
regulation of fibroblast migration	0.333333	0.705125	independent GO term
positive regulation of fibroblast migration	0.357143	0.705125	dependent GO term
negative regulation of keratinocyte proliferation	0.105263	0.705125	independent GO term
negative regulation of receptor biosynthetic process	0.363636	0.705125	independent GO term
positive regulation of heparan sulfate proteoglycan biosynthetic process	0.5	0.705125	independent GO term
negative regulation of macrophage cytokine production	0.4	0.705125	independent GO term
positive regulation of glutamate secretion	0.285714	0.705125	independent GO term
regulation of norepinephrine secretion	0.125	0.705125	independent GO term
skeletal myofibril assembly	0	0.705125	independent GO term
cardiac muscle hypertrophy in response to stress	0.0555556	0.705125	independent GO term
positive regulation of smooth muscle cell migration	0.212121	0.705125	independent GO term
L-glutamate transport	0.111111	0.705125	independent GO term
cytidine to uridine editing	0	0.705125	independent GO term
protein import into peroxisome matrix, docking	0	0.705125	independent GO term
Rac protein signal transduction	0.0625	0.705125	independent GO term
peptidyl-arginine methylation	0	0.705125	independent GO term
peptidyl-proline hydroxylation to 4-hydroxy-L-proline	0.416667	0.705125	independent GO term
leukotriene biosynthetic process	0.0909091	0.705125	dependent GO term
lipoxygenase pathway	0.2	0.705125	independent GO term
peptide cross-linking via chondroitin 4-sulfate glycosaminoglycan	0.454545	0.705125	dependent GO term
visceral motor neuron differentiation	0	0.705125	dependent GO term
spinal cord association neuron differentiation	0.133333	0.705125	independent GO term
cerebral cortex tangential migration	0	0.705125	independent GO term
forebrain neuroblast division	0.130435	0.705125	independent GO term
convergent extension involved in neural plate elongation	0.2	0.705125	independent GO term
primary miRNA processing	0.0810811	0.705125	independent GO term
replication fork processing	0	0.705125	independent GO term
intra-S DNA damage checkpoint	0.428571	0.705125	independent GO term
regulation of myelination	0.32	0.705125	independent GO term
positive regulation of cyclin-dependent protein serine/threonine kinase activity involved in G1/S transition of mitotic cell cycle	0.228571	0.705125	dependent GO term
positive regulation of lipopolysaccharide-mediated signaling pathway	0.1	0.705125	independent GO term
positive regulation of synaptic plasticity	0.5	0.705125	independent GO term
positive regulation of fatty acid beta-oxidation	0.307692	0.705125	dependent GO term
negative regulation of appetite	0.25	0.705125	independent GO term
negative regulation of chondrocyte differentiation	0.232558	0.705125	independent GO term
negative regulation of ATPase activity	0	0.705125	independent GO term
positive regulation of ATPase activity	0.111111	0.705125	independent GO term
negative regulation of epinephrine secretion	0	0.705125	dependent GO term
regulation of natural killer cell proliferation	0.352941	0.705125	independent GO term
negative regulation of DNA endoreduplication	0.125	0.705125	independent GO term
negative regulation of viral transcription	0.220339	0.705125	independent GO term
negative regulation of collagen biosynthetic process	0.285714	0.705125	independent GO term
regulation of myeloid cell apoptotic process	0.26	0.705125	independent GO term
fatty acid beta-oxidation using acyl-CoA oxidase	0.5	0.705125	independent GO term
phospholipid efflux	0.272727	0.705125	independent GO term
high-density lipoprotein particle assembly	0.272727	0.705125	independent GO term
microtubule anchoring at centrosome	0	0.705125	independent GO term
cellular response to interferon-beta	0.294118	0.705125	independent GO term
purinergic nucleotide receptor signaling pathway	0.4	0.705125	independent GO term
endothelial cell chemotaxis	0.142857	0.705125	independent GO term
negative regulation of renal sodium excretion	0	0.705125	independent GO term
vascular smooth muscle cell differentiation	0.185185	0.705125	independent GO term
cellular response to interleukin-3	0	0.705125	independent GO term
alpha-linolenic acid metabolic process	0.5	0.705125	independent GO term
opioid receptor signaling pathway	0	0.705125	independent GO term
interleukin-5-mediated signaling pathway	0	0.705125	independent GO term
interleukin-3-mediated signaling pathway	0	0.705125	independent GO term
prolactin signaling pathway	0.1	0.705125	independent GO term
erythropoietin-mediated signaling pathway	0	0.705125	independent GO term
MDA-5 signaling pathway	0.0909091	0.705125	independent GO term
heme catabolic process	0	0.705125	independent GO term
negative regulation of circadian sleep/wake cycle, sleep	0.0833333	0.705125	independent GO term
positive regulation of odontogenesis	0.3125	0.705125	independent GO term
detection of triacyl bacterial lipopeptide	0.5	0.705125	independent GO term
detection of diacyl bacterial lipopeptide	0.5	0.705125	independent GO term
negative regulation of tyrosine phosphorylation of Stat3 protein	0.12	0.705125	dependent GO term
mRNA transcription from RNA polymerase II promoter	0.114286	0.705125	dependent GO term
glucocorticoid receptor signaling pathway	0.185185	0.705125	independent GO term
Golgi to plasma membrane protein transport	0.117647	0.705125	independent GO term
surfactant homeostasis	0.24	0.705125	independent GO term
negative regulation of potassium ion transport	0.0540541	0.705125	independent GO term
natural killer cell degranulation	0	0.705125	independent GO term
regulation of transcription from RNA polymerase II promoter in response to oxidative stress	0.0714286	0.705125	independent GO term
negative regulation by host of viral transcription	0.207547	0.705125	dependent GO term
regulation of DNA methylation	0.2	0.705125	independent GO term
negative regulation of interferon-gamma biosynthetic process	0	0.705125	independent GO term
regulation of circadian sleep/wake cycle, non-REM sleep	0.25	0.705125	independent GO term
negative regulation of B cell differentiation	0.0833333	0.705125	dependent GO term
regulation of auditory receptor cell differentiation	0.272727	0.705125	independent GO term
negative regulation of T-helper 1 cell differentiation	0	0.705125	dependent GO term
negative regulation of macrophage differentiation	0.142857	0.705125	independent GO term
negative regulation of low-density lipoprotein particle receptor biosynthetic process	0.375	0.705125	dependent GO term
negative regulation of gluconeogenesis	0.5	0.705125	independent GO term
negative regulation of heart contraction	0.275	0.705125	independent GO term
positive regulation of smoothened signaling pathway	0.111111	0.705125	independent GO term
negative regulation of mitotic recombination	0.5	0.705125	dependent GO term
carbon catabolite regulation of transcription	0.1	0.705125	independent GO term
regulation of transcription by glucose	0.166667	0.705125	dependent GO term
negative regulation of JAK-STAT cascade	0.0869565	0.705125	independent GO term
platelet activating factor metabolic process	0	0.705125	independent GO term
sphingosine biosynthetic process	0	0.705125	dependent GO term
positive regulation of insulin receptor signaling pathway	0.230769	0.705125	independent GO term
positive regulation of protein export from nucleus	0.268293	0.705125	dependent GO term
regulation of RNA export from nucleus	0.117647	0.705125	independent GO term
negative regulation of RNA export from nucleus	0.142857	0.705125	dependent GO term
positive regulation of hormone biosynthetic process	0.235294	0.705125	independent GO term
macrophage chemotaxis	0.227273	0.705125	independent GO term
vesicle fusion with Golgi apparatus	0	0.705125	independent GO term
positive regulation of isotype switching to IgG isotypes	0.111111	0.705125	independent GO term
positive regulation of retinoic acid receptor signaling pathway	0.333333	0.705125	independent GO term
sarcomerogenesis	0	0.705125	independent GO term
3'-phosphoadenosine 5'-phosphosulfate metabolic process	0	0.705125	independent GO term
negative regulation of lipoprotein metabolic process	0.375	0.705125	independent GO term
positive regulation of dendrite morphogenesis	0.177778	0.705125	independent GO term
negative regulation of neurotrophin TRK receptor signaling pathway	0.5	0.705125	independent GO term
maintenance of protein location in nucleus	0.166667	0.705125	independent GO term
positive regulation of focal adhesion assembly	0.191489	0.705125	dependent GO term
negative regulation of telomerase activity	0.318182	0.705125	independent GO term
regulation of attachment of spindle microtubules to kinetochore	0.173913	0.705125	independent GO term
phospholipid homeostasis	0.36	0.705125	independent GO term
lens induction in camera-type eye	0.285714	0.705125	independent GO term
positive regulation of type I interferon-mediated signaling pathway	0.333333	0.705125	independent GO term
cardiac muscle cell myoblast differentiation	0.363636	0.705125	independent GO term
positive regulation of cardiac muscle contraction	0.208333	0.705125	independent GO term
regulation of calcidiol 1-monooxygenase activity	0.368421	0.705125	independent GO term
positive regulation of calcidiol 1-monooxygenase activity	0.333333	0.705125	dependent GO term
negative regulation of mitotic anaphase-promoting complex activity	0.5	0.705125	independent GO term
branch elongation involved in mammary gland duct branching	0.636364	0.705125	independent GO term
negative regulation of androgen receptor signaling pathway	0.166667	0.705125	dependent GO term
dendritic spine morphogenesis	0.0526316	0.705125	independent GO term
positive regulation of myeloid leukocyte cytokine production involved in immune response	0.16129	0.705125	independent GO term
neuroendocrine cell differentiation	0.16	0.705125	independent GO term
protein trimerization	0.208333	0.705125	independent GO term
nucleotide-binding oligomerization domain containing 2 signaling pathway	0.181818	0.705125	dependent GO term
regulation of centromeric sister chromatid cohesion	0.416667	0.705125	independent GO term
regulation of bile acid biosynthetic process	0.333333	0.705125	independent GO term
protein localization to chromatin	0.333333	0.705125	independent GO term
cellular response to bacterial lipopeptide	0.230769	0.705125	independent GO term
cellular response to gonadotropin stimulus	0.0689655	0.705125	independent GO term
potassium ion export	0	0.705125	independent GO term
cellular response to gamma radiation	0.133333	0.705125	independent GO term
cellular response to diacyl bacterial lipopeptide	0.5	0.705125	dependent GO term
cellular response to triacyl bacterial lipopeptide	0.5	0.705125	dependent GO term
transcriptional activation by promoter-enhancer looping	0	0.705125	independent GO term
positive regulation of fever generation by positive regulation of prostaglandin secretion	0	0.705125	independent GO term
TNFSF11-mediated signaling pathway	0	0.705125	independent GO term
glomerular visceral epithelial cell differentiation	0.5	0.705125	independent GO term
metanephric distal tubule development	0	0.705125	independent GO term
metanephric loop of Henle development	0	0.705125	independent GO term
plus-end-directed vesicle transport along microtubule	0.111111	0.705125	dependent GO term
minus-end-directed organelle transport along microtubule	0	0.705125	independent GO term
negative regulation of establishment of protein localization to plasma membrane	0.0909091	0.705125	independent GO term
positive regulation of steroid hormone biosynthetic process	0.333333	0.705125	dependent GO term
positive regulation of synapse maturation	0.105263	0.705125	independent GO term
negative regulation of calcium ion import	0	0.705125	independent GO term
positive regulation of protein targeting to membrane	0.228571	0.705125	independent GO term
mature dendritic cell differentiation	0	0.705125	independent GO term
gephyrin clustering	0	0.705125	independent GO term
neuronal stem cell maintenance	0.148148	0.705125	independent GO term
semaphorin-plexin signaling pathway involved in bone trabecula morphogenesis	0	0.705125	independent GO term
negative regulation of intrinsic apoptotic signaling pathway in response to DNA damage by p53 class mediator	0.214286	0.705125	independent GO term
regulation of protein ubiquitination involved in ubiquitin-dependent protein catabolic process	0.288889	0.705125	independent GO term
positive regulation of protein ubiquitination involved in ubiquitin-dependent protein catabolic process	0.297297	0.705125	dependent GO term
positive regulation of actin cytoskeleton reorganization	0.162162	0.705125	dependent GO term
positive regulation of chemokine (C-X-C motif) ligand 2 production	0.0625	0.705125	independent GO term
positive regulation of natural killer cell chemotaxis	0.25	0.705125	independent GO term
positive regulation of dendritic cell chemotaxis	0.214286	0.705125	independent GO term
positive regulation of gastrulation	0.181818	0.705125	independent GO term
negative regulation of dendritic cell apoptotic process	0	0.705125	dependent GO term
negative regulation of dendritic cell differentiation	0	0.705125	independent GO term
positive regulation of glucose import in response to insulin stimulus	0.25	0.705125	independent GO term
lipoxin metabolic process	0	0.705125	independent GO term
visual learning	0.109589	0.700027	independent GO term
DNA recombinase assembly	0.266667	0.687756	independent GO term
tRNA transcription	0	0.687756	independent GO term
negative regulation of telomere maintenance	0.2	0.687756	dependent GO term
receptor clustering	0.169231	0.687756	independent GO term
transcription initiation from RNA polymerase I promoter	0.276596	0.683513	independent GO term
transcription from RNA polymerase I promoter	0.276596	0.653083	independent GO term
activation of NF-kappaB-inducing kinase activity	0.204082	0.652647	independent GO term
negative regulation of hormone secretion	0.153846	0.652647	independent GO term
regulation of extrinsic apoptotic signaling pathway in absence of ligand	0.235294	0.646986	independent GO term
positive regulation of membrane potential	0.122807	0.624703	independent GO term
nucleotide-binding oligomerization domain containing signaling pathway	0.130435	0.616668	independent GO term
retinoid metabolic process	0.245283	0.597623	dependent GO term
mismatch repair	0.25	0.597623	independent GO term
diterpenoid metabolic process	0.233333	0.597623	independent GO term
single strand break repair	0.0625	0.592101	independent GO term
establishment of mitotic spindle orientation	0.117647	0.592101	dependent GO term
positive regulation of immune response to tumor cell	0.0952381	0.592101	independent GO term
positive regulation of natural killer cell mediated cytotoxicity directed against tumor cell target	0.125	0.592101	dependent GO term
regulation of the force of heart contraction by chemical signal	0.0714286	0.592101	independent GO term
citrate metabolic process	0.5	0.592101	independent GO term
cellular copper ion homeostasis	0.125	0.592101	dependent GO term
SMAD protein import into nucleus	0.315789	0.592101	independent GO term
I-kappaB phosphorylation	0.15	0.592101	independent GO term
ribonucleoside monophosphate biosynthetic process	0.2	0.592101	independent GO term
potassium ion import	0.25	0.592101	independent GO term
negative regulation of B cell proliferation	0.18	0.592101	dependent GO term
positive regulation of intracellular estrogen receptor signaling pathway	0.1875	0.592101	dependent GO term
negative regulation of histone acetylation	0.0967742	0.592101	independent GO term
interleukin-2-mediated signaling pathway	0.25	0.592101	independent GO term
auditory receptor cell differentiation	0.105263	0.592101	dependent GO term
very long-chain fatty acid catabolic process	0	0.592101	independent GO term
mitochondrial ATP synthesis coupled electron transport	0.125	0.592101	independent GO term
negative regulation of DNA damage response, signal transduction by p53 class mediator	0.296296	0.592101	independent GO term
intermediate filament bundle assembly	0.166667	0.592101	independent GO term
negative regulation of T cell differentiation	0.225	0.592101	independent GO term
negative regulation of smoothened signaling pathway	0.219512	0.592101	independent GO term
positive regulation of calcium ion-dependent exocytosis	0.2	0.592101	independent GO term
negative regulation of alpha-beta T cell differentiation	0.133333	0.592101	dependent GO term
positive regulation of follicle-stimulating hormone secretion	0.0625	0.592101	dependent GO term
Tie signaling pathway	0.25	0.592101	independent GO term
negative regulation of synaptic transmission	0	0.592101	independent GO term
progesterone receptor signaling pathway	0.357143	0.592101	independent GO term
positive regulation of lipid catabolic process	0.243243	0.592101	independent GO term
establishment of spindle orientation	0.097561	0.592101	independent GO term
negative regulation of cell cycle arrest	0.233333	0.592101	independent GO term
spindle assembly involved in mitosis	0.230769	0.592101	dependent GO term
preassembly of GPI anchor in ER membrane	0	0.56419	independent GO term
positive regulation of interleukin-1 secretion	0.192308	0.56419	independent GO term
interleukin-1-mediated signaling pathway	0.194444	0.56419	independent GO term
DNA replication initiation	0.184211	0.559559	independent GO term
neural crest cell differentiation	0.103448	0.514924	independent GO term
regulation of systemic arterial blood pressure by renin-angiotensin	0.227273	0.507023	independent GO term
tRNA aminoacylation for protein translation	0.294118	0.507023	independent GO term
signal complex assembly	0.2	0.507023	independent GO term
positive regulation of interferon-beta production	0.206897	0.507023	independent GO term
positive regulation of interleukin-1 beta production	0.298246	0.507023	independent GO term
DNA synthesis involved in DNA repair	0.266667	0.497191	independent GO term
positive regulation of cell-matrix adhesion	0.153846	0.497191	independent GO term
release of sequestered calcium ion into cytosol by sarcoplasmic reticulum	0.25	0.497191	independent GO term
attachment of GPI anchor to protein	0.0909091	0.497191	independent GO term
granulocyte differentiation	0.135135	0.497191	independent GO term
positive regulation of pseudopodium assembly	0.16	0.497191	independent GO term
negative regulation of telomere maintenance via telomerase	0.3	0.497191	dependent GO term
positive regulation of chondrocyte differentiation	0.107143	0.497191	independent GO term
positive regulation of natural killer cell differentiation	0	0.497191	dependent GO term
positive regulation of intracellular steroid hormone receptor signaling pathway	0.097561	0.497191	independent GO term
nucleotide-excision repair, DNA incision	0.285714	0.497191	independent GO term
protein localization to Golgi apparatus	0	0.497191	independent GO term
behavioral response to nicotine	0.666667	0.497191	independent GO term
5S class rRNA transcription from RNA polymerase III type 1 promoter	0	0.497191	independent GO term
tRNA transcription from RNA polymerase III promoter	0	0.497191	dependent GO term
positive regulation of B cell differentiation	0.047619	0.497191	dependent GO term
positive regulation of Notch signaling pathway	0.15	0.497191	independent GO term
positive regulation of fatty acid oxidation	0.290323	0.497191	independent GO term
regulation of protein export from nucleus	0.180723	0.497191	independent GO term
regulation of neurotransmitter secretion	0.0566038	0.497191	independent GO term
clathrin coat assembly	0.12	0.497191	independent GO term
nuclear pore complex assembly	0.272727	0.497191	independent GO term
regulation of dendritic spine morphogenesis	0.242424	0.497191	independent GO term
activin receptor signaling pathway	0.0727273	0.453685	independent GO term
angiotensin maturation	0.318182	0.417492	dependent GO term
olfactory bulb interneuron differentiation	0.5	0.417492	independent GO term
hair cell differentiation	0.222222	0.417492	independent GO term
negative regulation of JNK cascade	0.179487	0.417492	dependent GO term
regulation of follicle-stimulating hormone secretion	0.0625	0.417492	independent GO term
negative regulation of follicle-stimulating hormone secretion	0.142857	0.417492	dependent GO term
negative regulation of B cell activation	0.180556	0.417492	independent GO term
spindle assembly	0.206349	0.417492	independent GO term
histone H3-K4 methylation	0.0555556	0.417492	independent GO term
inner ear receptor cell differentiation	0.24	0.417492	independent GO term
mammary gland branching involved in pregnancy	0.333333	0.417492	independent GO term
T cell differentiation in thymus	0.239437	0.392811	independent GO term
macroautophagy	0.142857	0.350567	independent GO term
embryonic camera-type eye development	0.0769231	0.350567	independent GO term
positive regulation of natural killer cell activation	0.178571	0.350567	independent GO term
regulation of neuronal synaptic plasticity	0.0526316	0.350567	independent GO term
eosinophil chemotaxis	0.266667	0.350567	independent GO term
regulation of androgen receptor signaling pathway	0.153846	0.350567	independent GO term
interleukin-6-mediated signaling pathway	0.233333	0.350567	independent GO term
negative regulation of leukocyte apoptotic process	0.157895	0.350567	independent GO term
sensory perception of taste	0.117647	0.294369	independent GO term
synaptic vesicle exocytosis	0.102564	0.291647	independent GO term
positive regulation of bone mineralization	0.144928	0.291647	independent GO term
peptide cross-linking	0.254902	0.281099	independent GO term
COPI-coated vesicle budding	0	0.281099	independent GO term
growth hormone receptor signaling pathway	0.277778	0.275563	independent GO term
ventricular cardiac muscle tissue development	0	0.247695	independent GO term
regulation of postsynaptic membrane potential	0.117647	0.236151	independent GO term
GPI anchor biosynthetic process	0	0.217776	independent GO term
positive regulation of interferon-alpha production	0.2	0.207552	independent GO term
positive regulation of extrinsic apoptotic signaling pathway	0.171053	0.207552	independent GO term
SMAD protein complex assembly	0.144737	0.174277	independent GO term
T cell homeostasis	0.387097	0.146336	independent GO term
regulation of B cell differentiation	0.0961538	0.146336	independent GO term
DNA damage response, signal transduction by p53 class mediator resulting in transcription of p21 class mediator	0.326087	0.122874	independent GO term
peptide hormone processing	0.25	0.086631	independent GO term
toll-like receptor 5 signaling pathway	0.183007	0.0319778	independent GO term
toll-like receptor 10 signaling pathway	0.183007	0.0319778	independent GO term
protein localization to nucleus	0.164557	0.000507449	independent GO term
regulation of G1/S transition of mitotic cell cycle	0.238532	0.000302856	independent GO term
mitotic G1 DNA damage checkpoint	0.275862	3.63502e-05	dependent GO term
negative regulation of G1/S transition of mitotic cell cycle	0.237288	4.34584e-06	dependent GO term

## Sheet: early
GO terms	diseae enrichment ratio	Significance Strength (SS) score	GO term type
immune response-inhibiting cell surface receptor signaling pathway	0	1	independent GO term
ATP hydrolysis coupled proton transport	0	1	dependent GO term
L-methionine salvage from methylthioadenosine	0	1	independent GO term
positive regulation of B cell differentiation	0.102941	1	independent GO term
regulation of ventricular cardiac muscle cell membrane repolarization	0.136364	1	independent GO term
regulation of monocyte chemotaxis	0.32	1	independent GO term
positive regulation of monocyte chemotaxis	0.363636	1	dependent GO term
DNA replication initiation	0.155556	0.999997	independent GO term
proton transport	0	0.999778	independent GO term
positive regulation of intrinsic apoptotic signaling pathway	0.153061	0.999448	independent GO term
neutrophil activation involved in immune response	0.0517241	0.997647	dependent GO term
citrate metabolic process	0.263158	0.997647	independent GO term
intermediate filament bundle assembly	0.25	0.997647	independent GO term
negative regulation of endothelial cell apoptotic process	0.151515	0.997647	dependent GO term
spliceosomal complex assembly	0.0714286	0.996714	independent GO term
intrinsic apoptotic signaling pathway in response to endoplasmic reticulum stress	0.0851064	0.996714	independent GO term
neutrophil activation	0.103448	0.996249	independent GO term
positive regulation of mast cell degranulation	0.0731707	0.996249	dependent GO term
succinate metabolic process	0.263158	0.991525	independent GO term
regulation of endothelial cell apoptotic process	0.22	0.991525	independent GO term
T cell homeostasis	0.171429	0.990433	independent GO term
natural killer cell differentiation	0.142857	0.982304	independent GO term
myeloid dendritic cell chemotaxis	0	0.982304	independent GO term
serotonin secretion by platelet	0.0689655	0.982304	independent GO term
positive regulation of T cell tolerance induction	0.107143	0.982304	independent GO term
epithelial cell morphogenesis	0.191489	0.982304	independent GO term
regulation of glycogen catabolic process	0.333333	0.982304	independent GO term
acetyl-CoA biosynthetic process from pyruvate	0	0.982304	independent GO term
purine ribonucleoside salvage	0	0.982304	independent GO term
adenine salvage	0	0.982304	independent GO term
guanine salvage	0	0.982304	independent GO term
nucleotide-excision repair, DNA incision, 5'-to lesion	0.5	0.982304	independent GO term
mitotic G2 DNA damage checkpoint	0.314286	0.982304	dependent GO term
STAT protein import into nucleus	0.291667	0.982304	independent GO term
sensory perception of smell	0	0.982304	independent GO term
auditory receptor cell fate commitment	0	0.982304	independent GO term
positive regulation of norepinephrine secretion	0	0.982304	independent GO term
regulation of definitive erythrocyte differentiation	0	0.982304	independent GO term
smooth muscle cell migration	0.1875	0.982304	independent GO term
positive regulation of smooth muscle cell migration	0.244444	0.982304	dependent GO term
ATP synthesis coupled proton transport	0	0.982304	dependent GO term
dolichol metabolic process	0	0.982304	independent GO term
hyaluronan catabolic process	0.421053	0.982304	independent GO term
negative regulation of bone mineralization	0.15	0.982304	independent GO term
primary miRNA processing	0.1875	0.982304	independent GO term
replication fork processing	0.333333	0.982304	independent GO term
intra-S DNA damage checkpoint	0.214286	0.982304	independent GO term
positive regulation of fatty acid beta-oxidation	0.384615	0.982304	dependent GO term
GMP salvage	0	0.982304	independent GO term
IMP salvage	0	0.982304	independent GO term
Ral protein signal transduction	0	0.982304	independent GO term
cargo loading into vesicle	0	0.982304	independent GO term
interleukin-7-mediated signaling pathway	0.222222	0.982304	independent GO term
interleukin-8-mediated signaling pathway	0.285714	0.982304	independent GO term
prolactin signaling pathway	0.190476	0.982304	independent GO term
negative regulation of NF-kappaB import into nucleus	0.0612245	0.982304	independent GO term
positive regulation of tumor necrosis factor biosynthetic process	0.346154	0.982304	independent GO term
mitochondrial ATP synthesis coupled proton transport	0	0.982304	dependent GO term
positive regulation of vascular permeability	0.416667	0.982304	independent GO term
maintenance of DNA repeat elements	0.375	0.982304	independent GO term
negative regulation by host of viral transcription	0.230769	0.982304	independent GO term
negative regulation of erythrocyte differentiation	0.16129	0.982304	independent GO term
positive regulation of megakaryocyte differentiation	0.0769231	0.982304	independent GO term
negative regulation of striated muscle contraction	0.0833333	0.982304	independent GO term
GMP catabolic process	0	0.982304	independent GO term
regulation of RNA export from nucleus	0.117647	0.982304	independent GO term
negative regulation of RNA export from nucleus	0	0.982304	dependent GO term
negative regulation of negative chemotaxis	0.5	0.982304	independent GO term
positive regulation of nitric-oxide synthase activity	0.139535	0.982304	independent GO term
positive regulation of helicase activity	0.333333	0.982304	independent GO term
mesenchymal to epithelial transition	0.148148	0.982304	dependent GO term
negative regulation of pathway-restricted SMAD protein phosphorylation	0.222222	0.982304	dependent GO term
negative regulation of gastric acid secretion	0	0.982304	independent GO term
positive regulation of mast cell chemotaxis	0.5	0.982304	independent GO term
positive regulation of myeloid leukocyte cytokine production involved in immune response	0.25	0.982304	independent GO term
DNA cytosine deamination	0	0.982304	independent GO term
positive regulation of uterine smooth muscle contraction	0.145833	0.982304	independent GO term
neutrophil aggregation	0.5	0.982304	independent GO term
cholesterol import	0.333333	0.982304	independent GO term
caveola assembly	0	0.982304	independent GO term
transcriptional activation by promoter-enhancer looping	0	0.982304	independent GO term
mesonephric tubule development	0.25	0.982304	independent GO term
plus-end-directed vesicle transport along microtubule	0.0833333	0.982304	dependent GO term
synaptic vesicle clustering	0.0833333	0.982304	independent GO term
gephyrin clustering	0.125	0.982304	independent GO term
regulation of DNA biosynthetic process	0.1875	0.982304	independent GO term
positive regulation of chemokine (C-X-C motif) ligand 2 production	0.333333	0.982304	independent GO term
positive regulation of DNA biosynthetic process	0.166667	0.982304	dependent GO term
positive regulation of metanephric mesenchymal cell migration	0	0.982304	independent GO term
negative regulation of dendritic cell differentiation	0	0.982304	independent GO term
high-density lipoprotein particle remodeling	0.25	0.980911	independent GO term
histone H3-K4 methylation	0.0909091	0.980911	independent GO term
B cell homeostasis	0.129032	0.978796	independent GO term
SMAD protein complex assembly	0.217391	0.966226	independent GO term
regulation of mast cell degranulation	0.0588235	0.966226	independent GO term
vesicle transport along microtubule	0.0512821	0.965572	independent GO term
triglyceride homeostasis	0.166667	0.965572	independent GO term
negative regulation of anoikis	0.226415	0.965572	independent GO term
negative regulation of cell-matrix adhesion	0.282609	0.95162	independent GO term
deoxyribonucleotide biosynthetic process	0.363636	0.95162	independent GO term
mRNA modification	0	0.95162	independent GO term
positive regulation of collagen biosynthetic process	0.25	0.95162	independent GO term
protein mannosylation	0	0.95162	independent GO term
sequestering of TGFbeta in extracellular matrix	0	0.95162	dependent GO term
interleukin-2-mediated signaling pathway	0.133333	0.95162	independent GO term
negative regulation of DNA damage response, signal transduction by p53 class mediator	0.16129	0.95162	independent GO term
negative regulation of DNA recombination	0.241379	0.95162	independent GO term
Tie signaling pathway	0.6	0.95162	independent GO term
positive regulation of endoplasmic reticulum unfolded protein response	0.333333	0.95162	independent GO term
extracellular negative regulation of signal transduction	0.12	0.95162	independent GO term
spliceosomal snRNP assembly	0.105263	0.950523	independent GO term
G2 DNA damage checkpoint	0.269841	0.948732	independent GO term
positive regulation of bone mineralization	0.173913	0.937633	independent GO term
peptidyl-glutamic acid carboxylation	0.3125	0.916839	independent GO term
DNA synthesis involved in DNA repair	0.142857	0.911715	independent GO term
transmembrane receptor protein tyrosine phosphatase signaling pathway	0.153846	0.911715	independent GO term
granulocyte differentiation	0.0892857	0.911715	independent GO term
negative regulation of telomere maintenance via telomerase	0.307692	0.911715	dependent GO term
positive regulation of natural killer cell differentiation	0.210526	0.911715	independent GO term
positive regulation of activin receptor signaling pathway	0.157895	0.911715	independent GO term
interleukin-4-mediated signaling pathway	0.285714	0.911715	independent GO term
enucleate erythrocyte differentiation	0.173913	0.911715	independent GO term
positive regulation of fatty acid oxidation	0.333333	0.911715	independent GO term
regulation of mRNA splicing, via spliceosome	0.134615	0.911715	independent GO term
positive regulation of histone modification	0.259259	0.895351	independent GO term
positive regulation of exocytosis	0.115385	0.883312	independent GO term
positive regulation of BMP signaling pathway	0.1875	0.865584	independent GO term
Arp2/3 complex-mediated actin nucleation	0	0.865584	independent GO term
focal adhesion assembly	0.147727	0.763576	independent GO term
positive regulation of release of cytochrome c from mitochondria	0.181818	0.763576	independent GO term
activation of NF-kappaB-inducing kinase activity	0.1	0.755281	independent GO term
regulation of mitotic recombination	0.307692	0.751623	independent GO term
activation of MAPKKK activity	0.272727	0.751623	independent GO term
MAPK import into nucleus	0.285714	0.751623	independent GO term
regulation of transcription from RNA polymerase II promoter by glucose	0.222222	0.751623	independent GO term
DNA double-strand break processing	0.307692	0.751623	independent GO term
acetylcholine catabolic process in synaptic cleft	0	0.751623	independent GO term
eye photoreceptor cell differentiation	0.307692	0.751623	independent GO term
norepinephrine-epinephrine vasoconstriction involved in regulation of systemic arterial blood pressure	0.111111	0.751623	independent GO term
positive regulation of the force of heart contraction by epinephrine-norepinephrine	0	0.751623	independent GO term
vasodilation by norepinephrine-epinephrine involved in regulation of systemic arterial blood pressure	0	0.751623	independent GO term
desensitization of G-protein coupled receptor protein signaling pathway by arrestin	0.5	0.751623	dependent GO term
regulation of blood vessel size by renin-angiotensin	0.444444	0.751623	independent GO term
T-helper cell lineage commitment	0.157895	0.751623	independent GO term
immature B cell differentiation	0	0.751623	independent GO term
Factor XII activation	0.5	0.751623	independent GO term
regulation of glomerular filtration	0	0.751623	independent GO term
renal sodium ion transport	0.222222	0.751623	independent GO term
negative regulation of glomerular filtration	0	0.751623	dependent GO term
regulation of secondary heart field cardioblast proliferation	0.166667	0.751623	independent GO term
lactose biosynthetic process	0	0.751623	independent GO term
regulation of gluconeogenesis	0.16	0.751623	independent GO term
DNA replication, synthesis of RNA primer	0	0.751623	independent GO term
DNA replication-dependent nucleosome assembly	0.111111	0.751623	independent GO term
regulation of transcription from RNA polymerase III promoter	0.194444	0.751623	independent GO term
polyamine biosynthetic process	0	0.751623	dependent GO term
ribosomal protein import into nucleus	0	0.751623	independent GO term
protein retention in ER lumen	0.09375	0.751623	independent GO term
phosphatidylcholine biosynthetic process	0.2	0.751623	independent GO term
platelet activating factor biosynthetic process	0.333333	0.751623	dependent GO term
sphingosine metabolic process	0	0.751623	independent GO term
ganglioside catabolic process	0	0.751623	independent GO term
cholesterol catabolic process	0.230769	0.751623	independent GO term
biotin metabolic process	0	0.751623	independent GO term
Mo-molybdopterin cofactor biosynthetic process	0	0.751623	independent GO term
post-chaperonin tubulin folding pathway	0	0.751623	independent GO term
negative regulation of transcription from RNA polymerase II promoter during mitosis	0.176471	0.751623	independent GO term
activation of transmembrane receptor protein tyrosine kinase activity	0.5	0.751623	independent GO term
common-partner SMAD protein phosphorylation	0.347826	0.751623	independent GO term
adenylate cyclase-activating dopamine receptor signaling pathway	0.142857	0.751623	independent GO term
G-protein coupled receptor signaling pathway coupled to cGMP nucleotide second messenger	0	0.751623	independent GO term
phospholipase C-activating G-protein coupled glutamate receptor signaling pathway	0.125	0.751623	independent GO term
phospholipase C-activating G-protein coupled acetylcholine receptor signaling pathway	0.0833333	0.751623	dependent GO term
G-protein coupled acetylcholine receptor signaling pathway	0.0810811	0.751623	independent GO term
gamma-aminobutyric acid signaling pathway	0.130435	0.751623	independent GO term
cytoplasmic sequestering of NF-kappaB	0.115385	0.751623	dependent GO term
JUN phosphorylation	0.363636	0.751623	independent GO term
fusion of sperm to egg plasma membrane	0.5	0.751623	independent GO term
negative regulation of female receptivity	0	0.751623	independent GO term
retrograde axon cargo transport	0.1875	0.751623	independent GO term
sulfate transport	0	0.751623	independent GO term
hormone-mediated apoptotic signaling pathway	0.5	0.751623	independent GO term
deoxyribonucleoside diphosphate metabolic process	0.333333	0.751623	independent GO term
snRNA transcription	0	0.751623	independent GO term
proteasomal ubiquitin-independent protein catabolic process	0	0.751623	independent GO term
regulation of double-strand break repair via homologous recombination	0.176471	0.751623	dependent GO term
positive regulation of platelet-derived growth factor receptor signaling pathway	0.181818	0.751623	independent GO term
negative regulation of striated muscle cell apoptotic process	0.217391	0.751623	independent GO term
negative regulation of plasma membrane long-chain fatty acid transport	0.263158	0.751623	independent GO term
negative regulation of keratinocyte proliferation	0.0625	0.751623	independent GO term
negative regulation of receptor biosynthetic process	0.181818	0.751623	independent GO term
positive regulation of cholesterol esterification	0.176471	0.751623	independent GO term
positive regulation of heparan sulfate proteoglycan biosynthetic process	0.25	0.751623	independent GO term
negative regulation of macrophage cytokine production	0.5	0.751623	independent GO term
positive regulation of glutamate secretion	0	0.751623	independent GO term
skeletal myofibril assembly	0	0.751623	independent GO term
negative regulation of smooth muscle cell migration	0.346154	0.751623	dependent GO term
bile acid and bile salt transport	0.333333	0.751623	independent GO term
L-glutamate transport	0.35	0.751623	independent GO term
telomere capping	0.25	0.751623	independent GO term
cytidine to uridine editing	0	0.751623	independent GO term
protein import into peroxisome matrix, docking	0	0.751623	independent GO term
protein import into peroxisome matrix, translocation	0.0909091	0.751623	independent GO term
histone phosphorylation	0.142857	0.751623	independent GO term
Rac protein signal transduction	0.266667	0.751623	independent GO term
keratan sulfate biosynthetic process	0.357143	0.751623	independent GO term
peptidyl-arginine methylation	0.181818	0.751623	independent GO term
protein prenylation	0	0.751623	independent GO term
protein farnesylation	0.125	0.751623	dependent GO term
peptide cross-linking via chondroitin 4-sulfate glycosaminoglycan	0.375	0.751623	independent GO term
visceral motor neuron differentiation	0	0.751623	independent GO term
cerebral cortex tangential migration	0	0.751623	independent GO term
forebrain neuroblast division	0.130435	0.751623	independent GO term
convergent extension involved in neural plate elongation	0.125	0.751623	independent GO term
proteoglycan biosynthetic process	0	0.751623	independent GO term
monocyte differentiation	0.267857	0.751623	independent GO term
intestinal cholesterol absorption	0	0.751623	independent GO term
regulation of granulocyte differentiation	0.0754717	0.751623	independent GO term
positive regulation of granulocyte differentiation	0.0322581	0.751623	dependent GO term
regulation of histone methylation	0.181818	0.751623	independent GO term
negative regulation of histone methylation	0.25	0.751623	dependent GO term
neuron projection regeneration	0.227273	0.751623	independent GO term
regulation of myelination	0.117647	0.751623	independent GO term
positive regulation of cyclin-dependent protein serine/threonine kinase activity involved in G1/S transition of mitotic cell cycle	0.354839	0.751623	independent GO term
protection from non-homologous end joining at telomere	0.222222	0.751623	independent GO term
positive regulation of synaptic plasticity	0.3	0.751623	independent GO term
positive regulation of synaptic transmission, cholinergic	0.5	0.751623	independent GO term
peripheral nervous system myelin maintenance	0.2	0.751623	independent GO term
negative regulation of chondrocyte differentiation	0.147059	0.751623	independent GO term
negative regulation of protein homooligomerization	0.208333	0.751623	independent GO term
negative regulation of interleukin-1 beta production	0.1875	0.751623	independent GO term
negative regulation of ATPase activity	0	0.751623	dependent GO term
positive regulation of ATPase activity	0.08	0.751623	dependent GO term
negative regulation of epinephrine secretion	0.181818	0.751623	independent GO term
negative regulation of DNA endoreduplication	0.1	0.751623	independent GO term
negative regulation of intracellular estrogen receptor signaling pathway	0	0.751623	dependent GO term
positive regulation of protein import into nucleus, translocation	0.326087	0.751623	dependent GO term
fatty acid beta-oxidation using acyl-CoA oxidase	0.5	0.751623	independent GO term
positive regulation of NAD(P)H oxidase activity	0.5	0.751623	independent GO term
low-density lipoprotein particle remodeling	0.294118	0.751623	independent GO term
histone arginine methylation	0.181818	0.751623	independent GO term
negative regulation of protein dephosphorylation	0.0666667	0.751623	independent GO term
cellular response to interferon-beta	0.25	0.751623	independent GO term
mitochondrial protein catabolic process	0	0.751623	independent GO term
endothelial cell chemotaxis	0.222222	0.751623	independent GO term
negative regulation of renal sodium excretion	0	0.751623	independent GO term
cellular response to interleukin-3	0.0625	0.751623	independent GO term
cellular response to erythropoietin	0.0833333	0.751623	independent GO term
phosphatidylinositol-3-phosphate biosynthetic process	0.25	0.751623	independent GO term
alpha-linolenic acid metabolic process	0.5	0.751623	independent GO term
RNA (guanine-N7)-methylation	0	0.751623	independent GO term
protein localization to M-band	0	0.751623	independent GO term
opioid receptor signaling pathway	0.5	0.751623	independent GO term
interleukin-5-mediated signaling pathway	0	0.751623	independent GO term
interleukin-23-mediated signaling pathway	0.5	0.751623	independent GO term
interleukin-3-mediated signaling pathway	0	0.751623	independent GO term
erythropoietin-mediated signaling pathway	0	0.751623	dependent GO term
oncostatin-M-mediated signaling pathway	0	0.751623	independent GO term
B cell proliferation	0.12963	0.751623	independent GO term
cellular response to glucose starvation	0.216216	0.751623	independent GO term
heme catabolic process	0	0.751623	independent GO term
regulation of circadian sleep/wake cycle, REM sleep	0	0.751623	independent GO term
keratan sulfate catabolic process	0.304348	0.751623	independent GO term
positive regulation of odontogenesis	0.405405	0.751623	independent GO term
detection of triacyl bacterial lipopeptide	0.5	0.751623	independent GO term
detection of diacyl bacterial lipopeptide	0.333333	0.751623	independent GO term
negative regulation of tumor necrosis factor biosynthetic process	0.375	0.751623	independent GO term
glucocorticoid receptor signaling pathway	0.0882353	0.751623	independent GO term
neutrophil degranulation	0.0769231	0.751623	dependent GO term
natural killer cell degranulation	0	0.751623	dependent GO term
regulation of DNA methylation	0.208333	0.751623	independent GO term
negative regulation of interferon-gamma biosynthetic process	0.117647	0.751623	independent GO term
positive regulation of interleukin-12 biosynthetic process	0.0967742	0.751623	dependent GO term
cellular extravasation	0.333333	0.751623	independent GO term
positive regulation of interferon-beta biosynthetic process	0.214286	0.751623	independent GO term
regulation of interleukin-6 biosynthetic process	0.129032	0.751623	independent GO term
negative regulation of interleukin-6 biosynthetic process	0	0.751623	dependent GO term
positive regulation of interleukin-6 biosynthetic process	0.130435	0.751623	dependent GO term
positive regulation of interleukin-8 biosynthetic process	0.391304	0.751623	independent GO term
positive regulation of keratinocyte differentiation	0.0666667	0.751623	independent GO term
negative regulation of T-helper 1 cell differentiation	0.294118	0.751623	independent GO term
positive regulation of T-helper 2 cell differentiation	0.222222	0.751623	independent GO term
negative regulation of macrophage differentiation	0	0.751623	dependent GO term
regulation of myoblast differentiation	0.275862	0.751623	independent GO term
negative regulation of low-density lipoprotein particle receptor biosynthetic process	0.1	0.751623	dependent GO term
positive regulation of epidermal growth factor-activated receptor activity	0.413793	0.751623	dependent GO term
positive regulation of epidermal growth factor receptor signaling pathway	0.285714	0.751623	dependent GO term
negative regulation of Notch signaling pathway	0.125	0.751623	independent GO term
negative regulation of mitotic recombination	0.4	0.751623	dependent GO term
negative regulation of glucose import	0.304348	0.751623	dependent GO term
platelet activating factor metabolic process	0.111111	0.751623	independent GO term
S-adenosylmethionine metabolic process	0	0.751623	independent GO term
positive regulation of insulin receptor signaling pathway	0.111111	0.751623	independent GO term
vesicle fusion with Golgi apparatus	0.0833333	0.751623	independent GO term
positive regulation of retinoic acid receptor signaling pathway	0.181818	0.751623	independent GO term
negative regulation of oligodendrocyte differentiation	0.0769231	0.751623	independent GO term
cardiac muscle fiber development	0.263158	0.751623	independent GO term
sarcomerogenesis	0.5	0.751623	independent GO term
negative regulation of cytokine secretion	0.189189	0.751623	independent GO term
negative regulation of lipoprotein metabolic process	0.1	0.751623	independent GO term
positive regulation of dendrite morphogenesis	0.0952381	0.751623	independent GO term
regulation of B cell receptor signaling pathway	0.0243902	0.751623	independent GO term
barbed-end actin filament capping	0.238095	0.751623	independent GO term
negative regulation of neurotrophin TRK receptor signaling pathway	0.5	0.751623	independent GO term
negative regulation of histone H3-K9 methylation	0.333333	0.751623	dependent GO term
positive regulation of fibrinolysis	0.4	0.751623	independent GO term
positive regulation of telomerase activity	0	0.751623	independent GO term
negative regulation of telomerase activity	0.238095	0.751623	independent GO term
regulation of attachment of spindle microtubules to kinetochore	0.269231	0.751623	independent GO term
Bergmann glial cell differentiation	0.222222	0.751623	independent GO term
synaptic transmission involved in micturition	0	0.751623	independent GO term
positive regulation of growth hormone secretion	0	0.751623	independent GO term
lens induction in camera-type eye	0.1	0.751623	independent GO term
positive regulation of transcription initiation from RNA polymerase II promoter	0.166667	0.751623	independent GO term
positive regulation of type I interferon-mediated signaling pathway	0.5	0.751623	independent GO term
positive regulation of cardiac muscle contraction	0.3	0.751623	independent GO term
Clara cell differentiation	0.0909091	0.751623	independent GO term
Type II pneumocyte differentiation	0.166667	0.751623	independent GO term
positive regulation of vitamin D biosynthetic process	0.6	0.751623	independent GO term
positive regulation of calcidiol 1-monooxygenase activity	0.6	0.751623	independent GO term
negative regulation of mitotic anaphase-promoting complex activity	0.333333	0.751623	independent GO term
regulation of branching involved in salivary gland morphogenesis by mesenchymal-epithelial signaling	0.272727	0.751623	independent GO term
branch elongation involved in salivary gland morphogenesis	0	0.751623	independent GO term
branch elongation involved in mammary gland duct branching	0.5	0.751623	independent GO term
mesenchymal cell differentiation involved in lung development	0	0.751623	independent GO term
neuroendocrine cell differentiation	0.318182	0.751623	independent GO term
BMP signaling pathway involved in heart development	0.166667	0.751623	independent GO term
negative regulation of transcription from RNA polymerase II promoter in response to hypoxia	0.25	0.751623	independent GO term
chaperone cofactor-dependent protein refolding	0.181818	0.751623	dependent GO term
nucleotide-binding oligomerization domain containing 2 signaling pathway	0.08	0.751623	independent GO term
regulation of centromeric sister chromatid cohesion	0.25	0.751623	independent GO term
CUT catabolic process	0.0526316	0.751623	independent GO term
protein localization to chromatin	0.166667	0.751623	independent GO term
cellular response to bacterial lipopeptide	0.166667	0.751623	independent GO term
cellular response to peptidoglycan	0.235294	0.751623	independent GO term
cellular response to epidermal growth factor stimulus	0.147059	0.751623	independent GO term
cellular response to diacyl bacterial lipopeptide	0.333333	0.751623	dependent GO term
cellular response to triacyl bacterial lipopeptide	0.5	0.751623	dependent GO term
positive regulation of fever generation by positive regulation of prostaglandin secretion	0.5	0.751623	independent GO term
TNFSF11-mediated signaling pathway	0.5	0.751623	independent GO term
cellular response to catecholamine stimulus	0.142857	0.751623	independent GO term
glomerular visceral epithelial cell differentiation	0.5	0.751623	independent GO term
metanephric loop of Henle development	0	0.751623	independent GO term
minus-end-directed organelle transport along microtubule	0	0.751623	independent GO term
negative regulation of establishment of protein localization to plasma membrane	0.277778	0.751623	independent GO term
negative regulation of cell migration involved in sprouting angiogenesis	0.0909091	0.751623	dependent GO term
negative regulation of calcium ion import	0	0.751623	independent GO term
positive regulation of cytokine production involved in inflammatory response	0	0.751623	independent GO term
semaphorin-plexin signaling pathway involved in bone trabecula morphogenesis	0	0.751623	independent GO term
negative regulation of protein homotetramerization	0.0909091	0.751623	dependent GO term
positive regulation of ERBB signaling pathway	0.255319	0.751623	independent GO term
negative regulation of hydrogen peroxide-mediated programmed cell death	0.285714	0.751623	independent GO term
regulation of potassium ion transmembrane transport	0.0606061	0.751623	independent GO term
regulation of protein ubiquitination involved in ubiquitin-dependent protein catabolic process	0.211538	0.751623	independent GO term
positive regulation of protein ubiquitination involved in ubiquitin-dependent protein catabolic process	0.232558	0.751623	dependent GO term
regulation of smooth muscle cell-matrix adhesion	0.5	0.751623	independent GO term
positive regulation of actin cytoskeleton reorganization	0.157895	0.751623	independent GO term
positive regulation of gastrulation	0.0833333	0.751623	independent GO term
negative regulation of dendritic cell apoptotic process	0	0.751623	independent GO term
positive regulation of mesenchymal stem cell differentiation	0	0.751623	independent GO term
regulation of double-strand break repair	0.136364	0.751623	independent GO term
positive regulation of vasculogenesis	0	0.751623	independent GO term
regulation of glucose import in response to insulin stimulus	0.3	0.751623	independent GO term
positive regulation of glucose import in response to insulin stimulus	0.272727	0.751623	dependent GO term
negative regulation of insulin receptor signaling pathway	0.116667	0.71708	independent GO term
protein refolding	0.191489	0.710964	independent GO term
ventricular cardiac muscle cell differentiation	0.0666667	0.710964	dependent GO term
JAK-STAT cascade involved in growth hormone signaling pathway	0.287356	0.692799	independent GO term
positive regulation of epithelial to mesenchymal transition	0.258065	0.665245	dependent GO term
DNA replication checkpoint	0.285714	0.651624	independent GO term
carnitine shuttle	0	0.651624	independent GO term
SMAD protein import into nucleus	0.241379	0.651624	independent GO term
I-kappaB phosphorylation	0.193548	0.651624	independent GO term
peptidyl-lysine modification to hypusine	0	0.651624	independent GO term
potassium ion import	0.166667	0.651624	independent GO term
negative regulation of glucose transport	0.222222	0.651624	independent GO term
rRNA catabolic process	0.136364	0.651624	independent GO term
negative regulation of B cell proliferation	0.16	0.651624	dependent GO term
positive regulation of intracellular estrogen receptor signaling pathway	0.242424	0.651624	dependent GO term
regulation of protein import into nucleus, translocation	0.290909	0.651624	independent GO term
mitochondrial ATP synthesis coupled electron transport	0	0.651624	independent GO term
mast cell degranulation	0	0.651624	dependent GO term
positive regulation of macrophage differentiation	0.194444	0.651624	independent GO term
positive regulation of axon extension	0.212121	0.651624	independent GO term
positive regulation of calcium ion-dependent exocytosis	0.3	0.651624	dependent GO term
pyrimidine nucleoside biosynthetic process	0.263158	0.651624	independent GO term
phosphatidylinositol phosphorylation	0.190476	0.651624	independent GO term
positive regulation of follicle-stimulating hormone secretion	0	0.651624	independent GO term
positive regulation of cardioblast differentiation	0	0.651624	independent GO term
negative regulation of cell cycle arrest	0.304348	0.651624	independent GO term
spindle assembly involved in mitosis	0.27027	0.651624	independent GO term
signal complex assembly	0.14	0.607989	independent GO term
regulation of smooth muscle cell migration	0.25	0.607989	independent GO term
regulation of interferon-gamma-mediated signaling pathway	0.238806	0.575343	independent GO term
positive regulation of cell morphogenesis involved in differentiation	0.221053	0.56964	independent GO term
regulation of blood volume by renin-angiotensin	0.166667	0.564928	independent GO term
desensitization of G-protein coupled receptor protein signaling pathway	0.2	0.564928	independent GO term
polyamine metabolic process	0	0.564928	independent GO term
DNA damage induced protein phosphorylation	0.206897	0.564928	independent GO term
attachment of GPI anchor to protein	0.3	0.564928	independent GO term
macrophage differentiation	0.137931	0.564928	independent GO term
positive regulation of intracellular steroid hormone receptor signaling pathway	0.236842	0.564928	independent GO term
5S class rRNA transcription from RNA polymerase III type 1 promoter	0	0.564928	dependent GO term
tRNA transcription from RNA polymerase III promoter	0	0.564928	dependent GO term
regulation of translation in response to stress	0.157895	0.564928	independent GO term
platelet-derived growth factor receptor signaling pathway	0.195402	0.563852	independent GO term
positive regulation of glucose import	0.131579	0.491579	independent GO term
glycogen biosynthetic process	0.228571	0.489764	independent GO term
pyrimidine nucleobase catabolic process	0	0.489764	dependent GO term
regulation of gene expression by genetic imprinting	0.28	0.489764	independent GO term
telomere maintenance via telomerase	0.222222	0.489764	independent GO term
regulation of epidermal growth factor-activated receptor activity	0.315789	0.489764	independent GO term
olfactory bulb interneuron differentiation	0.5	0.489764	independent GO term
positive regulation of transforming growth factor beta receptor signaling pathway	0.21875	0.489764	independent GO term
regulation of ATPase activity	0.0789474	0.489764	independent GO term
negative regulation of JNK cascade	0.108696	0.489764	dependent GO term
leukemia inhibitory factor signaling pathway	0	0.489764	independent GO term
regulation of SMAD protein import into nucleus	0.152174	0.489764	independent GO term
positive regulation of SMAD protein import into nucleus	0.166667	0.489764	dependent GO term
mammary gland branching involved in pregnancy	0.0909091	0.489764	independent GO term
histone mRNA catabolic process	0.0714286	0.489764	dependent GO term
cellular response to indole-3-methanol	0.2	0.489764	independent GO term
regulation of platelet aggregation	0.05	0.489764	independent GO term
SCF-dependent proteasomal ubiquitin-dependent protein catabolic process	0.2	0.468119	independent GO term
negative regulation of stress-activated MAPK cascade	0.132075	0.424598	independent GO term
regulation of intracellular estrogen receptor signaling pathway	0.229167	0.424598	independent GO term
leukocyte degranulation	0.0701754	0.424598	independent GO term
negative regulation of blood vessel endothelial cell migration	0.390244	0.424598	independent GO term
regulation of interleukin-12 biosynthetic process	0.128205	0.424598	independent GO term
growth hormone receptor signaling pathway	0.297297	0.399669	independent GO term
COPI-coated vesicle budding	0	0.387885	independent GO term
pathway-restricted SMAD protein phosphorylation	0.222222	0.387885	independent GO term
DNA recombinase assembly	0	0.368102	independent GO term
pyrimidine nucleobase metabolic process	0.1875	0.368102	independent GO term
tRNA transcription	0	0.368102	independent GO term
regulation of Rac protein signal transduction	0.125	0.368102	independent GO term
ventricular cardiac muscle tissue development	0	0.351899	independent GO term
positive regulation of glycogen biosynthetic process	0.230769	0.319122	dependent GO term
regulation of glycogen biosynthetic process	0.216216	0.31862	independent GO term
histone mRNA metabolic process	0.0925926	0.31862	independent GO term
regulation of heart rate by cardiac conduction	0.157895	0.276658	independent GO term
tachykinin receptor signaling pathway	0	0.239844	independent GO term
protein import into peroxisome matrix	0.117647	0.239844	independent GO term
cilium morphogenesis	0.230769	0.239844	independent GO term
DNA damage response, signal transduction by p53 class mediator resulting in transcription of p21 class mediator	0.27027	0.180257	independent GO term
rRNA transcription	0.227273	0.180257	independent GO term
protein localization to endoplasmic reticulum	0	0.156268	independent GO term
neural crest cell development	0.138889	0.135472	independent GO term
cardiac muscle cell differentiation	0.121951	0.102911	independent GO term
formation of translation preinitiation complex	0.15	0.0498472	independent GO term
mitotic G1 DNA damage checkpoint	0.192308	0.000316201	dependent GO term
negative regulation of G1/S transition of mitotic cell cycle	0.145161	5.71845e-05	independent GO term
protein localization to nucleus	0.232877	7.75456e-06	independent GO term
