# Supplementary material for: Network stratification analysis for identifying function-specific network layers
Source: Royal Society of Chemistry journal article supplement (doi:10.1039/c5mb00782h), 2016-02-08
Supplement: c5mb00782h1.zip [file Supplementary_Table_S4.xlsx]

## Sheet: normal
GO terms	Significance p-value	diseae enrichment ratio	GO term type
vesicle targeting	1.22e-10	0.142857	independent GO term
cell cycle	1.17e-09	0.181818	independent GO term
cell cycle process	1.1e-08	0.181818	independent GO term
rhythmic process	5.48e-08	0	independent GO term
regulation of reproductive process	6.54e-08	0	independent GO term
regulation of multi-organism process	2.09e-07	0	independent GO term
regulation of transmembrane receptor protein serine/threonine kinase signaling pathway	4.1e-07	0.166667	independent GO term
drug metabolic process	3e-06	0.75	independent GO term
regulation of fibrinolysis	4.77e-06	0.166667	independent GO term
keratinization	5.4e-06	0	independent GO term
regulation of fibrinolysis	9.05e-06	0.571429	independent GO term
coagulation	1.23e-05	0.6	independent GO term
biological adhesion	1.75e-05	0	independent GO term
chromosome segregation	1.91e-05	0	independent GO term
regulation of transmembrane receptor protein serine/threonine kinase signaling pathway	3.09e-05	0	independent GO term
translational initiation	3.36e-05	0	independent GO term
dermatome development	4.4e-05	0	independent GO term
intermediate filament-based process	4.63e-05	0	independent GO term
fatty acid derivative metabolic process	4.77e-05	0.75	independent GO term
regulation of cellular response to growth factor stimulus	5.34e-05	0.166667	independent GO term
pigmentation	5.93e-05	0	independent GO term
cellular response to stress	7.18e-05	0	independent GO term
regulation of cell cycle	8.04e-05	0	independent GO term
regulation of intracellular steroid hormone receptor signaling pathway	0.000108	0.166667	independent GO term
glomerulus development	0.000121	0	independent GO term
response to wounding	0.000162	0.555556	independent GO term
regulation of signal transduction by p53 class mediator	0.000162	0	independent GO term
multi-organism process	0.000173	0	independent GO term
multicellular organismal metabolic process	0.000181	0.333333	independent GO term
ossification	0.00022	0	independent GO term
tissue development	0.000231	0.166667	independent GO term
biosynthetic process	0.000257	0.05	independent GO term
xenobiotic metabolic process	0.000281	0.75	independent GO term
xenobiotic metabolic process	0.000281	0	independent GO term
response to xenobiotic stimulus	0.000307	0.75	independent GO term
response to xenobiotic stimulus	0.000307	0	independent GO term
regulation of cytokine production	0.00031	0.2	independent GO term
coagulation	0.000319	0.571429	independent GO term
actin filament-based process	0.000358	0	independent GO term
replicative cell aging	0.000379	0.6	independent GO term
regulation of cholesterol homeostasis	0.000379	0	independent GO term
cell recognition	0.000454	0.2	independent GO term
translational initiation	0.00046	0	independent GO term
regulation of synaptic transmission	0.00046	0	independent GO term
cytokine production	0.000462	0.2	independent GO term
heterocycle metabolic process	0.000509	0.05	independent GO term
cellular aromatic compound metabolic process	0.000524	0.05	independent GO term
regulation of hemostasis	0.000543	0.166667	independent GO term
establishment or maintenance of cell polarity	0.000625	0	independent GO term
nephron development	0.000687	0	independent GO term
cell cycle process	0.000712	0	independent GO term
regulation of coagulation	0.000714	0.166667	independent GO term
skeletal system development	0.000794	0	independent GO term
cellular response to stress	0.000807	0	independent GO term
response to wounding	0.000816	0.6	independent GO term
sulfation	0.00088	0	independent GO term
multicellular organismal metabolic process	0.000908	0.5	independent GO term
organic cyclic compound metabolic process	0.000921	0.05	independent GO term
coagulation	0.000927	0	independent GO term
regulation of hemostasis	0.00103	0.571429	independent GO term
palate development	0.00103	0.166667	independent GO term
phosphorus metabolic process	0.00105	0.555556	independent GO term
regulation of cell death	0.00114	0	independent GO term
pattern specification process	0.00117	0	independent GO term
pattern specification process	0.00117	0	independent GO term
regulation of behavior	0.00122	0.25	independent GO term
cellular response to chemical stimulus	0.00123	0.333333	independent GO term
cellular component biogenesis	0.00123	0	independent GO term
cellular component biogenesis	0.00123	0	independent GO term
establishment of localization	0.00124	0	independent GO term
response to biotic stimulus	0.00124	0.2	independent GO term
regulation of coagulation	0.00135	0.571429	independent GO term
cellular response to stress	0.00136	0	independent GO term
cellular response to stress	0.00136	0.6	independent GO term
tube development	0.00142	0	independent GO term
dendritic spine development	0.00144	0.333333	independent GO term
biosynthetic process	0.0015	0.181818	independent GO term
regulation of cell cycle	0.00165	0	independent GO term
regulation of cell cycle	0.00165	0.25	independent GO term
biological adhesion	0.00167	0.333333	independent GO term
reproductive process	0.00175	0	independent GO term
blood vessel development	0.00175	0	independent GO term
cell division	0.00184	0	independent GO term
response to wounding	0.00186	0	independent GO term
regulation of cell cycle	0.00204	0	independent GO term
regulation of cell cycle	0.00204	0	independent GO term
embryo development	0.0021	0.166667	independent GO term
anatomical structure morphogenesis	0.00214	0.333333	independent GO term
vasculature development	0.00216	0	independent GO term
response to organic substance	0.00228	0.333333	independent GO term
nitrogen compound metabolic process	0.00229	0.05	independent GO term
translational initiation	0.00231	0	independent GO term
detection of stimulus	0.00233	0.666667	independent GO term
response to inorganic substance	0.00235	0	independent GO term
growth	0.00236	0	independent GO term
heterocycle metabolic process	0.00245	0.181818	independent GO term
tissue development	0.00246	0	independent GO term
cellular aromatic compound metabolic process	0.0025	0.181818	independent GO term
establishment of localization	0.0025	0	independent GO term
multi-organism process	0.00256	0	independent GO term
multi-organism process	0.00256	0	independent GO term
cell cycle	0.00264	0	independent GO term
regulation of metabolic process	0.00291	0	independent GO term
regulation of intracellular steroid hormone receptor signaling pathway	0.00297	0	independent GO term
reproduction	0.00306	0	independent GO term
regulation of response to stress	0.00317	0.2	independent GO term
response to drug	0.00325	0.75	independent GO term
regulation of ERBB signaling pathway	0.00339	0.2	independent GO term
response to endogenous stimulus	0.00355	0.555556	independent GO term
regulation of cardiac muscle cell action potential	0.00364	0	independent GO term
response to endogenous stimulus	0.00371	0.166667	independent GO term
organic cyclic compound metabolic process	0.00376	0.181818	independent GO term
appendage development	0.00379	0	independent GO term
cochlea development	0.00411	0	independent GO term
pharyngeal system development	0.00454	0	independent GO term
biological adhesion	0.00457	0.25	independent GO term
regulation of actin filament-based process	0.00481	0	independent GO term
skeletal system development	0.00495	0	independent GO term
regulation of ossification	0.00502	0	independent GO term
response to nitrogen compound	0.0053	0.166667	independent GO term
cellular response to chemical stimulus	0.00538	0.555556	independent GO term
gene expression	0.00563	0.05	independent GO term
replicative senescence	0.00564	0	independent GO term
phosphorus metabolic process	0.00566	0.166667	independent GO term
regulation of cellular response to insulin stimulus	0.00572	0	independent GO term
vesicle targeting	0.00572	0	independent GO term
vesicle targeting	0.00572	0	independent GO term
vesicle targeting	0.00572	0	independent GO term
regulation of locomotion	0.00578	0.166667	independent GO term
plasma lipoprotein particle clearance	0.00601	0.333333	independent GO term
regulation of small GTPase mediated signal transduction	0.00604	0.285714	independent GO term
phosphorus metabolic process	0.00648	0.333333	independent GO term
thioester metabolic process	0.00654	0	independent GO term
death	0.00664	0	independent GO term
regulation of cell activation	0.00668	0	independent GO term
bone development	0.00687	0.285714	independent GO term
regulation of Notch signaling pathway	0.00693	0	independent GO term
cellular aldehyde metabolic process	0.00693	0.666667	independent GO term
sympathetic nervous system development	0.007	0	independent GO term
translational initiation	0.00702	0	independent GO term
organic hydroxy compound metabolic process	0.00706	0	independent GO term
nitrogen compound metabolic process	0.00728	0.181818	independent GO term
regulation of cell proliferation	0.0075	0.555556	independent GO term
regulation of system process	0.00754	0	independent GO term
tube development	0.00768	0	independent GO term
tube development	0.00768	0	independent GO term
regulation of cell death	0.00772	0.333333	independent GO term
peripheral nervous system development	0.00799	0.555556	independent GO term
microtubule-based process	0.00814	0	independent GO term
microtubule-based process	0.00814	0	independent GO term
regulation of molecular function	0.00821	0	independent GO term
superoxide metabolic process	0.00826	0.333333	independent GO term
regulation of cell adhesion	0.0084	0	independent GO term
macromolecule modification	0.00845	0.166667	independent GO term
regulation of immune system process	0.00865	0.555556	independent GO term
locomotion	0.00883	0	independent GO term
blood vessel development	0.00897	0	independent GO term
demethylation	0.00898	0.75	independent GO term
muscle structure development	0.00913	0	independent GO term
muscle structure development	0.00913	0	independent GO term
cell division	0.00933	0	independent GO term
cell division	0.00933	0.333333	independent GO term
cell division	0.00933	0.333333	independent GO term
cell division	0.00933	0.333333	independent GO term
regulation of cytokine production	0.00938	0.25	independent GO term
cell cycle process	0.00945	0	independent GO term
cell cycle process	0.00945	0.2	independent GO term
cell cycle process	0.00945	0.25	independent GO term
regulation of glutamate receptor signaling pathway	0.00956	0	independent GO term
molting cycle process	0.00973	0.222222	independent GO term
cellular component biogenesis	0.00988	0	independent GO term
negative regulation of biological process	0.00989	0.181818	independent GO term
response to organic substance	0.00991	0.555556	independent GO term
localization	0.00996	0	independent GO term
regulation of smoothened signaling pathway	0.0101	0	independent GO term
regulation of metabolic process	0.0102	0	independent GO term
tissue migration	0.0102	0.166667	independent GO term
tissue migration	0.0102	0.166667	independent GO term
actin filament-based process	0.0105	0.333333	independent GO term
actin filament-based process	0.0105	0	independent GO term
actin filament-based process	0.0105	0	independent GO term
vasculature development	0.0105	0	independent GO term
coagulation	0.0107	0	independent GO term
lipid metabolic process	0.0109	0.25	independent GO term
circulatory system development	0.0115	0	independent GO term
cardiovascular system development	0.0115	0	independent GO term
regulation of reproductive process	0.0116	0	independent GO term
response to external stimulus	0.0116	0.166667	independent GO term
response to inorganic substance	0.0117	0.25	independent GO term
behavior	0.0117	0	independent GO term
behavior	0.0117	0	independent GO term
behavior	0.0117	0	independent GO term
molting cycle	0.012	0.222222	independent GO term
localization	0.0122	0	independent GO term
respiratory burst	0.0123	0	independent GO term
multicellular organismal metabolic process	0.0124	0.125	independent GO term
cytokine production	0.0127	0.25	independent GO term
regulation of growth	0.0127	0	independent GO term
regulation of cell proliferation	0.0128	0	independent GO term
generation of precursor metabolites and energy	0.0129	0	independent GO term
regulation of response to stress	0.013	0.333333	independent GO term
membrane docking	0.0137	0.25	independent GO term
regulation of response to cytokine stimulus	0.0137	0.333333	independent GO term
cellular macromolecule metabolic process	0.0138	0.05	independent GO term
regulation of cell death	0.0138	0.25	independent GO term
regulation of cell death	0.0138	0.25	independent GO term
regulation of immune system process	0.0141	0.2	independent GO term
locomotion	0.0143	0.5	independent GO term
locomotion	0.0143	0	independent GO term
regulation of cellular response to insulin stimulus	0.0144	0.75	independent GO term
oxidation-reduction process	0.0145	0.75	independent GO term
immune system process	0.0146	0	independent GO term
immune system process	0.0146	0.555556	independent GO term
signal transduction	0.0146	0	independent GO term
regulation of plasma lipoprotein particle levels	0.0148	0.333333	independent GO term
regulation of localization	0.0152	0.166667	independent GO term
lens development in camera-type eye	0.0152	0	independent GO term
lens development in camera-type eye	0.0152	0	independent GO term
cellular response to stress	0.0158	0	independent GO term
cellular response to stress	0.0158	0.2	independent GO term
cellular response to stress	0.0158	0	independent GO term
cellular response to stress	0.0158	0.25	independent GO term
cellular response to stress	0.0158	0.25	independent GO term
regulation of organelle organization	0.0158	0.333333	independent GO term
positive regulation of biological process	0.0162	0	independent GO term
biosynthetic process	0.0164	0	independent GO term
cellular component movement	0.0165	0	independent GO term
circulatory system development	0.0166	0.555556	independent GO term
cardiovascular system development	0.0166	0.555556	independent GO term
renal system development	0.0168	0	independent GO term
catabolic process	0.017	0	independent GO term
cell cycle process	0.0174	0	independent GO term
cell cycle process	0.0174	0	independent GO term
nerve development	0.0177	0	independent GO term
cell activation	0.0178	0.6	independent GO term
anatomical structure formation involved in morphogenesis	0.018	0	independent GO term
diencephalon development	0.0182	0	independent GO term
diencephalon development	0.0182	0	independent GO term
cellular developmental process	0.0183	0.166667	independent GO term
cellular developmental process	0.0183	0.166667	independent GO term
actin filament-based process	0.0186	0	independent GO term
actin filament-based process	0.0186	0.285714	independent GO term
somite development	0.0187	0	independent GO term
replicative senescence	0.0197	0.0909091	independent GO term
response to wounding	0.0199	0.571429	independent GO term
reproductive system development	0.0204	0.166667	independent GO term
reproductive system development	0.0204	0	independent GO term
regulation of multi-organism process	0.0206	0	independent GO term
response to nitrogen compound	0.0207	0	independent GO term
cerebral cortex development	0.0209	0	independent GO term
regulation of biological quality	0.0215	0	independent GO term
regulation of developmental process	0.0215	0.166667	independent GO term
regulation of cellular component biogenesis	0.0215	0	independent GO term
immune system process	0.022	0	independent GO term
cellular component movement	0.022	0	independent GO term
cellular component movement	0.022	0.5	independent GO term
regulation of circadian rhythm	0.0225	0	independent GO term
regulation of protein complex disassembly	0.0226	0	independent GO term
regulation of JAK-STAT cascade	0.0226	0	independent GO term
autonomic nervous system development	0.0236	0	independent GO term
blastocyst development	0.0237	0	independent GO term
blastocyst development	0.0237	0.333333	independent GO term
neural retina development	0.0238	0	independent GO term
skeletal system development	0.0246	0	independent GO term
skeletal system development	0.0246	0	independent GO term
cellular developmental process	0.0248	0	independent GO term
tissue development	0.0255	0	independent GO term
multicellular organismal metabolic process	0.0256	0	independent GO term
regulation of glutamate receptor signaling pathway	0.0259	0	independent GO term
urogenital system development	0.0262	0	independent GO term
multi-organism process	0.0263	0.2	independent GO term
multi-organism process	0.0263	0.25	independent GO term
response to biotic stimulus	0.0265	0	independent GO term
response to biotic stimulus	0.0265	0	independent GO term
protein metabolic process	0.0267	0.142857	independent GO term
cell cycle	0.027	0	independent GO term
cell cycle	0.027	0.2	independent GO term
cell cycle	0.027	0.25	independent GO term
cellular macromolecule metabolic process	0.0272	0.181818	independent GO term
cellular macromolecule metabolic process	0.0272	0.181818	independent GO term
cell proliferation	0.0275	0.166667	independent GO term
regulation of cell death	0.0276	0	independent GO term
regulation of G-protein coupled receptor protein signaling pathway	0.0278	0.25	independent GO term
embryo development	0.0283	0	independent GO term
cell activation	0.0284	0	independent GO term
oxidation-reduction process	0.0284	0	independent GO term
central nervous system development	0.0285	0	independent GO term
central nervous system development	0.0285	0	independent GO term
multicellular organismal aging	0.0294	0.142857	independent GO term
ensheathment of neurons	0.03	0	independent GO term
defense response	0.0308	0.555556	independent GO term
response to oxygen-containing compound	0.031	0.333333	independent GO term
regulation of synaptic transmission	0.0313	0	independent GO term
signal transduction	0.0314	0	independent GO term
regulation of developmental process	0.0316	0	independent GO term
signaling	0.0327	0	independent GO term
cellular response to stress	0.0327	0	independent GO term
regulation of cell cycle	0.0329	0.333333	independent GO term
regulation of cell cycle	0.0329	0	independent GO term
regulation of cell cycle	0.0329	0	independent GO term
regulation of cell cycle	0.0329	0.333333	independent GO term
regulation of cell cycle	0.0329	0.333333	independent GO term
hepaticobiliary system development	0.0334	0	independent GO term
defense response	0.0338	0.2	independent GO term
regulation of cell cycle	0.034	0.333333	independent GO term
hydrogen peroxide metabolic process	0.0341	0.166667	independent GO term
cellular component biogenesis	0.0344	0.125	independent GO term
regulation of cytokine production	0.0352	0	independent GO term
response to inorganic substance	0.0355	0.6	independent GO term
system process	0.0361	0	independent GO term
circulatory system development	0.037	0	independent GO term
cardiovascular system development	0.037	0	independent GO term
circulatory system development	0.037	0	independent GO term
cardiovascular system development	0.037	0	independent GO term
circulatory system development	0.037	0	independent GO term
cardiovascular system development	0.037	0	independent GO term
cellular process involved in reproduction	0.0372	0.2	independent GO term
gene expression	0.0374	0	independent GO term
cell proliferation	0.0374	0.555556	independent GO term
response to endogenous stimulus	0.0379	0.333333	independent GO term
response to oxygen-containing compound	0.0379	0.166667	independent GO term
tube development	0.0381	0	independent GO term
tube development	0.0381	0	independent GO term
organ development	0.0386	0.2	independent GO term
organ development	0.0386	0	independent GO term
cell proliferation	0.0387	0	independent GO term
cell communication	0.039	0	independent GO term
regulation of response to external stimulus	0.0392	0.25	independent GO term
regeneration	0.0392	0.25	independent GO term
circulatory system development	0.0397	0.166667	independent GO term
cardiovascular system development	0.0397	0.166667	independent GO term
microtubule-based process	0.0404	0	independent GO term
response to external stimulus	0.0411	0.571429	independent GO term
regulation of response to cytokine stimulus	0.0415	0.25	independent GO term
superoxide metabolic process	0.0425	0	independent GO term
regulation of locomotion	0.0425	0	independent GO term
regulation of locomotion	0.0425	0.5	independent GO term
retina development in camera-type eye	0.043	0.666667	independent GO term
growth	0.0431	0	independent GO term
negative regulation of biological process	0.0432	0	independent GO term
macromolecule modification	0.0434	0.555556	independent GO term
death	0.0437	0.333333	independent GO term
death	0.0437	0.166667	independent GO term
small molecule metabolic process	0.0441	0	independent GO term
blood vessel development	0.0445	0	independent GO term
response to endogenous stimulus	0.0446	0.166667	independent GO term
response to endogenous stimulus	0.0446	0	independent GO term
nerve development	0.0446	0	independent GO term
response to nitrogen compound	0.0453	0	independent GO term
positive regulation of biological process	0.0458	0.05	independent GO term
regulation of transmembrane receptor protein serine/threonine kinase signaling pathway	0.0458	0.333333	independent GO term
pallium development	0.0463	0	independent GO term
response to abiotic stimulus	0.0477	0.333333	independent GO term
response to abiotic stimulus	0.0477	0.666667	independent GO term
cellular component organization	0.048	0.125	independent GO term
system process	0.0482	0.25	independent GO term
growth	0.0483	0.166667	independent GO term
macromolecule modification	0.0494	0	independent GO term
cellular alkene metabolic process	0.05	0	independent GO term
regulation of ephrin receptor signaling pathway	0.05	0	independent GO term
olfactory nerve structural organization	0.05	0	independent GO term
DNA replication	7.09e-18	0.181818	dependent GO term
G1/S transition of mitotic cell cycle	8.95e-16	0.181818	dependent GO term
interphase	4.62e-15	0.181818	dependent GO term
cell cycle phase	1.73e-14	0.181818	dependent GO term
mitotic cell cycle phase transition	3.53e-13	0.181818	dependent GO term
Golgi transport vesicle coating	3.7e-13	0.142857	dependent GO term
COPI-coated vesicle budding	3.7e-13	0.142857	dependent GO term
COPI coating of Golgi vesicle	3.7e-13	0.142857	dependent GO term
Golgi vesicle budding	5.55e-13	0.142857	dependent GO term
7-methylguanosine mRNA capping	7.04e-13	0	dependent GO term
RNA capping	1.16e-12	0	dependent GO term
7-methylguanosine RNA capping	1.16e-12	0	dependent GO term
mitotic cell cycle	1.61e-12	0.181818	dependent GO term
cell cycle phase transition	1.92e-12	0.181818	dependent GO term
DNA replication initiation	2.83e-12	0.181818	dependent GO term
adherens junction organization	6.84e-12	0	dependent GO term
DNA strand elongation involved in DNA replication	9.66e-12	0.181818	dependent GO term
DNA metabolic process	9.83e-12	0.181818	dependent GO term
transcription-coupled nucleotide-excision repair	1.1e-11	0	dependent GO term
DNA strand elongation	1.64e-11	0.181818	dependent GO term
vesicle targeting, to, from or within Golgi	1.82e-11	0.142857	dependent GO term
positive regulation of viral transcription	3.02e-11	0	dependent GO term
retrograde vesicle-mediated transport, Golgi to ER	3.14e-11	0.142857	dependent GO term
homophilic cell adhesion	8.41e-11	0	dependent GO term
regulation of viral transcription	9.79e-11	0	dependent GO term
positive regulation of viral process	1.42e-10	0	dependent GO term
vesicle coating	1.57e-10	0.142857	dependent GO term
spliceosomal snRNP assembly	1.78e-10	0	dependent GO term
positive regulation of multi-organism process	2.01e-10	0	dependent GO term
nucleotide-excision repair	2.15e-10	0	dependent GO term
transcription elongation from RNA polymerase II promoter	2.15e-10	0	dependent GO term
membrane budding	2.83e-10	0.142857	dependent GO term
pathway-restricted SMAD protein phosphorylation	2.83e-10	0.166667	dependent GO term
nucleotide-excision repair, DNA gap filling	4.22e-10	0.2	dependent GO term
regulation of cellular amino acid metabolic process	4.46e-10	0	dependent GO term
extracellular matrix organization	5.33e-10	0.125	dependent GO term
extracellular structure organization	5.43e-10	0.125	dependent GO term
cell junction assembly	5.77e-10	0	dependent GO term
cell-cell junction organization	5.95e-10	0	dependent GO term
exonucleolytic nuclear-transcribed mRNA catabolic process involved in deadenylation-dependent decay	7.84e-10	0	dependent GO term
negative regulation of ubiquitin-protein ligase activity involved in mitotic cell cycle	8.48e-10	0	dependent GO term
signal transduction involved in mitotic cell cycle checkpoint	8.48e-10	0	dependent GO term
signal transduction involved in mitotic G1 DNA damage checkpoint	8.48e-10	0	dependent GO term
DNA damage response, signal transduction by p53 class mediator resulting in cell cycle arrest	8.48e-10	0	dependent GO term
epidermal growth factor receptor signaling pathway	8.61e-10	0.555556	dependent GO term
signal transduction involved in DNA integrity checkpoint	9.01e-10	0	dependent GO term
signal transduction involved in DNA damage checkpoint	9.01e-10	0	dependent GO term
nuclear-transcribed mRNA catabolic process, exonucleolytic	9.07e-10	0	dependent GO term
ERBB signaling pathway	9.15e-10	0.555556	dependent GO term
signal transduction involved in cell cycle checkpoint	9.56e-10	0	dependent GO term
telomere maintenance via semi-conservative replication	1.1e-09	0.2	dependent GO term
positive regulation of ubiquitin-protein ligase activity involved in mitotic cell cycle	1.14e-09	0	dependent GO term
circadian rhythm	1.2e-09	0	dependent GO term
positive regulation of reproductive process	1.22e-09	0	dependent GO term
transcription elongation from RNA polymerase II promoter	1.27e-09	0	dependent GO term
negative regulation of ligase activity	1.34e-09	0	dependent GO term
negative regulation of ubiquitin-protein ligase activity	1.34e-09	0	dependent GO term
G1 DNA damage checkpoint	1.42e-09	0	dependent GO term
mitotic G1 DNA damage checkpoint	1.42e-09	0	dependent GO term
cell junction organization	1.43e-09	0	dependent GO term
regulation of cellular amine metabolic process	1.5e-09	0	dependent GO term
telomere maintenance via recombination	1.53e-09	0.2	dependent GO term
regulation of ubiquitin-protein ligase activity involved in mitotic cell cycle	1.58e-09	0	dependent GO term
morphogenesis of an epithelial bud	1.63e-09	0	dependent GO term
nuclear cell cycle DNA replication	1.78e-09	0.2	dependent GO term
positive regulation of cell cycle arrest	1.95e-09	0	dependent GO term
spliceosomal snRNP assembly	2e-09	0.125	dependent GO term
anaphase-promoting complex-dependent proteasomal ubiquitin-dependent protein catabolic process	2.05e-09	0	dependent GO term
mitotic DNA damage checkpoint	2.05e-09	0	dependent GO term
mitotic DNA integrity checkpoint	2.38e-09	0	dependent GO term
positive regulation of ubiquitin-protein ligase activity	2.38e-09	0	dependent GO term
protein deneddylation	2.62e-09	0.222222	dependent GO term
cullin deneddylation	2.62e-09	0.222222	dependent GO term
positive regulation of ligase activity	2.88e-09	0	dependent GO term
regulation of viral process	2.94e-09	0	dependent GO term
negative regulation of G1/S transition of mitotic cell cycle	3.47e-09	0	dependent GO term
regulation of cell cycle arrest	3.97e-09	0	dependent GO term
DNA unwinding involved in DNA replication	4.24e-09	0.181818	dependent GO term
DNA strand elongation involved in DNA replication	4.56e-09	0.2	dependent GO term
rRNA processing	4.93e-09	0	dependent GO term
cell cycle DNA replication	5.13e-09	0.2	dependent GO term
regulation of ubiquitin-protein ligase activity	5.14e-09	0	dependent GO term
ribonucleoprotein complex assembly	5.24e-09	0.125	dependent GO term
negative regulation of protein ubiquitination	5.36e-09	0	dependent GO term
mitotic recombination	5.75e-09	0.2	dependent GO term
regulation of ligase activity	6.07e-09	0	dependent GO term
rRNA metabolic process	6.32e-09	0	dependent GO term
DNA strand elongation	6.43e-09	0.2	dependent GO term
nuclear-transcribed mRNA poly(A) tail shortening	6.43e-09	0	dependent GO term
ribonucleoprotein complex subunit organization	6.85e-09	0.125	dependent GO term
peroxisome membrane biogenesis	7.19e-09	0	dependent GO term
DNA damage response, signal transduction by p53 class mediator	7.4e-09	0	dependent GO term
regulation of symbiosis, encompassing mutualism through parasitism	7.66e-09	0	dependent GO term
DNA-dependent DNA replication	8.9e-09	0.181818	dependent GO term
telomere maintenance via telomere lengthening	9.75e-09	0.2	dependent GO term
morphogenesis of an epithelial fold	1.09e-08	0	dependent GO term
regulation of G1/S transition of mitotic cell cycle	1.16e-08	0	dependent GO term
signal transduction in response to DNA damage	1.16e-08	0	dependent GO term
regulation of cellular amino acid metabolic process	1.2e-08	0	dependent GO term
behavioral response to nicotine	1.24e-08	0	dependent GO term
viral transcription	1.69e-08	0	dependent GO term
antigen processing and presentation of exogenous peptide antigen via MHC class I, TAP-dependent	1.75e-08	0	dependent GO term
antigen processing and presentation of exogenous peptide antigen via MHC class I	1.99e-08	0	dependent GO term
monoterpenoid metabolic process	1.99e-08	0.75	dependent GO term
negative regulation of ubiquitin-protein ligase activity involved in mitotic cell cycle	2.29e-08	0	dependent GO term
signal transduction involved in mitotic cell cycle checkpoint	2.29e-08	0	dependent GO term
signal transduction involved in mitotic G1 DNA damage checkpoint	2.29e-08	0	dependent GO term
DNA damage response, signal transduction by p53 class mediator resulting in cell cycle arrest	2.29e-08	0	dependent GO term
positive regulation of protein ubiquitination	2.33e-08	0	dependent GO term
signal transduction involved in DNA integrity checkpoint	2.43e-08	0	dependent GO term
signal transduction involved in DNA damage checkpoint	2.43e-08	0	dependent GO term
DNA damage checkpoint	2.48e-08	0	dependent GO term
signal transduction involved in cell cycle checkpoint	2.58e-08	0	dependent GO term
mitotic cell cycle checkpoint	2.64e-08	0	dependent GO term
omega-hydroxylase P450 pathway	2.99e-08	0.75	dependent GO term
positive regulation of ubiquitin-protein ligase activity involved in mitotic cell cycle	3.06e-08	0	dependent GO term
DNA integrity checkpoint	3.06e-08	0	dependent GO term
exonucleolytic nuclear-transcribed mRNA catabolic process involved in deadenylation-dependent decay	3.14e-08	0	dependent GO term
signal transduction by p53 class mediator	3.24e-08	0	dependent GO term
DNA repair	3.31e-08	0	dependent GO term
nuclear-transcribed mRNA catabolic process, deadenylation-dependent decay	3.34e-08	0	dependent GO term
transcription-coupled nucleotide-excision repair	3.44e-08	0.2	dependent GO term
nuclear-transcribed mRNA catabolic process, exonucleolytic	3.52e-08	0	dependent GO term
protein import into peroxisome membrane	3.59e-08	0	dependent GO term
negative regulation of ligase activity	3.62e-08	0	dependent GO term
negative regulation of ubiquitin-protein ligase activity	3.62e-08	0	dependent GO term
vesicle organization	3.66e-08	0.142857	dependent GO term
G1 DNA damage checkpoint	3.82e-08	0	dependent GO term
mitotic G1 DNA damage checkpoint	3.82e-08	0	dependent GO term
regulation of cellular amine metabolic process	4.04e-08	0	dependent GO term
regulation of cellular ketone metabolic process	4.07e-08	0	dependent GO term
regulation of ubiquitin-protein ligase activity involved in mitotic cell cycle	4.26e-08	0	dependent GO term
exogenous drug catabolic process	4.27e-08	0.75	dependent GO term
ribosome biogenesis	4.42e-08	0	dependent GO term
negative regulation of mitotic cell cycle phase transition	4.55e-08	0	dependent GO term
antigen processing and presentation of peptide antigen via MHC class I	4.67e-08	0	dependent GO term
establishment of vesicle localization	4.68e-08	0.142857	dependent GO term
transcription initiation from RNA polymerase II promoter	5.16e-08	0	dependent GO term
termination of RNA polymerase III transcription	5.21e-08	0	dependent GO term
transcription elongation from RNA polymerase III promoter	5.21e-08	0	dependent GO term
positive regulation of cell cycle arrest	5.24e-08	0	dependent GO term
mitotic DNA damage checkpoint	5.51e-08	0	dependent GO term
anaphase-promoting complex-dependent proteasomal ubiquitin-dependent protein catabolic process	5.51e-08	0	dependent GO term
epoxygenase P450 pathway	5.87e-08	0.75	dependent GO term
mitotic DNA integrity checkpoint	6.4e-08	0	dependent GO term
positive regulation of ubiquitin-protein ligase activity	6.4e-08	0	dependent GO term
protein polyubiquitination	6.73e-08	0	dependent GO term
positive regulation of ligase activity	7.76e-08	0	dependent GO term
positive regulation of cell cycle process	8.59e-08	0	dependent GO term
negative regulation of G1/S transition of mitotic cell cycle	9.33e-08	0	dependent GO term
RNA splicing, via transesterification reactions with bulged adenosine as nucleophile	9.73e-08	0	dependent GO term
mRNA splicing, via spliceosome	9.73e-08	0	dependent GO term
RNA splicing, via transesterification reactions with bulged adenosine as nucleophile	9.73e-08	0.125	dependent GO term
mRNA splicing, via spliceosome	9.73e-08	0.125	dependent GO term
positive regulation of fibrinolysis	9.96e-08	0.571429	dependent GO term
nuclear-transcribed mRNA catabolic process, deadenylation-dependent decay	1e-07	0	dependent GO term
peroxisomal membrane transport	1.01e-07	0	dependent GO term
regulation of cellular amino acid metabolic process	1.06e-07	0.25	dependent GO term
regulation of cell cycle arrest	1.07e-07	0	dependent GO term
RNA splicing, via transesterification reactions	1.1e-07	0	dependent GO term
RNA splicing, via transesterification reactions	1.1e-07	0.125	dependent GO term
intermediate filament bundle assembly	1.1e-07	0	dependent GO term
cell-cell adhesion	1.13e-07	0	dependent GO term
regulation of protein ubiquitination	1.14e-07	0	dependent GO term
cellular amine metabolic process	1.16e-07	0	dependent GO term
ribonucleoprotein complex assembly	1.28e-07	0	dependent GO term
drug catabolic process	1.29e-07	0.75	dependent GO term
vesicle localization	1.33e-07	0.142857	dependent GO term
inositol lipid-mediated signaling	1.36e-07	0.555556	dependent GO term
phosphatidylinositol-mediated signaling	1.36e-07	0.555556	dependent GO term
cellular ketone metabolic process	1.36e-07	0	dependent GO term
regulation of ubiquitin-protein ligase activity	1.38e-07	0	dependent GO term
amine metabolic process	1.39e-07	0	dependent GO term
regulation of mitotic cell cycle phase transition	1.42e-07	0	dependent GO term
negative regulation of protein ubiquitination	1.44e-07	0	dependent GO term
ribonucleoprotein complex subunit organization	1.61e-07	0	dependent GO term
lateral mesoderm development	1.62e-07	0	dependent GO term
microtubule nucleation	1.62e-07	0	dependent GO term
regulation of ligase activity	1.63e-07	0	dependent GO term
telomere maintenance	1.68e-07	0.2	dependent GO term
telomere organization	1.76e-07	0.2	dependent GO term
negative regulation of ubiquitin-protein ligase activity involved in mitotic cell cycle	1.76e-07	0.25	dependent GO term
signal transduction involved in mitotic cell cycle checkpoint	1.76e-07	0.25	dependent GO term
signal transduction involved in mitotic G1 DNA damage checkpoint	1.76e-07	0.25	dependent GO term
DNA damage response, signal transduction by p53 class mediator resulting in cell cycle arrest	1.76e-07	0.25	dependent GO term
cell cycle arrest	1.79e-07	0	dependent GO term
ncRNA processing	1.79e-07	0	dependent GO term
signal transduction involved in DNA integrity checkpoint	1.85e-07	0.25	dependent GO term
signal transduction involved in DNA damage checkpoint	1.85e-07	0.25	dependent GO term
signal transduction involved in cell cycle checkpoint	1.94e-07	0.25	dependent GO term
DNA damage response, signal transduction by p53 class mediator	1.99e-07	0	dependent GO term
anterograde synaptic vesicle transport	1.99e-07	0	dependent GO term
G1/S transition of mitotic cell cycle	2.06e-07	0	dependent GO term
phagosome maturation	2.1e-07	0	dependent GO term
positive regulation of ubiquitin-protein ligase activity involved in mitotic cell cycle	2.23e-07	0.25	dependent GO term
cellular response to growth factor stimulus	2.39e-07	0.333333	dependent GO term
formation of translation preinitiation complex	2.42e-07	0	dependent GO term
nucleotide-excision repair	2.43e-07	0.2	dependent GO term
negative regulation of ligase activity	2.54e-07	0.25	dependent GO term
negative regulation of ubiquitin-protein ligase activity	2.54e-07	0.25	dependent GO term
G1 DNA damage checkpoint	2.66e-07	0.25	dependent GO term
mitotic G1 DNA damage checkpoint	2.66e-07	0.25	dependent GO term
cell cycle checkpoint	2.71e-07	0	dependent GO term
regulation of cellular amine metabolic process	2.77e-07	0.25	dependent GO term
cellular response to glucagon stimulus	2.83e-07	0	dependent GO term
regulation of ubiquitin-protein ligase activity involved in mitotic cell cycle	2.89e-07	0.25	dependent GO term
notochord development	2.9e-07	0	dependent GO term
melanosome organization	2.9e-07	0	dependent GO term
signal transduction in response to DNA damage	3.11e-07	0	dependent GO term
regulation of G1/S transition of mitotic cell cycle	3.11e-07	0	dependent GO term
transforming growth factor beta receptor signaling pathway	3.14e-07	0.166667	dependent GO term
enzyme linked receptor protein signaling pathway	3.4e-07	0.555556	dependent GO term
positive regulation of cell cycle arrest	3.41e-07	0.25	dependent GO term
paraxial mesoderm development	3.45e-07	0	dependent GO term
pigment granule organization	3.45e-07	0	dependent GO term
C21-steroid hormone biosynthetic process	3.45e-07	0	dependent GO term
ribonucleoprotein complex biogenesis	3.54e-07	0.125	dependent GO term
mitotic DNA damage checkpoint	3.56e-07	0.25	dependent GO term
anaphase-promoting complex-dependent proteasomal ubiquitin-dependent protein catabolic process	3.56e-07	0.25	dependent GO term
establishment of organelle localization	3.59e-07	0.142857	dependent GO term
mRNA 3'-end processing	3.85e-07	0	dependent GO term
negative regulation of cell cycle phase transition	3.91e-07	0	dependent GO term
DNA-dependent DNA replication	4e-07	0.2	dependent GO term
mitotic DNA integrity checkpoint	4e-07	0.25	dependent GO term
positive regulation of ubiquitin-protein ligase activity	4e-07	0.25	dependent GO term
spliceosomal complex assembly	4.03e-07	0	dependent GO term
proteasomal protein catabolic process	4.05e-07	0	dependent GO term
neurofilament cytoskeleton organization	4.62e-07	0	dependent GO term
interphase	4.65e-07	0	dependent GO term
positive regulation of ligase activity	4.67e-07	0.25	dependent GO term
antigen processing and presentation of exogenous peptide antigen via MHC class I, TAP-dependent	4.69e-07	0	dependent GO term
antigen processing and presentation of exogenous peptide antigen via MHC class I	5.33e-07	0	dependent GO term
negative regulation of G1/S transition of mitotic cell cycle	5.41e-07	0.25	dependent GO term
Golgi vesicle transport	5.54e-07	0.142857	dependent GO term
toll-like receptor 4 signaling pathway	5.81e-07	0.2	dependent GO term
regulation of cell cycle arrest	6.02e-07	0.25	dependent GO term
ribonucleoprotein complex biogenesis	6.07e-07	0	dependent GO term
nuclear-transcribed mRNA catabolic process, deadenylation-dependent decay	6.12e-07	0	dependent GO term
positive regulation of protein ubiquitination	6.24e-07	0	dependent GO term
prostatic bud formation	6.6e-07	0	dependent GO term
DNA damage checkpoint	6.64e-07	0	dependent GO term
RNA 3'-end processing	6.68e-07	0	dependent GO term
mitotic cell cycle checkpoint	7.06e-07	0	dependent GO term
negative regulation of cell cycle process	7.12e-07	0	dependent GO term
anterograde axon cargo transport	7.2e-07	0	dependent GO term
cellular response to transforming growth factor beta stimulus	7.35e-07	0.166667	dependent GO term
regulation of ubiquitin-protein ligase activity	7.4e-07	0.25	dependent GO term
negative regulation of protein ubiquitination	7.65e-07	0.25	dependent GO term
regulation of cell cycle phase transition	7.82e-07	0	dependent GO term
DNA integrity checkpoint	8.19e-07	0	dependent GO term
antigen processing and presentation of exogenous peptide antigen	8.44e-07	0	dependent GO term
regulation of ligase activity	8.44e-07	0.25	dependent GO term
signal transduction by p53 class mediator	8.68e-07	0	dependent GO term
antigen processing and presentation of exogenous antigen	8.69e-07	0	dependent GO term
cell cycle phase	8.96e-07	0	dependent GO term
regulation of glomerulus development	9.08e-07	0	dependent GO term
DNA damage response, signal transduction by p53 class mediator	9.89e-07	0.25	dependent GO term
membrane biogenesis	1.01e-06	0	dependent GO term
telomere maintenance	1.03e-06	0.6	dependent GO term
telomere organization	1.08e-06	0.6	dependent GO term
regulation of cellular ketone metabolic process	1.09e-06	0	dependent GO term
ncRNA metabolic process	1.12e-06	0	dependent GO term
negative regulation of cell cycle	1.15e-06	0	dependent GO term
regulation of mitotic cell cycle	1.16e-06	0	dependent GO term
negative regulation of mitotic cell cycle phase transition	1.22e-06	0	dependent GO term
antigen processing and presentation of peptide antigen via MHC class I	1.25e-06	0	dependent GO term
antigen processing and presentation of peptide antigen	1.25e-06	0	dependent GO term
protein transport	1.3e-06	0	dependent GO term
intracellular transport	1.32e-06	0	dependent GO term
platelet degranulation	1.36e-06	0.6	dependent GO term
RNA splicing	1.38e-06	0	dependent GO term
RNA splicing	1.38e-06	0.125	dependent GO term
regulation of G1/S transition of mitotic cell cycle	1.41e-06	0.25	dependent GO term
signal transduction in response to DNA damage	1.41e-06	0.25	dependent GO term
RNA splicing, via transesterification reactions with bulged adenosine as nucleophile	1.46e-06	0	dependent GO term
mRNA splicing, via spliceosome	1.46e-06	0	dependent GO term
positive regulation of peptidyl-tyrosine phosphorylation	1.47e-06	0.555556	dependent GO term
negative regulation of fibrinolysis	1.57e-06	0.166667	dependent GO term
lateral sprouting from an epithelium	1.57e-06	0	dependent GO term
embryonic skeletal joint morphogenesis	1.57e-06	0	dependent GO term
peptide cross-linking	1.6e-06	0	dependent GO term
sarcomere organization	1.6e-06	0	dependent GO term
RNA splicing, via transesterification reactions	1.61e-06	0	dependent GO term
protein localization to peroxisome	1.74e-06	0	dependent GO term
establishment of protein localization to peroxisome	1.74e-06	0	dependent GO term
protein targeting to peroxisome	1.74e-06	0	dependent GO term
ketone biosynthetic process	1.76e-06	0	dependent GO term
C21-steroid hormone metabolic process	1.76e-06	0	dependent GO term
organelle localization	1.78e-06	0.142857	dependent GO term
protein polyubiquitination	1.8e-06	0	dependent GO term
DNA duplex unwinding	1.89e-06	0.181818	dependent GO term
negative regulation of protein modification process	1.92e-06	0	dependent GO term
establishment of protein localization	1.93e-06	0	dependent GO term
antigen processing and presentation of exogenous peptide antigen via MHC class I, TAP-dependent	1.96e-06	0.25	dependent GO term
antigen processing and presentation	2.15e-06	0	dependent GO term
transmembrane receptor protein tyrosine kinase signaling pathway	2.17e-06	0.555556	dependent GO term
antigen processing and presentation of exogenous peptide antigen via MHC class I	2.18e-06	0.25	dependent GO term
positive regulation of cell cycle process	2.29e-06	0	dependent GO term
toll-like receptor signaling pathway	2.35e-06	0.2	dependent GO term
peroxisomal transport	2.39e-06	0	dependent GO term
DNA-dependent DNA replication	2.44e-06	0.6	dependent GO term
DNA geometric change	2.46e-06	0.181818	dependent GO term
positive regulation of protein ubiquitination	2.47e-06	0.25	dependent GO term
DNA damage checkpoint	2.59e-06	0	dependent GO term
DNA damage checkpoint	2.59e-06	0.25	dependent GO term
mitotic cell cycle checkpoint	2.72e-06	0.25	dependent GO term
mitotic spindle assembly checkpoint	2.76e-06	0.333333	dependent GO term
negative regulation of metaphase/anaphase transition of cell cycle	3e-06	0.333333	dependent GO term
spindle assembly checkpoint	3e-06	0.333333	dependent GO term
negative regulation of mitotic metaphase/anaphase transition	3e-06	0.333333	dependent GO term
response to nicotine	3e-06	0	dependent GO term
regulation of protein ubiquitination	3.03e-06	0	dependent GO term
DNA integrity checkpoint	3.07e-06	0	dependent GO term
DNA integrity checkpoint	3.07e-06	0.25	dependent GO term
embryonic skeletal joint development	3.08e-06	0	dependent GO term
SCF-dependent proteasomal ubiquitin-dependent protein catabolic process	3.08e-06	0	dependent GO term
cellular amine metabolic process	3.1e-06	0	dependent GO term
signal transduction by p53 class mediator	3.21e-06	0.25	dependent GO term
cellular pigmentation	3.25e-06	0	dependent GO term
leukocyte degranulation	3.37e-06	0	dependent GO term
mitotic spindle checkpoint	3.51e-06	0.333333	dependent GO term
cellular ketone metabolic process	3.61e-06	0	dependent GO term
amine metabolic process	3.69e-06	0	dependent GO term
regulation of mitotic cell cycle phase transition	3.77e-06	0	dependent GO term
axon cargo transport	3.79e-06	0	dependent GO term
pattern recognition receptor signaling pathway	3.85e-06	0.2	dependent GO term
regulation of cellular ketone metabolic process	3.85e-06	0.25	dependent GO term
transcription from RNA polymerase III promoter	3.93e-06	0	dependent GO term
mitotic cell cycle phase transition	4.02e-06	0	dependent GO term
cellular protein localization	4.15e-06	0	dependent GO term
negative regulation of mitotic cell cycle phase transition	4.2e-06	0.25	dependent GO term
ribonucleoprotein complex biogenesis	4.29e-06	0	dependent GO term
innate immune response-activating signal transduction	4.3e-06	0.2	dependent GO term
antigen processing and presentation of peptide antigen via MHC class I	4.3e-06	0.25	dependent GO term
cellular macromolecule localization	4.31e-06	0	dependent GO term
transmembrane receptor protein serine/threonine kinase signaling pathway	4.43e-06	0.166667	dependent GO term
positive regulation of transmembrane receptor protein serine/threonine kinase signaling pathway	4.63e-06	0.166667	dependent GO term
JAK-STAT cascade involved in growth hormone signaling pathway	4.67e-06	0.75	dependent GO term
cell cycle arrest	4.76e-06	0	dependent GO term
cell junction assembly	4.78e-06	0	dependent GO term
cell-cell junction organization	4.88e-06	0	dependent GO term
ubiquitin-dependent protein catabolic process	4.94e-06	0	dependent GO term
activation of innate immune response	4.98e-06	0.2	dependent GO term
myofibril assembly	5.05e-06	0	dependent GO term
negative regulation of nuclear division	5.05e-06	0.333333	dependent GO term
negative regulation of mitosis	5.05e-06	0.333333	dependent GO term
mRNA processing	5.18e-06	0	dependent GO term
mRNA processing	5.18e-06	0.125	dependent GO term
modification-dependent protein catabolic process	5.27e-06	0	dependent GO term
regulation of metaphase/anaphase transition of cell cycle	5.4e-06	0.333333	dependent GO term
regulation of mitotic metaphase/anaphase transition	5.4e-06	0.333333	dependent GO term
G1/S transition of mitotic cell cycle	5.49e-06	0	dependent GO term
modification-dependent macromolecule catabolic process	5.49e-06	0	dependent GO term
cellular localization	5.7e-06	0	dependent GO term
protein polyubiquitination	5.75e-06	0.25	dependent GO term
metaphase/anaphase transition of cell cycle	5.77e-06	0.333333	dependent GO term
spindle checkpoint	5.77e-06	0.333333	dependent GO term
metaphase/anaphase transition of mitotic cell cycle	5.77e-06	0.333333	dependent GO term
BMP signaling pathway	5.85e-06	0	dependent GO term
regulation of peptidyl-tyrosine phosphorylation	5.99e-06	0.555556	dependent GO term
regulated secretory pathway	6.05e-06	0	dependent GO term
intermediate filament organization	6.27e-06	0	dependent GO term
gland morphogenesis	6.62e-06	0	dependent GO term
proteolysis involved in cellular protein catabolic process	6.67e-06	0	dependent GO term
regulation of cell cycle process	6.74e-06	0	dependent GO term
double-strand break repair	6.82e-06	0.6	dependent GO term
regulation of transforming growth factor beta receptor signaling pathway	6.85e-06	0.166667	dependent GO term
synaptic transmission, glutamatergic	6.97e-06	0	dependent GO term
positive regulation of cell cycle process	6.99e-06	0.25	dependent GO term
cell cycle checkpoint	7.2e-06	0	dependent GO term
negative regulation of cellular protein metabolic process	7.29e-06	0	dependent GO term
follicular dendritic cell activation	7.34e-06	0.25	dependent GO term
follicular dendritic cell differentiation	7.34e-06	0.25	dependent GO term
peptidyl-tyrosine sulfation	7.34e-06	0	dependent GO term
interleukin-8-mediated signaling pathway	7.34e-06	0	dependent GO term
cholecystokinin signaling pathway	7.34e-06	0	dependent GO term
histone H3 acetylation	7.86e-06	0	dependent GO term
ncRNA metabolic process	7.87e-06	0	dependent GO term
cellular macromolecule biosynthetic process	7.89e-06	0.05	dependent GO term
cellular protein catabolic process	8.04e-06	0	dependent GO term
intracellular protein transmembrane import	8.07e-06	0	dependent GO term
cellular amino acid metabolic process	8.2e-06	0	dependent GO term
regulation of protein ubiquitination	8.73e-06	0.25	dependent GO term
cell junction organization	8.73e-06	0	dependent GO term
autophagy	8.87e-06	0	dependent GO term
cellular amine metabolic process	8.89e-06	0.25	dependent GO term
nuclear-transcribed mRNA catabolic process	8.89e-06	0	dependent GO term
DNA metabolic process	8.9e-06	0	dependent GO term
growth hormone receptor signaling pathway	8.9e-06	0.75	dependent GO term
positive regulation of signal transduction by p53 class mediator	9.05e-06	0	dependent GO term
positive regulation of DNA damage response, signal transduction by p53 class mediator	9.05e-06	0	dependent GO term
plasminogen activation	9.05e-06	0.571429	dependent GO term
fibroblast growth factor receptor signaling pathway	9.1e-06	0.555556	dependent GO term
nuclear-transcribed mRNA catabolic process	9.14e-06	0	dependent GO term
cell cycle phase transition	9.36e-06	0	dependent GO term
cellular response to growth hormone stimulus	9.79e-06	0.75	dependent GO term
vesicle-mediated transport	9.8e-06	0	dependent GO term
positive regulation of innate immune response	9.89e-06	0.2	dependent GO term
Fc-epsilon receptor signaling pathway	1.01e-05	0.555556	dependent GO term
cellular ketone metabolic process	1.01e-05	0.25	dependent GO term
amine metabolic process	1.02e-05	0.25	dependent GO term
phagocytosis	1.04e-05	0	dependent GO term
toll-like receptor 10 signaling pathway	1.04e-05	0.333333	dependent GO term
negative regulation of cell cycle phase transition	1.04e-05	0	dependent GO term
G-protein coupled receptor signaling pathway	1.04e-05	0	dependent GO term
regulation of mitotic cell cycle phase transition	1.04e-05	0.25	dependent GO term
protein folding	1.04e-05	0	dependent GO term
proteasomal protein catabolic process	1.07e-05	0	dependent GO term
positive regulation of hemostasis	1.07e-05	0.166667	dependent GO term
positive regulation of blood coagulation	1.07e-05	0.166667	dependent GO term
toll-like receptor 5 signaling pathway	1.1e-05	0.333333	dependent GO term
arachidonic acid metabolic process	1.1e-05	0.75	dependent GO term
actomyosin structure organization	1.1e-05	0	dependent GO term
intracellular protein transport	1.13e-05	0	dependent GO term
macromolecule biosynthetic process	1.16e-05	0.05	dependent GO term
in utero embryonic development	1.17e-05	0.166667	dependent GO term
protein transmembrane transport	1.17e-05	0	dependent GO term
intracellular protein transmembrane transport	1.17e-05	0	dependent GO term
blood coagulation	1.19e-05	0.6	dependent GO term
protein targeting to mitochondrion	1.22e-05	0	dependent GO term
embryonic heart tube morphogenesis	1.22e-05	0	dependent GO term
interphase	1.23e-05	0	dependent GO term
hemostasis	1.25e-05	0.6	dependent GO term
cell cycle arrest	1.25e-05	0.25	dependent GO term
amyloid precursor protein metabolic process	1.26e-05	0.2	dependent GO term
ER to Golgi vesicle-mediated transport	1.28e-05	0	dependent GO term
peroxisome organization	1.28e-05	0	dependent GO term
mRNA catabolic process	1.28e-05	0	dependent GO term
exonucleolytic nuclear-transcribed mRNA catabolic process involved in deadenylation-dependent decay	1.28e-05	0	dependent GO term
ER to Golgi vesicle-mediated transport	1.28e-05	0	dependent GO term
RNA splicing	1.33e-05	0	dependent GO term
nuclear-transcribed mRNA catabolic process, exonucleolytic	1.39e-05	0	dependent GO term
G1/S transition of mitotic cell cycle	1.41e-05	0.25	dependent GO term
mRNA catabolic process	1.43e-05	0	dependent GO term
negative regulation of protein metabolic process	1.45e-05	0	dependent GO term
positive regulation of coagulation	1.49e-05	0.166667	dependent GO term
protein localization	1.5e-05	0	dependent GO term
endocytosis	1.5e-05	0	dependent GO term
trivalent inorganic cation transport	1.51e-05	0.25	dependent GO term
ferric iron transport	1.51e-05	0.25	dependent GO term
transferrin transport	1.51e-05	0.25	dependent GO term
toll-like receptor TLR1:TLR2 signaling pathway	1.52e-05	0.333333	dependent GO term
toll-like receptor TLR6:TLR2 signaling pathway	1.52e-05	0.333333	dependent GO term
cellular response to fibroblast growth factor stimulus	1.59e-05	0.555556	dependent GO term
DNA recombination	1.62e-05	0.2	dependent GO term
gene silencing by miRNA	1.64e-05	0	dependent GO term
toll-like receptor 9 signaling pathway	1.68e-05	0.333333	dependent GO term
positive regulation of type I interferon production	1.68e-05	0	dependent GO term
immune response-regulating cell surface receptor signaling pathway involved in phagocytosis	1.72e-05	0	dependent GO term
Fc-gamma receptor signaling pathway	1.72e-05	0	dependent GO term
Fc-gamma receptor signaling pathway involved in phagocytosis	1.72e-05	0	dependent GO term
cell adhesion	1.73e-05	0	dependent GO term
cell cycle checkpoint	1.75e-05	0	dependent GO term
cell cycle checkpoint	1.75e-05	0.25	dependent GO term
TRIF-dependent toll-like receptor signaling pathway	1.77e-05	0.333333	dependent GO term
negative regulation of catalytic activity	1.84e-05	0	dependent GO term
negative regulation of cell cycle process	1.88e-05	0	dependent GO term
binding of sperm to zona pellucida	1.91e-05	0.2	dependent GO term
RNA catabolic process	2e-05	0	dependent GO term
positive regulation of intrinsic apoptotic signaling pathway	2.01e-05	0.166667	dependent GO term
Fc receptor mediated stimulatory signaling pathway	2.03e-05	0	dependent GO term
toll-like receptor 2 signaling pathway	2.05e-05	0.333333	dependent GO term
tight junction assembly	2.06e-05	0	dependent GO term
regulation of cell cycle phase transition	2.07e-05	0	dependent GO term
MyD88-independent toll-like receptor signaling pathway	2.15e-05	0.333333	dependent GO term
peptidyl-tyrosine phosphorylation	2.19e-05	0.555556	dependent GO term
protein import into peroxisome matrix, docking	2.2e-05	0	dependent GO term
meiotic chromosome condensation	2.2e-05	0.333333	dependent GO term
RNA (guanine-N7)-methylation	2.2e-05	0	dependent GO term
synaptic transmission involved in micturition	2.2e-05	0	dependent GO term
apoptotic process involved in luteolysis	2.2e-05	0	dependent GO term
complement activation, classical pathway	2.21e-05	0.5	dependent GO term
complement activation, classical pathway	2.21e-05	0	dependent GO term
antigen processing and presentation of exogenous peptide antigen	2.23e-05	0	dependent GO term
regulation of translation	2.28e-05	0	dependent GO term
peptidyl-tyrosine modification	2.29e-05	0.555556	dependent GO term
antigen processing and presentation of exogenous antigen	2.3e-05	0	dependent GO term
embryonic heart tube development	2.31e-05	0	dependent GO term
establishment of synaptic vesicle localization	2.31e-05	0	dependent GO term
synaptic vesicle transport	2.31e-05	0	dependent GO term
hormone biosynthetic process	2.31e-05	0	dependent GO term
negative regulation of cell cycle phase transition	2.34e-05	0	dependent GO term
negative regulation of cell cycle phase transition	2.34e-05	0.25	dependent GO term
protein catabolic process	2.35e-05	0	dependent GO term
cell cycle phase	2.37e-05	0	dependent GO term
posttranscriptional gene silencing	2.38e-05	0	dependent GO term
posttranscriptional gene silencing by RNA	2.38e-05	0	dependent GO term
regulation of cellular amino acid metabolic process	2.4e-05	0	dependent GO term
regulation of cellular amino acid metabolic process	2.4e-05	0	dependent GO term
zymogen activation	2.41e-05	0.571429	dependent GO term
proteasomal protein catabolic process	2.41e-05	0.25	dependent GO term
nuclear membrane organization	2.42e-05	0	dependent GO term
protein ubiquitination	2.44e-05	0	dependent GO term
RNA catabolic process	2.51e-05	0	dependent GO term
transcription from RNA polymerase II promoter	2.55e-05	0.05	dependent GO term
toll-like receptor 3 signaling pathway	2.6e-05	0.333333	dependent GO term
synaptic vesicle localization	2.6e-05	0	dependent GO term
fibrinolysis	2.65e-05	0.166667	dependent GO term
cartilage development	2.67e-05	0	dependent GO term
interphase	2.69e-05	0.25	dependent GO term
regulation of toll-like receptor signaling pathway	2.72e-05	0.2	dependent GO term
prostate gland epithelium morphogenesis	2.73e-05	0	dependent GO term
positive regulation of cytokine production	2.8e-05	0.2	dependent GO term
regulation of translational initiation	2.81e-05	0	dependent GO term
blood coagulation, intrinsic pathway	2.83e-05	0.571429	dependent GO term
DNA replication	2.88e-05	0.2	dependent GO term
microtubule-based transport	2.92e-05	0	dependent GO term
intracellular signal transduction	3e-05	0	dependent GO term
regulation of innate immune response	3e-05	0.2	dependent GO term
negative regulation of cell cycle	3.03e-05	0	dependent GO term
regulation of body fluid levels	3.04e-05	0.6	dependent GO term
nucleic acid metabolic process	3.07e-05	0.05	dependent GO term
regulation of mitotic cell cycle	3.07e-05	0	dependent GO term
positive regulation of defense response	3.12e-05	0.2	dependent GO term
collagen catabolic process	3.27e-05	0.333333	dependent GO term
antigen processing and presentation of peptide antigen	3.29e-05	0	dependent GO term
regulation of release of cytochrome c from mitochondria	3.29e-05	0.166667	dependent GO term
apical junction assembly	3.3e-05	0	dependent GO term
protein modification by small protein conjugation	3.37e-05	0	dependent GO term
establishment of protein localization to mitochondrion	3.39e-05	0	dependent GO term
telomere maintenance	3.39e-05	0.333333	dependent GO term
histone mRNA metabolic process	3.41e-05	0	dependent GO term
transmembrane receptor protein serine/threonine kinase signaling pathway	3.42e-05	0	dependent GO term
wound healing	3.47e-05	0.6	dependent GO term
protein localization to mitochondrion	3.51e-05	0	dependent GO term
telomere organization	3.51e-05	0.333333	dependent GO term
signal transduction involved in mitotic cell cycle checkpoint	3.51e-05	0	dependent GO term
signal transduction involved in mitotic G1 DNA damage checkpoint	3.51e-05	0	dependent GO term
DNA damage response, signal transduction by p53 class mediator resulting in cell cycle arrest	3.51e-05	0	dependent GO term
negative regulation of ubiquitin-protein ligase activity involved in mitotic cell cycle	3.51e-05	0	dependent GO term
negative regulation of ubiquitin-protein ligase activity involved in mitotic cell cycle	3.51e-05	0.333333	dependent GO term
cellular response to metal ion	3.51e-05	0	dependent GO term
vascular endothelial growth factor receptor signaling pathway	3.52e-05	0	dependent GO term
transmembrane receptor protein tyrosine kinase signaling pathway	3.62e-05	0.166667	dependent GO term
neurotrophin TRK receptor signaling pathway	3.63e-05	0.333333	dependent GO term
signal transduction involved in DNA integrity checkpoint	3.64e-05	0	dependent GO term
signal transduction involved in DNA damage checkpoint	3.64e-05	0	dependent GO term
neurotrophin signaling pathway	3.69e-05	0.333333	dependent GO term
negative regulation of apoptotic process	3.73e-05	0	dependent GO term
sperm-egg recognition	3.74e-05	0.2	dependent GO term
signal transduction involved in cell cycle checkpoint	3.77e-05	0	dependent GO term
negative regulation of cell cycle process	3.78e-05	0	dependent GO term
negative regulation of cell cycle process	3.78e-05	0.25	dependent GO term
negative regulation of mitotic recombination	3.79e-05	0.6	dependent GO term
long-chain fatty acid metabolic process	3.9e-05	0.75	dependent GO term
retinoid metabolic process	3.9e-05	0.666667	dependent GO term
negative regulation of programmed cell death	3.92e-05	0	dependent GO term
MyD88-dependent toll-like receptor signaling pathway	4e-05	0.333333	dependent GO term
protein export from nucleus	4.01e-05	0	dependent GO term
mRNA processing	4.02e-05	0	dependent GO term
cellular response to inorganic substance	4.04e-05	0	dependent GO term
regulation of cell cycle phase transition	4.07e-05	0	dependent GO term
regulation of cell cycle phase transition	4.07e-05	0.25	dependent GO term
complement activation	4.18e-05	0.5	dependent GO term
positive regulation of ubiquitin-protein ligase activity involved in mitotic cell cycle	4.18e-05	0	dependent GO term
RNA export from nucleus	4.18e-05	0	dependent GO term
complement activation	4.18e-05	0	dependent GO term
mitotic recombination	4.27e-05	0.6	dependent GO term
prostate gland morphogenesis	4.27e-05	0	dependent GO term
intermediate filament cytoskeleton organization	4.27e-05	0	dependent GO term
multicellular organismal catabolic process	4.32e-05	0.333333	dependent GO term
neuron-neuron synaptic transmission	4.32e-05	0	dependent GO term
feeding behavior	4.32e-05	0	dependent GO term
antigen processing and presentation of exogenous peptide antigen	4.33e-05	0.25	dependent GO term
protein modification by small protein removal	4.36e-05	0.222222	dependent GO term
blood coagulation, fibrin clot formation	4.4e-05	0.571429	dependent GO term
vesicle fusion with Golgi apparatus	4.4e-05	0	dependent GO term
regulation of dermatome development	4.4e-05	0	dependent GO term
multivesicular body sorting pathway	4.4e-05	0	dependent GO term
response to muscle stretch	4.4e-05	0	dependent GO term
cargo loading into vesicle	4.4e-05	0	dependent GO term
response to potassium ion	4.4e-05	0	dependent GO term
cellular response to potassium ion	4.4e-05	0	dependent GO term
5-phosphoribose 1-diphosphate metabolic process	4.4e-05	0.333333	dependent GO term
5-phosphoribose 1-diphosphate biosynthetic process	4.4e-05	0.333333	dependent GO term
antigen processing and presentation of exogenous antigen	4.43e-05	0.25	dependent GO term
diterpenoid metabolic process	4.47e-05	0.666667	dependent GO term
Fc receptor signaling pathway	4.53e-05	0.555556	dependent GO term
cell cycle phase	4.54e-05	0.25	dependent GO term
negative regulation of ligase activity	4.61e-05	0	dependent GO term
negative regulation of ubiquitin-protein ligase activity	4.61e-05	0	dependent GO term
negative regulation of ligase activity	4.61e-05	0.333333	dependent GO term
negative regulation of ubiquitin-protein ligase activity	4.61e-05	0.333333	dependent GO term
protein phosphorylation	4.65e-05	0.166667	dependent GO term
icosanoid metabolic process	4.77e-05	0.75	dependent GO term
G1 DNA damage checkpoint	4.77e-05	0	dependent GO term
mitotic G1 DNA damage checkpoint	4.77e-05	0	dependent GO term
negative regulation of cell death	4.82e-05	0	dependent GO term
chromatin disassembly	4.86e-05	0	dependent GO term
protein-DNA complex disassembly	4.86e-05	0	dependent GO term
nucleosome disassembly	4.86e-05	0	dependent GO term
cytoskeleton-dependent intracellular transport	4.92e-05	0	dependent GO term
regulation of cellular amine metabolic process	4.92e-05	0	dependent GO term
regulation of cellular amine metabolic process	4.92e-05	0	dependent GO term
fibrinolysis	5.02e-05	0.571429	dependent GO term
negative regulation of protein modification process	5.05e-05	0	dependent GO term
regulation of ubiquitin-protein ligase activity involved in mitotic cell cycle	5.08e-05	0	dependent GO term
regulation of ubiquitin-protein ligase activity involved in mitotic cell cycle	5.08e-05	0.333333	dependent GO term
neuromuscular process	5.08e-05	0	dependent GO term
establishment of localization in cell	5.17e-05	0	dependent GO term
mRNA metabolic process	5.18e-05	0	dependent GO term
mRNA metabolic process	5.18e-05	0	dependent GO term
phagosome maturation	5.25e-05	0.25	dependent GO term
nuclear-transcribed mRNA catabolic process	5.4e-05	0	dependent GO term
fatty acid metabolic process	5.48e-05	0.25	dependent GO term
negative regulation of cell cycle	5.54e-05	0.25	dependent GO term
transcription initiation from RNA polymerase II promoter	5.6e-05	0	dependent GO term
regulation of mitotic cell cycle	5.6e-05	0.25	dependent GO term
protein modification by small protein conjugation or removal	5.61e-05	0	dependent GO term
antigen processing and presentation	5.65e-05	0	dependent GO term
RNA processing	5.65e-05	0	dependent GO term
connective tissue development	5.7e-05	0	dependent GO term
positive regulation of cell cycle arrest	5.75e-05	0	dependent GO term
tRNA processing	5.75e-05	0	dependent GO term
fatty acid beta-oxidation	5.83e-05	0.25	dependent GO term
antigen processing and presentation of peptide antigen	5.93e-05	0.25	dependent GO term
anaphase-promoting complex-dependent proteasomal ubiquitin-dependent protein catabolic process	5.93e-05	0	dependent GO term
mitotic DNA damage checkpoint	5.93e-05	0	dependent GO term
anaphase-promoting complex-dependent proteasomal ubiquitin-dependent protein catabolic process	5.93e-05	0.333333	dependent GO term
anatomical structure homeostasis	6.06e-05	0.2	dependent GO term
phototransduction, visible light	6.11e-05	0.666667	dependent GO term
cellular macromolecular complex assembly	6.13e-05	0.125	dependent GO term
regulation of chemokine production	6.14e-05	0.2	dependent GO term
cell-cell recognition	6.14e-05	0.2	dependent GO term
macromolecule localization	6.22e-05	0	dependent GO term
response to alkaloid	6.29e-05	0	dependent GO term
negative regulation of molecular function	6.43e-05	0	dependent GO term
iron ion transport	6.45e-05	0.25	dependent GO term
extracellular matrix disassembly	6.48e-05	0.333333	dependent GO term
mitotic DNA integrity checkpoint	6.48e-05	0	dependent GO term
positive regulation of ubiquitin-protein ligase activity	6.48e-05	0	dependent GO term
positive regulation of interleukin-1 beta production	6.49e-05	0.333333	dependent GO term
modulation by virus of host morphology or physiology	6.63e-05	0	dependent GO term
terpenoid metabolic process	6.67e-05	0.75	dependent GO term
terpenoid metabolic process	6.67e-05	0.666667	dependent GO term
macromolecular complex assembly	6.76e-05	0	dependent GO term
regulation of pathway-restricted SMAD protein phosphorylation	6.78e-05	0	dependent GO term
positive regulation of transcription from RNA polymerase II promoter	6.85e-05	0	dependent GO term
unsaturated fatty acid metabolic process	7.06e-05	0.75	dependent GO term
toll-like receptor 4 signaling pathway	7.07e-05	0.333333	dependent GO term
mRNA metabolic process	7.13e-05	0	dependent GO term
mRNA metabolic process	7.13e-05	0.125	dependent GO term
regulation of DNA damage response, signal transduction by p53 class mediator	7.26e-05	0	dependent GO term
positive regulation of ligase activity	7.26e-05	0	dependent GO term
cellular hormone metabolic process	7.26e-05	0	dependent GO term
modification by symbiont of host morphology or physiology	7.3e-05	0	dependent GO term
meiotic cytokinesis	7.34e-05	0	dependent GO term
double-strand break repair via synthesis-dependent strand annealing	7.34e-05	0.333333	dependent GO term
DNA recombinase assembly	7.34e-05	0.333333	dependent GO term
keratinocyte development	7.34e-05	0	dependent GO term
luteolysis	7.34e-05	0	dependent GO term
viral process	7.38e-05	0	dependent GO term
viral process	7.38e-05	0	dependent GO term
platelet activation	7.62e-05	0.6	dependent GO term
mRNA catabolic process	7.74e-05	0	dependent GO term
positive regulation of protein phosphorylation	7.75e-05	0.555556	dependent GO term
organic substance transport	7.79e-05	0	dependent GO term
regulation of type I interferon production	7.85e-05	0	dependent GO term
protein activation cascade	7.89e-05	0.5	dependent GO term
protein activation cascade	7.89e-05	0	dependent GO term
RNA processing	7.9e-05	0	dependent GO term
RNA processing	7.9e-05	0.125	dependent GO term
negative regulation of G1/S transition of mitotic cell cycle	8.11e-05	0	dependent GO term
detection of visible light	8.11e-05	0.666667	dependent GO term
chemokine production	8.2e-05	0.2	dependent GO term
regulation of nuclear division	8.33e-05	0.333333	dependent GO term
regulation of mitosis	8.33e-05	0.333333	dependent GO term
negative regulation of protein modification process	8.35e-05	0.25	dependent GO term
double-strand break repair via homologous recombination	8.59e-05	0	dependent GO term
ncRNA metabolic process	8.64e-05	0.125	dependent GO term
neurotrophin TRK receptor signaling pathway	8.67e-05	0.555556	dependent GO term
Fc receptor mediated stimulatory signaling pathway	8.69e-05	0	dependent GO term
type I interferon production	8.69e-05	0	dependent GO term
complement activation, lectin pathway	8.71e-05	0.666667	dependent GO term
positive regulation of phosphorylation	8.75e-05	0.555556	dependent GO term
regulation of cell cycle arrest	8.78e-05	0	dependent GO term
positive regulation of protein modification process	8.8e-05	0	dependent GO term
neurotrophin signaling pathway	8.82e-05	0.555556	dependent GO term
pathway-restricted SMAD protein phosphorylation	8.9e-05	0	dependent GO term
recombinational repair	8.98e-05	0	dependent GO term
antigen processing and presentation	9.15e-05	0.25	dependent GO term
immune response-activating cell surface receptor signaling pathway	9.27e-05	0	dependent GO term
positive regulation of interleukin-1 production	9.34e-05	0.333333	dependent GO term
positive regulation of pathway-restricted SMAD protein phosphorylation	9.34e-05	0.166667	dependent GO term
RNA biosynthetic process	9.41e-05	0.05	dependent GO term
leukocyte migration	9.59e-05	0	dependent GO term
modification of morphology or physiology of other organism involved in symbiotic interaction	9.73e-05	0	dependent GO term
phototransduction	9.74e-05	0.666667	dependent GO term
DNA recombination	9.83e-05	0.6	dependent GO term
humoral immune response mediated by circulating immunoglobulin	9.99e-05	0.5	dependent GO term
keratinocyte differentiation	9.99e-05	0	dependent GO term
humoral immune response mediated by circulating immunoglobulin	9.99e-05	0	dependent GO term
intra-Golgi vesicle-mediated transport	0.000102	0.142857	dependent GO term
vesicle organization	0.000102	0	dependent GO term
regulation of ubiquitin-protein ligase activity	0.000102	0	dependent GO term
regulation of ubiquitin-protein ligase activity	0.000102	0.333333	dependent GO term
kinin cascade	0.000103	0.571429	dependent GO term
plasma kallikrein-kinin cascade	0.000103	0.571429	dependent GO term
Factor XII activation	0.000103	0.571429	dependent GO term
phosphorylation	0.000104	0.166667	dependent GO term
mitotic cell cycle phase transition	0.000105	0	dependent GO term
cellular macromolecule catabolic process	0.000105	0	dependent GO term
negative regulation of protein ubiquitination	0.000105	0	dependent GO term
negative regulation of protein ubiquitination	0.000105	0.333333	dependent GO term
exocytosis	0.000108	0	dependent GO term
viral process	0.000108	0	dependent GO term
regulation of mitochondrial membrane permeability	0.000108	0.166667	dependent GO term
histone acetylation	0.000108	0	dependent GO term
establishment of vesicle localization	0.000109	0	dependent GO term
membrane organization	0.00011	0.142857	dependent GO term
isoprenoid metabolic process	0.00011	0.75	dependent GO term
forebrain anterior/posterior pattern specification	0.00011	0	dependent GO term
peptidyl-proline hydroxylation to 4-hydroxy-L-proline	0.00011	0	dependent GO term
collagen metabolic process	0.00011	0.333333	dependent GO term
cellular response to type I interferon	0.00011	0	dependent GO term
isoprenoid metabolic process	0.00011	0.666667	dependent GO term
chromosome organization	0.000111	0.6	dependent GO term
response to molecule of fungal origin	0.000111	0.2	dependent GO term
response to type I interferon	0.000113	0	dependent GO term
regulation of ligase activity	0.000113	0	dependent GO term
regulation of ligase activity	0.000113	0.333333	dependent GO term
striated muscle contraction	0.000113	0	dependent GO term
adult behavior	0.000113	0	dependent GO term
modification by virus of host cell cycle regulation	0.000114	0.166667	dependent GO term
cellular process regulating host cell cycle in response to virus	0.000114	0.166667	dependent GO term
negative regulation of glomerular mesangial cell proliferation	0.000114	0	dependent GO term
neuronal signal transduction	0.000114	0	dependent GO term
interspecies interaction between organisms	0.000116	0	dependent GO term
symbiosis, encompassing mutualism through parasitism	0.000116	0	dependent GO term
interspecies interaction between organisms	0.000116	0	dependent GO term
symbiosis, encompassing mutualism through parasitism	0.000116	0	dependent GO term
modification of morphology or physiology of other organism	0.000117	0	dependent GO term
establishment of vesicle localization	0.000119	0	dependent GO term
release of cytochrome c from mitochondria	0.000121	0.166667	dependent GO term
RNA catabolic process	0.000121	0	dependent GO term
prostate gland development	0.000121	0	dependent GO term
detection of light stimulus	0.000121	0.666667	dependent GO term
cellular macromolecule biosynthetic process	0.000124	0.181818	dependent GO term
mesoderm development	0.000124	0	dependent GO term
chordate embryonic development	0.000125	0.166667	dependent GO term
fatty acid catabolic process	0.000126	0.25	dependent GO term
DNA damage response, signal transduction by p53 class mediator	0.000127	0	dependent GO term
ubiquitin-dependent protein catabolic process	0.000129	0	dependent GO term
negative regulation of hemostasis	0.000129	0.166667	dependent GO term
negative regulation of blood coagulation	0.000129	0.166667	dependent GO term
mRNA transport	0.00013	0	dependent GO term
gene silencing by RNA	0.000131	0	dependent GO term
cell-cell junction assembly	0.000131	0	dependent GO term
embryo development ending in birth or egg hatching	0.000132	0.166667	dependent GO term
mitotic cell cycle	0.000133	0	dependent GO term
multicellular organismal macromolecule metabolic process	0.000133	0.333333	dependent GO term
modification-dependent protein catabolic process	0.000137	0	dependent GO term
regulation of translation	0.000138	0	dependent GO term
wound healing	0.000139	0.555556	dependent GO term
endocytosis	0.000139	0	dependent GO term
double-strand break repair	0.000139	0.333333	dependent GO term
protein targeting to ER	0.000139	0	dependent GO term
proton transport	0.000142	0.25	dependent GO term
modification-dependent macromolecule catabolic process	0.000143	0	dependent GO term
DNA repair	0.000143	0	dependent GO term
establishment of protein localization to endoplasmic reticulum	0.000143	0	dependent GO term
interaction with host	0.000145	0	dependent GO term
RNA splicing	0.000146	0	dependent GO term
immune response-activating signal transduction	0.000146	0.2	dependent GO term
positive regulation of type I interferon production	0.000147	0.2	dependent GO term
fatty acid oxidation	0.000147	0.25	dependent GO term
regulation of epithelial to mesenchymal transition	0.00015	0.166667	dependent GO term
mitotic cell cycle phase transition	0.000151	0.25	dependent GO term
antigen processing and presentation, exogenous lipid antigen via MHC class Ib	0.000153	0	dependent GO term
cellular iron ion homeostasis	0.000153	0.25	dependent GO term
hydrogen transport	0.000153	0.25	dependent GO term
protein sulfation	0.000154	0	dependent GO term
G-protein coupled glutamate receptor signaling pathway	0.000154	0	dependent GO term
disruption by host of symbiont cells	0.000154	0	dependent GO term
killing by host of symbiont cells	0.000154	0	dependent GO term
transmembrane receptor protein tyrosine phosphatase signaling pathway	0.000154	0	dependent GO term
positive regulation of cholesterol esterification	0.000154	0.333333	dependent GO term
cellular response to purine-containing compound	0.000154	0	dependent GO term
cellular response to caffeine	0.000154	0	dependent GO term
micturition	0.000154	0	dependent GO term
glutamate catabolic process	0.000154	0	dependent GO term
cellular biosynthetic process	0.000156	0.05	dependent GO term
internal peptidyl-lysine acetylation	0.000156	0	dependent GO term
cellular response to growth factor stimulus	0.000158	0.166667	dependent GO term
homophilic cell adhesion	0.000159	0	dependent GO term
regulation of kidney development	0.00016	0	dependent GO term
positive regulation of cellular protein metabolic process	0.000161	0	dependent GO term
regulation of pathway-restricted SMAD protein phosphorylation	0.000161	0.166667	dependent GO term
macromolecule biosynthetic process	0.000163	0.181818	dependent GO term
collagen catabolic process	0.000165	0.5	dependent GO term
lipid oxidation	0.000165	0.25	dependent GO term
regulation of G1/S transition of mitotic cell cycle	0.000166	0	dependent GO term
signal transduction in response to DNA damage	0.000166	0	dependent GO term
peptidyl-lysine acetylation	0.000166	0	dependent GO term
autophagy	0.00017	0	dependent GO term
leukocyte chemotaxis	0.00017	0	dependent GO term
sterol metabolic process	0.00017	0	dependent GO term
peptidyl-serine phosphorylation	0.000171	0.333333	dependent GO term
negative regulation of coagulation	0.000173	0.166667	dependent GO term
proteolysis involved in cellular protein catabolic process	0.000174	0	dependent GO term
regulation of cell cycle process	0.000175	0	dependent GO term
DNA replication	0.000175	0.6	dependent GO term
ubiquitin-dependent protein catabolic process	0.000178	0.25	dependent GO term
cellular response to peptide	0.000179	0.166667	dependent GO term
cellular response to peptide hormone stimulus	0.000179	0.166667	dependent GO term
posttranscriptional regulation of gene expression	0.000179	0	dependent GO term
positive regulation of phosphorus metabolic process	0.000183	0.555556	dependent GO term
positive regulation of phosphate metabolic process	0.000183	0.555556	dependent GO term
nuclear export	0.000184	0	dependent GO term
internal protein amino acid acetylation	0.000184	0	dependent GO term
positive regulation of protein tyrosine kinase activity	0.000185	0.555556	dependent GO term
regulation of interleukin-1 beta production	0.000185	0.333333	dependent GO term
membrane tubulation	0.000185	0	dependent GO term
retrograde protein transport, ER to cytosol	0.000185	0	dependent GO term
membrane to membrane docking	0.000185	0.25	dependent GO term
interspecies interaction between organisms	0.000186	0	dependent GO term
symbiosis, encompassing mutualism through parasitism	0.000186	0	dependent GO term
modification-dependent protein catabolic process	0.000187	0.25	dependent GO term
transcription from RNA polymerase II promoter	0.000189	0	dependent GO term
endocytosis	0.000189	0	dependent GO term
acetyl-CoA biosynthetic process from pyruvate	0.000189	0	dependent GO term
regulation of acetyl-CoA biosynthetic process from pyruvate	0.000189	0	dependent GO term
negative regulation of cellular protein metabolic process	0.00019	0	dependent GO term
protein localization to endoplasmic reticulum	0.000192	0	dependent GO term
DNA repair	0.000193	0	dependent GO term
DNA repair	0.000193	0.2	dependent GO term
DNA repair	0.000193	0	dependent GO term
modification-dependent macromolecule catabolic process	0.000193	0.25	dependent GO term
exocytosis	0.000194	0.6	dependent GO term
gland development	0.000194	0	dependent GO term
G-protein coupled receptor signaling pathway, coupled to cyclic nucleotide second messenger	0.000196	0	dependent GO term
regulation of morphogenesis of a branching structure	0.000197	0	dependent GO term
actin cytoskeleton organization	0.0002	0	dependent GO term
mRNA processing	0.0002	0	dependent GO term
actin polymerization or depolymerization	0.0002	0	dependent GO term
nucleic acid transport	0.0002	0	dependent GO term
establishment of RNA localization	0.0002	0	dependent GO term
RNA transport	0.0002	0	dependent GO term
nucleic acid transport	0.0002	0	dependent GO term
establishment of RNA localization	0.0002	0	dependent GO term
RNA transport	0.0002	0	dependent GO term
organic substance biosynthetic process	0.000205	0.05	dependent GO term
peptidyl-proline hydroxylation	0.000205	0	dependent GO term
platelet dense granule organization	0.000205	0	dependent GO term
cellular response to interferon-alpha	0.000205	0	dependent GO term
cortisol metabolic process	0.000205	0	dependent GO term
cortisol biosynthetic process	0.000205	0	dependent GO term
transmembrane receptor protein serine/threonine kinase signaling pathway	0.000207	0	dependent GO term
cellular protein catabolic process	0.000209	0	dependent GO term
carboxylic acid metabolic process	0.000209	0	dependent GO term
antigen processing and presentation of exogenous peptide antigen via MHC class I, TAP-dependent	0.000212	0	dependent GO term
cellular amino acid metabolic process	0.000213	0	dependent GO term
G2/M transition of mitotic cell cycle	0.000216	0	dependent GO term
ribonucleoprotein complex assembly	0.000216	0	dependent GO term
multicellular organismal catabolic process	0.000218	0.5	dependent GO term
regulation of acyl-CoA biosynthetic process	0.00022	0	dependent GO term
vesicle localization	0.000221	0	dependent GO term
cellular lipid catabolic process	0.000221	0	dependent GO term
enzyme linked receptor protein signaling pathway	0.000222	0.166667	dependent GO term
monocarboxylic acid metabolic process	0.000224	0.25	dependent GO term
activation of cysteine-type endopeptidase activity involved in apoptotic process	0.000225	0.25	dependent GO term
activation of cysteine-type endopeptidase activity involved in apoptotic process	0.000225	0.25	dependent GO term
alcohol biosynthetic process	0.000225	0	dependent GO term
cellular response to ionizing radiation	0.000226	0	dependent GO term
proteolysis involved in cellular protein catabolic process	0.000226	0.25	dependent GO term
regulation of mitotic recombination	0.000227	0.6	dependent GO term
negative regulation of prostatic bud formation	0.000227	0	dependent GO term
steroid hormone mediated signaling pathway	0.000227	0	dependent GO term
receptor localization to synapse	0.000227	0	dependent GO term
synaptic vesicle clustering	0.000227	0	dependent GO term
N-methyl-D-aspartate receptor clustering	0.000227	0	dependent GO term
energy reserve metabolic process	0.000228	0	dependent GO term
positive regulation of apoptotic signaling pathway	0.000228	0.166667	dependent GO term
regulation of cell cycle process	0.000228	0	dependent GO term
regulation of cell cycle process	0.000228	0.25	dependent GO term
antigen processing and presentation of exogenous peptide antigen via MHC class I	0.000229	0	dependent GO term
monocarboxylic acid catabolic process	0.000232	0.25	dependent GO term
RNA localization	0.000234	0	dependent GO term
RNA localization	0.000234	0	dependent GO term
termination of RNA polymerase II transcription	0.000241	0	dependent GO term
positive regulation of catalytic activity	0.000242	0	dependent GO term
cell cycle phase transition	0.000243	0	dependent GO term
negative regulation of cellular protein metabolic process	0.000243	0.25	dependent GO term
negative regulation of hemostasis	0.000245	0.571429	dependent GO term
negative regulation of blood coagulation	0.000245	0.571429	dependent GO term
tRNA metabolic process	0.000247	0	dependent GO term
ribonucleoprotein complex subunit organization	0.000247	0	dependent GO term
peptidyl-serine modification	0.00025	0.333333	dependent GO term
extracellular matrix organization	0.00025	0.333333	dependent GO term
vesicle localization	0.00025	0	dependent GO term
cell-type specific apoptotic process	0.00025	0	dependent GO term
positive regulation of protein ubiquitination	0.000252	0	dependent GO term
protein acetylation	0.000252	0	dependent GO term
extracellular structure organization	0.000254	0.333333	dependent GO term
regulation of cofactor metabolic process	0.000254	0	dependent GO term
regulation of coenzyme metabolic process	0.000254	0	dependent GO term
regulation of interleukin-1 production	0.000256	0.333333	dependent GO term
positive regulation of protein metabolic process	0.000258	0	dependent GO term
mast cell degranulation	0.00026	0	dependent GO term
DNA damage checkpoint	0.000261	0	dependent GO term
cellular protein catabolic process	0.000262	0.25	dependent GO term
positive regulation of viral transcription	0.000263	0	dependent GO term
phagocytosis	0.000264	0	dependent GO term
activation of cysteine-type endopeptidase activity	0.000264	0.25	dependent GO term
complement activation, lectin pathway	0.000264	0.5	dependent GO term
activation of cysteine-type endopeptidase activity	0.000264	0.25	dependent GO term
regulation of cholesterol esterification	0.000264	0.333333	dependent GO term
negative regulation of synaptic transmission, glutamatergic	0.000264	0	dependent GO term
opioid receptor signaling pathway	0.000264	0	dependent GO term
aldosterone biosynthetic process	0.000264	0	dependent GO term
cellular amino acid metabolic process	0.000266	0.25	dependent GO term
striated muscle cell development	0.000266	0	dependent GO term
nucleobase-containing compound biosynthetic process	0.000268	0.05	dependent GO term
mitochondrial transport	0.000271	0	dependent GO term
mitotic cell cycle checkpoint	0.000271	0	dependent GO term
mitotic cell cycle checkpoint	0.000271	0	dependent GO term
mitotic cell cycle checkpoint	0.000271	0.333333	dependent GO term
interleukin-1 beta production	0.000272	0.333333	dependent GO term
activation of immune response	0.000272	0.2	dependent GO term
macromolecular complex subunit organization	0.000274	0	dependent GO term
organ formation	0.000275	0	dependent GO term
regulation of bile acid biosynthetic process	0.000278	0.25	dependent GO term
regionalization	0.000281	0	dependent GO term
MyD88-dependent toll-like receptor signaling pathway	0.000281	0.2	dependent GO term
epidermal cell differentiation	0.000281	0	dependent GO term
toll-like receptor signaling pathway	0.000283	0.333333	dependent GO term
steroid biosynthetic process	0.000286	0	dependent GO term
cellular response to organic substance	0.000288	0.333333	dependent GO term
mast cell mediated immunity	0.000289	0	dependent GO term
mast cell activation involved in immune response	0.000289	0	dependent GO term
acetyl-CoA biosynthetic process	0.00029	0	dependent GO term
cellular response to xenobiotic stimulus	0.000291	0.75	dependent GO term
cell chemotaxis	0.000291	0	dependent GO term
cellular response to xenobiotic stimulus	0.000291	0	dependent GO term
phosphorylation	0.000295	0.555556	dependent GO term
epithelial tube morphogenesis	0.000295	0	dependent GO term
cell cycle phase transition	0.000296	0	dependent GO term
cell cycle phase transition	0.000296	0.25	dependent GO term
DNA integrity checkpoint	0.000296	0	dependent GO term
DNA metabolic process	0.000302	0.6	dependent GO term
signal transduction by p53 class mediator	0.000307	0	dependent GO term
cellular component assembly involved in morphogenesis	0.000307	0	dependent GO term
blood coagulation	0.000308	0.571429	dependent GO term
activation of plasma proteins involved in acute inflammatory response	0.000308	0.571429	dependent GO term
cellular macromolecular complex assembly	0.000317	0	dependent GO term
nucleobase-containing compound transport	0.000318	0	dependent GO term
muscle cell development	0.000318	0	dependent GO term
nucleobase-containing compound transport	0.000318	0	dependent GO term
secretion by cell	0.000324	0	dependent GO term
macromolecule catabolic process	0.000324	0	dependent GO term
hemostasis	0.000324	0.571429	dependent GO term
nucleobase-containing compound metabolic process	0.000326	0.05	dependent GO term
nucleic acid metabolic process	0.000326	0.181818	dependent GO term
regulation of actin filament polymerization	0.000326	0	dependent GO term
iron ion homeostasis	0.000326	0.25	dependent GO term
extracellular matrix disassembly	0.000326	0.5	dependent GO term
mitochondrial membrane organization	0.000327	0.166667	dependent GO term
negative regulation of coagulation	0.000328	0.571429	dependent GO term
4-hydroxyproline metabolic process	0.00033	0	dependent GO term
disruption of cells of other organism involved in symbiotic interaction	0.00033	0	dependent GO term
killing of cells in other organism involved in symbiotic interaction	0.00033	0	dependent GO term
cellular response to interleukin-15	0.00033	0	dependent GO term
bundle of His cell to Purkinje myocyte communication	0.00033	0	dependent GO term
aldosterone metabolic process	0.00033	0	dependent GO term
aromatic compound biosynthetic process	0.000335	0.05	dependent GO term
heterocycle biosynthetic process	0.000337	0.05	dependent GO term
immunoglobulin mediated immune response	0.00034	0.5	dependent GO term
microtubule-based movement	0.00034	0	dependent GO term
immunoglobulin mediated immune response	0.00034	0	dependent GO term
mesoderm formation	0.000341	0	dependent GO term
detection of abiotic stimulus	0.000346	0.666667	dependent GO term
regulation of cellular ketone metabolic process	0.000351	0	dependent GO term
regulation of cellular ketone metabolic process	0.000351	0	dependent GO term
regulation of intrinsic apoptotic signaling pathway	0.000355	0.166667	dependent GO term
regulation of BMP signaling pathway	0.000355	0	dependent GO term
mRNA metabolic process	0.00036	0	dependent GO term
tube morphogenesis	0.000362	0	dependent GO term
B cell mediated immunity	0.000363	0.5	dependent GO term
B cell mediated immunity	0.000363	0	dependent GO term
anatomical structure homeostasis	0.000366	0.6	dependent GO term
oxoacid metabolic process	0.000367	0	dependent GO term
protein targeting to membrane	0.000369	0	dependent GO term
proteolysis	0.00037	0	dependent GO term
negative regulation of DNA metabolic process	0.00037	0.6	dependent GO term
chaperone mediated protein folding requiring cofactor	0.00037	0	dependent GO term
regulation of dendritic spine morphogenesis	0.00037	0.333333	dependent GO term
transmembrane receptor protein tyrosine kinase signaling pathway	0.000373	0.1	dependent GO term
negative regulation of mitotic cell cycle phase transition	0.000375	0	dependent GO term
negative regulation of mitotic cell cycle phase transition	0.000375	0	dependent GO term
negative regulation of mitotic cell cycle phase transition	0.000375	0.333333	dependent GO term
protein acylation	0.000375	0	dependent GO term
negative regulation of protein metabolic process	0.000376	0	dependent GO term
single fertilization	0.000376	0.2	dependent GO term
transition metal ion transport	0.000376	0.25	dependent GO term
regulation of glomerular mesangial cell proliferation	0.000379	0	dependent GO term
postsynaptic membrane assembly	0.000379	0	dependent GO term
neurotransmitter-gated ion channel clustering	0.000379	0	dependent GO term
postsynaptic density protein 95 clustering	0.000379	0	dependent GO term
antigen processing and presentation of peptide antigen via MHC class I	0.000381	0	dependent GO term
interleukin-1 production	0.000382	0.333333	dependent GO term
extracellular matrix organization	0.000383	0.2	dependent GO term
mesoderm morphogenesis	0.000385	0	dependent GO term
extracellular structure organization	0.000387	0.2	dependent GO term
RNA processing	0.000392	0	dependent GO term
organic acid metabolic process	0.000394	0	dependent GO term
humoral immune response	0.000394	0.5	dependent GO term
peptidyl-lysine modification	0.000394	0	dependent GO term
humoral immune response	0.000394	0	dependent GO term
immune response-regulating signaling pathway	0.000398	0.2	dependent GO term
mammary gland development	0.0004	0.555556	dependent GO term
establishment of organelle localization	0.0004	0	dependent GO term
odontogenesis of dentin-containing tooth	0.000401	0	dependent GO term
activation of JAK2 kinase activity	0.000403	0	dependent GO term
phospholipid efflux	0.000403	0.333333	dependent GO term
polyamine biosynthetic process	0.000403	0	dependent GO term
cellular transition metal ion homeostasis	0.000408	0.25	dependent GO term
negative regulation of transcription from RNA polymerase II promoter	0.000409	0.25	dependent GO term
cellular response to endogenous stimulus	0.000413	0.555556	dependent GO term
Fc-epsilon receptor signaling pathway	0.000413	0	dependent GO term
positive regulation of protein modification process	0.000416	0.555556	dependent GO term
organic hydroxy compound biosynthetic process	0.000419	0	dependent GO term
negative regulation of protein metabolic process	0.000421	0.25	dependent GO term
translation	0.000421	0	dependent GO term
hormone metabolic process	0.000426	0	dependent GO term
cellular nitrogen compound biosynthetic process	0.000428	0.05	dependent GO term
adenylate cyclase-modulating G-protein coupled receptor signaling pathway	0.00043	0.25	dependent GO term
JAK-STAT cascade	0.00043	0.75	dependent GO term
adenylate cyclase-modulating G-protein coupled receptor signaling pathway	0.00043	0.25	dependent GO term
nuclear division	0.000431	0	dependent GO term
mitosis	0.000431	0	dependent GO term
mRNA processing	0.000436	0	dependent GO term
cytoplasmic transport	0.000445	0	dependent GO term
ATP catabolic process	0.00045	0.6	dependent GO term
positive regulation of type I interferon production	0.00045	0	dependent GO term
intracellular steroid hormone receptor signaling pathway	0.000454	0	dependent GO term
regulation of cellular protein metabolic process	0.000455	0.555556	dependent GO term
regulation of defense response	0.000456	0.2	dependent GO term
antigen processing and presentation of lipid antigen via MHC class Ib	0.000459	0	dependent GO term
regulation of sodium ion transmembrane transporter activity	0.00046	0	dependent GO term
negative regulation of organelle organization	0.00046	0.333333	dependent GO term
pattern recognition receptor signaling pathway	0.000463	0.333333	dependent GO term
regulation of type I interferon production	0.000465	0.2	dependent GO term
regulation of viral transcription	0.000467	0	dependent GO term
regulation of mitochondrion organization	0.000467	0.166667	dependent GO term
lamellipodium assembly	0.000471	0	dependent GO term
negative regulation of catalytic activity	0.000474	0	dependent GO term
protein polyubiquitination	0.000474	0	dependent GO term
negative regulation of sterol transport	0.000484	0.333333	dependent GO term
negative regulation of cholesterol transport	0.000484	0.333333	dependent GO term
steroid esterification	0.000484	0.333333	dependent GO term
sterol esterification	0.000484	0.333333	dependent GO term
cholesterol esterification	0.000484	0.333333	dependent GO term
negative regulation of lipase activity	0.000484	0.333333	dependent GO term
dicarboxylic acid biosynthetic process	0.000484	0	dependent GO term
positive regulation of response to DNA damage stimulus	0.000485	0	dependent GO term
regulation of actin polymerization or depolymerization	0.00049	0	dependent GO term
regulation of protein modification process	0.000495	0	dependent GO term
positive regulation of RNA metabolic process	0.000502	0	dependent GO term
type I interferon production	0.000502	0.2	dependent GO term
regulation of actin filament length	0.000502	0	dependent GO term
JNK cascade	0.000503	0	dependent GO term
response to peptide	0.000504	0.166667	dependent GO term
negative regulation of catalytic activity	0.000507	0.25	dependent GO term
organic cyclic compound biosynthetic process	0.00051	0.05	dependent GO term
innate immune response-activating signal transduction	0.000517	0.333333	dependent GO term
Golgi vesicle transport	0.000518	0	dependent GO term
Golgi vesicle transport	0.000518	0	dependent GO term
heart morphogenesis	0.000526	0	dependent GO term
actin filament polymerization	0.000528	0	dependent GO term
negative regulation of angiogenesis	0.000543	0.166667	dependent GO term
regulation of blood coagulation	0.000543	0.166667	dependent GO term
positive regulation of cell cycle process	0.000549	0	dependent GO term
positive regulation of gene expression	0.00055	0	dependent GO term
establishment of organelle localization	0.000551	0	dependent GO term
collagen metabolic process	0.000555	0.5	dependent GO term
positive regulation of release of cytochrome c from mitochondria	0.000559	0.333333	dependent GO term
positive regulation of viral process	0.00056	0	dependent GO term
regulation of bile acid biosynthetic process	0.000568	0	dependent GO term
amyloid precursor protein biosynthetic process	0.000568	0.2	dependent GO term
regulation of amyloid precursor protein biosynthetic process	0.000568	0.2	dependent GO term
glomerular mesangial cell proliferation	0.000568	0	dependent GO term
negative regulation of cell proliferation involved in kidney development	0.000568	0	dependent GO term
regulation of protein polymerization	0.000568	0	dependent GO term
positive regulation of cysteine-type endopeptidase activity involved in apoptotic process	0.000568	0.25	dependent GO term
positive regulation of cysteine-type endopeptidase activity involved in apoptotic process	0.000568	0.25	dependent GO term
oxidative demethylation	0.000572	0.75	dependent GO term
hematopoietic stem cell proliferation	0.000572	0	dependent GO term
Arp2/3 complex-mediated actin nucleation	0.000572	0	dependent GO term
regulation of exit from mitosis	0.000572	0	dependent GO term
activation of Janus kinase activity	0.000572	0	dependent GO term
kinetochore organization	0.000572	0.333333	dependent GO term
mitotic chromosome condensation	0.000572	0.333333	dependent GO term
response to interleukin-15	0.000572	0	dependent GO term
endocytic recycling	0.000572	0.333333	dependent GO term
negative chemotaxis	0.000572	0	dependent GO term
cytokine biosynthetic process	0.000582	0.2	dependent GO term
organelle fission	0.000586	0	dependent GO term
activation of innate immune response	0.000598	0.333333	dependent GO term
embryonic skeletal system morphogenesis	0.000601	0	dependent GO term
protein catabolic process	0.000605	0	dependent GO term
cellular response to endogenous stimulus	0.000605	0.166667	dependent GO term
intracellular protein transport	0.000608	0.142857	dependent GO term
positive regulation of molecular function	0.000609	0	dependent GO term
protein catabolic process	0.000618	0.25	dependent GO term
detection of external stimulus	0.000623	0.666667	dependent GO term
cellular response to lipopolysaccharide	0.000625	0.2	dependent GO term
cytokine metabolic process	0.000625	0.2	dependent GO term
gene silencing	0.000625	0	dependent GO term
cellular response to organonitrogen compound	0.000628	0.166667	dependent GO term
modulation by virus of host morphology or physiology	0.000628	0.166667	dependent GO term
protein ubiquitination	0.000629	0	dependent GO term
regulation of transmission of nerve impulse	0.000631	0	dependent GO term
immune response-regulating cell surface receptor signaling pathway	0.000632	0	dependent GO term
immune response-regulating cell surface receptor signaling pathway	0.000632	0.555556	dependent GO term
protein ubiquitination	0.000638	0.25	dependent GO term
protein ubiquitination	0.000638	0.25	dependent GO term
negative regulation of cellular metabolic process	0.000648	0.222222	dependent GO term
regulation of protein ubiquitination	0.000648	0	dependent GO term
regulation of protein ubiquitination	0.000648	0.333333	dependent GO term
cellular amine metabolic process	0.000657	0	dependent GO term
cellular amine metabolic process	0.000657	0	dependent GO term
positive regulation of multi-organism process	0.000665	0	dependent GO term
regulation of nuclear-transcribed mRNA catabolic process, deadenylation-dependent decay	0.000667	0	dependent GO term
regulation of nuclear-transcribed mRNA poly(A) tail shortening	0.000667	0	dependent GO term
protein import into peroxisome matrix	0.000667	0	dependent GO term
hemidesmosome assembly	0.000667	0	dependent GO term
retinal metabolic process	0.000667	0.666667	dependent GO term
protein import into peroxisome matrix	0.000667	0	dependent GO term
Golgi transport vesicle coating	0.000667	0	dependent GO term
COPI-coated vesicle budding	0.000667	0	dependent GO term
COPI coating of Golgi vesicle	0.000667	0	dependent GO term
cell communication by electrical coupling involved in cardiac conduction	0.000667	0	dependent GO term
dendritic spine morphogenesis	0.000668	0.333333	dependent GO term
positive regulation of cysteine-type endopeptidase activity	0.00067	0.25	dependent GO term
positive regulation of cysteine-type endopeptidase activity	0.00067	0.25	dependent GO term
multicellular organismal macromolecule metabolic process	0.00067	0.5	dependent GO term
positive regulation of multicellular organismal process	0.000674	0.2	dependent GO term
transcription initiation from RNA polymerase II promoter	0.000675	0	dependent GO term
transcription initiation from RNA polymerase II promoter	0.000675	0	dependent GO term
lipid transport	0.000675	0.333333	dependent GO term
regulation of macromolecule metabolic process	0.000676	0	dependent GO term
cellular response to hormone stimulus	0.000678	0.166667	dependent GO term
modification by symbiont of host morphology or physiology	0.000678	0.166667	dependent GO term
regulation of protein phosphorylation	0.000682	0.555556	dependent GO term
negative regulation of transforming growth factor beta receptor signaling pathway	0.000683	0.166667	dependent GO term
immune response-activating signal transduction	0.000699	0	dependent GO term
cellular response to molecule of bacterial origin	0.000701	0.2	dependent GO term
double-strand break repair	0.000701	0	dependent GO term
regulation of endocytosis	0.000701	0	dependent GO term
negative regulation of macromolecule metabolic process	0.000706	0.222222	dependent GO term
defense response to virus	0.000712	0	dependent GO term
cellular ketone metabolic process	0.000721	0	dependent GO term
skeletal muscle tissue development	0.000721	0	dependent GO term
cellular ketone metabolic process	0.000721	0	dependent GO term
cellular ketone metabolic process	0.000721	0	dependent GO term
secretion	0.000723	0	dependent GO term
amine metabolic process	0.000731	0	dependent GO term
amine metabolic process	0.000731	0	dependent GO term
regulation of mitotic cell cycle phase transition	0.00074	0	dependent GO term
regulation of mitotic cell cycle phase transition	0.00074	0	dependent GO term
regulation of mitotic cell cycle phase transition	0.00074	0.333333	dependent GO term
positive regulation of endopeptidase activity	0.00075	0.25	dependent GO term
positive regulation of endopeptidase activity	0.00075	0.25	dependent GO term
protein homooligomerization	0.00075	0	dependent GO term
response to calcium ion	0.000757	0.6	dependent GO term
mast cell activation	0.000758	0	dependent GO term
cellular component assembly	0.000761	0	dependent GO term
cellular component assembly	0.000761	0	dependent GO term
regulation of RNA biosynthetic process	0.000765	0	dependent GO term
regulation of neurological system process	0.000769	0	dependent GO term
germinal center formation	0.00077	0.25	dependent GO term
activation of MAPKKK activity	0.00077	0.5	dependent GO term
regulation of establishment of planar polarity involved in neural tube closure	0.00077	0	dependent GO term
planar cell polarity pathway involved in neural tube closure	0.00077	0	dependent GO term
vesicle targeting, rough ER to cis-Golgi	0.00077	0	dependent GO term
Golgi vesicle budding	0.00077	0	dependent GO term
COPII vesicle coating	0.00077	0	dependent GO term
amyloid precursor protein catabolic process	0.00077	0	dependent GO term
vesicle targeting, rough ER to cis-Golgi	0.00077	0	dependent GO term
COPII vesicle coating	0.00077	0	dependent GO term
vesicle targeting, rough ER to cis-Golgi	0.00077	0	dependent GO term
COPII vesicle coating	0.00077	0	dependent GO term
response to caffeine	0.00077	0	dependent GO term
dicarboxylic acid catabolic process	0.00077	0	dependent GO term
regulation of body fluid levels	0.000781	0.571429	dependent GO term
transition metal ion homeostasis	0.000783	0.25	dependent GO term
dendritic spine organization	0.000787	0.333333	dependent GO term
skeletal muscle organ development	0.000789	0	dependent GO term
response to metal ion	0.000789	0	dependent GO term
lens induction in camera-type eye	0.000795	0	dependent GO term
iris morphogenesis	0.000795	0	dependent GO term
regulation of prostatic bud formation	0.000795	0	dependent GO term
positive regulation of mRNA splicing, via spliceosome	0.000795	0	dependent GO term
regulation of anatomical structure morphogenesis	0.000797	0	dependent GO term
apoptotic mitochondrial changes	0.000806	0.166667	dependent GO term
positive regulation of immune response	0.00082	0.2	dependent GO term
protein modification by small protein conjugation	0.000825	0.25	dependent GO term
protein modification by small protein conjugation	0.000825	0.25	dependent GO term
cellular response to nitrogen compound	0.000831	0.166667	dependent GO term
negative regulation of axon extension involved in axon guidance	0.000834	0	dependent GO term
positive regulation of peptidase activity	0.000835	0.25	dependent GO term
positive regulation of peptidase activity	0.000835	0.25	dependent GO term
positive regulation of cellular protein metabolic process	0.000846	0.555556	dependent GO term
morphogenesis of an epithelium	0.000846	0	dependent GO term
transcription from RNA polymerase II promoter	0.000849	0.222222	dependent GO term
negative regulation of intracellular steroid hormone receptor signaling pathway	0.00085	0	dependent GO term
cell cycle arrest	0.00085	0	dependent GO term
ncRNA processing	0.00085	0	dependent GO term
platelet activation	0.00085	0	dependent GO term
modification of morphology or physiology of other organism involved in symbiotic interaction	0.000853	0.166667	dependent GO term
lipid modification	0.000853	0.25	dependent GO term
G-protein coupled receptor signaling pathway	0.000854	0.25	dependent GO term
G-protein coupled receptor signaling pathway	0.000854	0.25	dependent GO term
G-protein coupled receptor signaling pathway	0.000854	0.25	dependent GO term
Fc receptor signaling pathway	0.000858	0	dependent GO term
protein modification by small protein conjugation	0.000864	0	dependent GO term
secretory granule organization	0.00088	0	dependent GO term
establishment of planar polarity involved in neural tube closure	0.00088	0	dependent GO term
cellular response to superoxide	0.00088	0.333333	dependent GO term
removal of superoxide radicals	0.00088	0.333333	dependent GO term
COPII-coated vesicle budding	0.00088	0	dependent GO term
COPII-coated vesicle budding	0.00088	0	dependent GO term
COPII-coated vesicle budding	0.00088	0	dependent GO term
regulation of ventricular cardiac muscle cell action potential	0.00088	0	dependent GO term
response to hypoxia	0.000882	0.333333	dependent GO term
positive regulation of nucleobase-containing compound metabolic process	0.000887	0	dependent GO term
wound healing	0.000889	0.571429	dependent GO term
negative regulation of apoptotic process	0.000894	0.25	dependent GO term
blood coagulation	0.000895	0	dependent GO term
positive regulation of signal transduction	0.0009	0.555556	dependent GO term
response to decreased oxygen levels	0.000904	0.333333	dependent GO term
phosphate-containing compound metabolic process	0.000912	0.555556	dependent GO term
regulation of Golgi inheritance	0.000917	0.333333	dependent GO term
regulation of NK T cell differentiation	0.000917	0	dependent GO term
positive regulation of NK T cell differentiation	0.000917	0	dependent GO term
positive regulation of kinase activity	0.000923	0.555556	dependent GO term
regulation of RNA metabolic process	0.000926	0	dependent GO term
G1/S transition of mitotic cell cycle	0.000926	0	dependent GO term
stem cell development	0.000926	0	dependent GO term
RNA splicing, via transesterification reactions with bulged adenosine as nucleophile	0.000926	0	dependent GO term
mRNA splicing, via spliceosome	0.000926	0	dependent GO term
cellular response to biotic stimulus	0.000927	0.2	dependent GO term
fertilization	0.000927	0.2	dependent GO term
small GTPase mediated signal transduction	0.000928	0.285714	dependent GO term
negative regulation of programmed cell death	0.00093	0.25	dependent GO term
cellular nitrogen compound metabolic process	0.000938	0.05	dependent GO term
regulation of apoptotic process	0.000938	0	dependent GO term
cell cycle checkpoint	0.00094	0	dependent GO term
negative regulation of ERBB signaling pathway	0.000941	0.2	dependent GO term
negative regulation of epidermal growth factor receptor signaling pathway	0.000941	0.2	dependent GO term
positive regulation of macromolecule biosynthetic process	0.000942	0	dependent GO term
hemostasis	0.000944	0	dependent GO term
regulation of primary metabolic process	0.000948	0	dependent GO term
negative regulation of apoptotic process	0.000955	0	dependent GO term
formation of primary germ layer	0.000967	0	dependent GO term
stress-activated MAPK cascade	0.000971	0	dependent GO term
regulation of programmed cell death	0.000981	0	dependent GO term
positive regulation of cell-matrix adhesion	0.000983	0	dependent GO term
RNA splicing, via transesterification reactions	0.000983	0	dependent GO term
endocardial cushion development	0.000983	0.333333	dependent GO term
regulation of dendritic spine development	0.000983	0.333333	dependent GO term
G-protein coupled receptor signaling pathway, coupled to cyclic nucleotide second messenger	0.000985	0.25	dependent GO term
G-protein coupled receptor signaling pathway, coupled to cyclic nucleotide second messenger	0.000985	0.25	dependent GO term
modification of morphology or physiology of other organism	0.000991	0.166667	dependent GO term
regulation of cell-cell adhesion mediated by integrin	0.000997	0.333333	dependent GO term
asymmetric cell division	0.000997	0	dependent GO term
establishment of planar polarity of embryonic epithelium	0.000997	0	dependent GO term
response to interferon-alpha	0.000997	0	dependent GO term
oocyte maturation	0.000997	0	dependent GO term
mineralocorticoid biosynthetic process	0.000997	0	dependent GO term
negative regulation of programmed cell death	0.001	0	dependent GO term
positive regulation of nitrogen compound metabolic process	0.00101	0	dependent GO term
actin polymerization or depolymerization	0.00101	0	dependent GO term
stress-activated protein kinase signaling cascade	0.00101	0	dependent GO term
regulation of phosphorylation	0.00102	0.555556	dependent GO term
microvillus assembly	0.00102	0.166667	dependent GO term
ureteric bud development	0.00102	0	dependent GO term
response to other organism	0.00102	0.2	dependent GO term
response to peptidoglycan	0.00102	0.2	dependent GO term
actin filament organization	0.00102	0	dependent GO term
Fc receptor signaling pathway	0.00102	0	dependent GO term
positive regulation of transferase activity	0.00103	0.555556	dependent GO term
synaptic transmission	0.00103	0	dependent GO term
regulation of blood coagulation	0.00103	0.571429	dependent GO term
DNA recombination	0.00103	0.333333	dependent GO term
DNA recombination	0.00103	0.333333	dependent GO term
RNA metabolic process	0.00104	0.05	dependent GO term
cellular biosynthetic process	0.00104	0.181818	dependent GO term
organelle localization	0.00104	0	dependent GO term
cellular response to hormone stimulus	0.00105	0.1	dependent GO term
negative regulation of RNA metabolic process	0.00105	0.222222	dependent GO term
positive regulation of RNA metabolic process	0.00105	0	dependent GO term
response to oxygen levels	0.00105	0.333333	dependent GO term
acetyl-CoA metabolic process	0.00105	0	dependent GO term
post-embryonic organ morphogenesis	0.00106	0.166667	dependent GO term
rRNA catabolic process	0.00106	0	dependent GO term
embryonic retina morphogenesis in camera-type eye	0.00106	0	dependent GO term
regulation of branching involved in prostate gland morphogenesis	0.00106	0	dependent GO term
presynaptic membrane assembly	0.00106	0	dependent GO term
transport	0.00107	0	dependent GO term
ubiquitin-dependent protein catabolic process	0.00107	0	dependent GO term
regulation of cellular metabolic process	0.00108	0	dependent GO term
posttranscriptional regulation of gene expression	0.00108	0	dependent GO term
cell cycle checkpoint	0.00109	0	dependent GO term
cell cycle checkpoint	0.00109	0	dependent GO term
cell cycle checkpoint	0.00109	0.333333	dependent GO term
negative regulation of cell death	0.0011	0.25	dependent GO term
cellular lipid catabolic process	0.00111	0.25	dependent GO term
actin nucleation	0.00112	0	dependent GO term
positive regulation of viral genome replication	0.00112	0	dependent GO term
retinol metabolic process	0.00112	0.666667	dependent GO term
lipid localization	0.00112	0.333333	dependent GO term
muscle cell fate commitment	0.00112	0	dependent GO term
cell communication by electrical coupling	0.00112	0	dependent GO term
mineralocorticoid metabolic process	0.00112	0	dependent GO term
cellular biogenic amine biosynthetic process	0.00112	0	dependent GO term
modification-dependent protein catabolic process	0.00113	0	dependent GO term
establishment of protein localization to organelle	0.00113	0	dependent GO term
establishment of protein localization to organelle	0.00113	0	dependent GO term
epithelial to mesenchymal transition	0.00115	0.166667	dependent GO term
intracellular receptor signaling pathway	0.00115	0	dependent GO term
intracellular receptor signaling pathway	0.00115	0	dependent GO term
DNA repair	0.00116	0.6	dependent GO term
modification-dependent macromolecule catabolic process	0.00116	0	dependent GO term
mRNA metabolic process	0.00116	0.25	dependent GO term
mRNA metabolic process	0.00116	0	dependent GO term
interaction with host	0.00117	0.166667	dependent GO term
lipid catabolic process	0.00117	0	dependent GO term
positive regulation of innate immune response	0.00118	0.333333	dependent GO term
male gonad development	0.00118	0.166667	dependent GO term
calcium ion transport	0.00118	0	dependent GO term
negative regulation of metabolic process	0.00119	0.222222	dependent GO term
positive regulation of signaling	0.0012	0.555556	dependent GO term
regulation of stem cell differentiation	0.0012	0.166667	dependent GO term
regulation of defense response	0.00121	0.333333	dependent GO term
odontogenesis	0.00121	0	dependent GO term
embryonic organ morphogenesis	0.00121	0	dependent GO term
positive regulation of cell communication	0.00122	0.555556	dependent GO term
regulation of axon extension involved in axon guidance	0.00122	0	dependent GO term
regulation of mRNA catabolic process	0.00122	0	dependent GO term
alpha-linolenic acid metabolic process	0.00122	0.25	dependent GO term
fatty acid beta-oxidation using acyl-CoA oxidase	0.00122	0.25	dependent GO term
MAPK cascade	0.00123	0.333333	dependent GO term
regulation of protein tyrosine kinase activity	0.00123	0.555556	dependent GO term
negative regulation of cell death	0.00123	0	dependent GO term
protein modification by small protein conjugation or removal	0.00124	0.25	dependent GO term
endosomal transport	0.00124	0	dependent GO term
protein modification by small protein conjugation or removal	0.00124	0.25	dependent GO term
RNA processing	0.00125	0	dependent GO term
neutral amino acid transport	0.00125	0	dependent GO term
protein localization to peroxisome	0.00125	0	dependent GO term
establishment of protein localization to peroxisome	0.00125	0	dependent GO term
protein targeting to peroxisome	0.00125	0	dependent GO term
convergent extension	0.00125	0	dependent GO term
negative regulation of Notch signaling pathway	0.00125	0	dependent GO term
protein localization to peroxisome	0.00125	0	dependent GO term
establishment of protein localization to peroxisome	0.00125	0	dependent GO term
protein targeting to peroxisome	0.00125	0	dependent GO term
dendritic cell chemotaxis	0.00125	0	dependent GO term
RNA methylation	0.00125	0	dependent GO term
regulation of cardiac muscle contraction by regulation of the release of sequestered calcium ion	0.00125	0	dependent GO term
neuromuscular synaptic transmission	0.00125	0	dependent GO term
amine biosynthetic process	0.00125	0	dependent GO term
regulation of protein metabolic process	0.00126	0.555556	dependent GO term
negative regulation of cell cycle phase transition	0.00126	0	dependent GO term
organic substance biosynthetic process	0.00127	0.181818	dependent GO term
regulation of immune response	0.00128	0.555556	dependent GO term
chaperone-mediated protein folding	0.00128	0	dependent GO term
activation of MAPKK activity	0.00129	0.333333	dependent GO term
cellular response to organic substance	0.00129	0.555556	dependent GO term
immune response-regulating cell surface receptor signaling pathway	0.00131	0	dependent GO term
regulation of osteoblast differentiation	0.00131	0	dependent GO term
mRNA metabolic process	0.00132	0	dependent GO term
cellular calcium ion homeostasis	0.00133	0.333333	dependent GO term
regulation of translation	0.00133	0	dependent GO term
cellular calcium ion homeostasis	0.00133	0	dependent GO term
positive regulation of cellular biosynthetic process	0.00134	0	dependent GO term
divalent metal ion transport	0.00134	0	dependent GO term
regulation of transcription from RNA polymerase II promoter	0.00136	0	dependent GO term
replication fork processing	0.00136	0.6	dependent GO term
regulation of transcription from RNA polymerase II promoter	0.00136	0	dependent GO term
regulation of cell proliferation involved in kidney development	0.00136	0	dependent GO term
proteolysis involved in cellular protein catabolic process	0.00136	0	dependent GO term
positive regulation of RNA splicing	0.00136	0	dependent GO term
presynaptic membrane organization	0.00136	0	dependent GO term
negative regulation of cell cycle phase transition	0.00136	0	dependent GO term
negative regulation of cell cycle phase transition	0.00136	0	dependent GO term
striated muscle cell differentiation	0.00136	0	dependent GO term
negative regulation of cell cycle phase transition	0.00136	0.333333	dependent GO term
striated muscle cell differentiation	0.00136	0	dependent GO term
regulation of release of cytochrome c from mitochondria	0.00136	0.333333	dependent GO term
single-organism catabolic process	0.00137	0	dependent GO term
small molecule catabolic process	0.00137	0	dependent GO term
macromolecule localization	0.00138	0	dependent GO term
intracellular steroid hormone receptor signaling pathway	0.00138	0.166667	dependent GO term
embryonic skeletal system development	0.00138	0	dependent GO term
negative regulation of molecular function	0.00138	0.25	dependent GO term
forebrain regionalization	0.00139	0	dependent GO term
exit from mitosis	0.00139	0	dependent GO term
nucleotide-excision repair, DNA gap filling	0.00139	0.333333	dependent GO term
proteasomal protein catabolic process	0.00139	0	dependent GO term
proteasomal protein catabolic process	0.00139	0.333333	dependent GO term
high-density lipoprotein particle remodeling	0.00139	0.333333	dependent GO term
regulation of heart rate by cardiac conduction	0.00139	0	dependent GO term
regulation of cardiac muscle contraction by calcium ion signaling	0.00139	0	dependent GO term
polyamine metabolic process	0.00139	0	dependent GO term
divalent inorganic cation transport	0.0014	0	dependent GO term
protein phosphorylation	0.00142	0.333333	dependent GO term
regulation of type I interferon production	0.00142	0	dependent GO term
cell surface receptor signaling pathway	0.00143	0.555556	dependent GO term
protein modification by small protein conjugation or removal	0.00143	0	dependent GO term
mitochondrion organization	0.00143	0	dependent GO term
inner cell mass cell proliferation	0.00144	0	dependent GO term
regulation of carbohydrate catabolic process	0.00144	0	dependent GO term
regulation of cellular carbohydrate catabolic process	0.00144	0	dependent GO term
pyruvate metabolic process	0.00144	0	dependent GO term
positive regulation of biosynthetic process	0.00145	0	dependent GO term
positive regulation of protein metabolic process	0.00148	0.555556	dependent GO term
regulation of carbohydrate metabolic process	0.0015	0	dependent GO term
secretion by cell	0.0015	0	dependent GO term
activation of immune response	0.00151	0	dependent GO term
interphase	0.00151	0.333333	dependent GO term
interphase	0.00151	0	dependent GO term
calcium ion homeostasis	0.00151	0.333333	dependent GO term
calcium ion homeostasis	0.00151	0	dependent GO term
immune response-activating cell surface receptor signaling pathway	0.00152	0	dependent GO term
enzyme linked receptor protein signaling pathway	0.00152	0.166667	dependent GO term
type I interferon production	0.00153	0	dependent GO term
positive regulation of pathway-restricted SMAD protein phosphorylation	0.00153	0.333333	dependent GO term
DNA replication	0.00154	0	dependent GO term
transmission of nerve impulse	0.00154	0.25	dependent GO term
viral process	0.00154	0.25	dependent GO term
peroxisomal transport	0.00154	0	dependent GO term
cranial nerve morphogenesis	0.00154	0	dependent GO term
response to superoxide	0.00154	0.333333	dependent GO term
peroxisomal transport	0.00154	0	dependent GO term
dendritic cell migration	0.00154	0	dependent GO term
muscle contraction	0.00154	0	dependent GO term
startle response	0.00154	0	dependent GO term
positive regulation of cytokine production	0.00155	0.25	dependent GO term
regulation of membrane potential	0.00155	0	dependent GO term
regulation of cellular macromolecule biosynthetic process	0.00156	0	dependent GO term
immune response-activating cell surface receptor signaling pathway	0.00157	0	dependent GO term
cellular response to peptide	0.00158	0	dependent GO term
cellular response to peptide hormone stimulus	0.00158	0	dependent GO term
cellular protein catabolic process	0.00158	0	dependent GO term
cellular divalent inorganic cation homeostasis	0.00158	0.333333	dependent GO term
cellular divalent inorganic cation homeostasis	0.00158	0	dependent GO term
chromatin modification	0.00159	0.222222	dependent GO term
cell-matrix adhesion	0.00159	0	dependent GO term
negative regulation of cellular macromolecule biosynthetic process	0.0016	0.222222	dependent GO term
leukocyte migration	0.0016	0	dependent GO term
nucleotide biosynthetic process	0.0016	0.333333	dependent GO term
positive regulation of reproductive process	0.00161	0	dependent GO term
organic substance transport	0.00162	0	dependent GO term
regulation of gene expression, epigenetic	0.00162	0	dependent GO term
negative regulation of molecular function	0.00163	0	dependent GO term
regulation of wound healing	0.00163	0.166667	dependent GO term
regulation of endothelial cell migration	0.00163	0.166667	dependent GO term
cell adhesion	0.00165	0.333333	dependent GO term
ATP metabolic process	0.00165	0.6	dependent GO term
myeloid leukocyte differentiation	0.00165	0	dependent GO term
nucleoside phosphate biosynthetic process	0.00165	0.333333	dependent GO term
insulin receptor signaling pathway	0.00166	0.1	dependent GO term
embryonic appendage morphogenesis	0.00169	0	dependent GO term
embryonic limb morphogenesis	0.00169	0	dependent GO term
cochlea morphogenesis	0.00169	0	dependent GO term
tRNA modification	0.00169	0	dependent GO term
synaptic transmission, cholinergic	0.00169	0	dependent GO term
negative regulation of gene expression	0.0017	0.222222	dependent GO term
ovulation from ovarian follicle	0.0017	0	dependent GO term
regulation of translational initiation in response to stress	0.0017	0	dependent GO term
glomerular mesangium development	0.0017	0	dependent GO term
protein localization to synapse	0.0017	0	dependent GO term
epidermis development	0.0017	0	dependent GO term
thioester biosynthetic process	0.0017	0	dependent GO term
acyl-CoA biosynthetic process	0.0017	0	dependent GO term
exocytosis	0.00171	0	dependent GO term
regulation of cellular protein metabolic process	0.00173	0	dependent GO term
multicellular organismal signaling	0.00173	0.25	dependent GO term
myeloid leukocyte mediated immunity	0.00176	0	dependent GO term
myeloid cell activation involved in immune response	0.00176	0	dependent GO term
positive regulation of response to external stimulus	0.00176	0.25	dependent GO term
stem cell differentiation	0.00177	0	dependent GO term
ribonucleoprotein complex biogenesis	0.00177	0	dependent GO term
nucleobase-containing compound metabolic process	0.00178	0.181818	dependent GO term
stress-activated MAPK cascade	0.00178	0.333333	dependent GO term
positive regulation of protein modification process	0.00178	0.25	dependent GO term
steroid metabolic process	0.0018	0.75	dependent GO term
divalent inorganic cation homeostasis	0.0018	0.333333	dependent GO term
divalent inorganic cation homeostasis	0.0018	0	dependent GO term
steroid metabolic process	0.0018	0	dependent GO term
peptidyl-tyrosine dephosphorylation	0.00184	0.1	dependent GO term
protein targeting to membrane	0.00185	0	dependent GO term
insulin receptor signaling pathway	0.00185	0.25	dependent GO term
insulin receptor signaling pathway	0.00185	0.25	dependent GO term
transmission of nerve impulse	0.00186	0	dependent GO term
negative regulation of cellular response to growth factor stimulus	0.00186	0.166667	dependent GO term
development of primary male sexual characteristics	0.00186	0.166667	dependent GO term
glucocorticoid biosynthetic process	0.00186	0	dependent GO term
stress-activated protein kinase signaling cascade	0.00187	0.333333	dependent GO term
negative regulation of nucleobase-containing compound metabolic process	0.00187	0.222222	dependent GO term
viral process	0.00187	0	dependent GO term
response to light stimulus	0.00187	0.666667	dependent GO term
branching morphogenesis of an epithelial tube	0.00188	0	dependent GO term
termination of G-protein coupled receptor signaling pathway	0.00189	0.25	dependent GO term
regulation of type I interferon-mediated signaling pathway	0.00189	0.333333	dependent GO term
histone modification	0.00189	0	dependent GO term
microvillus organization	0.0019	0.166667	dependent GO term
mesoderm development	0.00191	0	dependent GO term
vesicle-mediated transport	0.00193	0	dependent GO term
type I interferon biosynthetic process	0.00194	0.2	dependent GO term
negative regulation of cell cycle process	0.00194	0	dependent GO term
negative regulation of cell cycle process	0.00194	0	dependent GO term
negative regulation of cell cycle process	0.00194	0.333333	dependent GO term
fibroblast growth factor receptor signaling pathway	0.00195	0.25	dependent GO term
organelle localization	0.00196	0	dependent GO term
regulation of macromolecule biosynthetic process	0.00197	0	dependent GO term
negative regulation of cell differentiation	0.00197	0	dependent GO term
patterning of blood vessels	0.00199	0.333333	dependent GO term
negative regulation of nitrogen compound metabolic process	0.00202	0.222222	dependent GO term
negative regulation of cell cycle process	0.00202	0	dependent GO term
regulation of protein insertion into mitochondrial membrane involved in apoptotic signaling pathway	0.00202	0	dependent GO term
positive regulation of protein insertion into mitochondrial membrane involved in apoptotic signaling pathway	0.00202	0	dependent GO term
protein refolding	0.00202	0.333333	dependent GO term
cell-cell adhesion mediated by integrin	0.00202	0.333333	dependent GO term
protein localization to Golgi apparatus	0.00202	0	dependent GO term
plasma lipoprotein particle assembly	0.00202	0.333333	dependent GO term
regulation of T cell activation	0.00202	0	dependent GO term
macromolecular complex assembly	0.00204	0.125	dependent GO term
protein polymerization	0.00204	0	dependent GO term
positive regulation of nucleobase-containing compound metabolic process	0.00205	0	dependent GO term
cellular macromolecule catabolic process	0.00205	0.25	dependent GO term
cellular macromolecule catabolic process	0.00205	0	dependent GO term
regulation of cell cycle phase transition	0.00205	0	dependent GO term
regulation of cell cycle phase transition	0.00205	0	dependent GO term
regulation of cell cycle phase transition	0.00205	0.333333	dependent GO term
DNA metabolic process	0.00207	0.166667	dependent GO term
Fc-epsilon receptor signaling pathway	0.00207	0.25	dependent GO term
response to virus	0.00207	0	dependent GO term
receptor guanylyl cyclase signaling pathway	0.00208	0	dependent GO term
positive regulation of excitatory postsynaptic membrane potential	0.00208	0	dependent GO term
membrane assembly	0.00208	0	dependent GO term
regulation of N-methyl-D-aspartate selective glutamate receptor activity	0.00208	0	dependent GO term
organelle assembly	0.00209	0	dependent GO term
negative regulation of transmembrane receptor protein serine/threonine kinase signaling pathway	0.0021	0.166667	dependent GO term
covalent chromatin modification	0.00211	0	dependent GO term
positive regulation of immune system process	0.00212	0.2	dependent GO term
negative regulation of macromolecule biosynthetic process	0.00213	0.222222	dependent GO term
chromosome organization	0.00213	0.2	dependent GO term
myeloid cell differentiation	0.00213	0	dependent GO term
antigen processing and presentation of exogenous peptide antigen	0.00215	0	dependent GO term
multicellular organismal signaling	0.00216	0	dependent GO term
regulation of cell cycle phase transition	0.00217	0	dependent GO term
tissue morphogenesis	0.00219	0	dependent GO term
antigen processing and presentation of exogenous antigen	0.00219	0	dependent GO term
regulation of pathway-restricted SMAD protein phosphorylation	0.00219	0.333333	dependent GO term
positive regulation of macromolecule biosynthetic process	0.0022	0	dependent GO term
protein insertion into mitochondrial membrane involved in apoptotic signaling pathway	0.0022	0	dependent GO term
spindle localization	0.0022	0	dependent GO term
actin filament capping	0.0022	0	dependent GO term
telomere maintenance via semi-conservative replication	0.0022	0.333333	dependent GO term
lens morphogenesis in camera-type eye	0.0022	0	dependent GO term
negative regulation of lipid transport	0.0022	0.333333	dependent GO term
protein-lipid complex assembly	0.0022	0.333333	dependent GO term
amyloid precursor protein metabolic process	0.0022	0	dependent GO term
regulation of release of sequestered calcium ion into cytosol by sarcoplasmic reticulum	0.0022	0	dependent GO term
glutamate metabolic process	0.0022	0	dependent GO term
vesicle-mediated transport	0.00222	0.142857	dependent GO term
interspecies interaction between organisms	0.00222	0.25	dependent GO term
symbiosis, encompassing mutualism through parasitism	0.00222	0.25	dependent GO term
cerebral cortex radial glia guided migration	0.00222	0	dependent GO term
regulation of mRNA 3'-end processing	0.00222	0	dependent GO term
transport	0.00223	0	dependent GO term
positive regulation of protein modification process	0.00223	0	dependent GO term
cell cycle phase	0.00223	0.333333	dependent GO term
cell cycle phase	0.00223	0	dependent GO term
negative regulation of cellular metabolic process	0.00224	0	dependent GO term
male sex differentiation	0.00224	0.166667	dependent GO term
regulation of body fluid levels	0.00226	0	dependent GO term
collagen catabolic process	0.00226	0.125	dependent GO term
regulation of cysteine-type endopeptidase activity involved in apoptotic process	0.00227	0.25	dependent GO term
regulation of cysteine-type endopeptidase activity involved in apoptotic process	0.00227	0.25	dependent GO term
muscle system process	0.00227	0	dependent GO term
regulation of early endosome to late endosome transport	0.00229	0.333333	dependent GO term
NK T cell differentiation	0.00229	0	dependent GO term
termination of signal transduction	0.00229	0.25	dependent GO term
mRNA 3'-end processing	0.0023	0	dependent GO term
skin development	0.00235	0	dependent GO term
epithelial tube morphogenesis	0.00235	0	dependent GO term
epithelial tube morphogenesis	0.00235	0	dependent GO term
RNA biosynthetic process	0.00238	0	dependent GO term
negative regulation of macromolecule metabolic process	0.00238	0	dependent GO term
regulation of protein export from nucleus	0.00238	0	dependent GO term
protein insertion into mitochondrial membrane	0.00238	0	dependent GO term
regulation of interferon-gamma-mediated signaling pathway	0.00238	0.25	dependent GO term
antigen receptor-mediated signaling pathway	0.00238	0	dependent GO term
JAK-STAT cascade involved in growth hormone signaling pathway	0.00238	0	dependent GO term
negative regulation of lipid catabolic process	0.00238	0.333333	dependent GO term
negative regulation of endothelial cell proliferation	0.00238	0.333333	dependent GO term
positive regulation of nitrogen compound metabolic process	0.00239	0	dependent GO term
immune response-regulating signaling pathway	0.00241	0	dependent GO term
immune response-regulating signaling pathway	0.00241	0.555556	dependent GO term
adaptive immune response based on somatic recombination of immune receptors built from immunoglobulin superfamily domains	0.00243	0.5	dependent GO term
nucleobase-containing compound catabolic process	0.00243	0	dependent GO term
microtubule cytoskeleton organization	0.00243	0	dependent GO term
adaptive immune response based on somatic recombination of immune receptors built from immunoglobulin superfamily domains	0.00243	0	dependent GO term
negative regulation of cell adhesion mediated by integrin	0.00244	0.166667	dependent GO term
negative regulation of transcription from RNA polymerase II promoter	0.00245	0	dependent GO term
negative regulation of transcription from RNA polymerase II promoter	0.00245	0	dependent GO term
nuclear export	0.00247	0	dependent GO term
mitotic cell cycle	0.00247	0.2	dependent GO term
mitotic cell cycle	0.00247	0.25	dependent GO term
negative regulation of transcription from RNA polymerase II promoter	0.00249	0.222222	dependent GO term
regulation of viral process	0.00249	0	dependent GO term
modulation by virus of host process	0.0025	0.166667	dependent GO term
neuron cell-cell adhesion	0.0025	0	dependent GO term
translation	0.00252	0	dependent GO term
translation	0.00252	0	dependent GO term
blastocyst growth	0.00252	0	dependent GO term
ncRNA metabolic process	0.00254	0	dependent GO term
fatty acid metabolic process	0.00256	0.75	dependent GO term
wound healing	0.00257	0	dependent GO term
regulation of response to interferon-gamma	0.00257	0.25	dependent GO term
disruption of cells of other organism	0.00257	0	dependent GO term
killing of cells of other organism	0.00257	0	dependent GO term
telomere maintenance via recombination	0.00257	0.333333	dependent GO term
B cell homeostasis	0.00257	0	dependent GO term
vitamin D metabolic process	0.00257	0	dependent GO term
embryonic camera-type eye morphogenesis	0.00257	0	dependent GO term
protein K11-linked ubiquitination	0.00257	0.333333	dependent GO term
Golgi to plasma membrane protein transport	0.00257	0	dependent GO term
cellular response to alkaloid	0.00257	0	dependent GO term
secretion	0.00258	0	dependent GO term
negative regulation of cell cycle	0.00258	0	dependent GO term
negative regulation of cell cycle	0.00258	0.333333	dependent GO term
regulation of establishment of protein localization	0.00259	0.333333	dependent GO term
regulation of mitotic cell cycle	0.00261	0	dependent GO term
[truncated: 2,141 more rows]

## Sheet: cirrhotic
GO terms	Significance p-value	diseae enrichment ratio	GO term type
tachykinin receptor signaling pathway	6.1e-12	0	dependent GO term
protein deneddylation	6.72e-11	0.2	dependent GO term
cullin deneddylation	6.72e-11	0.2	dependent GO term
regulation of cellular amino acid metabolic process	4.46e-10	0	dependent GO term
spliceosomal snRNP assembly	6.73e-10	0.125	dependent GO term
intracellular steroid hormone receptor signaling pathway	7.21e-10	0.133333	dependent GO term
negative regulation of ubiquitin-protein ligase activity involved in mitotic cell cycle	8.48e-10	0	dependent GO term
signal transduction involved in mitotic cell cycle checkpoint	8.48e-10	0	dependent GO term
signal transduction involved in mitotic G1 DNA damage checkpoint	8.48e-10	0	dependent GO term
DNA damage response, signal transduction by p53 class mediator resulting in cell cycle arrest	8.48e-10	0	dependent GO term
signal transduction involved in DNA integrity checkpoint	9.01e-10	0	dependent GO term
signal transduction involved in DNA damage checkpoint	9.01e-10	0	dependent GO term
signal transduction involved in cell cycle checkpoint	9.56e-10	0	dependent GO term
cell-cell signaling	9.62e-10	0	dependent GO term
positive regulation of ubiquitin-protein ligase activity involved in mitotic cell cycle	1.14e-09	0	dependent GO term
negative regulation of ligase activity	1.34e-09	0	dependent GO term
negative regulation of ubiquitin-protein ligase activity	1.34e-09	0	dependent GO term
response to interleukin-15	1.36e-09	0	dependent GO term
G1 DNA damage checkpoint	1.42e-09	0	dependent GO term
mitotic G1 DNA damage checkpoint	1.42e-09	0	dependent GO term
regulation of cellular amine metabolic process	1.5e-09	0	dependent GO term
regulation of ubiquitin-protein ligase activity involved in mitotic cell cycle	1.58e-09	0	dependent GO term
immune response-regulating cell surface receptor signaling pathway involved in phagocytosis	1.76e-09	0	dependent GO term
Fc-gamma receptor signaling pathway	1.76e-09	0	dependent GO term
Fc-gamma receptor signaling pathway involved in phagocytosis	1.76e-09	0	dependent GO term
positive regulation of cell cycle arrest	1.95e-09	0	dependent GO term
anaphase-promoting complex-dependent proteasomal ubiquitin-dependent protein catabolic process	2.05e-09	0	dependent GO term
mitotic DNA damage checkpoint	2.05e-09	0	dependent GO term
Fc receptor mediated stimulatory signaling pathway	2.15e-09	0	dependent GO term
mitotic DNA integrity checkpoint	2.38e-09	0	dependent GO term
positive regulation of ubiquitin-protein ligase activity	2.38e-09	0	dependent GO term
positive regulation of ligase activity	2.88e-09	0	dependent GO term
immune response-activating cell surface receptor signaling pathway	3.14e-09	0	dependent GO term
negative regulation of G1/S transition of mitotic cell cycle	3.47e-09	0	dependent GO term
ciliary neurotrophic factor-mediated signaling pathway	3.56e-09	0	dependent GO term
immunoglobulin V(D)J recombination	3.56e-09	0.333333	dependent GO term
regulation of cell cycle arrest	3.97e-09	0	dependent GO term
regulation of ubiquitin-protein ligase activity	5.14e-09	0	dependent GO term
negative regulation of protein ubiquitination	5.36e-09	0	dependent GO term
immune response-regulating cell surface receptor signaling pathway	5.68e-09	0	dependent GO term
regulation of ligase activity	6.07e-09	0	dependent GO term
trivalent inorganic cation transport	6.43e-09	0	dependent GO term
ferric iron transport	6.43e-09	0	dependent GO term
transferrin transport	6.43e-09	0	dependent GO term
DNA damage response, signal transduction by p53 class mediator	7.4e-09	0	dependent GO term
synaptic transmission	9.37e-09	0	dependent GO term
regulation of G1/S transition of mitotic cell cycle	1.16e-08	0	dependent GO term
signal transduction in response to DNA damage	1.16e-08	0	dependent GO term
dendritic cell dendrite assembly	1.31e-08	0	dependent GO term
regulation of dendritic cell dendrite assembly	1.31e-08	0	dependent GO term
regulation of leukocyte migration	1.69e-08	0	dependent GO term
antigen processing and presentation of exogenous peptide antigen via MHC class I, TAP-dependent	1.75e-08	0	dependent GO term
antigen receptor-mediated signaling pathway	1.8e-08	0	dependent GO term
antigen processing and presentation of exogenous peptide antigen via MHC class I	1.99e-08	0	dependent GO term
platelet dense granule organization	1.99e-08	0	dependent GO term
positive regulation of protein ubiquitination	2.33e-08	0	dependent GO term
RNA splicing, via transesterification reactions	2.48e-08	0.125	dependent GO term
DNA damage checkpoint	2.48e-08	0	dependent GO term
mitotic cell cycle checkpoint	2.64e-08	0	dependent GO term
MAPK cascade	2.71e-08	0.181818	dependent GO term
transmission of nerve impulse	3.05e-08	0	dependent GO term
DNA integrity checkpoint	3.06e-08	0	dependent GO term
signal transduction by p53 class mediator	3.24e-08	0	dependent GO term
phagosome maturation	3.44e-08	0	dependent GO term
positive regulation of saliva secretion	3.59e-08	0	dependent GO term
regulation of cellular ketone metabolic process	4.07e-08	0	dependent GO term
multicellular organismal signaling	4.12e-08	0	dependent GO term
iron ion transport	4.54e-08	0	dependent GO term
negative regulation of mitotic cell cycle phase transition	4.55e-08	0	dependent GO term
antigen processing and presentation of peptide antigen via MHC class I	4.67e-08	0	dependent GO term
intracellular estrogen receptor signaling pathway	4.68e-08	0.133333	dependent GO term
myeloid dendritic cell chemotaxis	5.25e-08	0	dependent GO term
phagocytosis	5.48e-08	0	dependent GO term
pro-B cell differentiation	5.87e-08	0.333333	dependent GO term
blood coagulation	6.14e-08	0.181818	dependent GO term
regulation of Rho protein signal transduction	6.23e-08	0	dependent GO term
regulation of saliva secretion	6.29e-08	0	dependent GO term
immune response-regulating signaling pathway	6.41e-08	0	dependent GO term
complement activation, alternative pathway	6.43e-08	0.111111	dependent GO term
coagulation	6.5e-08	0.181818	dependent GO term
hemostasis	6.68e-08	0.181818	dependent GO term
protein polyubiquitination	6.73e-08	0	dependent GO term
immune response-regulating cell surface receptor signaling pathway	6.91e-08	0	dependent GO term
immune response-activating signal transduction	8.12e-08	0	dependent GO term
leukocyte chemotaxis	8.54e-08	0	dependent GO term
positive regulation of cell cycle process	8.59e-08	0	dependent GO term
keratinization	8.7e-08	0	dependent GO term
V(D)J recombination	1.02e-07	0.333333	dependent GO term
translational termination	1.07e-07	0	dependent GO term
brain development	1.14e-07	0	dependent GO term
regulation of protein ubiquitination	1.14e-07	0	dependent GO term
cellular amine metabolic process	1.16e-07	0	dependent GO term
establishment of lymphocyte polarity	1.31e-07	0	dependent GO term
establishment of T cell polarity	1.31e-07	0	dependent GO term
immunological synapse formation	1.31e-07	0	dependent GO term
proton transport	1.31e-07	0	dependent GO term
cellular ketone metabolic process	1.36e-07	0	dependent GO term
amine metabolic process	1.39e-07	0	dependent GO term
regulation of mitotic cell cycle phase transition	1.42e-07	0	dependent GO term
protein homooligomerization	1.45e-07	0	dependent GO term
cellular iron ion homeostasis	1.45e-07	0	dependent GO term
hydrogen transport	1.45e-07	0	dependent GO term
toll-like receptor signaling pathway	1.56e-07	0	dependent GO term
Rho protein signal transduction	1.61e-07	0	dependent GO term
cell cycle arrest	1.79e-07	0	dependent GO term
neurological system process	1.96e-07	0	dependent GO term
SRP-dependent cotranslational protein targeting to membrane	1.99e-07	0	dependent GO term
postreplication repair	1.99e-07	0	dependent GO term
anterograde synaptic vesicle transport	1.99e-07	0	dependent GO term
secretory granule organization	1.99e-07	0	dependent GO term
system process	2.03e-07	0	dependent GO term
G1/S transition of mitotic cell cycle	2.06e-07	0	dependent GO term
cell chemotaxis	2.11e-07	0	dependent GO term
cotranslational protein targeting to membrane	2.15e-07	0	dependent GO term
positive regulation of digestive system process	2.16e-07	0	dependent GO term
protein targeting to ER	2.32e-07	0	dependent GO term
cell cycle process	2.37e-07	0.375	independent GO term
establishment of protein localization to endoplasmic reticulum	2.41e-07	0	dependent GO term
Fc receptor signaling pathway	2.42e-07	0	dependent GO term
formation of translation preinitiation complex	2.42e-07	0	dependent GO term
cell cycle checkpoint	2.71e-07	0	dependent GO term
regulation of body fluid levels	2.74e-07	0.181818	dependent GO term
translational elongation	2.79e-07	0	dependent GO term
activation of immune response	2.82e-07	0	dependent GO term
intracellular receptor signaling pathway	2.83e-07	0.133333	dependent GO term
pattern recognition receptor signaling pathway	2.89e-07	0	dependent GO term
melanosome organization	2.9e-07	0	dependent GO term
double-strand break repair via nonhomologous end joining	2.9e-07	0.333333	dependent GO term
lymphoid progenitor cell differentiation	2.9e-07	0.333333	dependent GO term
insulin receptor signaling pathway	3.14e-07	0.333333	dependent GO term
RNA splicing	3.15e-07	0.125	dependent GO term
innate immune response-activating signal transduction	3.32e-07	0	dependent GO term
nuclear-transcribed mRNA catabolic process, nonsense-mediated decay	3.34e-07	0	dependent GO term
wound healing	3.37e-07	0.181818	dependent GO term
fibroblast growth factor receptor signaling pathway	3.41e-07	0.333333	dependent GO term
pigment granule organization	3.45e-07	0	dependent GO term
transmembrane receptor protein tyrosine kinase signaling pathway	3.66e-07	0	dependent GO term
Fc-epsilon receptor signaling pathway	3.79e-07	0.333333	dependent GO term
negative regulation of cell cycle phase transition	3.91e-07	0	dependent GO term
protein carboxylation	3.95e-07	0.25	dependent GO term
peptidyl-glutamic acid carboxylation	3.95e-07	0.25	dependent GO term
protein localization to endoplasmic reticulum	3.97e-07	0	dependent GO term
activation of innate immune response	3.99e-07	0	dependent GO term
iron ion homeostasis	4e-07	0	dependent GO term
proteasomal protein catabolic process	4.05e-07	0	dependent GO term
regulation of leukocyte activation	4.55e-07	0	dependent GO term
positive regulation of dendritic cell antigen processing and presentation	4.59e-07	0	dependent GO term
phospholipid homeostasis	4.62e-07	0.4	dependent GO term
interphase	4.65e-07	0	dependent GO term
complement activation, alternative pathway	4.73e-07	0.666667	dependent GO term
ribonucleoprotein complex assembly	4.84e-07	0.125	dependent GO term
transition metal ion transport	4.84e-07	0	dependent GO term
cytosolic calcium ion homeostasis	4.89e-07	0	dependent GO term
immune response-activating cell surface receptor signaling pathway	4.98e-07	0	dependent GO term
cellular transition metal ion homeostasis	5.41e-07	0	dependent GO term
non-recombinational repair	5.48e-07	0.333333	dependent GO term
immune response-regulating signaling pathway	5.95e-07	0	dependent GO term
cellular response to fibroblast growth factor stimulus	5.95e-07	0.333333	dependent GO term
ribonucleoprotein complex subunit organization	6.05e-07	0.125	dependent GO term
positive regulation of sequence-specific DNA binding transcription factor activity	6.18e-07	0	dependent GO term
saliva secretion	6.54e-07	0	dependent GO term
negative regulation of cell cycle process	7.12e-07	0	dependent GO term
T cell receptor signaling pathway	7.13e-07	0	dependent GO term
rRNA processing	7.15e-07	0	dependent GO term
anterograde axon cargo transport	7.2e-07	0	dependent GO term
regulation of cell activation	7.29e-07	0	dependent GO term
inositol lipid-mediated signaling	7.35e-07	0.333333	dependent GO term
phosphatidylinositol-mediated signaling	7.35e-07	0.333333	dependent GO term
dendritic cell antigen processing and presentation	7.35e-07	0	dependent GO term
regulation of dendritic cell antigen processing and presentation	7.35e-07	0	dependent GO term
regulation of Ras protein signal transduction	7.46e-07	0	dependent GO term
regulation of cell cycle phase transition	7.82e-07	0	dependent GO term
positive regulation of leukocyte chemotaxis	8.07e-07	0	dependent GO term
cellular component disassembly	8.28e-07	0	dependent GO term
antigen processing and presentation of exogenous peptide antigen	8.44e-07	0	dependent GO term
antigen processing and presentation of exogenous antigen	8.69e-07	0	dependent GO term
rRNA metabolic process	8.72e-07	0	dependent GO term
cellular response to insulin stimulus	8.81e-07	0.333333	dependent GO term
cell cycle phase	8.96e-07	0	dependent GO term
regulation of MAPK cascade	9.04e-07	0.181818	dependent GO term
positive regulation of innate immune response	9.41e-07	0	dependent GO term
epidermal growth factor receptor signaling pathway	9.41e-07	0.333333	dependent GO term
ERBB signaling pathway	9.83e-07	0.333333	dependent GO term
central nervous system development	1e-06	0	dependent GO term
lymphocyte activation	1.01e-06	0	dependent GO term
ncRNA catabolic process	1.01e-06	0	dependent GO term
taxis	1.07e-06	0	dependent GO term
chemotaxis	1.07e-06	0	dependent GO term
response to wounding	1.09e-06	0.181818	dependent GO term
protein modification by small protein removal	1.13e-06	0.2	dependent GO term
negative regulation of cell cycle	1.15e-06	0	dependent GO term
regulation of mitotic cell cycle	1.16e-06	0	dependent GO term
mRNA processing	1.18e-06	0.125	dependent GO term
protein targeting to membrane	1.18e-06	0	dependent GO term
antigen processing and presentation of peptide antigen	1.25e-06	0	dependent GO term
viral transcription	1.28e-06	0	dependent GO term
transition metal ion homeostasis	1.3e-06	0	dependent GO term
cellular protein complex disassembly	1.43e-06	0	dependent GO term
regulation of cytokine-mediated signaling pathway	1.51e-06	0	dependent GO term
cellular response to interleukin-15	1.57e-06	0	dependent GO term
regulation of leukocyte chemotaxis	1.64e-06	0	dependent GO term
intracellular signal transduction	1.71e-06	0	dependent GO term
translational initiation	1.71e-06	0	independent GO term
Fc receptor signaling pathway	1.71e-06	0.333333	dependent GO term
protein oligomerization	1.73e-06	0	dependent GO term
negative regulation of protein modification process	1.92e-06	0	dependent GO term
protein complex disassembly	1.93e-06	0	dependent GO term
cell cycle	1.94e-06	0.375	independent GO term
regulation of MAP kinase activity	2.01e-06	0.181818	dependent GO term
regulation of response to cytokine stimulus	2.13e-06	0	dependent GO term
antigen processing and presentation	2.15e-06	0	dependent GO term
neurotrophin signaling pathway	2.18e-06	0.181818	dependent GO term
regulation of actin filament polymerization	2.44e-06	0	dependent GO term
positive regulation of immune response	2.48e-06	0	dependent GO term
cellular calcium ion homeostasis	2.67e-06	0	dependent GO term
mitotic spindle assembly checkpoint	2.76e-06	0.333333	dependent GO term
mitotic cell cycle	2.84e-06	0.375	dependent GO term
positive regulation of leukocyte migration	2.85e-06	0	dependent GO term
regulation of small GTPase mediated signal transduction	2.85e-06	0	dependent GO term
positive regulation of glycoprotein biosynthetic process	2.89e-06	0	dependent GO term
protein targeting	2.95e-06	0	dependent GO term
negative regulation of metaphase/anaphase transition of cell cycle	3e-06	0.333333	dependent GO term
spindle assembly checkpoint	3e-06	0.333333	dependent GO term
negative regulation of mitotic metaphase/anaphase transition	3e-06	0.333333	dependent GO term
DNA biosynthetic process	3e-06	0	dependent GO term
hematopoietic progenitor cell differentiation	3e-06	0.333333	independent GO term
nuclear-transcribed mRNA poly(A) tail shortening	3e-06	0	dependent GO term
nuclear-transcribed mRNA catabolic process	3.1e-06	0	dependent GO term
cellular pigmentation	3.25e-06	0	dependent GO term
neurotrophin TRK receptor signaling pathway	3.29e-06	0.333333	dependent GO term
calcium ion homeostasis	3.29e-06	0	dependent GO term
neurotrophin signaling pathway	3.35e-06	0.333333	dependent GO term
leukocyte activation	3.39e-06	0	dependent GO term
macromolecular complex disassembly	3.39e-06	0	dependent GO term
immune response-regulating cell surface receptor signaling pathway	3.47e-06	0	dependent GO term
mitotic spindle checkpoint	3.51e-06	0.333333	dependent GO term
cellular divalent inorganic cation homeostasis	3.58e-06	0	dependent GO term
peptidyl-glutamic acid modification	3.63e-06	0.25	dependent GO term
leukocyte migration	3.64e-06	0	dependent GO term
cellular response to peptide	3.7e-06	0.333333	dependent GO term
cellular response to peptide hormone stimulus	3.7e-06	0.333333	dependent GO term
regulation of innate immune response	3.76e-06	0	dependent GO term
Ras protein signal transduction	3.76e-06	0	dependent GO term
cytolysis	3.79e-06	0.666667	independent GO term
axon cargo transport	3.79e-06	0	dependent GO term
immune response-activating signal transduction	3.85e-06	0	dependent GO term
positive regulation of defense response	3.95e-06	0	dependent GO term
mitotic cell cycle phase transition	4.02e-06	0	dependent GO term
insulin receptor signaling pathway	4.11e-06	0	dependent GO term
ribosome biogenesis	4.11e-06	0	dependent GO term
regulation of actin polymerization or depolymerization	4.22e-06	0	dependent GO term
keratinocyte differentiation	4.36e-06	0	dependent GO term
regulation of actin filament length	4.36e-06	0	dependent GO term
regulation of pathway-restricted SMAD protein phosphorylation	4.39e-06	0	dependent GO term
signaling	4.4e-06	0	independent GO term
single organism signaling	4.4e-06	0	dependent GO term
divalent inorganic cation homeostasis	4.43e-06	0	dependent GO term
positive regulation of chemotaxis	4.63e-06	0	dependent GO term
actin filament polymerization	4.67e-06	0	dependent GO term
regulation of digestive system process	4.67e-06	0	dependent GO term
mRNA catabolic process	4.86e-06	0	dependent GO term
ubiquitin-dependent protein catabolic process	4.94e-06	0	dependent GO term
negative regulation of nuclear division	5.05e-06	0.333333	dependent GO term
negative regulation of mitosis	5.05e-06	0.333333	dependent GO term
response to gamma radiation	5.05e-06	0.333333	dependent GO term
somatic recombination of immunoglobulin gene segments	5.05e-06	0.333333	dependent GO term
regulation of apoptotic process	5.1e-06	0.285714	dependent GO term
regulation of protein polymerization	5.15e-06	0	dependent GO term
modification-dependent protein catabolic process	5.27e-06	0	dependent GO term
endocytosis	5.32e-06	0	dependent GO term
regulation of metaphase/anaphase transition of cell cycle	5.4e-06	0.333333	dependent GO term
regulation of mitotic metaphase/anaphase transition	5.4e-06	0.333333	dependent GO term
regulation of programmed cell death	5.43e-06	0.285714	dependent GO term
RNA splicing, via transesterification reactions with bulged adenosine as nucleophile	5.49e-06	0.125	dependent GO term
mRNA splicing, via spliceosome	5.49e-06	0.125	dependent GO term
modification-dependent macromolecule catabolic process	5.49e-06	0	dependent GO term
protein localization to organelle	5.67e-06	0	dependent GO term
positive regulation of NF-kappaB transcription factor activity	5.72e-06	0	dependent GO term
actin cytoskeleton organization	5.72e-06	0	dependent GO term
metaphase/anaphase transition of cell cycle	5.77e-06	0.333333	dependent GO term
spindle checkpoint	5.77e-06	0.333333	dependent GO term
metaphase/anaphase transition of mitotic cell cycle	5.77e-06	0.333333	dependent GO term
pathway-restricted SMAD protein phosphorylation	5.77e-06	0	dependent GO term
DNA excision	5.88e-06	0	dependent GO term
nucleotide-excision repair, DNA damage removal	5.88e-06	0	dependent GO term
type I interferon biosynthetic process	5.97e-06	0	dependent GO term
cell communication	6.13e-06	0	independent GO term
regulation of protein activation cascade	6.55e-06	0.666667	dependent GO term
regulation of complement activation	6.55e-06	0.666667	dependent GO term
DNA replication initiation	6.56e-06	0	dependent GO term
proteolysis involved in cellular protein catabolic process	6.67e-06	0	dependent GO term
regulation of cell death	6.72e-06	0.285714	dependent GO term
regulation of cell cycle process	6.74e-06	0	dependent GO term
regulation of immune system process	6.88e-06	0	dependent GO term
regulation of protein kinase activity	6.89e-06	0.181818	dependent GO term
MyD88-dependent toll-like receptor signaling pathway	7.13e-06	0	dependent GO term
Clara cell differentiation	7.26e-06	0	dependent GO term
positive regulation of cellular pH reduction	7.26e-06	0	dependent GO term
negative regulation of cellular protein metabolic process	7.29e-06	0	dependent GO term
energy coupled proton transmembrane transport, against electrochemical gradient	7.29e-06	0	dependent GO term
ATP hydrolysis coupled proton transport	7.29e-06	0	dependent GO term
positive regulation of neutrophil chemotaxis	7.34e-06	0	dependent GO term
substrate-dependent cerebral cortex tangential migration	7.34e-06	0.333333	dependent GO term
cerebral cortex tangential migration using cell-cell interactions	7.34e-06	0.333333	dependent GO term
postnatal olfactory bulb interneuron migration	7.34e-06	0.333333	dependent GO term
chemorepulsion involved in postnatal olfactory bulb interneuron migration	7.34e-06	0.333333	dependent GO term
cytidine to uridine editing	7.34e-06	0	dependent GO term
transmembrane receptor protein tyrosine kinase signaling pathway	7.39e-06	0.181818	dependent GO term
establishment of protein localization to organelle	7.62e-06	0	dependent GO term
extracellular matrix organization	7.65e-06	0.363636	dependent GO term
positive regulation of behavior	7.74e-06	0	dependent GO term
extracellular structure organization	7.77e-06	0.363636	dependent GO term
cellular protein catabolic process	8.04e-06	0	dependent GO term
cellular amino acid metabolic process	8.2e-06	0	dependent GO term
somatic diversification of immunoglobulins	8.33e-06	0.333333	dependent GO term
somatic cell DNA recombination	8.33e-06	0.333333	dependent GO term
somatic diversification of immune receptors via germline recombination within a single locus	8.33e-06	0.333333	dependent GO term
activation of immune response	8.43e-06	0	dependent GO term
RNA catabolic process	8.52e-06	0	dependent GO term
protein dephosphorylation	8.72e-06	0.181818	dependent GO term
myeloid cell activation involved in immune response	8.82e-06	0	dependent GO term
enzyme linked receptor protein signaling pathway	8.88e-06	0	dependent GO term
positive regulation of antigen processing and presentation	8.91e-06	0	dependent GO term
regulation of immune response	9.35e-06	0	dependent GO term
cell cycle phase transition	9.36e-06	0	dependent GO term
cellular response to insulin stimulus	9.38e-06	0	dependent GO term
regulation of kinase activity	9.6e-06	0.181818	dependent GO term
regulation of lymphocyte activation	9.87e-06	0	dependent GO term
diencephalon development	1.04e-05	0	independent GO term
G-protein coupled receptor signaling pathway	1.04e-05	0.142857	dependent GO term
G-protein coupled receptor signaling pathway	1.04e-05	0	dependent GO term
phagosome maturation	1.04e-05	0	dependent GO term
positive regulation of granulocyte chemotaxis	1.07e-05	0	dependent GO term
actin polymerization or depolymerization	1.1e-05	0	dependent GO term
integrin-mediated signaling pathway	1.11e-05	0.285714	dependent GO term
reverse cholesterol transport	1.11e-05	0.4	dependent GO term
lipopolysaccharide-mediated signaling pathway	1.16e-05	0.333333	dependent GO term
cellular ion homeostasis	1.17e-05	0	dependent GO term
regulation of transferase activity	1.18e-05	0.181818	dependent GO term
actin filament-based process	1.19e-05	0	independent GO term
somatic diversification of immune receptors	1.22e-05	0.333333	dependent GO term
ncRNA processing	1.25e-05	0	dependent GO term
dendritic cell chemotaxis	1.27e-05	0	dependent GO term
exonucleolytic nuclear-transcribed mRNA catabolic process involved in deadenylation-dependent decay	1.28e-05	0	dependent GO term
positive regulation of Ras GTPase activity	1.31e-05	0	dependent GO term
response to peptide	1.35e-05	0.333333	dependent GO term
immune response-regulating signaling pathway	1.35e-05	0	dependent GO term
positive regulation of epidermal growth factor receptor signaling pathway	1.39e-05	0	dependent GO term
nuclear-transcribed mRNA catabolic process, exonucleolytic	1.39e-05	0	dependent GO term
negative regulation of protein metabolic process	1.45e-05	0	dependent GO term
regulation of cellular pH reduction	1.45e-05	0	dependent GO term
maternal aggressive behavior	1.45e-05	0	dependent GO term
negative regulation of female receptivity	1.45e-05	0	dependent GO term
regulation of antigen processing and presentation	1.49e-05	0	dependent GO term
cellular metal ion homeostasis	1.52e-05	0	dependent GO term
positive regulation of immune system process	1.6e-05	0	dependent GO term
ribonucleoprotein complex biogenesis	1.61e-05	0.125	dependent GO term
regulation of chemotaxis	1.61e-05	0	dependent GO term
leukocyte activation	1.64e-05	0	dependent GO term
mRNA metabolic process	1.65e-05	0.125	dependent GO term
positive regulation of ERBB signaling pathway	1.69e-05	0	dependent GO term
dendritic cell migration	1.74e-05	0	dependent GO term
epidermal cell differentiation	1.74e-05	0	dependent GO term
cellular response to organonitrogen compound	1.78e-05	0.333333	dependent GO term
positive regulation of secretion	1.8e-05	0	dependent GO term
regulation of protein serine/threonine kinase activity	1.82e-05	0.181818	dependent GO term
RNA processing	1.83e-05	0.125	dependent GO term
negative regulation of catalytic activity	1.84e-05	0	dependent GO term
neutrophil aggregation	1.85e-05	0.25	dependent GO term
kinin cascade	1.85e-05	0.5	dependent GO term
plasma kallikrein-kinin cascade	1.85e-05	0.5	dependent GO term
Factor XII activation	1.85e-05	0.5	dependent GO term
regulation of excitatory postsynaptic membrane potential	1.91e-05	0	dependent GO term
cellular response to hormone stimulus	1.96e-05	0.333333	dependent GO term
regulation of neutrophil chemotaxis	2.02e-05	0	dependent GO term
cellular cation homeostasis	2.18e-05	0	dependent GO term
Roundabout signaling pathway	2.2e-05	0.333333	dependent GO term
transcription initiation from mitochondrial promoter	2.2e-05	0	dependent GO term
detection of lipopolysaccharide	2.2e-05	0.333333	dependent GO term
sequestering of TGFbeta in extracellular matrix	2.2e-05	0.333333	dependent GO term
complement activation, classical pathway	2.21e-05	0.666667	dependent GO term
complement activation, classical pathway	2.21e-05	0	dependent GO term
regulation of sequestering of calcium ion	2.21e-05	0	dependent GO term
negative regulation of sequestering of calcium ion	2.21e-05	0	dependent GO term
release of sequestered calcium ion into cytosol	2.21e-05	0	dependent GO term
regulation of sequence-specific DNA binding transcription factor activity	2.26e-05	0	dependent GO term
regulation of protein processing	2.31e-05	0.666667	dependent GO term
establishment of synaptic vesicle localization	2.31e-05	0	dependent GO term
synaptic vesicle transport	2.31e-05	0	dependent GO term
nuclear-transcribed mRNA catabolic process, deadenylation-dependent decay	2.31e-05	0	dependent GO term
protein catabolic process	2.35e-05	0	dependent GO term
regulation of cellular amino acid metabolic process	2.4e-05	0	dependent GO term
blood coagulation, extrinsic pathway	2.42e-05	0	dependent GO term
positive regulation of glutamate secretion	2.42e-05	0	dependent GO term
positive regulation of unsaturated fatty acid biosynthetic process	2.42e-05	0	dependent GO term
positive regulation of prostaglandin biosynthetic process	2.42e-05	0	dependent GO term
immune response-regulating cell surface receptor signaling pathway	2.44e-05	0.333333	dependent GO term
protein ubiquitination	2.44e-05	0	dependent GO term
protein ubiquitination	2.44e-05	0	dependent GO term
sequestering of calcium ion	2.5e-05	0	dependent GO term
T cell differentiation in thymus	2.5e-05	0.333333	dependent GO term
viral process	2.51e-05	0	dependent GO term
cellular response to nitrogen compound	2.53e-05	0.333333	dependent GO term
Fc receptor signaling pathway	2.54e-05	0	dependent GO term
synaptic vesicle localization	2.6e-05	0	dependent GO term
gene silencing by RNA	2.6e-05	0	dependent GO term
cellular chemical homeostasis	2.61e-05	0	dependent GO term
immune response-activating signal transduction	2.7e-05	0	dependent GO term
toll-like receptor TLR6:TLR2 signaling pathway	2.71e-05	0.333333	dependent GO term
toll-like receptor TLR1:TLR2 signaling pathway	2.71e-05	0.333333	dependent GO term
complement activation	2.72e-05	0.111111	dependent GO term
regulation of postsynaptic membrane potential	2.72e-05	0	dependent GO term
regulation of translational initiation	2.81e-05	0	dependent GO term
protein polymerization	2.85e-05	0	dependent GO term
DNA replication	2.88e-05	0.5	dependent GO term
DNA replication	2.88e-05	0	dependent GO term
metal ion homeostasis	2.89e-05	0	dependent GO term
microtubule-based transport	2.92e-05	0	dependent GO term
positive regulation of type I interferon production	2.92e-05	0	dependent GO term
ncRNA metabolic process	2.94e-05	0.125	dependent GO term
cellular response to peptide	2.96e-05	0	dependent GO term
cellular response to peptide hormone stimulus	2.96e-05	0	dependent GO term
regulation of sterol transport	3e-05	0.4	dependent GO term
regulation of cholesterol transport	3e-05	0.4	dependent GO term
positive regulation of phosphatidylinositol 3-kinase activity	3.01e-05	0	dependent GO term
regulation of cell migration	3.02e-05	0	dependent GO term
hormone metabolic process	3.03e-05	0	dependent GO term
TRIF-dependent toll-like receptor signaling pathway	3.03e-05	0.333333	dependent GO term
pattern recognition receptor signaling pathway	3.1e-05	0	dependent GO term
intracellular protein transport	3.1e-05	0	dependent GO term
regulation of humoral immune response	3.15e-05	0.666667	dependent GO term
cell activation	3.17e-05	0	independent GO term
ion homeostasis	3.22e-05	0	dependent GO term
single-multicellular organism process	3.24e-05	0	dependent GO term
ribonucleoprotein complex biogenesis	3.33e-05	0	dependent GO term
positive regulation of immune response	3.35e-05	0	dependent GO term
protein modification by small protein conjugation	3.37e-05	0	dependent GO term
protein modification by small protein conjugation	3.37e-05	0	dependent GO term
toll-like receptor 2 signaling pathway	3.39e-05	0.333333	dependent GO term
positive regulation of lipid kinase activity	3.41e-05	0	dependent GO term
protein carboxylation	3.43e-05	0.181818	dependent GO term
peptidyl-glutamic acid carboxylation	3.43e-05	0.181818	dependent GO term
toll-like receptor 10 signaling pathway	3.5e-05	0.181818	dependent GO term
negative regulation of ubiquitin-protein ligase activity involved in mitotic cell cycle	3.51e-05	0.333333	dependent GO term
MyD88-independent toll-like receptor signaling pathway	3.51e-05	0.333333	dependent GO term
signal transduction involved in mitotic cell cycle checkpoint	3.51e-05	0	dependent GO term
signal transduction involved in mitotic G1 DNA damage checkpoint	3.51e-05	0	dependent GO term
DNA damage response, signal transduction by p53 class mediator resulting in cell cycle arrest	3.51e-05	0	dependent GO term
negative regulation of ubiquitin-protein ligase activity involved in mitotic cell cycle	3.51e-05	0	dependent GO term
synaptic transmission, glutamatergic	3.52e-05	0	dependent GO term
glutamate receptor signaling pathway	3.52e-05	0	dependent GO term
apoptotic process	3.55e-05	0.285714	dependent GO term
innate immune response-activating signal transduction	3.56e-05	0	dependent GO term
monovalent inorganic cation transport	3.59e-05	0	dependent GO term
small GTPase mediated signal transduction	3.62e-05	0	dependent GO term
Type II pneumocyte differentiation	3.63e-05	0	dependent GO term
nuclear pore complex assembly	3.63e-05	0	dependent GO term
regulation of unsaturated fatty acid biosynthetic process	3.63e-05	0	dependent GO term
regulation of prostaglandin biosynthetic process	3.63e-05	0	dependent GO term
signal transduction involved in DNA integrity checkpoint	3.64e-05	0	dependent GO term
signal transduction involved in DNA damage checkpoint	3.64e-05	0	dependent GO term
sequestering of metal ion	3.64e-05	0	dependent GO term
positive regulation of RNA metabolic process	3.67e-05	0	dependent GO term
toll-like receptor 5 signaling pathway	3.7e-05	0.181818	dependent GO term
cytoplasmic transport	3.72e-05	0	dependent GO term
negative regulation of apoptotic process	3.73e-05	0	dependent GO term
programmed cell death	3.76e-05	0.285714	dependent GO term
signal transduction involved in cell cycle checkpoint	3.77e-05	0	dependent GO term
regulation of hemostasis	3.79e-05	0.181818	dependent GO term
regulation of blood coagulation	3.79e-05	0.181818	dependent GO term
cellular macromolecule catabolic process	3.83e-05	0	dependent GO term
regulation of glycoprotein biosynthetic process	3.83e-05	0	dependent GO term
regulation of cell motility	3.85e-05	0	dependent GO term
negative regulation of programmed cell death	3.92e-05	0	dependent GO term
DNA replication	3.95e-05	0.375	dependent GO term
synaptic transmission	4.03e-05	0	dependent GO term
toll-like receptor 3 signaling pathway	4.04e-05	0.333333	dependent GO term
regulation of acute inflammatory response	4.04e-05	0.666667	dependent GO term
regulation of system process	4.09e-05	0	dependent GO term
regulation of cellular component size	4.17e-05	0	dependent GO term
complement activation	4.18e-05	0	dependent GO term
complement activation	4.18e-05	0.666667	dependent GO term
complement activation	4.18e-05	0	dependent GO term
positive regulation of ubiquitin-protein ligase activity involved in mitotic cell cycle	4.18e-05	0	dependent GO term
protein export from nucleus	4.2e-05	0	dependent GO term
activation of innate immune response	4.27e-05	0	dependent GO term
peptide hormone processing	4.27e-05	0	dependent GO term
regulation of phosphatidylinositol 3-kinase activity	4.29e-05	0	dependent GO term
positive regulation vascular endothelial growth factor production	4.3e-05	0.111111	dependent GO term
positive regulation of gene expression	4.31e-05	0	dependent GO term
interspecies interaction between organisms	4.33e-05	0	dependent GO term
symbiosis, encompassing mutualism through parasitism	4.33e-05	0	dependent GO term
regulation of negative chemotaxis	4.4e-05	0.333333	dependent GO term
nucleotide-binding oligomerization domain containing 1 signaling pathway	4.4e-05	0.333333	dependent GO term
telomere maintenance in response to DNA damage	4.4e-05	0.333333	dependent GO term
protection from non-homologous end joining at telomere	4.4e-05	0.333333	dependent GO term
activation of cysteine-type endopeptidase activity involved in apoptotic process	4.47e-05	0	dependent GO term
regulation of protein phosphorylation	4.49e-05	0.181818	dependent GO term
negative regulation of ligase activity	4.61e-05	0.333333	dependent GO term
negative regulation of ubiquitin-protein ligase activity	4.61e-05	0.333333	dependent GO term
adherens junction organization	4.61e-05	0	dependent GO term
tumor necrosis factor production	4.61e-05	0	dependent GO term
regulation of tumor necrosis factor production	4.61e-05	0	dependent GO term
negative regulation of ligase activity	4.61e-05	0	dependent GO term
negative regulation of ubiquitin-protein ligase activity	4.61e-05	0	dependent GO term
cation homeostasis	4.63e-05	0	dependent GO term
anion homeostasis	4.63e-05	0.4	dependent GO term
phospholipid transport	4.63e-05	0.4	dependent GO term
regulation of actin cytoskeleton organization	4.67e-05	0	dependent GO term
G1 DNA damage checkpoint	4.77e-05	0	dependent GO term
mitotic G1 DNA damage checkpoint	4.77e-05	0	dependent GO term
forebrain development	4.8e-05	0	independent GO term
negative regulation of cell death	4.82e-05	0	dependent GO term
regulation of cellular amine metabolic process	4.92e-05	0	dependent GO term
cytoskeleton-dependent intracellular transport	4.92e-05	0	dependent GO term
nucleobase-containing compound catabolic process	4.95e-05	0	dependent GO term
regulation of immune response	5.02e-05	0	dependent GO term
plasma lipoprotein particle organization	5.02e-05	0.4	dependent GO term
regulation of ubiquitin-protein ligase activity involved in mitotic cell cycle	5.08e-05	0.333333	dependent GO term
regulation of ubiquitin-protein ligase activity involved in mitotic cell cycle	5.08e-05	0	dependent GO term
negative regulation of collateral sprouting	5.08e-05	0	dependent GO term
female mating behavior	5.08e-05	0	dependent GO term
regulation of female receptivity	5.08e-05	0	dependent GO term
regulation of behavior	5.09e-05	0	dependent GO term
toll-like receptor TLR1:TLR2 signaling pathway	5.13e-05	0.181818	dependent GO term
toll-like receptor TLR6:TLR2 signaling pathway	5.13e-05	0.181818	dependent GO term
mRNA metabolic process	5.18e-05	0	dependent GO term
activation of cysteine-type endopeptidase activity	5.24e-05	0	dependent GO term
tumor necrosis factor superfamily cytokine production	5.24e-05	0	dependent GO term
calcium ion transport into cytosol	5.24e-05	0	dependent GO term
transcription-coupled nucleotide-excision repair	5.25e-05	0	dependent GO term
ncRNA metabolic process	5.41e-05	0	dependent GO term
cytosolic calcium ion transport	5.41e-05	0	dependent GO term
protein-lipid complex subunit organization	5.43e-05	0.4	dependent GO term
immune effector process	5.43e-05	0	dependent GO term
regulation of coagulation	5.46e-05	0.181818	dependent GO term
regulation of protein complex assembly	5.5e-05	0	dependent GO term
neurotrophin TRK receptor signaling pathway	5.52e-05	0	dependent GO term
positive regulation of the force of heart contraction by epinephrine-norepinephrine	5.56e-05	0	dependent GO term
operant conditioning	5.56e-05	0	dependent GO term
minus-end-directed organelle transport along microtubule	5.56e-05	0.25	dependent GO term
activation of plasma proteins involved in acute inflammatory response	5.56e-05	0.5	dependent GO term
CUT metabolic process	5.56e-05	0	dependent GO term
CUT catabolic process	5.56e-05	0	dependent GO term
MyD88-dependent toll-like receptor signaling pathway	5.58e-05	0.333333	dependent GO term
protein modification by small protein conjugation or removal	5.61e-05	0	dependent GO term
protein modification by small protein conjugation or removal	5.61e-05	0	dependent GO term
neurotrophin signaling pathway	5.63e-05	0	dependent GO term
multicellular organismal process	5.68e-05	0	independent GO term
toll-like receptor 9 signaling pathway	5.68e-05	0.181818	dependent GO term
positive regulation of cell cycle arrest	5.75e-05	0	dependent GO term
response to bacterium	5.77e-05	0	dependent GO term
regulation of membrane potential	5.86e-05	0	dependent GO term
activation of Ras GTPase activity	5.88e-05	0	dependent GO term
regulation of granulocyte chemotaxis	5.88e-05	0	dependent GO term
activation of immune response	5.91e-05	0	dependent GO term
anaphase-promoting complex-dependent proteasomal ubiquitin-dependent protein catabolic process	5.93e-05	0.333333	dependent GO term
anaphase-promoting complex-dependent proteasomal ubiquitin-dependent protein catabolic process	5.93e-05	0	dependent GO term
mitotic DNA damage checkpoint	5.93e-05	0	dependent GO term
pigmentation	5.93e-05	0	independent GO term
regulation of locomotion	5.96e-05	0	dependent GO term
immune response-activating cell surface receptor signaling pathway	5.98e-05	0	dependent GO term
TRIF-dependent toll-like receptor signaling pathway	5.98e-05	0.181818	dependent GO term
immune response-activating signal transduction	6e-05	0	dependent GO term
cellular homeostasis	6.1e-05	0	dependent GO term
glutamate receptor signaling pathway	6.18e-05	0	dependent GO term
positive regulation of GTPase activity	6.18e-05	0	dependent GO term
immunoglobulin production	6.29e-05	0.333333	dependent GO term
mRNA 3'-end processing	6.29e-05	0	dependent GO term
protein activation cascade	6.35e-05	0.111111	dependent GO term
negative regulation of molecular function	6.43e-05	0	dependent GO term
mitotic DNA integrity checkpoint	6.48e-05	0	dependent GO term
positive regulation of ubiquitin-protein ligase activity	6.48e-05	0	dependent GO term
heterocycle catabolic process	6.53e-05	0	dependent GO term
cellular nitrogen compound catabolic process	6.69e-05	0	dependent GO term
aromatic compound catabolic process	6.69e-05	0	dependent GO term
interleukin-7-mediated signaling pathway	6.77e-05	0	dependent GO term
cholesterol efflux	6.78e-05	0.4	dependent GO term
lung saccule development	6.78e-05	0	independent GO term
pore complex assembly	6.78e-05	0	dependent GO term
aggressive behavior	6.78e-05	0	dependent GO term
parental behavior	6.78e-05	0	dependent GO term
maternal behavior	6.78e-05	0	dependent GO term
regulation of cellular macromolecule biosynthetic process	6.89e-05	0.133333	dependent GO term
toll-like receptor 2 signaling pathway	6.93e-05	0.181818	dependent GO term
regulation of cytokine production	6.93e-05	0	dependent GO term
regulation of cellular component movement	6.93e-05	0	dependent GO term
positive regulation of response to stimulus	7.01e-05	0	dependent GO term
interleukin-1-mediated signaling pathway	7.09e-05	0	dependent GO term
regulation of phosphorylation	7.17e-05	0.181818	dependent GO term
positive regulation of ligase activity	7.26e-05	0	dependent GO term
MyD88-independent toll-like receptor signaling pathway	7.27e-05	0.181818	dependent GO term
transmission of nerve impulse	7.33e-05	0	dependent GO term
negative regulation of chemokine-mediated signaling pathway	7.34e-05	0.333333	dependent GO term
mammary duct terminal end bud growth	7.34e-05	0.333333	dependent GO term
telomere capping	7.34e-05	0.333333	dependent GO term
anterior/posterior axon guidance	7.34e-05	0.333333	dependent GO term
plus-end-directed organelle transport along microtubule	7.34e-05	0	dependent GO term
plus-end-directed vesicle transport along microtubule	7.34e-05	0	dependent GO term
dichotomous subdivision of terminal units involved in salivary gland branching	7.34e-05	0	dependent GO term
somatic diversification of T cell receptor genes	7.34e-05	0.333333	dependent GO term
somatic recombination of T cell receptor gene segments	7.34e-05	0.333333	dependent GO term
T cell receptor V(D)J recombination	7.34e-05	0.333333	dependent GO term
positive regulation of cytoplasmic mRNA processing body assembly	7.34e-05	0	dependent GO term
viral process	7.38e-05	0	dependent GO term
regulation of cardiac muscle contraction	7.47e-05	0	dependent GO term
cellular macromolecule biosynthetic process	7.53e-05	0.133333	dependent GO term
positive regulation of immune system process	7.63e-05	0	dependent GO term
cell death	7.83e-05	0.285714	dependent GO term
regulation of vascular endothelial growth factor production	7.85e-05	0.111111	dependent GO term
protein activation cascade	7.89e-05	0	dependent GO term
protein activation cascade	7.89e-05	0.666667	dependent GO term
protein activation cascade	7.89e-05	0	dependent GO term
death	7.91e-05	0.285714	independent GO term
regulation of cell cycle	8.04e-05	0	dependent GO term
negative regulation of G1/S transition of mitotic cell cycle	8.11e-05	0	dependent GO term
organic cyclic compound catabolic process	8.2e-05	0	dependent GO term
positive regulation of response to external stimulus	8.33e-05	0	dependent GO term
regulation of nuclear division	8.33e-05	0.333333	dependent GO term
regulation of mitosis	8.33e-05	0.333333	dependent GO term
response to peptide	8.35e-05	0	dependent GO term
multicellular organismal signaling	8.54e-05	0	dependent GO term
toll-like receptor 4 signaling pathway	8.55e-05	0.333333	dependent GO term
toll-like receptor 4 signaling pathway	8.55e-05	0	dependent GO term
regulation of lipid kinase activity	8.56e-05	0	dependent GO term
nuclear pore organization	8.71e-05	0	dependent GO term
positive regulation of amino acid transport	8.71e-05	0	dependent GO term
stress-activated MAPK cascade	8.73e-05	0.181818	dependent GO term
toll-like receptor 3 signaling pathway	8.75e-05	0.181818	dependent GO term
regulation of cell cycle arrest	8.78e-05	0	dependent GO term
positive regulation of protein modification process	8.8e-05	0	dependent GO term
regulation of actin filament-based process	8.95e-05	0	dependent GO term
vascular endothelial growth factor production	8.96e-05	0.111111	dependent GO term
enzyme linked receptor protein signaling pathway	9.01e-05	0.181818	dependent GO term
regulation of Ras GTPase activity	9.09e-05	0	dependent GO term
cellular metal ion homeostasis	9.15e-05	0	dependent GO term
regulation of type I interferon production	9.25e-05	0	dependent GO term
stress-activated protein kinase signaling cascade	9.26e-05	0.181818	dependent GO term
cytokine-mediated signaling pathway	9.26e-05	0	dependent GO term
blood circulation	9.33e-05	0	dependent GO term
B cell receptor signaling pathway	9.34e-05	0.142857	dependent GO term
negative regulation of leukocyte apoptotic process	9.34e-05	0	dependent GO term
regulation of macromolecule biosynthetic process	9.38e-05	0.133333	dependent GO term
regulation of signal transduction	9.39e-05	0	dependent GO term
circulatory system process	9.43e-05	0	dependent GO term
immune response-regulating signaling pathway	9.47e-05	0	dependent GO term
immune response-regulating signaling pathway	9.47e-05	0.333333	dependent GO term
RNA 3'-end processing	9.49e-05	0	dependent GO term
locomotion	9.68e-05	0	independent GO term
actin filament organization	9.68e-05	0	dependent GO term
response to ionizing radiation	9.74e-05	0.333333	dependent GO term
regulation of T cell activation	9.8e-05	0	dependent GO term
positive regulation of nucleobase-containing compound metabolic process	9.87e-05	0	dependent GO term
humoral immune response mediated by circulating immunoglobulin	9.99e-05	0.666667	dependent GO term
humoral immune response mediated by circulating immunoglobulin	9.99e-05	0	dependent GO term
type I interferon production	9.99e-05	0	dependent GO term
positive regulation of innate immune response	0.0001	0	dependent GO term
toll-like receptor 10 signaling pathway	0.000102	0	dependent GO term
digestive system process	0.000102	0	dependent GO term
regulation of ubiquitin-protein ligase activity	0.000102	0.333333	dependent GO term
regulation of ubiquitin-protein ligase activity	0.000102	0	dependent GO term
vesicle organization	0.000102	0	dependent GO term
macromolecule biosynthetic process	0.000104	0.133333	dependent GO term
cellular response to organonitrogen compound	0.000104	0.25	dependent GO term
cellular response to organonitrogen compound	0.000104	0	dependent GO term
cellular macromolecule catabolic process	0.000105	0	dependent GO term
negative regulation of protein ubiquitination	0.000105	0.333333	dependent GO term
negative regulation of protein ubiquitination	0.000105	0	dependent GO term
toll-like receptor 5 signaling pathway	0.000107	0	dependent GO term
endocrine process	0.000107	0	dependent GO term
positive regulation of macromolecule biosynthetic process	0.000109	0	dependent GO term
penile erection	0.000109	0	dependent GO term
positive regulation of immune system process	0.00011	0	dependent GO term
cerebral cortex tangential migration	0.00011	0.333333	dependent GO term
nucleotide-binding oligomerization domain containing 2 signaling pathway	0.00011	0.333333	dependent GO term
protein localization to chromosome, telomeric region	0.00011	0.333333	dependent GO term
protein localization to extracellular region	0.00011	0.333333	dependent GO term
maintenance of protein location in extracellular region	0.00011	0.333333	dependent GO term
cellular response to type I interferon	0.00011	0	dependent GO term
ISG15-protein conjugation	0.00011	0	dependent GO term
DNA ligation involved in DNA repair	0.00011	0.333333	dependent GO term
positive regulation of the force of heart contraction by chemical signal	0.000111	0	dependent GO term
complement activation, classical pathway	0.000111	0.4	dependent GO term
excretion	0.000111	0	dependent GO term
positive regulation of fibrinolysis	0.000111	0.5	dependent GO term
regulation of defense response	0.000112	0	dependent GO term
cellular response to hormone stimulus	0.000112	0	dependent GO term
positive regulation of cysteine-type endopeptidase activity involved in apoptotic process	0.000113	0	dependent GO term
regulation of ligase activity	0.000113	0.333333	dependent GO term
regulation of ligase activity	0.000113	0	dependent GO term
response to type I interferon	0.000113	0	dependent GO term
follicle-stimulating hormone signaling pathway	0.000114	0	dependent GO term
cytokine production	0.000114	0	dependent GO term
granzyme-mediated apoptotic signaling pathway	0.000114	0	dependent GO term
interspecies interaction between organisms	0.000116	0	dependent GO term
symbiosis, encompassing mutualism through parasitism	0.000116	0	dependent GO term
regulation of striated muscle contraction	0.000116	0	dependent GO term
nuclear-transcribed mRNA catabolic process, deadenylation-dependent decay	0.000116	0	dependent GO term
establishment of vesicle localization	0.000119	0	dependent GO term
negative regulation of cell development	0.000121	0	dependent GO term
cellular cation homeostasis	0.000122	0	dependent GO term
positive regulation of nitrogen compound metabolic process	0.000124	0	dependent GO term
cellular response to lipopolysaccharide	0.000124	0.333333	dependent GO term
cellular response to lipopolysaccharide	0.000124	0	dependent GO term
gene silencing	0.000124	0	dependent GO term
DNA damage response, signal transduction by p53 class mediator	0.000127	0	dependent GO term
cytokinesis	0.000127	0	dependent GO term
immune response	0.000129	0	dependent GO term
secretion by tissue	0.000131	0	dependent GO term
regulation of lymphocyte activation	0.000133	0	dependent GO term
mitotic cell cycle	0.000133	0	dependent GO term
positive regulation of cysteine-type endopeptidase activity	0.000133	0	dependent GO term
regulation of collateral sprouting	0.000133	0	dependent GO term
positive regulation of epithelial cell proliferation	0.000133	0	dependent GO term
MyD88-dependent toll-like receptor signaling pathway	0.000135	0.181818	dependent GO term
toll-like receptor TLR1:TLR2 signaling pathway	0.000136	0	dependent GO term
toll-like receptor TLR6:TLR2 signaling pathway	0.000136	0	dependent GO term
endocrine system development	0.000136	0	dependent GO term
cellular response to nitrogen compound	0.000138	0.25	dependent GO term
cellular response to nitrogen compound	0.000138	0	dependent GO term
inflammatory response	0.000139	0	dependent GO term
cellular response to molecule of bacterial origin	0.000139	0.333333	dependent GO term
cellular response to molecule of bacterial origin	0.000139	0	dependent GO term
double-strand break repair	0.000139	0.333333	dependent GO term
phosphate-containing compound metabolic process	0.00014	0.181818	dependent GO term
positive regulation of actin filament polymerization	0.000144	0	dependent GO term
macromolecule catabolic process	0.000147	0	dependent GO term
toll-like receptor 9 signaling pathway	0.000147	0	dependent GO term
microtubule-based transport	0.000147	0.25	dependent GO term
cytoskeleton organization	0.000149	0	dependent GO term
positive regulation of endopeptidase activity	0.000149	0	dependent GO term
mesenchymal cell development	0.000149	0	dependent GO term
cell activation	0.00015	0	independent GO term
response to external stimulus	0.00015	0	independent GO term
activation of immune response	0.000152	0	dependent GO term
TRIF-dependent toll-like receptor signaling pathway	0.000153	0	dependent GO term
DNA catabolic process	0.000153	0	dependent GO term
metal ion homeostasis	0.000153	0	dependent GO term
positive regulation of mRNA splicing, via spliceosome	0.000154	0	dependent GO term
behavioral response to nicotine	0.000154	0	dependent GO term
behavioral response to nicotine	0.000154	0	dependent GO term
regulation of chemokine-mediated signaling pathway	0.000154	0.333333	dependent GO term
tangential migration from the subventricular zone to the olfactory bulb	0.000154	0.333333	dependent GO term
base conversion or substitution editing	0.000154	0	dependent GO term
mRNA modification	0.000154	0	dependent GO term
response to lipoteichoic acid	0.000154	0.333333	dependent GO term
cellular response to lipoteichoic acid	0.000154	0.333333	dependent GO term
sequestering of extracellular ligand from receptor	0.000154	0.333333	dependent GO term
response to lipoteichoic acid	0.000154	0	dependent GO term
cellular response to lipoteichoic acid	0.000154	0	dependent GO term
positive regulation of toll-like receptor 4 signaling pathway	0.000154	0	dependent GO term
forebrain ventricular zone progenitor cell division	0.000154	0	dependent GO term
neural plate regionalization	0.000154	0	dependent GO term
regulation of cytoplasmic mRNA processing body assembly	0.000154	0	dependent GO term
regulation of cellular biosynthetic process	0.000157	0.133333	dependent GO term
cellular response to growth factor stimulus	0.000158	0.333333	dependent GO term
homophilic cell adhesion	0.000159	0	dependent GO term
regulation of glutamate secretion	0.00016	0	dependent GO term
positive regulation of cellular protein metabolic process	0.000161	0	dependent GO term
lymphocyte migration	0.000161	0	dependent GO term
lymphocyte activation	0.000163	0	dependent GO term
extracellular matrix disassembly	0.000164	0.363636	dependent GO term
phosphorus metabolic process	0.000164	0.181818	independent GO term
regulation of wound healing	0.000165	0.181818	dependent GO term
collagen catabolic process	0.000165	0.25	dependent GO term
positive regulation of peptidase activity	0.000166	0	dependent GO term
regulation of G1/S transition of mitotic cell cycle	0.000166	0	dependent GO term
signal transduction in response to DNA damage	0.000166	0	dependent GO term
organophosphate ester transport	0.000169	0.4	dependent GO term
myeloid leukocyte activation	0.00017	0	dependent GO term
toll-like receptor 2 signaling pathway	0.000171	0	dependent GO term
regulation of biosynthetic process	0.000173	0.133333	dependent GO term
positive regulation of signal transduction	0.000173	0	dependent GO term
response to fatty acid	0.000173	0	dependent GO term
MyD88-independent toll-like receptor signaling pathway	0.000177	0	dependent GO term
neurotrophin TRK receptor signaling pathway	0.00018	0.181818	dependent GO term
production of molecular mediator of immune response	0.000181	0.333333	dependent GO term
regulation of cytokine production	0.000183	0	dependent GO term
cell-matrix adhesion	0.000183	0.285714	dependent GO term
membrane depolarization	0.000183	0	dependent GO term
intrinsic apoptotic signaling pathway in response to DNA damage	0.000183	0.5	dependent GO term
response to molecule of bacterial origin	0.000184	0	dependent GO term
cellular response to biotic stimulus	0.000184	0.333333	dependent GO term
cellular response to biotic stimulus	0.000184	0	dependent GO term
cellular component movement	0.000185	0	independent GO term
positive regulation of heart rate by epinephrine-norepinephrine	0.000185	0	dependent GO term
regulation of systemic arterial blood pressure by carotid sinus baroreceptor feedback	0.000185	0	dependent GO term
double-strand break repair via synthesis-dependent strand annealing	0.000185	0	dependent GO term
DNA recombinase assembly	0.000185	0	dependent GO term
positive regulation of synaptic transmission, cholinergic	0.000185	0	dependent GO term
vacuolar acidification	0.000185	0	dependent GO term
blood coagulation, extrinsic pathway	0.000185	0.25	dependent GO term
diencephalon morphogenesis	0.000185	0	dependent GO term
regulation of gene expression	0.000188	0.133333	dependent GO term
acute inflammatory response	0.000188	0.666667	dependent GO term
protein complex assembly	0.000189	0	dependent GO term
body fluid secretion	0.00019	0	dependent GO term
epidermis development	0.000191	0	independent GO term
protein complex biogenesis	0.000191	0	dependent GO term
dephosphorylation	0.000193	0.181818	dependent GO term
DNA repair	0.000193	0.5	dependent GO term
response to organonitrogen compound	0.000194	0.333333	dependent GO term
interaction with host	0.000195	0	dependent GO term
regulation of toll-like receptor signaling pathway	0.000198	0	dependent GO term
cellular protein localization	0.0002	0	dependent GO term
actin cytoskeleton organization	0.0002	0	dependent GO term
mesenchymal cell differentiation	0.0002	0	dependent GO term
positive regulation of cellular biosynthetic process	0.000202	0	dependent GO term
neuronal signal transduction	0.000203	0	dependent GO term
toll-like receptor 3 signaling pathway	0.000203	0	dependent GO term
cellular macromolecule localization	0.000205	0	dependent GO term
detection of molecule of bacterial origin	0.000205	0.333333	dependent GO term
regulation of glycogen catabolic process	0.000205	0	dependent GO term
cellular response to interferon-alpha	0.000205	0	dependent GO term
establishment of integrated proviral latency	0.000205	0.333333	dependent GO term
protein modification process	0.000209	0.181818	dependent GO term
cellular protein modification process	0.000209	0.181818	dependent GO term
carboxylic acid metabolic process	0.000209	0	dependent GO term
cardiac muscle contraction	0.00021	0	dependent GO term
complement activation	0.00021	0.4	dependent GO term
platelet degranulation	0.00021	0.75	dependent GO term
antigen processing and presentation of exogenous peptide antigen via MHC class I, TAP-dependent	0.000212	0	dependent GO term
cellular response to growth factor stimulus	0.000214	0.181818	dependent GO term
positive regulation of response to stimulus	0.000216	0	dependent GO term
cell activation involved in immune response	0.000216	0	dependent GO term
leukocyte activation involved in immune response	0.000216	0	dependent GO term
ribonucleoprotein complex assembly	0.000216	0	dependent GO term
neuron-neuron synaptic transmission	0.000218	0	dependent GO term
multicellular organismal catabolic process	0.000218	0.25	dependent GO term
immune system process	0.000219	0	independent GO term
Golgi transport vesicle coating	0.00022	0.333333	dependent GO term
COPI-coated vesicle budding	0.00022	0.333333	dependent GO term
COPI coating of Golgi vesicle	0.00022	0.333333	dependent GO term
collateral sprouting	0.00022	0	dependent GO term
multicellular organismal reproductive behavior	0.00022	0	dependent GO term
vesicle localization	0.000221	0	dependent GO term
gene expression	0.000222	0.133333	dependent GO term
protein folding	0.000224	0.5	dependent GO term
cation homeostasis	0.000224	0	dependent GO term
nucleotide-excision repair	0.000225	0	dependent GO term
regulation of plasma lipoprotein particle levels	0.000228	0.4	dependent GO term
cellular ion homeostasis	0.000229	0	dependent GO term
regulation of immune response	0.000229	0	dependent GO term
antigen processing and presentation of exogenous peptide antigen via MHC class I	0.000229	0	dependent GO term
nucleic acid metabolic process	0.000231	0.133333	dependent GO term
regulation of system process	0.000231	0	dependent GO term
positive regulation of biosynthetic process	0.000232	0	dependent GO term
regulation of cytoskeleton organization	0.000232	0	dependent GO term
positive regulation of immune response	0.000233	0	dependent GO term
regulation of calcium ion transport	0.000234	0	dependent GO term
toll-like receptor 4 signaling pathway	0.000238	0.181818	dependent GO term
T cell activation	0.00024	0	dependent GO term
positive regulation of signaling	0.000242	0	dependent GO term
positive regulation of catalytic activity	0.000242	0	dependent GO term
toll-like receptor signaling pathway	0.000243	0.333333	dependent GO term
toll-like receptor signaling pathway	0.000243	0	dependent GO term
positive regulation of cell communication	0.000246	0	dependent GO term
ribonucleoprotein complex subunit organization	0.000247	0	dependent GO term
cytoskeleton-dependent intracellular transport	0.000248	0.25	dependent GO term
response to calcium ion	0.000248	0.75	dependent GO term
regulation of leukocyte activation	0.000249	0	dependent GO term
chemical homeostasis	0.000251	0	dependent GO term
transmembrane receptor protein tyrosine kinase signaling pathway	0.000252	0.333333	dependent GO term
positive regulation of protein ubiquitination	0.000252	0	dependent GO term
Golgi vesicle budding	0.000254	0.333333	dependent GO term
positive regulation of fatty acid biosynthetic process	0.000254	0	dependent GO term
positive regulation of systemic arterial blood pressure	0.000254	0	dependent GO term
response to nitrogen compound	0.000257	0.333333	independent GO term
positive regulation of protein metabolic process	0.000258	0	dependent GO term
innate immune response	0.000258	0	dependent GO term
transcription from RNA polymerase II promoter	0.000261	0	dependent GO term
DNA damage checkpoint	0.000261	0	dependent GO term
positive regulation of protein polymerization	0.000263	0	dependent GO term
positive regulation of RNA splicing	0.000264	0	dependent GO term
macrophage activation involved in immune response	0.000264	0	dependent GO term
olfactory bulb interneuron development	0.000264	0.333333	dependent GO term
transcription from mitochondrial promoter	0.000264	0	dependent GO term
establishment of mitochondrion localization, microtubule-mediated	0.000264	0	dependent GO term
mitochondrion transport along microtubule	0.000264	0	dependent GO term
negative regulation of telomere maintenance	0.000264	0.333333	dependent GO term
translesion synthesis	0.000264	0	dependent GO term
neural plate pattern specification	0.000264	0	dependent GO term
protein localization to chromatin	0.000264	0	dependent GO term
immune response-regulating signaling pathway	0.000265	0	dependent GO term
regulation of secretion	0.000268	0	dependent GO term
regulation of protein modification process	0.000271	0.181818	dependent GO term
mitotic cell cycle checkpoint	0.000271	0.333333	dependent GO term
mitotic cell cycle checkpoint	0.000271	0	dependent GO term
regulation of signaling	0.000272	0	dependent GO term
regulation of blood pressure	0.000276	0.25	dependent GO term
regulation of systemic arterial blood pressure by baroreceptor feedback	0.000278	0	dependent GO term
regulation of anatomical structure size	0.000278	0	dependent GO term
response to indole-3-methanol	0.000278	0.25	dependent GO term
cellular response to indole-3-methanol	0.000278	0.25	dependent GO term
intermediate filament bundle assembly	0.000278	0	dependent GO term
microtubule anchoring at microtubule organizing center	0.000278	0.25	dependent GO term
Fc-epsilon receptor signaling pathway	0.000279	0	dependent GO term
regulation of cell communication	0.000279	0	dependent GO term
MyD88-dependent toll-like receptor signaling pathway	0.000281	0	dependent GO term
cholesterol homeostasis	0.000287	0.4	dependent GO term
regulation of lipid transport	0.000287	0.4	dependent GO term
regulation of ion homeostasis	0.000291	0	dependent GO term
skin development	0.000295	0	dependent GO term
cell cycle phase transition	0.000296	0.5	dependent GO term
DNA integrity checkpoint	0.000296	0	dependent GO term
macromolecule modification	0.000298	0.181818	dependent GO term
sterol homeostasis	0.0003	0.4	dependent GO term
nucleobase-containing compound biosynthetic process	0.000301	0.133333	dependent GO term
regulation of GTPase activity	0.000302	0	dependent GO term
chromosome segregation	0.000302	0	independent GO term
signal transduction by p53 class mediator	0.000307	0	dependent GO term
innate immune response	0.000308	0	dependent GO term
cellular response to oxygen-containing compound	0.000308	0.333333	dependent GO term
mesenchyme development	0.000312	0	independent GO term
peptidyl-glutamic acid modification	0.000315	0.181818	dependent GO term
regulation of GTP catabolic process	0.000317	0	dependent GO term
learning	0.000317	0	dependent GO term
cellular response to cytokine stimulus	0.000318	0	dependent GO term
macromolecule catabolic process	0.000324	0	dependent GO term
vesicle-mediated transport	0.000324	0	dependent GO term
DNA-dependent DNA replication	0.000326	0	dependent GO term
extracellular matrix disassembly	0.000326	0.25	dependent GO term
sterol transport	0.000327	0.4	dependent GO term
cholesterol transport	0.000327	0.4	dependent GO term
formation of translation preinitiation complex	0.000329	0	dependent GO term
ectodermal placode development	0.000329	0.333333	independent GO term
ectodermal placode morphogenesis	0.000329	0.333333	dependent GO term
ectodermal placode formation	0.000329	0.333333	independent GO term
grooming behavior	0.000329	0	dependent GO term
positive regulation of mast cell activation involved in immune response	0.00033	0	dependent GO term
positive regulation of mast cell degranulation	0.00033	0	dependent GO term
establishment of viral latency	0.00033	0.333333	dependent GO term
cytokine production	0.000331	0	dependent GO term
immunoglobulin mediated immune response	0.00034	0.666667	dependent GO term
immunoglobulin mediated immune response	0.00034	0	dependent GO term
microtubule-based movement	0.00034	0	dependent GO term
positive regulation of cell proliferation	0.000341	0.333333	dependent GO term
pattern recognition receptor signaling pathway	0.000351	0.333333	dependent GO term
pattern recognition receptor signaling pathway	0.000351	0	dependent GO term
regulation of cellular ketone metabolic process	0.000351	0	dependent GO term
positive regulation of immune response	0.000353	0	dependent GO term
regulation of cell activation	0.000354	0	dependent GO term
actin filament-based process	0.000358	0	independent GO term
positive regulation of cell migration	0.000359	0	dependent GO term
B cell mediated immunity	0.000363	0.666667	dependent GO term
B cell mediated immunity	0.000363	0	dependent GO term
aromatic compound biosynthetic process	0.000367	0.133333	dependent GO term
oxoacid metabolic process	0.000367	0	dependent GO term
heterocycle biosynthetic process	0.000369	0.133333	dependent GO term
behavior	0.000369	0	independent GO term
insulin receptor signaling pathway	0.000369	0	dependent GO term
proteolysis	0.00037	0	dependent GO term
dorsal/ventral axis specification	0.00037	0.333333	dependent GO term
post-anal tail morphogenesis	0.00037	0.333333	dependent GO term
mating behavior	0.00037	0	dependent GO term
positive regulation of transport	0.000374	0	dependent GO term
negative regulation of mitotic cell cycle phase transition	0.000375	0.333333	dependent GO term
negative regulation of mitotic cell cycle phase transition	0.000375	0	dependent GO term
B cell activation	0.000375	0.333333	dependent GO term
histone deacetylation	0.000376	0.142857	dependent GO term
translation	0.000376	0	dependent GO term
meiotic cytokinesis	0.000379	0	dependent GO term
positive regulation of cell motility	0.000381	0	dependent GO term
innate immune response-activating signal transduction	0.000381	0.333333	dependent GO term
innate immune response-activating signal transduction	0.000381	0	dependent GO term
antigen processing and presentation of peptide antigen via MHC class I	0.000381	0	dependent GO term
cellular chemical homeostasis	0.000382	0	dependent GO term
neutrophil chemotaxis	0.000382	0	dependent GO term
cartilage development	0.000388	0	dependent GO term
regulation of the force of heart contraction by chemical signal	0.000389	0	dependent GO term
positive regulation of blood pressure by epinephrine-norepinephrine	0.000389	0	dependent GO term
G-protein coupled glutamate receptor signaling pathway	0.000389	0.25	dependent GO term
positive regulation of uterine smooth muscle contraction	0.000389	0	dependent GO term
regulation of synaptic transmission, cholinergic	0.000389	0	dependent GO term
positive regulation of action potential	0.000389	0	dependent GO term
leukocyte migration involved in inflammatory response	0.000389	0.25	dependent GO term
protein phosphorylation	0.000391	0.181818	dependent GO term
inactivation of MAPK activity	0.000391	0.181818	dependent GO term
regulation of innate immune response	0.000394	0	dependent GO term
organic acid metabolic process	0.000394	0	dependent GO term
humoral immune response	0.000394	0	dependent GO term
humoral immune response	0.000394	0.666667	dependent GO term
humoral immune response	0.000394	0	dependent GO term
protein activation cascade	0.000397	0.4	dependent GO term
establishment of organelle localization	0.0004	0	dependent GO term
sterol catabolic process	0.000403	0.25	dependent GO term
cholesterol catabolic process	0.000403	0.25	dependent GO term
positive regulation of leukocyte degranulation	0.000403	0	dependent GO term
establishment of mitochondrion localization	0.000403	0	dependent GO term
positive regulation of interferon-alpha production	0.000403	0.333333	dependent GO term
DNA ligation	0.000403	0.333333	dependent GO term
receptor localization to synapse	0.000406	0	dependent GO term
synaptic vesicle clustering	0.000406	0	dependent GO term
N-methyl-D-aspartate receptor clustering	0.000406	0	dependent GO term
mature dendritic cell differentiation	0.000406	0	dependent GO term
transcription initiation from RNA polymerase II promoter	0.000409	0.133333	dependent GO term
cell junction assembly	0.000413	0	dependent GO term
positive regulation of defense response	0.000414	0	dependent GO term
positive regulation of cellular component movement	0.000417	0	dependent GO term
cell-cell junction organization	0.000419	0	dependent GO term
T cell differentiation	0.000419	0.333333	dependent GO term
pattern specification process	0.000423	0	dependent GO term
activation of innate immune response	0.000426	0.333333	dependent GO term
activation of innate immune response	0.000426	0	dependent GO term
toll-like receptor 4 signaling pathway	0.00043	0	dependent GO term
protein processing	0.000433	0.666667	dependent GO term
regulation of transmembrane receptor protein serine/threonine kinase signaling pathway	0.000433	0	dependent GO term
ion homeostasis	0.000437	0	dependent GO term
regulation of apoptotic signaling pathway	0.000447	0.285714	dependent GO term
cellular response to mechanical stimulus	0.000447	0	dependent GO term
cell-cell recognition	0.000447	0	dependent GO term
metal ion transport	0.00045	0	dependent GO term
regulation of cysteine-type endopeptidase activity involved in apoptotic process	0.000453	0	dependent GO term
cellular nitrogen compound biosynthetic process	0.000455	0.133333	dependent GO term
translational initiation	0.00046	0	independent GO term
negative regulation of organelle organization	0.00046	0.333333	dependent GO term
translational initiation	0.00046	0	independent GO term
lung epithelial cell differentiation	0.00046	0	dependent GO term
positive regulation of amine transport	0.00046	0	dependent GO term
regulation of leukocyte apoptotic process	0.00047	0	dependent GO term
cell surface receptor signaling pathway	0.000472	0	dependent GO term
protein polyubiquitination	0.000474	0	dependent GO term
positive regulation of locomotion	0.000475	0	dependent GO term
defense response	0.000476	0	dependent GO term
gonad development	0.000481	0	dependent GO term
cytosolic calcium ion homeostasis	0.000481	0	dependent GO term
proteasomal protein catabolic process	0.000483	0.142857	dependent GO term
positive regulation of mast cell activation	0.000484	0	dependent GO term
regulation of toll-like receptor 4 signaling pathway	0.000484	0	dependent GO term
viral latency	0.000484	0.333333	dependent GO term
response to ionizing radiation	0.00049	0	dependent GO term
cellular protein complex assembly	0.000494	0	dependent GO term
regulation of protein modification process	0.000495	0	dependent GO term
humoral immune response mediated by circulating immunoglobulin	0.000502	0.4	dependent GO term
regulation of T cell receptor signaling pathway	0.000505	0	dependent GO term
lung cell differentiation	0.000508	0	independent GO term
positive regulation of vasoconstriction	0.000508	0	dependent GO term
copulation	0.000508	0	dependent GO term
regulation of purine nucleotide catabolic process	0.00051	0	dependent GO term
RNA biosynthetic process	0.000515	0	dependent GO term
regulation of nucleoside metabolic process	0.000517	0	dependent GO term
regulation of nucleotide catabolic process	0.000517	0	dependent GO term
positive regulation of vascular permeability	0.000519	0	dependent GO term
sequestering of zinc ion	0.000519	0.25	dependent GO term
rRNA catabolic process	0.000519	0	dependent GO term
Fc receptor signaling pathway	0.000522	0	dependent GO term
organic cyclic compound biosynthetic process	0.000532	0.133333	dependent GO term
regulation of cysteine-type endopeptidase activity	0.000533	0	dependent GO term
humoral immune response	0.000539	0.111111	dependent GO term
protein maturation	0.000541	0.666667	dependent GO term
positive regulation of JNK cascade	0.000543	0	dependent GO term
tumor necrosis factor-mediated signaling pathway	0.000545	0	dependent GO term
regulation of multicellular organismal process	0.000547	0	dependent GO term
nervous system development	0.000547	0	dependent GO term
positive regulation of cell cycle process	0.000549	0	dependent GO term
collagen metabolic process	0.000555	0.25	dependent GO term
membrane depolarization	0.000561	0	dependent GO term
cell-cell signaling	0.000566	0	dependent GO term
Sertoli cell proliferation	0.000568	0	dependent GO term
striated muscle contraction	0.000568	0	dependent GO term
positive regulation of cell division	0.00057	0.333333	dependent GO term
neutrophil activation involved in immune response	0.000572	0	dependent GO term
acetyl-CoA biosynthetic process from pyruvate	0.000572	0	dependent GO term
regulation of acetyl-CoA biosynthetic process from pyruvate	0.000572	0	dependent GO term
negative chemotaxis	0.000572	0.333333	dependent GO term
regulation of telomere maintenance	0.000572	0.333333	dependent GO term
angiotensin maturation	0.000572	0.333333	dependent GO term
regulation of RNA biosynthetic process	0.000577	0.133333	dependent GO term
regulation of metal ion transport	0.000581	0	dependent GO term
morphogenesis of a branching epithelium	0.000581	0	dependent GO term
positive regulation of cytokine production	0.000601	0	dependent GO term
cellular response to endogenous stimulus	0.000605	0.333333	dependent GO term
positive regulation of molecular function	0.000609	0	dependent GO term
blood coagulation, fibrin clot formation	0.000612	0	dependent GO term
positive regulation of organic acid transport	0.000612	0	dependent GO term
renal sodium excretion	0.000612	0	dependent GO term
regulation of renal sodium excretion	0.000612	0	dependent GO term
cell adhesion mediated by integrin	0.000613	0.285714	dependent GO term
ribosomal protein import into nucleus	0.000616	0	dependent GO term
membrane hyperpolarization	0.000621	0	dependent GO term
startle response	0.000621	0	dependent GO term
Rho protein signal transduction	0.000622	0	dependent GO term
regulation of blood vessel size	0.000625	0	dependent GO term
establishment or maintenance of cell polarity	0.000625	0	independent GO term
regulation of immune system process	0.000629	0	dependent GO term
regulation of tube size	0.00064	0	dependent GO term
regulation of protein ubiquitination	0.000648	0.333333	dependent GO term
cell junction organization	0.000648	0	dependent GO term
regulation of protein ubiquitination	0.000648	0	dependent GO term
regulation of cell projection assembly	0.000653	0	dependent GO term
cellular homeostasis	0.000657	0	dependent GO term
nuclear-transcribed mRNA catabolic process	0.000657	0	dependent GO term
peptidyl-tyrosine phosphorylation	0.000657	0.333333	dependent GO term
cellular amine metabolic process	0.000657	0	dependent GO term
nuclear-transcribed mRNA catabolic process	0.000657	0	dependent GO term
immune response-activating signal transduction	0.000659	0	dependent GO term
regulation of cellular component biogenesis	0.000665	0	dependent GO term
morphogenesis of a branching structure	0.000666	0	dependent GO term
regulation of systemic arterial blood pressure by norepinephrine-epinephrine	0.000667	0	dependent GO term
complement activation, lectin pathway	0.000667	0.4	dependent GO term
neurofilament cytoskeleton organization	0.000667	0	dependent GO term
uterine smooth muscle contraction	0.000667	0	dependent GO term
regulation of uterine smooth muscle contraction	0.000667	0	dependent GO term
positive regulation of synaptic transmission, GABAergic	0.000667	0	dependent GO term
leukocyte aggregation	0.000667	0.25	dependent GO term
regulation of acyl-CoA biosynthetic process	0.000667	0	dependent GO term
olfactory bulb interneuron differentiation	0.000667	0.333333	dependent GO term
fibrinolysis	0.000668	0.333333	dependent GO term
regulation of muscle contraction	0.00067	0	dependent GO term
respiratory electron transport chain	0.00067	0.2	dependent GO term
multicellular organismal macromolecule metabolic process	0.00067	0.25	dependent GO term
positive regulation of multicellular organismal process	0.000674	0	dependent GO term
peptidyl-tyrosine modification	0.000675	0.333333	dependent GO term
regulation of epithelial cell proliferation	0.000675	0	dependent GO term
interleukin-4-mediated signaling pathway	0.000677	0	dependent GO term
postsynaptic membrane assembly	0.000677	0	dependent GO term
neurotransmitter-gated ion channel clustering	0.000677	0	dependent GO term
postsynaptic density protein 95 clustering	0.000677	0	dependent GO term
regulation of dendritic cell chemotaxis	0.000677	0	dependent GO term
positive regulation of dendritic cell chemotaxis	0.000677	0	dependent GO term
cellular response to insulin stimulus	0.000684	0	dependent GO term
connective tissue development	0.000684	0	independent GO term
protein deacetylation	0.000685	0.142857	dependent GO term
T cell activation	0.000694	0	dependent GO term
regulation of signal transduction	0.000699	0.181818	dependent GO term
response to organonitrogen compound	0.000707	0.25	dependent GO term
response to organonitrogen compound	0.000707	0	dependent GO term
cell cycle process	0.000712	0	independent GO term
taxis	0.000712	0	dependent GO term
chemotaxis	0.000712	0	dependent GO term
positive regulation of innate immune response	0.000712	0.333333	dependent GO term
positive regulation of innate immune response	0.000712	0	dependent GO term
defense response to virus	0.000712	0	dependent GO term
anterior/posterior pattern specification	0.000717	0	dependent GO term
cellular ketone metabolic process	0.000721	0	dependent GO term
regulation of RNA metabolic process	0.000723	0.133333	dependent GO term
regulation of amino acid transport	0.000726	0	dependent GO term
regulation of excretion	0.000726	0	dependent GO term
amine metabolic process	0.000731	0	dependent GO term
regulation of mitotic cell cycle phase transition	0.00074	0.333333	dependent GO term
regulation of mitotic cell cycle phase transition	0.00074	0	dependent GO term
toll-like receptor 10 signaling pathway	0.000745	0	dependent GO term
regulation of protein modification process	0.000747	0	dependent GO term
development of primary sexual characteristics	0.00075	0	dependent GO term
positive regulation of immune system process	0.000759	0	dependent GO term
positive regulation of immune response	0.000767	0	dependent GO term
DNA damage response, signal transduction by p53 class mediator resulting in transcription of p21 class mediator	0.00077	0	dependent GO term
dopamine secretion	0.00077	0	dependent GO term
regulation of dopamine secretion	0.00077	0	dependent GO term
regulation of cofactor metabolic process	0.00077	0	dependent GO term
regulation of coenzyme metabolic process	0.00077	0	dependent GO term
extracellular regulation of signal transduction	0.00077	0.333333	dependent GO term
extracellular negative regulation of signal transduction	0.00077	0.333333	dependent GO term
activation of MAPKKK activity	0.00077	0.666667	dependent GO term
regulation of angiotensin metabolic process	0.00077	0.333333	dependent GO term
regulation of angiotensin levels in blood	0.00077	0.333333	dependent GO term
protein complex subunit organization	0.000773	0	dependent GO term
toll-like receptor 5 signaling pathway	0.000777	0	dependent GO term
intracellular pH reduction	0.000787	0	dependent GO term
prostanoid biosynthetic process	0.000787	0	dependent GO term
prostaglandin biosynthetic process	0.000787	0	dependent GO term
skeletal system development	0.000794	0.2	dependent GO term
immune response	0.000797	0	dependent GO term
protein deacylation	0.000803	0.142857	dependent GO term
cell-substrate adhesion	0.000806	0.285714	dependent GO term
positive regulation of stress-activated MAPK cascade	0.00081	0	dependent GO term
regulation of sequestering of calcium ion	0.00081	0	dependent GO term
negative regulation of sequestering of calcium ion	0.00081	0	dependent GO term
release of sequestered calcium ion into cytosol	0.00081	0	dependent GO term
cellular ion homeostasis	0.000811	0	dependent GO term
regulation of heart contraction	0.000818	0	dependent GO term
digestion	0.000835	0	dependent GO term
response to ethanol	0.000838	0	dependent GO term
regulation of Ras protein signal transduction	0.000839	0	dependent GO term
positive regulation of stress-activated protein kinase signaling cascade	0.000845	0	dependent GO term
establishment of cell polarity	0.000845	0	dependent GO term
cell cycle arrest	0.00085	0	dependent GO term
cell cycle arrest	0.00085	0	dependent GO term
maintenance of location	0.00085	0	dependent GO term
G-protein coupled receptor signaling pathway	0.000854	0	dependent GO term
G-protein coupled receptor signaling pathway	0.000854	0	dependent GO term
mRNA catabolic process	0.000861	0	dependent GO term
mRNA catabolic process	0.000861	0	dependent GO term
positive regulation of gene expression	0.000862	0.181818	dependent GO term
neuromuscular process	0.000874	0	dependent GO term
transmembrane receptor protein tyrosine kinase signaling pathway	0.000874	0	dependent GO term
regulation of phosphate metabolic process	0.000875	0.181818	dependent GO term
regulation of hormone levels	0.000876	0	dependent GO term
granulocyte chemotaxis	0.00088	0	dependent GO term
high-density lipoprotein particle clearance	0.00088	0.25	dependent GO term
positive regulation of nitric-oxide synthase activity	0.00088	0.25	dependent GO term
DNA damage response, signal transduction resulting in transcription	0.00088	0	dependent GO term
acetyl-CoA biosynthetic process	0.00088	0	dependent GO term
cellular response to lithium ion	0.00088	0.333333	dependent GO term
cellular biosynthetic process	0.000884	0.133333	dependent GO term
macromolecular complex assembly	0.000884	0	dependent GO term
response to nitrogen compound	0.000889	0.25	independent GO term
response to nitrogen compound	0.000889	0	independent GO term
response to lipopolysaccharide	0.000904	0.333333	dependent GO term
response to lipopolysaccharide	0.000904	0	dependent GO term
multicellular organismal metabolic process	0.000908	0.25	dependent GO term
lipid homeostasis	0.000911	0.4	dependent GO term
vesicle targeting, to, from or within Golgi	0.000915	0.333333	dependent GO term
pH reduction	0.000915	0	dependent GO term
bone morphogenesis	0.000916	0.333333	dependent GO term
leukocyte apoptotic process	0.000916	0	dependent GO term
sequestering of calcium ion	0.000916	0	dependent GO term
G1/S transition of mitotic cell cycle	0.000926	0	dependent GO term
G1/S transition of mitotic cell cycle	0.000926	0	dependent GO term
RNA splicing, via transesterification reactions with bulged adenosine as nucleophile	0.000926	0	dependent GO term
mRNA splicing, via spliceosome	0.000926	0	dependent GO term
stem cell development	0.000926	0	dependent GO term
nuclear export	0.000927	0	dependent GO term
regulation of phosphorus metabolic process	0.000936	0.181818	dependent GO term
regulation of apoptotic process	0.000938	0	dependent GO term
regulation of apoptotic process	0.000938	0.2	dependent GO term
regulation of response to stimulus	0.000941	0	dependent GO term
vascular process in circulatory system	0.000946	0	dependent GO term
toll-like receptor signaling pathway	0.000951	0.181818	dependent GO term
synaptic transmission	0.000951	0	dependent GO term
positive regulation of Rho GTPase activity	0.000953	0	dependent GO term
protein transport	0.000968	0	dependent GO term
ion transport	0.000972	0	dependent GO term
phosphorylation	0.000973	0.181818	dependent GO term
intracellular transport	0.000976	0	dependent GO term
regulation of programmed cell death	0.000981	0	dependent GO term
regulation of programmed cell death	0.000981	0.2	dependent GO term
RNA splicing, via transesterification reactions	0.000983	0	dependent GO term
positive regulation of fatty acid metabolic process	0.000983	0	dependent GO term
positive regulation of molecular function	0.00099	0	dependent GO term
cation transport	0.000994	0	dependent GO term
cortical actin cytoskeleton organization	0.000997	0	dependent GO term
regulation of mast cell degranulation	0.000997	0	dependent GO term
interferon-alpha production	0.000997	0.333333	dependent GO term
regulation of interferon-alpha production	0.000997	0.333333	dependent GO term
telomere maintenance via telomerase	0.000997	0.333333	dependent GO term
response to interferon-alpha	0.000997	0	dependent GO term
dichotomous subdivision of an epithelial terminal unit	0.000997	0	dependent GO term
RNA metabolic process	0.000999	0.133333	dependent GO term
thelarche	0.00102	0	dependent GO term
mammary gland branching involved in thelarche	0.00102	0	dependent GO term
signal transduction	0.00103	0	dependent GO term
regulation of muscle system process	0.00103	0	dependent GO term
cellular response to oxygen-containing compound	0.00103	0.25	dependent GO term
cellular response to oxygen-containing compound	0.00103	0	dependent GO term
response to molecule of bacterial origin	0.00103	0.333333	dependent GO term
response to molecule of bacterial origin	0.00103	0	dependent GO term
DNA recombination	0.00103	0.333333	dependent GO term
organelle localization	0.00104	0	dependent GO term
response to other organism	0.00105	0	dependent GO term
cellular response to lipid	0.00105	0.333333	dependent GO term
cellular response to lipid	0.00105	0	dependent GO term
response to amphetamine	0.00105	0.333333	dependent GO term
regulation of transcription from RNA polymerase II promoter in response to hypoxia	0.00105	0.333333	dependent GO term
activation of cysteine-type endopeptidase activity involved in apoptotic process by cytochrome c	0.00106	0	dependent GO term
regulation of synaptic plasticity	0.00107	0	dependent GO term
positive regulation of type I interferon production	0.00107	0	dependent GO term
ubiquitin-dependent protein catabolic process	0.00107	0	dependent GO term
regulation of chemokine (C-C motif) ligand 5 production	0.00108	0	dependent GO term
positive regulation of chemokine (C-C motif) ligand 5 production	0.00108	0	dependent GO term
lens development in camera-type eye	0.00108	0.125	independent GO term
cell surface receptor signaling pathway	0.00108	0.142857	dependent GO term
sex differentiation	0.00109	0	dependent GO term
cell cycle checkpoint	0.00109	0.333333	dependent GO term
cell cycle checkpoint	0.00109	0	dependent GO term
intracellular signal transduction	0.0011	0.181818	dependent GO term
neurological system process	0.0011	0	dependent GO term
organic substance biosynthetic process	0.00111	0.133333	dependent GO term
regulation of mast cell activation involved in immune response	0.00112	0	dependent GO term
RNA-dependent DNA replication	0.00112	0.333333	dependent GO term
signal transduction involved in regulation of gene expression	0.00112	0	dependent GO term
vesicle transport along microtubule	0.00112	0	dependent GO term
cytoplasmic mRNA processing body assembly	0.00112	0	dependent GO term
regulation of epidermal growth factor receptor signaling pathway	0.00113	0	dependent GO term
modification-dependent protein catabolic process	0.00113	0	dependent GO term
Notch signaling pathway	0.00113	0	dependent GO term
regulation of inflammatory response	0.00113	0.666667	dependent GO term
regulation of inflammatory response	0.00113	0	dependent GO term
retrograde vesicle-mediated transport, Golgi to ER	0.00113	0.333333	dependent GO term
negative regulation of developmental growth	0.00113	0	dependent GO term
glutamate secretion	0.00113	0	dependent GO term
regulation of cell death	0.00114	0	dependent GO term
regulation of cell death	0.00114	0.2	dependent GO term
regulation of antigen receptor-mediated signaling pathway	0.00115	0	dependent GO term
intracellular receptor signaling pathway	0.00115	0	dependent GO term
lymphocyte differentiation	0.00115	0.333333	dependent GO term
modification-dependent macromolecule catabolic process	0.00116	0	dependent GO term
mRNA metabolic process	0.00116	0	dependent GO term
cellular macromolecular complex assembly	0.00117	0.125	dependent GO term
regulation of immune system process	0.00117	0	dependent GO term
cell surface receptor signaling pathway	0.00118	0	dependent GO term
regulation of ERBB signaling pathway	0.00118	0	dependent GO term
calcium ion transport	0.00118	0	dependent GO term
collagen catabolic process	0.0012	0.166667	dependent GO term
cell migration	0.0012	0	dependent GO term
embryonic eye morphogenesis	0.0012	0.333333	dependent GO term
heterophilic cell-cell adhesion	0.0012	0	dependent GO term
regulation of fatty acid biosynthetic process	0.0012	0	dependent GO term
RNA catabolic process	0.00121	0	dependent GO term
RNA catabolic process	0.00121	0	dependent GO term
toll-like receptor signaling pathway	0.00122	0	dependent GO term
positive regulation of fatty acid oxidation	0.00122	0.25	dependent GO term
cellular chemical homeostasis	0.00122	0	dependent GO term
ubiquitin-dependent protein catabolic process via the multivesicular body sorting pathway	0.00122	0.25	dependent GO term
establishment of protein localization	0.00123	0	dependent GO term
endosomal transport	0.00124	0.25	dependent GO term
regulation of response to stress	0.00125	0	dependent GO term
cortical cytoskeleton organization	0.00125	0	dependent GO term
RNA processing	0.00125	0	dependent GO term
cardiac epithelial to mesenchymal transition	0.00125	0	dependent GO term
mitochondrial RNA metabolic process	0.00125	0	dependent GO term
nucleobase-containing compound biosynthetic process	0.00127	0	dependent GO term
lung epithelium development	0.00128	0	dependent GO term
sodium ion homeostasis	0.00128	0	dependent GO term
prostanoid metabolic process	0.00128	0	dependent GO term
prostaglandin metabolic process	0.00128	0	dependent GO term
epithelial cell proliferation	0.0013	0	dependent GO term
heart process	0.00131	0	dependent GO term
heart contraction	0.00131	0	dependent GO term
JAK-STAT cascade	0.00131	0.2	dependent GO term
DNA damage checkpoint	0.00131	0.5	dependent GO term
mRNA metabolic process	0.00132	0	dependent GO term
reproductive structure development	0.00132	0	dependent GO term
regulation of endopeptidase activity	0.00132	0	dependent GO term
sequestering of metal ion	0.00133	0	dependent GO term
regulation of translation	0.00133	0	dependent GO term
cellular calcium ion homeostasis	0.00133	0	dependent GO term
regulation of translation	0.00133	0	dependent GO term
biosynthetic process	0.00134	0.133333	independent GO term
regulation of neuron apoptotic process	0.00134	0	dependent GO term
reproductive system development	0.00134	0	dependent GO term
divalent metal ion transport	0.00134	0	dependent GO term
cellular response to stress	0.00136	0	dependent GO term
proteolysis involved in cellular protein catabolic process	0.00136	0	dependent GO term
gamma-aminobutyric acid transport	0.00136	0	dependent GO term
gamma-aminobutyric acid secretion	0.00136	0	dependent GO term
response to magnesium ion	0.00136	0.2	dependent GO term
ion homeostasis	0.00136	0	dependent GO term
negative regulation of cell cycle phase transition	0.00136	0.333333	dependent GO term
negative regulation of cell cycle phase transition	0.00136	0	dependent GO term
RNA biosynthetic process	0.00139	0.111111	dependent GO term
regulation of blood pressure	0.00139	0	dependent GO term
positive regulation of mRNA processing	0.00139	0	dependent GO term
high-density lipoprotein particle remodeling	0.00139	0.25	dependent GO term
regulation of blood pressure	0.00139	0	dependent GO term
definitive hemopoiesis	0.00139	0	dependent GO term
substrate-dependent cell migration	0.00139	0.333333	dependent GO term
proteasomal protein catabolic process	0.00139	0.333333	dependent GO term
proteasomal protein catabolic process	0.00139	0	dependent GO term
transcription elongation from RNA polymerase III promoter	0.00139	0	dependent GO term
termination of RNA polymerase III transcription	0.00139	0	dependent GO term
positive regulation of organelle assembly	0.00139	0	dependent GO term
response to biotic stimulus	0.0014	0	independent GO term
divalent inorganic cation transport	0.0014	0	dependent GO term
regulation of the force of heart contraction by chemical signal	0.00142	0	dependent GO term
interleukin-12 secretion	0.00142	0	dependent GO term
lipoprotein metabolic process	0.00142	0.4	dependent GO term
insemination	0.00144	0	dependent GO term
positive regulation of protein processing	0.00144	0.5	dependent GO term
negative regulation of transmission of nerve impulse	0.00144	0	dependent GO term
negative regulation of cellular metabolic process	0.00146	0.142857	dependent GO term
regulation of peptidase activity	0.00146	0	dependent GO term
regulation of response to external stimulus	0.00148	0.2	dependent GO term
learning or memory	0.00149	0	dependent GO term
DNA integrity checkpoint	0.00149	0.5	dependent GO term
cellular macromolecule metabolic process	0.0015	0.133333	dependent GO term
regulation of cellular protein metabolic process	0.0015	0.181818	dependent GO term
positive regulation of protein complex assembly	0.0015	0	dependent GO term
electron transport chain	0.00151	0.2	dependent GO term
chromosome segregation	0.00151	0	independent GO term
interphase	0.00151	0	dependent GO term
interphase	0.00151	0	dependent GO term
calcium ion homeostasis	0.00151	0	dependent GO term
enzyme linked receptor protein signaling pathway	0.00152	0.333333	dependent GO term
negative regulation of hemostasis	0.00153	0.181818	dependent GO term
negative regulation of blood coagulation	0.00153	0.181818	dependent GO term
cellular response to glucagon stimulus	0.00153	0	dependent GO term
regulation of intracellular pH	0.00153	0	dependent GO term
intraspecies interaction between organisms	0.00153	0	dependent GO term
social behavior	0.00153	0	dependent GO term
aromatic compound biosynthetic process	0.00154	0	dependent GO term
transmission of nerve impulse	0.00154	0	dependent GO term
glutamine metabolic process	0.00154	0	dependent GO term
cartilage condensation	0.00154	0	dependent GO term
central nervous system projection neuron axonogenesis	0.00154	0	dependent GO term
muscle contraction	0.00154	0	dependent GO term
heterocycle biosynthetic process	0.00155	0	dependent GO term
pattern recognition receptor signaling pathway	0.00155	0.181818	dependent GO term
positive regulation of cytokine production	0.00155	0	dependent GO term
toll-like receptor signaling pathway	0.00157	0	dependent GO term
toll-like receptor signaling pathway	0.00157	0.181818	dependent GO term
negative regulation of macromolecule metabolic process	0.00157	0.142857	dependent GO term
regulation of immune response	0.00157	0	dependent GO term
regulation of immune response	0.00157	0.333333	dependent GO term
GTP catabolic process	0.00157	0	dependent GO term
multicellular organismal catabolic process	0.00158	0.166667	dependent GO term
cellular protein catabolic process	0.00158	0	dependent GO term
DNA replication	0.00158	0	dependent GO term
DNA replication	0.00158	0	dependent GO term
cellular divalent inorganic cation homeostasis	0.00158	0	dependent GO term
regulation of T cell activation	0.0016	0	dependent GO term
guanosine-containing compound catabolic process	0.0016	0	dependent GO term
positive regulation of blood pressure	0.00161	0	dependent GO term
cellular response to peptide	0.00162	0	dependent GO term
cellular response to peptide hormone stimulus	0.00162	0	dependent GO term
nucleobase-containing compound metabolic process	0.00163	0.133333	dependent GO term
chemical homeostasis	0.00163	0	dependent GO term
regulation of innate immune response	0.00163	0.333333	dependent GO term
regulation of innate immune response	0.00163	0	dependent GO term
activation of immune response	0.00164	0	dependent GO term
cell adhesion	0.00165	0.1	dependent GO term
regulation of neuron death	0.00165	0	dependent GO term
regulation of cell cycle	0.00165	0.5	dependent GO term
regulation of Golgi inheritance	0.00167	0.181818	dependent GO term
biological adhesion	0.00167	0.1	independent GO term
positive regulation of defense response	0.00168	0.333333	dependent GO term
positive regulation of defense response	0.00168	0	dependent GO term
cellular response to epidermal growth factor stimulus	0.00169	0	dependent GO term
plasminogen activation	0.00169	0.25	dependent GO term
regulation of fibrinolysis	0.00169	0.25	dependent GO term
regulation of fibrinolysis	0.00169	0.5	dependent GO term
plasminogen activation	0.00169	0.5	dependent GO term
regulation of leukocyte degranulation	0.00169	0	dependent GO term
synaptic transmission, cholinergic	0.00169	0	dependent GO term
positive regulation of toll-like receptor signaling pathway	0.00169	0	dependent GO term
dorsal/ventral neural tube patterning	0.00169	0	dependent GO term
regulation of systemic arterial blood pressure by circulatory renin-angiotensin	0.00169	0.333333	dependent GO term
positive regulation of Rho protein signal transduction	0.0017	0	dependent GO term
negative regulation of fibrinolysis	0.0017	0.2	dependent GO term
interleukin-6-mediated signaling pathway	0.0017	0.2	dependent GO term
regulation of cellular pH	0.0017	0	dependent GO term
multi-organism process	0.00171	0	independent GO term
immunoglobulin mediated immune response	0.00171	0.4	dependent GO term
microtubule-based movement	0.00171	0.25	dependent GO term
innate immune response-activating signal transduction	0.00173	0.181818	dependent GO term
negative regulation of ion transport	0.00173	0	dependent GO term
regulation of cellular protein metabolic process	0.00173	0	dependent GO term
cholesterol metabolic process	0.00173	0.4	dependent GO term
multicellular organismal signaling	0.00173	0	dependent GO term
pattern recognition receptor signaling pathway	0.00176	0	dependent GO term
innate immune response	0.00177	0	dependent GO term
innate immune response	0.00177	0.333333	dependent GO term
localization of cell	0.00177	0	independent GO term
cell motility	0.00177	0	dependent GO term
cellular response to endogenous stimulus	0.00177	0.25	dependent GO term
cellular response to endogenous stimulus	0.00177	0	dependent GO term
ribonucleoprotein complex biogenesis	0.00177	0	dependent GO term
stem cell differentiation	0.00177	0	independent GO term
regulation of molecular function	0.00178	0	dependent GO term
intracellular protein transport	0.00178	0	dependent GO term
regulation of signaling	0.00179	0.181818	dependent GO term
mitotic nuclear envelope disassembly	0.00179	0	dependent GO term
regulation of transcription from RNA polymerase II promoter in response to stress	0.00179	0.333333	dependent GO term
transmembrane receptor protein serine/threonine kinase signaling pathway	0.0018	0	dependent GO term
divalent inorganic cation homeostasis	0.0018	0	dependent GO term
transmembrane receptor protein serine/threonine kinase signaling pathway	0.0018	0	dependent GO term
GTP metabolic process	0.00181	0	dependent GO term
positive regulation of cytoskeleton organization	0.00182	0	dependent GO term
B cell mediated immunity	0.00182	0.4	dependent GO term
neuron apoptotic process	0.00182	0	dependent GO term
regulation of cell communication	0.00183	0.181818	dependent GO term
peptidyl-tyrosine dephosphorylation	0.00184	0.181818	dependent GO term
response to ketone	0.00186	0	dependent GO term
steroid catabolic process	0.00186	0.25	dependent GO term
regulation of myeloid leukocyte mediated immunity	0.00186	0	dependent GO term
neutrophil activation	0.00186	0	dependent GO term
dopamine transport	0.00186	0	dependent GO term
immune system process	0.00187	0	independent GO term
cellular homeostasis	0.00189	0	dependent GO term
negative regulation of fat cell differentiation	0.00189	0.333333	dependent GO term
negative regulation of hemostasis	0.00189	0.333333	dependent GO term
negative regulation of blood coagulation	0.00189	0.333333	dependent GO term
vesicle targeting	0.00189	0.333333	independent GO term
ossification	0.00189	0	dependent GO term
regulation of RNA biosynthetic process	0.0019	0	dependent GO term
presynaptic membrane assembly	0.0019	0	dependent GO term
cellular nitrogen compound biosynthetic process	0.00191	0	dependent GO term
innate immune response-activating signal transduction	0.00191	0	dependent GO term
calcium ion transport into cytosol	0.00192	0	dependent GO term
macromolecular complex subunit organization	0.00193	0	dependent GO term
positive regulation of systemic arterial blood pressure	0.00194	0	dependent GO term
adult heart development	0.00194	0	dependent GO term
positive regulation of renal sodium excretion	0.00194	0	dependent GO term
viral protein processing	0.00194	0.25	dependent GO term
negative regulation of cell cycle process	0.00194	0.333333	dependent GO term
negative regulation of cell cycle process	0.00194	0	dependent GO term
cognition	0.00195	0	dependent GO term
guanosine-containing compound metabolic process	0.00196	0	dependent GO term
negative regulation of cell differentiation	0.00197	0.4	dependent GO term
cytosolic calcium ion transport	0.00198	0	dependent GO term
humoral immune response	0.00198	0.4	dependent GO term
cellular respiration	0.00198	0.2	dependent GO term
lung alveolus development	0.00199	0	independent GO term
membrane disassembly	0.00199	0	dependent GO term
nuclear envelope disassembly	0.00199	0	dependent GO term
activation of innate immune response	0.002	0.181818	dependent GO term
regulation of protein serine/threonine kinase activity	0.00202	0	dependent GO term
reverse cholesterol transport	0.00202	0.25	dependent GO term
positive regulation of epithelial to mesenchymal transition	0.00202	0	dependent GO term
positive regulation of interferon-beta production	0.00202	0.333333	dependent GO term
B cell receptor signaling pathway	0.00203	0	dependent GO term
regulation of ion transport	0.00203	0	dependent GO term
positive regulation of ERK1 and ERK2 cascade	0.00204	0.333333	dependent GO term
positive regulation of ERK1 and ERK2 cascade	0.00204	0	dependent GO term
cellular component movement	0.00204	0	independent GO term
transmembrane transport	0.00204	0	dependent GO term
protein polymerization	0.00204	0.75	dependent GO term
negative regulation of coagulation	0.00205	0.181818	dependent GO term
regulation of cell cycle phase transition	0.00205	0.333333	dependent GO term
regulation of cell cycle phase transition	0.00205	0	dependent GO term
response to virus	0.00207	0	dependent GO term
phospholipid efflux	0.00208	0.4	dependent GO term
vesicle coating	0.00208	0.333333	dependent GO term
regulation of purine nucleotide metabolic process	0.0021	0	dependent GO term
cell-cell junction organization	0.0021	0	dependent GO term
cell-cell junction organization	0.0021	0	dependent GO term
regulation of response to stimulus	0.00211	0	dependent GO term
positive regulation of response to stimulus	0.00211	0	dependent GO term
positive regulation of immune system process	0.00212	0.4	dependent GO term
activation of innate immune response	0.00214	0	dependent GO term
antigen processing and presentation of exogenous peptide antigen	0.00215	0	dependent GO term
Schwann cell proliferation	0.00216	0.125	dependent GO term
protein processing	0.00217	0.25	dependent GO term
antigen processing and presentation of exogenous antigen	0.00219	0	dependent GO term
negative regulation of neurological system process	0.00219	0	dependent GO term
mating	0.00219	0	dependent GO term
mitochondrion localization	0.0022	0	dependent GO term
RNA biosynthetic process	0.00221	0.133333	dependent GO term
organic cyclic compound biosynthetic process	0.00222	0	dependent GO term
interspecies interaction between organisms	0.00222	0	dependent GO term
symbiosis, encompassing mutualism through parasitism	0.00222	0	dependent GO term
forebrain morphogenesis	0.00222	0	dependent GO term
regulation of nucleotide metabolic process	0.00223	0	dependent GO term
cell cycle phase	0.00223	0	dependent GO term
cell cycle phase	0.00223	0	dependent GO term
negative regulation of cellular metabolic process	0.00224	0	dependent GO term
regulation of homeostatic process	0.00225	0	dependent GO term
muscle system process	0.00227	0	dependent GO term
forebrain anterior/posterior pattern specification	0.00229	0	dependent GO term
negative regulation of coagulation	0.00229	0.333333	dependent GO term
regulation of synaptic transmission	0.00231	0	dependent GO term
regulation of macromolecule metabolic process	0.00233	0.133333	dependent GO term
regulation of cellular component biogenesis	0.00234	0	dependent GO term
epithelial cell differentiation	0.00234	0	independent GO term
heterocycle metabolic process	0.00235	0.133333	independent GO term
extracellular matrix disassembly	0.00236	0.166667	dependent GO term
regulation of cell division	0.00236	0.333333	dependent GO term
positive regulation of protein modification process	0.00237	0	dependent GO term
regulation of RNA metabolic process	0.00238	0	dependent GO term
negative regulation of macromolecule metabolic process	0.00238	0	dependent GO term
protein polyubiquitination	0.00238	0	dependent GO term
regulation of alternative mRNA splicing, via spliceosome	0.00238	0	dependent GO term
neuron death	0.00238	0	dependent GO term
regulation of mast cell activation	0.00238	0	dependent GO term
embryonic hemopoiesis	0.00238	0	dependent GO term
positive regulation of interleukin-1 beta secretion	0.00238	0	dependent GO term
cerebral cortex radially oriented cell migration	0.00238	0	dependent GO term
regulation of gene expression by genetic imprinting	0.00238	0.333333	dependent GO term
response to lithium ion	0.00238	0.333333	dependent GO term
response to X-ray	0.00238	0.333333	dependent GO term
protein folding	0.00239	0.333333	dependent GO term
translational elongation	0.00239	0.166667	dependent GO term
cellular aromatic compound metabolic process	0.00241	0.133333	independent GO term
positive regulation of lipid metabolic process	0.00243	0	dependent GO term
regulation of small GTPase mediated signal transduction	0.00243	0	dependent GO term
adaptive immune response based on somatic recombination of immune receptors built from immunoglobulin superfamily domains	0.00243	0.666667	dependent GO term
adaptive immune response based on somatic recombination of immune receptors built from immunoglobulin superfamily domains	0.00243	0	dependent GO term
presynaptic membrane organization	0.00244	0	dependent GO term
actin crosslink formation	0.00244	0	dependent GO term
negative regulation of metabolic process	0.00248	0.142857	dependent GO term
triglyceride-rich lipoprotein particle remodeling	0.0025	0.4	dependent GO term
very-low-density lipoprotein particle remodeling	0.0025	0.4	dependent GO term
positive regulation of heart rate	0.00252	0	dependent GO term
mitochondrial ATP synthesis coupled proton transport	0.00252	0.2	dependent GO term
cortical actin cytoskeleton organization	0.00252	0	dependent GO term
pattern recognition receptor signaling pathway	0.00256	0.181818	dependent GO term
multi-organism process	0.00256	0	independent GO term
granulocyte activation	0.00257	0	dependent GO term
positive regulation of interleukin-1 secretion	0.00257	0	dependent GO term
cell migration involved in sprouting angiogenesis	0.00257	0.333333	dependent GO term
protein localization to chromosome	0.00257	0.333333	dependent GO term
protein localization to chromosome	0.00257	0	dependent GO term
secretion	0.00258	0	dependent GO term
negative regulation of cell cycle	0.00258	0	dependent GO term
negative regulation of cell cycle	0.00258	0.333333	dependent GO term
negative regulation of cell cycle	0.00258	0	dependent GO term
sterol metabolic process	0.0026	0.4	dependent GO term
amino acid transport	0.0026	0	dependent GO term
post-translational protein modification	0.0026	0.25	dependent GO term
regulation of mitotic cell cycle	0.00261	0.333333	dependent GO term
regulation of mitotic cell cycle	0.00261	0	dependent GO term
nucleobase-containing compound biosynthetic process	0.00262	0.111111	dependent GO term
centrosome organization	0.00262	0.375	dependent GO term
membrane budding	0.00262	0.333333	dependent GO term
regulation of organic acid transport	0.00262	0	dependent GO term
cellular monovalent inorganic cation homeostasis	0.00262	0	dependent GO term
neurological system process	0.00264	0	dependent GO term
cell cycle	0.00264	0.166667	independent GO term
cell cycle	0.00264	0	independent GO term
cellular protein metabolic process	0.00265	0.181818	dependent GO term
intrinsic apoptotic signaling pathway	0.00267	0.5	dependent GO term
regulation of catalytic activity	0.00268	0	dependent GO term
regulation of catalytic activity	0.0027	0.181818	dependent GO term
lymphocyte mediated immunity	0.0027	0.666667	dependent GO term
lymphocyte mediated immunity	0.0027	0	dependent GO term
response to abiotic stimulus	0.00271	0	independent GO term
cytoskeleton organization	0.00271	0	dependent GO term
cytoskeleton organization	0.00271	0	dependent GO term
protein maturation	0.00271	0.25	dependent GO term
response to abiotic stimulus	0.00271	0.5	independent GO term
regulation of Rho GTPase activity	0.00272	0	dependent GO term
antigen processing and presentation of peptide antigen	0.00272	0	dependent GO term
negative regulation of axonogenesis	0.00273	0	dependent GO term
regulation of vasoconstriction	0.00273	0	dependent GO term
immune response-activating signal transduction	0.00275	0.181818	dependent GO term
granulocyte differentiation	0.00277	0	dependent GO term
regulation of interleukin-1 beta secretion	0.00277	0	dependent GO term
apoptotic DNA fragmentation	0.00277	0.333333	dependent GO term
apoptotic DNA fragmentation	0.00277	0	dependent GO term
central nervous system neuron axonogenesis	0.00277	0	dependent GO term
regulation of meiosis	0.00277	0	dependent GO term
regulation of intracellular transport	0.00279	0	dependent GO term
macromolecular complex subunit organization	0.00283	0	dependent GO term
virion assembly	0.00283	0.25	dependent GO term
innate immune response-activating signal transduction	0.00285	0.181818	dependent GO term
extracellular matrix organization	0.00286	0.25	dependent GO term
extracellular matrix organization	0.00286	0	dependent GO term
extracellular matrix organization	0.00286	0	dependent GO term
organic hydroxy compound transport	0.00288	0.4	dependent GO term
extracellular structure organization	0.00288	0.25	dependent GO term
extracellular structure organization	0.00288	0	dependent GO term
extracellular structure organization	0.00288	0	dependent GO term
potassium ion transport	0.00295	0	dependent GO term
high-density lipoprotein particle assembly	0.00295	0.4	dependent GO term
Arp2/3 complex-mediated actin nucleation	0.00295	0	dependent GO term
synaptic transmission	0.00298	0	dependent GO term
positive regulation of monooxygenase activity	0.00298	0.25	dependent GO term
mast cell degranulation	0.00298	0	dependent GO term
negative regulation of cytokine-mediated signaling pathway	0.00298	0.333333	dependent GO term
DNA catabolic process, endonucleolytic	0.00298	0.333333	dependent GO term
DNA catabolic process, endonucleolytic	0.00298	0	dependent GO term
ephrin receptor signaling pathway	0.00298	0	dependent GO term
glycogen catabolic process	0.00298	0	dependent GO term
cell proliferation in forebrain	0.00298	0	dependent GO term
regulation of ATPase activity	0.00298	0	dependent GO term
regulation of systemic arterial blood pressure by renin-angiotensin	0.00298	0.333333	dependent GO term
immune response	0.00299	0	dependent GO term
aromatic compound biosynthetic process	0.003	0.111111	dependent GO term
adaptive immune response	0.003	0.666667	dependent GO term
adaptive immune response	0.003	0	dependent GO term
heterocycle biosynthetic process	0.00301	0.111111	dependent GO term
response to oxygen-containing compound	0.00302	0.333333	independent GO term
cytoplasmic pattern recognition receptor signaling pathway	0.00303	0	dependent GO term
Ras protein signal transduction	0.00303	0	dependent GO term
development of secondary female sexual characteristics	0.00304	0	dependent GO term
protein localization to synapse	0.00304	0	dependent GO term
glomerular basement membrane development	0.00304	0.166667	dependent GO term
regulation of nuclear division	0.00304	0.333333	dependent GO term
regulation of mitosis	0.00304	0.333333	dependent GO term
cranial suture morphogenesis	0.00304	0.333333	dependent GO term
response to nitric oxide	0.00304	0	dependent GO term
positive regulation of immune system process	0.00307	0	dependent GO term
positive regulation of immune system process	0.00307	0.181818	dependent GO term
microtubule organizing center organization	0.00308	0.375	dependent GO term
cell development	0.00308	0.4	independent GO term
activation of MAPKK activity	0.00311	0.181818	dependent GO term
toll-like receptor 4 signaling pathway	0.00312	0	dependent GO term
nuclear division	0.00313	0.333333	dependent GO term
mitosis	0.00313	0.333333	dependent GO term
regulation of immune effector process	0.00313	0.666667	dependent GO term
nuclear division	0.00313	0	dependent GO term
mitosis	0.00313	0	dependent GO term
regulation of transmission of nerve impulse	0.00316	0	dependent GO term
cortical cytoskeleton organization	0.00317	0	dependent GO term
zymogen activation	0.00317	0.25	dependent GO term
zinc ion homeostasis	0.00317	0.25	dependent GO term
cellular zinc ion homeostasis	0.00317	0.25	dependent GO term
zymogen activation	0.00317	0.5	dependent GO term
macromolecular complex remodeling	0.00319	0.25	dependent GO term
protein-lipid complex remodeling	0.00319	0.25	dependent GO term
plasma lipoprotein particle remodeling	0.00319	0.25	dependent GO term
mast cell mediated immunity	0.00319	0	dependent GO term
mast cell activation involved in immune response	0.00319	0	dependent GO term
regulation of interleukin-1 secretion	0.00319	0	dependent GO term
acetyl-CoA metabolic process	0.00319	0	dependent GO term
chemokine-mediated signaling pathway	0.00319	0.333333	dependent GO term
olfactory bulb development	0.00319	0.333333	independent GO term
negative regulation of homeostatic process	0.00319	0.333333	dependent GO term
regulation of glucan biosynthetic process	0.00319	0	dependent GO term
regulation of glycogen biosynthetic process	0.00319	0	dependent GO term
cellular response to interleukin-1	0.00321	0	dependent GO term
immune system process	0.00321	0	independent GO term
regulation of hormone secretion	0.00321	0	dependent GO term
positive regulation of lipid biosynthetic process	0.00321	0	dependent GO term
cell junction organization	0.00325	0	dependent GO term
cell junction organization	0.00325	0	dependent GO term
regulation of sequence-specific DNA binding transcription factor activity	0.00325	0.333333	dependent GO term
regulation of nucleobase-containing compound metabolic process	0.00329	0.133333	dependent GO term
intracellular steroid hormone receptor signaling pathway	0.00329	0	dependent GO term
cell recognition	0.00329	0	independent GO term
nuclear-transcribed mRNA catabolic process	0.00329	0	dependent GO term
activation of innate immune response	0.0033	0.181818	dependent GO term
monovalent inorganic cation transport	0.00332	0	dependent GO term
ribonucleoside triphosphate catabolic process	0.00333	0	dependent GO term
purine ribonucleoside triphosphate catabolic process	0.00333	0	dependent GO term
regulation of type I interferon production	0.00337	0	dependent GO term
neuron projection guidance	0.00338	0.333333	dependent GO term
axon guidance	0.00338	0.333333	dependent GO term
purine nucleoside triphosphate catabolic process	0.00339	0	dependent GO term
metal ion transport	0.0034	0	dependent GO term
alternative mRNA splicing, via spliceosome	0.00341	0	dependent GO term
glutamate secretion	0.00341	0	dependent GO term
interleukin-1 beta secretion	0.00341	0	dependent GO term
olfactory lobe development	0.00341	0.333333	independent GO term
negative regulation of developmental growth	0.00341	0.333333	dependent GO term
glucan catabolic process	0.00341	0	dependent GO term
cellular polysaccharide catabolic process	0.00341	0	dependent GO term
branching involved in salivary gland morphogenesis	0.00341	0	dependent GO term
regulation of ion transmembrane transport	0.00343	0	dependent GO term
regulation of primary metabolic process	0.00343	0.133333	dependent GO term
negative regulation of macrophage derived foam cell differentiation	0.00344	0.4	dependent GO term
regulation of fibrinolysis	0.00344	0.2	dependent GO term
cellular nitrogen compound biosynthetic process	0.00348	0.111111	dependent GO term
RNA splicing	0.00349	0	dependent GO term
negative regulation of metabolic process	0.0035	0	dependent GO term
nucleoside triphosphate catabolic process	0.00351	0	dependent GO term
defense response	0.00351	0.166667	dependent GO term
defense response	0.00351	0	dependent GO term
neurological system process involved in regulation of systemic arterial blood pressure	0.00352	0	dependent GO term
nucleotide-excision repair, DNA gap filling	0.00352	0	dependent GO term
intermediate filament organization	0.00352	0	dependent GO term
response to peptide	0.00352	0	dependent GO term
blood coagulation, intrinsic pathway	0.00352	0.5	dependent GO term
negative regulation of protein modification process	0.00352	0.333333	dependent GO term
negative regulation of protein modification process	0.00352	0	dependent GO term
positive regulation of protein complex assembly	0.00355	0	dependent GO term
positive regulation of innate immune response	0.00357	0	dependent GO term
signaling	0.00358	0	independent GO term
single organism signaling	0.00358	0	dependent GO term
chemokine (C-C motif) ligand 5 production	0.00358	0	dependent GO term
forebrain generation of neurons	0.00359	0.333333	dependent GO term
type I interferon production	0.00364	0	dependent GO term
bone development	0.00364	0.333333	independent GO term
regulation of protein metabolic process	0.00364	0	dependent GO term
regulation of catecholamine secretion	0.00364	0	dependent GO term
positive regulation of interleukin-1 beta production	0.00364	0	dependent GO term
negative regulation of chemotaxis	0.00364	0.333333	dependent GO term
positive regulation of interleukin-12 production	0.00364	0.333333	dependent GO term
regulation of glycogen metabolic process	0.00364	0	dependent GO term
regulation of meiotic cell cycle	0.00364	0	dependent GO term
negative regulation of cellular component organization	0.00365	0.333333	dependent GO term
purine nucleoside catabolic process	0.00366	0	dependent GO term
purine ribonucleoside catabolic process	0.00366	0	dependent GO term
protein catabolic process	0.0037	0	dependent GO term
regulation of organelle organization	0.0037	0	dependent GO term
response to endogenous stimulus	0.00371	0.333333	independent GO term
positive regulation of keratinocyte differentiation	0.00372	0	dependent GO term
membrane assembly	0.00372	0	dependent GO term
positive regulation of excitatory postsynaptic membrane potential	0.00372	0	dependent GO term
regulation of N-methyl-D-aspartate selective glutamate receptor activity	0.00372	0	dependent GO term
enzyme linked receptor protein signaling pathway	0.00372	0	dependent GO term
protein deacetylation	0.00373	0	dependent GO term
nuclear envelope organization	0.00373	0	dependent GO term
regulation of extent of cell growth	0.00373	0	dependent GO term
apoptotic process	0.00374	0	dependent GO term
apoptotic process	0.00374	0.2	dependent GO term
antigen processing and presentation	0.00376	0	dependent GO term
cellular metal ion homeostasis	0.00376	0	dependent GO term
regulation of ion transport	0.00381	0	dependent GO term
positive regulation of leukocyte activation	0.00381	0	dependent GO term
regulation of cytokine production involved in immune response	0.00382	0	dependent GO term
blood circulation	0.00382	0.25	dependent GO term
organic cyclic compound metabolic process	0.00385	0.133333	independent GO term
intracellular signal transduction	0.00385	0	dependent GO term
circulatory system process	0.00385	0.25	dependent GO term
regulation of neurological system process	0.00385	0	dependent GO term
regulation of protein phosphorylation	0.00386	0	dependent GO term
regulation of biological quality	0.00386	0.181818	dependent GO term
fatty acid derivative biosynthetic process	0.00386	0	dependent GO term
icosanoid biosynthetic process	0.00386	0	dependent GO term
negative regulation of response to cytokine stimulus	0.00387	0.333333	dependent GO term
polysaccharide catabolic process	0.00387	0	dependent GO term
organ induction	0.00387	1	dependent GO term
organic cyclic compound biosynthetic process	0.00388	0.111111	dependent GO term
regulation of fatty acid oxidation	0.00389	0.25	dependent GO term
positive regulation of smooth muscle contraction	0.00389	0	dependent GO term
copulation	0.00389	0	dependent GO term
cellular nitrogen compound metabolic process	0.00391	0.133333	dependent GO term
programmed cell death	0.00391	0	dependent GO term
programmed cell death	0.00391	0.2	dependent GO term
positive regulation of innate immune response	0.00394	0.181818	dependent GO term
chemical homeostasis	0.00394	0	dependent GO term
organelle fission	0.00394	0.333333	dependent GO term
organelle fission	0.00394	0	dependent GO term
response to metal ion	0.00395	0.75	dependent GO term
regulation of cellular metabolic process	0.00396	0.133333	dependent GO term
clathrin coat assembly	0.00397	0.2	dependent GO term
positive regulation of activin receptor signaling pathway	0.00397	0	dependent GO term
ribonucleoside catabolic process	0.00398	0	dependent GO term
collagen metabolic process	0.00402	0.166667	dependent GO term
anion transport	0.00405	0.25	dependent GO term
regulation of cellular protein metabolic process	0.00406	0	dependent GO term
negative regulation of protein phosphorylation	0.00408	0.181818	dependent GO term
leukocyte mediated immunity	0.00408	0.666667	dependent GO term
leukocyte mediated immunity	0.00408	0	dependent GO term
regulation of protein metabolic process	0.0041	0.181818	dependent GO term
oligodendrocyte development	0.00411	0	dependent GO term
positive regulation of cell morphogenesis involved in differentiation	0.00411	0	dependent GO term
interleukin-1 secretion	0.00411	0	dependent GO term
organelle transport along microtubule	0.00411	0	dependent GO term
positive regulation of tumor necrosis factor production	0.00411	0.333333	dependent GO term
positive regulation of tumor necrosis factor production	0.00411	0	dependent GO term
regulation of polysaccharide biosynthetic process	0.00411	0	dependent GO term
genetic imprinting	0.00411	0.333333	dependent GO term
organelle transport along microtubule	0.00411	0	dependent GO term
RNA metabolic process	0.00412	0	dependent GO term
cytokine-mediated signaling pathway	0.00412	0	dependent GO term
cellular response to organonitrogen compound	0.00414	0	dependent GO term
protein deacylation	0.00414	0	dependent GO term
regulation of pH	0.00414	0	dependent GO term
cell adhesion	0.00416	0.363636	dependent GO term
regulation of early endosome to late endosome transport	0.00417	0.181818	dependent GO term
cellular response to organic substance	0.00419	0.181818	dependent GO term
biological adhesion	0.00421	0.363636	independent GO term
cytokine biosynthetic process	0.00422	0	dependent GO term
actin cytoskeleton organization	0.00422	0	dependent GO term
purine ribonucleotide catabolic process	0.00422	0	dependent GO term
protein localization	0.00426	0	dependent GO term
ribonucleotide catabolic process	0.00426	0	dependent GO term
platelet activation	0.00426	0.75	dependent GO term
positive regulation of heart contraction	0.00428	0	dependent GO term
energy coupled proton transport, down electrochemical gradient	0.00428	0.2	dependent GO term
ATP synthesis coupled proton transport	0.00428	0.2	dependent GO term
establishment or maintenance of bipolar cell polarity	0.00428	0	dependent GO term
establishment or maintenance of apical/basal cell polarity	0.00428	0	dependent GO term
synaptic transmission, cholinergic	0.00428	0	dependent GO term
response to morphine	0.00428	0	dependent GO term
regulation of amine transport	0.00428	0	dependent GO term
unsaturated fatty acid biosynthetic process	0.00428	0	dependent GO term
mRNA catabolic process	0.00431	0	dependent GO term
pyruvate metabolic process	0.00436	0	dependent GO term
regulation of carbohydrate catabolic process	0.00436	0	dependent GO term
regulation of cellular carbohydrate catabolic process	0.00436	0	dependent GO term
neural tube patterning	0.00436	0	dependent GO term
regulation of cellular macromolecule biosynthetic process	0.00438	0	dependent GO term
cellular response to hormone stimulus	0.00439	0	dependent GO term
nucleoside catabolic process	0.0044	0	dependent GO term
positive regulation of cell activation	0.00442	0	dependent GO term
regulation of nitrogen compound metabolic process	0.00443	0.133333	dependent GO term
negative regulation of developmental process	0.00443	0.4	dependent GO term
regulation of anion transport	0.00443	0	dependent GO term
multi-organism behavior	0.00443	0	dependent GO term
homeostatic process	0.00444	0	dependent GO term
neuron cell-cell adhesion	0.00446	0	dependent GO term
craniofacial suture morphogenesis	0.00446	0.333333	dependent GO term
lens fiber cell development	0.00446	0.333333	dependent GO term
positive regulation of pseudopodium assembly	0.00446	0	dependent GO term
cell aging	0.00448	0.375	independent GO term
cytokine metabolic process	0.00453	0	dependent GO term
establishment or maintenance of cell polarity	0.00453	0	independent GO term
response to lipopolysaccharide	0.00453	0.25	dependent GO term
semaphorin-plexin signaling pathway	0.00454	0	dependent GO term
cellular response to interleukin-6	0.00454	0.2	dependent GO term
regulation of transmembrane transport	0.00455	0	dependent GO term
somitogenesis	0.00458	0.333333	dependent GO term
endoderm development	0.00458	0	independent GO term
positive regulation of epidermal growth factor-activated receptor activity	0.00462	0	dependent GO term
positive regulation of interleukin-1 production	0.00462	0	dependent GO term
peroxisome organization	0.00462	0	dependent GO term
regulation of polysaccharide metabolic process	0.00462	0	dependent GO term
negative regulation of protein binding	0.00462	0	dependent GO term
exonucleolytic nuclear-transcribed mRNA catabolic process involved in deadenylation-dependent decay	0.00462	0	dependent GO term
positive regulation of pathway-restricted SMAD protein phosphorylation	0.00462	0	dependent GO term
sister chromatid cohesion	0.00462	0	dependent GO term
regulation of organelle assembly	0.00462	0	dependent GO term
exonucleolytic nuclear-transcribed mRNA catabolic process involved in deadenylation-dependent decay	0.00462	0	dependent GO term
T cell costimulation	0.00463	0	dependent GO term
G1/S transition of mitotic cell cycle	0.00464	0	dependent GO term
renal sodium excretion	0.00468	0	dependent GO term
regulation of renal sodium excretion	0.00468	0	dependent GO term
response to isoquinoline alkaloid	0.00468	0	dependent GO term
blood coagulation, fibrin clot formation	0.00468	0.25	dependent GO term
blood coagulation, fibrin clot formation	0.00468	0.5	dependent GO term
cellular cation homeostasis	0.00468	0	dependent GO term
leukocyte differentiation	0.00468	0.333333	independent GO term
glycosyl compound catabolic process	0.00469	0	dependent GO term
cell communication	0.0047	0	independent GO term
lymphocyte costimulation	0.00474	0	dependent GO term
DNA metabolic process	0.00476	0.5	dependent GO term
DNA metabolic process	0.00476	0	dependent GO term
positive regulation of cellular protein metabolic process	0.00478	0	dependent GO term
response to radiation	0.00478	0.333333	dependent GO term
negative regulation of RNA metabolic process	0.00483	0.142857	dependent GO term
regulation of neurogenesis	0.00484	0	dependent GO term
multicellular organismal macromolecule metabolic process	0.00485	0.166667	dependent GO term
positive regulation of epithelial cell proliferation	0.00485	0.333333	dependent GO term
stress-activated MAPK cascade	0.00486	0	dependent GO term
catecholamine secretion	0.00488	0	dependent GO term
nucleotide-binding oligomerization domain containing signaling pathway	0.00488	0.333333	dependent GO term
regulation of hemostasis	0.00488	0.333333	dependent GO term
regulation of blood coagulation	0.00488	0.333333	dependent GO term
nuclear-transcribed mRNA catabolic process, exonucleolytic	0.00488	0	dependent GO term
peptide hormone processing	0.00488	0.333333	dependent GO term
nuclear-transcribed mRNA catabolic process, exonucleolytic	0.00488	0	dependent GO term
regulation of excitatory postsynaptic membrane potential	0.00494	0	dependent GO term
skeletal system development	0.00495	0	dependent GO term
skeletal system development	0.00495	0	dependent GO term
transcription from RNA polymerase II promoter	0.00497	0.133333	dependent GO term
positive regulation of transcription from RNA polymerase II promoter	0.00501	0.125	dependent GO term
stress-activated protein kinase signaling cascade	0.00504	0	dependent GO term
vesicle-mediated transport	0.00504	0	dependent GO term
vesicle-mediated transport	0.00504	0.75	dependent GO term
amine transport	0.00504	0	dependent GO term
regulation of ERK1 and ERK2 cascade	0.00507	0.333333	dependent GO term
regulation of ERK1 and ERK2 cascade	0.00507	0	dependent GO term
G-protein coupled receptor signaling pathway	0.00509	0	dependent GO term
regulation of the force of heart contraction	0.00511	0	dependent GO term
regulation of protein insertion into mitochondrial membrane involved in apoptotic signaling pathway	0.00511	0.25	dependent GO term
positive regulation of protein insertion into mitochondrial membrane involved in apoptotic signaling pathway	0.00511	0.25	dependent GO term
regulation of synaptic transmission, GABAergic	0.00511	0	dependent GO term
fibrinolysis	0.00511	0.25	dependent GO term
fibrinolysis	0.00511	0.5	dependent GO term
cellular response to nitrogen compound	0.00512	0	dependent GO term
cellular response to growth factor stimulus	0.00514	0	dependent GO term
positive regulation of cyclin-dependent protein kinase activity	0.00514	0.166667	dependent GO term
regulation of cholesterol efflux	0.00514	0.4	dependent GO term
asymmetric cell division	0.00514	0	dependent GO term
phospholipid transport	0.00515	0.25	dependent GO term
response to molecule of bacterial origin	0.00515	0.25	dependent GO term
response to nicotine	0.00515	0	dependent GO term
response to nicotine	0.00515	0	dependent GO term
thioester biosynthetic process	0.00515	0	dependent GO term
acyl-CoA biosynthetic process	0.00515	0	dependent GO term
cerebral cortex cell migration	0.00515	0.333333	dependent GO term
regulation of interferon-beta production	0.00515	0.333333	dependent GO term
cerebral cortex cell migration	0.00515	0	dependent GO term
negative regulation of BMP signaling pathway	0.00515	0	dependent GO term
organelle organization	0.00517	0.375	dependent GO term
regulation of response to external stimulus	0.00519	0	dependent GO term
morphogenesis of an epithelium	0.00519	0	dependent GO term
response to bacterium	0.00522	0.333333	dependent GO term
response to bacterium	0.00522	0	dependent GO term
regulation of response to external stimulus	0.00523	0.181818	dependent GO term
purine ribonucleoside triphosphate metabolic process	0.00523	0	dependent GO term
Ras protein signal transduction	0.00526	0	dependent GO term
positive regulation of hydrolase activity	0.00527	0	dependent GO term
positive regulation of cell migration	0.00527	0	dependent GO term
hormone secretion	0.00527	0	dependent GO term
development of secondary sexual characteristics	0.00528	0	dependent GO term
positive regulation of epidermal cell differentiation	0.00528	0	dependent GO term
regulation of pseudopodium assembly	0.00528	0	dependent GO term
T cell chemotaxis	0.00528	0	dependent GO term
negative regulation of phosphorylation	0.00531	0.181818	dependent GO term
immune response-activating signal transduction	0.00533	0.333333	dependent GO term
immune response-activating signal transduction	0.00533	0	dependent GO term
double-strand break repair via homologous recombination	0.00535	0	dependent GO term
vasoconstriction	0.00535	0	dependent GO term
transmission of nerve impulse	0.00536	0	dependent GO term
cellular catabolic process	0.00536	0	dependent GO term
positive regulation of macromolecule metabolic process	0.00538	0	dependent GO term
plasma lipoprotein particle organization	0.00543	0.25	dependent GO term
positive regulation of exocytosis	0.00543	0	dependent GO term
negative regulation of DNA binding	0.00543	0.333333	dependent GO term
actin-myosin filament sliding	0.00543	0	dependent GO term
muscle filament sliding	0.00543	0	dependent GO term
actin-myosin filament sliding	0.00543	0	dependent GO term
muscle filament sliding	0.00543	0	dependent GO term
somatic diversification of immunoglobulins involved in immune response	0.00543	0.333333	dependent GO term
somatic recombination of immunoglobulin genes involved in immune response	0.00543	0.333333	dependent GO term
isotype switching	0.00543	0.333333	dependent GO term
gene silencing by miRNA	0.00543	0	dependent GO term
purine nucleoside triphosphate metabolic process	0.00544	0	dependent GO term
positive regulation of protein kinase activity	0.00544	0	dependent GO term
regionalization	0.00546	0	dependent GO term
organonitrogen compound metabolic process	0.00546	0	dependent GO term
system process	0.00546	0	dependent GO term
cell cycle checkpoint	0.00546	0.5	dependent GO term
mitotic cell cycle phase transition	0.00547	0	dependent GO term
mitotic cell cycle phase transition	0.00547	0.333333	dependent GO term
T cell activation	0.00547	0	dependent GO term
mitotic cell cycle phase transition	0.00547	0	dependent GO term
T cell activation	0.00547	0.333333	dependent GO term
ribonucleoside triphosphate metabolic process	0.00548	0	dependent GO term
positive regulation of macromolecule metabolic process	0.00549	0.142857	dependent GO term
recombinational repair	0.00551	0	dependent GO term
positive regulation of cell motility	0.00552	0	dependent GO term
response to wounding	0.00553	0	dependent GO term
cytokine production involved in immune response	0.00554	0	dependent GO term
actin filament capping	0.00555	0	dependent GO term
telomere maintenance via semi-conservative replication	0.00555	0	dependent GO term
telomere maintenance via semi-conservative replication	0.00555	0.5	dependent GO term
protein insertion into mitochondrial membrane involved in apoptotic signaling pathway	0.00555	0.25	dependent GO term
regulation of excretion	0.00555	0	dependent GO term
long-term memory	0.00555	0	dependent GO term
defense response to fungus	0.00555	0.25	dependent GO term
metal ion homeostasis	0.00555	0	dependent GO term
ubiquitin-dependent protein catabolic process	0.00559	0.142857	dependent GO term
proteolysis	0.0056	0.4	dependent GO term
cell-cell adhesion	0.00569	0	dependent GO term
[truncated: 1,926 more rows]

## Sheet: dysplastic
GO terms	Significance p-value	diseae enrichment ratio	GO term type
protein-DNA complex disassembly	3.76e-15	0	dependent GO term
chromatin disassembly	3.76e-15	0	dependent GO term
nucleosome disassembly	3.76e-15	0	dependent GO term
acetyl-CoA biosynthetic process from pyruvate	3.33e-14	0	dependent GO term
regulation of acetyl-CoA biosynthetic process from pyruvate	3.33e-14	0	dependent GO term
regulation of acyl-CoA biosynthetic process	5.18e-14	0	dependent GO term
regulation of cofactor metabolic process	7.77e-14	0	dependent GO term
regulation of coenzyme metabolic process	7.77e-14	0	dependent GO term
acetyl-CoA biosynthetic process	1.13e-13	0	dependent GO term
acetyl-CoA metabolic process	3.69e-12	0	dependent GO term
pyruvate metabolic process	8.4e-12	0	dependent GO term
thioester biosynthetic process	1.3e-11	0	dependent GO term
acyl-CoA biosynthetic process	1.3e-11	0	dependent GO term
spliceosomal snRNP assembly	2.49e-11	0.4	dependent GO term
protein deneddylation	6.72e-11	0.2	dependent GO term
cullin deneddylation	6.72e-11	0.2	dependent GO term
formation of translation preinitiation complex	2.07e-10	0	dependent GO term
nitrobenzene metabolic process	3.56e-10	1	dependent GO term
cellular detoxification of nitrogen compound	3.56e-10	1	dependent GO term
regulation of fatty acid metabolic process	3.89e-10	0	dependent GO term
thioester metabolic process	4.17e-10	0	dependent GO term
acyl-CoA metabolic process	4.17e-10	0	dependent GO term
adherens junction organization	1.34e-09	0	dependent GO term
regulation of actin filament polymerization	2.38e-09	0	dependent GO term
regulation of transcription from RNA polymerase II promoter in response to hypoxia	2.39e-09	0.2	dependent GO term
branching involved in salivary gland morphogenesis	2.74e-09	0	dependent GO term
coenzyme biosynthetic process	3.32e-09	0	dependent GO term
detoxification of nitrogen compound	3.56e-09	1	dependent GO term
regulation of actin polymerization or depolymerization	4.72e-09	0	dependent GO term
regulation of actin filament length	4.93e-09	0	dependent GO term
actin filament polymerization	5.36e-09	0	dependent GO term
T cell receptor signaling pathway	5.74e-09	0	dependent GO term
regulation of protein polymerization	6.07e-09	0	dependent GO term
regulation of transcription from RNA polymerase II promoter in response to stress	7.16e-09	0.2	dependent GO term
blood coagulation, intrinsic pathway	9.24e-09	0.166667	dependent GO term
salivary gland morphogenesis	9.75e-09	0	dependent GO term
homophilic cell adhesion	1.08e-08	0	dependent GO term
DNA excision	1.09e-08	0	dependent GO term
nucleotide-excision repair, DNA damage removal	1.09e-08	0	dependent GO term
cofactor biosynthetic process	1.12e-08	0	dependent GO term
salivary gland development	1.3e-08	0	dependent GO term
actin polymerization or depolymerization	1.58e-08	0	dependent GO term
blood coagulation, fibrin clot formation	1.69e-08	0.166667	dependent GO term
antigen receptor-mediated signaling pathway	1.8e-08	0	dependent GO term
ribonucleoprotein complex assembly	1.81e-08	0.4	dependent GO term
platelet dense granule organization	1.99e-08	0	dependent GO term
nucleosome organization	2.18e-08	0	dependent GO term
lung morphogenesis	2.18e-08	0	dependent GO term
ribonucleoprotein complex subunit organization	2.26e-08	0.4	dependent GO term
exocrine system development	2.75e-08	0	independent GO term
protein neddylation	2.99e-08	0	dependent GO term
complement activation, lectin pathway	2.99e-08	0.666667	dependent GO term
chromatin assembly or disassembly	3.41e-08	0	dependent GO term
positive regulation of release of cytochrome c from mitochondria	3.52e-08	0.142857	dependent GO term
regulation of cellular ketone metabolic process	4.07e-08	0	dependent GO term
xenobiotic catabolic process	4.27e-08	1	dependent GO term
response to nitrosative stress	4.27e-08	1	dependent GO term
protein-DNA complex subunit organization	5.02e-08	0	dependent GO term
protein polymerization	5.2e-08	0	dependent GO term
positive regulation of fibrinolysis	5.25e-08	0.166667	dependent GO term
cell junction assembly	5.34e-08	0	dependent GO term
macromolecular complex disassembly	5.44e-08	0	dependent GO term
cell-cell junction organization	5.48e-08	0	dependent GO term
G-protein coupled glutamate receptor signaling pathway	6.29e-08	0	dependent GO term
leukocyte activation	6.68e-08	0	dependent GO term
coenzyme metabolic process	8.19e-08	0	dependent GO term
regulation of cellular component size	8.39e-08	0	dependent GO term
complement activation, classical pathway	9.48e-08	0.5	dependent GO term
regulation of actin cytoskeleton organization	9.67e-08	0	dependent GO term
cardiac chamber formation	1.02e-07	0	independent GO term
exonucleolytic nuclear-transcribed mRNA catabolic process involved in deadenylation-dependent decay	1.12e-07	0	dependent GO term
fibrinolysis	1.14e-07	0.375	dependent GO term
cell junction organization	1.14e-07	0	dependent GO term
regulation of protein complex assembly	1.19e-07	0	dependent GO term
nuclear-transcribed mRNA catabolic process, exonucleolytic	1.26e-07	0	dependent GO term
regulation of translational initiation	1.31e-07	0	dependent GO term
cellular ketone metabolic process	1.36e-07	0	dependent GO term
regulation of lipid metabolic process	1.45e-07	0	dependent GO term
RNA biosynthetic process	1.65e-07	0	dependent GO term
negative regulation of hemostasis	1.74e-07	0.166667	dependent GO term
negative regulation of blood coagulation	1.74e-07	0.166667	dependent GO term
immune system process	1.87e-07	0	independent GO term
anterograde synaptic vesicle transport	1.99e-07	0	dependent GO term
secretory granule organization	1.99e-07	0	dependent GO term
RNA splicing, via transesterification reactions with bulged adenosine as nucleophile	2.06e-07	0.4	dependent GO term
mRNA splicing, via spliceosome	2.06e-07	0.4	dependent GO term
transcription-coupled nucleotide-excision repair	2.1e-07	0	dependent GO term
regulation of actin filament-based process	2.19e-07	0	independent GO term
regulation of release of cytochrome c from mitochondria	2.23e-07	0.142857	dependent GO term
complement activation	2.23e-07	0.5	dependent GO term
RNA splicing, via transesterification reactions	2.28e-07	0.4	dependent GO term
circadian rhythm	2.33e-07	0	dependent GO term
cofactor metabolic process	2.37e-07	0	dependent GO term
actin filament organization	2.42e-07	0	dependent GO term
negative regulation of coagulation	2.58e-07	0.166667	dependent GO term
cellular response to decreased oxygen levels	2.66e-07	0.2	dependent GO term
cellular response to hypoxia	2.66e-07	0.2	dependent GO term
melanosome organization	2.9e-07	0	dependent GO term
immune response-activating cell surface receptor signaling pathway	2.93e-07	0	dependent GO term
tRNA processing	3.41e-07	0	dependent GO term
pigment granule organization	3.45e-07	0	dependent GO term
cellular response to oxygen levels	3.56e-07	0.2	dependent GO term
nucleic acid metabolic process	3.64e-07	0	dependent GO term
chromatin remodeling	4.09e-07	0	dependent GO term
positive regulation of mitochondrial membrane permeability involved in apoptotic process	4.39e-07	0.142857	dependent GO term
mitochondrial outer membrane permeabilization	4.39e-07	0.142857	dependent GO term
positive regulation of mitochondrial membrane permeability	4.87e-07	0.142857	dependent GO term
organ growth	5.03e-07	0	dependent GO term
otic vesicle formation	5.14e-07	0	independent GO term
histone H2A acetylation	5.14e-07	0	dependent GO term
protein activation cascade	5.22e-07	0.5	dependent GO term
nucleobase-containing compound biosynthetic process	5.36e-07	0	dependent GO term
regulation of mitochondrial membrane permeability involved in apoptotic process	5.38e-07	0.142857	dependent GO term
ribonucleoprotein complex biogenesis	6.07e-07	0.4	dependent GO term
cardioblast differentiation	6.3e-07	0	dependent GO term
Golgi transport vesicle coating	6.54e-07	0.25	dependent GO term
COPI-coated vesicle budding	6.54e-07	0.25	dependent GO term
COPI coating of Golgi vesicle	6.54e-07	0.25	dependent GO term
aromatic compound biosynthetic process	6.9e-07	0	dependent GO term
heterocycle biosynthetic process	6.95e-07	0	dependent GO term
humoral immune response mediated by circulating immunoglobulin	7.15e-07	0.5	dependent GO term
anterograde axon cargo transport	7.2e-07	0	dependent GO term
regulation of cytoskeleton organization	7.23e-07	0	dependent GO term
intracellular estrogen receptor signaling pathway	7.91e-07	0.25	dependent GO term
otic vesicle morphogenesis	8.17e-07	0	dependent GO term
type I interferon biosynthetic process	8.17e-07	0	dependent GO term
Golgi vesicle budding	8.17e-07	0.25	dependent GO term
benzene-containing compound metabolic process	8.18e-07	1	dependent GO term
cell activation	8.42e-07	0	independent GO term
DNA catabolic process	8.85e-07	0	dependent GO term
cellular nitrogen compound biosynthetic process	9.09e-07	0	dependent GO term
regulation of anatomical structure size	9.09e-07	0	independent GO term
monocyte differentiation	9.25e-07	0	dependent GO term
extracellular matrix organization	9.29e-07	0.375	dependent GO term
positive regulation of mitochondrion organization	9.34e-07	0.142857	dependent GO term
extracellular structure organization	9.44e-07	0.375	dependent GO term
negative regulation of hemostasis	9.79e-07	0.375	dependent GO term
negative regulation of blood coagulation	9.79e-07	0.375	dependent GO term
apoptotic signaling pathway	1e-06	0.142857	dependent GO term
lymphocyte activation	1.01e-06	0	dependent GO term
gland morphogenesis	1.08e-06	0	dependent GO term
organic cyclic compound biosynthetic process	1.11e-06	0	dependent GO term
regulation of mitochondrial membrane permeability	1.11e-06	0.142857	dependent GO term
ncRNA metabolic process	1.12e-06	0.4	dependent GO term
fatty acid metabolic process	1.13e-06	0	dependent GO term
protein modification by small protein removal	1.13e-06	0.2	dependent GO term
glutathione derivative metabolic process	1.16e-06	1	dependent GO term
glutathione derivative biosynthetic process	1.16e-06	1	dependent GO term
regulation of hemostasis	1.21e-06	0.166667	independent GO term
regulation of blood coagulation	1.21e-06	0.166667	dependent GO term
release of cytochrome c from mitochondria	1.3e-06	0.142857	dependent GO term
regulation of cardiac muscle cell proliferation	1.3e-06	0	dependent GO term
extracellular matrix organization	1.36e-06	0.166667	dependent GO term
extracellular structure organization	1.38e-06	0.166667	dependent GO term
negative regulation of coagulation	1.45e-06	0.375	dependent GO term
nucleotide-excision repair	1.49e-06	0	dependent GO term
regulation of translational initiation in response to stress	1.57e-06	0.166667	dependent GO term
regulation of sequence-specific DNA binding transcription factor activity	1.69e-06	0	dependent GO term
regulation of coagulation	1.74e-06	0.166667	independent GO term
macrophage differentiation	1.76e-06	0	dependent GO term
regulation of immune response	1.79e-06	0.0909091	dependent GO term
cellular protein complex assembly	1.87e-06	0	dependent GO term
RNA splicing	1.9e-06	0.4	dependent GO term
immune response-regulating cell surface receptor signaling pathway involved in phagocytosis	1.92e-06	0	dependent GO term
Fc-gamma receptor signaling pathway	1.92e-06	0	dependent GO term
Fc-gamma receptor signaling pathway involved in phagocytosis	1.92e-06	0	dependent GO term
ribonucleoprotein complex assembly	2.01e-06	0	dependent GO term
otic vesicle development	2.05e-06	0	dependent GO term
blood coagulation, intrinsic pathway	2.05e-06	0	dependent GO term
regulation of cardiac muscle tissue growth	2.13e-06	0	dependent GO term
nuclear-transcribed mRNA catabolic process, deadenylation-dependent decay	2.18e-06	0	dependent GO term
intrinsic apoptotic signaling pathway	2.19e-06	0.142857	dependent GO term
Fc receptor mediated stimulatory signaling pathway	2.26e-06	0	dependent GO term
toll-like receptor signaling pathway	2.35e-06	0	dependent GO term
complement activation, alternative pathway	2.39e-06	0.5	dependent GO term
tRNA metabolic process	2.41e-06	0	dependent GO term
ribonucleoprotein complex subunit organization	2.41e-06	0	dependent GO term
RNA metabolic process	2.49e-06	0	dependent GO term
peroxisome organization	2.54e-06	0	dependent GO term
cellular response to glucagon stimulus	2.54e-06	0	dependent GO term
regulation of cellular component biogenesis	2.72e-06	0	independent GO term
mitotic spindle assembly checkpoint	2.76e-06	0.333333	dependent GO term
regulation of organ morphogenesis	2.79e-06	0	dependent GO term
regulation of apoptotic signaling pathway	2.83e-06	0.142857	dependent GO term
negative regulation of metaphase/anaphase transition of cell cycle	3e-06	0.333333	dependent GO term
spindle assembly checkpoint	3e-06	0.333333	dependent GO term
negative regulation of mitotic metaphase/anaphase transition	3e-06	0.333333	dependent GO term
lung development	3.14e-06	0	independent GO term
chromosome segregation	3.14e-06	0	independent GO term
blood coagulation, fibrin clot formation	3.18e-06	0	dependent GO term
regulation of heart growth	3.25e-06	0	dependent GO term
cellular pigmentation	3.25e-06	0	dependent GO term
respiratory tube development	3.36e-06	0	dependent GO term
mitotic spindle checkpoint	3.51e-06	0.333333	dependent GO term
DNA replication	3.58e-06	0.166667	dependent GO term
cellular component disassembly	3.63e-06	0	dependent GO term
immunoglobulin mediated immune response	3.68e-06	0.5	dependent GO term
axon cargo transport	3.79e-06	0	dependent GO term
pattern recognition receptor signaling pathway	3.85e-06	0	dependent GO term
B cell mediated immunity	4.02e-06	0.5	dependent GO term
insulin receptor signaling pathway	4.11e-06	0	dependent GO term
nucleobase-containing compound metabolic process	4.3e-06	0	dependent GO term
cell-cell adhesion	4.3e-06	0	dependent GO term
innate immune response-activating signal transduction	4.3e-06	0	dependent GO term
immune response-regulating cell surface receptor signaling pathway	4.32e-06	0	dependent GO term
fibroblast growth factor receptor signaling pathway	4.39e-06	0	dependent GO term
humoral immune response	4.48e-06	0.5	dependent GO term
regulation of cell shape	4.67e-06	0	dependent GO term
regulation of translation in response to stress	4.77e-06	0.166667	dependent GO term
plasminogen activation	4.77e-06	0.166667	dependent GO term
regulation of fibrinolysis	4.77e-06	0.166667	independent GO term
Fc-epsilon receptor signaling pathway	4.78e-06	0	dependent GO term
rhythmic process	4.88e-06	0	independent GO term
cellular macromolecule biosynthetic process	4.9e-06	0	dependent GO term
mitochondrial membrane organization	4.93e-06	0.142857	dependent GO term
immune response-activating signal transduction	4.97e-06	0	dependent GO term
activation of innate immune response	4.98e-06	0	dependent GO term
cardiac muscle cell proliferation	5.05e-06	0	dependent GO term
negative regulation of nuclear division	5.05e-06	0.333333	dependent GO term
negative regulation of mitosis	5.05e-06	0.333333	dependent GO term
regulation of apoptotic process	5.1e-06	0.142857	dependent GO term
transmembrane transport	5.2e-06	0	dependent GO term
T cell activation	5.28e-06	0	dependent GO term
regulation of wound healing	5.3e-06	0.166667	dependent GO term
activation of cysteine-type endopeptidase activity involved in apoptotic process	5.3e-06	0.166667	dependent GO term
respiratory system development	5.3e-06	0	independent GO term
regulation of metaphase/anaphase transition of cell cycle	5.4e-06	0.333333	dependent GO term
regulation of mitotic metaphase/anaphase transition	5.4e-06	0.333333	dependent GO term
regulation of programmed cell death	5.43e-06	0.142857	dependent GO term
translational initiation	5.52e-06	0	dependent GO term
translational initiation	5.52e-06	0	dependent GO term
mRNA processing	5.72e-06	0.4	dependent GO term
actin cytoskeleton organization	5.72e-06	0	dependent GO term
striated muscle cell proliferation	5.77e-06	0	dependent GO term
regulation of cardiac muscle tissue development	5.77e-06	0	dependent GO term
metaphase/anaphase transition of cell cycle	5.77e-06	0.333333	dependent GO term
spindle checkpoint	5.77e-06	0.333333	dependent GO term
metaphase/anaphase transition of mitotic cell cycle	5.77e-06	0.333333	dependent GO term
pathway-restricted SMAD protein phosphorylation	5.77e-06	0	dependent GO term
DNA excision	5.88e-06	0.2	dependent GO term
nucleotide-excision repair, DNA damage removal	5.88e-06	0.2	dependent GO term
vesicle targeting, to, from or within Golgi	5.88e-06	0.25	dependent GO term
positive regulation of NF-kappaB transcription factor activity	6.03e-06	0	dependent GO term
potassium ion transport	6.03e-06	0	dependent GO term
mRNA transport	6.22e-06	0.2	dependent GO term
positive regulation of interferon-gamma production	6.55e-06	0.666667	dependent GO term
hair follicle morphogenesis	6.56e-06	0	dependent GO term
activation of cysteine-type endopeptidase activity	6.57e-06	0.166667	dependent GO term
monocarboxylic acid metabolic process	6.6e-06	0	dependent GO term
regulation of cell death	6.72e-06	0.142857	independent GO term
regulation of hemostasis	6.78e-06	0.375	independent GO term
regulation of blood coagulation	6.78e-06	0.375	dependent GO term
cellular response to fibroblast growth factor stimulus	6.86e-06	0	dependent GO term
heterocycle metabolic process	6.87e-06	0	dependent GO term
glutathione metabolic process	6.97e-06	1	dependent GO term
glutamate receptor signaling pathway	6.97e-06	0	dependent GO term
cellular aromatic compound metabolic process	7.08e-06	0	dependent GO term
macromolecule biosynthetic process	7.1e-06	0	dependent GO term
regulation of response to stimulus	7.22e-06	0.0909091	independent GO term
protein auto-ADP-ribosylation	7.34e-06	0	dependent GO term
endonucleolytic cleavage to generate mature 3'-end of SSU-rRNA from (SSU-rRNA, 5.8S rRNA, LSU-rRNA)	7.34e-06	0	dependent GO term
interleukin-23-mediated signaling pathway	7.34e-06	0.666667	dependent GO term
glutamate decarboxylation to succinate	7.34e-06	0.333333	dependent GO term
morphogenesis of a branching epithelium	7.54e-06	0	dependent GO term
regulation of mitochondrion organization	7.96e-06	0.142857	dependent GO term
inositol lipid-mediated signaling	8.12e-06	0	dependent GO term
phosphatidylinositol-mediated signaling	8.12e-06	0	dependent GO term
protein export from nucleus	8.33e-06	0	dependent GO term
chromatin modification	8.7e-06	0	dependent GO term
cardiac muscle tissue growth	8.82e-06	0	dependent GO term
morphogenesis of a branching structure	9.05e-06	0	dependent GO term
cellular response to insulin stimulus	9.38e-06	0	dependent GO term
regulation of nucleobase-containing compound metabolic process	9.56e-06	0	dependent GO term
regulation of coagulation	9.78e-06	0.375	independent GO term
lung epithelium development	9.79e-06	0	dependent GO term
epidermal growth factor receptor signaling pathway	9.89e-06	0	dependent GO term
positive regulation of innate immune response	9.89e-06	0	dependent GO term
ERBB signaling pathway	1.02e-05	0	dependent GO term
phagosome maturation	1.04e-05	0	dependent GO term
protein homooligomerization	1.06e-05	0	dependent GO term
epidermis morphogenesis	1.07e-05	0	dependent GO term
nucleic acid transport	1.1e-05	0.2	dependent GO term
establishment of RNA localization	1.1e-05	0.2	independent GO term
RNA transport	1.1e-05	0.2	dependent GO term
protein activation cascade	1.13e-05	0.166667	dependent GO term
CD4-positive, alpha-beta T cell differentiation involved in immune response	1.17e-05	0	dependent GO term
T-helper cell differentiation	1.17e-05	0	dependent GO term
actin filament-based process	1.19e-05	0	independent GO term
heart growth	1.22e-05	0	dependent GO term
ncRNA processing	1.25e-05	0	dependent GO term
zymogen activation	1.27e-05	0.166667	dependent GO term
organic cyclic compound metabolic process	1.28e-05	0	dependent GO term
cellular nitrogen compound metabolic process	1.31e-05	0	dependent GO term
response to hypoxia	1.32e-05	0.2	dependent GO term
RNA localization	1.36e-05	0.2	independent GO term
response to decreased oxygen levels	1.36e-05	0.2	dependent GO term
positive regulation of protein oligomerization	1.39e-05	0.142857	dependent GO term
alpha-beta T cell activation involved in immune response	1.39e-05	0	dependent GO term
alpha-beta T cell differentiation involved in immune response	1.39e-05	0	dependent GO term
regulation of nitrogen compound metabolic process	1.41e-05	0	dependent GO term
activation of immune response	1.46e-05	0	dependent GO term
regulation of JNK cascade	1.47e-05	0	dependent GO term
T cell differentiation involved in immune response	1.51e-05	0	dependent GO term
rRNA processing	1.55e-05	0	dependent GO term
Fc receptor signaling pathway	1.6e-05	0	dependent GO term
cardiac septum development	1.63e-05	0	independent GO term
actin-myosin filament sliding	1.64e-05	0	dependent GO term
muscle filament sliding	1.64e-05	0	dependent GO term
apoptotic mitochondrial changes	1.65e-05	0.142857	dependent GO term
response to oxygen levels	1.67e-05	0.2	dependent GO term
gene expression	1.71e-05	0	dependent GO term
vesicle targeting	1.77e-05	0.25	independent GO term
positive regulation of cysteine-type endopeptidase activity involved in apoptotic process	1.83e-05	0.166667	dependent GO term
branch elongation involved in salivary gland morphogenesis	1.85e-05	0	dependent GO term
mesenchymal cell differentiation involved in lung development	1.85e-05	0	dependent GO term
fibroblast growth factor receptor signaling pathway involved in mammary gland specification	1.85e-05	0	dependent GO term
secretion by lung epithelial cell involved in lung growth	1.85e-05	0	dependent GO term
mammary gland bud formation	1.85e-05	0	dependent GO term
interleukin-7-mediated signaling pathway	1.85e-05	0	dependent GO term
phospholipase C-activating G-protein coupled glutamate receptor signaling pathway	1.85e-05	0	dependent GO term
umbilical cord development	1.85e-05	0	independent GO term
umbilical cord morphogenesis	1.85e-05	0	dependent GO term
negative regulation of transcription from RNA polymerase II promoter involved in smooth muscle cell differentiation	1.85e-05	0	dependent GO term
rRNA metabolic process	1.89e-05	0	dependent GO term
lymphocyte differentiation	1.89e-05	0	dependent GO term
cytolysis	1.91e-05	0.5	independent GO term
calcium ion transport	1.94e-05	0.333333	dependent GO term
regulation of organ growth	2.03e-05	0	dependent GO term
toll-like receptor 10 signaling pathway	2.03e-05	0	dependent GO term
diencephalon development	2.03e-05	0	independent GO term
nucleobase-containing compound transport	2.05e-05	0.2	dependent GO term
ventral spinal cord development	2.06e-05	0	independent GO term
vesicle coating	2.06e-05	0.25	dependent GO term
toll-like receptor 5 signaling pathway	2.12e-05	0	dependent GO term
positive regulation of telomere maintenance via telomerase	2.2e-05	0	dependent GO term
mitochondrial protein catabolic process	2.2e-05	0	dependent GO term
rRNA 3'-end processing	2.2e-05	0	dependent GO term
positive regulation of response to food	2.2e-05	0	dependent GO term
positive regulation of appetite	2.2e-05	0	dependent GO term
apoptotic process involved in luteolysis	2.2e-05	0	dependent GO term
spliceosomal snRNP assembly	2.21e-05	0	dependent GO term
excretion	2.21e-05	0	dependent GO term
cellular calcium ion homeostasis	2.28e-05	0.333333	dependent GO term
positive regulation of cysteine-type endopeptidase activity	2.28e-05	0.166667	dependent GO term
regulation of translation	2.28e-05	0	dependent GO term
transcription initiation from RNA polymerase II promoter	2.29e-05	0	dependent GO term
divalent metal ion transport	2.31e-05	0.333333	dependent GO term
establishment of synaptic vesicle localization	2.31e-05	0	dependent GO term
synaptic vesicle transport	2.31e-05	0	dependent GO term
pattern recognition receptor signaling pathway	2.34e-05	0	dependent GO term
regulation of stress-activated MAPK cascade	2.34e-05	0	dependent GO term
regulation of organelle organization	2.35e-05	0	dependent GO term
regulation of immune system process	2.37e-05	0.0909091	independent GO term
specification of organ identity	2.38e-05	0	dependent GO term
regulation of stress-activated protein kinase signaling cascade	2.4e-05	0	dependent GO term
divalent inorganic cation transport	2.44e-05	0.333333	dependent GO term
regulation of RNA biosynthetic process	2.46e-05	0	dependent GO term
regulation of immune system process	2.51e-05	0	independent GO term
skin morphogenesis	2.55e-05	0	dependent GO term
synaptic vesicle localization	2.6e-05	0	dependent GO term
innate immune response-activating signal transduction	2.61e-05	0	dependent GO term
fibrinolysis	2.65e-05	0.166667	dependent GO term
positive regulation of endopeptidase activity	2.65e-05	0.166667	dependent GO term
calcium ion homeostasis	2.69e-05	0.333333	dependent GO term
neurotrophin TRK receptor signaling pathway	2.69e-05	0	dependent GO term
toll-like receptor TLR1:TLR2 signaling pathway	2.71e-05	0	dependent GO term
toll-like receptor TLR6:TLR2 signaling pathway	2.71e-05	0	dependent GO term
regulation of toll-like receptor signaling pathway	2.72e-05	0	dependent GO term
neurotrophin signaling pathway	2.73e-05	0	dependent GO term
activation of adenylate cyclase activity	2.73e-05	0	dependent GO term
muscle contraction	2.77e-05	0	dependent GO term
immune response-regulating signaling pathway	2.81e-05	0	dependent GO term
cellular divalent inorganic cation homeostasis	2.88e-05	0.333333	dependent GO term
CD4-positive, alpha-beta T cell differentiation	2.91e-05	0	dependent GO term
membrane budding	2.91e-05	0.25	dependent GO term
toll-like receptor 9 signaling pathway	2.92e-05	0	dependent GO term
microtubule-based transport	2.92e-05	0	dependent GO term
cellular response to peptide	2.96e-05	0	dependent GO term
cellular response to peptide hormone stimulus	2.96e-05	0	dependent GO term
regulation of wound healing	2.97e-05	0.375	dependent GO term
phagocytosis	2.97e-05	0	dependent GO term
regulation of innate immune response	3e-05	0	dependent GO term
activation of innate immune response	3.03e-05	0	dependent GO term
positive regulation of peptidase activity	3.07e-05	0.166667	dependent GO term
positive regulation of defense response	3.12e-05	0	dependent GO term
dicarboxylic acid metabolic process	3.15e-05	0.333333	dependent GO term
gland development	3.2e-05	0	independent GO term
regulation of RNA metabolic process	3.22e-05	0	dependent GO term
regulation of protein activation cascade	3.3e-05	0.5	dependent GO term
regulation of complement activation	3.3e-05	0.5	dependent GO term
ribonucleoprotein complex biogenesis	3.33e-05	0	dependent GO term
nitrogen compound metabolic process	3.35e-05	0	independent GO term
toll-like receptor 2 signaling pathway	3.39e-05	0	dependent GO term
telomere maintenance	3.39e-05	0	dependent GO term
divalent inorganic cation homeostasis	3.42e-05	0.333333	dependent GO term
regulation of MAP kinase activity	3.45e-05	0.125	dependent GO term
negative regulation of ubiquitin-protein ligase activity involved in mitotic cell cycle	3.51e-05	0.333333	dependent GO term
telomere organization	3.51e-05	0	dependent GO term
G-protein coupled receptor signaling pathway	3.52e-05	0	dependent GO term
histone H4 acetylation	3.52e-05	0	dependent GO term
CD4-positive, alpha-beta T cell activation	3.52e-05	0	dependent GO term
glutamate receptor signaling pathway	3.52e-05	0	dependent GO term
Golgi organization	3.52e-05	0.25	dependent GO term
apoptotic process	3.55e-05	0.142857	dependent GO term
histone modification	3.64e-05	0	dependent GO term
chromatin organization	3.72e-05	0	dependent GO term
cell differentiation in spinal cord	3.74e-05	0	independent GO term
programmed cell death	3.76e-05	0.142857	dependent GO term
JNK cascade	3.78e-05	0	dependent GO term
ion transport	4.04e-05	0	dependent GO term
cardiac muscle cell differentiation	4.04e-05	0	dependent GO term
positive regulation of transmembrane receptor protein serine/threonine kinase signaling pathway	4.04e-05	0	dependent GO term
cytokine-mediated signaling pathway	4.07e-05	0.0909091	dependent GO term
positive regulation of sequence-specific DNA binding transcription factor activity	4.09e-05	0	dependent GO term
regulation of cell activation	4.12e-05	0.0909091	independent GO term
response to virus	4.12e-05	0	dependent GO term
extrinsic apoptotic signaling pathway	4.14e-05	0.166667	dependent GO term
complement activation	4.18e-05	0.666667	dependent GO term
positive regulation of ubiquitin-protein ligase activity involved in mitotic cell cycle	4.18e-05	0.333333	dependent GO term
T cell activation involved in immune response	4.2e-05	0	dependent GO term
covalent chromatin modification	4.23e-05	0	dependent GO term
nucleotide-binding oligomerization domain containing signaling pathway	4.27e-05	0	dependent GO term
positive regulation of adenylate cyclase activity	4.27e-05	0	dependent GO term
central nervous system neuron axonogenesis	4.29e-05	0.166667	dependent GO term
regulation of protein oligomerization	4.4e-05	0.142857	dependent GO term
regulation of Golgi inheritance	4.4e-05	0.5	dependent GO term
positive regulation of telomere maintenance	4.4e-05	0	dependent GO term
His-Purkinje system development	4.4e-05	0	independent GO term
bundle of His development	4.4e-05	0	independent GO term
telomere maintenance in response to DNA damage	4.4e-05	0.333333	dependent GO term
protection from non-homologous end joining at telomere	4.4e-05	0.333333	dependent GO term
RNA phosphodiester bond hydrolysis, endonucleolytic	4.4e-05	0	dependent GO term
cleavage involved in rRNA processing	4.4e-05	0	dependent GO term
endonucleolytic cleavage involved in rRNA processing	4.4e-05	0	dependent GO term
endonucleolytic cleavage of tricistronic rRNA transcript (SSU-rRNA, 5.8S rRNA, LSU-rRNA)	4.4e-05	0	dependent GO term
endonucleolytic cleavage in ITS1 to separate SSU-rRNA from 5.8S rRNA and LSU-rRNA from tricistronic rRNA transcript (SSU-rRNA, 5.8S rRNA, LSU-rRNA)	4.4e-05	0	dependent GO term
regulation of T-helper 17 cell lineage commitment	4.4e-05	0.666667	dependent GO term
positive regulation of T-helper 17 cell lineage commitment	4.4e-05	0.666667	dependent GO term
cobalamin transport	4.4e-05	0	dependent GO term
regulation of mast cell chemotaxis	4.4e-05	0.333333	dependent GO term
positive regulation of mast cell chemotaxis	4.4e-05	0.333333	dependent GO term
hormone-mediated apoptotic signaling pathway	4.4e-05	0.666667	dependent GO term
positive regulation of anoikis	4.4e-05	0	dependent GO term
cellular macromolecular complex assembly	4.56e-05	0.4	dependent GO term
cellular macromolecular complex assembly	4.56e-05	0	dependent GO term
negative regulation of ligase activity	4.61e-05	0.333333	dependent GO term
negative regulation of ubiquitin-protein ligase activity	4.61e-05	0.333333	dependent GO term
muscle system process	4.65e-05	0	dependent GO term
cytoskeleton-dependent intracellular transport	4.92e-05	0	dependent GO term
regulation of immune response	5.02e-05	0	dependent GO term
regulation of protein insertion into mitochondrial membrane involved in apoptotic signaling pathway	5.02e-05	0.142857	dependent GO term
positive regulation of protein insertion into mitochondrial membrane involved in apoptotic signaling pathway	5.02e-05	0.142857	dependent GO term
mitotic nuclear envelope disassembly	5.02e-05	0.2	dependent GO term
membrane fusion	5.08e-05	0	dependent GO term
membrane fusion	5.08e-05	0	dependent GO term
regulation of ubiquitin-protein ligase activity involved in mitotic cell cycle	5.08e-05	0.333333	dependent GO term
adaptive immune response based on somatic recombination of immune receptors built from immunoglobulin superfamily domains	5.11e-05	0.5	dependent GO term
mRNA metabolic process	5.18e-05	0.4	dependent GO term
ncRNA metabolic process	5.41e-05	0	dependent GO term
positive regulation of cyclase activity	5.43e-05	0	dependent GO term
MyD88-dependent toll-like receptor signaling pathway	5.58e-05	0	dependent GO term
alpha-amino acid catabolic process	5.58e-05	0.333333	dependent GO term
RNA processing	5.65e-05	0.4	dependent GO term
protein insertion into mitochondrial membrane involved in apoptotic signaling pathway	5.71e-05	0.142857	dependent GO term
spindle organization	5.75e-05	0.333333	dependent GO term
membrane disassembly	5.85e-05	0.2	dependent GO term
nuclear envelope disassembly	5.85e-05	0.2	dependent GO term
lymphocyte mediated immunity	5.86e-05	0.5	dependent GO term
pigmentation	5.93e-05	0	independent GO term
anaphase-promoting complex-dependent proteasomal ubiquitin-dependent protein catabolic process	5.93e-05	0.333333	dependent GO term
positive regulation of innate immune response	6.01e-05	0	dependent GO term
regulation of interferon-gamma production	6.11e-05	0.666667	dependent GO term
cell activation	6.26e-05	0.0909091	independent GO term
regulation of cAMP biosynthetic process	6.29e-05	0.333333	dependent GO term
positive regulation of lyase activity	6.3e-05	0	dependent GO term
extracellular matrix organization	6.33e-05	0.25	dependent GO term
extracellular structure organization	6.4e-05	0.25	dependent GO term
protein insertion into mitochondrial membrane	6.45e-05	0.142857	dependent GO term
regulation of morphogenesis of a branching structure	6.45e-05	0	dependent GO term
peptide metabolic process	6.48e-05	1	dependent GO term
positive regulation of ubiquitin-protein ligase activity	6.48e-05	0.333333	dependent GO term
regulation of cellular macromolecule biosynthetic process	6.74e-05	0	dependent GO term
adaptive immune response	6.76e-05	0.5	dependent GO term
kinin cascade	6.77e-05	0.166667	dependent GO term
plasma kallikrein-kinin cascade	6.77e-05	0.166667	dependent GO term
Factor XII activation	6.77e-05	0.166667	dependent GO term
regulation of response to stress	6.82e-05	0.0909091	dependent GO term
cardiac chamber morphogenesis	6.86e-05	0	dependent GO term
neurotransmitter secretion	7.06e-05	0	dependent GO term
nuclear division	7.14e-05	0.25	dependent GO term
mitosis	7.14e-05	0.25	dependent GO term
nuclear division	7.14e-05	0	dependent GO term
mitosis	7.14e-05	0	dependent GO term
regulation of apoptotic process	7.26e-05	0.166667	dependent GO term
positive regulation of ligase activity	7.26e-05	0.333333	dependent GO term
compartment pattern specification	7.34e-05	0	dependent GO term
cellular response to laminar fluid shear stress	7.34e-05	0	dependent GO term
immunoglobulin V(D)J recombination	7.34e-05	0	dependent GO term
positive regulation of cardioblast differentiation	7.34e-05	0	dependent GO term
telomere capping	7.34e-05	0.333333	dependent GO term
RNA phosphodiester bond hydrolysis	7.34e-05	0	dependent GO term
regulation of T-helper 17 cell differentiation	7.34e-05	0.666667	dependent GO term
positive regulation of memory T cell differentiation	7.34e-05	0.666667	dependent GO term
blood coagulation, extrinsic pathway	7.34e-05	0	dependent GO term
luteolysis	7.34e-05	0	dependent GO term
in utero embryonic development	7.45e-05	0	dependent GO term
cAMP biosynthetic process	7.47e-05	0.333333	dependent GO term
intracellular steroid hormone receptor signaling pathway	7.58e-05	0.25	dependent GO term
regulation of programmed cell death	7.66e-05	0.166667	dependent GO term
organ growth	7.67e-05	0	dependent GO term
protein oligomerization	7.69e-05	0	dependent GO term
cell death	7.83e-05	0.142857	dependent GO term
positive regulation of cell division	7.83e-05	0	dependent GO term
protein activation cascade	7.89e-05	0.666667	dependent GO term
erythrocyte differentiation	7.89e-05	0	dependent GO term
death	7.91e-05	0.142857	independent GO term
regulation of cAMP metabolic process	8.11e-05	0.333333	dependent GO term
regulation of nuclear division	8.33e-05	0.333333	dependent GO term
regulation of mitosis	8.33e-05	0.333333	dependent GO term
response to peptide	8.35e-05	0	dependent GO term
cellular biosynthetic process	8.49e-05	0	dependent GO term
toll-like receptor 4 signaling pathway	8.55e-05	0	dependent GO term
glucose metabolic process	8.67e-05	0	dependent GO term
regulation of cyclic nucleotide biosynthetic process	8.78e-05	0.333333	dependent GO term
ribosome biogenesis	8.89e-05	0	dependent GO term
organ formation	8.98e-05	0	independent GO term
positive regulation of intrinsic apoptotic signaling pathway	9.06e-05	0.142857	dependent GO term
stress-activated MAPK cascade	9.09e-05	0	dependent GO term
cellular metal ion homeostasis	9.15e-05	0.333333	dependent GO term
regulation of cell death	9.2e-05	0.166667	independent GO term
regulation of macromolecule biosynthetic process	9.37e-05	0	dependent GO term
cardiocyte differentiation	9.49e-05	0	independent GO term
interferon-gamma production	9.49e-05	0.666667	dependent GO term
stress-activated protein kinase signaling cascade	9.53e-05	0	dependent GO term
Fc receptor signaling pathway	9.68e-05	0	dependent GO term
positive regulation of immune response	9.69e-05	0	dependent GO term
organelle fission	9.71e-05	0.25	dependent GO term
organelle fission	9.71e-05	0	dependent GO term
regulation of nucleotide biosynthetic process	9.74e-05	0.333333	dependent GO term
regulation of purine nucleotide biosynthetic process	9.74e-05	0.333333	dependent GO term
erythrocyte homeostasis	9.74e-05	0	dependent GO term
leukocyte mediated immunity	0.000102	0.5	dependent GO term
chromatin remodeling	0.000102	0	dependent GO term
vesicle organization	0.000102	0	dependent GO term
regulation of ubiquitin-protein ligase activity	0.000102	0.333333	dependent GO term
immune response	0.000103	0.0909091	dependent GO term
cellular response to organonitrogen compound	0.000104	0	dependent GO term
regulation of striated muscle tissue development	0.000105	0	dependent GO term
negative regulation of protein ubiquitination	0.000105	0.333333	dependent GO term
alpha-beta T cell differentiation	0.000107	0	dependent GO term
cytoplasmic pattern recognition receptor signaling pathway	0.000108	0	dependent GO term
organic substance biosynthetic process	0.00011	0	dependent GO term
DNA biosynthetic process	0.00011	0.166667	dependent GO term
regulation of early endosome to late endosome transport	0.00011	0.5	dependent GO term
protein localization to chromosome, telomeric region	0.00011	0	dependent GO term
negative regulation of heterotypic cell-cell adhesion	0.00011	0	dependent GO term
DNA ligation involved in DNA repair	0.00011	0	dependent GO term
regulation of muscle organ development	0.00011	0	dependent GO term
cardiac chamber development	0.00011	0	independent GO term
protein localization to chromosome, telomeric region	0.00011	0.333333	dependent GO term
maturation of 5.8S rRNA from tricistronic rRNA transcript (SSU-rRNA, 5.8S rRNA, LSU-rRNA)	0.00011	0	dependent GO term
nucleosome positioning	0.00011	0	dependent GO term
negative regulation of interleukin-6 biosynthetic process	0.00011	0	dependent GO term
forebrain anterior/posterior pattern specification	0.00011	0	dependent GO term
positive regulation of cell fate commitment	0.00011	0.666667	dependent GO term
positive regulation of T-helper 17 type immune response	0.00011	0.666667	dependent GO term
T-helper 17 cell lineage commitment	0.00011	0.666667	dependent GO term
cellular response to type I interferon	0.00011	0	dependent GO term
ISG15-protein conjugation	0.00011	0	dependent GO term
lacrimal gland development	0.000111	0	dependent GO term
mammary gland bud morphogenesis	0.000111	0	dependent GO term
lung growth	0.000111	0	dependent GO term
mammary gland specification	0.000111	0	dependent GO term
mast cell proliferation	0.000111	0	dependent GO term
endocardial cushion to mesenchymal transition	0.000111	0	dependent GO term
endocardial cushion to mesenchymal transition involved in heart valve formation	0.000111	0	dependent GO term
cargo loading into vesicle	0.000111	0.25	dependent GO term
cellular response to hormone stimulus	0.000112	0	dependent GO term
receptor metabolic process	0.000113	0.333333	dependent GO term
regulation of muscle tissue development	0.000113	0	dependent GO term
response to type I interferon	0.000113	0	dependent GO term
regulation of ligase activity	0.000113	0.333333	dependent GO term
nucleotide-excision repair, DNA incision, 3'-to lesion	0.000114	0	dependent GO term
regulation of protein processing	0.000116	0.5	dependent GO term
cellular amino acid catabolic process	0.000116	0.333333	dependent GO term
regulation of cysteine-type endopeptidase activity involved in apoptotic process	0.000117	0.166667	dependent GO term
translational initiation	0.000119	0.166667	dependent GO term
regulation of developmental growth	0.000119	0	dependent GO term
establishment of vesicle localization	0.000119	0	dependent GO term
T cell differentiation	0.000121	0	dependent GO term
cellular cation homeostasis	0.000122	0.333333	dependent GO term
leukocyte differentiation	0.000122	0	independent GO term
BMP signaling pathway	0.000124	0	dependent GO term
cyclic purine nucleotide metabolic process	0.000127	0.333333	dependent GO term
immune response	0.000129	0	dependent GO term
regulation of cyclic nucleotide metabolic process	0.00013	0.333333	dependent GO term
defense response	0.000133	0.0909091	dependent GO term
muscle cell proliferation	0.000133	0	dependent GO term
respiratory electron transport chain	0.000133	0	dependent GO term
immune response-regulating cell surface receptor signaling pathway	0.000134	0	dependent GO term
actin-mediated cell contraction	0.000136	0	dependent GO term
cyclic nucleotide biosynthetic process	0.000136	0.333333	dependent GO term
cAMP metabolic process	0.000136	0.333333	dependent GO term
biosynthetic process	0.000137	0	independent GO term
cellular response to nitrogen compound	0.000138	0	dependent GO term
regulation of endocytosis	0.000139	0	dependent GO term
double-strand break repair	0.000139	0.333333	dependent GO term
double-strand break repair	0.000139	0	dependent GO term
cellular response to cytokine stimulus	0.00014	0.0909091	dependent GO term
regulation of cytokine-mediated signaling pathway	0.00014	0.0909091	dependent GO term
morphogenesis of an epithelium	0.00014	0	dependent GO term
regulation of translational initiation	0.000142	0	dependent GO term
nucleotide-binding domain, leucine rich repeat containing receptor signaling pathway	0.000144	0	dependent GO term
positive regulation of actin filament polymerization	0.000144	0	dependent GO term
regulation of cysteine-type endopeptidase activity	0.000145	0.166667	dependent GO term
immune response-activating signal transduction	0.000146	0	dependent GO term
positive regulation of type I interferon production	0.000147	0	dependent GO term
mitochondrial transport	0.000148	0.142857	dependent GO term
cytoskeleton organization	0.000149	0	dependent GO term
myeloid cell homeostasis	0.000149	0	dependent GO term
nuclear envelope organization	0.000152	0.2	dependent GO term
metal ion homeostasis	0.000153	0.333333	dependent GO term
DNA catabolic process	0.000153	0.2	dependent GO term
hexose metabolic process	0.000154	0	dependent GO term
organelle inheritance	0.000154	0.5	dependent GO term
Golgi inheritance	0.000154	0.5	dependent GO term
regulation of telomere maintenance via telomerase	0.000154	0	dependent GO term
negative regulation of protein activation cascade	0.000154	0.666667	dependent GO term
negative regulation of complement activation	0.000154	0.666667	dependent GO term
potassium ion import	0.000154	0	dependent GO term
regulation of T-helper 17 type immune response	0.000154	0.666667	dependent GO term
memory T cell differentiation	0.000154	0.666667	dependent GO term
regulation of memory T cell differentiation	0.000154	0.666667	dependent GO term
glutamate catabolic process	0.000154	0.333333	dependent GO term
disruption by host of symbiont cells	0.000154	0	dependent GO term
killing by host of symbiont cells	0.000154	0	dependent GO term
regulation of humoral immune response	0.000159	0.5	dependent GO term
homophilic cell adhesion	0.000159	0	dependent GO term
ubiquitin-dependent protein catabolic process via the multivesicular body sorting pathway	0.00016	0.333333	dependent GO term
inactivation of MAPK activity	0.000162	0.125	dependent GO term
regulation of cellular biosynthetic process	0.000163	0	dependent GO term
neurotransmitter transport	0.000163	0	dependent GO term
digestion	0.000166	0	independent GO term
positive regulation of signal transduction	0.000169	0	dependent GO term
immune response-activating cell surface receptor signaling pathway	0.000172	0	dependent GO term
chromosome organization	0.000175	0	dependent GO term
post-Golgi vesicle-mediated transport	0.000177	0	dependent GO term
spinal cord development	0.000177	0	independent GO term
posttranscriptional regulation of gene expression	0.000179	0	dependent GO term
regulation of biosynthetic process	0.00018	0	dependent GO term
regulation of response to stress	0.000181	0	dependent GO term
response to toxic substance	0.000181	1	dependent GO term
regulation of neurotransmitter levels	0.000181	0	independent GO term
regulation of innate immune response	0.000182	0	dependent GO term
regulation of macromolecule metabolic process	0.000184	0	dependent GO term
regulation of response to cytokine stimulus	0.000184	0.0909091	dependent GO term
nuclear export	0.000184	0	dependent GO term
positive regulation of keratinocyte proliferation	0.000185	0	dependent GO term
regulation of branching involved in salivary gland morphogenesis by mesenchymal-epithelial signaling	0.000185	0	dependent GO term
positive regulation of epithelial cell proliferation involved in lung morphogenesis	0.000185	0	dependent GO term
regulation of keratinocyte migration	0.000185	0	dependent GO term
positive regulation of keratinocyte migration	0.000185	0	dependent GO term
arterial endothelial cell differentiation	0.000185	0	dependent GO term
dorsal aorta morphogenesis	0.000185	0	dependent GO term
modification-dependent protein catabolic process	0.000187	0.25	dependent GO term
acute inflammatory response	0.000188	0.666667	dependent GO term
positive regulation of defense response	0.000189	0	dependent GO term
protein complex assembly	0.000189	0	dependent GO term
cellular lipid metabolic process	0.00019	0	dependent GO term
embryonic placenta development	0.00019	0	dependent GO term
protein complex biogenesis	0.000191	0	dependent GO term
nuclear-transcribed mRNA catabolic process	0.000192	0	dependent GO term
modification-dependent macromolecule catabolic process	0.000193	0.25	dependent GO term
regulation of gene expression	0.000197	0	dependent GO term
integrin-mediated signaling pathway	0.000197	0.25	dependent GO term
macromolecular complex subunit organization	0.000199	0	dependent GO term
CUT metabolic process	0.000203	0	dependent GO term
CUT catabolic process	0.000203	0	dependent GO term
neuronal signal transduction	0.000203	0	dependent GO term
activation of plasma proteins involved in acute inflammatory response	0.000203	0.166667	dependent GO term
regulation of acute inflammatory response	0.000203	0.5	dependent GO term
establishment of integrated proviral latency	0.000205	0	dependent GO term
maturation of SSU-rRNA from tricistronic rRNA transcript (SSU-rRNA, 5.8S rRNA, LSU-rRNA)	0.000205	0	dependent GO term
negative regulation of tumor necrosis factor biosynthetic process	0.000205	0	dependent GO term
organelle membrane fusion	0.000205	0	dependent GO term
DNA unwinding involved in DNA replication	0.000205	0.333333	dependent GO term
T-helper 17 cell differentiation	0.000205	0.666667	dependent GO term
cellular response to interferon-alpha	0.000205	0	dependent GO term
carboxylic acid metabolic process	0.000209	0	dependent GO term
regulation of protein serine/threonine kinase activity	0.000216	0.125	dependent GO term
carbohydrate homeostasis	0.000216	0.666667	dependent GO term
glucose homeostasis	0.000216	0.666667	dependent GO term
cardiac muscle tissue development	0.000216	0	dependent GO term
positive regulation of signaling	0.000217	0	dependent GO term
monovalent inorganic cation transport	0.000218	0	dependent GO term
feeding behavior	0.000218	0	dependent GO term
positive regulation of cell communication	0.000219	0	dependent GO term
membrane protein intracellular domain proteolysis	0.00022	0	dependent GO term
Golgi transport vesicle coating	0.00022	0	dependent GO term
COPI-coated vesicle budding	0.00022	0	dependent GO term
COPI coating of Golgi vesicle	0.00022	0	dependent GO term
vesicle localization	0.000221	0	dependent GO term
protein folding	0.000224	0	dependent GO term
protein folding	0.000224	0.142857	dependent GO term
cation homeostasis	0.000224	0.333333	dependent GO term
nucleotide-excision repair	0.000225	0.2	dependent GO term
Notch signaling pathway	0.000225	0	dependent GO term
proteolysis involved in cellular protein catabolic process	0.000226	0.25	dependent GO term
nucleotide-binding oligomerization domain containing 1 signaling pathway	0.000227	0	dependent GO term
cellular macromolecule metabolic process	0.000228	0	dependent GO term
positive regulation of JNK cascade	0.000228	0	dependent GO term
chromatin modification	0.00023	0	dependent GO term
tumor necrosis factor production	0.000232	0	dependent GO term
regulation of tumor necrosis factor production	0.000232	0	dependent GO term
tube development	0.000237	0	independent GO term
positive regulation of cAMP biosynthetic process	0.000239	0	dependent GO term
toll-like receptor signaling pathway	0.000243	0	dependent GO term
monosaccharide metabolic process	0.000246	0	dependent GO term
molting cycle process	0.000248	0	independent GO term
hair cycle process	0.000248	0	dependent GO term
hair follicle development	0.000248	0	dependent GO term
positive regulation of protein ubiquitination	0.000252	0.333333	dependent GO term
viral protein processing	0.000254	0.333333	dependent GO term
amyloid precursor protein catabolic process	0.000254	0	dependent GO term
Golgi vesicle budding	0.000254	0	dependent GO term
DNA damage checkpoint	0.000261	0	dependent GO term
DNA damage checkpoint	0.000261	0	dependent GO term
cellular protein catabolic process	0.000262	0.25	dependent GO term
positive regulation of cAMP metabolic process	0.000263	0	dependent GO term
positive regulation of protein polymerization	0.000263	0	dependent GO term
alpha-beta T cell activation	0.000264	0	dependent GO term
response to magnesium ion	0.000264	0.25	dependent GO term
actin filament-based movement	0.000264	0	dependent GO term
tumor necrosis factor superfamily cytokine production	0.000264	0	dependent GO term
protein deneddylation	0.000264	0	dependent GO term
cullin deneddylation	0.000264	0	dependent GO term
cytoplasmic sequestering of NF-kappaB	0.000264	0.333333	dependent GO term
negative regulation of telomere maintenance	0.000264	0.333333	dependent GO term
ncRNA 3'-end processing	0.000264	0	dependent GO term
maturation of SSU-rRNA	0.000264	0	dependent GO term
negative regulation of interleukin-1 beta production	0.000264	0	dependent GO term
positive regulation of T-helper 1 type immune response	0.000264	0.666667	dependent GO term
CD4-positive, alpha-beta T cell lineage commitment	0.000264	0.666667	dependent GO term
T-helper cell lineage commitment	0.000264	0.666667	dependent GO term
mast cell chemotaxis	0.000264	0.333333	dependent GO term
glomerular visceral epithelial cell development	0.000264	0	dependent GO term
cellular response to estradiol stimulus	0.000264	0.666667	dependent GO term
ncRNA processing	0.00027	0	dependent GO term
mitotic cell cycle checkpoint	0.000271	0.333333	dependent GO term
inner ear morphogenesis	0.000272	0	dependent GO term
activation of immune response	0.000272	0.5	dependent GO term
activation of immune response	0.000272	0	dependent GO term
mRNA catabolic process	0.000274	0	dependent GO term
regulation of cell projection assembly	0.000275	0	dependent GO term
regulation of blood pressure	0.000276	0.333333	independent GO term
regulation of epithelial cell proliferation involved in lung morphogenesis	0.000278	0	dependent GO term
peptidyl-proline hydroxylation to 4-hydroxy-L-proline	0.000278	0.2	dependent GO term
oxygen homeostasis	0.000278	0.2	dependent GO term
negative regulation of type 2 immune response	0.000278	0	dependent GO term
blood vessel endothelial cell differentiation	0.000278	0	dependent GO term
dorsal aorta development	0.000278	0	dependent GO term
regulation of interferon-gamma-mediated signaling pathway	0.000279	0.0909091	dependent GO term
MyD88-dependent toll-like receptor signaling pathway	0.000281	0	dependent GO term
xenobiotic metabolic process	0.000281	1	dependent GO term
chromatin modification	0.000283	0	dependent GO term
cell adhesion	0.000284	0	dependent GO term
cell adhesion	0.000284	0	dependent GO term
biological adhesion	0.000287	0	independent GO term
biological adhesion	0.000287	0	independent GO term
regulation of adenylate cyclase activity	0.000287	0	dependent GO term
regulation of primary metabolic process	0.00029	0	dependent GO term
cellular response to xenobiotic stimulus	0.000291	1	dependent GO term
cellular amide metabolic process	0.000296	1	dependent GO term
cyclic nucleotide metabolic process	0.000296	0.333333	dependent GO term
DNA integrity checkpoint	0.000296	0	dependent GO term
DNA integrity checkpoint	0.000296	0	dependent GO term
regulation of cell morphogenesis	0.000298	0	dependent GO term
lymphocyte activation involved in immune response	0.000298	0	dependent GO term
electron transport chain	0.000302	0	dependent GO term
protein insertion into membrane	0.000305	0.142857	dependent GO term
molting cycle	0.000307	0	independent GO term
hair cycle	0.000307	0	dependent GO term
cell division	0.000307	0.25	independent GO term
regulation of interleukin-6 production	0.000307	0	dependent GO term
cell division	0.000307	0	independent GO term
response to xenobiotic stimulus	0.000307	1	dependent GO term
regulation of cytokine production	0.00031	0	independent GO term
mesenchyme development	0.000312	0	dependent GO term
regulation of response to interferon-gamma	0.000313	0.0909091	dependent GO term
mRNA 3'-end processing	0.000317	0	dependent GO term
regulation of cell division	0.000326	0	independent GO term
interleukin-6 production	0.000326	0	dependent GO term
positive regulation of cyclic nucleotide biosynthetic process	0.000327	0	dependent GO term
myeloid leukocyte differentiation	0.000329	0	dependent GO term
interleukin-6-mediated signaling pathway	0.00033	0.666667	dependent GO term
cellular response to fluid shear stress	0.00033	0	dependent GO term
activation of transmembrane receptor protein tyrosine kinase activity	0.00033	0.666667	dependent GO term
establishment of viral latency	0.00033	0	dependent GO term
regulation of cardioblast differentiation	0.00033	0	dependent GO term
bundle of His cell to Purkinje myocyte communication	0.00033	0	dependent GO term
negative regulation of humoral immune response	0.00033	0.666667	dependent GO term
adult feeding behavior	0.00033	0	dependent GO term
T-helper 17 type immune response	0.00033	0.666667	dependent GO term
alpha-beta T cell lineage commitment	0.00033	0.666667	dependent GO term
oxaloacetate metabolic process	0.00033	0	dependent GO term
succinate metabolic process	0.00033	0.333333	dependent GO term
glomerular epithelial cell development	0.00033	0	dependent GO term
disruption of cells of other organism involved in symbiotic interaction	0.00033	0	dependent GO term
killing of cells in other organism involved in symbiotic interaction	0.00033	0	dependent GO term
positive regulation of MAPK cascade	0.000331	0	dependent GO term
regulation of cellular response to stress	0.000335	0	dependent GO term
microtubule-based movement	0.00034	0	dependent GO term
positive regulation of stress-activated MAPK cascade	0.000341	0	dependent GO term
regulation of cyclase activity	0.000341	0	dependent GO term
complement activation, classical pathway	0.000341	0	dependent GO term
extrinsic apoptotic signaling pathway via death domain receptors	0.000343	0.166667	dependent GO term
regulation of cellular metabolic process	0.000344	0	dependent GO term
pattern recognition receptor signaling pathway	0.000351	0	dependent GO term
positive regulation of stress-activated protein kinase signaling cascade	0.000355	0	dependent GO term
positive regulation of nucleotide biosynthetic process	0.000355	0	dependent GO term
positive regulation of purine nucleotide biosynthetic process	0.000355	0	dependent GO term
tissue morphogenesis	0.000366	0	dependent GO term
oxoacid metabolic process	0.000367	0	dependent GO term
protein targeting	0.000368	0	dependent GO term
virion assembly	0.00037	0.333333	dependent GO term
energy reserve metabolic process	0.000375	0	dependent GO term
negative regulation of mitotic cell cycle phase transition	0.000375	0.333333	dependent GO term
regulation of Ras GTPase activity	0.000375	0	dependent GO term
CD40 signaling pathway	0.000379	0	dependent GO term
meiotic cytokinesis	0.000379	0	dependent GO term
innate immune response-activating signal transduction	0.000381	0	dependent GO term
apoptotic process	0.000382	0.166667	dependent GO term
regulation of lyase activity	0.000385	0	dependent GO term
fibroblast growth factor receptor signaling pathway	0.000388	0.5	dependent GO term
epithelial cell proliferation involved in lung morphogenesis	0.000389	0	dependent GO term
organic acid metabolic process	0.000394	0	dependent GO term
humoral immune response	0.000394	0.666667	dependent GO term
cellular respiration	0.000394	0	dependent GO term
odontogenesis	0.000397	0	dependent GO term
protein activation cascade	0.000397	0	dependent GO term
immune response-regulating signaling pathway	0.000398	0	dependent GO term
immune response-regulating signaling pathway	0.000398	0	dependent GO term
establishment of organelle localization	0.0004	0	independent GO term
programmed cell death	0.000402	0.166667	dependent GO term
pro-B cell differentiation	0.000403	0	dependent GO term
DNA ligation	0.000403	0	dependent GO term
cardiac ventricle formation	0.000403	0	dependent GO term
activation of Rac GTPase activity	0.000403	0	dependent GO term
negative regulation of interleukin-1 production	0.000403	0	dependent GO term
CD4-positive or CD8-positive, alpha-beta T cell lineage commitment	0.000403	0.666667	dependent GO term
receptor guanylyl cyclase signaling pathway	0.000403	0	dependent GO term
receptor localization to synapse	0.000406	0	dependent GO term
synaptic vesicle clustering	0.000406	0	dependent GO term
N-methyl-D-aspartate receptor clustering	0.000406	0	dependent GO term
negative regulation of transcription from RNA polymerase II promoter	0.000409	0	dependent GO term
negative regulation of transcription from RNA polymerase II promoter	0.000409	0	dependent GO term
cell junction assembly	0.000413	0	dependent GO term
toll-like receptor TLR6:TLR2 signaling pathway	0.000417	0	dependent GO term
toll-like receptor TLR1:TLR2 signaling pathway	0.000417	0	dependent GO term
translation	0.000421	0	dependent GO term
translation	0.000421	0	dependent GO term
activation of innate immune response	0.000426	0	dependent GO term
RNA catabolic process	0.000429	0	dependent GO term
toll-like receptor 4 signaling pathway	0.00043	0	dependent GO term
positive regulation of purine nucleotide metabolic process	0.000433	0	dependent GO term
positive regulation of cyclic nucleotide metabolic process	0.000433	0	dependent GO term
regulation of transmembrane receptor protein serine/threonine kinase signaling pathway	0.000433	0	dependent GO term
regulation of transmembrane receptor protein serine/threonine kinase signaling pathway	0.000433	0	dependent GO term
metal ion transport	0.00045	0.333333	dependent GO term
membrane organization	0.00045	0	dependent GO term
regulation of Rho protein signal transduction	0.000453	0	dependent GO term
regulation of defense response	0.000456	0	dependent GO term
negative regulation of organelle organization	0.00046	0.333333	dependent GO term
regulation of synaptic transmission	0.00046	0	dependent GO term
cytokine production	0.000462	0	independent GO term
regulation of type I interferon production	0.000465	0	dependent GO term
positive regulation of transcription from RNA polymerase II promoter	0.000474	0.333333	dependent GO term
protein polyubiquitination	0.000474	0	dependent GO term
RNA 3'-end processing	0.000478	0	dependent GO term
regulation of endopeptidase activity	0.000482	0.166667	dependent GO term
response to laminar fluid shear stress	0.000484	0	dependent GO term
viral latency	0.000484	0	dependent GO term
cardiac conduction system development	0.000484	0	independent GO term
positive regulation of stem cell differentiation	0.000484	0	dependent GO term
outflow tract septum morphogenesis	0.000484	0	dependent GO term
keratan sulfate catabolic process	0.000484	0	dependent GO term
localization within membrane	0.000485	0.142857	independent GO term
positive regulation of nucleotide metabolic process	0.000485	0	dependent GO term
positive regulation of immune system process	0.000489	0	dependent GO term
ear morphogenesis	0.00049	0	dependent GO term
positive regulation of cell cycle	0.00049	0	dependent GO term
central nervous system neuron development	0.000493	0.166667	dependent GO term
chordate embryonic development	0.000497	0	dependent GO term
positive regulation of RNA metabolic process	0.000502	0	dependent GO term
type I interferon production	0.000502	0	dependent GO term
collagen catabolic process	0.000503	0.166667	dependent GO term
JNK cascade	0.000503	0.333333	dependent GO term
regulation of T cell receptor signaling pathway	0.000505	0	dependent GO term
vesicle organization	0.000515	0.25	dependent GO term
peptidyl-proline hydroxylation	0.000519	0.2	dependent GO term
gas homeostasis	0.000519	0.2	dependent GO term
isotype switching to IgE isotypes	0.000519	0	dependent GO term
regulation of isotype switching to IgE isotypes	0.000519	0	dependent GO term
cellular response to sterol depletion	0.000519	0	dependent GO term
SREBP signaling pathway	0.000519	0	dependent GO term
regulation of vasculogenesis	0.000519	0	dependent GO term
embryonic retina morphogenesis in camera-type eye	0.000519	0	dependent GO term
lymphocyte activation	0.000521	0	dependent GO term
embryo development ending in birth or egg hatching	0.000521	0	dependent GO term
toll-like receptor 2 signaling pathway	0.000522	0	dependent GO term
toll-like receptor 2 signaling pathway	0.000522	0	dependent GO term
heart morphogenesis	0.000526	0	dependent GO term
response to wounding	0.000536	0.0909091	dependent GO term
inflammatory response	0.000541	0.333333	dependent GO term
histone acetylation	0.000541	0	dependent GO term
cellular response to fibroblast growth factor stimulus	0.000541	0.5	dependent GO term
regulation of cell adhesion mediated by integrin	0.000545	0.375	independent GO term
positive regulation of gene expression	0.00055	0	dependent GO term
regulation of peptidase activity	0.000554	0.166667	dependent GO term
homeostasis of number of cells	0.000557	0	dependent GO term
cellular modified amino acid metabolic process	0.000565	1	dependent GO term
visual perception	0.000565	0	dependent GO term
nucleotide-binding oligomerization domain containing 2 signaling pathway	0.000568	0	dependent GO term
positive regulation of MAPKKK cascade by fibroblast growth factor receptor signaling pathway	0.000568	0.2	dependent GO term
cholesterol metabolic process	0.000568	0	dependent GO term
protein localization to organelle	0.00057	0	dependent GO term
regulation of telomere maintenance	0.000572	0	dependent GO term
V(D)J recombination	0.000572	0	dependent GO term
regulation of telomere maintenance	0.000572	0.333333	dependent GO term
maturation of 5.8S rRNA	0.000572	0	dependent GO term
histone H2A acetylation	0.000572	0.333333	dependent GO term
positive regulation of protein autophosphorylation	0.000572	0	dependent GO term
coronary vasculature development	0.000572	0.333333	dependent GO term
negative chemotaxis	0.000572	0	dependent GO term
cytokine biosynthetic process	0.000582	0	dependent GO term
protein sumoylation	0.000584	0	dependent GO term
sensory perception of light stimulus	0.000589	0	dependent GO term
establishment of vesicle localization	0.000596	0.25	dependent GO term
cellular response to growth factor stimulus	0.000599	0	dependent GO term
regulation of MAPK cascade	0.000604	0.125	dependent GO term
protein catabolic process	0.000618	0.25	dependent GO term
toll-like receptor 3 signaling pathway	0.000621	0	dependent GO term
nucleus organization	0.000621	0.2	dependent GO term
toll-like receptor 3 signaling pathway	0.000621	0	dependent GO term
cytokine metabolic process	0.000625	0	dependent GO term
organic acid catabolic process	0.000631	0.333333	dependent GO term
carboxylic acid catabolic process	0.000631	0.333333	dependent GO term
regulation of transmission of nerve impulse	0.000631	0	dependent GO term
regulation of tyrosine phosphorylation of Stat3 protein	0.00064	0.0909091	dependent GO term
cytokinesis	0.00064	0.25	dependent GO term
positive regulation of NF-kappaB transcription factor activity	0.00064	0	dependent GO term
lymphocyte differentiation	0.000642	0	dependent GO term
complement activation	0.000643	0	dependent GO term
protein phosphorylation	0.000647	0	dependent GO term
cell junction organization	0.000648	0	dependent GO term
regulation of protein ubiquitination	0.000648	0.333333	dependent GO term
signal transduction	0.000654	0	dependent GO term
purine ribonucleotide biosynthetic process	0.000657	0.333333	dependent GO term
peptidyl-tyrosine phosphorylation	0.000657	0.666667	dependent GO term
multicellular organismal catabolic process	0.000665	0.166667	dependent GO term
mesenchymal-epithelial cell signaling	0.000667	0	dependent GO term
mammary gland formation	0.000667	0	independent GO term
keratinocyte migration	0.000667	0	dependent GO term
CD4-positive, alpha-beta T cell lineage commitment	0.000667	0	dependent GO term
T-helper cell lineage commitment	0.000667	0	dependent GO term
response to sterol depletion	0.000667	0	dependent GO term
ventricular trabecula myocardium morphogenesis	0.000667	0	dependent GO term
regulation of feeding behavior	0.000667	0	dependent GO term
detection of calcium ion	0.000667	0	dependent GO term
renal filtration cell differentiation	0.000667	0	independent GO term
glomerular visceral epithelial cell differentiation	0.000667	0	dependent GO term
positive regulation of epithelial cell proliferation	0.00067	0	dependent GO term
transcription initiation from RNA polymerase II promoter	0.000675	0	dependent GO term
peptidyl-tyrosine modification	0.000675	0.666667	dependent GO term
alpha-amino acid metabolic process	0.000675	0.333333	dependent GO term
negative regulation of translational initiation in response to stress	0.000677	0.166667	dependent GO term
postsynaptic membrane assembly	0.000677	0	dependent GO term
neurotransmitter-gated ion channel clustering	0.000677	0	dependent GO term
postsynaptic density protein 95 clustering	0.000677	0	dependent GO term
transcription elongation from RNA polymerase II promoter	0.000687	0	dependent GO term
response to organonitrogen compound	0.000707	0	dependent GO term
hemopoiesis	0.000707	0	dependent GO term
regulation of glucose transport	0.00071	0.2	independent GO term
regulation of cyclin-dependent protein serine/threonine kinase activity	0.00071	0.2	dependent GO term
adherens junction organization	0.00071	0	dependent GO term
taxis	0.000712	0.333333	dependent GO term
chemotaxis	0.000712	0.333333	dependent GO term
purine nucleotide biosynthetic process	0.000712	0.333333	dependent GO term
positive regulation of innate immune response	0.000712	0	dependent GO term
defense response to virus	0.000712	0	dependent GO term
ribonucleoprotein complex biogenesis	0.000713	0	dependent GO term
amyloid precursor protein metabolic process	0.000726	0	dependent GO term
positive regulation of calcium-mediated signaling	0.00074	0	dependent GO term
regulation of mitotic cell cycle phase transition	0.00074	0.333333	dependent GO term
chromatin organization	0.000751	0	dependent GO term
cell death	0.000754	0.166667	dependent GO term
death	0.000761	0.166667	independent GO term
regulation of neurological system process	0.000769	0	dependent GO term
chromatin organization	0.00077	0	dependent GO term
positive regulation of response to extracellular stimulus	0.00077	0	dependent GO term
positive regulation of response to nutrient levels	0.00077	0	dependent GO term
T cell lineage commitment	0.00077	0.666667	dependent GO term
negative regulation of smooth muscle contraction	0.00077	0	dependent GO term
dicarboxylic acid catabolic process	0.00077	0.333333	dependent GO term
glomerular epithelium development	0.00077	0	dependent GO term
glomerular epithelial cell differentiation	0.00077	0	dependent GO term
vascular smooth muscle contraction	0.00077	0.333333	dependent GO term
protein complex subunit organization	0.000773	0	dependent GO term
internal peptidyl-lysine acetylation	0.000783	0	dependent GO term
ribonucleotide biosynthetic process	0.000789	0.333333	dependent GO term
positive regulation of interleukin-6 biosynthetic process	0.000795	0	dependent GO term
nucleotide-excision repair, DNA incision	0.000795	0	dependent GO term
regulation of anatomical structure morphogenesis	0.000797	0	dependent GO term
Rho protein signal transduction	0.000799	0	dependent GO term
immune response-regulating cell surface receptor signaling pathway	0.000808	0	dependent GO term
cellular ion homeostasis	0.000811	0.333333	dependent GO term
positive regulation of immune response	0.00082	0.5	dependent GO term
positive regulation of immune response	0.00082	0	dependent GO term
tyrosine phosphorylation of Stat3 protein	0.00083	0.0909091	dependent GO term
oncostatin-M-mediated signaling pathway	0.000834	0.0909091	dependent GO term
4-hydroxyproline metabolic process	0.000834	0.2	dependent GO term
cellular response to interleukin-15	0.000834	0	dependent GO term
alpha-beta T cell lineage commitment	0.000834	0	dependent GO term
barbed-end actin filament capping	0.000834	0	dependent GO term
adult feeding behavior	0.000834	0	dependent GO term
peptidyl-lysine acetylation	0.000835	0	dependent GO term
ribose phosphate biosynthetic process	0.00084	0.333333	dependent GO term
regulation of vesicle-mediated transport	0.00084	0	independent GO term
lipid metabolic process	0.000848	0	dependent GO term
purine-containing compound biosynthetic process	0.00085	0.333333	dependent GO term
leukocyte chemotaxis	0.000853	0.333333	dependent GO term
sterol metabolic process	0.000853	0	dependent GO term
G-protein coupled receptor signaling pathway	0.000854	0	dependent GO term
MyD88-dependent toll-like receptor signaling pathway	0.000858	0	dependent GO term
transmembrane receptor protein tyrosine kinase signaling pathway	0.000874	0	dependent GO term
transmembrane receptor protein tyrosine kinase signaling pathway	0.000874	0.25	dependent GO term
immune response-activating signal transduction	0.000876	0	dependent GO term
immune response-activating signal transduction	0.000876	0	dependent GO term
neuron projection extension	0.00088	0.166667	dependent GO term
axon extension	0.00088	0.166667	dependent GO term
SCF-dependent proteasomal ubiquitin-dependent protein catabolic process	0.00088	0	dependent GO term
cellular response to interleukin-6	0.00088	0.666667	dependent GO term
cellular response to lithium ion	0.00088	0	dependent GO term
regulation of ventricular cardiac muscle cell action potential	0.00088	0	dependent GO term
regulation of response to food	0.00088	0	dependent GO term
regulation of interleukin-6 biosynthetic process	0.00088	0	dependent GO term
neurotransmitter biosynthetic process	0.00088	0.333333	dependent GO term
cellular response to estrogen stimulus	0.00088	0.666667	dependent GO term
macromolecular complex assembly	0.000884	0.4	dependent GO term
macromolecular complex assembly	0.000884	0	dependent GO term
positive regulation of nucleobase-containing compound metabolic process	0.000887	0	dependent GO term
response to nitrogen compound	0.000889	0	dependent GO term
BMP signaling pathway	0.000913	0	dependent GO term
vesicle targeting, to, from or within Golgi	0.000915	0	dependent GO term
organism emergence from protective structure	0.000917	0	independent GO term
hatching	0.000917	0	dependent GO term
blastocyst hatching	0.000917	0	dependent GO term
G1/S transition of mitotic cell cycle	0.000926	0	dependent GO term
regulation of GTPase activity	0.000926	0	dependent GO term
internal protein amino acid acetylation	0.000927	0	dependent GO term
placenta development	0.000927	0	independent GO term
hematopoietic or lymphoid organ development	0.00094	0	independent GO term
positive regulation of macromolecule biosynthetic process	0.000942	0	dependent GO term
regulation of cellular macromolecule biosynthetic process	0.000945	0.25	dependent GO term
appendage morphogenesis	0.000946	0	dependent GO term
limb morphogenesis	0.000946	0	dependent GO term
acute inflammatory response	0.000946	0.5	dependent GO term
synaptic transmission	0.000951	0	dependent GO term
synaptic transmission	0.000951	0	dependent GO term
regulation of GTP catabolic process	0.00096	0	dependent GO term
leukocyte activation	0.000962	0	dependent GO term
regulation of cAMP biosynthetic process	0.000967	0	dependent GO term
stress-activated MAPK cascade	0.000971	0.333333	dependent GO term
morphogenesis of embryonic epithelium	0.000985	0	dependent GO term
cation transport	0.000994	0.333333	dependent GO term
extracellular matrix disassembly	0.000995	0.166667	dependent GO term
telomere maintenance via telomerase	0.000997	0	dependent GO term
positive regulation of heart rate	0.000997	0.333333	dependent GO term
formation of translation preinitiation complex	0.000997	0	dependent GO term
regulation of heterotypic cell-cell adhesion	0.000997	0	dependent GO term
regulation of cell-cell adhesion involved in gastrulation	0.000997	0	dependent GO term
oocyte maturation	0.000997	0	dependent GO term
telomere maintenance via telomerase	0.000997	0.333333	dependent GO term
SMAD protein signal transduction	0.000997	0	dependent GO term
negative regulation of protein processing	0.000997	0.666667	dependent GO term
growth hormone secretion	0.000997	0	dependent GO term
decidualization	0.000997	0	dependent GO term
positive regulation of activated T cell proliferation	0.000997	0.666667	dependent GO term
response to interferon-alpha	0.000997	0	dependent GO term
positive regulation of nitrogen compound metabolic process	0.00101	0	dependent GO term
mesenchymal cell differentiation	0.00101	0	dependent GO term
sulfur compound metabolic process	0.00101	1	dependent GO term
stress-activated protein kinase signaling cascade	0.00101	0.333333	dependent GO term
chaperone cofactor-dependent protein refolding	0.00102	0	dependent GO term
retrograde axon cargo transport	0.00102	0.166667	dependent GO term
limb bud formation	0.00102	0	independent GO term
CD4-positive or CD8-positive, alpha-beta T cell lineage commitment	0.00102	0	dependent GO term
Notch signaling involved in heart development	0.00102	0	dependent GO term
response to other organism	0.00102	0	dependent GO term
response to peptidoglycan	0.00102	0	dependent GO term
cellular response to thyroid hormone stimulus	0.00102	0.25	dependent GO term
positive regulation of apoptotic signaling pathway	0.00103	0.142857	dependent GO term
regulation of translational initiation	0.00103	0.166667	dependent GO term
cellular response to oxygen-containing compound	0.00103	0	dependent GO term
DNA recombination	0.00103	0	dependent GO term
DNA recombination	0.00103	0.333333	dependent GO term
DNA recombination	0.00103	0	dependent GO term
camera-type eye development	0.00104	0	dependent GO term
organelle localization	0.00104	0	independent GO term
positive regulation of RNA metabolic process	0.00105	0.25	dependent GO term
cellular macromolecular complex assembly	0.00105	0	dependent GO term
Notch receptor processing	0.00105	0	dependent GO term
organic anion transport	0.00107	0	dependent GO term
apoptotic signaling pathway	0.00108	0.2	dependent GO term
cell adhesion mediated by integrin	0.00109	0.375	dependent GO term
collagen fibril organization	0.00109	0.375	dependent GO term
positive regulation of organelle organization	0.00109	0.142857	dependent GO term
cell activation involved in immune response	0.00109	0	dependent GO term
leukocyte activation involved in immune response	0.00109	0	dependent GO term
ribonucleoprotein complex assembly	0.00109	0	dependent GO term
cell cycle checkpoint	0.00109	0	dependent GO term
cell cycle checkpoint	0.00109	0.333333	dependent GO term
cell cycle checkpoint	0.00109	0	dependent GO term
transcription initiation from RNA polymerase II promoter	0.0011	0.25	dependent GO term
positive regulation of cell proliferation	0.00111	0	dependent GO term
vesicle localization	0.00111	0.25	dependent GO term
macromolecule metabolic process	0.00112	0	dependent GO term
double-strand break repair via nonhomologous end joining	0.00112	0	dependent GO term
protein ADP-ribosylation	0.00112	0	dependent GO term
RNA-dependent DNA replication	0.00112	0	dependent GO term
negative regulation of NF-kappaB import into nucleus	0.00112	0.333333	dependent GO term
cell-cell adhesion involved in gastrulation	0.00112	0	dependent GO term
lymphoid progenitor cell differentiation	0.00112	0	dependent GO term
double-strand break repair via nonhomologous end joining	0.00112	0	dependent GO term
muscle cell fate commitment	0.00112	0	dependent GO term
atrial septum development	0.00112	0	dependent GO term
RNA-dependent DNA replication	0.00112	0.333333	dependent GO term
regulation of appetite	0.00112	0	independent GO term
interleukin-6 biosynthetic process	0.00112	0	dependent GO term
positive regulation of vascular endothelial growth factor receptor signaling pathway	0.00112	0.333333	dependent GO term
Notch signaling pathway	0.00113	0	dependent GO term
endocytosis	0.00113	0	dependent GO term
central nervous system neuron differentiation	0.00113	0	dependent GO term
myeloid cell development	0.00113	0	dependent GO term
retrograde vesicle-mediated transport, Golgi to ER	0.00113	0	dependent GO term
regulation of antigen receptor-mediated signaling pathway	0.00115	0	dependent GO term
cAMP biosynthetic process	0.00115	0	dependent GO term
immune system development	0.00115	0	dependent GO term
ncRNA metabolic process	0.00116	0	dependent GO term
DNA repair	0.00116	0	dependent GO term
mRNA metabolic process	0.00116	0	dependent GO term
regulation of macromolecule biosynthetic process	0.00117	0.25	dependent GO term
positive regulation of gene expression	0.00117	0.25	dependent GO term
cytokine-mediated signaling pathway	0.00117	0	dependent GO term
collagen catabolic process	0.0012	0.166667	dependent GO term
protein activation cascade	0.00121	0	dependent GO term
immune effector process	0.00121	0.5	dependent GO term
immune effector process	0.00121	0	dependent GO term
cellular chemical homeostasis	0.00122	0.333333	dependent GO term
outflow tract septum morphogenesis	0.00122	0	dependent GO term
pulmonary valve development	0.00122	0	dependent GO term
pulmonary valve morphogenesis	0.00122	0	dependent GO term
spinal cord motor neuron cell fate specification	0.00122	0	dependent GO term
MAPK cascade	0.00123	0.125	dependent GO term
regulation of phosphorus metabolic process	0.00123	0	dependent GO term
appendage development	0.00124	0	independent GO term
limb development	0.00124	0	dependent GO term
ribonucleoprotein complex subunit organization	0.00124	0	dependent GO term
response to biotic stimulus	0.00124	0	dependent GO term
regulation of cAMP metabolic process	0.00125	0	dependent GO term
RNA processing	0.00125	0	dependent GO term
protein localization to peroxisome	0.00125	0	dependent GO term
establishment of protein localization to peroxisome	0.00125	0	dependent GO term
protein targeting to peroxisome	0.00125	0	dependent GO term
rRNA transcription	0.00125	0	dependent GO term
regulation of macrophage differentiation	0.00125	0	dependent GO term
tumor necrosis factor biosynthetic process	0.00125	0	dependent GO term
regulation of tumor necrosis factor biosynthetic process	0.00125	0	dependent GO term
positive regulation of defense response to virus by host	0.00125	0.666667	dependent GO term
regulation of anoikis	0.00125	0	dependent GO term
phosphorylation	0.00126	0	dependent GO term
protein acetylation	0.00127	0	dependent GO term
cell projection morphogenesis	0.00127	0	dependent GO term
post-Golgi vesicle-mediated transport	0.00129	0	dependent GO term
epithelium migration	0.00129	0	dependent GO term
epithelial cell migration	0.00129	0	dependent GO term
regulation of metabolic process	0.0013	0	independent GO term
toll-like receptor 4 signaling pathway	0.00131	0	dependent GO term
adenylate cyclase-modulating G-protein coupled receptor signaling pathway	0.00131	0	dependent GO term
negative regulation of RNA metabolic process	0.00133	0.333333	dependent GO term
positive regulation of cellular biosynthetic process	0.00134	0	dependent GO term
mitochondrion organization	0.00135	0.142857	dependent GO term
extracellular matrix organization	0.00135	0.166667	dependent GO term
regulation of cyclic nucleotide biosynthetic process	0.00135	0	dependent GO term
extracellular structure organization	0.00136	0.166667	dependent GO term
ion homeostasis	0.00136	0.333333	dependent GO term
nuclear pore organization	0.00136	0.2	dependent GO term
positive regulation of T cell cytokine production	0.00136	0	dependent GO term
negative regulation of cell cycle phase transition	0.00136	0	dependent GO term
striated muscle cell differentiation	0.00136	0	dependent GO term
negative regulation of cell cycle phase transition	0.00136	0.333333	dependent GO term
negative regulation of cell cycle phase transition	0.00136	0	dependent GO term
cell part morphogenesis	0.00137	0	dependent GO term
single-organism catabolic process	0.00137	0.333333	independent GO term
small molecule catabolic process	0.00137	0.333333	dependent GO term
regulation of purine nucleotide catabolic process	0.00137	0	dependent GO term
proteasomal protein catabolic process	0.00139	0	dependent GO term
response to interleukin-6	0.00139	0.666667	dependent GO term
transcription elongation from RNA polymerase III promoter	0.00139	0	dependent GO term
termination of RNA polymerase III transcription	0.00139	0	dependent GO term
positive regulation of cardiac muscle cell proliferation	0.00139	0	dependent GO term
regulation of heart rate by cardiac conduction	0.00139	0	dependent GO term
histone H2A ubiquitination	0.00139	0	dependent GO term
definitive hemopoiesis	0.00139	0	dependent GO term
forebrain regionalization	0.00139	0	dependent GO term
regulation of T-helper 1 type immune response	0.00139	0.666667	dependent GO term
transcription elongation from RNA polymerase III promoter	0.00139	0	dependent GO term
termination of RNA polymerase III transcription	0.00139	0	dependent GO term
proteasomal protein catabolic process	0.00139	0.333333	dependent GO term
regulation of nucleotide catabolic process	0.00139	0	dependent GO term
regulation of nucleoside metabolic process	0.00139	0	dependent GO term
tissue migration	0.00141	0	independent GO term
regulation of type I interferon production	0.00142	0	dependent GO term
negative regulation of translation in response to stress	0.00142	0.166667	dependent GO term
regulation of type I interferon production	0.00142	0	dependent GO term
lateral sprouting from an epithelium	0.00144	0	dependent GO term
response to interleukin-15	0.00144	0	dependent GO term
atrioventricular valve development	0.00144	0	dependent GO term
heart valve formation	0.00144	0	independent GO term
negative regulation of transcription regulatory region DNA binding	0.00144	0	dependent GO term
chemosensory behavior	0.00144	0	dependent GO term
positive regulation of biosynthetic process	0.00145	0	dependent GO term
positive regulation of transcription from RNA polymerase II promoter	0.00145	0	dependent GO term
cell chemotaxis	0.00146	0.333333	dependent GO term
regulation of cellular component organization	0.00149	0	independent GO term
regulation of nucleotide biosynthetic process	0.0015	0	dependent GO term
regulation of purine nucleotide biosynthetic process	0.0015	0	dependent GO term
positive regulation of protein complex assembly	0.0015	0	dependent GO term
chromosome segregation	0.00151	0.25	independent GO term
interphase	0.00151	0	dependent GO term
response to nutrient levels	0.00152	0.666667	dependent GO term
cellular protein metabolic process	0.00153	0.125	dependent GO term
type I interferon production	0.00153	0	dependent GO term
type I interferon production	0.00153	0	dependent GO term
humoral immune response mediated by circulating immunoglobulin	0.00153	0	dependent GO term
DNA replication	0.00154	0.125	dependent GO term
transmission of nerve impulse	0.00154	0	dependent GO term
transmission of nerve impulse	0.00154	0	dependent GO term
viral process	0.00154	0	dependent GO term
peroxisomal transport	0.00154	0	dependent GO term
regulation of actin cytoskeleton reorganization	0.00154	0	dependent GO term
negative regulation of muscle contraction	0.00154	0	dependent GO term
cobalamin metabolic process	0.00154	0	dependent GO term
induction of positive chemotaxis	0.00154	0.333333	dependent GO term
positive regulation of response to stimulus	0.00155	0	dependent GO term
developmental growth	0.00155	0	dependent GO term
positive regulation of cytokine production	0.00155	0.666667	dependent GO term
regulation of MAPK cascade	0.00156	0	dependent GO term
mesenchyme development	0.00157	0	dependent GO term
immune response-activating cell surface receptor signaling pathway	0.00157	0	dependent GO term
multicellular organismal catabolic process	0.00158	0.166667	dependent GO term
DNA replication	0.00158	0	dependent GO term
DNA replication	0.00158	0	dependent GO term
DNA replication	0.00158	0	dependent GO term
DNA replication	0.00158	0	dependent GO term
positive regulation of RNA metabolic process	0.00159	0	dependent GO term
cell-matrix adhesion	0.00159	0.25	dependent GO term
regulation of intrinsic apoptotic signaling pathway	0.0016	0.142857	dependent GO term
nucleotide biosynthetic process	0.0016	0.333333	dependent GO term
cellular response to peptide	0.00162	0.666667	dependent GO term
cellular response to peptide hormone stimulus	0.00162	0.666667	dependent GO term
cellular response to peptide	0.00162	0	dependent GO term
cellular response to peptide hormone stimulus	0.00162	0	dependent GO term
regulation of innate immune response	0.00163	0	dependent GO term
eye development	0.00163	0	dependent GO term
activation of immune response	0.00164	0	dependent GO term
activation of immune response	0.00164	0	dependent GO term
inner ear development	0.00165	0	independent GO term
nucleoside phosphate biosynthetic process	0.00165	0.333333	dependent GO term
positive regulation of catalytic activity	0.00166	0.166667	dependent GO term
regulation of cellular biosynthetic process	0.00167	0.25	dependent GO term
positive regulation of defense response	0.00168	0	dependent GO term
collagen metabolic process	0.00169	0.166667	dependent GO term
epithelial cell proliferation involved in salivary gland morphogenesis	0.00169	0	dependent GO term
non-recombinational repair	0.00169	0	dependent GO term
positive regulation of signal transduction by p53 class mediator	0.00169	0	dependent GO term
positive regulation of DNA damage response, signal transduction by p53 class mediator	0.00169	0	dependent GO term
early endosome to late endosome transport	0.00169	0.5	dependent GO term
positive regulation of heart contraction	0.00169	0.333333	dependent GO term
non-recombinational repair	0.00169	0	dependent GO term
regulation of T-helper cell differentiation	0.00169	0.666667	dependent GO term
anoikis	0.00169	0	dependent GO term
multicellular organismal signaling	0.00173	0	dependent GO term
multicellular organismal signaling	0.00173	0	dependent GO term
regulation of stress-activated MAPK cascade	0.00176	0	dependent GO term
cellular response to endogenous stimulus	0.00177	0	dependent GO term
stem cell differentiation	0.00177	0	independent GO term
regulation of biosynthetic process	0.00178	0.25	dependent GO term
intracellular protein transport	0.00178	0	dependent GO term
forebrain development	0.00178	0	independent GO term
forebrain development	0.00178	0	independent GO term
regulation of stress-activated protein kinase signaling cascade	0.00179	0	dependent GO term
transmembrane receptor protein serine/threonine kinase signaling pathway	0.0018	0	dependent GO term
transmembrane receptor protein serine/threonine kinase signaling pathway	0.0018	0	dependent GO term
positive regulation of cytoskeleton organization	0.00182	0	dependent GO term
positive regulation of gene expression	0.00183	0	dependent GO term
transforming growth factor beta receptor signaling pathway	0.00185	0.25	dependent GO term
hexose transport	0.00186	0.2	dependent GO term
glucose transport	0.00186	0.2	dependent GO term
regulation of cytokine production	0.00186	0	independent GO term
response to fluid shear stress	0.00186	0	dependent GO term
activation of Rho GTPase activity	0.00186	0	dependent GO term
vitamin transport	0.00186	0	dependent GO term
blood coagulation, fibrin clot formation	0.00186	0	dependent GO term
branching morphogenesis of an epithelial tube	0.00188	0	dependent GO term
protein acylation	0.00188	0	dependent GO term
B cell activation	0.00188	0	dependent GO term
regulation of gene expression	0.00189	0.25	dependent GO term
negative regulation of cellular macromolecule biosynthetic process	0.00189	0.333333	dependent GO term
cellular homeostasis	0.00189	0.333333	dependent GO term
vesicle targeting	0.00189	0	independent GO term
presynaptic membrane assembly	0.0019	0	dependent GO term
cellular response to lipopolysaccharide	0.00191	0	dependent GO term
regulation of keratinocyte proliferation	0.00194	0	dependent GO term
regulation of transcription initiation from RNA polymerase II promoter	0.00194	0	dependent GO term
regulation of developmental pigmentation	0.00194	0	dependent GO term
T cell lineage commitment	0.00194	0	dependent GO term
interleukin-1-mediated signaling pathway	0.00194	0.5	dependent GO term
spinal cord association neuron differentiation	0.00194	0	dependent GO term
vesicle targeting, rough ER to cis-Golgi	0.00194	0.25	dependent GO term
COPII vesicle coating	0.00194	0.25	dependent GO term
negative regulation of cell cycle process	0.00194	0	dependent GO term
negative regulation of cell cycle process	0.00194	0.333333	dependent GO term
negative regulation of cell cycle process	0.00194	0	dependent GO term
monosaccharide transport	0.00195	0.2	dependent GO term
cyclic purine nucleotide metabolic process	0.00195	0	dependent GO term
response to extracellular stimulus	0.00196	0.666667	dependent GO term
peptidyl-lysine modification	0.00198	0	dependent GO term
negative regulation of gene expression	0.00199	0.333333	dependent GO term
regulation of stress fiber assembly	0.00199	0	dependent GO term
regulation of cyclic nucleotide metabolic process	0.002	0	dependent GO term
regulation of Ras protein signal transduction	0.002	0	dependent GO term
regulation of Ras protein signal transduction	0.002	0	dependent GO term
cytoplasmic transport	0.00201	0	dependent GO term
establishment of organelle localization	0.00201	0.25	independent GO term
heterotypic cell-cell adhesion	0.00202	0	dependent GO term
developmental cell growth	0.00204	0.166667	dependent GO term
multicellular organismal macromolecule metabolic process	0.00204	0.166667	dependent GO term
cellular component movement	0.00204	0	independent GO term
positive regulation of nucleobase-containing compound metabolic process	0.00205	0.25	dependent GO term
cellular macromolecule catabolic process	0.00205	0.2	dependent GO term
cellular macromolecule catabolic process	0.00205	0.25	dependent GO term
regulation of cell cycle phase transition	0.00205	0	dependent GO term
regulation of cell cycle phase transition	0.00205	0.333333	dependent GO term
regulation of cell cycle phase transition	0.00205	0	dependent GO term
DNA metabolic process	0.00207	0.166667	dependent GO term
response to virus	0.00207	0	dependent GO term
low-density lipoprotein particle remodeling	0.00208	0.6	dependent GO term
UV protection	0.00208	0	dependent GO term
vesicle coating	0.00208	0	dependent GO term
cAMP metabolic process	0.00209	0	dependent GO term
cyclic nucleotide biosynthetic process	0.00209	0	dependent GO term
T cell differentiation	0.0021	0	dependent GO term
transcription initiation from RNA polymerase II promoter	0.00211	0.1	dependent GO term
bleb assembly	0.00211	0.111111	dependent GO term
positive regulation of response to stimulus	0.00211	0	dependent GO term
positive regulation of immune system process	0.00212	0.5	dependent GO term
positive regulation of immune system process	0.00212	0	dependent GO term
signaling	0.00213	0	independent GO term
single organism signaling	0.00213	0	dependent GO term
chromosome organization	0.00213	0	dependent GO term
myeloid cell differentiation	0.00213	0	independent GO term
myeloid cell differentiation	0.00213	0	independent GO term
cellular response to molecule of bacterial origin	0.00214	0	dependent GO term
GMP biosynthetic process	0.00215	0.0833333	dependent GO term
anion transport	0.00215	0	dependent GO term
negative regulation of nucleobase-containing compound metabolic process	0.00216	0.333333	dependent GO term
protein processing	0.00217	0.5	dependent GO term
hydrogen peroxide metabolic process	0.00219	0.333333	dependent GO term
positive regulation of macromolecule biosynthetic process	0.0022	0.25	dependent GO term
triglyceride catabolic process	0.0022	0	dependent GO term
lens morphogenesis in camera-type eye	0.0022	0	dependent GO term
ribosomal small subunit biogenesis	0.0022	0	dependent GO term
response to food	0.0022	0	dependent GO term
regulation of activated T cell proliferation	0.0022	0.666667	dependent GO term
glutamate metabolic process	0.0022	0.333333	dependent GO term
long-term memory	0.0022	0	dependent GO term
axonogenesis	0.00221	0	dependent GO term
regulation of branching involved in salivary gland morphogenesis	0.00222	0	dependent GO term
SCF-dependent proteasomal ubiquitin-dependent protein catabolic process	0.00222	0	dependent GO term
heart trabecula formation	0.00222	0	dependent GO term
regulation of histone H3-K4 methylation	0.00222	0	dependent GO term
interspecies interaction between organisms	0.00222	0	dependent GO term
symbiosis, encompassing mutualism through parasitism	0.00222	0	dependent GO term
COPII-coated vesicle budding	0.00222	0.25	dependent GO term
cell cycle phase	0.00223	0	dependent GO term
intracellular receptor signaling pathway	0.00224	0.25	dependent GO term
epithelium development	0.00227	0	dependent GO term
membrane protein ectodomain proteolysis	0.00229	0	dependent GO term
hemopoiesis	0.0023	0	dependent GO term
negative regulation of nitrogen compound metabolic process	0.00231	0.333333	dependent GO term
organ morphogenesis	0.00232	0	dependent GO term
immune system process	0.00234	0.0909091	independent GO term
establishment of protein localization to mitochondrion	0.00234	0.142857	dependent GO term
extracellular matrix disassembly	0.00236	0.166667	dependent GO term
DNA-dependent DNA replication	0.00236	0.166667	dependent GO term
growth	0.00236	0	independent GO term
neutral lipid catabolic process	0.00238	0	dependent GO term
acylglycerol catabolic process	0.00238	0	dependent GO term
positive regulation of protein tyrosine kinase activity	0.00238	0.666667	dependent GO term
response to X-ray	0.00238	0	dependent GO term
response to lithium ion	0.00238	0	dependent GO term
gamma-aminobutyric acid signaling pathway	0.00238	0	dependent GO term
regulation of protein autophosphorylation	0.00238	0	dependent GO term
positive regulation of nitrogen compound metabolic process	0.00239	0.25	dependent GO term
immune response-regulating signaling pathway	0.00239	0	dependent GO term
immune response-regulating signaling pathway	0.00239	0	dependent GO term
immune response-regulating signaling pathway	0.00239	0	dependent GO term
glucan biosynthetic process	0.0024	0	dependent GO term
glycogen biosynthetic process	0.0024	0	dependent GO term
cytosolic calcium ion homeostasis	0.00241	0.333333	dependent GO term
negative regulation of macromolecule biosynthetic process	0.00242	0.333333	dependent GO term
protein localization to mitochondrion	0.00243	0.142857	dependent GO term
regulation of small GTPase mediated signal transduction	0.00243	0.166667	dependent GO term
microtubule cytoskeleton organization	0.00243	0.333333	dependent GO term
presynaptic membrane organization	0.00244	0	dependent GO term
response to stress	0.00245	0.0909091	dependent GO term
negative regulation of transcription from RNA polymerase II promoter	0.00245	0	dependent GO term
mitotic cell cycle	0.00247	0.25	dependent GO term
mitotic cell cycle	0.00247	0	dependent GO term
SMAD protein complex assembly	0.0025	0	dependent GO term
positive regulation of interleukin-2 production	0.0025	0	dependent GO term
positive regulation of pseudopodium assembly	0.0025	0	dependent GO term
negative regulation of bone mineralization	0.00252	0.333333	dependent GO term
branch elongation of an epithelium	0.00252	0	dependent GO term
regulation of heterotypic cell-cell adhesion	0.00252	0.5	dependent GO term
regulation of cell-cell adhesion involved in gastrulation	0.00252	0.5	dependent GO term
interferon-alpha production	0.00252	0	dependent GO term
regulation of interferon-alpha production	0.00252	0	dependent GO term
positive regulation of chemokine biosynthetic process	0.00252	0	dependent GO term
negative regulation of multicellular organismal process	0.00255	0.166667	independent GO term
regulation of protein kinase activity	0.00256	0.125	dependent GO term
protein localization to chromosome	0.00257	0	dependent GO term
protein localization to chromosome	0.00257	0.333333	dependent GO term
protein K11-linked ubiquitination	0.00257	0.333333	dependent GO term
disruption of cells of other organism	0.00257	0	dependent GO term
killing of cells of other organism	0.00257	0	dependent GO term
negative regulation of cell cycle	0.00258	0.333333	dependent GO term
regulation of calcium-mediated signaling	0.00259	0	dependent GO term
Golgi vesicle transport	0.0026	0	dependent GO term
Golgi vesicle transport	0.0026	0.25	dependent GO term
regulation of mitotic cell cycle	0.00261	0.333333	dependent GO term
negative regulation of MAP kinase activity	0.00262	0.125	dependent GO term
membrane budding	0.00262	0	dependent GO term
signal release	0.00263	0	dependent GO term
receptor-mediated endocytosis	0.00266	0.2	dependent GO term
positive regulation of sequence-specific DNA binding transcription factor activity	0.00267	0	dependent GO term
cellular response to cytokine stimulus	0.0027	0	dependent GO term
membrane organization	0.0027	0.2	dependent GO term
metal ion transport	0.0027	0	dependent GO term
response to abiotic stimulus	0.00271	0.2	dependent GO term
protein maturation	0.00271	0.5	dependent GO term
regulation of defense response	0.00273	0	dependent GO term
transcription from RNA polymerase II promoter	0.00273	0	dependent GO term
regulation of defense response	0.00273	0	dependent GO term
regulation of sodium ion transport	0.00273	0	dependent GO term
muscle cell differentiation	0.00274	0	independent GO term
cell communication	0.00276	0	independent GO term
regulation of response to external stimulus	0.00276	0.0909091	dependent GO term
multicellular organismal metabolic process	0.00277	0.166667	independent GO term
MAPK cascade	0.00277	0	dependent GO term
cytokine production	0.00277	0	independent GO term
dopamine metabolic process	0.00277	0	dependent GO term
cytoplasmic sequestering of transcription factor	0.00277	0.333333	dependent GO term
keratan sulfate biosynthetic process	0.00277	0	dependent GO term
negative regulation of insulin secretion	0.00277	0	dependent GO term
neurotransmitter metabolic process	0.00277	0.333333	dependent GO term
anatomical structure homeostasis	0.00277	0	dependent GO term
regulation of RNA biosynthetic process	0.00278	0	dependent GO term
regulation of tyrosine phosphorylation of STAT protein	0.00279	0.0909091	dependent GO term
chromosome organization	0.00279	0	dependent GO term
ear development	0.00279	0	dependent GO term
regulation of extrinsic apoptotic signaling pathway	0.0028	0.166667	dependent GO term
cellular response to biotic stimulus	0.00283	0	dependent GO term
response to cholesterol	0.00283	0.333333	dependent GO term
morphogenesis of an epithelial bud	0.00283	0	dependent GO term
embryonic digestive tract morphogenesis	0.00283	0	dependent GO term
nuclear export	0.00283	0.4	dependent GO term
macromolecular complex subunit organization	0.00283	0.4	dependent GO term
macromolecular complex subunit organization	0.00283	0	dependent GO term
cell-cell adhesion involved in gastrulation	0.00283	0.5	dependent GO term
dorsal/ventral axis specification	0.00283	0	dependent GO term
extracellular matrix organization	0.00286	0	dependent GO term
extracellular matrix organization	0.00286	0	dependent GO term
extracellular matrix organization	0.00286	0	dependent GO term
extracellular matrix organization	0.00286	0	dependent GO term
positive regulation of protein homooligomerization	0.00287	0.142857	dependent GO term
extracellular structure organization	0.00288	0	dependent GO term
extracellular structure organization	0.00288	0	dependent GO term
extracellular structure organization	0.00288	0	dependent GO term
extracellular structure organization	0.00288	0	dependent GO term
negative regulation of endothelial cell apoptotic process	0.00295	0	dependent GO term
regulation of pseudopodium assembly	0.00295	0	dependent GO term
Arp2/3 complex-mediated actin nucleation	0.00295	0	dependent GO term
regulation of actin filament bundle assembly	0.00297	0	dependent GO term
endocardial cushion development	0.00298	0	dependent GO term
positive regulation of DNA binding	0.00298	0	dependent GO term
DNA replication initiation	0.00298	0.333333	dependent GO term
regulation of CD4-positive, alpha-beta T cell differentiation	0.00298	0.666667	dependent GO term
positive regulation of positive chemotaxis	0.00298	0.333333	dependent GO term
regulation of vascular endothelial growth factor receptor signaling pathway	0.00298	0.333333	dependent GO term
regulation of Rac protein signal transduction	0.00298	0	dependent GO term
G-protein coupled receptor signaling pathway, coupled to cyclic nucleotide second messenger	0.003	0	dependent GO term
cell activation	0.00301	0	independent GO term
Ras protein signal transduction	0.00303	0.166667	dependent GO term
protein localization to synapse	0.00304	0	dependent GO term
DNA synthesis involved in DNA repair	0.00304	0.166667	dependent GO term
striated muscle tissue development	0.00305	0	dependent GO term
cellular response to transforming growth factor beta stimulus	0.00308	0.25	dependent GO term
activation of cysteine-type endopeptidase activity involved in apoptotic process	0.00309	0.142857	dependent GO term
negative regulation of cellular biosynthetic process	0.00309	0.333333	dependent GO term
establishment of protein localization to plasma membrane	0.00309	0	dependent GO term
nuclear division	0.00313	0.333333	dependent GO term
mitosis	0.00313	0.333333	dependent GO term
nuclear division	0.00313	0.333333	dependent GO term
mitosis	0.00313	0.333333	dependent GO term
energy derivation by oxidation of organic compounds	0.00315	0	dependent GO term
energy derivation by oxidation of organic compounds	0.00315	0	dependent GO term
dendritic cell chemotaxis	0.00317	0.333333	dependent GO term
response to sterol	0.00317	0.333333	dependent GO term
negative regulation of biomineral tissue development	0.00317	0.333333	dependent GO term
thyroid gland development	0.00317	0	dependent GO term
negative regulation of steroid biosynthetic process	0.00317	0	dependent GO term
cardiac epithelial to mesenchymal transition	0.00317	0	dependent GO term
negative regulation of Notch signaling pathway	0.00317	0	dependent GO term
regulation of response to stress	0.00317	0.5	dependent GO term
regulation of response to stress	0.00317	0	dependent GO term
carbohydrate transport	0.00319	0.2	dependent GO term
negative regulation of cell-cell adhesion	0.00319	0	dependent GO term
regulation of transcription from RNA polymerase II promoter in response to hypoxia	0.00319	0	dependent GO term
cardiac atrium development	0.00319	0	dependent GO term
negative regulation of homeostatic process	0.00319	0.333333	dependent GO term
energy coupled proton transmembrane transport, against electrochemical gradient	0.00319	0	dependent GO term
ATP hydrolysis coupled proton transport	0.00319	0	dependent GO term
positive T cell selection	0.00319	0.666667	dependent GO term
glutamine family amino acid catabolic process	0.00319	0.333333	dependent GO term
regulation of positive chemotaxis	0.00319	0.333333	dependent GO term
positive regulation of erythrocyte differentiation	0.00319	0	dependent GO term
modification by host of symbiont morphology or physiology	0.00319	0	dependent GO term
modulation of growth of symbiont involved in interaction with host	0.00319	0	dependent GO term
regulation of growth of symbiont in host	0.00319	0	dependent GO term
negative regulation of growth of symbiont involved in interaction with host	0.00319	0	dependent GO term
negative regulation of growth of symbiont in host	0.00319	0	dependent GO term
single-organism behavior	0.0032	0	dependent GO term
GTP catabolic process	0.0032	0	dependent GO term
stress fiber assembly	0.00321	0	dependent GO term
regulation of RNA metabolic process	0.00323	0	dependent GO term
regulation of kinase activity	0.00323	0.125	dependent GO term
positive regulation of cell projection organization	0.00325	0	dependent GO term
guanosine-containing compound catabolic process	0.00325	0	dependent GO term
regulation of intracellular transport	0.00326	0.142857	independent GO term
protein complex assembly	0.00327	0	dependent GO term
peptidyl-tyrosine phosphorylation	0.00329	0	dependent GO term
nuclear-transcribed mRNA catabolic process	0.00329	0	dependent GO term
negative regulation of biosynthetic process	0.0033	0.333333	dependent GO term
protein complex biogenesis	0.0033	0	dependent GO term
negative regulation of RNA metabolic process	0.00333	0	dependent GO term
negative regulation of RNA metabolic process	0.00333	0	dependent GO term
negative regulation of RNA metabolic process	0.00333	0	dependent GO term
cell morphogenesis involved in neuron differentiation	0.00334	0	dependent GO term
positive regulation of cellular biosynthetic process	0.00335	0.25	dependent GO term
neuron migration	0.00337	0.166667	dependent GO term
peptidyl-tyrosine modification	0.00338	0	dependent GO term
regulation of epithelial cell proliferation	0.00338	0	dependent GO term
neuron projection guidance	0.00338	0	dependent GO term
axon guidance	0.00338	0	dependent GO term
regulation of transcription from RNA polymerase II promoter	0.0034	0.25	dependent GO term
placenta blood vessel development	0.00341	0.5	dependent GO term
intracellular protein transmembrane import	0.00341	0	dependent GO term
peptide cross-linking	0.00341	0	dependent GO term
cellular response to calcium ion	0.00341	0.666667	dependent GO term
activation of Ras GTPase activity	0.00341	0	dependent GO term
DNA duplex unwinding	0.00341	0.333333	dependent GO term
DNA duplex unwinding	0.00341	0.333333	dependent GO term
regulation of CD4-positive, alpha-beta T cell activation	0.00341	0.666667	dependent GO term
fear response	0.00341	0	dependent GO term
DNA duplex unwinding	0.00341	0	dependent GO term
activation of Ras GTPase activity	0.00341	0	dependent GO term
positive regulation of RNA metabolic process	0.00342	0.333333	dependent GO term
regulation of T cell cytokine production	0.00344	0	dependent GO term
angiogenesis	0.00344	0.333333	independent GO term
muscle tissue development	0.00344	0	dependent GO term
membrane protein proteolysis	0.00346	0	dependent GO term
establishment of protein localization to membrane	0.00346	0	dependent GO term
hematopoietic or lymphoid organ development	0.00347	0	independent GO term
defense response	0.00351	0	dependent GO term
labyrinthine layer blood vessel development	0.00352	0	dependent GO term
regulation of receptor internalization	0.00352	0	dependent GO term
regulation of chemokine biosynthetic process	0.00352	0	dependent GO term
response to peptide	0.00352	0.666667	dependent GO term
response to peptide	0.00352	0	dependent GO term
negative regulation of protein modification process	0.00352	0.333333	dependent GO term
peptidyl-tyrosine phosphorylation	0.00355	0.0909091	dependent GO term
neuron projection morphogenesis	0.00356	0	dependent GO term
GTP metabolic process	0.00357	0	dependent GO term
cellular response to growth factor stimulus	0.00358	0	dependent GO term
cellular response to growth factor stimulus	0.00358	0.2	dependent GO term
activation of cysteine-type endopeptidase activity	0.00362	0.142857	dependent GO term
tyrosine phosphorylation of STAT protein	0.00364	0.0909091	dependent GO term
chromosome condensation	0.00364	0	dependent GO term
activation of adenylate cyclase activity	0.00364	0.333333	dependent GO term
oocyte development	0.00364	0	dependent GO term
regulation of cardiac muscle cell action potential	0.00364	0	independent GO term
regulation of cardiac muscle cell contraction	0.00364	0	dependent GO term
negative regulation of peptide hormone secretion	0.00364	0	dependent GO term
maternal placenta development	0.00364	0	dependent GO term
negative regulation of cytokine biosynthetic process	0.00364	0	dependent GO term
regulation of epidermal cell differentiation	0.00364	0	dependent GO term
activated T cell proliferation	0.00364	0.666667	dependent GO term
epithelial cell differentiation involved in kidney development	0.00364	0	dependent GO term
negative regulation of cellular component organization	0.00365	0.333333	dependent GO term
positive regulation of biosynthetic process	0.00367	0.25	dependent GO term
single-organism carbohydrate metabolic process	0.00367	0	dependent GO term
peptidyl-tyrosine modification	0.00368	0.0909091	dependent GO term
cellular response to organic substance	0.0037	0	dependent GO term
toll-like receptor signaling pathway	0.00372	0	dependent GO term
positive regulation of excitatory postsynaptic membrane potential	0.00372	0	dependent GO term
regulation of N-methyl-D-aspartate selective glutamate receptor activity	0.00372	0	dependent GO term
membrane assembly	0.00372	0	dependent GO term
toll-like receptor signaling pathway	0.00372	0	dependent GO term
enzyme linked receptor protein signaling pathway	0.00372	0	dependent GO term
enzyme linked receptor protein signaling pathway	0.00372	0.25	dependent GO term
cellular response to hydrogen peroxide	0.00373	0.333333	dependent GO term
multi-organism transport	0.00373	0.333333	dependent GO term
regulation of transferase activity	0.00374	0.125	dependent GO term
positive regulation of gene expression	0.00374	0.333333	dependent GO term
apoptotic process	0.00374	0.2	dependent GO term
antigen processing and presentation	0.00376	0.166667	dependent GO term
positive regulation of nucleobase-containing compound metabolic process	0.00377	0	dependent GO term
apoptotic signaling pathway	0.00379	0.166667	dependent GO term
guanosine-containing compound metabolic process	0.00379	0	dependent GO term
regulation of immune response	0.00381	0	dependent GO term
regulation of immune response	0.00381	0.5	dependent GO term
regulation of immune response	0.00381	0	dependent GO term
muscle organ development	0.00382	0	dependent GO term
blood circulation	0.00382	0.333333	dependent GO term
urogenital system development	0.00383	0.25	independent GO term
circulatory system process	0.00385	0.333333	dependent GO term
cytoplasmic sequestering of protein	0.00387	0.333333	dependent GO term
negative regulation of response to cytokine stimulus	0.00387	0	dependent GO term
keratan sulfate metabolic process	0.00387	0	dependent GO term
cell communication involved in cardiac conduction	0.00387	0	dependent GO term
cardiac muscle cell contraction	0.00387	0	dependent GO term
DNA geometric change	0.00387	0.333333	dependent GO term
hormone-mediated signaling pathway	0.00387	0	dependent GO term
negative regulation of peptide secretion	0.00387	0	dependent GO term
DNA geometric change	0.00387	0.333333	dependent GO term
DNA geometric change	0.00387	0	dependent GO term
tricarboxylic acid cycle	0.00387	0	dependent GO term
hormone-mediated signaling pathway	0.00387	0.666667	dependent GO term
nitrogen compound transport	0.00388	0.2	dependent GO term
dendritic cell migration	0.00389	0.333333	dependent GO term
mesonephros development	0.00389	0	independent GO term
negative regulation of steroid metabolic process	0.00389	0	dependent GO term
aorta morphogenesis	0.00389	0	dependent GO term
regulation of transcription regulatory region DNA binding	0.00389	0	dependent GO term
chemokine biosynthetic process	0.00389	0	dependent GO term
single-organism behavior	0.00391	0	dependent GO term
ion transport	0.00391	0	dependent GO term
programmed cell death	0.00391	0.2	dependent GO term
chemical homeostasis	0.00394	0.333333	dependent GO term
organelle fission	0.00394	0.333333	dependent GO term
organelle fission	0.00394	0.333333	dependent GO term
regulation of sequence-specific DNA binding transcription factor activity	0.00399	0.142857	dependent GO term
regulation of purine nucleotide metabolic process	0.004	0.333333	dependent GO term
regulation of purine nucleotide metabolic process	0.004	0	dependent GO term
collagen metabolic process	0.00402	0.166667	dependent GO term
collagen catabolic process	0.00403	0.444444	dependent GO term
collagen catabolic process	0.00403	0.375	dependent GO term
ameboidal cell migration	0.00405	0	dependent GO term
DNA repair	0.00408	0.166667	dependent GO term
positive regulation of tumor necrosis factor production	0.00411	0.666667	dependent GO term
oocyte differentiation	0.00411	0	dependent GO term
positive regulation of Rac GTPase activity	0.00411	0	dependent GO term
positive regulation of multicellular organism growth	0.00411	0	dependent GO term
regulation of synapse assembly	0.00411	0	dependent GO term
cellular potassium ion transport	0.00411	0	dependent GO term
potassium ion transmembrane transport	0.00411	0	dependent GO term
G2 DNA damage checkpoint	0.00411	0	dependent GO term
growth involved in symbiotic interaction	0.00411	0	dependent GO term
growth of symbiont involved in interaction with host	0.00411	0	dependent GO term
growth of symbiont in host	0.00411	0	dependent GO term
positive regulation of macromolecule biosynthetic process	0.00413	0	dependent GO term
positive regulation of molecular function	0.00414	0.166667	dependent GO term
cellular response to organonitrogen compound	0.00414	0.666667	dependent GO term
cellular response to organonitrogen compound	0.00414	0	dependent GO term
locomotory behavior	0.00415	0	dependent GO term
regulation of nucleotide metabolic process	0.00418	0.333333	dependent GO term
regulation of nucleotide metabolic process	0.00418	0	dependent GO term
innate immune response	0.0042	0	dependent GO term
innate immune response	0.0042	0.5	dependent GO term
innate immune response	0.0042	0	dependent GO term
platelet activation	0.00426	0	dependent GO term
regulation of T-helper cell differentiation	0.00428	0	dependent GO term
response to exogenous dsRNA	0.00428	0	dependent GO term
dorsal spinal cord development	0.00428	0	independent GO term
motor neuron axon guidance	0.00428	0	dependent GO term
cellular polysaccharide biosynthetic process	0.00428	0	dependent GO term
negative regulation of immune system process	0.00431	0	dependent GO term
mRNA catabolic process	0.00431	0	dependent GO term
cellular response to nutrient levels	0.00432	0.333333	dependent GO term
nucleocytoplasmic transport	0.00433	0	dependent GO term
protein transmembrane transport	0.00436	0	dependent GO term
intracellular protein transmembrane transport	0.00436	0	dependent GO term
protein autoubiquitination	0.00436	0	dependent GO term
DNA strand elongation involved in DNA replication	0.00436	0.333333	dependent GO term
regulation of defense response to virus by host	0.00436	0.666667	dependent GO term
regulation of cell fate commitment	0.00436	0.666667	dependent GO term
CD4-positive, alpha-beta T cell differentiation involved in immune response	0.00436	0.666667	dependent GO term
T-helper cell differentiation	0.00436	0.666667	dependent GO term
interaction with symbiont	0.00436	0	dependent GO term
cellular response to hormone stimulus	0.00439	0.666667	dependent GO term
cellular response to hormone stimulus	0.00439	0	dependent GO term
cellular response to hormone stimulus	0.00439	0.666667	dependent GO term
negative regulation of cellular macromolecule biosynthetic process	0.00444	0	dependent GO term
negative regulation of cellular macromolecule biosynthetic process	0.00444	0	dependent GO term
negative regulation of cellular macromolecule biosynthetic process	0.00444	0	dependent GO term
nuclear transport	0.00445	0	dependent GO term
regulation of small GTPase mediated signal transduction	0.00445	0	dependent GO term
regulation of small GTPase mediated signal transduction	0.00445	0	dependent GO term
neuron cell-cell adhesion	0.00446	0	dependent GO term
regulation of cellular protein metabolic process	0.00451	0.125	dependent GO term
cyclic nucleotide metabolic process	0.00453	0	dependent GO term
regulation of interleukin-6 biosynthetic process	0.00454	0	dependent GO term
semaphorin-plexin signaling pathway	0.00454	0	dependent GO term
cell adhesion	0.00454	0	dependent GO term
biological adhesion	0.00457	0	independent GO term
positive regulation of nitrogen compound metabolic process	0.00459	0	dependent GO term
negative regulation of gene expression	0.00462	0	dependent GO term
negative regulation of gene expression	0.00462	0	dependent GO term
negative regulation of gene expression	0.00462	0	dependent GO term
B cell receptor signaling pathway	0.00462	0.25	dependent GO term
exonucleolytic nuclear-transcribed mRNA catabolic process involved in deadenylation-dependent decay	0.00462	0	dependent GO term
regulation of cardiac muscle cell membrane potential	0.00462	0	independent GO term
negative regulation of protein binding	0.00462	0	dependent GO term
positive regulation of pathway-restricted SMAD protein phosphorylation	0.00462	0	dependent GO term
exonucleolytic nuclear-transcribed mRNA catabolic process involved in deadenylation-dependent decay	0.00462	0	dependent GO term
RNA splicing, via transesterification reactions with bulged adenosine as nucleophile	0.00464	0	dependent GO term
mRNA splicing, via spliceosome	0.00464	0	dependent GO term
immune system development	0.00465	0	dependent GO term
regulation of type 2 immune response	0.00468	0	dependent GO term
regulation of isotype switching	0.00468	0	dependent GO term
aorta development	0.00468	0	dependent GO term
heart trabecula morphogenesis	0.00468	0	dependent GO term
chemokine metabolic process	0.00468	0	dependent GO term
leukocyte differentiation	0.00468	0	independent GO term
cell projection organization	0.00471	0	dependent GO term
regulation of anatomical structure morphogenesis	0.00475	0	dependent GO term
embryo development	0.00482	0	independent GO term
cell morphogenesis	0.00482	0	dependent GO term
negative regulation of RNA metabolic process	0.00483	0	dependent GO term
multicellular organismal macromolecule metabolic process	0.00485	0.166667	dependent GO term
stress-activated MAPK cascade	0.00486	0	dependent GO term
cell-substrate adhesion	0.00486	0.25	dependent GO term
nuclear-transcribed mRNA catabolic process, exonucleolytic	0.00488	0	dependent GO term
proximal/distal pattern formation	0.00488	0.25	dependent GO term
glycerolipid catabolic process	0.00488	0	dependent GO term
positive regulation of adenylate cyclase activity	0.00488	0.333333	dependent GO term
7-methylguanosine mRNA capping	0.00488	0	dependent GO term
male meiosis	0.00488	0.333333	dependent GO term
mismatch repair	0.00488	0.333333	dependent GO term
alpha-beta T cell activation involved in immune response	0.00488	0.666667	dependent GO term
alpha-beta T cell differentiation involved in immune response	0.00488	0.666667	dependent GO term
nuclear-transcribed mRNA catabolic process, exonucleolytic	0.00488	0	dependent GO term
regulation of cellular macromolecule biosynthetic process	0.00489	0	dependent GO term
positive regulation of immune response	0.00489	0	dependent GO term
positive regulation of immune response	0.00489	0	dependent GO term
positive regulation of immune response	0.00489	0	dependent GO term
RNA splicing, via transesterification reactions	0.00492	0	dependent GO term
negative regulation of nucleobase-containing compound metabolic process	0.00493	0	dependent GO term
negative regulation of nucleobase-containing compound metabolic process	0.00493	0	dependent GO term
negative regulation of nucleobase-containing compound metabolic process	0.00493	0	dependent GO term
heart development	0.00495	0.333333	independent GO term
heart development	0.00495	0	independent GO term
heart development	0.00495	0.333333	independent GO term
heart development	0.00495	0.333333	independent GO term
positive regulation of transcription from RNA polymerase II promoter	0.00501	0.25	dependent GO term
immune response-regulating cell surface receptor signaling pathway	0.00501	0	dependent GO term
macromolecule catabolic process	0.00504	0.2	dependent GO term
stress-activated protein kinase signaling cascade	0.00504	0	dependent GO term
vesicle-mediated transport	0.00504	0	dependent GO term
macromolecule catabolic process	0.00504	0.25	dependent GO term
vesicle-mediated transport	0.00504	0	dependent GO term
polysaccharide biosynthetic process	0.00504	0	dependent GO term
G-protein coupled receptor signaling pathway	0.00509	0.2	dependent GO term
male genitalia development	0.00511	0	dependent GO term
dendritic spine morphogenesis	0.00511	0	dependent GO term
heterotypic cell-cell adhesion	0.00511	0.5	dependent GO term
positive regulation of interferon-beta production	0.00511	0	dependent GO term
cellular response to nitrogen compound	0.00512	0.666667	dependent GO term
cellular response to nitrogen compound	0.00512	0	dependent GO term
T cell cytokine production	0.00514	0	dependent GO term
pseudopodium assembly	0.00514	0	dependent GO term
asymmetric cell division	0.00514	0	dependent GO term
DNA recombination	0.00515	0	dependent GO term
regulation of interferon-beta production	0.00515	0.666667	dependent GO term
negative regulation of signal transduction in absence of ligand	0.00515	0	dependent GO term
negative regulation of extrinsic apoptotic signaling pathway in absence of ligand	0.00515	0	dependent GO term
hematopoietic progenitor cell differentiation	0.00515	0	independent GO term
cerebral cortex cell migration	0.00515	0	dependent GO term
negative regulation of BMP signaling pathway	0.00515	0	dependent GO term
trivalent inorganic cation transport	0.00515	0	dependent GO term
ferric iron transport	0.00515	0	dependent GO term
transferrin transport	0.00515	0	dependent GO term
DNA replication-independent nucleosome organization	0.00515	0	dependent GO term
DNA replication-independent nucleosome assembly	0.00515	0	dependent GO term
CENP-A containing nucleosome assembly at centromere	0.00515	0	dependent GO term
histone ubiquitination	0.00515	0	dependent GO term
DNA strand elongation	0.00515	0.333333	dependent GO term
T cell differentiation involved in immune response	0.00515	0.666667	dependent GO term
trivalent inorganic cation transport	0.00515	0.666667	dependent GO term
ferric iron transport	0.00515	0.666667	dependent GO term
transferrin transport	0.00515	0.666667	dependent GO term
negative regulation of BMP signaling pathway	0.00515	0	dependent GO term
organelle organization	0.00517	0	dependent GO term
regulation of response to external stimulus	0.00519	0.166667	dependent GO term
morphogenesis of an epithelium	0.00519	0	dependent GO term
immunoglobulin mediated immune response	0.0052	0	dependent GO term
small GTPase mediated signal transduction	0.00521	0	dependent GO term
small GTPase mediated signal transduction	0.00521	0	dependent GO term
negative regulation of nitrogen compound metabolic process	0.00521	0	dependent GO term
negative regulation of nitrogen compound metabolic process	0.00521	0	dependent GO term
negative regulation of nitrogen compound metabolic process	0.00521	0	dependent GO term
organelle localization	0.00521	0.25	independent GO term
modification of morphology or physiology of other organism involved in symbiotic interaction	0.00522	0	dependent GO term
Ras protein signal transduction	0.00526	0	dependent GO term
Ras protein signal transduction	0.00526	0	dependent GO term
positive regulation of hydrolase activity	0.00527	0.166667	dependent GO term
centrosome localization	0.00528	0.166667	dependent GO term
positive regulation of protein processing	0.00528	0.166667	dependent GO term
regulation of extrinsic apoptotic signaling pathway	0.00529	0.142857	dependent GO term
multicellular organismal catabolic process	0.00532	0.444444	dependent GO term
multicellular organismal catabolic process	0.00532	0.375	dependent GO term
immune response-activating signal transduction	0.00533	0.666667	dependent GO term
[truncated: 2,188 more rows]

## Sheet: early
GO terms	Significance p-value	diseae enrichment ratio	GO term type
[truncated: 3,849 more rows]
