# Supplementary material for: Network stratification analysis for identifying function-specific network layers
Source: Royal Society of Chemistry journal article supplement (doi:10.1039/c5mb00782h), 2016-02-08
Supplement: c5mb00782h1.zip [file Supplementary_Table_S5.xlsx]

## Sheet: normal
GO terms	diseae enrichment ratio	Significance Strength (SS) score	GO term type
transcription from mitochondrial promoter	0.333333	1	independent GO term
transcription initiation from mitochondrial promoter	0.333333	1	independent GO term
negative regulation of macrophage cytokine production	1	1	independent GO term
primary miRNA processing	0.339286	1	independent GO term
maintenance of DNA repeat elements	0.545455	1	independent GO term
positive regulation of helicase activity	0.333333	1	independent GO term
DNA replication initiation	0.266667	1	independent GO term
COPI coating of Golgi vesicle	0.2	0.999993	independent GO term
mismatch repair	0.289474	0.999966	independent GO term
formation of translation preinitiation complex	0.0555556	0.999937	independent GO term
regulation of platelet aggregation	0.695652	0.999928	dependent GO term
SMAD protein complex assembly	0.402778	0.999852	independent GO term
attachment of GPI anchor to protein	0.5	0.999517	independent GO term
interleukin-2-mediated signaling pathway	1	0.999517	independent GO term
regulation of platelet activation	0.716216	0.997943	independent GO term
meiotic mismatch repair	0.333333	0.99674	dependent GO term
SMAD protein import into nucleus	0.708333	0.99674	independent GO term
Tie signaling pathway	1	0.99674	independent GO term
endothelial cell apoptotic process	0.447368	0.99674	independent GO term
negative regulation of endothelial cell apoptotic process	0.535714	0.99674	dependent GO term
positive regulation of interferon-beta production	0.73913	0.990611	independent GO term
histone deacetylation	0.446809	0.98911	independent GO term
regulation of calcium ion-dependent exocytosis	0.542857	0.988411	independent GO term
chromatin assembly	0.367347	0.988411	independent GO term
nucleotide-excision repair, DNA incision	0.333333	0.988411	independent GO term
5S class rRNA transcription from RNA polymerase III type 1 promoter	0.4	0.988411	independent GO term
tRNA transcription from RNA polymerase III promoter	0.4	0.988411	dependent GO term
regulation of endothelial cell apoptotic process	0.697674	0.988411	independent GO term
7-methylguanosine mRNA capping	0.288462	0.985666	independent GO term
protein refolding	0.5	0.979492	independent GO term
autophagic vacuole fusion	0.5	0.978013	independent GO term
MAPK import into nucleus	0.529412	0.978013	independent GO term
mRNA 3'-splice site recognition	0.153846	0.978013	dependent GO term
DNA double-strand break processing	0.153846	0.978013	independent GO term
DNA strand renaturation	0.352941	0.978013	independent GO term
histamine secretion	0.571429	0.978013	independent GO term
desensitization of G-protein coupled receptor protein signaling pathway	0.7	0.978013	independent GO term
desensitization of G-protein coupled receptor protein signaling pathway by arrestin	0.571429	0.978013	dependent GO term
macrophage activation involved in immune response	0.73913	0.978013	independent GO term
immune response-inhibiting cell surface receptor signaling pathway	0.7	0.978013	independent GO term
renal sodium ion transport	1	0.978013	independent GO term
regulation of systemic arterial blood pressure by endothelin	0.5	0.978013	independent GO term
acetyl-CoA biosynthetic process	0.5	0.978013	independent GO term
isocitrate metabolic process	0.125	0.978013	independent GO term
nucleotide-excision repair, DNA incision, 3'-to lesion	0.222222	0.978013	dependent GO term
nucleotide-excision repair, DNA incision, 5'-to lesion	0	0.978013	dependent GO term
mRNA splice site selection	0.157895	0.978013	independent GO term
S-adenosylmethionine biosynthetic process	1	0.978013	independent GO term
sphingomyelin biosynthetic process	0	0.978013	independent GO term
Mo-molybdopterin cofactor biosynthetic process	0	0.978013	independent GO term
inflammatory cell apoptotic process	0.611111	0.978013	independent GO term
adenylate cyclase-inhibiting dopamine receptor signaling pathway	0.583333	0.978013	independent GO term
phospholipase C-activating G-protein coupled acetylcholine receptor signaling pathway	0.666667	0.978013	dependent GO term
G-protein coupled acetylcholine receptor signaling pathway	0.555556	0.978013	independent GO term
gamma-aminobutyric acid signaling pathway	0.545455	0.978013	independent GO term
retrograde axon cargo transport	0.285714	0.978013	dependent GO term
attachment of spindle microtubules to kinetochore	0.40625	0.978013	independent GO term
hormone-mediated apoptotic signaling pathway	1	0.978013	independent GO term
positive regulation of cytoplasmic mRNA processing body assembly	0	0.978013	independent GO term
negative regulation of steroid biosynthetic process	0.608696	0.978013	independent GO term
macroautophagy	0.611111	0.978013	independent GO term
nucleosome positioning	0.333333	0.978013	dependent GO term
positive regulation of protein import into nucleus, translocation	0.542857	0.978013	dependent GO term
CENP-A containing nucleosome assembly at centromere	0.384615	0.978013	dependent GO term
cargo loading into vesicle	0.3	0.978013	independent GO term
phosphatidylinositol-3-phosphate biosynthetic process	0.777778	0.978013	independent GO term
erythropoietin-mediated signaling pathway	0.857143	0.978013	independent GO term
MDA-5 signaling pathway	0.571429	0.978013	independent GO term
eye photoreceptor cell development	0.619048	0.978013	independent GO term
positive regulation of odontogenesis	0.583333	0.978013	independent GO term
detection of triacyl bacterial lipopeptide	1	0.978013	independent GO term
detection of diacyl bacterial lipopeptide	1	0.978013	independent GO term
Golgi to plasma membrane protein transport	0.46875	0.978013	independent GO term
positive regulation of vascular permeability	1	0.978013	independent GO term
histone exchange	0.4	0.978013	dependent GO term
regulation of DNA methylation	0.545455	0.978013	independent GO term
type I interferon biosynthetic process	0.777778	0.978013	independent GO term
positive regulation of interferon-beta biosynthetic process	0.916667	0.978013	independent GO term
negative regulation of Notch signaling pathway	0.521739	0.978013	independent GO term
sphinganine biosynthetic process	0	0.978013	independent GO term
skeletal muscle fiber development	0.5625	0.978013	dependent GO term
killing by host of symbiont cells	0.769231	0.978013	independent GO term
regulation of attachment of spindle microtubules to kinetochore	0.310345	0.978013	independent GO term
cellular process regulating host cell cycle in response to virus	0.571429	0.978013	independent GO term
positive regulation of transcription initiation from RNA polymerase II promoter	0.619048	0.978013	independent GO term
regulation of ventricular cardiac muscle cell membrane repolarization	0.769231	0.978013	independent GO term
positive regulation of mast cell chemotaxis	0.888889	0.978013	independent GO term
DNA cytosine deamination	0	0.978013	independent GO term
neutrophil aggregation	0.75	0.978013	independent GO term
protein localization to chromatin	0.142857	0.978013	independent GO term
cellular response to bacterial lipopeptide	0.818182	0.978013	independent GO term
cellular response to triacyl bacterial lipopeptide	1	0.978013	dependent GO term
cellular response to catecholamine stimulus	0.434783	0.978013	independent GO term
mesonephric tubule development	0.571429	0.978013	independent GO term
negative regulation of intrinsic apoptotic signaling pathway in response to DNA damage by p53 class mediator	0.695652	0.978013	dependent GO term
negative regulation of intrinsic apoptotic signaling pathway in response to DNA damage	0.638889	0.978013	independent GO term
negative regulation of dendritic cell differentiation	0.75	0.978013	independent GO term
regulation of telomere maintenance	0.363636	0.977178	independent GO term
regulation of gene expression by genetic imprinting	0.607143	0.974222	independent GO term
negative regulation of growth of symbiont in host	0.708333	0.974222	independent GO term
negative regulation of JNK cascade	0.522727	0.974222	independent GO term
nucleosome disassembly	0.424242	0.96736	independent GO term
positive regulation of interferon-alpha production	0.761905	0.96736	independent GO term
regulation of interferon-gamma-mediated signaling pathway	0.757143	0.961341	independent GO term
negative regulation of protein catabolic process	0.518519	0.954079	independent GO term
ventricular trabecula myocardium morphogenesis	0.444444	0.940558	independent GO term
G-protein coupled glutamate receptor signaling pathway	0.4375	0.940558	independent GO term
peptidyl-lysine modification to hypusine	0	0.940558	independent GO term
histone monoubiquitination	0.457143	0.940558	dependent GO term
myotube cell development	0.513514	0.940558	independent GO term
rRNA catabolic process	0	0.940558	independent GO term
negative regulation of B cell proliferation	0.583333	0.940558	independent GO term
positive regulation of telomere maintenance	0.166667	0.940558	dependent GO term
positive regulation of intracellular estrogen receptor signaling pathway	0.540541	0.940558	dependent GO term
regulation of protein import into nucleus, translocation	0.571429	0.940558	independent GO term
protein mannosylation	0	0.940558	independent GO term
protein O-linked mannosylation	0	0.940558	dependent GO term
histone H2A monoubiquitination	0.578947	0.940558	dependent GO term
very long-chain fatty acid catabolic process	0.5	0.940558	independent GO term
positive regulation of potassium ion transport	0.641026	0.940558	independent GO term
positive regulation of erythrocyte differentiation	0.622951	0.940558	independent GO term
positive regulation of calcium ion-dependent exocytosis	0.529412	0.940558	dependent GO term
phosphatidylinositol phosphorylation	0.65	0.940558	independent GO term
chaperone mediated protein folding requiring cofactor	0.777778	0.940558	dependent GO term
JAK-STAT cascade involved in growth hormone signaling pathway	0.744186	0.932633	independent GO term
spliceosomal complex assembly	0.162791	0.928344	independent GO term
dendritic cell chemotaxis	0.6	0.928344	independent GO term
tRNA transcription	0.4	0.928344	independent GO term
negative regulation of telomere maintenance	0.388889	0.928344	dependent GO term
extrinsic apoptotic signaling pathway via death domain receptors	0.5875	0.909141	independent GO term
regulation of telomere maintenance via telomerase	0.357143	0.897655	dependent GO term
chaperone-mediated protein folding	0.725	0.897655	independent GO term
NLS-bearing protein import into nucleus	0.290323	0.892704	independent GO term
histone deubiquitination	0.217391	0.892704	independent GO term
positive regulation of cytokinesis	0.519231	0.892704	independent GO term
positive regulation of intracellular steroid hormone receptor signaling pathway	0.525	0.892704	independent GO term
histone H2A ubiquitination	0.461538	0.892704	dependent GO term
ATP-dependent chromatin remodeling	0.407407	0.892704	independent GO term
enucleate erythrocyte differentiation	0.516129	0.892704	independent GO term
isotype switching	0.319149	0.892704	independent GO term
positive regulation of B cell differentiation	0.676471	0.892704	independent GO term
protein localization to chromosome, telomeric region	0.166667	0.892704	independent GO term
histone H4 deacetylation	0.473684	0.892704	dependent GO term
SCF-dependent proteasomal ubiquitin-dependent protein catabolic process	0.5	0.885821	independent GO term
histone lysine methylation	0.403509	0.858042	independent GO term
positive regulation of protein insertion into mitochondrial membrane involved in apoptotic signaling pathway	0.584615	0.845463	independent GO term
N-terminal protein amino acid acetylation	0.488372	0.838358	dependent GO term
mitotic nuclear envelope reassembly	0.461538	0.838358	independent GO term
positive regulation of transforming growth factor beta receptor signaling pathway	0.508197	0.838358	independent GO term
N-terminal protein amino acid modification	0.509804	0.838358	independent GO term
interleukin-4-mediated signaling pathway	1	0.838358	independent GO term
histone H3-K4 methylation	0.421053	0.838358	dependent GO term
spliceosomal snRNP assembly	0.265306	0.829612	independent GO term
histone ubiquitination	0.33871	0.780497	independent GO term
positive regulation of interleukin-2 biosynthetic process	0.758621	0.780497	independent GO term
vesicle transport along microtubule	0.378378	0.780497	independent GO term
nucleotide-excision repair, DNA damage removal	0.303571	0.744525	independent GO term
protein targeting to Golgi	0.5	0.725403	dependent GO term
activation of MAPKKK activity	0.411765	0.725403	independent GO term
inactivation of MAPK activity	0.574074	0.725403	independent GO term
spliceosomal tri-snRNP complex assembly	0.25	0.725403	dependent GO term
retrograde transport, vesicle recycling within Golgi	0.409091	0.725403	independent GO term
regulation of transcription from RNA polymerase II promoter by glucose	0.5	0.725403	independent GO term
acetylcholine catabolic process in synaptic cleft	0.5	0.725403	independent GO term
RNA methylation	0	0.725403	independent GO term
prostaglandin biosynthetic process	0.631579	0.725403	dependent GO term
regulation of chromatin assembly or disassembly	0.428571	0.725403	independent GO term
synaptic transmission, dopaminergic	0.647059	0.725403	independent GO term
norepinephrine-epinephrine vasoconstriction involved in regulation of systemic arterial blood pressure	0.5	0.725403	independent GO term
positive regulation of heart rate by epinephrine-norepinephrine	0.75	0.725403	independent GO term
positive regulation of the force of heart contraction by epinephrine-norepinephrine	1	0.725403	dependent GO term
vasodilation by norepinephrine-epinephrine involved in regulation of systemic arterial blood pressure	0.666667	0.725403	independent GO term
myeloid dendritic cell chemotaxis	0.5	0.725403	dependent GO term
Factor XII activation	0.5	0.725403	independent GO term
mast cell chemotaxis	0.583333	0.725403	independent GO term
positive regulation of T cell tolerance induction	0.722222	0.725403	independent GO term
regulation of glomerular filtration	0.666667	0.725403	independent GO term
negative regulation of glomerular filtration	0.714286	0.725403	dependent GO term
regulation of glycogen catabolic process	0.625	0.725403	independent GO term
acetyl-CoA biosynthetic process from pyruvate	0.6	0.725403	dependent GO term
DNA topological change	0.387097	0.725403	independent GO term
DNA replication, synthesis of RNA primer	0.5	0.725403	independent GO term
DNA replication-dependent nucleosome assembly	0.571429	0.725403	independent GO term
methylation-dependent chromatin silencing	0.5	0.725403	dependent GO term
regulation of transcription from RNA polymerase III promoter	0.5	0.725403	independent GO term
transcription initiation from RNA polymerase III promoter	0.333333	0.725403	independent GO term
arginine catabolic process	1	0.725403	independent GO term
ribosomal protein import into nucleus	0.294118	0.725403	independent GO term
platelet activating factor biosynthetic process	1	0.725403	dependent GO term
prostaglandin metabolic process	0.825	0.725403	independent GO term
C21-steroid hormone biosynthetic process	0.592593	0.725403	independent GO term
cholesterol catabolic process	0.5	0.725403	independent GO term
biotin metabolic process	1	0.725403	independent GO term
zinc ion transport	0	0.725403	independent GO term
post-chaperonin tubulin folding pathway	0	0.725403	independent GO term
negative regulation of transcription from RNA polymerase II promoter during mitosis	0.5	0.725403	independent GO term
mitotic G2 DNA damage checkpoint	0.2	0.725403	independent GO term
activation of transmembrane receptor protein tyrosine kinase activity	0.666667	0.725403	independent GO term
adenylate cyclase-activating dopamine receptor signaling pathway	0.666667	0.725403	independent GO term
phospholipase C-activating G-protein coupled glutamate receptor signaling pathway	0.666667	0.725403	dependent GO term
cytoplasmic sequestering of NF-kappaB	0.470588	0.725403	dependent GO term
JUN phosphorylation	0.6	0.725403	independent GO term
acrosome reaction	0	0.725403	independent GO term
fusion of sperm to egg plasma membrane	0.444444	0.725403	independent GO term
negative regulation of female receptivity	0.5	0.725403	independent GO term
cyclin catabolic process	0.375	0.725403	independent GO term
sulfate transport	0.666667	0.725403	independent GO term
branched-chain amino acid catabolic process	0	0.725403	independent GO term
purine nucleobase biosynthetic process	0	0.725403	independent GO term
snRNA transcription	0	0.725403	independent GO term
auditory receptor cell fate commitment	0.571429	0.725403	independent GO term
negative regulation of cell fate specification	0.294118	0.725403	independent GO term
proteasomal ubiquitin-independent protein catabolic process	0.4	0.725403	independent GO term
regulation of double-strand break repair via homologous recombination	0.4	0.725403	independent GO term
positive regulation of platelet-derived growth factor receptor signaling pathway	1	0.725403	independent GO term
negative regulation of striated muscle cell apoptotic process	0.65	0.725403	independent GO term
positive regulation of norepinephrine secretion	1	0.725403	dependent GO term
regulation of definitive erythrocyte differentiation	0.5	0.725403	independent GO term
regulation of protein kinase A signaling	0.714286	0.725403	independent GO term
negative regulation of plasma membrane long-chain fatty acid transport	0.842105	0.725403	dependent GO term
positive regulation of fibroblast migration	0.76	0.725403	independent GO term
negative regulation of keratinocyte proliferation	0.714286	0.725403	independent GO term
negative regulation of receptor biosynthetic process	0.714286	0.725403	independent GO term
positive regulation of heparan sulfate proteoglycan biosynthetic process	1	0.725403	independent GO term
bile acid and bile salt transport	0.545455	0.725403	independent GO term
plasma membrane long-chain fatty acid transport	0.833333	0.725403	independent GO term
telomere capping	0.5	0.725403	independent GO term
protein import into peroxisome matrix, translocation	0	0.725403	independent GO term
peptidyl-proline modification	0.44186	0.725403	independent GO term
peptidyl-arginine methylation	0.666667	0.725403	independent GO term
protein prenylation	0.333333	0.725403	independent GO term
protein farnesylation	0.5	0.725403	dependent GO term
peptidyl-proline hydroxylation to 4-hydroxy-L-proline	0.5	0.725403	dependent GO term
late viral transcription	0.5	0.725403	independent GO term
dolichol metabolic process	0	0.725403	independent GO term
lipoxygenase pathway	0.857143	0.725403	independent GO term
L-methionine salvage from methylthioadenosine	0.4	0.725403	independent GO term
GDP-mannose metabolic process	0	0.725403	independent GO term
peptide cross-linking via chondroitin 4-sulfate glycosaminoglycan	0.545455	0.725403	independent GO term
spinal cord oligodendrocyte cell fate specification	0.5	0.725403	independent GO term
Wnt signaling pathway involved in forebrain neuroblast division	0.5	0.725403	independent GO term
hyaluronan catabolic process	0.409091	0.725403	independent GO term
intestinal cholesterol absorption	1	0.725403	independent GO term
targeting of mRNA for destruction involved in RNA interference	0.5	0.725403	independent GO term
pre-miRNA processing	0.5	0.725403	independent GO term
replication fork processing	0.4	0.725403	independent GO term
positive regulation of cyclin-dependent protein serine/threonine kinase activity involved in G1/S transition of mitotic cell cycle	0.8	0.725403	independent GO term
protection from non-homologous end joining at telomere	0.5	0.725403	independent GO term
positive regulation of synaptic plasticity	0.1875	0.725403	independent GO term
ISG15-protein conjugation	0.583333	0.725403	independent GO term
positive regulation of synaptic transmission, cholinergic	0.5	0.725403	independent GO term
negative regulation of proteasomal ubiquitin-dependent protein catabolic process	0.424242	0.725403	dependent GO term
negative regulation of protein oligomerization	0.705882	0.725403	independent GO term
negative regulation of protein homooligomerization	0.692308	0.725403	dependent GO term
negative regulation of DNA-templated transcription, elongation	0.4	0.725403	independent GO term
negative regulation of epinephrine secretion	0.666667	0.725403	independent GO term
negative regulation of DNA endoreduplication	0.333333	0.725403	independent GO term
negative regulation of collagen biosynthetic process	0.5	0.725403	independent GO term
negative regulation of peptidyl-serine phosphorylation	0.322581	0.725403	independent GO term
histone H2B ubiquitination	0.571429	0.725403	dependent GO term
fatty acid beta-oxidation using acyl-CoA oxidase	0.5	0.725403	independent GO term
positive regulation of catecholamine secretion	0.818182	0.725403	independent GO term
negative regulation of toll-like receptor signaling pathway	0.592593	0.725403	independent GO term
positive regulation of toll-like receptor signaling pathway	0.823529	0.725403	independent GO term
positive regulation of toll-like receptor 4 signaling pathway	0.5	0.725403	dependent GO term
glial cell apoptotic process	0.666667	0.725403	independent GO term
microtubule anchoring at centrosome	0.384615	0.725403	dependent GO term
histone arginine methylation	0.625	0.725403	independent GO term
mitochondrial protein catabolic process	0.666667	0.725403	independent GO term
negative regulation of renal sodium excretion	1	0.725403	independent GO term
alpha-linolenic acid metabolic process	0.5	0.725403	independent GO term
interleukin-5-mediated signaling pathway	0.714286	0.725403	independent GO term
interleukin-7-mediated signaling pathway	0.875	0.725403	independent GO term
oncostatin-M-mediated signaling pathway	0.666667	0.725403	independent GO term
regulation of dopamine metabolic process	0.5	0.725403	independent GO term
interferon-gamma biosynthetic process	0.764706	0.725403	independent GO term
heme catabolic process	1	0.725403	independent GO term
interleukin-6 biosynthetic process	0.818182	0.725403	independent GO term
negative regulation of circadian sleep/wake cycle, sleep	0.777778	0.725403	dependent GO term
negative regulation of circadian sleep/wake cycle, non-REM sleep	1	0.725403	dependent GO term
negative regulation of NF-kappaB import into nucleus	0.47619	0.725403	independent GO term
negative regulation of tyrosine phosphorylation of Stat3 protein	0.5	0.725403	dependent GO term
negative regulation of tumor necrosis factor biosynthetic process	0.571429	0.725403	independent GO term
mRNA transcription from RNA polymerase II promoter	0.65625	0.725403	independent GO term
glucocorticoid receptor signaling pathway	0.518519	0.725403	independent GO term
cytoplasmic sequestering of transcription factor	0.405405	0.725403	dependent GO term
mast cell degranulation	0.6	0.725403	independent GO term
natural killer cell degranulation	0	0.725403	independent GO term
histone H4-K5 acetylation	0.285714	0.725403	independent GO term
histone H4-K8 acetylation	0.285714	0.725403	independent GO term
canonical Wnt signaling pathway involved in positive regulation of epithelial to mesenchymal transition	1	0.725403	independent GO term
protein import into peroxisome membrane	0.5	0.725403	dependent GO term
negative regulation of interferon-gamma biosynthetic process	0.545455	0.725403	dependent GO term
regulation of circadian sleep/wake cycle, sleep	0.730769	0.725403	independent GO term
negative regulation of interleukin-6 biosynthetic process	0.857143	0.725403	dependent GO term
positive regulation of interleukin-8 biosynthetic process	0.818182	0.725403	independent GO term
regulation of keratinocyte differentiation	0.722222	0.725403	independent GO term
positive regulation of keratinocyte differentiation	0.727273	0.725403	dependent GO term
negative regulation of T-helper 1 cell differentiation	1	0.725403	independent GO term
positive regulation of T-helper 2 cell differentiation	0.76	0.725403	independent GO term
negative regulation of macrophage differentiation	0.647059	0.725403	independent GO term
positive regulation of megakaryocyte differentiation	0.75	0.725403	independent GO term
negative regulation of low-density lipoprotein particle receptor biosynthetic process	1	0.725403	dependent GO term
positive regulation of epidermal growth factor-activated receptor activity	0.681818	0.725403	dependent GO term
negative regulation of mitotic recombination	0.428571	0.725403	independent GO term
negative regulation of striated muscle contraction	0.625	0.725403	independent GO term
negative regulation of JAK-STAT cascade	0.483871	0.725403	independent GO term
platelet activating factor metabolic process	0.714286	0.725403	independent GO term
positive regulation of insulin receptor signaling pathway	0.961538	0.725403	independent GO term
negative regulation of alpha-beta T cell proliferation	1	0.725403	independent GO term
viral mRNA export from host cell nucleus	0	0.725403	independent GO term
positive regulation of protein export from nucleus	0.574074	0.725403	dependent GO term
vesicle fusion with Golgi apparatus	0.538462	0.725403	independent GO term
positive regulation of retinoic acid receptor signaling pathway	0.588235	0.725403	independent GO term
sarcomerogenesis	1	0.725403	independent GO term
3'-phosphoadenosine 5'-phosphosulfate metabolic process	0.461538	0.725403	independent GO term
negative regulation of dendrite morphogenesis	0.578947	0.725403	independent GO term
activated T cell proliferation	0.583333	0.725403	independent GO term
regulation of B cell receptor signaling pathway	0.548387	0.725403	independent GO term
negative regulation of negative chemotaxis	0	0.725403	independent GO term
RNA polymerase II transcriptional preinitiation complex assembly	0.470588	0.725403	independent GO term
cytoplasmic sequestering of protein	0.44	0.725403	independent GO term
maintenance of protein location in nucleus	0.407407	0.725403	independent GO term
histone H3-K9 methylation	0.2	0.725403	dependent GO term
negative regulation of histone H3-K9 methylation	0.222222	0.725403	dependent GO term
negative regulation of transmission of nerve impulse	1	0.725403	independent GO term
positive regulation of telomerase activity	1	0.725403	independent GO term
negative regulation of telomerase activity	0.533333	0.725403	independent GO term
Bergmann glial cell differentiation	0.5	0.725403	independent GO term
cilium morphogenesis	0.470588	0.725403	independent GO term
negative regulation of ryanodine-sensitive calcium-release channel activity	0.888889	0.725403	independent GO term
positive regulation of ryanodine-sensitive calcium-release channel activity	0.928571	0.725403	dependent GO term
negative regulation of pathway-restricted SMAD protein phosphorylation	0.545455	0.725403	dependent GO term
positive regulation of cardiac muscle contraction	0.307692	0.725403	independent GO term
negative regulation of gastric acid secretion	1	0.725403	independent GO term
Clara cell differentiation	0.833333	0.725403	independent GO term
Type II pneumocyte differentiation	0.833333	0.725403	independent GO term
positive regulation of necroptotic process	0.666667	0.725403	independent GO term
regulation of calcidiol 1-monooxygenase activity	0.541667	0.725403	independent GO term
positive regulation of calcidiol 1-monooxygenase activity	0.5	0.725403	dependent GO term
negative regulation of mitotic anaphase-promoting complex activity	0.2	0.725403	dependent GO term
branch elongation involved in salivary gland morphogenesis	0.25	0.725403	independent GO term
mammary gland branching involved in pregnancy	0.666667	0.725403	independent GO term
mesenchymal cell differentiation involved in lung development	0.25	0.725403	independent GO term
apoptotic process involved in luteolysis	0	0.725403	independent GO term
negative regulation of transcription from RNA polymerase II promoter in response to hypoxia	0.5	0.725403	independent GO term
negative regulation of mucus secretion	1	0.725403	independent GO term
chaperone cofactor-dependent protein refolding	0.736842	0.725403	dependent GO term
nucleotide-binding oligomerization domain containing 2 signaling pathway	0.5	0.725403	independent GO term
positive regulation of uterine smooth muscle contraction	0.421053	0.725403	independent GO term
regulation of centromeric sister chromatid cohesion	0.714286	0.725403	independent GO term
histone H3-K27 methylation	0.25	0.725403	dependent GO term
caveola assembly	0.857143	0.725403	independent GO term
regulation of bile acid biosynthetic process	0.714286	0.725403	independent GO term
histone H3 deacetylation	0.555556	0.725403	dependent GO term
CUT catabolic process	0	0.725403	independent GO term
cellular response to caffeine	0.625	0.725403	independent GO term
potassium ion export	1	0.725403	independent GO term
cellular response to diacyl bacterial lipopeptide	1	0.725403	dependent GO term
transcriptional activation by promoter-enhancer looping	0.5	0.725403	independent GO term
positive regulation of fever generation by positive regulation of prostaglandin secretion	0.75	0.725403	independent GO term
TNFSF11-mediated signaling pathway	0.75	0.725403	independent GO term
mitotic cell cycle arrest	0.487805	0.725403	independent GO term
negative regulation of transcription involved in G1/S transition of mitotic cell cycle	0.48	0.725403	independent GO term
minus-end-directed organelle transport along microtubule	0.333333	0.725403	independent GO term
microtubule anchoring at microtubule organizing center	0.421053	0.725403	independent GO term
interleukin-12 secretion	0.583333	0.725403	independent GO term
negative regulation of establishment of protein localization to plasma membrane	0.65	0.725403	independent GO term
positive regulation of synapse maturation	0.285714	0.725403	independent GO term
positive regulation of protein targeting to membrane	0.625	0.725403	independent GO term
alpha-amino-3-hydroxy-5-methyl-4-isoxazole propionate selective glutamate receptor clustering	0.333333	0.725403	independent GO term
N-methyl-D-aspartate receptor clustering	0.375	0.725403	independent GO term
negative regulation of proteasomal protein catabolic process	0.435897	0.725403	dependent GO term
positive regulation of actin cytoskeleton reorganization	0.62069	0.725403	dependent GO term
positive regulation of receptor activity	0.574468	0.725403	independent GO term
positive regulation of chemokine (C-X-C motif) ligand 2 production	1	0.725403	independent GO term
positive regulation of dendritic cell chemotaxis	0.583333	0.725403	independent GO term
positive regulation of gastrulation	0.6	0.725403	independent GO term
positive regulation of metanephric mesenchymal cell migration	0.666667	0.725403	independent GO term
negative regulation of dendritic cell apoptotic process	0.7	0.725403	independent GO term
positive regulation of mesenchymal stem cell differentiation	0.571429	0.725403	independent GO term
positive regulation of cation channel activity	0.7	0.725403	independent GO term
positive regulation of glucose import in response to insulin stimulus	0.933333	0.725403	dependent GO term
lipoxin metabolic process	1	0.725403	independent GO term
interleukin-6-mediated signaling pathway	0.88	0.721359	independent GO term
complement activation, alternative pathway	0.714286	0.698458	independent GO term
RNA-dependent DNA replication	0.608696	0.662594	independent GO term
telomere maintenance via telomerase	0.55	0.662594	dependent GO term
pathway-restricted SMAD protein phosphorylation	0.588235	0.659833	independent GO term
single strand break repair	0.5	0.617825	independent GO term
chromatin silencing at rDNA	0.611111	0.617825	dependent GO term
regulation of the force of heart contraction by chemical signal	0.85	0.617825	independent GO term
citrate metabolic process	0.7	0.617825	independent GO term
bile acid metabolic process	0.5	0.617825	independent GO term
mRNA modification	0.5	0.617825	independent GO term
granulocyte differentiation	0.568182	0.617825	independent GO term
positive regulation of TOR signaling	0.428571	0.617825	independent GO term
positive regulation of cholesterol transport	0.76	0.617825	independent GO term
peptidyl-tyrosine dephosphorylation	0.703125	0.617825	independent GO term
prolactin signaling pathway	0.733333	0.617825	independent GO term
maternal behavior	0.818182	0.617825	independent GO term
histone H4-K16 acetylation	0.35	0.617825	independent GO term
progesterone receptor signaling pathway	0.64	0.617825	independent GO term
negative regulation of cell cycle arrest	0.428571	0.617825	independent GO term
positive regulation of endoplasmic reticulum unfolded protein response	0.714286	0.617825	independent GO term
positive regulation of mitochondrial outer membrane permeabilization involved in apoptotic signaling pathway	0.875	0.617825	independent GO term
intrinsic apoptotic signaling pathway in response to endoplasmic reticulum stress	0.541667	0.605391	independent GO term
histone mRNA metabolic process	0.170213	0.527811	independent GO term
positive regulation of pseudopodium assembly	0.733333	0.526199	independent GO term
negative regulation of telomere maintenance via telomerase	0.384615	0.526199	dependent GO term
positive regulation of natural killer cell differentiation	0.722222	0.526199	independent GO term
regulation of memory T cell differentiation	0.5	0.526199	independent GO term
regulation of translation in response to stress	0.594595	0.526199	independent GO term
regulation of protein export from nucleus	0.545455	0.526199	independent GO term
negative regulation of striated muscle cell differentiation	0.491228	0.526199	independent GO term
response to corticosterone	0.65	0.526199	independent GO term
regulation of N-methyl-D-aspartate selective glutamate receptor activity	0.433333	0.526199	independent GO term
negative regulation of extrinsic apoptotic signaling pathway in absence of ligand	0.755556	0.526199	dependent GO term
GPI anchor biosynthetic process	0	0.450112	independent GO term
DNA damage response, signal transduction by p53 class mediator resulting in transcription of p21 class mediator	0.454545	0.450112	independent GO term
visual learning	0.535714	0.450112	independent GO term
negative regulation of endothelial cell proliferation	0.755556	0.44816	independent GO term
pyrimidine nucleobase catabolic process	0.5	0.44816	independent GO term
regulation of epidermal growth factor-activated receptor activity	0.666667	0.44816	independent GO term
negative regulation of platelet activation	0.789474	0.44816	dependent GO term
regulation of microtubule polymerization	0.538462	0.44816	independent GO term
mitotic G1 DNA damage checkpoint	0.411765	0.44816	independent GO term
RNA polyadenylation	0.264706	0.44816	independent GO term
leukemia inhibitory factor signaling pathway	0.666667	0.44816	independent GO term
positive regulation of synapse assembly	0.481481	0.44816	independent GO term
histone mRNA catabolic process	0.173913	0.44816	dependent GO term
extrinsic apoptotic signaling pathway in absence of ligand	0.8	0.44816	independent GO term
positive regulation of glucose import	0.75	0.413183	independent GO term
negative regulation of gene expression, epigenetic	0.490196	0.404959	independent GO term
DNA methylation	0.415385	0.381692	independent GO term
regulation of actin cytoskeleton reorganization	0.693878	0.381692	independent GO term
negative regulation of insulin receptor signaling pathway	0.72619	0.363296	independent GO term
axon cargo transport	0.59322	0.325082	independent GO term
DNA recombinase assembly	0.25	0.325081	independent GO term
chromatin silencing	0.533333	0.276865	dependent GO term
viral protein processing	0.540541	0.235799	independent GO term
negative regulation of extrinsic apoptotic signaling pathway	0.605839	0.229862	independent GO term
cellular response to glucagon stimulus	0.531915	0.180727	dependent GO term
anterograde axon cargo transport	0.55	0.171035	dependent GO term
response to glucagon	0.553846	0.149883	independent GO term
protein targeting to peroxisome	0.384615	0.0899798	independent GO term

## Sheet: new
GO terms	diseae enrichment ratio	Significance Strength (SS) score	GO term type
immune response-inhibiting cell surface receptor signaling pathway	0.869565	1	independent GO term
mRNA cleavage	0.1875	1	independent GO term
regulation of cardiac muscle contraction by calcium ion signaling	0.692308	1	independent GO term
L-glutamate transport	0.512821	1	independent GO term
purinergic nucleotide receptor signaling pathway	0.333333	1	independent GO term
detection of diacyl bacterial lipopeptide	0.857143	1	independent GO term
positive regulation of tumor necrosis factor biosynthetic process	0.88	1	independent GO term
positive regulation of DNA damage response, signal transduction by p53 class mediator	0.411765	1	independent GO term
regulation of interleukin-12 biosynthetic process	0.74	1	independent GO term
positive regulation of interleukin-12 biosynthetic process	0.885714	1	dependent GO term
cellular response to bacterial lipopeptide	0.857143	1	independent GO term
positive regulation of actin cytoskeleton reorganization	0.666667	1	dependent GO term
DNA damage response, signal transduction by p53 class mediator resulting in cell cycle arrest	0.428571	1	dependent GO term
negative regulation of ubiquitin-protein ligase activity involved in mitotic cell cycle	0.306931	1	dependent GO term
signal transduction involved in cell cycle checkpoint	0.422819	1	independent GO term
negative regulation of ubiquitin-protein ligase activity	0.336066	1	independent GO term
DNA strand elongation involved in DNA replication	0.266667	1	dependent GO term
DNA strand elongation	0.3125	1	independent GO term
regulation of G1/S transition of mitotic cell cycle	0.447917	1	independent GO term
positive regulation of cell cycle arrest	0.428571	1	independent GO term
negative regulation of G1/S transition of mitotic cell cycle	0.42328	1	dependent GO term
positive regulation of ubiquitin-protein ligase activity involved in mitotic cell cycle	0.327731	0.999995	dependent GO term
nucleotide-binding oligomerization domain containing signaling pathway	0.607843	0.999995	independent GO term
anaphase-promoting complex-dependent proteasomal ubiquitin-dependent protein catabolic process	0.323308	0.999988	independent GO term
positive regulation of ubiquitin-protein ligase activity	0.348148	0.999987	independent GO term
regulation of ubiquitin-protein ligase activity involved in mitotic cell cycle	0.325581	0.999981	independent GO term
negative regulation of peptidyl-tyrosine phosphorylation	0.678571	0.999981	independent GO term
telomere maintenance via recombination	0.357143	0.999952	dependent GO term
telomere maintenance via semi-conservative replication	0.318182	0.999952	dependent GO term
DNA damage response, signal transduction by p53 class mediator	0.450495	0.999914	independent GO term
mitotic recombination	0.333333	0.999911	independent GO term
DNA replication initiation	0.25	0.999886	independent GO term
telomere maintenance via telomere lengthening	0.4	0.99978	dependent GO term
regulation of interferon-gamma-mediated signaling pathway	0.755102	0.999435	independent GO term
regulation of mast cell degranulation	0.622222	0.999131	independent GO term
formation of translation preinitiation complex	0.142857	0.999023	independent GO term
negative regulation of MAP kinase activity	0.597484	0.997588	independent GO term
negative regulation of epidermal growth factor receptor signaling pathway	0.52381	0.995518	independent GO term
7-methylguanosine mRNA capping	0.245283	0.995437	independent GO term
DNA recombinase assembly	0.230769	0.995306	independent GO term
glycosphingolipid metabolic process	0.742857	0.995306	independent GO term
RNA polyadenylation	0.318182	0.993253	independent GO term
regulation of platelet aggregation	0.708333	0.993253	independent GO term
activation of NF-kappaB-inducing kinase activity	0.653061	0.992957	independent GO term
peptidyl-lysine modification to hypusine	0	0.991973	independent GO term
maternal behavior	0.769231	0.991973	independent GO term
negative regulation of DNA recombination	0.368421	0.991973	dependent GO term
Tie signaling pathway	0.8	0.991973	independent GO term
chaperone mediated protein folding requiring cofactor	0.666667	0.991973	dependent GO term
chaperone-mediated protein folding	0.568966	0.989546	independent GO term
nucleotide-excision repair, DNA damage removal	0.230769	0.985718	independent GO term
positive regulation of mast cell degranulation	0.615385	0.982974	dependent GO term
telomere maintenance	0.443182	0.975982	independent GO term
regulation of release of sequestered calcium ion into cytosol by sarcoplasmic reticulum	0.7	0.972714	independent GO term
vascular smooth muscle contraction	0.740741	0.972714	independent GO term
attachment of GPI anchor to protein	0.727273	0.972714	independent GO term
chromatin assembly	0.296875	0.972714	independent GO term
negative regulation of telomere maintenance via telomerase	0.56	0.972714	dependent GO term
enucleate erythrocyte differentiation	0.485714	0.972714	independent GO term
clathrin coat assembly	0.409091	0.972714	independent GO term
negative regulation of gene expression, epigenetic	0.491525	0.969821	independent GO term
gene silencing by RNA	0.178571	0.967065	dependent GO term
spliceosomal complex assembly	0.113636	0.96653	independent GO term
activin receptor signaling pathway	0.40625	0.962144	independent GO term
regulation of mitotic recombination	0.285714	0.959907	dependent GO term
protein targeting to Golgi	0.208333	0.959907	dependent GO term
activation of MAPKKK activity	0.555556	0.959907	independent GO term
inactivation of MAPK activity	0.509091	0.959907	dependent GO term
spliceosomal tri-snRNP complex assembly	0	0.959907	dependent GO term
retrograde transport, vesicle recycling within Golgi	0.178571	0.959907	independent GO term
mRNA 3'-splice site recognition	0	0.959907	independent GO term
positive regulation of heart rate by epinephrine-norepinephrine	1	0.959907	independent GO term
positive regulation of the force of heart contraction by epinephrine-norepinephrine	1	0.959907	dependent GO term
macrophage activation involved in immune response	0.6	0.959907	independent GO term
leukocyte migration involved in inflammatory response	0.9	0.959907	independent GO term
positive regulation of T cell tolerance induction	0.642857	0.959907	independent GO term
renal sodium ion transport	1	0.959907	independent GO term
negative regulation of Wnt signaling pathway involved in heart development	0.615385	0.959907	independent GO term
DNA replication-dependent nucleosome assembly	0	0.959907	independent GO term
transcription initiation from mitochondrial promoter	0.5	0.959907	independent GO term
S-adenosylmethionine biosynthetic process	1	0.959907	independent GO term
leukotriene metabolic process	0.65	0.959907	independent GO term
cholesterol catabolic process	1	0.959907	independent GO term
inflammatory cell apoptotic process	0.71875	0.959907	independent GO term
adenylate cyclase-inhibiting dopamine receptor signaling pathway	0.666667	0.959907	independent GO term
gamma-aminobutyric acid signaling pathway	0.413793	0.959907	independent GO term
sensory perception of smell	0.709677	0.959907	independent GO term
auditory receptor cell fate commitment	0.444444	0.959907	independent GO term
negative regulation of cell fate specification	0.586207	0.959907	independent GO term
positive regulation of norepinephrine secretion	1	0.959907	dependent GO term
regulation of protein kinase A signaling	0.555556	0.959907	independent GO term
negative regulation of plasma membrane long-chain fatty acid transport	0.807692	0.959907	dependent GO term
negative regulation of phosphatidylinositol 3-kinase signaling	0.702703	0.959907	dependent GO term
tonic smooth muscle contraction	0.75	0.959907	independent GO term
negative regulation of smooth muscle cell migration	0.771429	0.959907	dependent GO term
dolichol metabolic process	0	0.959907	independent GO term
leukotriene biosynthetic process	0.566667	0.959907	dependent GO term
lipoxygenase pathway	0.666667	0.959907	independent GO term
peptide cross-linking via chondroitin 4-sulfate glycosaminoglycan	0.727273	0.959907	independent GO term
spinal cord oligodendrocyte cell fate specification	0.545455	0.959907	independent GO term
targeting of mRNA for destruction involved in RNA interference	0	0.959907	independent GO term
primary miRNA processing	0.410714	0.959907	independent GO term
pre-miRNA processing	0	0.959907	independent GO term
replication fork processing	0.833333	0.959907	independent GO term
regulation of ARF GTPase activity	0.323529	0.959907	independent GO term
negative regulation of chondrocyte differentiation	0.612245	0.959907	independent GO term
regulation of phospholipase A2 activity	0.578947	0.959907	independent GO term
negative regulation of DNA endoreduplication	0.384615	0.959907	independent GO term
negative regulation of viral transcription	0.527778	0.959907	independent GO term
positive regulation of catecholamine secretion	0.714286	0.959907	independent GO term
microtubule anchoring at centrosome	0.375	0.959907	independent GO term
hair cell differentiation	0.520833	0.959907	independent GO term
cargo loading into vesicle	0.363636	0.959907	independent GO term
endothelial cell chemotaxis	0.625	0.959907	independent GO term
vascular endothelial growth factor signaling pathway	0.774194	0.959907	independent GO term
oncostatin-M-mediated signaling pathway	0.714286	0.959907	independent GO term
MDA-5 signaling pathway	0.583333	0.959907	independent GO term
negative regulation of NF-kappaB import into nucleus	0.526316	0.959907	independent GO term
eye photoreceptor cell development	0.55102	0.959907	independent GO term
detection of triacyl bacterial lipopeptide	0.857143	0.959907	independent GO term
negative regulation of tyrosine phosphorylation of Stat3 protein	0.636364	0.959907	dependent GO term
myeloid dendritic cell differentiation	0.657895	0.959907	independent GO term
maintenance of DNA repeat elements	0.428571	0.959907	independent GO term
negative regulation by host of viral transcription	0.542857	0.959907	dependent GO term
regulation of DNA methylation	0.571429	0.959907	independent GO term
positive regulation of T-helper 2 cell differentiation	0.875	0.959907	independent GO term
negative regulation of fatty acid metabolic process	0.69697	0.959907	independent GO term
negative regulation of mitotic recombination	0.25	0.959907	dependent GO term
negative regulation of striated muscle contraction	0.722222	0.959907	independent GO term
negative regulation of JAK-STAT cascade	0.621622	0.959907	independent GO term
positive regulation of insulin receptor signaling pathway	0.916667	0.959907	independent GO term
mitochondrion transport along microtubule	0.454545	0.959907	dependent GO term
negative regulation of oligodendrocyte differentiation	0.545455	0.959907	independent GO term
positive regulation of helicase activity	0	0.959907	independent GO term
negative regulation of telomerase activity	0.6	0.959907	independent GO term
positive regulation of transcription initiation from RNA polymerase II promoter	0.533333	0.959907	independent GO term
regulation of ventricular cardiac muscle cell membrane repolarization	0.727273	0.959907	dependent GO term
negative regulation of gastric acid secretion	1	0.959907	independent GO term
positive regulation of epithelial cell proliferation involved in lung morphogenesis	0.636364	0.959907	independent GO term
regulation of branching involved in salivary gland morphogenesis by mesenchymal-epithelial signaling	0.533333	0.959907	independent GO term
negative regulation of chemokine-mediated signaling pathway	0.5	0.959907	independent GO term
DNA cytosine deamination	0	0.959907	independent GO term
nucleotide-binding oligomerization domain containing 2 signaling pathway	0.757576	0.959907	dependent GO term
positive regulation of uterine smooth muscle contraction	0.566667	0.959907	independent GO term
neutrophil aggregation	0.75	0.959907	independent GO term
protein localization to chromatin	0.416667	0.959907	independent GO term
potassium ion export	1	0.959907	independent GO term
cellular response to diacyl bacterial lipopeptide	0.833333	0.959907	dependent GO term
cellular response to triacyl bacterial lipopeptide	0.857143	0.959907	dependent GO term
Wnt signaling pathway involved in somitogenesis	0.727273	0.959907	independent GO term
negative regulation of calcium ion import	0.5	0.959907	dependent GO term
semaphorin-plexin signaling pathway involved in bone trabecula morphogenesis	0.333333	0.959907	independent GO term
positive regulation of potassium ion transmembrane transport	1	0.959907	independent GO term
negative regulation of intrinsic apoptotic signaling pathway in response to DNA damage by p53 class mediator	0.625	0.959907	dependent GO term
negative regulation of intrinsic apoptotic signaling pathway in response to DNA damage	0.714286	0.959907	dependent GO term
regulation of cardiac cell fate specification	0.611111	0.959907	independent GO term
positive regulation of natural killer cell chemotaxis	0.857143	0.959907	independent GO term
negative regulation of dendritic cell differentiation	0.875	0.959907	independent GO term
lipoxin metabolic process	0.666667	0.959907	independent GO term
activation of MAPKK activity	0.558252	0.957611	independent GO term
gene silencing	0.360465	0.956715	independent GO term
lipopolysaccharide-mediated signaling pathway	0.753846	0.95296	independent GO term
chromatin silencing	0.48	0.943515	dependent GO term
regulation of telomere maintenance via telomerase	0.548387	0.943515	dependent GO term
regulation of epidermal growth factor-activated receptor activity	0.666667	0.941906	independent GO term
positive regulation of BMP signaling pathway	0.414414	0.941906	independent GO term
interleukin-4-mediated signaling pathway	0.842105	0.941906	independent GO term
histone H2A acetylation	0.55	0.941906	independent GO term
positive regulation of synapse assembly	0.566667	0.941906	independent GO term
regulation of SMAD protein import into nucleus	0.450704	0.941906	independent GO term
positive regulation of SMAD protein import into nucleus	0.432836	0.941906	dependent GO term
Notch signaling involved in heart development	0.52381	0.941906	independent GO term
negative regulation of intrinsic apoptotic signaling pathway	0.663043	0.941906	dependent GO term
vascular endothelial growth factor receptor signaling pathway	0.661765	0.940427	independent GO term
JNK cascade	0.494624	0.939195	independent GO term
regulation of mitotic metaphase/anaphase transition	0.382353	0.937489	independent GO term
regulation of acetyl-CoA biosynthetic process from pyruvate	0.625	0.917955	dependent GO term
regulation of acyl-CoA biosynthetic process	0.692308	0.917955	independent GO term
nucleosome disassembly	0.441176	0.914062	independent GO term
viral protein processing	0.46875	0.914062	independent GO term
actin filament bundle assembly	0.495726	0.914062	independent GO term
intrinsic apoptotic signaling pathway in response to endoplasmic reticulum stress	0.595238	0.914062	independent GO term
pyruvate metabolic process	0.424242	0.9129	independent GO term
mitotic spindle assembly checkpoint	0.309524	0.911963	dependent GO term
positive regulation of T cell cytokine production	0.8125	0.900838	independent GO term
negative regulation of stress-activated MAPK cascade	0.555556	0.900838	independent GO term
positive regulation of blood vessel endothelial cell migration	0.723684	0.900838	independent GO term
positive regulation of interleukin-2 biosynthetic process	0.777778	0.900838	independent GO term
regulation of actin cytoskeleton reorganization	0.575758	0.900838	independent GO term
JAK-STAT cascade involved in growth hormone signaling pathway	0.774194	0.899817	independent GO term
mitotic spindle checkpoint	0.415385	0.897232	dependent GO term
chromatin silencing at rDNA	0.619048	0.895774	dependent GO term
meiotic mismatch repair	0	0.895774	dependent GO term
neutrophil activation involved in immune response	0.516129	0.895774	independent GO term
regulation of the force of heart contraction by chemical signal	0.857143	0.895774	independent GO term
ventricular trabecula myocardium morphogenesis	0.578947	0.895774	independent GO term
glycogen catabolic process	0.809524	0.895774	independent GO term
citrate metabolic process	0.9	0.895774	independent GO term
SMAD protein import into nucleus	0.609756	0.895774	independent GO term
potassium ion import	0.666667	0.895774	independent GO term
positive regulation of telomere maintenance	0.454545	0.895774	dependent GO term
positive regulation of cholesterol transport	0.888889	0.895774	independent GO term
protein mannosylation	0	0.895774	independent GO term
protein O-linked mannosylation	0	0.895774	dependent GO term
negative regulation of DNA damage response, signal transduction by p53 class mediator	0.641026	0.895774	dependent GO term
positive regulation of macrophage differentiation	0.587302	0.895774	independent GO term
phosphatidylinositol phosphorylation	0.653846	0.895774	independent GO term
progesterone receptor signaling pathway	0.409091	0.895774	independent GO term
regulation of membrane repolarization	0.8	0.895774	independent GO term
calcium ion import	0.575	0.895774	independent GO term
regulation of alpha-amino-3-hydroxy-5-methyl-4-isoxazole propionate selective glutamate receptor activity	0.333333	0.895774	independent GO term
double-strand break repair via homologous recombination	0.4	0.884916	independent GO term
negative regulation of mitosis	0.428571	0.88113	independent GO term
organ induction	0.47619	0.878726	independent GO term
positive regulation of glucose metabolic process	0.691176	0.878726	dependent GO term
positive regulation of phosphatidylinositol 3-kinase signaling	0.687023	0.8707	dependent GO term
histone H4 acetylation	0.469136	0.869678	independent GO term
positive regulation of cell morphogenesis involved in differentiation	0.458065	0.866541	independent GO term
mitotic cell cycle checkpoint	0.412903	0.856159	independent GO term
dendritic cell chemotaxis	0.65625	0.851568	dependent GO term
negative regulation of telomere maintenance	0.551724	0.851568	dependent GO term
dendritic cell migration	0.657143	0.851568	independent GO term
interleukin-6-mediated signaling pathway	0.741935	0.851568	independent GO term
regulation of defense response to virus by virus	0.554545	0.848496	independent GO term
positive regulation of epithelial to mesenchymal transition	0.434426	0.835181	dependent GO term
positive regulation of protein catabolic process	0.548913	0.831569	independent GO term
regulation of type I interferon-mediated signaling pathway	0.786667	0.831569	independent GO term
transmembrane receptor protein tyrosine phosphatase signaling pathway	0.411765	0.818835	independent GO term
synaptic vesicle exocytosis	0.473684	0.818835	independent GO term
positive regulation of activin receptor signaling pathway	0.45098	0.818835	independent GO term
nucleotide-excision repair, DNA incision	0.2	0.818835	independent GO term
interleukin-2-mediated signaling pathway	0.9375	0.818835	independent GO term
regulation of memory T cell differentiation	0.75	0.818835	independent GO term
isotype switching	0.410256	0.818835	independent GO term
positive regulation of B cell differentiation	0.621622	0.818835	independent GO term
positive regulation of osteoclast differentiation	0.780488	0.818835	independent GO term
regulation of long-term neuronal synaptic plasticity	0.542373	0.818835	independent GO term
protein localization to chromosome, telomeric region	0.47619	0.818835	independent GO term
regulation of fatty acid transport	0.75	0.818835	independent GO term
positive regulation of T-helper 17 cell lineage commitment	1	0.818835	independent GO term
negative regulation of extrinsic apoptotic signaling pathway in absence of ligand	0.714286	0.818835	dependent GO term
positive regulation of proteolysis	0.546961	0.817417	independent GO term
mismatch repair	0.470588	0.803465	independent GO term
positive regulation of glucose import	0.741176	0.803465	independent GO term
RNA-dependent DNA replication	0.575	0.7964	independent GO term
telomere maintenance via telomerase	0.552632	0.7964	dependent GO term
positive regulation of glycogen biosynthetic process	0.738095	0.7964	dependent GO term
regulation of mRNA processing	0.298701	0.7964	independent GO term
regulation of telomere maintenance	0.536585	0.793951	independent GO term
negative regulation of apoptotic signaling pathway	0.623853	0.789363	independent GO term
regulation of phosphatidylinositol 3-kinase signaling	0.672727	0.783433	independent GO term
positive regulation of proteasomal ubiquitin-dependent protein catabolic process	0.494737	0.757433	dependent GO term
DNA duplex unwinding	0.308824	0.746602	independent GO term
regulation of DNA recombination	0.519481	0.737569	independent GO term
transcription elongation from RNA polymerase III promoter	0.363636	0.737569	independent GO term
termination of RNA polymerase III transcription	0.363636	0.737569	independent GO term
smooth muscle cell migration	0.709091	0.737569	independent GO term
positive regulation of interferon-alpha production	0.583333	0.737569	independent GO term
angiotensin maturation	0.733333	0.736788	independent GO term
regulation of gene expression by genetic imprinting	0.6	0.736788	independent GO term
mitotic nuclear envelope reassembly	0.588235	0.736788	independent GO term
negative regulation of platelet activation	0.866667	0.736788	independent GO term
positive regulation of transforming growth factor beta receptor signaling pathway	0.554217	0.736788	independent GO term
mitotic G1 DNA damage checkpoint	0.46875	0.736788	dependent GO term
negative regulation of cytokine biosynthetic process	0.625	0.736788	independent GO term
positive regulation of mitosis	0.659794	0.736788	independent GO term
negative regulation of JNK cascade	0.534483	0.736788	dependent GO term
leukemia inhibitory factor signaling pathway	0.857143	0.736788	independent GO term
positive regulation of filopodium assembly	0.454545	0.736788	independent GO term
histone mRNA catabolic process	0.192308	0.736788	independent GO term
extrinsic apoptotic signaling pathway in absence of ligand	0.722222	0.736788	independent GO term
histone methylation	0.355263	0.715468	dependent GO term
peptidyl-threonine phosphorylation	0.508197	0.715468	independent GO term
positive regulation of phosphatidylinositol 3-kinase activity	0.647059	0.715468	dependent GO term
negative regulation of extrinsic apoptotic signaling pathway	0.621302	0.715468	dependent GO term
histone deacetylation	0.568966	0.697372	dependent GO term
histone lysine methylation	0.428571	0.697372	dependent GO term
negative regulation of insulin receptor signaling pathway	0.797468	0.697372	independent GO term
signal complex assembly	0.404255	0.677074	independent GO term
regulation of smooth muscle cell migration	0.740741	0.677074	independent GO term
positive regulation of interferon-beta production	0.59375	0.677074	independent GO term
vesicle transport along microtubule	0.428571	0.654763	dependent GO term
negative regulation of anoikis	0.583333	0.654763	independent GO term
MAPK import into nucleus	0.842105	0.639607	independent GO term
regulation of transcription from RNA polymerase II promoter by glucose	0.5	0.639607	independent GO term
DNA double-strand break processing	0.470588	0.639607	independent GO term
DNA strand renaturation	0.392857	0.639607	independent GO term
acetylcholine catabolic process in synaptic cleft	1	0.639607	independent GO term
RNA methylation	0.333333	0.639607	independent GO term
regulation of chromatin assembly or disassembly	0.5	0.639607	independent GO term
norepinephrine-epinephrine vasoconstriction involved in regulation of systemic arterial blood pressure	0.5	0.639607	independent GO term
regulation of blood vessel size by renin-angiotensin	0.875	0.639607	independent GO term
regulation of receptor internalization	0.654545	0.639607	independent GO term
Factor XII activation	1	0.639607	independent GO term
monocyte chemotaxis	0.711111	0.639607	independent GO term
positive regulation of inflammatory response to antigenic stimulus	0.78125	0.639607	independent GO term
positive regulation of acute inflammatory response to antigenic stimulus	0.777778	0.639607	dependent GO term
regulation of systemic arterial blood pressure by endothelin	0.8	0.639607	independent GO term
ventricular cardiac muscle tissue development	1	0.639607	independent GO term
growth plate cartilage development	0.8125	0.639607	independent GO term
regulation of glycogen catabolic process	0.588235	0.639607	dependent GO term
acetyl-CoA biosynthetic process	0.8	0.639607	independent GO term
acetyl-CoA biosynthetic process from pyruvate	1	0.639607	dependent GO term
regulation of gluconeogenesis	0.731707	0.639607	dependent GO term
purine nucleobase metabolic process	0.533333	0.639607	independent GO term
DNA topological change	0.346154	0.639607	independent GO term
DNA ligation	0.380952	0.639607	independent GO term
DNA replication, synthesis of RNA primer	0.5	0.639607	independent GO term
nucleotide-excision repair, DNA incision, 3'-to lesion	0	0.639607	dependent GO term
methylation-dependent chromatin silencing	0.45	0.639607	dependent GO term
regulation of transcription from RNA polymerase III promoter	0.483871	0.639607	independent GO term
transcription initiation from RNA polymerase III promoter	0.5	0.639607	independent GO term
histone mRNA 3'-end processing	0.5	0.639607	independent GO term
tRNA modification	0.526316	0.639607	independent GO term
arginine catabolic process	0.833333	0.639607	independent GO term
thyroid hormone generation	0.9	0.639607	independent GO term
polyamine biosynthetic process	0.25	0.639607	independent GO term
ribosomal protein import into nucleus	0.142857	0.639607	independent GO term
protein retention in ER lumen	0.5	0.639607	independent GO term
phosphatidic acid biosynthetic process	0.761905	0.639607	independent GO term
platelet activating factor biosynthetic process	1	0.639607	dependent GO term
sphingomyelin metabolic process	1	0.639607	independent GO term
C21-steroid hormone biosynthetic process	0.7	0.639607	independent GO term
mineralocorticoid biosynthetic process	0.666667	0.639607	independent GO term
biotin metabolic process	1	0.639607	independent GO term
Mo-molybdopterin cofactor biosynthetic process	0.375	0.639607	independent GO term
zinc ion transport	0.5	0.639607	independent GO term
tubulin complex assembly	0.125	0.639607	independent GO term
post-chaperonin tubulin folding pathway	0	0.639607	independent GO term
negative regulation of transcription from RNA polymerase II promoter during mitosis	0.518519	0.639607	independent GO term
mitotic G2 DNA damage checkpoint	0.352941	0.639607	dependent GO term
common-partner SMAD protein phosphorylation	0.469697	0.639607	independent GO term
adenylate cyclase-activating dopamine receptor signaling pathway	0.714286	0.639607	independent GO term
phospholipase C-activating G-protein coupled glutamate receptor signaling pathway	1	0.639607	independent GO term
phospholipase C-activating G-protein coupled acetylcholine receptor signaling pathway	0.5	0.639607	independent GO term
cytoplasmic sequestering of NF-kappaB	0.565217	0.639607	dependent GO term
JUN phosphorylation	0.692308	0.639607	independent GO term
STAT protein import into nucleus	0.65	0.639607	independent GO term
negative regulation of female receptivity	1	0.639607	dependent GO term
cyclin catabolic process	0.111111	0.639607	independent GO term
branched-chain amino acid catabolic process	0.428571	0.639607	independent GO term
purine nucleobase biosynthetic process	0.5625	0.639607	dependent GO term
GDP-mannose biosynthetic process	0	0.639607	independent GO term
snRNA transcription	0	0.639607	independent GO term
proteasomal ubiquitin-independent protein catabolic process	0.666667	0.639607	independent GO term
negative regulation of autophagy	0.6	0.639607	independent GO term
positive regulation of autophagy	0.5	0.639607	independent GO term
regulation of double-strand break repair via homologous recombination	0.533333	0.639607	dependent GO term
positive regulation of cytoplasmic mRNA processing body assembly	0	0.639607	independent GO term
positive regulation of platelet-derived growth factor receptor signaling pathway	0.5	0.639607	independent GO term
negative regulation of striated muscle cell apoptotic process	0.578947	0.639607	independent GO term
regulation of definitive erythrocyte differentiation	0.5	0.639607	independent GO term
positive regulation of fibroblast migration	0.727273	0.639607	independent GO term
regulation of centrosome duplication	0.372093	0.639607	independent GO term
negative regulation of keratinocyte proliferation	0.583333	0.639607	independent GO term
positive regulation of circadian sleep/wake cycle, wakefulness	0.5	0.639607	independent GO term
positive regulation of receptor biosynthetic process	0.551724	0.639607	independent GO term
negative regulation of receptor biosynthetic process	0.857143	0.639607	independent GO term
positive regulation of heparan sulfate proteoglycan biosynthetic process	0.705882	0.639607	dependent GO term
negative regulation of macrophage cytokine production	0.833333	0.639607	independent GO term
neural crest cell development	0.633333	0.639607	independent GO term
positive regulation of glutamate secretion	0.857143	0.639607	independent GO term
regulation of dopamine secretion	0.633333	0.639607	independent GO term
positive regulation of smooth muscle cell migration	0.744186	0.639607	dependent GO term
bile acid and bile salt transport	0.72	0.639607	independent GO term
telomere capping	0.466667	0.639607	dependent GO term
macroautophagy	0.545455	0.639607	independent GO term
cytidine to uridine editing	0	0.639607	independent GO term
protein import into peroxisome matrix, docking	0	0.639607	independent GO term
protein import into peroxisome matrix, translocation	0.5	0.639607	independent GO term
histone phosphorylation	0.57377	0.639607	independent GO term
nucleosome positioning	0.285714	0.639607	dependent GO term
keratan sulfate biosynthetic process	0.538462	0.639607	independent GO term
peptidyl-arginine methylation	0.4	0.639607	dependent GO term
protein prenylation	0.166667	0.639607	independent GO term
protein farnesylation	0	0.639607	dependent GO term
peptidyl-proline hydroxylation to 4-hydroxy-L-proline	0.555556	0.639607	independent GO term
late viral transcription	0.5	0.639607	independent GO term
cGMP-mediated signaling	0.863636	0.639607	independent GO term
visceral motor neuron differentiation	0.5	0.639607	independent GO term
cerebral cortex radially oriented cell migration	0.37931	0.639607	dependent GO term
Wnt signaling pathway involved in forebrain neuroblast division	1	0.639607	independent GO term
convergent extension involved in neural plate elongation	0.25	0.639607	independent GO term
telencephalon cell migration	0.521368	0.639607	independent GO term
proteoglycan biosynthetic process	0.6	0.639607	independent GO term
hyaluronan catabolic process	0.578947	0.639607	independent GO term
intestinal cholesterol absorption	0.5	0.639607	independent GO term
negative regulation of bone mineralization	0.666667	0.639607	independent GO term
plasminogen activation	0.809524	0.639607	independent GO term
positive regulation of cyclin-dependent protein serine/threonine kinase activity involved in G1/S transition of mitotic cell cycle	0.525641	0.639607	dependent GO term
positive regulation of lipopolysaccharide-mediated signaling pathway	0.692308	0.639607	independent GO term
protection from non-homologous end joining at telomere	0.636364	0.639607	dependent GO term
positive regulation of synaptic plasticity	0.222222	0.639607	independent GO term
negative regulation of TOR signaling	0.571429	0.639607	independent GO term
positive regulation of synaptic transmission, cholinergic	0.75	0.639607	independent GO term
positive regulation of synaptic transmission, GABAergic	0.652174	0.639607	independent GO term
purine nucleotide salvage	1	0.639607	independent GO term
positive regulation of prostaglandin secretion	0.772727	0.639607	dependent GO term
aldosterone biosynthetic process	0.666667	0.639607	dependent GO term
negative regulation of protein oligomerization	0.636364	0.639607	independent GO term
negative regulation of protein homooligomerization	0.428571	0.639607	dependent GO term
regulation of natural killer cell proliferation	0.866667	0.639607	independent GO term
negative regulation of peptidyl-serine phosphorylation	0.595745	0.639607	independent GO term
positive regulation of protein import into nucleus, translocation	0.7	0.639607	independent GO term
histone H2B ubiquitination	0.411765	0.639607	independent GO term
fatty acid beta-oxidation using acyl-CoA oxidase	0	0.639607	independent GO term
positive regulation of NAD(P)H oxidase activity	0.875	0.639607	independent GO term
negative regulation of heterotypic cell-cell adhesion	0.904762	0.639607	independent GO term
positive regulation of toll-like receptor signaling pathway	0.769231	0.639607	independent GO term
positive regulation of toll-like receptor 4 signaling pathway	1	0.639607	dependent GO term
cortisol biosynthetic process	0.666667	0.639607	independent GO term
histone arginine methylation	0.5	0.639607	dependent GO term
negative regulation of protein dephosphorylation	0.545455	0.639607	dependent GO term
mitochondrial protein catabolic process	0.444444	0.639607	independent GO term
negative regulation of renal sodium excretion	1	0.639607	independent GO term
phosphatidylinositol-3-phosphate biosynthetic process	0.791667	0.639607	independent GO term
alpha-linolenic acid metabolic process	0	0.639607	independent GO term
phosphatidylglycerol acyl-chain remodeling	0.9	0.639607	independent GO term
phosphatidylinositol acyl-chain remodeling	0.9	0.639607	independent GO term
phosphatidylserine acyl-chain remodeling	0.9	0.639607	independent GO term
phosphatidylcholine acyl-chain remodeling	0.9	0.639607	independent GO term
phosphatidylethanolamine acyl-chain remodeling	0.9	0.639607	independent GO term
opioid receptor signaling pathway	0.5	0.639607	independent GO term
interleukin-7-mediated signaling pathway	0.857143	0.639607	independent GO term
interleukin-23-mediated signaling pathway	1	0.639607	independent GO term
interleukin-3-mediated signaling pathway	0.714286	0.639607	independent GO term
erythropoietin-mediated signaling pathway	1	0.639607	independent GO term
regulation of dopamine metabolic process	0.7	0.639607	independent GO term
interferon-gamma biosynthetic process	0.833333	0.639607	independent GO term
cellular response to glucose starvation	0.618182	0.639607	independent GO term
heme catabolic process	0.333333	0.639607	independent GO term
interleukin-6 biosynthetic process	0.5	0.639607	independent GO term
negative regulation of circadian sleep/wake cycle, non-REM sleep	0.9	0.639607	dependent GO term
keratan sulfate catabolic process	0.692308	0.639607	independent GO term
negative regulation of tumor necrosis factor biosynthetic process	0.818182	0.639607	dependent GO term
glucocorticoid receptor signaling pathway	0.615385	0.639607	independent GO term
regulation of amyloid precursor protein biosynthetic process	0.25	0.639607	dependent GO term
cytoplasmic sequestering of transcription factor	0.489796	0.639607	dependent GO term
positive regulation of vascular permeability	0.5	0.639607	independent GO term
mast cell degranulation	0.64	0.639607	dependent GO term
neutrophil degranulation	0.45	0.639607	dependent GO term
natural killer cell degranulation	0.333333	0.639607	dependent GO term
histone H4-K5 acetylation	0.263158	0.639607	dependent GO term
histone H4-K8 acetylation	0.263158	0.639607	dependent GO term
Wnt signaling pathway involved in dorsal/ventral axis specification	0.8	0.639607	independent GO term
canonical Wnt signaling pathway involved in positive regulation of epithelial to mesenchymal transition	0.705882	0.639607	independent GO term
protein import into peroxisome membrane	0.25	0.639607	dependent GO term
negative regulation of interferon-gamma biosynthetic process	1	0.639607	dependent GO term
regulation of circadian sleep/wake cycle, non-REM sleep	0.714286	0.639607	independent GO term
regulation of isotype switching	0.725	0.639607	dependent GO term
type I interferon biosynthetic process	0.75	0.639607	independent GO term
positive regulation of interferon-beta biosynthetic process	0.75	0.639607	independent GO term
regulation of interleukin-6 biosynthetic process	0.8	0.639607	independent GO term
negative regulation of interleukin-6 biosynthetic process	0.6	0.639607	dependent GO term
positive regulation of interleukin-6 biosynthetic process	0.947368	0.639607	dependent GO term
negative regulation of B cell differentiation	0.333333	0.639607	dependent GO term
regulation of keratinocyte differentiation	0.575	0.639607	independent GO term
positive regulation of keratinocyte differentiation	0.538462	0.639607	dependent GO term
negative regulation of T-helper 1 cell differentiation	0.857143	0.639607	independent GO term
negative regulation of erythrocyte differentiation	0.666667	0.639607	independent GO term
negative regulation of macrophage differentiation	1	0.639607	dependent GO term
positive regulation of megakaryocyte differentiation	0.6	0.639607	independent GO term
negative regulation of osteoclast differentiation	0.767442	0.639607	dependent GO term
low-density lipoprotein particle receptor biosynthetic process	0.933333	0.639607	independent GO term
negative regulation of low-density lipoprotein particle receptor biosynthetic process	1	0.639607	dependent GO term
negative regulation of gluconeogenesis	0.454545	0.639607	dependent GO term
positive regulation of epidermal growth factor-activated receptor activity	0.736842	0.639607	dependent GO term
positive regulation of epidermal growth factor receptor signaling pathway	0.55	0.639607	dependent GO term
negative regulation of Notch signaling pathway	0.666667	0.639607	independent GO term
regulation of female receptivity	0.684211	0.639607	independent GO term
positive regulation of circadian sleep/wake cycle, REM sleep	1	0.639607	independent GO term
glucose import	0.736842	0.639607	independent GO term
negative regulation of glucose import	0.72	0.639607	dependent GO term
platelet activating factor metabolic process	0.888889	0.639607	independent GO term
sphingosine biosynthetic process	1	0.639607	independent GO term
negative regulation of alpha-beta T cell proliferation	0.611111	0.639607	independent GO term
viral budding	0	0.639607	independent GO term
regulation of RNA export from nucleus	0.333333	0.639607	independent GO term
negative regulation of RNA export from nucleus	0.2	0.639607	dependent GO term
positive regulation of saliva secretion	0.545455	0.639607	independent GO term
macrophage chemotaxis	0.909091	0.639607	independent GO term
positive regulation of receptor-mediated endocytosis	0.636364	0.639607	independent GO term
vesicle fusion with Golgi apparatus	0.545455	0.639607	independent GO term
positive regulation of isotype switching to IgG isotypes	0.75	0.639607	dependent GO term
positive regulation of retinoic acid receptor signaling pathway	0.612903	0.639607	independent GO term
3'-phosphoadenosine 5'-phosphosulfate metabolic process	0.5	0.639607	independent GO term
interleukin-1 beta secretion	0.666667	0.639607	independent GO term
negative regulation of dendrite morphogenesis	0.461538	0.639607	independent GO term
positive regulation of dendrite morphogenesis	0.444444	0.639607	independent GO term
activated T cell proliferation	0.655172	0.639607	independent GO term
positive regulation of antigen receptor-mediated signaling pathway	0.644444	0.639607	independent GO term
positive regulation of T cell receptor signaling pathway	0.625	0.639607	dependent GO term
negative regulation of negative chemotaxis	0	0.639607	independent GO term
barbed-end actin filament capping	0.615385	0.639607	independent GO term
DNA ligation involved in DNA repair	0.285714	0.639607	dependent GO term
RNA polymerase II transcriptional preinitiation complex assembly	0.333333	0.639607	independent GO term
cytoplasmic sequestering of protein	0.483871	0.639607	independent GO term
positive regulation of release of sequestered calcium ion into cytosol	0.727273	0.639607	independent GO term
maintenance of protein location in nucleus	0.466667	0.639607	independent GO term
histone H3-K9 methylation	0.388889	0.639607	dependent GO term
negative regulation of histone H3-K9 methylation	0.428571	0.639607	dependent GO term
positive regulation of focal adhesion assembly	0.7	0.639607	dependent GO term
positive regulation of fibrinolysis	0.8125	0.639607	independent GO term
positive regulation of telomerase activity	0.454545	0.639607	independent GO term
ventricular cardiac muscle cell development	0.538462	0.639607	independent GO term
phospholipid homeostasis	0.592593	0.639607	independent GO term
inner ear receptor cell differentiation	0.466667	0.639607	independent GO term
cellular process regulating host cell cycle in response to virus	0.583333	0.639607	independent GO term
lens induction in camera-type eye	0.928571	0.639607	independent GO term
cilium morphogenesis	0.4	0.639607	independent GO term
positive regulation of type I interferon-mediated signaling pathway	0.444444	0.639607	dependent GO term
positive regulation of cardiac muscle contraction	0.75	0.639607	independent GO term
Clara cell differentiation	0.666667	0.639607	independent GO term
Type II pneumocyte differentiation	0.75	0.639607	independent GO term
prostatic bud formation	0.764706	0.639607	independent GO term
positive regulation of necroptotic process	0.5	0.639607	independent GO term
positive regulation of vitamin D biosynthetic process	1	0.639607	independent GO term
regulation of calcidiol 1-monooxygenase activity	0.666667	0.639607	independent GO term
positive regulation of calcidiol 1-monooxygenase activity	0.8125	0.639607	dependent GO term
apoptotic process involved in morphogenesis	0.5	0.639607	independent GO term
negative regulation of mitotic anaphase-promoting complex activity	0	0.639607	dependent GO term
branch elongation involved in salivary gland morphogenesis	0.2	0.639607	independent GO term
mammary gland branching involved in pregnancy	0.657895	0.639607	independent GO term
positive regulation of mast cell chemotaxis	0.666667	0.639607	independent GO term
negative regulation of androgen receptor signaling pathway	0.5	0.639607	dependent GO term
mesenchymal cell differentiation involved in lung development	0.2	0.639607	independent GO term
positive regulation of myeloid leukocyte cytokine production involved in immune response	0.823529	0.639607	independent GO term
positive regulation of dermatome development	0	0.639607	independent GO term
BMP signaling pathway involved in heart development	0.52381	0.639607	independent GO term
apoptotic process involved in luteolysis	0	0.639607	independent GO term
negative regulation of transcription from RNA polymerase II promoter in response to hypoxia	0.5	0.639607	independent GO term
negative regulation of mucus secretion	0.9	0.639607	independent GO term
negative regulation of ERK1 and ERK2 cascade	0.769231	0.639607	independent GO term
chaperone cofactor-dependent protein refolding	0.666667	0.639607	dependent GO term
regulation of centromeric sister chromatid cohesion	0.647059	0.639607	independent GO term
histone H3-K27 methylation	0.235294	0.639607	dependent GO term
caveola assembly	0.875	0.639607	independent GO term
histone H3 deacetylation	0.619048	0.639607	dependent GO term
CUT catabolic process	0	0.639607	independent GO term
cellular response to prostaglandin E stimulus	0.583333	0.639607	dependent GO term
transcriptional activation by promoter-enhancer looping	0.5	0.639607	independent GO term
positive regulation of fever generation by positive regulation of prostaglandin secretion	1	0.639607	dependent GO term
TNFSF11-mediated signaling pathway	1	0.639607	independent GO term
mitotic cell cycle arrest	0.473684	0.639607	independent GO term
cellular response to catecholamine stimulus	0.657143	0.639607	independent GO term
negative regulation of transcription involved in G1/S transition of mitotic cell cycle	0.40625	0.639607	independent GO term
glomerular visceral epithelial cell development	0.692308	0.639607	independent GO term
mesonephric tubule development	0.380952	0.639607	independent GO term
minus-end-directed organelle transport along microtubule	0	0.639607	dependent GO term
negative regulation of establishment of protein localization to plasma membrane	0.608696	0.639607	independent GO term
regulation of monocyte chemotaxis	0.74	0.639607	independent GO term
positive regulation of monocyte chemotaxis	0.733333	0.639607	dependent GO term
positive regulation of deacetylase activity	0.714286	0.639607	independent GO term
negative regulation of cell migration involved in sprouting angiogenesis	0.818182	0.639607	independent GO term
positive regulation of synapse maturation	0.269231	0.639607	independent GO term
regulation of arachidonic acid secretion	0.642857	0.639607	dependent GO term
positive regulation of arachidonic acid secretion	1	0.639607	dependent GO term
positive regulation of protein targeting to membrane	0.772727	0.639607	independent GO term
mature dendritic cell differentiation	0.5	0.639607	independent GO term
alpha-amino-3-hydroxy-5-methyl-4-isoxazole propionate selective glutamate receptor clustering	0.333333	0.639607	independent GO term
N-methyl-D-aspartate receptor clustering	0.444444	0.639607	independent GO term
positive regulation of cytokine production involved in inflammatory response	0.5	0.639607	independent GO term
negative regulation of protein homotetramerization	0.5	0.639607	dependent GO term
positive regulation of ERBB signaling pathway	0.574468	0.639607	independent GO term
negative regulation of hydrogen peroxide-mediated programmed cell death	1	0.639607	independent GO term
positive regulation of protein ubiquitination involved in ubiquitin-dependent protein catabolic process	0.564103	0.639607	independent GO term
positive regulation of receptor activity	0.659574	0.639607	independent GO term
regulation of DNA biosynthetic process	0.566038	0.639607	independent GO term
positive regulation of chemokine (C-X-C motif) ligand 2 production	0.777778	0.639607	independent GO term
positive regulation of gastrulation	0.625	0.639607	independent GO term
positive regulation of DNA biosynthetic process	0.789474	0.639607	dependent GO term
positive regulation of metanephric mesenchymal cell migration	0.923077	0.639607	independent GO term
positive regulation of mesenchymal stem cell differentiation	0.5	0.639607	independent GO term
regulation of double-strand break repair	0.590909	0.639607	independent GO term
regulation of glucose import in response to insulin stimulus	0.8	0.639607	independent GO term
positive regulation of glucose import in response to insulin stimulus	0.809524	0.639607	dependent GO term
insulin-like growth factor receptor signaling pathway	0.638889	0.597162	independent GO term
protein methylation	0.362637	0.584895	independent GO term
GPI anchor biosynthetic process	0	0.557475	independent GO term
regulation of protein deacetylation	0.5	0.557475	independent GO term
regulation of glycogen biosynthetic process	0.633803	0.547847	dependent GO term
positive regulation of DNA replication	0.626582	0.547847	independent GO term
positive regulation of canonical Wnt signaling pathway	0.495238	0.547847	independent GO term
single strand break repair	0.666667	0.511523	independent GO term
establishment of mitotic spindle orientation	0.375	0.511523	dependent GO term
pro-B cell differentiation	0.421053	0.511523	independent GO term
protein ADP-ribosylation	0.608696	0.511523	independent GO term
Wnt signaling pathway, calcium modulating pathway	0	0.511523	dependent GO term
deoxyribonucleotide biosynthetic process	0.266667	0.511523	independent GO term
positive regulation of glycoprotein biosynthetic process	0.677419	0.511523	dependent GO term
negative regulation of glucose transport	0.763158	0.511523	independent GO term
mRNA modification	0	0.511523	independent GO term
negative regulation of axon extension	0.571429	0.511523	dependent GO term
negative regulation of B cell proliferation	0.568627	0.511523	dependent GO term
positive regulation of collagen biosynthetic process	0.625	0.511523	independent GO term
positive regulation of intracellular estrogen receptor signaling pathway	0.645161	0.511523	dependent GO term
somatic stem cell maintenance	0.578125	0.511523	independent GO term
negative regulation of histone acetylation	0.459459	0.511523	dependent GO term
peptidyl-tyrosine dephosphorylation	0.656716	0.511523	dependent GO term
sequestering of TGFbeta in extracellular matrix	0.625	0.511523	independent GO term
prolactin signaling pathway	0.894737	0.511523	independent GO term
histone H4-K16 acetylation	0.347826	0.511523	dependent GO term
positive regulation of chemokine biosynthetic process	0.8	0.511523	independent GO term
intermediate filament bundle assembly	0.5	0.511523	independent GO term
positive regulation of erythrocyte differentiation	0.617647	0.511523	independent GO term
positive regulation of glycolytic process	0.833333	0.511523	independent GO term
cGMP metabolic process	0.625	0.511523	independent GO term
positive regulation of follicle-stimulating hormone secretion	1	0.511523	independent GO term
negative regulation of axon extension involved in axon guidance	0.368421	0.511523	dependent GO term
defense response to Gram-negative bacterium	0.714286	0.511523	independent GO term
establishment of spindle orientation	0.357143	0.511523	independent GO term
positive regulation of cardioblast differentiation	0.875	0.511523	independent GO term
negative regulation of cell cycle arrest	0.461538	0.511523	independent GO term
cellular response to prostaglandin stimulus	0.684211	0.511523	independent GO term
planar cell polarity pathway involved in neural tube closure	0.333333	0.511523	dependent GO term
positive regulation of endoplasmic reticulum unfolded protein response	0.642857	0.511523	independent GO term
positive regulation of mitochondrial outer membrane permeabilization involved in apoptotic signaling pathway	0.708333	0.511523	independent GO term
negative regulation of peptidyl-lysine acetylation	0.5	0.511523	independent GO term
positive regulation of vascular endothelial growth factor receptor signaling pathway	0.793103	0.502587	independent GO term
SCF-dependent proteasomal ubiquitin-dependent protein catabolic process	0.578947	0.500737	independent GO term
organelle transport along microtubule	0.423077	0.500737	independent GO term
protein deacetylation	0.533333	0.499509	independent GO term
regulation of phosphatidylinositol 3-kinase activity	0.652174	0.499207	dependent GO term
protein dephosphorylation	0.55814	0.462052	independent GO term
preassembly of GPI anchor in ER membrane	0	0.43545	independent GO term
regulation of lipid kinase activity	0.589147	0.426146	independent GO term
negative regulation of cAMP metabolic process	0.666667	0.410342	dependent GO term
positive regulation of cell-matrix adhesion	0.627907	0.409086	independent GO term
DNA damage induced protein phosphorylation	0.52381	0.409086	independent GO term
intrinsic apoptotic signaling pathway in response to oxidative stress	0.652174	0.409086	independent GO term
positive regulation of pseudopodium assembly	0.45	0.409086	independent GO term
positive regulation of intracellular steroid hormone receptor signaling pathway	0.685714	0.409086	independent GO term
response to prostaglandin E	0.73913	0.409086	independent GO term
regulation of catenin import into nucleus	0.527473	0.409086	independent GO term
5S class rRNA transcription from RNA polymerase III type 1 promoter	0.272727	0.409086	dependent GO term
tRNA transcription from RNA polymerase III promoter	0.272727	0.409086	dependent GO term
regulation of mRNA splicing, via spliceosome	0.342105	0.409086	dependent GO term
positive regulation of membrane protein ectodomain proteolysis	0.842105	0.409086	dependent GO term
negative regulation of striated muscle cell differentiation	0.54386	0.409086	independent GO term
histone H4 deacetylation	0.5	0.409086	dependent GO term
cellular response to estrogen stimulus	0.557377	0.409086	independent GO term
positive regulation of protein insertion into mitochondrial membrane involved in apoptotic signaling pathway	0.566038	0.399208	independent GO term
negative regulation of cAMP biosynthetic process	0.642857	0.397071	dependent GO term
histone H3 acetylation	0.4	0.397071	independent GO term
tRNA aminoacylation for protein translation	0.272727	0.375044	independent GO term
growth hormone receptor signaling pathway	0.649123	0.375044	independent GO term
negative regulation of nucleotide metabolic process	0.632353	0.36927	independent GO term
regulation of glucose metabolic process	0.641221	0.368348	independent GO term
intrinsic apoptotic signaling pathway by p53 class mediator	0.504348	0.358829	independent GO term
androgen receptor signaling pathway	0.48	0.350372	independent GO term
positive regulation of stress-activated MAPK cascade	0.568182	0.330949	dependent GO term
negative regulation of endothelial cell proliferation	0.705882	0.32716	independent GO term
pyrimidine nucleobase catabolic process	0.454545	0.32716	dependent GO term
negative regulation of adenylate cyclase activity	0.658537	0.32716	dependent GO term
regulation of glycoprotein biosynthetic process	0.640625	0.32716	independent GO term
T cell homeostasis	0.761905	0.32716	independent GO term
leukocyte degranulation	0.634921	0.32716	dependent GO term
follicle-stimulating hormone secretion	0.5	0.32716	independent GO term
regulation of T cell receptor signaling pathway	0.623377	0.32716	independent GO term
negative regulation of B cell activation	0.561644	0.32716	independent GO term
histone H3-K4 methylation	0.428571	0.32716	dependent GO term
spliceosomal snRNP assembly	0.146341	0.321564	independent GO term
interleukin-1-mediated signaling pathway	0.647059	0.321366	independent GO term
base-excision repair	0.506849	0.310917	independent GO term
positive regulation of pathway-restricted SMAD protein phosphorylation	0.476744	0.310917	independent GO term
positive regulation of stress-activated protein kinase signaling cascade	0.609929	0.295463	independent GO term
double-strand break repair via nonhomologous end joining	0.357143	0.274144	independent GO term
visual learning	0.544444	0.274144	independent GO term
DNA methylation	0.354839	0.26164	independent GO term
regulation of androgen receptor signaling pathway	0.493333	0.26164	independent GO term
negative regulation of axonogenesis	0.524272	0.236024	independent GO term
negative regulation of myeloid leukocyte differentiation	0.780822	0.20924	independent GO term
pyrimidine nucleobase metabolic process	0.666667	0.20924	independent GO term
tRNA transcription	0.25	0.20924	independent GO term
protein import into peroxisome matrix	0.5	0.20924	dependent GO term
regulated secretory pathway	0.584416	0.20924	independent GO term
intrinsic apoptotic signaling pathway in response to DNA damage by p53 class mediator	0.489796	0.205888	dependent GO term
regulation of histone modification	0.528736	0.203323	independent GO term
fibrinolysis	0.78	0.203323	independent GO term
positive regulation of histone modification	0.542636	0.197251	dependent GO term
Wnt signaling pathway, planar cell polarity pathway	0.368421	0.167333	dependent GO term
ciliary neurotrophic factor-mediated signaling pathway	0.846154	0.167333	independent GO term
positive regulation of interleukin-1 secretion	0.84375	0.133819	independent GO term
Rho protein signal transduction	0.455446	0.0976545	independent GO term
extrinsic apoptotic signaling pathway via death domain receptors	0.658537	0.0924576	independent GO term
rRNA transcription	0.375	0.0855809	independent GO term
negative regulation of fibrinolysis	0.703704	0.0855809	dependent GO term
DNA damage response, signal transduction by p53 class mediator resulting in transcription of p21 class mediator	0.471698	0.0684388	dependent GO term
non-canonical Wnt signaling pathway	0.325581	0.0684388	independent GO term
protein targeting to peroxisome	0.470588	0.0349995	independent GO term

## Sheet: 1-month
GO terms	diseae enrichment ratio	Significance Strength (SS) score	GO term type
positive regulation of DNA damage response, signal transduction by p53 class mediator	0.28	1	independent GO term
positive regulation of glycogen biosynthetic process	0.679245	0.998573	dependent GO term
mRNA modification	0.333333	0.99785	independent GO term
positive regulation of cholesterol transport	0.703704	0.99785	independent GO term
very long-chain fatty acid catabolic process	0.25	0.99785	independent GO term
positive regulation of glucose metabolic process	0.6875	0.994871	independent GO term
regulation of fatty acid biosynthetic process	0.76087	0.992985	independent GO term
positive regulation of cytokinesis	0.395349	0.992231	independent GO term
regulation of catenin import into nucleus	0.506849	0.992231	independent GO term
regulation of glycogen biosynthetic process	0.597222	0.983952	independent GO term
spliceosomal tri-snRNP complex assembly	0	0.983338	independent GO term
regulation of blood volume by renin-angiotensin	0.5	0.983338	dependent GO term
ventricular cardiac muscle tissue development	0.666667	0.983338	independent GO term
negative regulation of Wnt signaling pathway involved in heart development	0.73913	0.983338	independent GO term
growth plate cartilage development	0.761905	0.983338	independent GO term
isocitrate metabolic process	0	0.983338	independent GO term
transcription from mitochondrial promoter	0	0.983338	independent GO term
transcription initiation from mitochondrial promoter	0	0.983338	independent GO term
phosphatidic acid biosynthetic process	0.88	0.983338	dependent GO term
platelet activating factor biosynthetic process	1	0.983338	dependent GO term
Mo-molybdopterin cofactor biosynthetic process	0.363636	0.983338	independent GO term
post-chaperonin tubulin folding pathway	0	0.983338	independent GO term
G-protein coupled receptor signaling pathway coupled to cGMP nucleotide second messenger	0.571429	0.983338	independent GO term
cyclin catabolic process	0.272727	0.983338	independent GO term
auditory receptor cell fate commitment	0.833333	0.983338	independent GO term
regulation of centrosome duplication	0.322581	0.983338	independent GO term
negative regulation of macrophage cytokine production	0.76	0.983338	independent GO term
ATP synthesis coupled proton transport	0.333333	0.983338	independent GO term
cytidine to uridine editing	0.333333	0.983338	independent GO term
targeting of mRNA for destruction involved in RNA interference	0	0.983338	independent GO term
pre-miRNA processing	0	0.983338	independent GO term
positive regulation of synaptic transmission, cholinergic	1	0.983338	independent GO term
positive regulation of prostaglandin secretion	0.764706	0.983338	independent GO term
histone H2B ubiquitination	0.636364	0.983338	independent GO term
cargo loading into vesicle	0	0.983338	independent GO term
purinergic nucleotide receptor signaling pathway	0	0.983338	independent GO term
phosphatidylglycerol acyl-chain remodeling	0.833333	0.983338	independent GO term
phosphatidylinositol acyl-chain remodeling	0.833333	0.983338	independent GO term
phosphatidylserine acyl-chain remodeling	0.833333	0.983338	independent GO term
phosphatidylcholine acyl-chain remodeling	0.833333	0.983338	independent GO term
phosphatidylethanolamine acyl-chain remodeling	0.833333	0.983338	independent GO term
vascular endothelial growth factor signaling pathway	0.793103	0.983338	independent GO term
oncostatin-M-mediated signaling pathway	0.75	0.983338	independent GO term
detection of triacyl bacterial lipopeptide	1	0.983338	independent GO term
detection of diacyl bacterial lipopeptide	1	0.983338	independent GO term
negative regulation of B cell differentiation	0.533333	0.983338	independent GO term
regulation of auditory receptor cell differentiation	0.2	0.983338	independent GO term
negative regulation of macrophage differentiation	0.8	0.983338	dependent GO term
negative regulation of mitotic recombination	0.4	0.983338	independent GO term
platelet activating factor metabolic process	0.8	0.983338	independent GO term
phosphatidic acid metabolic process	0.88	0.983338	independent GO term
positive regulation of bone mineralization	0.666667	0.982644	independent GO term
RNA polyadenylation	0.333333	0.982445	independent GO term
organ induction	0.577778	0.969434	independent GO term
positive regulation of blood vessel endothelial cell migration	0.723077	0.968238	independent GO term
DNA replication initiation	0.230769	0.964842	independent GO term
SMAD protein import into nucleus	0.634146	0.954314	independent GO term
negative regulation of axon extension	0.4	0.954314	independent GO term
positive regulation of intracellular estrogen receptor signaling pathway	0.666667	0.954314	dependent GO term
sequestering of TGFbeta in extracellular matrix	0.818182	0.954314	independent GO term
prolactin signaling pathway	0.923077	0.954314	independent GO term
positive regulation of erythrocyte differentiation	0.603448	0.954314	independent GO term
positive regulation of pathway-restricted SMAD protein phosphorylation	0.54717	0.943229	independent GO term
DNA damage response, signal transduction by p53 class mediator resulting in transcription of p21 class mediator	0.4	0.941614	independent GO term
activation of MAPKK activity	0.542484	0.936822	independent GO term
positive regulation of phosphatidylinositol 3-kinase activity	0.772152	0.927587	dependent GO term
activation of NF-kappaB-inducing kinase activity	0.666667	0.924007	independent GO term
vascular smooth muscle contraction	0.777778	0.916396	independent GO term
positive regulation of intracellular steroid hormone receptor signaling pathway	0.607143	0.916396	independent GO term
regulation of translation in response to stress	0.541667	0.916396	independent GO term
negative regulation of BMP signaling pathway	0.637931	0.900764	independent GO term
angiotensin maturation	0.826087	0.872364	independent GO term
mitotic nuclear envelope reassembly	0.466667	0.872364	independent GO term
mitotic G1 DNA damage checkpoint	0.391304	0.872364	independent GO term
transferrin transport	0.487805	0.872364	independent GO term
interleukin-4-mediated signaling pathway	0.833333	0.872364	independent GO term
regulation of systemic arterial blood pressure by renin-angiotensin	0.631579	0.824426	independent GO term
nitric oxide mediated signal transduction	0.794118	0.824426	independent GO term
negative regulation of blood vessel endothelial cell migration	0.72549	0.824426	independent GO term
protein import into peroxisome matrix	0.5	0.774326	independent GO term
autophagic vacuole fusion	0.529412	0.758474	independent GO term
activation of MAPKKK activity	0.458333	0.758474	independent GO term
inactivation of MAPK activity	0.447761	0.758474	independent GO term
DNA double-strand break processing	0.416667	0.758474	independent GO term
DNA strand renaturation	0.454545	0.758474	independent GO term
acetylcholine catabolic process in synaptic cleft	0.5	0.758474	independent GO term
histamine secretion	0.75	0.758474	independent GO term
norepinephrine-epinephrine vasoconstriction involved in regulation of systemic arterial blood pressure	0.571429	0.758474	independent GO term
positive regulation of heart rate by epinephrine-norepinephrine	0.692308	0.758474	independent GO term
positive regulation of the force of heart contraction by epinephrine-norepinephrine	0.75	0.758474	dependent GO term
vasodilation by norepinephrine-epinephrine involved in regulation of systemic arterial blood pressure	0.75	0.758474	independent GO term
desensitization of G-protein coupled receptor protein signaling pathway	0.645161	0.758474	independent GO term
desensitization of G-protein coupled receptor protein signaling pathway by arrestin	0.65	0.758474	dependent GO term
regulation of blood vessel size by renin-angiotensin	0.909091	0.758474	dependent GO term
positive regulation of neuroblast proliferation	0.558824	0.758474	independent GO term
mast cell chemotaxis	0.928571	0.758474	independent GO term
serotonin secretion by platelet	0.75	0.758474	independent GO term
regulation of germinal center formation	0.631579	0.758474	independent GO term
positive regulation of acute inflammatory response to antigenic stimulus	0.636364	0.758474	independent GO term
renal sodium ion transport	1	0.758474	independent GO term
regulation of systemic arterial blood pressure by endothelin	0.833333	0.758474	independent GO term
negative regulation of glomerular filtration	0.666667	0.758474	independent GO term
regulation of glycogen catabolic process	0.62963	0.758474	independent GO term
acetyl-CoA biosynthetic process from pyruvate	0	0.758474	independent GO term
purine ribonucleoside salvage	0	0.758474	independent GO term
DNA replication, synthesis of RNA primer	0	0.758474	independent GO term
DNA replication-dependent nucleosome assembly	0	0.758474	independent GO term
regulation of transcription from RNA polymerase III promoter	0.565217	0.758474	independent GO term
transcription initiation from RNA polymerase III promoter	0	0.758474	independent GO term
arginine catabolic process	0.733333	0.758474	dependent GO term
glutamate catabolic process	1	0.758474	dependent GO term
thyroid hormone generation	0.5	0.758474	independent GO term
sphingomyelin biosynthetic process	0	0.758474	independent GO term
leukotriene metabolic process	0.697674	0.758474	independent GO term
cholesterol catabolic process	1	0.758474	independent GO term
tubulin complex assembly	0.444444	0.758474	independent GO term
mitotic G2 DNA damage checkpoint	0.461538	0.758474	independent GO term
common-partner SMAD protein phosphorylation	0.676471	0.758474	independent GO term
phospholipase C-activating G-protein coupled glutamate receptor signaling pathway	0.5	0.758474	independent GO term
JUN phosphorylation	0.769231	0.758474	independent GO term
STAT protein import into nucleus	0.631579	0.758474	independent GO term
dosage compensation	0.35	0.758474	independent GO term
negative regulation of female receptivity	0.5	0.758474	independent GO term
retrograde axon cargo transport	0.4	0.758474	independent GO term
sulfate transport	0.5	0.758474	independent GO term
hormone-mediated apoptotic signaling pathway	0.714286	0.758474	independent GO term
branched-chain amino acid catabolic process	0	0.758474	dependent GO term
snRNA transcription	0	0.758474	independent GO term
gamma-aminobutyric acid metabolic process	0.777778	0.758474	independent GO term
negative regulation of cell fate specification	0.6	0.758474	independent GO term
proteasomal ubiquitin-independent protein catabolic process	1	0.758474	independent GO term
positive regulation of platelet-derived growth factor receptor signaling pathway	0.5	0.758474	independent GO term
regulation of definitive erythrocyte differentiation	0.5	0.758474	independent GO term
negative regulation of plasma membrane long-chain fatty acid transport	0.72	0.758474	dependent GO term
regulation of fibroblast migration	0.7	0.758474	independent GO term
positive regulation of fibroblast migration	0.586207	0.758474	dependent GO term
negative regulation of keratinocyte proliferation	0.736842	0.758474	independent GO term
positive regulation of receptor biosynthetic process	0.589744	0.758474	independent GO term
negative regulation of receptor biosynthetic process	0.608696	0.758474	independent GO term
positive regulation of heparan sulfate proteoglycan biosynthetic process	0.8	0.758474	independent GO term
positive regulation of phosphatase activity	0.69697	0.758474	independent GO term
neural crest cell differentiation	0.521739	0.758474	independent GO term
positive regulation of glutamate secretion	1	0.758474	independent GO term
tonic smooth muscle contraction	0.84	0.758474	independent GO term
cardiac muscle hypertrophy in response to stress	0.5	0.758474	dependent GO term
heparan sulfate proteoglycan biosynthetic process	1	0.758474	independent GO term
heparan sulfate proteoglycan biosynthetic process, polysaccharide chain biosynthetic process	1	0.758474	independent GO term
L-glutamate transport	0.625	0.758474	independent GO term
plasma membrane long-chain fatty acid transport	0.791667	0.758474	independent GO term
ATP hydrolysis coupled proton transport	0.535714	0.758474	independent GO term
protein import into peroxisome matrix, docking	0.5	0.758474	independent GO term
histone phosphorylation	0.518519	0.758474	independent GO term
nucleosome positioning	0.466667	0.758474	independent GO term
keratan sulfate biosynthetic process	0.769231	0.758474	independent GO term
peptidyl-arginine methylation	0.5	0.758474	independent GO term
dolichol metabolic process	0.5	0.758474	independent GO term
leukotriene biosynthetic process	0.633333	0.758474	dependent GO term
lipoxygenase pathway	0.666667	0.758474	independent GO term
GDP-mannose metabolic process	0.5	0.758474	independent GO term
peptide cross-linking via chondroitin 4-sulfate glycosaminoglycan	0.846154	0.758474	dependent GO term
L-ascorbic acid metabolic process	0.5	0.758474	independent GO term
visceral motor neuron differentiation	0.666667	0.758474	independent GO term
cerebral cortex radially oriented cell migration	0.451613	0.758474	independent GO term
Wnt signaling pathway involved in forebrain neuroblast division	0.5	0.758474	independent GO term
convergent extension involved in neural plate elongation	0.333333	0.758474	independent GO term
hyaluronan catabolic process	0.588235	0.758474	independent GO term
intestinal cholesterol absorption	1	0.758474	independent GO term
primary miRNA processing	0.692308	0.758474	independent GO term
replication fork processing	0.6	0.758474	independent GO term
positive regulation of cyclin-dependent protein serine/threonine kinase activity involved in G1/S transition of mitotic cell cycle	0.565217	0.758474	independent GO term
positive regulation of lipopolysaccharide-mediated signaling pathway	0.857143	0.758474	independent GO term
protection from non-homologous end joining at telomere	0.5	0.758474	independent GO term
positive regulation of synaptic plasticity	0.181818	0.758474	independent GO term
positive regulation of fatty acid beta-oxidation	0.535714	0.758474	dependent GO term
peripheral nervous system myelin maintenance	0.551724	0.758474	independent GO term
regulation of ARF GTPase activity	0.366667	0.758474	independent GO term
negative regulation of chondrocyte differentiation	0.727273	0.758474	independent GO term
positive regulation of phosphoprotein phosphatase activity	0.862069	0.758474	dependent GO term
negative regulation of DNA-templated transcription, elongation	0.4	0.758474	independent GO term
negative regulation of epinephrine secretion	0.615385	0.758474	independent GO term
negative regulation of DNA endoreduplication	0.384615	0.758474	independent GO term
negative regulation of viral transcription	0.5	0.758474	independent GO term
negative regulation of collagen biosynthetic process	0.666667	0.758474	independent GO term
regulation of myeloid cell apoptotic process	0.6	0.758474	independent GO term
positive regulation of protein import into nucleus, translocation	0.625	0.758474	dependent GO term
response to vitamin D	0.551724	0.758474	independent GO term
fatty acid beta-oxidation using acyl-CoA oxidase	0.4	0.758474	independent GO term
positive regulation of NAD(P)H oxidase activity	1	0.758474	independent GO term
CENP-A containing nucleosome assembly at centromere	0.5	0.758474	dependent GO term
negative regulation of heterotypic cell-cell adhesion	0.882353	0.758474	independent GO term
negative regulation of protein dephosphorylation	0.5	0.758474	independent GO term
mitochondrial protein catabolic process	0.5	0.758474	independent GO term
endothelial cell chemotaxis	0.793103	0.758474	independent GO term
phosphatidylinositol-3-phosphate biosynthetic process	0.708333	0.758474	independent GO term
alpha-linolenic acid metabolic process	0	0.758474	independent GO term
opioid receptor signaling pathway	0.5	0.758474	independent GO term
interleukin-5-mediated signaling pathway	0.75	0.758474	independent GO term
interleukin-7-mediated signaling pathway	1	0.758474	independent GO term
interleukin-3-mediated signaling pathway	0.75	0.758474	independent GO term
erythropoietin-mediated signaling pathway	0.777778	0.758474	independent GO term
MDA-5 signaling pathway	0.785714	0.758474	independent GO term
negative regulation of circadian sleep/wake cycle, sleep	0.666667	0.758474	independent GO term
negative regulation of circadian sleep/wake cycle, non-REM sleep	1	0.758474	dependent GO term
keratan sulfate catabolic process	0.733333	0.758474	independent GO term
negative regulation of tyrosine phosphorylation of Stat3 protein	0.545455	0.758474	dependent GO term
glucocorticoid receptor signaling pathway	0.52381	0.758474	independent GO term
myeloid dendritic cell differentiation	0.722222	0.758474	independent GO term
natural killer cell degranulation	0	0.758474	independent GO term
histone exchange	0.4	0.758474	dependent GO term
maintenance of DNA repeat elements	0.5	0.758474	independent GO term
negative regulation by host of viral transcription	0.5	0.758474	dependent GO term
Wnt signaling pathway involved in dorsal/ventral axis specification	0.818182	0.758474	independent GO term
canonical Wnt signaling pathway involved in positive regulation of epithelial to mesenchymal transition	0.8	0.758474	independent GO term
regulation of interleukin-6 biosynthetic process	0.777778	0.758474	independent GO term
negative regulation of interleukin-6 biosynthetic process	0.75	0.758474	dependent GO term
positive regulation of interleukin-6 biosynthetic process	0.833333	0.758474	dependent GO term
regulation of keratinocyte differentiation	0.714286	0.758474	independent GO term
positive regulation of keratinocyte differentiation	0.625	0.758474	dependent GO term
negative regulation of T-helper 1 cell differentiation	0.666667	0.758474	independent GO term
positive regulation of T-helper 2 cell differentiation	0.833333	0.758474	independent GO term
low-density lipoprotein particle receptor biosynthetic process	0.866667	0.758474	independent GO term
negative regulation of low-density lipoprotein particle receptor biosynthetic process	0.777778	0.758474	dependent GO term
positive regulation of fatty acid biosynthetic process	0.777778	0.758474	dependent GO term
positive regulation of epidermal growth factor-activated receptor activity	0.65	0.758474	dependent GO term
positive regulation of epidermal growth factor receptor signaling pathway	0.55	0.758474	independent GO term
negative regulation of Notch signaling pathway	0.488372	0.758474	independent GO term
negative regulation of fatty acid metabolic process	0.827586	0.758474	independent GO term
positive regulation of circadian sleep/wake cycle, REM sleep	1	0.758474	independent GO term
negative regulation of JAK-STAT cascade	0.489362	0.758474	independent GO term
histone deacetylation	0.538462	0.73285	dependent GO term
macrophage differentiation	0.75	0.723419	independent GO term
regulation of activin receptor signaling pathway	0.59375	0.723419	independent GO term
sarcomere organization	0.717391	0.723419	independent GO term
regulation of phosphatidylinositol 3-kinase activity	0.77381	0.709297	independent GO term
peptide cross-linking	0.684211	0.69557	independent GO term
histone H3 acetylation	0.372881	0.69557	independent GO term
chromatin silencing at rDNA	0.705882	0.660554	independent GO term
meiotic mismatch repair	0.5	0.660554	dependent GO term
positive regulation of cytokine-mediated signaling pathway	0.736842	0.660554	independent GO term
pro-B cell differentiation	0.59375	0.660554	independent GO term
regulation of the force of heart contraction by chemical signal	0.653846	0.660554	independent GO term
ventricular trabecula myocardium morphogenesis	0.461538	0.660554	independent GO term
cardiac muscle hypertrophy	0.536585	0.660554	independent GO term
citrate metabolic process	0.857143	0.660554	independent GO term
carnitine shuttle	1	0.660554	independent GO term
Wnt signaling pathway, calcium modulating pathway	0	0.660554	dependent GO term
myotube cell development	0.527273	0.660554	independent GO term
granulocyte differentiation	0.619048	0.660554	independent GO term
positive regulation of TOR signaling	0.625	0.660554	independent GO term
regulation of protein import into nucleus, translocation	0.679245	0.660554	independent GO term
somatic stem cell maintenance	0.492958	0.660554	independent GO term
negative regulation of histone acetylation	0.4	0.660554	independent GO term
protein mannosylation	0.5	0.660554	independent GO term
protein O-linked mannosylation	0.5	0.660554	dependent GO term
maternal behavior	0.5	0.660554	independent GO term
intermediate filament bundle assembly	0.375	0.660554	independent GO term
transcription from RNA polymerase I promoter	0.44898	0.655784	independent GO term
protein deacetylation	0.510204	0.655007	independent GO term
signal complex assembly	0.377778	0.623103	independent GO term
activin receptor signaling pathway	0.534884	0.620815	independent GO term
DNA synthesis involved in DNA repair	0.409091	0.575274	independent GO term
positive regulation of cell-matrix adhesion	0.611765	0.575274	independent GO term
copper ion transport	1	0.575274	independent GO term
DNA damage induced protein phosphorylation	0.636364	0.575274	independent GO term
transmembrane receptor protein tyrosine phosphatase signaling pathway	0.454545	0.575274	independent GO term
intrinsic apoptotic signaling pathway in response to oxidative stress	0.823529	0.575274	independent GO term
attachment of GPI anchor to protein	0.5	0.575274	independent GO term
positive regulation of natural killer cell differentiation	0.857143	0.575274	independent GO term
positive regulation of activin receptor signaling pathway	0.619048	0.575274	dependent GO term
substrate adhesion-dependent cell spreading	0.656716	0.575274	independent GO term
interleukin-2-mediated signaling pathway	0.909091	0.575274	independent GO term
ATP-dependent chromatin remodeling	0.45	0.575274	independent GO term
isotype switching	0.470588	0.575274	independent GO term
positive regulation of fatty acid oxidation	0.631579	0.575274	independent GO term
positive regulation of translation	0.46	0.575061	independent GO term
positive regulation of glucose import	0.73913	0.512841	independent GO term
negative regulation of endothelial cell proliferation	0.652174	0.501001	independent GO term
pyrimidine nucleobase catabolic process	0.5	0.501001	dependent GO term
triglyceride catabolic process	0.589744	0.501001	independent GO term
SMAD protein complex assembly	0.6	0.485308	independent GO term
SCF-dependent proteasomal ubiquitin-dependent protein catabolic process	0.185185	0.485308	independent GO term
transcription initiation from RNA polymerase I promoter	0.44898	0.474341	independent GO term
transcription elongation from RNA polymerase I promoter	0.37931	0.446173	independent GO term
oxaloacetate metabolic process	0.909091	0.436316	independent GO term
positive regulation of mast cell degranulation	0.705882	0.436316	dependent GO term
positive regulation of interleukin-2 biosynthetic process	0.771429	0.436316	independent GO term
termination of RNA polymerase I transcription	0.393939	0.414848	independent GO term
pyrimidine nucleobase metabolic process	0.45	0.379981	independent GO term
positive regulation of mast cell activation	0.652174	0.379981	independent GO term
cellular amino acid catabolic process	0.666667	0.330919	independent GO term
myotube differentiation	0.559322	0.330919	independent GO term
positive regulation of vascular endothelial growth factor receptor signaling pathway	0.698113	0.330919	independent GO term
protein refolding	0.717949	0.330919	independent GO term
mismatch repair	0.46875	0.249738	independent GO term
GPI anchor biosynthetic process	0.5	0.190344	dependent GO term
non-canonical Wnt signaling pathway	0.447368	0.190344	independent GO term
C-terminal protein lipidation	0.285714	0.109479	dependent GO term
regulation of acetyl-CoA biosynthetic process from pyruvate	0	0.109479	independent GO term
protein lipidation	0.477273	0.0830264	independent GO term

## Sheet: 4-month
GO terms	diseae enrichment ratio	Significance Strength (SS) score	GO term type
detection of diacyl bacterial lipopeptide	0.888889	1	independent GO term
positive regulation of tumor necrosis factor biosynthetic process	0.782609	1	independent GO term
cellular response to bacterial lipopeptide	0.916667	1	independent GO term
negative regulation of ubiquitin-protein ligase activity	0.409091	0.999999	independent GO term
negative regulation of ubiquitin-protein ligase activity involved in mitotic cell cycle	0.38961	0.999997	dependent GO term
interleukin-4-mediated signaling pathway	1	0.999992	independent GO term
Notch signaling involved in heart development	0.444444	0.99961	independent GO term
regulation of platelet aggregation	0.745098	0.99961	independent GO term
prolactin signaling pathway	0.714286	0.999118	independent GO term
signal complex assembly	0.568182	0.998651	independent GO term
negative regulation of fibrinolysis	0.842105	0.997722	dependent GO term
positive regulation of blood coagulation	0.769231	0.996224	independent GO term
regulation of T cell receptor signaling pathway	0.661538	0.992403	independent GO term
mRNA 3'-splice site recognition	0.153846	0.990804	independent GO term
leukocyte migration involved in inflammatory response	0.615385	0.990804	independent GO term
serotonin secretion by platelet	0.75	0.990804	independent GO term
GDP-mannose biosynthetic process	0	0.990804	independent GO term
positive regulation of fibroblast migration	0.708333	0.990804	independent GO term
negative regulation of smooth muscle cell migration	0.818182	0.990804	dependent GO term
macroautophagy	0.777778	0.990804	independent GO term
spinal cord oligodendrocyte cell fate specification	0.5	0.990804	independent GO term
plasminogen activation	0.789474	0.990804	independent GO term
negative regulation of ATPase activity	1	0.990804	independent GO term
CENP-A containing nucleosome assembly at centromere	0.454545	0.990804	dependent GO term
interleukin-5-mediated signaling pathway	0.625	0.990804	independent GO term
detection of triacyl bacterial lipopeptide	0.888889	0.990804	independent GO term
histone exchange	0.375	0.990804	independent GO term
type I interferon biosynthetic process	0.8	0.990804	independent GO term
negative regulation of T-helper 1 cell differentiation	1	0.990804	dependent GO term
negative regulation of single stranded viral RNA replication via double stranded DNA intermediate	0.7	0.990804	independent GO term
pyrimidine nucleoside catabolic process	0.545455	0.990804	independent GO term
negative regulation of oligodendrocyte differentiation	0.625	0.990804	independent GO term
positive regulation of antigen receptor-mediated signaling pathway	0.72973	0.990804	independent GO term
positive regulation of T cell receptor signaling pathway	0.724138	0.990804	dependent GO term
cellular process regulating host cell cycle in response to virus	0.6	0.990804	independent GO term
DNA cytosine deamination	0	0.990804	dependent GO term
neutrophil aggregation	0.8	0.990804	independent GO term
cellular response to diacyl bacterial lipopeptide	0.857143	0.990804	dependent GO term
cellular response to triacyl bacterial lipopeptide	0.888889	0.990804	dependent GO term
positive regulation of cytokine production involved in inflammatory response	0.5	0.990804	independent GO term
positive regulation of protein ubiquitination involved in ubiquitin-dependent protein catabolic process	0.5625	0.990804	independent GO term
positive regulation of glucose import in response to insulin stimulus	0.714286	0.990804	independent GO term
spliceosomal complex assembly	0.263158	0.97705	independent GO term
ventricular trabecula myocardium morphogenesis	0.611111	0.974174	independent GO term
citrate metabolic process	1	0.974174	independent GO term
2-oxoglutarate metabolic process	1	0.974174	independent GO term
peptidyl-lysine modification to hypusine	0	0.974174	independent GO term
monocyte differentiation	0.647059	0.974174	independent GO term
peptidyl-tyrosine dephosphorylation	0.615385	0.974174	independent GO term
sequestering of TGFbeta in extracellular matrix	0.666667	0.974174	dependent GO term
hydrogen peroxide catabolic process	1	0.974174	independent GO term
very long-chain fatty acid catabolic process	0.333333	0.974174	independent GO term
histone H4-K16 acetylation	0.368421	0.974174	independent GO term
positive regulation of calcium ion-dependent exocytosis	0.5625	0.974174	independent GO term
negative regulation of alpha-beta T cell differentiation	0.714286	0.974174	independent GO term
Tie signaling pathway	0.666667	0.974174	independent GO term
extracellular negative regulation of signal transduction	0.666667	0.974174	independent GO term
regulation of alpha-amino-3-hydroxy-5-methyl-4-isoxazole propionate selective glutamate receptor activity	0.521739	0.974174	independent GO term
smooth muscle cell migration	0.75	0.952378	independent GO term
succinate metabolic process	1	0.951622	independent GO term
central nervous system neuron axonogenesis	0.534884	0.951622	independent GO term
regulation of natural killer cell mediated cytotoxicity	0.428571	0.951622	independent GO term
positive regulation of B cell differentiation	0.625	0.951622	independent GO term
ventricular cardiac muscle cell differentiation	0.769231	0.951622	independent GO term
regulation of N-methyl-D-aspartate selective glutamate receptor activity	0.5	0.951622	independent GO term
negative regulation of extrinsic apoptotic signaling pathway in absence of ligand	0.716981	0.951622	independent GO term
regulation of smooth muscle cell migration	0.733333	0.936701	independent GO term
negative regulation of platelet activation	0.733333	0.924434	independent GO term
DNA deamination	0.411765	0.924434	independent GO term
dendrite morphogenesis	0.642857	0.86037	independent GO term
interleukin-6-mediated signaling pathway	0.636364	0.86037	independent GO term
regulation of immunoglobulin secretion	0.535714	0.825206	independent GO term
spliceosomal tri-snRNP complex assembly	0.3	0.817378	independent GO term
acetylcholine catabolic process in synaptic cleft	0.5	0.817378	independent GO term
histamine secretion	0.586207	0.817378	independent GO term
norepinephrine-epinephrine vasoconstriction involved in regulation of systemic arterial blood pressure	1	0.817378	independent GO term
positive regulation of heart rate by epinephrine-norepinephrine	1	0.817378	dependent GO term
positive regulation of the force of heart contraction by epinephrine-norepinephrine	1	0.817378	dependent GO term
regulation of blood volume by renin-angiotensin	0.428571	0.817378	independent GO term
vasodilation by norepinephrine-epinephrine involved in regulation of systemic arterial blood pressure	1	0.817378	independent GO term
desensitization of G-protein coupled receptor protein signaling pathway	0.6	0.817378	independent GO term
desensitization of G-protein coupled receptor protein signaling pathway by arrestin	0.416667	0.817378	dependent GO term
regulation of blood vessel size by renin-angiotensin	0.5	0.817378	independent GO term
myeloid dendritic cell chemotaxis	0.5	0.817378	independent GO term
regulation of germinal center formation	0.642857	0.817378	independent GO term
positive regulation of T cell tolerance induction	0.8	0.817378	independent GO term
immune response-inhibiting cell surface receptor signaling pathway	0.615385	0.817378	independent GO term
regulation of systemic arterial blood pressure by endothelin	0.7	0.817378	independent GO term
negative regulation of glomerular filtration	0.6	0.817378	independent GO term
regulation of glycogen catabolic process	0.666667	0.817378	independent GO term
acetyl-CoA biosynthetic process from pyruvate	1	0.817378	dependent GO term
regulation of gluconeogenesis	0.512821	0.817378	independent GO term
purine nucleobase metabolic process	0.5625	0.817378	independent GO term
DNA topological change	0.392857	0.817378	independent GO term
DNA replication, synthesis of RNA primer	0.5	0.817378	independent GO term
transcription initiation from RNA polymerase III promoter	0	0.817378	independent GO term
arginine catabolic process	0.6	0.817378	independent GO term
glutamate catabolic process	0.5	0.817378	independent GO term
polyamine biosynthetic process	0.25	0.817378	independent GO term
phosphatidic acid biosynthetic process	0.8	0.817378	dependent GO term
platelet activating factor biosynthetic process	0.5	0.817378	dependent GO term
sphingosine metabolic process	1	0.817378	independent GO term
Mo-molybdopterin cofactor biosynthetic process	0.5	0.817378	independent GO term
negative regulation of transcription from RNA polymerase II promoter during mitosis	0.428571	0.817378	independent GO term
mitotic G2 DNA damage checkpoint	0.466667	0.817378	independent GO term
activation of transmembrane receptor protein tyrosine kinase activity	0.722222	0.817378	independent GO term
common-partner SMAD protein phosphorylation	0.571429	0.817378	independent GO term
G-protein coupled receptor signaling pathway coupled to cGMP nucleotide second messenger	0.4	0.817378	independent GO term
phospholipase C-activating G-protein coupled glutamate receptor signaling pathway	0	0.817378	independent GO term
phospholipase C-activating G-protein coupled acetylcholine receptor signaling pathway	0.75	0.817378	independent GO term
JUN phosphorylation	0.428571	0.817378	independent GO term
STAT protein import into nucleus	0.777778	0.817378	independent GO term
negative regulation of female receptivity	1	0.817378	independent GO term
cyclin catabolic process	0.3	0.817378	independent GO term
attachment of spindle microtubules to kinetochore	0.529412	0.817378	independent GO term
hormone-mediated apoptotic signaling pathway	1	0.817378	independent GO term
auditory receptor cell fate commitment	0.5	0.817378	independent GO term
negative regulation of cell fate specification	0.684211	0.817378	independent GO term
positive regulation of heart rate	0.789474	0.817378	independent GO term
proteasomal ubiquitin-independent protein catabolic process	0.5	0.817378	independent GO term
negative regulation of autophagy	0.65	0.817378	independent GO term
negative regulation of striated muscle cell apoptotic process	0.434783	0.817378	independent GO term
regulation of definitive erythrocyte differentiation	0.5	0.817378	independent GO term
regulation of protein kinase A signaling	0.647059	0.817378	independent GO term
negative regulation of plasma membrane long-chain fatty acid transport	0.714286	0.817378	dependent GO term
positive regulation of heparan sulfate proteoglycan biosynthetic process	1	0.817378	independent GO term
positive regulation of phosphatase activity	0.714286	0.817378	independent GO term
negative regulation of macrophage cytokine production	0.8	0.817378	independent GO term
regulation of glutamate secretion	0.8	0.817378	independent GO term
positive regulation of glutamate secretion	0.5	0.817378	dependent GO term
regulation of norepinephrine secretion	0.666667	0.817378	independent GO term
negative regulation of phosphatidylinositol 3-kinase signaling	0.615385	0.817378	independent GO term
positive regulation of smooth muscle cell migration	0.6875	0.817378	dependent GO term
plasma membrane long-chain fatty acid transport	0.72	0.817378	independent GO term
telomere capping	0	0.817378	independent GO term
cytidine to uridine editing	0	0.817378	independent GO term
protein import into peroxisome matrix, translocation	0.5	0.817378	independent GO term
keratan sulfate biosynthetic process	1	0.817378	independent GO term
L-methionine salvage from methylthioadenosine	0.333333	0.817378	independent GO term
peptide cross-linking via chondroitin 4-sulfate glycosaminoglycan	0.727273	0.817378	independent GO term
L-ascorbic acid metabolic process	0.875	0.817378	independent GO term
cGMP-mediated signaling	0.73913	0.817378	independent GO term
visceral motor neuron differentiation	0.5	0.817378	independent GO term
Wnt signaling pathway involved in forebrain neuroblast division	0.333333	0.817378	independent GO term
convergent extension involved in neural plate elongation	0.5	0.817378	independent GO term
proteoglycan biosynthetic process	0.944444	0.817378	independent GO term
intestinal cholesterol absorption	0.5	0.817378	independent GO term
targeting of mRNA for destruction involved in RNA interference	0	0.817378	independent GO term
regulation of granulocyte differentiation	0.470588	0.817378	independent GO term
positive regulation of granulocyte differentiation	0.291667	0.817378	dependent GO term
primary miRNA processing	0.611111	0.817378	independent GO term
pre-miRNA processing	0	0.817378	independent GO term
replication fork processing	0.428571	0.817378	independent GO term
positive regulation of cyclin-dependent protein serine/threonine kinase activity involved in G1/S transition of mitotic cell cycle	0.527778	0.817378	independent GO term
positive regulation of lipopolysaccharide-mediated signaling pathway	0.769231	0.817378	independent GO term
protection from non-homologous end joining at telomere	0	0.817378	independent GO term
positive regulation of synaptic plasticity	0.5	0.817378	independent GO term
negative regulation of appetite	1	0.817378	independent GO term
positive regulation of synaptic transmission, GABAergic	0.666667	0.817378	independent GO term
positive regulation of prostaglandin secretion	0.846154	0.817378	dependent GO term
regulation of phospholipase A2 activity	0.6875	0.817378	independent GO term
negative regulation of protein oligomerization	0.612903	0.817378	independent GO term
negative regulation of protein homooligomerization	0.56	0.817378	dependent GO term
positive regulation of phosphoprotein phosphatase activity	0.789474	0.817378	dependent GO term
negative regulation of DNA-templated transcription, elongation	0.363636	0.817378	independent GO term
negative regulation of collagen biosynthetic process	0.363636	0.817378	independent GO term
positive regulation of protein import into nucleus, translocation	0.717391	0.817378	independent GO term
histone H2B ubiquitination	0	0.817378	independent GO term
positive regulation of catecholamine secretion	0.714286	0.817378	independent GO term
negative regulation of heterotypic cell-cell adhesion	0.875	0.817378	independent GO term
microtubule anchoring at centrosome	0.375	0.817378	independent GO term
negative regulation of protein dephosphorylation	0.565217	0.817378	independent GO term
cargo loading into vesicle	0	0.817378	independent GO term
purinergic nucleotide receptor signaling pathway	0	0.817378	independent GO term
endothelial cell chemotaxis	0.714286	0.817378	independent GO term
negative regulation of renal sodium excretion	1	0.817378	independent GO term
phosphatidylglycerol acyl-chain remodeling	0.75	0.817378	independent GO term
phosphatidylinositol acyl-chain remodeling	0.75	0.817378	independent GO term
phosphatidylserine acyl-chain remodeling	0.75	0.817378	independent GO term
phosphatidylcholine acyl-chain remodeling	0.75	0.817378	independent GO term
phosphatidylethanolamine acyl-chain remodeling	0.75	0.817378	independent GO term
opioid receptor signaling pathway	0.666667	0.817378	independent GO term
vascular endothelial growth factor signaling pathway	0.782609	0.817378	independent GO term
interleukin-7-mediated signaling pathway	0.888889	0.817378	independent GO term
interleukin-23-mediated signaling pathway	1	0.817378	independent GO term
interleukin-3-mediated signaling pathway	0.714286	0.817378	independent GO term
erythropoietin-mediated signaling pathway	0.6	0.817378	independent GO term
MDA-5 signaling pathway	0.533333	0.817378	independent GO term
interferon-gamma biosynthetic process	1	0.817378	independent GO term
heme catabolic process	1	0.817378	independent GO term
interleukin-6 biosynthetic process	0.666667	0.817378	independent GO term
negative regulation of circadian sleep/wake cycle, non-REM sleep	1	0.817378	dependent GO term
positive regulation of odontogenesis	0.5	0.817378	independent GO term
negative regulation of tumor necrosis factor biosynthetic process	0.666667	0.817378	independent GO term
mRNA transcription from RNA polymerase II promoter	0.55	0.817378	independent GO term
glucocorticoid receptor signaling pathway	0.583333	0.817378	independent GO term
regulation of amyloid precursor protein biosynthetic process	0.5	0.817378	independent GO term
myeloid dendritic cell differentiation	0.615385	0.817378	independent GO term
positive regulation of macrophage activation	0.736842	0.817378	independent GO term
positive regulation of vascular permeability	1	0.817378	independent GO term
natural killer cell degranulation	0.5	0.817378	independent GO term
negative regulation by host of viral transcription	0.551724	0.817378	independent GO term
histone H4-K5 acetylation	0.333333	0.817378	independent GO term
histone H4-K8 acetylation	0.333333	0.817378	independent GO term
regulation of DNA methylation	0.466667	0.817378	independent GO term
canonical Wnt signaling pathway involved in positive regulation of epithelial to mesenchymal transition	1	0.817378	independent GO term
canonical Wnt signaling pathway involved in mesenchymal stem cell differentiation	0.5	0.817378	independent GO term
canonical Wnt signaling pathway involved in osteoblast differentiation	0.5	0.817378	independent GO term
protein import into peroxisome membrane	0	0.817378	independent GO term
regulation of circadian sleep/wake cycle, non-REM sleep	0.521739	0.817378	independent GO term
regulation of interleukin-6 biosynthetic process	0.702703	0.817378	independent GO term
negative regulation of interleukin-6 biosynthetic process	0.666667	0.817378	dependent GO term
positive regulation of interleukin-6 biosynthetic process	0.761905	0.817378	dependent GO term
negative regulation of B cell differentiation	0.666667	0.817378	dependent GO term
positive regulation of keratinocyte differentiation	0.625	0.817378	independent GO term
negative regulation of macrophage differentiation	0.5	0.817378	independent GO term
negative regulation of gluconeogenesis	0.375	0.817378	dependent GO term
positive regulation of fatty acid biosynthetic process	0.666667	0.817378	independent GO term
positive regulation of epidermal growth factor-activated receptor activity	0.647059	0.817378	dependent GO term
negative regulation of Notch signaling pathway	0.588235	0.817378	independent GO term
negative regulation of heart contraction	0.909091	0.817378	independent GO term
negative regulation of glucose import	0.85	0.817378	dependent GO term
platelet activating factor metabolic process	0.75	0.817378	independent GO term
phosphatidic acid metabolic process	0.8	0.817378	independent GO term
ceramide biosynthetic process	0.5	0.817378	dependent GO term
viral budding	0.5	0.817378	independent GO term
viral mRNA export from host cell nucleus	0	0.817378	independent GO term
positive regulation of protein export from nucleus	0.621622	0.817378	dependent GO term
regulation of RNA export from nucleus	0.3	0.817378	independent GO term
negative regulation of RNA export from nucleus	0	0.817378	dependent GO term
positive regulation of saliva secretion	1	0.817378	independent GO term
mitochondrion transport along microtubule	0.5	0.817378	independent GO term
positive regulation of isotype switching to IgG isotypes	0.777778	0.817378	independent GO term
positive regulation of retinoic acid receptor signaling pathway	0.727273	0.817378	independent GO term
negative regulation of dendrite morphogenesis	0.444444	0.817378	dependent GO term
regulation of B cell receptor signaling pathway	0.72973	0.817378	independent GO term
positive regulation of nitric-oxide synthase activity	0.644444	0.817378	independent GO term
barbed-end actin filament capping	0.75	0.817378	independent GO term
positive regulation of immunoglobulin secretion	0.416667	0.817378	dependent GO term
DNA ligation involved in DNA repair	0.625	0.817378	independent GO term
kinetochore assembly	0	0.817378	independent GO term
negative regulation of neurotrophin TRK receptor signaling pathway	0	0.817378	independent GO term
positive regulation of focal adhesion assembly	0.575758	0.817378	independent GO term
positive regulation of fibrinolysis	0.75	0.817378	independent GO term
regulation of sensory perception of pain	0.689655	0.817378	independent GO term
positive regulation of telomerase activity	0	0.817378	independent GO term
ventricular cardiac muscle cell development	0.52	0.817378	independent GO term
phospholipid homeostasis	0.588235	0.817378	independent GO term
Bergmann glial cell differentiation	0.470588	0.817378	independent GO term
positive regulation of growth hormone secretion	0.5	0.817378	independent GO term
lens induction in camera-type eye	0.714286	0.817378	independent GO term
cilium morphogenesis	0.26087	0.817378	independent GO term
regulation of ventricular cardiac muscle cell membrane repolarization	0.65	0.817378	independent GO term
negative regulation of pathway-restricted SMAD protein phosphorylation	0.647059	0.817378	dependent GO term
epithelial tube branching involved in lung morphogenesis	0.8	0.817378	independent GO term
positive regulation of cardiac muscle contraction	0.772727	0.817378	independent GO term
Type II pneumocyte differentiation	1	0.817378	independent GO term
positive regulation of necroptotic process	0.5	0.817378	independent GO term
positive regulation of vitamin D biosynthetic process	1	0.817378	independent GO term
regulation of calcidiol 1-monooxygenase activity	0.592593	0.817378	independent GO term
positive regulation of calcidiol 1-monooxygenase activity	0.727273	0.817378	dependent GO term
negative regulation of mitotic anaphase-promoting complex activity	0.3	0.817378	dependent GO term
branch elongation involved in salivary gland morphogenesis	0.5	0.817378	independent GO term
mammary gland branching involved in pregnancy	0.6875	0.817378	independent GO term
positive regulation of mast cell chemotaxis	0	0.817378	independent GO term
mesenchymal cell differentiation involved in lung development	0.5	0.817378	independent GO term
dendritic spine morphogenesis	0.473684	0.817378	independent GO term
positive regulation of myeloid leukocyte cytokine production involved in immune response	0.833333	0.817378	independent GO term
positive regulation of dermatome development	0	0.817378	independent GO term
negative regulation of transcription from RNA polymerase II promoter in response to hypoxia	1	0.817378	independent GO term
negative regulation of chemokine-mediated signaling pathway	1	0.817378	independent GO term
negative regulation of mucus secretion	1	0.817378	independent GO term
nucleotide-binding oligomerization domain containing 2 signaling pathway	0.578947	0.817378	independent GO term
positive regulation of uterine smooth muscle contraction	0.703704	0.817378	independent GO term
regulation of centromeric sister chromatid cohesion	1	0.817378	independent GO term
caveola assembly	0.625	0.817378	independent GO term
protein localization to chromatin	0	0.817378	independent GO term
transcriptional activation by promoter-enhancer looping	0.5	0.817378	independent GO term
negative regulation of transcription involved in G1/S transition of mitotic cell cycle	0.4	0.817378	independent GO term
minus-end-directed organelle transport along microtubule	0	0.817378	independent GO term
interleukin-12 secretion	0.5	0.817378	independent GO term
DNA demethylation	0.421053	0.817378	independent GO term
atrial cardiac muscle cell action potential	0.642857	0.817378	independent GO term
regulation of monocyte chemotaxis	0.707317	0.817378	independent GO term
positive regulation of monocyte chemotaxis	0.807692	0.817378	dependent GO term
positive regulation of deacetylase activity	0.5	0.817378	independent GO term
negative regulation of cell migration involved in sprouting angiogenesis	0.7	0.817378	independent GO term
positive regulation of synapse maturation	0.410256	0.817378	independent GO term
positive regulation of chemokine secretion	0.75	0.817378	independent GO term
regulation of arachidonic acid secretion	0.777778	0.817378	dependent GO term
positive regulation of arachidonic acid secretion	0.5	0.817378	dependent GO term
spindle assembly involved in mitosis	0.35	0.817378	independent GO term
alpha-amino-3-hydroxy-5-methyl-4-isoxazole propionate selective glutamate receptor clustering	0.5	0.817378	independent GO term
N-methyl-D-aspartate receptor clustering	0.416667	0.817378	independent GO term
neuronal stem cell maintenance	0.6	0.817378	independent GO term
semaphorin-plexin signaling pathway involved in bone trabecula morphogenesis	0	0.817378	independent GO term
negative regulation of hydrogen peroxide-mediated programmed cell death	1	0.817378	independent GO term
regulation of smooth muscle cell-matrix adhesion	1	0.817378	independent GO term
positive regulation of receptor activity	0.588235	0.817378	independent GO term
positive regulation of chemokine (C-X-C motif) ligand 2 production	0.7	0.817378	independent GO term
positive regulation of dendritic cell chemotaxis	0.555556	0.817378	independent GO term
positive regulation of DNA biosynthetic process	0.4	0.817378	independent GO term
negative regulation of dendritic cell apoptotic process	1	0.817378	independent GO term
positive regulation of mesenchymal stem cell differentiation	0.5	0.817378	independent GO term
negative regulation of dendritic cell differentiation	1	0.817378	independent GO term
regulation of acetyl-CoA biosynthetic process from pyruvate	0.545455	0.806542	dependent GO term
regulation of acyl-CoA biosynthetic process	0.647059	0.806542	independent GO term
growth hormone receptor signaling pathway	0.666667	0.751913	independent GO term
pro-B cell differentiation	0.631579	0.738979	independent GO term
positive regulation of immune response to tumor cell	0.578947	0.738979	independent GO term
positive regulation of natural killer cell mediated cytotoxicity directed against tumor cell target	0.5	0.738979	dependent GO term
regulation of the force of heart contraction by chemical signal	0.791667	0.738979	independent GO term
pyrimidine nucleotide biosynthetic process	0.48	0.738979	independent GO term
carnitine shuttle	0	0.738979	independent GO term
SMAD protein import into nucleus	0.666667	0.738979	independent GO term
Wnt signaling pathway, calcium modulating pathway	0.5	0.738979	independent GO term
I-kappaB phosphorylation	0.727273	0.738979	independent GO term
bile acid metabolic process	0.727273	0.738979	independent GO term
potassium ion import	1	0.738979	independent GO term
negative regulation of glucose transport	0.793103	0.738979	independent GO term
mRNA modification	0	0.738979	independent GO term
growth hormone secretion	0.7	0.738979	independent GO term
granulocyte differentiation	0.529412	0.738979	independent GO term
negative regulation of B cell proliferation	0.615385	0.738979	dependent GO term
positive regulation of intracellular estrogen receptor signaling pathway	0.764706	0.738979	dependent GO term
negative regulation of histone acetylation	0.590909	0.738979	independent GO term
maternal behavior	0.75	0.738979	independent GO term
positive regulation of glycolytic process	0.676471	0.738979	dependent GO term
progesterone receptor signaling pathway	0.513514	0.738979	independent GO term
positive regulation of cardioblast differentiation	1	0.738979	independent GO term
positive regulation of establishment of protein localization to plasma membrane	0.463415	0.738979	independent GO term
interleukin-1-mediated signaling pathway	0.666667	0.714787	independent GO term
pyruvate metabolic process	0.727273	0.700205	independent GO term
NLS-bearing protein import into nucleus	0.465116	0.668099	independent GO term
ceramide metabolic process	0.588235	0.668099	independent GO term
DNA damage induced protein phosphorylation	0.576923	0.668099	independent GO term
vascular smooth muscle contraction	0.842105	0.668099	independent GO term
attachment of GPI anchor to protein	0.666667	0.668099	independent GO term
histone deubiquitination	0.428571	0.668099	independent GO term
positive regulation of intracellular steroid hormone receptor signaling pathway	0.714286	0.668099	independent GO term
nucleotide-excision repair, DNA incision	0	0.668099	independent GO term
behavioral response to nicotine	1	0.668099	independent GO term
regulation of catenin import into nucleus	0.583333	0.668099	independent GO term
interleukin-2-mediated signaling pathway	0.8	0.668099	independent GO term
enucleate erythrocyte differentiation	0.5	0.668099	independent GO term
regulation of translation in response to stress	0.571429	0.668099	independent GO term
regulation of protein export from nucleus	0.560606	0.668099	independent GO term
clathrin coat assembly	0.47619	0.668099	independent GO term
nuclear pore complex assembly	0	0.668099	independent GO term
regulation of dendritic spine development	0.512195	0.668099	independent GO term
regulation of dendritic spine morphogenesis	0.485714	0.668099	dependent GO term
histone H4 deacetylation	0.538462	0.668099	independent GO term
cellular response to estrogen stimulus	0.714286	0.668099	independent GO term
regulation of fatty acid transport	0.744186	0.668099	independent GO term
positive regulation of T-helper 17 cell lineage commitment	1	0.668099	independent GO term
JAK-STAT cascade involved in growth hormone signaling pathway	0.702703	0.615519	independent GO term
negative regulation of endothelial cell proliferation	0.733333	0.604015	independent GO term
pyrimidine nucleobase catabolic process	0.666667	0.604015	independent GO term
mitotic nuclear envelope reassembly	0.48	0.604015	independent GO term
regulation of epidermal growth factor-activated receptor activity	0.660377	0.604015	independent GO term
triglyceride catabolic process	0.657895	0.604015	independent GO term
N-terminal protein amino acid modification	0.580645	0.604015	independent GO term
follicle-stimulating hormone secretion	0.5	0.604015	independent GO term
negative regulation of B cell activation	0.596491	0.604015	independent GO term
positive regulation of SMAD protein import into nucleus	0.619048	0.604015	independent GO term
positive regulation of epithelial to mesenchymal transition	0.642857	0.571046	independent GO term
nitric oxide mediated signal transduction	0.742857	0.546076	independent GO term
DNA recombinase assembly	0.416667	0.493694	independent GO term
regulation of glycolytic process	0.697674	0.493694	independent GO term
positive regulation of glycogen biosynthetic process	0.76087	0.446335	dependent GO term
ciliary neurotrophic factor-mediated signaling pathway	1	0.446335	independent GO term
positive regulation of interferon-alpha production	0.7	0.403518	independent GO term
tachykinin receptor signaling pathway	0.8	0.364808	independent GO term
positive regulation of glucose metabolic process	0.702703	0.364808	independent GO term
regulation of protein deacetylation	0.462687	0.298169	independent GO term
pathway-restricted SMAD protein phosphorylation	0.666667	0.273101	independent GO term
activation of NF-kappaB-inducing kinase activity	0.606061	0.269562	independent GO term
patterning of blood vessels	0.7	0.220318	independent GO term
transcription initiation from RNA polymerase I promoter	0.387097	0.218875	independent GO term
transcription from RNA polymerase I promoter	0.387097	0.203022	independent GO term
C-terminal protein lipidation	0.666667	0.199179	independent GO term
regulation of glycogen biosynthetic process	0.688525	0.180067	independent GO term
nucleotide-excision repair, DNA damage removal	0.3125	0.13814	independent GO term
transcription elongation from RNA polymerase I promoter	0.416667	0.108737	independent GO term
termination of RNA polymerase I transcription	0.416667	0.0983018	independent GO term
platelet-derived growth factor receptor signaling pathway	0.633333	0.0803391	independent GO term
